# Supplementary material for: Integrative Analysis of the Metabolome and Transcriptome of a Cultivated Pepper and Its Wild Progenitor Chiltepin (Capsicum annuum L. var. glabriusculum) Revealed the Loss of Pungency During Capsicum Domestication
Source: Front Plant Sci. 2022 Jan 5;12:783496. doi: 10.3389/fpls.2021.783496 (PMC8767146; doi:10.3389/fpls.2021.783496)
Supplement: Supplementary file 1 [file Table_1.XLSX]

## Sheet: Sheet1
Supplementary Table S1. Primers used in the qRT-PCR
Gene name	Forward primer sequence (5′-3′)	Reverse primer sequence (5′-3′)
Actin	CGTGGTGGCTTTTGAGAAT	AAGCACACAAACACAATGTCAC
AT3-D2	CAAGGGCAGAAGTTGTTAG	TCAATGTCCTGCTCGTTAG
AT3-D1	AAACCTTCCTCTCTCACCCCCTCT	AGCATTGTCCTTCAACTTTCCAGC
MYB31	GCCGGACTCCTACCTTGTAT	TTCTTCATTCCATTTTCGTC
PAL-D2	TTGGAAGCGATAACGAAGT	TTAGGTCTGCCAGTAAGCA
GT86A1	CGTCAACACACAATCAA	TCAGAGGAAAACCATCA
C4H-D2	GAGCCAGACACCCACAAGC	CCAACACCGAATGGAAGGA
KasI-D1	CAACTGCCAATTACTGCTT	TATGAGACCACCAACACCA
KasI-D5	AGATTGATAAGGAGCGAGCAG	TACCAAGCAAAGCAGAGCC
