# Supplementary material for: Integrative Analysis of the Metabolome and Transcriptome of a Cultivated Pepper and Its Wild Progenitor Chiltepin (Capsicum annuum L. var. glabriusculum) Revealed the Loss of Pungency During Capsicum Domestication
Source: Front Plant Sci. 2022 Jan 5;12:783496. doi: 10.3389/fpls.2021.783496 (PMC8767146; doi:10.3389/fpls.2021.783496)
Supplement: Supplementary file 2 [file Table_2.XLSX]

## Sheet: Sheet1
Supplementary Table S2. All detected and annotated metabolites in the BB3 and chiltepin fruits
Q1 (Da)	Q3 (Da) MS only	Rt (min)	Match score*	Molecular Weight (Da)	Ionization model	Class	Compounds	Fragments	BB3									Chiltepin
									11DAP	SEM	22DAP	SEM	33DAP	SEM	55DAP	SEM		11DAP	SEM	22DAP	SEM	33DAP	SEM	55DAP	SEM
304.2	168.2	7.43	1	305.199	[M-H]-	Phenolamides	Capsaicin	304.2, 135.1	NA	NA	63800	1900	76700	14400	5980	1190		4530000	894315	4.54667e+06	1.04952e+06	7910000	565744	7.69667e+06	337277
306	170	7.93	1	307.215	[M-H]-	Phenolamides	Dihydrocapsaicin	306.2, 170.1	2445	698.105	55600	17900	124550	33450	12925	3375		10550000	350000	9450000	3.00601e+06	1.66333e+07	1.78201e+06	1.51333e+07	385861
293.2	234.5	2.5	1	292.2	[M+H]+	Phenolamides	N-Caffeoyl agmatine	293.162, 163.2	NA	NA	2.34667e+07	6.81876e+06	38900000	5.04843e+06	3.27333e+07	5.20854e+06		4.33333e+06	1.48023e+06	NA	NA	2.04667e+06	490533	2.45333e+06	979331
369.1	207.5	3.72	1	368.1	[M+H]+	Coumarins	N-sinapoyl hydroxycoumarin	369.119, 207.1	414667	27932.5	1132000	187709	1.64333e+06	158395	1.97667e+06	268494		1.15333e+06	232140	1.37667e+06	130213	1.12667e+06	82192.2	1588000	578165
121	77.1	1.14	1	120	[M+H]+	Saccharides and Alcohols	D(-)-Threose	121.042, 93.058	228133	190172	119167	21080.5	206667	25223.4	284000	30626.8		157000	14764.8	76666.7	29769.5	124167	45982.5	138667	14383.6
341.1	179.4	2.47	1	340.1	[M+H]+	Phenolic acids	Sinapoyl malate	341.079, 207.066	1.69333e+06	264113	4.06333e+06	399694	8.14333e+06	688783	6.60667e+07	4.99155e+06		NA	NA	NA	NA	NA	NA	NA	NA
479	317.3	3.84	1	478	[M+H]+	Flavonols	methylQuercetin O-hexoside	479, 317.1	22600	3847.94	27366.7	4150.77	22936.3	16340.1	43700	9295.52		1.75667e+06	94633.8	1.35333e+06	112645	489000	97307.1	1.03833e+06	125853
479.1	302.8	3.54	1	478.1	[M+H]+	Flavones	Selgin 5-O-hexoside	479.118, 317.1	151667	20725.7	NA	NA	NA	NA	NA	NA		737000	33892	409003	290819	365667	63573.2	1.21467e+06	266765
308.2	220.5	1.28	1	307.2	[M+H]+	Phenolamides	N-Caffeoylspermidine	308.196, 163.2	47339.3	66935.2	1141000	429954	2.48667e+06	132246	2.06667e+06	315630		583339	824954	NA	NA	3.13333e+06	1.01539e+06	4960000	1.69271e+06
153	135.3	3.14	1	152	[M+H]+	Phenolic acids	o-Anisic acid	153.047, 135.042	10872.7	15363.5	37469.7	26742.3	27469.7	22013	72266.7	7543.8		20603	15643.6	48100	8131.83	62800	18471.8	41633.3	2867.44
438.2	147.5	3.37	1	437.2	[M+H]+	Phenolamides	N', N''-di-p-coumaroylspermidine	438.239, 147.2	NA	NA	58400	14843.4	35533.3	4179.58	433333	44394.7		12939.3	18286.3	54566.7	7824.04	39900	2004.99	74933.3	9338.93
435.1	339.7	3.74	1	434.1	[M+H]+	Flavonoid carbonoside	Naringenin C-hexoside	435.1, 285.1	534667	62510.4	643667	139648	608667	138983	1440000	134412		1.09667e+06	41096.1	793000	13490.7	662333	125061	2.47333e+06	342961
565	317.8	4.32	1	564	[M+H]+	Flavones	Selgin O-malonylhexoside	565, 317	6072.67	8575.32	59300	909.212	82600	10472.8	57666.7	1635.71		9.89333e+06	1.34564e+06	5.23667e+06	781466	2.16667e+06	238374	3.62667e+06	387241
551.1	347.4	4.47	1	550.1	[M+H]+	Flavonols	Quercetin-3-(6''-malonyl)-Glucoside	551.1, 181.1	NA	NA	NA	NA	NA	NA	NA	NA		138000	24262.5	170333	18803.1	151000	14445.3	126333	13097.9
521	317.6	4.46	1	520	[M+H]+	Flavanones	Naringenin O-malonylhexoside	521, 273	2.23333e+07	3.16684e+06	2.22333e+06	1.40488e+06	2.79333e+06	881602	6960000	954603		2.29333e+06	416040	2.85667e+06	380555	737667	218977	5.44333e+06	1.15361e+06
551	347.4	4.52	1	550	[M+H]+	Flavones	Tricetin O-malonylhexoside	551, 303.1	7339.33	10366.7	76866.7	23317.7	79833.3	6882.02	78966.7	16607.3		199667	31094.8	198000	20832.7	107233	19200.1	845667	133480
503	255.6	5.23	1	502	[M+H]+	Flavones	Chrysin O-malonylhexoside	503, 255	283333	9809.29	207333	16680	242333	22171.1	178333	6128.26		NA	NA	NA	NA	NA	NA	NA	NA
138.1	77.2	1.18	1	137.1	[M+H]+	Phenolamines	Hydroxyphenethylamine	138.091, 121.1	1.02833e+06	37932.7	2.50667e+06	106562	1.70667e+06	422874	2.81333e+06	723203		7700000	1.87387e+06	2.38333e+07	1.51511e+06	18300000	1.68721e+06	3.75333e+06	188385
565.2	499.3	3.67	1	564.2	[M+H]+	C-glycosylated flavones	C-pentosyl-C-hexosyl-apigenin	565.2	1.11667e+07	7.89866e+06	1.62333e+07	1.16248e+07	3.32667e+07	3.51789e+06	2.74667e+07	3.11805e+06		8.37667e+06	1.06365e+06	2.66667e+06	175942	3.01667e+06	315947	4.53333e+06	458863
433.1	271.7	3.73	1	432.1	[M+H]+	C-glycosylated flavones	Apigenin C-glucoside	433.113, 283.1	20400000	1.65731e+06	2.12667e+07	3.82739e+06	2.14667e+07	7.07358e+06	2.66667e+07	1.79877e+06		2.35667e+07	169967	7240000	980714	6520000	896698	12300000	2.06074e+06
286	124.3	2.03	1	285	[M+H]+	Vitamins	Nicotinic acid-hexoside	286, 124	9230000	326190	7.28667e+06	365270	4.19667e+06	124722	1.62333e+07	1.01434e+06		1012000	120698	670000	35693.1	163667	22983.1	1.96667e+06	16996.7
309	147.5	2.83	1	308	[M+H]+	Phenolamides	N-sinapoyl cadaverine	309, 207	NA	NA	153333	10498.7	229000	7483.31	339333	30619.5		NA	NA	NA	NA	NA	NA	NA	NA
250	191.3	2.87	1	250	[M]+	Cholines	Coumaroyl choline	250, 147	1.59667e+06	47842.3	936000	384697	1.52333e+06	483207	3.37333e+06	983237		3490000	446990	4390000	377094	4.27667e+06	553795	2.82667e+06	273537
627.1	465.2	4.77	1	626.1	[M+H]+	Flavonol	Quercetin-3,4'-O-di-beta-glucopyranoside	627.1, 465	NA	NA	NA	NA	297000	60816.7	234000	102645		343000	145123	47833.3	13625.1	272333	43284.6	234000	54790.5
268	131.3	5.91	1	267	[M+H]+	Phenolamides	Cinnamoyl tyramine	268, 121	13800	898.146	14533.3	1114.55	14303	10537.6	NA	NA		154333	18926.8	240667	22065.6	272333	33109.2	77500	3203.12
280	178.4	2.77	1	280	[M]+	Phenolamides	Feruloylcholine	280.15576, 221.0817, 177.0547, 145.0284, 206.0576, 117.0334	599667	96679.3	297000	41303.8	625667	17613.1	700333	43622.1		452667	61440.1	684667	98608.1	1.27333e+06	96724.1	4900000	873957
206.1	132.4	2.2	1	205.1	[M+H]+	Organic acids	Xanthurenic acid	206.1, 177.9812	215333	40614.7	76600	11203.9	206000	19815.8	417667	60604.4		NA	NA	NA	NA	219333	25746.6	957000	164841
256.2	124	0.8	1	255.2	[M+H]+	Vitamins	Nicotinate ribonucleoside	256.2, 124.1	1.88333e+07	2.16384e+06	2.42667e+07	1.67796e+06	29600000	1.1225e+06	36900000	2.62805e+06		5.33667e+06	479189	1.05133e+07	1.21725e+06	1.79667e+07	1.89268e+06	18600000	374166
535.3	487.2	5.74	1	534.3	[M+H]+	Flavones	Tricin 7-O-acetylglucoside	535.3	12433.3	555.778	200667	27980.2	118667	6944.22	60566.7	5191.23		39066.7	3725.89	76600	2060.74	78233.3	9242.05	70866.7	9210.98
295.2	179.5	9.18	1	294.2	[M+H]+	Fatty acids	9-Hydroxy-(10E,12Z,15Z)-octadecatrienoic acid	295.2, 179.2	1.25667e+07	3.61509e+06	2.24667e+06	786313	643000	81612.9	940333	339333		5260000	2.58009e+06	2100000	692291	3040000	347563	4.68667e+06	2.01545e+06
132.1	86.2	0.99	1	131.1	[M+H]+	Fatty acids	5-Aminolevulinate	132.1, 86.1	685000	109493	1670000	176824	2.48333e+06	196186	1.53667e+06	167796		1.74333e+06	280159	1.46667e+06	79302.5	1120000	43204.9	2.66333e+06	282174
369.1	207.5	3.43	1	368.1	[M+H]+	Phenolic acids	1-O-Feruloyl quinic acid	369.1, 177.1	1062000	246431	318000	85182.2	174000	12027.7	138000	9416.3		5.46667e+06	2.26363e+06	4.97333e+06	731407	2.43333e+06	36817.9	1.26333e+06	110855
417.2	255.8	4.96	1	416.2	[M+H]+	Flavones	Chrysin O-hexoside	417.2	4270000	64807.4	2790000	88317.6	2.61333e+06	228813	1.85667e+06	30912.1		341667	128868	123667	21545.8	NA	NA	NA	NA
419.1	383.9	3.81	1	418.1	[M+H]+	C-glycosylated flavones	O-methylnaringenin C-pentoside	419.1, 383.1	967000	62198.6	413667	31721	384000	56148.6	370000	32629.2		153000	16391.1	146333	17594.2	149667	15691.5	148667	18909.1
258.2	125.2	0.8	1	258.2	[M]+	Cholines	sn-Glycero-3-phosphocholine	258.2, 104.2	1710000	229056	1.16667e+06	85764.5	2.23667e+06	509924	1014000	286985		374333	108500	197333	20854	740333	96375.4	1.59667e+06	9428.09
145.1	74	0.73	1	146.1	[M-H]-	Organic acids	Methylglutaric acid	145.06, 101.06	52233.3	10545.2	103233	11215	56600	2039.61	113667	13123.3		35300	1704.89	42666.7	2145.28	29533.3	3805.55	17266.7	2610.66
96	80.2	1.07	1	95	[M+H]+	Pyridine alkaloids	3-Hydroxypyridine	96.04, 68.05	279000	95565	225667	50307.9	235000	55160.4	50200	8163.74		413000	96065.9	329000	32751.6	80900	24395.5	62200	12381.7
417.2	381.9	3.98	1	416.2	[M+H]+	C-glycosylated flavones	Chrysin C-hexoside	417.2, 297.1	51936.3	36856	215333	10208.9	422667	26042.7	271667	44251.8		878000	123361	733667	49134.7	573667	63861	1.29333e+06	237954
337	275.8	3.24	1	338	[M-H]-	Phenolic acids	5-O-p-Coumaroylquinic acid	337.09428, 163.0416, 191.0569, 119.051, 173.046, 155.0354	11050000	1.3435e+06	79166.7	26040.3	39633.3	6826.58	25366.7	2858.13		4.55667e+06	1.30395e+06	3.32667e+06	928416	606667	107419	358000	110312
449.1	300	3.47	1	448.1	[M+H]+	C-glycosylated flavones	Luteolin 6-C-glucoside	449.1, 299.1	1178000	560431	3.29333e+06	709851	5.62333e+06	2.02502e+06	5.58667e+06	1.70052e+06		1.10333e+08	1.39124e+07	2.57333e+07	7.53761e+06	3.04667e+07	6.36885e+06	5.95667e+07	1.45539e+07
509.3	347.9	3.46	1	508.3	[M+H]+	Flavones	Limocitrin O-hexoside	509.3, 347.1	593000	68063.7	2.01333e+06	126579	5.34333e+06	619910	5640000	384794		5.09333e+06	364173	4.87333e+06	124722	5610000	200499	1.47333e+07	865384
757.3	450.1	3.47	1	756.3	[M+H]+	C-glycosylated flavones	C-hexosyl-apigenin O-hexosyl-O-hexoside	757.3, 595.2	NA	NA	NA	NA	798333	108278	1.91667e+06	311805		NA	NA	NA	NA	115767	19130.5	227333	111548
341	179.2	3.01	1	342	[M-H]-	Phenolic acids	Caffeic acid O-glucoside	341, 135	9.12333e+06	981914	36100000	4.6669e+06	31300000	4.00333e+06	17300000	648074		1.26667e+07	1.79691e+06	1.33667e+07	654896	1.04233e+07	586307	7050000	663526
479.2	318	4.11	1	478.2	[M+H]+	Flavones	Isorhamnetin O-hexoside	479.2, 317.2	101800	31817.1	187336	132470	NA	NA	660667	41233.8		8.62667e+06	412499	2.28333e+06	379678	2.28667e+06	346538	4.09667e+06	520150
122	105.3	2.31	1	121	[M+H]+	Amides	Benzamide	122, 105	1.94333e+06	138884	1.32667e+06	44969.1	1250000	49665.5	5.35333e+06	872442		2690000	163911	5.12667e+06	398358	4.87667e+06	210766	3660000	312730
375.2	137.6	3.43	1	374.2	[M+H]+	Phenolic acids	Feruloyl syringic acid	375.2, 137.1	3.30667e+06	314784	4.49333e+06	212968	2.45667e+06	111455	506667	95349.6		57400	1003.33	132667	20270.4	110933	30707.4	67200	8854.75
213.3	97.3	4.63	1	212.3	[M+H]+	Free fatty acids	delta-Tridecalactone	213.3, 81	NA	NA	NA	NA	NA	NA	NA	NA		159670	114656	402000	38995.7	573333	49748.3	477000	38841.6
203	133.3	4.66	1	202	[M+H]+	Phenolamines	N-Acetyl tryptamine	203, 144	NA	NA	NA	NA	NA	NA	NA	NA		788000	111448	746333	69442.2	347667	43361.5	315667	66904.6
165.1	95.5	5.99	1	164.1	[M+H]+	Phenolic acids	Caffeic aldehyde	165.05059, 91.0525, 119.0467, 147.041, 65.0378	211000	44951.8	179000	19252.7	118667	13912.4	293667	54236.1		338667	17594.2	240333	6944.22	176333	5436.5	186000	23622
351	259.8	6.62	1	350	[M+H]+	Glycerol ester	MAG (18:4) isomer1	351, 147.1	183333	28452.7	50000	7172.63	NA	NA	NA	NA		178000	25468.9	105333	4784.23	69733.3	13829.8	59033.3	11815.9
696.4	696.2	7.53	1	695.4	[M+H]+	Glycerol ester	DGMG (18:2) isomer2	696.4	264333	102828	198000	1632.99	390667	95726.5	389333	46920.7		304000	77075.7	80100	15387.7	92066.7	20533.1	116867	13920.1
353.3	261.8	7.53	1	352.3	[M+H]+	Glycerol ester	MAG (18:3) isomer5	353.3, 261.1	3.84333e+06	1.37689e+06	2.88667e+06	101434	5360000	1.52033e+06	4.66333e+06	513182		3470000	706305	1.14767e+06	256380	978000	185593	1.17067e+06	138375
696.4	337.8	8.05	1	695.4	[M+H]+	Glycerol ester	DGMG (18:2) isomer1	696.4	2290000	843682	1.98333e+06	40276.8	5.15333e+06	1.23818e+06	1.18667e+06	49216.1		3.40333e+06	733136	1.69333e+06	263354	1.77667e+06	555718	1.73667e+06	162138
696.4	696.3	8.24	1	695.4	[M+H]+	Glycerol ester	DGMG (18:2) isomer3	696.4	105300	36282.9	444667	25223.4	1417000	375666	90433.3	18083.9		612000	120535	306667	24526.6	552333	173331	319667	45762.7
700.1	184.4	9.28	1	699.1	[M+H]+	Lipids_Glycerophospholipids	PC 16:1/14:1	700.1, 184.4	228333	36279.8	40369.7	32309.3	NA	NA	NA	NA		83600	16621.1	72300	8888.57	26469.7	18774.7	NA	NA
298.1	166.5	1.14	1	297.1	[M+H]+	Nucleotides and derivatives	N2-methylguanosine	298.1, 166.3	775667	44289.5	473667	24308.2	882333	51654.8	1290000	92736.2		481667	35873.2	525000	20049.9	308667	24363	634667	41411.2
153	136.4	1.16	1	152	[M+H]+	Nucleotides and derivatives	Xanthine	151.02666, 108.0208, 151.0231, 65.9968, 93.0341, 134.015	379000	84652.2	236333	37419.5	163000	21602.5	154333	44902.4		1042000	140741	342667	30554.1	382333	30346.2	482000	80029.2
310	251.6	2.96	1	310	[M]+	Phenolamines	Sinapoylcholine	310, 251	878667	349328	7.44333e+06	1.0684e+06	1.81333e+07	5.98906e+06	3.42333e+07	9.53496e+06		5.26333e+06	2.64956e+06	6380000	2.99481e+06	1.41667e+07	2.71825e+06	44200000	3.21485e+07
137.3	94.3	3.19	1	136.3	[M+H]+	Phenolic acids	p-Aminobenzoate	137.3, 94.2	729667	48582.1	1.49333e+06	41899.4	1.86667e+06	70395.7	1097000	145687		779000	144271	1.11433e+06	146870	994667	140867	1089000	197185
357.2	339.9	8.8	1	356.2	[M+H]+	Glycerol ester	MAG (18:1) isomer2	357.2, 265.4	1590000	285774	344000	10424.3	406667	32097.1	202667	32826.1		398000	50246.1	424000	23280.9	1.10733e+06	201000	864333	96420.4
126.1	97.3	3.66	1	125.1	[M+H]+	Glycerol ester	2-Aminoethylphosphonate	126.1, 96	59733.3	15804.3	57200	15990.2	54933.3	7519.01	32566.7	3445.13		53633.3	6247.31	47500	4982.64	43133.3	1798.77	20200	2201.51
176.1	133.4	3.63	1	175.1	[M+H]+	Plumerane	5-methoxyindole-3-carbaldehyde	176.1, 91.2	NA	NA	NA	NA	NA	NA	NA	NA		147000	16268.6	462000	40653	460000	64161.3	284667	13572.8
251.1	233.5	1.89	1	250.1	[M+H]+	Phenolamines	N-Caffeoyl putrescine	251.1, 163.2	976667	349054	8.75667e+06	2.31949e+06	1.20667e+07	1.77451e+06	1.16733e+07	2.15471e+06		8.14667e+06	2.34358e+06	1.07467e+07	4.28113e+06	2.26667e+07	6.69842e+06	22700000	9.76354e+06
321.1	177.5	2.82	1	320.1	[M+H]+	Phenolamines	N-Feruloyl spermidine	321.1, 177.2	2.42333e+07	4.30297e+06	9.29333e+07	1.57065e+07	8.25667e+07	5.4512e+06	144000000	1.59374e+07		2.42667e+06	696004	1.53667e+06	106562	4.66333e+06	412499	9.33667e+06	1.60753e+06
136.1	119.3	1.89	1	135.1	[M+H]+	Nucleotides and derivatives	Aminopurine	136.1, 118.9	37300000	3.76652e+06	24100000	1.43527e+06	16500000	2.4779e+06	1.14967e+07	1.06616e+06		9390000	2.77564e+06	8340000	2.41008e+06	1.84333e+07	1.668e+06	5830000	1.23604e+06
339.1	177.5	3.84	1	338.1	[M+H]+	Coumarins	O-Feruloyl 4-hydroxycoumarin	339.1, 177.2	NA	NA	382333	16996.7	770667	136290	1.16767e+06	275289		473000	137130	1042000	204242	1.54333e+06	95684.7	1.41333e+06	140554
195.1	177.5	3.19	1	194.1	[M+H]+	Phenolic acids	Hydroxy-methoxycinnamate	195.1, 145.3	254667	95723	25000000	4.67832e+06	5.15667e+07	3.39935e+06	9.94667e+07	1.80697e+07		8.30333e+06	1.69632e+06	8.38333e+06	1.47624e+06	9.51667e+06	587329	1.17333e+07	1.04987e+06
219.1	189.5	3.78	1	218.1	[M+H]+	Tryptamine derivatives	5-Methoxy-N,N-dimethyltryptamine	219.1, 174.4	1.27567e+06	197427	2610000	272886	1250000	70710.7	495000	71512.2		2.88667e+06	757731	6860000	721295	2600000	176824	1.55667e+06	289636
162.1	98.3	0.8	1	161.1	[M+H]+	Amino acids and derivatives	2-Aminoadipic acid (L-Homoglutamic acid)	162.1, 97.9	618667	37650.4	1.64667e+06	150628	2.02667e+06	324277	1.77333e+06	37712.4		1.00533e+06	93453.5	1.49333e+06	98432.2	3360000	113137	2290000	159374
458.1	116.4	0.79	1	457.1	[M+H]+	Amino acids and derivatives	Aspartic acid di-O-glucoside	458.1, 116.3	562333	117783	1078000	76993.5	759333	186507	1990000	319479		736000	382229	433000	70204.5	1.62333e+06	122293	3040000	351852
178	161.5	1.55	1	177	[M+H]+	Amino acids and derivatives	N-formylmethionine	178, 161	8572.67	12110.9	35166.7	2085.4	32833.3	7966.74	352667	122448		375333	133027	495667	102795	849000	137528	12160000	3.07926e+06
104.1	60.2	0.74	1	103.1	[M+H]+	Cholines	Choline	104.1, 60.1	1.60333e+07	1.32749e+06	18300000	697615	15800000	927362	1.42333e+07	543650		13900000	941630	1.43667e+07	492161	1.41333e+07	47140.5	12700000	1.42361e+06
397.1	147.4	1.69	1	396.1	[M+H]+	Phenolamines	N-hexosyl-p-coumaroyl putrescine	397.1, 147.3	518333	79315.1	779667	138401	2.69333e+06	177451	7.25667e+06	1.28609e+06		3.09333e+06	236267	1.42333e+06	175182	2.08667e+06	437442	6070000	640625
235.1	147.5	2.27	1	234.1	[M+H]+	Phenolamines	N-p-Coumaroyl putrescine	235.1, 146.8	1.19333e+07	776030	2.47333e+06	122837	1.87333e+06	294882	1340000	131403		13320000	3.22441e+06	1.26333e+07	478423	8.78333e+06	1.28863e+06	6810000	726774
584.2	325.8	2.49	1	583.2	[M+H]+	Phenolamides	N',N"",N""'-p-coumaroyl-cinnamoyl-caffeoyl spermidine	584.2	3.22333e+06	335890	2360000	196469	2.11667e+06	823097	427667	59466.1		797333	100745	1690000	486415	5.61667e+06	1.737e+06	511667	88137.5
277.2	260.8	2.55	1	276.2	[M+H]+	Phenolamines	N'-p-Coumaroyl agmatine	277.2, 147.2	2.46333e+06	161107	606667	108168	1.40667e+06	366273	1109000	198818		3560000	1.6495e+06	3.45333e+06	583571	4.18333e+06	544814	2.04333e+06	151070
295	207.6	2.7	1	294	[M+H]+	Phenolamines	N-Sinapoyl putrescine	295, 206.9	NA	NA	1.71667e+07	2.41431e+06	1.93333e+07	1.75182e+06	2.12333e+07	1.8625e+06		2.39333e+06	313829	1.45667e+06	506776	5.85333e+06	1.32505e+06	13040000	8.60344e+06
307.2	177.5	2.71	1	306.2	[M+H]+	Phenolamines	N-Feruloyl agmatine	307.2, 177.2	4.29667e+06	229541	10090000	2.91013e+06	9870000	2.17591e+06	1.11467e+07	2.1017e+06		377667	192718	222333	27010.3	676333	23907.2	718667	93674.4
337.2	207.5	2.98	1	336.2	[M+H]+	Phenolamines	N-Sinapoyl agmatine	337.1868, 207.0661, 175.0399, 114.1028, 147.0442	NA	NA	1.21333e+06	94633.8	1.80333e+06	212341	19100000	4.70177e+06		NA	NA	NA	NA	NA	NA	NA	NA
131.1	72.1	0.64	1	130.1	[M+H]+	polyamine	Agmatine	131.11754, 72.0813, 114.0921, 55.0547, 60.0451	1.24667e+08	1.74611e+07	26200000	3.47659e+06	3.34333e+07	3.87671e+06	7.83667e+06	1.45699e+06		116000000	816497	1.08267e+08	9.10726e+06	5.76667e+07	7.5017e+06	5.91333e+06	530995
439.1	147.4	2.19	1	438.1	[M+H]+	Phenolamines	N-(4'-O-glycosyl)-p-coumaroyl agmatine	439.1, 147.4	289333	33069	458667	23342.9	541333	71788.3	469000	104310		1.27067e+06	244515	1.18667e+06	16996.7	1.07067e+06	77120.4	917333	34198.8
469.1	307.7	2.3	1	468.1	[M+H]+	Phenolamines	N-(4'-O-glycosyl)-feruloyl agmatine	469.1, 177.4	1.57333e+06	140079	5.89667e+06	1.04984e+06	5.00667e+06	751901	4.63667e+06	479328		154433	56207.7	171000	17907.2	266333	29238.5	318000	7874.01
235.1	147.4	2.27	1	234.1	[M+H]+	Phenolamines	N'-p-Coumaroyl putrescine	235.1, 147.2	1.36667e+07	1.0873e+06	2.94333e+06	191891	2140000	449073	1.60667e+06	228668		1.57667e+07	3.65726e+06	1.45667e+07	694422	10110000	1.43766e+06	7.89333e+06	769083
277.1	147.5	2.56	1	276.1	[M+H]+	Phenolamines	N-p-Coumaroyl agmatine	277.1	5.27333e+06	421215	1420000	243858	3.76667e+06	946338	2.83333e+06	695909		9.68667e+06	3.76711e+06	8.97333e+06	1.44059e+06	10400000	1.17757e+06	5.00667e+06	477796
348.1	136.4	0.85	1	347.1	[M+H]+	Nucleotides and derivatives	Adenosine 3'-monophosphate	346.1, 210.9	1288000	423613	6160000	984784	7.07667e+06	262467	1.09567e+07	1.77607e+06		1280000	53541.3	3.41333e+06	334896	4540000	343220	2.27333e+06	222161
664.2	524.1	1.14	1	663.2	[M+H]+	Nucleotides and derivatives	Nicotinic acid adenine dinucleotide	662.11, 540.1	7.06333e+06	514868	9.77333e+06	1.0655e+06	5290000	109848	13300000	909212		9510000	521344	6.76333e+06	1.18311e+06	2010000	336551	4950000	155778
349.1	137.4	1.13	1	348.1	[M+H]+	Nucleotides and derivatives	Inosine 5'-monophosphate	347, 135	341000	84974.5	1.65333e+06	319618	1.46667e+06	103387	2250000	123558		486667	76786.9	997333	129206	994333	66615	364667	48320.7
477.1	315.6	3.31	1	477.1	[M]+	Anthocyanidins	Rosinidin O-hexoside	477.1, 315	117767	28904	237333	33529.4	865333	91714.5	3370000	216487		422333	39516.5	366000	15253.4	421333	41104.2	1390000	42426.4
509.1	347.7	3.36	1	508.1	[M+H]+	Flavonols	Syringetin 3-O-hexoside	509.1, 347.2	588000	93448.7	1.90333e+06	77172.2	5180000	757496	4.80667e+06	359660		4360000	358143	4620000	248596	5.08667e+06	334896	12600000	1.0198e+06
581.2	287.3	3.71	1	580.2	[M+H]+	Flavones	Luteolin O-hexosyl-O-pentoside	581.2, 383.2	90566.7	11590.3	190667	48814.8	114000	4966.55	236000	28284.3		1350000	58878.4	414667	61282.6	343333	49032.9	614000	76685.5
565.1	433.5	3.98	1	564.1	[M+H]+	Flavones	Apigenin O-hexosyl-O-pentoside	563.1, 269.1	177000000	9.89949e+06	8.01667e+07	6.09335e+06	3.22333e+07	3.58267e+06	9980000	1.15966e+06		3.43667e+07	4.79189e+06	5210000	996527	1760000	227596	1.02667e+06	349115
519	271.7	4.45	1	518	[M+H]+	Flavones	Apigenin O-malonylhexoside	519, 271	5910000	457238	431333	334262	560000	149146	539333	126597		24666.7	8933.96	NA	NA	NA	NA	NA	NA
655	287.7	4.59	1	654	[M+H]+	Flavones	Luteolin O-sinapoylhexoside	655, 207	NA	NA	3372.67	4756.94	22800	5666.27	71566.7	20584.2		297333	59979.6	109200	75672.5	245000	97993.2	1.45633e+06	1.0218e+06
669	301.6	4.82	1	668	[M+H]+	Flavones	Chrysoeriol O-sinapoylhexoside	669, 207	NA	NA	NA	NA	NA	NA	3706	5228.35		11003	7825.64	4306	6076.88	9320	1976.33	72000	40259.2
417.1	255.7	4.95	1	416.1	[M+H]+	Flavones	Chrysin 5-O-glucoside (Toringin)	417.1, 255.1	3.60333e+06	256298	2230000	163095	1.46667e+06	164384	1310000	139523		NA	NA	NA	NA	NA	NA	NA	NA
479.2	317.8	4	1	478.2	[M+H]+	Flavones	Isorhamnetin 5-O-hexoside	479.2, 317.2	100967	2191.4	218333	4784.23	NA	NA	591667	58477		8.35333e+06	485821	2150000	579885	2.05333e+06	294090	4010000	759078
595.1	301.8	4.05	1	594.1	[M+H]+	Flavones	Chrysoeriol O-hexosyl-O-pentoside	595.1, 301.4	647000	72842.3	267667	53705	NA	NA	NA	NA		6.24333e+07	1.53756e+07	2.54667e+06	727843	1440000	261661	2080000	481110
449.1	287.6	4.05	1	448.1	[M+H]+	Flavonols	Kaempferol 3-O-glucoside (Astragalin)	447.101, 285	1.27133e+06	449774	84006	118790	201333	62060.9	NA	NA		7.14333e+06	621682	1030000	311743	1.15733e+06	211662	2.45667e+06	703578
433.1	271.7	4.15	1	432.1	[M+H]+	Flavones	Apigenin 7-O-glucoside (Cosmosiin)	431.1, 269.1	30400000	2.41661e+06	1.48467e+06	996139	1025000	542632	1.00067e+06	247729		544667	113729	149333	36353.2	61033.3	16528.8	233000	35580.9
549.1	301.7	4.52	1	548.1	[M+H]+	Flavones	Chrysoeriol O-malonylhexoside	549.1, 301.4	136667	17913.4	29736.3	31177.2	105400	30538.3	110900	15247.5		259667	89890.1	103867	18478.9	100433	23577.7	443333	40745.8
627.1	430	2.76	1	626.1	[M+H]+	C-glycosylated flavones	8-C-hexosyl-hesperetin O-hexoside	627.1, 465.1	NA	NA	NA	NA	NA	NA	NA	NA		381000	58878.4	165500	56728.9	198000	29877.5	705333	144015
611.2	412.3	2.89	1	610.2	[M+H]+	C-glycosylated flavones	C-hexosyl-luteolin O-hexoside	611.2, 473.1	232000	108747	690667	144324	1.09467e+06	336192	1072000	232174		5.20667e+06	823502	1480000	243447	2190000	359537	4720000	822476
625.2	398.1	2.95	1	624.2	[M+H]+	C-glycosylated flavones	6-C-hexosyl chrysoeriol O-hexoside	625.2, 607.1	NA	NA	374000	8831.76	623333	68295.1	458667	22954.1		408000	114196	229000	20215.5	256667	36353.2	737333	120691
611.1	329	3.05	1	610.1	[M+H]+	C-glycosylated flavones	6-C-hexosyl-luteolin O-hexoside	611.1, 431.3	13472.7	19040.5	NA	NA	99003	73030.2	44006	62221.2		1.36333e+06	401442	495333	80093	575667	78155.1	1.18333e+06	165395
581.1	467.9	3.14	1	580.1	[M+H]+	C-glycosylated flavones	C-hexosyl-luteolin C-pentoside	581.1, 515.4	85300	36631.4	144667	29261.3	263000	62246.8	241333	55775.3		3.10667e+06	1.00712e+06	751000	148782	825333	211372	1.78667e+06	319305
581.1	335.9	3.25	1	580.1	[M+H]+	C-glycosylated flavones	6-C-hexosyl luteolin O-pentoside	581.1, 431.3	NA	NA	84233.3	17679.4	138667	13888.4	143333	44319.5		1.09867e+06	363348	304667	61845.7	382333	48030.1	939667	197758
581.1	449.2	3.38	1	580.1	[M+H]+	C-glycosylated flavones	8-C-hexosyl-luteolin O-pentoside	581.1, 419.1	6.74333e+06	663040	340667	86109.7	NA	NA	NA	NA		689670	490587	118670	89458.6	NA	NA	NA	NA
565.1	397.8	3.55	1	564.1	[M+H]+	C-glycosylated flavones	C-hexosyl-apigenin O-pentoside	565.1, 433.3	1.05033e+06	85947	1.38667e+06	225438	1.78333e+06	174611	1.45333e+06	44969.1		836333	116394	284333	30136.7	225000	2449.49	356667	46806.9
739.1	739	3.69	1	738.1	[M+H]+	C-glycosylated flavones	C-rhamnosyl-acacetin O-p-coumaroylhexoside	739.1, 431.3	8143.33	2985.81	10713.3	1374.66	14696.7	6607.27	13500	1235.58		13733.3	2903.25	15766.7	1948.22	100067	18417.6	91766.7	12243.2
611.1	299.8	3.71	1	610.1	[M+H]+	C-glycosylated flavones	8-C-hexosyl-luteolin O-hexoside	611.1, 317.1	25700	7222.65	NA	NA	NA	NA	NA	NA		355000	111268	164667	31255.2	51300	13453.9	NA	NA
611.2	299.8	3.67	1	610.2	[M+H]+	C-glycosylated flavones	Luteolin 8-C-hexosyl-O-hexoside	611.2, 465.1	NA	NA	NA	NA	10472.7	14797.9	NA	NA		853000	78871.2	708667	42866.7	367667	16937.8	645333	20548
755.1	753.9	3.89	1	754.1	[M+H]+	C-glycosylated flavones	C-rhamnosyl-apigenin O-feruloylhexoside	755.1, 417.4	20566.7	694.422	2032.67	2861.9	49966.7	5221.32	33233.3	8167.14		NA	NA	NA	NA	54000	5778.12	51100	9228.58
655.2	655	4.37	1	654.2	[M+H]+	C-glycosylated flavones	C-hexosyl-luteolin O-sinapic acid	655.2, 207.2	NA	NA	NA	NA	6739.33	9518.13	64233.3	4876.02		267333	76951.6	87466.7	65449.3	199667	53878.5	1251000	863111
537	289.7	4.48	1	536	[M+H]+	Flavanones	Eriodictyol O-malonylhexoside	537, 289	71800	16388.4	1.24333e+06	118977	331333	13767.9	79866.7	7386.62		NA	NA	230667	23098.8	163333	24280.8	33039.3	46711.9
565.1	481.7	3.35	1	564.1	[M+H]+	C-glycosylated flavones	C-hexosyl-apigenin C-pentoside	565.1, 433.3	1.34333e+07	817856	1.68333e+07	754247	2.25667e+07	2.91014e+06	16700000	648074		6.95333e+06	1.44375e+06	2600000	240970	2.33667e+06	216384	3.31333e+06	343058
463.1	367.8	3.85	1	462.1	[M+H]+	C-glycosylated flavones	Chrysoeriol 8-C-hexoside	463.1, 313.2	123467	32249.6	306333	52563.2	421000	129401	443667	101608		3880000	466762	1.30567e+06	301315	1180000	108012	4060000	697567
713.1	713.1	2.93	1	712.1	[M+H]+	Flavonols	Quercetin 5-O-malonylhexosyl-hexoside	713.1, 465.1	NA	NA	NA	NA	NA	NA	NA	NA		275000	54869.5	86800	11635.6	79266.7	9365.66	221333	37187.2
713.1	303.6	3.47	1	712.1	[M+H]+	Flavonols	Quercetin 7-O-malonylhexosyl-hexoside	713.1, 465.2	NA	NA	NA	NA	NA	NA	NA	NA		408667	86198.7	167000	26166.1	95966.7	12775.1	117000	15253.4
611.2	303.7	3.64	1	610.2	[M+H]+	Flavonols	Quercetin 7-O-rutinoside	611.2, 303.1	149000	28390.1	153000	37850.6	126000	16573.1	62000	6747.35		1.53333e+07	2.49577e+06	4770000	662168	2820000	489285	1.15933e+07	1.57356e+06
655.2	331.7	4.11	1	654.2	[M+H]+	Flavones	Tricin di-O-hexoside	653.1, 329.2	NA	NA	NA	NA	NA	NA	1229.67	906.686		472333	135480	69100	18547.2	116300	19648.1	139667	16937.8
493.1	331.8	4.24	1	492.1	[M+H]+	Flavones	Tricin 7-O-hexoside	491.1, 315.1	NA	NA	NA	NA	NA	NA	NA	NA		4.50667e+06	3.05489e+06	658000	191484	1.63333e+06	446044	3.91333e+06	419629
321.1	147.5	3.78	1	320.1	[M+H]+	Phenolic acids	5-O-p-Coumaroyl shikimic acid	321.1, 147.3	1.29333e+07	1.68589e+06	276000	98309	133533	31600.1	61603	62911.2		286667	38317.4	252667	23471	328000	57434	101867	3430.58
369.1	177.5	2.99	1	368.1	[M+H]+	Phenolic acids	3-O-Feruloyl quinic acid	369.11723, 177.0551, 145.0288, 117.0337, 207.0669, 149.0586	NA	NA	68803	49754.7	135333	15412.8	217667	18006.2		124567	30357.5	202333	40958	340333	38230.3	429333	13474.3
491.1	329.7	3.04	1	490.1	[M+H]+	Phenolic acids	Anisic acid O-feruloyl hexoside	491.1, 329	NA	NA	NA	NA	NA	NA	96966.7	5197.65		43469.7	31319.7	66500	7349.83	135667	15923.4	210667	46657.1
144.1	142.9	2.62	1	143.1	[M+H]+	Others	4-Methyl-5-thiazoleethanol	144.0718, 115.0542, 143.0718, 117.0689, 127.0535	767000	322715	397667	40285.1	255000	19026.3	212667	7586.54		524667	171475	479667	40876.5	278000	13366.6	169000	29709.7
302.4	284.9	7.3	1	301.4	[M+H]+	Sphingolipids	D-erythro-Dihydrosphingosine	302.4, 60.2	17966.7	2392.12	16933.3	2209.58	17766.7	4817.56	15366.7	2174.6		27200	3159.11	23766.7	4067.21	18266.7	1132.35	29833.3	3559.34
485.1	147.5	3.78	1	484.1	[M+H]+	Plumerane	N-hexosyl-p-coumaroyl serotonin	485.1, 323.1	125000	21181.8	108033	17037.7	160333	18372.7	228333	72926.1		1.28767e+06	387519	548000	32259.4	631333	81683.7	1.37667e+06	268370
353.1	177.5	4.73	1	352.1	[M+H]+	Phenolamines	N-Feruloyl serotonin	353.1, 177.1	136333	15839.5	2.42667e+06	570516	2.27667e+06	1.03093e+06	1.19633e+07	3.073e+06		16090000	4.47335e+06	3.71667e+06	778217	1.07533e+07	874274	94700000	4.03072e+06
314	177.5	4.87	1	313	[M+H]+	Phenolamines	N-Feruloyl tyramine	314, 177	907333	203079	1.26033e+07	4.24107e+06	2.11667e+07	5.45914e+06	5940000	3.5853e+06		4.14667e+07	1.34314e+07	1.43333e+08	8.49837e+06	55200000	5.7434e+06	12280000	2.32969e+06
177.2	160.5	1.55	1	176.2	[M+H]+	Plumerane	N-hydroxy tryptamine	177.2, 160.3	296667	32499.6	821333	95750.8	602667	221163	8370000	3.15129e+06		8.66333e+06	3.2865e+06	10650000	1.7338e+06	1.83333e+07	3.35592e+06	227000000	4.25754e+07
337.1	177.5	2.73	1	336.1	[M+H]+	Phenolamines	N-Feruloyl tryptamine	337.1, 177.4	1.42667e+06	396681	1.33333e+06	324277	232667	471.405	282333	70191.8		871333	79483.1	922667	87366.4	425667	39852.5	326667	112361
86.1	56	1.16	1	85.1	[M+H]+	Piperidine alkaloids	Piperidine	86.1, 69.2	7.17667e+06	840965	1.48667e+07	329983	1.97667e+07	385861	12500000	81649.7		16000000	711805	1.20667e+07	385861	9.54333e+06	236267	17800000	326599
332.1	314.7	1.14	1	331.1	[M+H]+	Vitamins	Pyridoxine O-glucoside	332.1, 314.3	1440000	120277	2.56667e+06	151070	5.38333e+06	829953	1.34667e+07	1.56915e+06		5560000	567803	5.88333e+06	228668	8.50333e+06	169378	13000000	432049
123.1	80.3	1.49	1	122.1	[M+H]+	Vitamins	Niacinamide	123.1, 79.9	14810000	4.11617e+06	5.45667e+06	160278	2640000	249132	785000	78727.4		1.67333e+07	2.71334e+06	1.52333e+07	903081	6800000	1.20916e+06	1.44533e+06	503233
346	184.5	1.57	1	345	[M+H]+	Vitamins	4-Pyridoxic acid O-hexoside	346, 184.1	506667	19189.1	578333	24608	823000	93338.1	2010000	155134		3.75667e+06	102089	2.08667e+06	57927.2	2.43333e+06	191891	3920000	114310
220.2	202.7	2.28	1	219.2	[M+H]+	Vitamins	D-Pantothenic acid	220.11905, 90.0561, 124.0763, 72.0446, 98.0236, 202.1096	3.87333e+07	4.66571e+06	25700000	4.59783e+06	2.84667e+07	4.75558e+06	2.98333e+07	5.42914e+06		1.06933e+07	3.71592e+06	1.06933e+07	2.88029e+06	3.47667e+07	8.02676e+06	2.90667e+07	1.03914e+07
353.1	272.8	2.81	1	352.1	[M+H]+	Coumarins	6,7-dihydroxycoumarin 6-O-quinic acid	353.1, 179	36836.3	30586.6	NA	NA	NA	NA	NA	NA		102833	43497.8	179333	42121.5	122300	17293	103433	31492.5
206.1	147.5	2.48	1	205.1	[M+H]+	Plumerane	Methoxyindoleacetic acid	206.1, 147.5	7.47333e+06	510969	11100000	648074	1.81333e+07	758654	32900000	1.87083e+06		2.29667e+07	7.61154e+06	7620000	1.25868e+06	1.64333e+07	910433	37000000	1.21929e+06
157	130.4	2.45	1	156	[M+H]+	Plumerane	3-Indoleacetonitrile	157, 130	275667	9672.41	295333	37791.8	329667	42318.9	459333	12229.3		457667	111667	219333	66384.4	608333	63300	1.04533e+06	262304
98.9	81.1	0.89	1	97.9	[M+H]+	Organic acids	Phosphoric acid	98.9	8980000	57154.8	10200000	432049	9.46667e+06	1.11455e+06	8050000	808455		8890000	871894	11200000	432049	9460000	764766	9.11333e+06	1.02298e+06
494.3	184.6	7.82	1	493.3	[M+H]+	Lipids_Glycerophospholipids	LysoPC 16:1 (2n isomer)	494.3278, 184.0722, 236.1468, 476.3104, 124.9981, 86.0958	56400000	4.69965e+06	6920000	834745	2.44333e+06	80138.8	25700000	4.74412e+06		45300000	5.51785e+06	2.95667e+07	2.95334e+06	18300000	3.4938e+06	2.55333e+07	4.86233e+06
520.3	502.3	8.36	1	519.3	[M+H]+	Lipids_Glycerophospholipids	LysoPC 18:2	520.34, 184.0744, 104.1072, 502.3283, 86.0967, 337.2733	1.52667e+08	1.24989e+07	7.19333e+07	2.6234e+06	3.16333e+07	2.02868e+06	43300000	4.33667e+06		5.73667e+07	2.8004e+06	6.04333e+07	8.14916e+06	6.69333e+07	6.672e+06	5.74667e+07	4.33769e+06
518.3	459.6	8.74	1	517.3	[M+H]+	Lipids_Glycerophospholipids	LysoPC 18:3	518.3256, 184.0782, 104.1102, 500.3134, 258.1111, 86.0972	1.09667e+07	579272	6.89333e+06	828828	10300000	163299	1.83667e+07	3.06413e+06		14100000	1.63299e+06	1.06133e+07	1.81962e+06	1.61333e+07	2.77168e+06	2.49333e+07	5.17709e+06
496.3	478.3	8.74	1	495.3	[M+H]+	Lipids_Glycerophospholipids	LysoPC 16:0	496.34155, 184.0752, 104.1087, 478.3305, 313.2749, 86.0973	1.79333e+06	103387	957333	108472	1310000	29439.2	2340000	339509		4860000	967574	3100000	623592	3.27667e+06	659309	4910000	1.27216e+06
480.5	339.9	8.8	1	479.5	[M+H]+	Lipids_Glycerophospholipids	LysoPE 18:1 (2n isomer)	478.1, 281.2	19000000	2.41661e+06	1.08067e+07	1.54448e+06	8160000	1.10384e+06	1.20667e+07	2.02375e+06		17100000	3.16333e+06	2.05333e+07	2.81109e+06	1.99333e+07	5.8642e+06	1.39333e+07	1.15854e+06
522.4	184.5	8.86	1	521.4	[M+H]+	Lipids_Glycerophospholipids	LysoPC 18:1 (2n isomer)	522.36277, 184.0736	2.29667e+06	202868	931667	38964.4	277667	19362	690667	31030.5		1.62333e+06	505063	1270000	129615	1.81667e+06	414112	1.90333e+06	330084
440.1	422.7	6.71	1	439.1	[M+H]+	Lipids_Glycerophospholipids	LysoPC 12:1	440.1	NA	NA	8436.67	675.886	13500	1061.45	29833.3	7544.24		NA	NA	NA	NA	17266.7	2094.97	23800	4546.06
492.3	184.5	7.29	1	491.3	[M+H]+	Lipids_Glycerophospholipids	LysoPC 16:2 (2n isomer)	492.3, 184	9.85667e+06	526899	3.25333e+06	464495	734000	55160.4	1.15967e+07	1.87528e+06		18700000	3.39706e+06	1.64333e+07	1.85712e+06	5.26667e+06	1.02158e+06	5.06667e+06	1.27105e+06
426.3	285.8	7.63	1	425.3	[M+H]+	Lipids_Glycerophospholipids	LysoPE 14:0	426.25216, 285.2433, 254.2473, 365.2093, 62.0598	227333	27182.5	168667	17745.1	178000	2449.49	607667	37187.2		127000	6480.74	129267	23383.9	246333	35178.9	296667	39969.4
518.2	500.3	7.67	1	517.2	[M+H]+	Lipids_Glycerophospholipids	LysoPC 18:3 (2n isomer)	518.3256, 184.0782, 104.1102, 500.3134, 258.1111, 86.0972	1860000	289943	277000	21771.5	96333.3	1271.05	1.15967e+06	198612		1120000	82865.4	816000	61746.8	229667	65321.4	342333	85605
468.1	450.5	7.68	1	467.1	[M+H]+	Lipids_Glycerophospholipids	LysoPC 14:0	468.30753, 184.0726, 104.1073, 285.2534, 450.2988, 339.2902	1.20333e+06	28674.4	619333	87347.3	879000	26419.7	1970000	94163		653333	136375	549333	97755.9	1.72667e+06	320555	1.59667e+06	444997
520	125	8.19	1	519	[M+H]+	Lipids_Glycerophospholipids	LysoPC 18:2 (2n isomer)	520.34081, 184.0744, 104.1075, 502.3294, 124.9991, 86.0967	1.08667e+06	20548	331667	26449.1	120000	9273.62	440333	44850.4		591333	75535.1	551000	52656.1	426000	95257.5	450333	49815.2
478.6	337.9	8.32	1	477.6	[M+H]+	Lipids_Glycerophospholipids	LysoPE 18:2 (2n isomer)	478.29388, 337.2836, 306.2806, 263.2385, 81.0705	2.14333e+07	805536	1.90667e+07	1.4522e+06	9.10333e+06	108730	6810000	299333		1.33333e+07	817856	1.34333e+07	1.15566e+06	1.34667e+07	1.51731e+06	8340000	975944
454.2	314	8.68	1	453.2	[M+H]+	Lipids_Glycerophospholipids	LysoPE 16:0	452, 255.3	30800000	3.44093e+06	4.42333e+07	4.23425e+06	3.90333e+07	4.97349e+06	4.83333e+07	8.37549e+06		1.15767e+08	1.37856e+07	8.88667e+07	1.63871e+07	79200000	1.12845e+07	9.37667e+07	8.87856e+06
522.1	125.5	9.04	1	521.1	[M+H]+	Lipids_Glycerophospholipids	LysoPC 18:1	522.35801, 258.1108, 184.0741, 104.1072, 504.3458, 339.2921	2.22333e+07	1.65193e+06	1.01033e+07	506645	3.64333e+06	290440	7.75333e+06	368088		1.12833e+07	2.48741e+06	10000000	1.58316e+06	1.84333e+07	3.86552e+06	17500000	2.54689e+06
482.1	341.9	9.8	1	481.1	[M+H]+	Lipids_Glycerophospholipids	LysoPE 18:0	482.1, 341.7	200000	40898.2	482667	57133.4	386333	63772.2	543333	139772		852333	55727.5	544667	38964.4	453000	22686.3	506667	83115.7
291	273.9	6.65	1	290	[M+H]+	Lipids_Fatty acids	4-oxo-9Z,11Z,13E,15E-octadecatetraenoic acid	291, 190.9	471333	91914.2	164333	13572.8	42700	2060.74	7703	5474.83		60866.7	11266.9	66400	7747.26	80433.3	11517	13166.7	1844.51
279.3	201.5	8.91	1	278.3	[M+H]+	Free fatty acids	Punicic acid	279.3, 95.1	20800000	5.03057e+06	3.79667e+06	1.0418e+06	2.63667e+06	139603	2.42367e+06	1.14167e+06		6.79667e+06	2.54417e+06	3300000	567803	1.00767e+07	399694	5.73667e+06	1.68547e+06
355.1	337.9	10.45	1	354.1	[M+H]+	Glycerol ester	MAG (18:2)	355.1, 263.3	1.66667e+07	2.30988e+06	8220000	1.44888e+06	1.11767e+07	1.90572e+06	6.80667e+06	383174		4.69333e+06	782404	4.56667e+06	839616	1.02767e+07	2.59739e+06	8.38333e+06	1.01775e+06
265.1	177.5	2.44	1	264.1	[M+H]+	Phenolamines	N'-Feruloyl putrescine	265.1, 177.5	1.60667e+06	87305.3	2.01667e+06	304010	1840000	668730	1579000	462027		2090000	702329	2.89667e+06	632947	2.81667e+06	69442.2	7.51333e+06	1.0665e+06
265.1	177.5	2.44	1	264.1	[M+H]+	Phenolamines	N-Feruloyl putrescine	265.1, 177.1	2.27333e+06	166600	3150000	651511	2.96333e+06	1.10171e+06	2320000	630925		2.21333e+06	619372	3150000	374967	4.12667e+06	67986.9	7.81333e+06	1.10648e+06
235.1	118.4	0.77	1	234.1	[M+H]+	Amino acids and derivatives	Lysine butyrate	235.1, 118.3	190667	25381.5	457000	30474	766333	187407	327000	16673.3		524667	33993.5	546667	52772	222333	25420.9	524333	57110
366.2	203.5	0.81	1	365.2	[M+H]+	Nucleotides and derivatives	iP7G	366.2, 204.1	186000	19442.2	299000	3559.03	293333	35780.2	219333	19703.4		98566.7	16656.6	55066.7	1613.14	121233	24503.9	152000	7788.88
348.2	136.4	1.14	1	347.2	[M+H]+	Nucleotides and derivatives	Adenosine 5'-monophosphate	346, 134	4560000	1.08207e+06	2.36667e+07	3.38657e+06	2.06333e+07	1.31993e+06	3.19333e+07	2.10132e+06		6720000	721711	1.29333e+07	1.97709e+06	1.36333e+07	1.57551e+06	5410000	715868
118	58.2	2.47	1	117	[M+H]+	Plumerane	Indole	118.05665, 58.0682, 59.0753, 91.0559, 117.0574, 65.042	1.41667e+07	249444	1.65333e+07	1.12645e+06	2.40667e+07	339935	3.81333e+07	2.9044e+06		19400000	7.4552e+06	8670000	1.76308e+06	2.02333e+07	1.40554e+06	3.91667e+07	449691
339.1	177.5	3.21	1	338.1	[M+H]+	Coumarins	O-Feruloyl 2-hydroxylcoumarin	339.1, 145.4	NA	NA	NA	NA	NA	NA	NA	NA		NA	NA	176667	46600	416333	8178.56	578667	36572.6
448.1	215.7	4.12	1	447.1	[M+H]+	Amino acids and derivatives	L-Glutaminyl-L-valyl-L-valyl-L-cysteine	448.1, 163.5	395667	36627.3	955000	121724	210667	19871.8	561000	70270.9		692667	132389	220667	29488.2	208667	9977.75	2.34333e+06	291471
457.2	191.5	4.51	1	456.2	[M+H]+	Others	8-Methyl-2-oxo-4-phenyl-2H-chromen-7-yl 4-(hexyloxy)benzoate	457.2	5472.67	7726.79	6772.67	9565.27	13372.7	18899.1	38936.3	27620.6		261333	21452.8	181667	8956.69	185667	16438.4	202333	29488.2
351	259.9	7.75	1	350	[M+H]+	Glycerol ester	MAG (18:4) isomer3	351, 146.9	534000	121499	71903	51382.8	NA	NA	NA	NA		142267	31005.5	51833.3	21166.7	66966.7	16499.4	47133.3	9103.97
353.3	335.8	8.55	1	352.3	[M+H]+	Glycerol ester	MAG (18:3) isomer3	353.3, 261.4	5880000	2.98891e+06	5200000	310591	13870000	4.47904e+06	8.57333e+06	788515		5.78333e+06	1.54061e+06	3.00333e+06	293182	2.19667e+06	187320	3.45667e+06	77603
534.4	262.9	9.15	1	533.4	[M+H]+	Glycerol ester	MGMG (18:2) isomer1	534.4	628000	169601	1180000	113431	3540000	1.29092e+06	463667	32107.5		2.35667e+06	439874	1.37667e+06	193620	1.20667e+06	97410.9	1.02867e+06	215206
279.2	149.4	9.64	1	278.2	[M+H]+	Lipids_Fatty acids	Octadeca-11E,13E,15Z-trienoic acid	279.2, 149.4	2950000	388930	3210000	110454	3500000	402078	3.00333e+06	324277		3860000	509313	2.95333e+06	194822	4.09667e+06	460821	4.67333e+06	625797
353.1	173.7	9.85	1	352.1	[M+H]+	Glycerol ester	MAG (18:3) isomer4	353.1, 335.1	315000	71614.7	76333.3	12225.7	65200	18975.8	103000	12337.2		81366.7	6833.41	57566.7	8142.21	32800	5571.95	55700	7799.15
474.2	327.8	2.42	1	473.2	[M+H]+	Amides	10-Formyl-THF	474.2, 327	12600000	697615	15800000	432049	21200000	1.37356e+06	31400000	1.58955e+06		15900000	1.06145e+06	1.74333e+07	1.05304e+06	25300000	778888	2.54333e+07	1.30213e+06
343.1	240.9	6.53	1	342.1	[M+H]+	Amides	Cocamidopropyl betaine	343.28519, 240.2317, 183.173, 343.2779, 109.103, 239.496	1040000	165269	983333	70395.7	1110000	8164.97	1.38667e+06	257207		511667	48561.5	784000	124475	1070000	304066	990667	6599.66
538.1	184.5	6.87	1	537.1	[M+H]+	Lipids_Glycerophospholipids	LysoPC 19:0	538.1, 184.4	78733.3	11557.5	27666.7	6115.19	12333.3	2163.84	14593.3	3718.79		46233.3	12088.7	35200	4744.12	101233	22965.2	46666.7	5498.08
694.1	335.8	7.53	1	693.1	[M+H]+	Glycerol ester	DGMG (18:1)	694.1	1550000	587253	1.20667e+06	18856.2	2.54333e+06	522579	2.36333e+06	237954		1.75333e+06	582886	515000	110426	581000	160532	693667	34344.7
480.1	184.5	7.66	1	479.1	[M+H]+	Lipids_Glycerophospholipids	LysoPC 15:1	480.29825, 337.2756, 339.2814, 306.2795, 263.2372, 109.1009	106000	22196.1	26166.7	6351.03	17766.7	1452.2	13233.3	1161.42		16503	12122.7	27100	2857.74	20600	1651.26	13160	3615.41
482.3	184.5	8.2	1	481.3	[M+H]+	Lipids_Glycerophospholipids	LysoPC 15:0	482.32295, 184.074, 104.1072, 464.3294, 299.2583, 258.1053	1.26333e+06	81785.6	960000	123494	1.03667e+06	37712.4	875333	109804		1.27667e+06	115566	1.43333e+06	176320	874667	180334	592667	177633
353.1	261.8	8.33	1	352.1	[M+H]+	Glycerol ester	MAG (18:3) isomer2	353.1, 261.8	1.21833e+06	297891	442000	64812.6	1276000	284989	2.16667e+06	37712.4		1.65667e+06	456168	760333	39347.5	508333	72499.8	902333	50992.4
357.2	339.9	8.69	1	356.2	[M+H]+	Glycerol ester	MAG (18:1) isomer1	357.2, 265.3	1.55667e+06	256298	315000	22226.1	419000	28083.2	194000	7483.31		410667	41249.9	407333	34451.3	1.03733e+06	185848	786667	90779.3
534.1	338	8.99	1	533.1	[M+H]+	Glycerol ester	MGMG (18:2) isomer2	534.1	227000	68736.2	179667	7760.3	525333	173525	182333	11085.5		669000	102023	466000	9273.62	314667	56275.1	322000	7483.31
524.1	507.4	8.84	1	523.1	[M+H]+	Lipids_Glycerophospholipids	LysoPC 18:0 (2n isomer)	524.37236, 184.079, 104.1096, 506.3638, 341.3068, 258.1109	4.02667e+06	381255	1.51333e+06	71336.4	451000	31123.4	1.16667e+06	32998.3		2.41333e+06	695909	2.07333e+06	251705	3.08667e+06	801554	3.16667e+06	540144
510.1	510.4	9.29	1	509.1	[M+H]+	Lipids_Glycerophospholipids	LysoPC 17:0	510.36414, 401.2906, 313.274, 239.2386, 331.2868, 383.2809	379333	59645.2	493667	72784.3	745667	119667	968333	148670		3.33333e+06	419709	2.09333e+06	420819	1.26333e+06	192931	1.11367e+06	429364
353.2	261.8	10	1	352.2	[M+H]+	Glycerol ester	MAG (18:3) isomer1	353.2, 261.3	97200000	2.01216e+07	9130000	751132	4920000	919710	3.44333e+06	232713		6.30333e+06	516161	3900000	251396	2.47333e+06	492770	5520000	708661
197	135.1	0.7	1	198	[M-H]-	Phenolic acids	4-Hydroxy-3-methoxymandelate	197, 153	92400	12427.7	90466.7	9757.5	116000	3559.03	98033.3	9370.28		75100	7031.83	65333.3	3830.87	49133.3	4686.39	59333.3	5926.96
213.1	78.9	0.97	1	214.1	[M-H]-	Nucleotides and derivatives	2-Deoxyribose 1-phosphate	213.1, 97	145667	42593.7	278333	34567.2	99600	22454.1	42666.7	12595.3		NA	NA	NA	NA	85600	9993	70133.3	5986.84
190.1	84	2.43	1	191.1	[M-H]-	Amino acids and derivatives	N-Acetylmethionine	190.1, 84	603667	86703.8	674000	83741.7	627333	9977.75	1.28667e+06	110252		132000	25152.9	113000	10033.3	238333	14055.4	391667	37703.5
593.1	549.4	3.49	1	594.1	[M-H]-	Flavanols	Gallocatechin-catechin	593.1, 285.6	61433.3	9890.85	273333	55631.7	330667	27353.7	660667	208502		47500	4060.38	53466.7	7684.33	40200	4216.63	56766.7	7544.24
245	203.2	3.83	1	246	[M-H]-	Amino acids and derivatives	Acetyl tryptophan	245, 203.2	1.01567e+06	38594.8	923333	18372.7	375333	34120.7	641667	176247		219667	21514.9	181000	9797.96	271000	16573.1	360333	34721.1
207.1	192.1	5.49	1	208.1	[M-H]-	Hydroxycinnamoyl derivatives	3,4-Dimethoxycinnamic acid	207.1, 133.1	NA	NA	81333.3	20266.3	65900	7761.87	110300	30074.7		25400	8556.09	25333.3	4205.02	39500	1512.17	26000	2453.57
199	181.3	9.62	1	200	[M-H]-	Free fatty acids	Lauric acid (C12:0)	199, 181	70166.7	6681.48	68100	4451.97	49600	3921.73	37200	3466.99		52100	6619.67	54900	5426.48	67233.3	10989.2	58766.7	6295.68
225	207.2	10	1	226	[M-H]-	Free fatty acids	Myristoleic acid (C14:1)	225, 207	18466.7	385.861	11100	141.421	10120	626.578	8390	2606.18		23000	4082.48	19700	1336.66	37166.7	7151.85	20766.7	1961.86
649.1	503.3	0.74	1	650.1	[M-H]-	Saccharides and Alcohols	D(+)-Melezitose O-rhamnoside	649.1, 145	156367	57774.9	260000	12192.9	347333	59578.1	461000	104922		70800	27064.4	44366.7	4891.72	119000	13441.2	45466.7	6624.37
460.1	118.2	0.74	1	461.1	[M-H]-	Phenolic acids	Anthranilate O-hexosyl-O-hexoside	460.1, 117.9	995333	29009.6	1.62333e+06	80138.8	3560000	211187	5.74667e+06	605989		2.82667e+06	497013	1.74333e+06	63421	5.17333e+06	160485	4.35667e+06	551745
289.1	191.2	0.69	1	290.1	[M-H]-	Organic acids	Argininosuccinate	289.1, 97.1	361667	20806	387667	46147.1	195333	9285.59	229667	24567.4		125000	4320.49	130000	4546.06	94233.3	6540.3	34600	1451.44
328.1	134.2	1.84	1	329.1	[M-H]-	Nucleotides and derivatives	Cyclic AMP	328.1, 134.2	1.40667e+06	118977	872667	60785.6	592667	65996.6	345333	42240.1		309000	78029.9	339000	115991	656333	37703.5	197333	44462.2
295	183.3	8.92	1	296	[M-H]-	Lipids_Fatty acids	9,10-EODE	295, 277.3	8.21667e+06	2.0059e+06	2110000	589406	1400000	151217	1.24233e+06	634569		1.22533e+06	324536	767667	172094	3.01333e+06	123648	1.81667e+06	461471
293	275.4	8.37	1	294	[M-H]-	Free fatty acids	9-HOTrE	293, 275	228667	34198.8	52666.7	8336.8	48033.3	3425.72	13446.7	5857.45		199333	32561.1	170667	25772.5	421000	40718.5	111967	24144.1
293.2	249.9	9.12	1	294.2	[M-H]-	Free fatty acids	9-KODE	293.2, 275.1	101567	23804.2	45866.7	11222.7	27733.3	1442.99	34233.3	9681.71		31933.3	2969.1	29733.3	3564.95	123000	11775.7	137333	7363.57
309.1	291.4	7.5	1	310.1	[M-H]-	Free fatty acids	9-HpOTrE	309.1, 209.1	86066.7	16055.4	42766.7	6123.91	31333.3	4899.21	26900	3341.66		49366.7	10901.5	42000	4618.08	81700	15753.7	42100	2913.19
293	193.2	7.77	1	294	[M-H]-	Free fatty acids	13-HOTrE(r)	293, 193.1	103533	16179.3	90666.7	17221.9	96633.3	22917.3	112167	23861.9		58100	18634.6	61366.7	20247.9	84566.7	22255.2	89500	11434.2
177	145.2	5.43	1	178	[M-H]-	Phenolic acids	4-Methoxycinnamic acid	177, 145	4520000	731619	521333	219536	72366.7	13503.2	NA	NA		1288000	301587	788333	361573	208000	38496.8	19700	3581.43
295	277.5	9.7	1	296	[M-H]-	Lipids_Fatty acids	12,13-EODE	295, 195.2	75666.7	15469.8	24633.3	4541.9	31066.7	3429.61	102000	59486.7		20100	4767.25	14000	1336.66	113133	16801.9	76533.3	1510.7
311.1	293.4	7.82	1	312.1	[M-H]-	Free fatty acids	13-HPODE	311.1, 171.3	777667	226518	290000	99973.3	126367	46316.3	46866.7	14386.6		91833.3	24383.4	84300	27698.7	160600	45854	56833.3	12535.4
665.1	323.4	2.23	1	666.1	[M-H]-	Phenolic acids	O-Caffeoyl maltotriose	665.1, 218.1	41533.3	2828.82	31533.3	4899.21	73700	7645.91	352000	50338.9		18000	4172.13	22066.7	5225.79	69300	4414.37	130900	35998.4
147	85	0.92	1	148	[M-H]-	Organic acids	Citramalate	147, 87.1	3.15333e+06	371154	1.37667e+06	38586.1	1.87333e+06	116714	3430000	92736.2		1.06967e+06	180226	1660000	104243	2160000	99331.1	2760000	137356
181.1	151.1	4.02	1	182.1	[M-H]-	Phenolic acids	Syringaldehyde	181.1, 166	58833.3	11590.3	77400	9865.43	24466.7	6818.76	NA	NA		492667	68177.9	471333	25837.1	207000	23508.9	93200	47041.3
307	145.2	0.73	1	308	[M-H]-	Amino acids and derivatives	L-Glutamine O-hexside	307, 145	946333	422871	854333	113126	303333	39347.5	553667	9463.38		21136.3	15011.4	18900	4737.79	7072.67	9989.53	40000	1416.57
308.1	128.2	0.72	1	309.1	[M-H]-	Amino acids and derivatives	L-Glutamic acid O-glucoside	308.1, 146.1	303333	116723	248000	32954.5	46339.3	65521	167000	3265.99		18766.7	776.03	12750	3194.53	3539.33	4992.65	8206	11592.3
315.1	152.1	1.9	1	316.1	[M-H]-	Benzoic acid derivatives	2,5-dihydroxy benzoic acid O-hexside	315.1, 153	3.68667e+06	126842	3790000	298105	1.50667e+06	61824.1	1480000	194422		4.72333e+06	1.15312e+06	3860000	81649.7	2580000	225536	2.64667e+06	184451
214.1	134.2	3.69	1	215.1	[M-H]-	Amino acids and derivatives	3-(2-Naphthyl)-D-alanine	214.1, 134	443667	43713.7	1059000	660713	905000	431988	464333	68955.7		283000	29698.5	371667	19482.2	411333	16977.1	386000	44751.2
565.1	323.3	1.12	1	566.1	[M-H]-	Nucleotides and derivatives	Uridine 5'-diphospho-D-glucose	565.04842, 323.0286, 384.9823, 241.0119, 320.9752	5.87667e+06	271334	1.02667e+07	188562	5.61667e+06	426641	4590000	345640		2500000	146969	3020000	112250	3.05667e+06	391095	1.82333e+06	49888.8
331	313.7	2.09	1	332	[M-H]-	Phenolic acids	Gallic acid O-Hexoside	331, 313.1	19833.3	2774.09	88633.3	10603.6	65433.3	10930.8	47100	14396.5		185367	67707.2	185333	54628	181333	19601.6	202667	33469.7
311.1	149.2	2.19	1	312.1	[M-H]-	Phenolic acids	Caftaric acid	311.04118, 179.038, 135.0495, 149.0112, 87.0099	21033.3	1970.34	27333.3	7014.43	30733.3	1744.2	42966.7	2254.38		189667	942.809	176000	13638.2	142333	3399.35	134333	4642.8
353.1	191.2	2.91	1	354.1	[M-H]-	Phenolic acids	4-O-Caffeoyl quinic acid (criptochlorogenic acid)	353.1	357667	24567.4	128667	38352.2	74400	6977.58	61466.7	7819.78		813000	107396	658667	14383.6	522000	27178.4	367333	10530.4
385.1	223.2	3.15	1	386.1	[M-H]-	Phenolic acids	1-O-beta-D-Glucopyranosyl sinapate	385.1, 205	36000	18506.9	6.82333e+06	1.18576e+06	8680000	804529	51600000	2.46577e+06		366667	227405	454000	220641	623667	88627.8	6010000	1.21029e+06
771.1	609.5	2.53	1	772.1	[M-H]-	Flavones	Luteolin O-hexosyl-O-hexosyl-O-hexoside	771.1, 609.3	NA	NA	NA	NA	54166.7	10989.2	53366.7	11930.4		29066.7	1586.05	30800	979.796	31900	3150.66	49333.3	2286.68
489.1	285.3	2.89	1	490.1	[M-H]-	Anthocyanidins	Cyanidin O-acetylhexoside	489.1	NA	NA	NA	NA	9020	975.944	83300	20631.2		12736.3	9285.43	12120	2597.85	2996	4224.26	20733.3	834
547.1	503.4	2.87	1	548.1	[M-H]-	Anthocyanidins	Peonidin O-malonylhexoside	547.1	NA	NA	NA	NA	NA	NA	NA	NA		60533.3	4784.23	66300	8151.48	87700	4526.22	181000	18184.2
477.1	357.3	3.44	1	478.1	[M-H]-	Flavanones	Hesperetin O-Glucuronic acid	477.1, 357.1	12100	1606.24	28433.3	7459.37	17666.7	3511.25	35633.3	3913.51		NA	NA	24733.3	946.338	27333.3	6895.57	72500	7813.24
755.1	311.4	3.64	1	756.1	[M-H]-	C-glycosylated flavones	Chrysoeriol C-pentosyl-O-hexosyl-O-hexoside	755.1, 447.2	37300	9374.79	59366.7	16249.8	105033	37584.8	132900	36382.5		1690000	163095	387333	102844	462667	84009.3	914667	91131.2
549.2	387.3	3.99	1	550.2	[M-H]-	Flavanones	Hesperetin O-malonylhexoside	549.2, 387.1	51333.3	4151.57	49700	7552.92	NA	NA	NA	NA		220333	24444.9	142667	21013.2	33733.3	4834.83	18403	13015.7
739.1	431.4	4.17	1	740.1	[M-H]-	C-glycosylated flavones	Apigenin C-hexosyl-O-rutinoside	739.1, 563.2	257333	35462	84633.3	12382.9	12169.7	8633.8	NA	NA		44233.3	15391.8	NA	NA	NA	NA	NA	NA
487.1	283.2	2.57	1	488.1	[M-H]-	Flavones	Acacetin O-acetyl hexoside	487.1, 163	NA	NA	946333	27194.8	2280000	333567	7130000	994082		945333	63405.2	972333	112114	867333	27010.3	1220000	80415.6
503.1	341.3	3.94	1	504.1	[M-H]-	Flavones	Chrysoeriol O-acetylhexoside	503.1, 341.1	18533.3	1855.32	96466.7	5465.85	122000	8602.33	57566.7	14993.6		93233.3	22537.4	73233.3	12499.2	14272.7	20171.9	44969.7	32238.7
461.1	460.9	4.23	1	462.1	[M-H]-	Flavones	Chrysoeriol 7-O-hexoside	461.1, 299.2	NA	NA	12336.3	9660.31	NA	NA	NA	NA		NA	NA	9972.67	14090.8	14703	10954.4	132333	17987.7
519.1	315.3	4.28	1	520.1	[M-H]-	Flavonols	Isorhamnetin O-acetyl-hexoside	519.1, 314.2	1592.67	2239.64	10903	7734.42	18300	1790.72	4939.33	6972.54		2.00333e+06	185712	1011000	34650.6	457667	57978.9	693667	71257
449.1	329.3	3.3	1	450.1	[M-H]-	Flavanones	Eriodictyol C-hexoside	449.1, 287	3.89667e+06	319409	1.56667e+06	247970	1.64133e+06	871438	2.20333e+06	114698		3.60667e+06	413629	3.67333e+06	44969.1	3.31333e+06	649324	1.20167e+07	1.99847e+06
447.1	327.3	3.37	1	448.1	[M-H]-	Flavones	Luteolin C-hexoside	447.1, 327.1	252333	115257	870667	224895	1069000	340859	1085000	253086		2.94333e+07	4.10718e+06	7.80667e+06	2.01338e+06	7.16333e+06	1.28832e+06	1.38667e+07	3.57056e+06
505.1	301.2	3.91	1	506.1	[M-H]-	Flavonols	Quercetin O-acetylhexoside	505.1, 301.2	NA	NA	4006	5652.61	NA	NA	NA	NA		850667	160375	580333	100241	275667	86341.7	459333	36808.8
535	329.4	3.68	1	536	[M-H]-	Flavones	Tricin O-sinapic acid	535, 491.3	NA	NA	48466.7	5319.98	93166.7	4660	111167	20421.9		1.07333e+06	170163	1270000	98994.9	946000	246391	712667	152391
521.1	329.3	3.74	1	522.1	[M-H]-	Flavones	Tricin O-saccharic acid	521.1, 329.2	4.17333e+06	388702	2.31333e+06	872251	376333	73286.3	163333	73965.5		2.06333e+06	187853	5.73667e+06	517966	2330000	311234	1090000	64807.4
355.1	181.2	1.93	1	356.1	[M-H]-	Phenolic acids	Homovanilloyl quinic acid	355.1, 121.1	NA	NA	12569.7	10084.7	NA	NA	NA	NA		94733.3	14104.7	145333	25315.8	137333	5312.46	79633.3	8008.47
499.1	163.2	2.18	1	500.1	[M-H]-	Phenolic acids	5-O-p-coumaroyl quinic acid O-hexoside	499.1, 163.1	NA	NA	NA	NA	35800	5219.83	29533.3	7087.23		39566.7	4289.78	37033.3	4394.19	102567	16569.9	113667	7133.64
481.1	445.4	2.52	1	482.1	[M-H]-	Phenolic acids	5-O-p-coumaroyl shikimic acid O-hexoside	481.1, 319.2	19306	27290.1	NA	NA	NA	NA	321000	41984.1		102300	28210.8	135167	35637.8	87700	7992.91	148333	22425.2
337.1	155.8	2.84	1	338.1	[M-H]-	Phenolic acids	1-O-p-Coumaroyl quinic acid	337.1, 173.1	NA	NA	NA	NA	NA	NA	6606	9329.57		351333	78792.3	794333	159435	552000	77101.7	331000	34708.3
481.1	319.3	3.13	1	482.1	[M-H]-	Phenolic acids	3-O-p-coumaroyl shikimic acid O-hexoside	481.1, 319.3	533667	45987.9	267667	44902.4	244333	31051.9	182333	33290		165333	40876.5	130000	7483.31	79466.7	11195.3	53266.7	9522.02
709.1	401.3	3.43	1	710.1	[M-H]-	Phenolic acids	O-p-Coumaroyl quinic acid O-rutinoside derivative	709.1	4.36333e+06	169771	157433	65550.3	36900	11410.8	11436.3	8085.4		1.47333e+06	20548	1310000	272886	200333	74069	119067	34844.5
337.1	190.9	3.46	1	338.1	[M-H]-	Phenolic acids	3-O-p-Coumaroyl quinic acid	337.1, 191.1	NA	NA	186333	4109.61	69800	21668.4	48066.7	10229.8		1780000	451737	2800000	112250	1680000	141657	572000	73011.4
319	145.3	3.97	1	320	[M-H]-	Phenolic acids	3-O-p-Coumaroyl shikimic acid	319, 145.1	222333	4988.88	28833.3	5576.34	9156.67	2445.14	NA	NA		NA	NA	NA	NA	NA	NA	NA	NA
289.1	97	1.09	1	290.1	[M-H]-	Saccharides and Alcohols	Glucarate O-Phosphoric acid	289.1, 97	7.60667e+06	569581	1.12433e+07	1.18424e+06	1.16333e+07	492161	10300000	244949		3470000	63770.4	4.57667e+06	362614	2.86333e+06	98770.2	5.19333e+06	487602
421.1	241.2	0.69	1	422.1	[M-H]-	Saccharides and Alcohols	Trehalose 6-phosphate	421.07817, 241.0134, 78.9595, 223.0029, 96.9702	96100	2006.66	98933.3	8132.79	83633.3	8920.89	82300	6086.6		77966.7	1461.35	60666.7	15003.4	77033.3	3145.72	66200	1296.15
153	78.9	1.61	1	154	[M-H]-	Organic acids	Diethyl phosphate	153.03239, 78.9599, 124.9996, 96.9715, 80.0602, 81.0461	558667	70357.8	569667	110406	503667	40835.7	516000	15641.8		917333	407825	865667	324968	508667	18926.8	589333	32602
175.1	131.3	2.74	1	176.1	[M-H]-	Organic acids	2-Isopropylmalate	175.0611, 115.0386, 85.0654, 113.0602, 59.014	6190000	610792	2430000	88317.6	5330000	1.11268e+06	7.45667e+06	707358		3.45667e+06	514868	3130000	131403	5230000	96263.5	4.27333e+06	385775
359.1	197.1	2.34	1	360.1	[M-H]-	Phenolic acids	Syringic acid O-glucoside	359.1, 182.1	29433.3	7267.43	2.00333e+06	371424	953667	422745	400333	247797		239667	128225	107033	12162.9	99266.7	17235.9	90600	14012.1
167	152.1	3.29	1	168	[M-H]-	Phenolic acids	Vanillic acid	167.03644, 152.0123, 108.0233, 91.019, 123.0446, 65.0032	80733.3	6127.71	392667	21234.1	324667	7363.57	127667	8993.83		373667	60422.6	533667	89488.7	535333	55643.7	291667	39465.9
478.1	281.4	8.99	1	479.1	[M-H]-	Lipids_Glycerophospholipids	LysoPE 18:1	478.1, 281.3	657000	67901.9	1360000	211818	1.29233e+06	220524	1330000	160624		855000	138984	1.06933e+06	89223.8	2.07333e+06	175182	1570000	120277
329.1	314.3	5.86	1	330.1	[M-H]-	Flavonols	Di-O-methylquercetin	329.1, 229.1	131867	52333.9	69133.3	23675.9	32200	8853.25	42466.7	24160.3		NA	NA	NA	NA	4956.33	4005.76	9603	6854.37
362.1	211.1	1.15	1	363.1	[M-H]-	Nucleotides and derivatives	Guanosine 5'-monophosphate	362.1, 79.1	47633.3	14987.2	147000	36110.9	154333	1247.22	224667	29769.5		106000	2160.25	95566.7	3445.13	96066.7	5657.64	76566.7	12685
277.1	233.7	10.56	1	278.1	[M-H]-	Free fatty acids	α-Linolenic acid	277.21744, 259.206, 59.0134, 275.2017, 233.2266, 182.132	62033.3	11015.2	NA	NA	NA	NA	NA	NA		33400	6491.53	31800	12980.2	46900	5115.34	36233.3	987.702
333.1	137	0.67	1	332.1	[M+H]+	Nucleotides and derivatives	2'-Deoxyinosine-5'-monophosphate	333.052, 137.05	459333	59331.5	792000	130877	1.51267e+06	407661	1.29667e+06	174420		2.96333e+06	1.1362e+06	2370000	143062	13100000	653197	1.20667e+07	402768
167.1	121	1.96	1	166.1	[M+H]+	Nucleotides and derivatives	6-Methylmercaptopurine	167.1, 121.1	9.61333e+06	815285	10500000	374166	1.22667e+07	694422	3.02667e+07	1.57973e+06		1.80333e+07	3.82303e+06	8.08667e+06	553554	10550000	872735	2.27333e+07	1.5107e+06
400.2	136.1	2.05	1	399.2	[M+H]+	Nucleotides and derivatives	Adenosine O-ribose	400.2, 136.11	1310000	115181	1.32667e+06	118977	1.54667e+06	12472.2	3300000	349094		2.22333e+06	147045	1940000	74833.1	2080000	74833.1	2.67667e+06	100775
384.1	252.2	2.19	1	383.1	[M+H]+	Nucleotides and derivatives	Succinyladenosine	384.11616, 252.0747, 234.0629, 162.0774, 136.0627, 206.0682	12400000	NA	14200000	1.10454e+06	2.63667e+07	3.78183e+06	4.41667e+07	4.75067e+06		1.20267e+07	2.4169e+06	9130000	2.60854e+06	1.89667e+07	2.01384e+06	3.57333e+07	3.94152e+06
133.1	105	4.16	1	132.1	[M+H]+	Plumerane	4-Aminoindole	133.1, 105.1	351000	35693.1	382667	68994.4	366000	6164.41	270667	8379.87		337333	62055.5	393333	40499.7	480333	16048.5	414333	60960.8
544.4	544.4	8.89	1	543.4	[M+H]+	Lipids_Glycerophospholipids	LysoPC 20:4	544.4, 485.2	1.19333e+07	1.13235e+06	4500000	416653	1.40667e+06	91772.7	3.82667e+06	265623		4.45333e+06	561090	4.07333e+06	457335	7.75667e+06	1.87237e+06	8560000	1.53291e+06
299.1	74.8	6.74	1	300.1	[M-H]-	Flavanone	4'-Hydroxy-5,7-dimethoxyflavanone	299.1, 223.1	27566.7	3100.9	52966.7	3198.26	66266.7	2577.25	63300	2979.93		5406	7632.51	16833.3	124.722	34433.3	6074.17	36000	7471.28
203	112	0.6	1	202	[M+H]+	Phenolamines	Spermine	203.22368, 112.1126, 84.0816, 129.1384, 58.0656, 72.081	2.76333e+06	309444	3.81667e+06	405326	5.00667e+06	360123	5810000	57154.8		5830000	416653	6410000	63770.4	5.74333e+06	95684.7	5.24333e+06	155849
266	134.2	1.88	1	267	[M-H]-	Nucleotides and derivatives	Adenosine	266, 134	1.82333e+07	1.7442e+06	1.06233e+07	624838	7.12667e+06	915436	4400000	457019		3.78667e+06	1.00014e+06	3630000	1.0082e+06	7600000	690362	2300000	511143
468.3	450.5	7.5	1	467.3	[M+H]+	Lipids_Glycerophospholipids	LysoPC 14:0 (2n isomer)	468.3, 184	699000	127062	172667	8576.45	83700	6451.87	2.23667e+06	582027		408667	78018.5	207000	28612.4	510000	41960.3	1396000	297711
496.3	478.3	8.57	1	495.3	[M+H]+	Lipids_Glycerophospholipids	LysoPC 16:0 (2n isomer)	496.34031, 184.0747, 104.1079, 478.3299, 313.2744, 86.0967	38300000	3.11555e+06	8.93333e+06	420264	2440000	80415.6	1.33367e+07	2.57022e+06		2.34667e+07	6.48194e+06	9890000	1.15709e+06	16700000	3.6037e+06	1.28333e+07	1.83727e+06
524.4	507.4	9.69	1	523.4	[M+H]+	Lipids_Glycerophospholipids	LysoPC 18:0	524.37244, 184.0783, 104.1099, 506.3615, 258.1103, 341.3051	1081000	444982	471000	62631.2	189000	11313.7	921667	85558.3		1600000	417692	899667	263262	1.41067e+06	526448	1.84867e+06	921103
550.4	245.1	9.81	1	549.4	[M+H]+	Lipids_Glycerophospholipids	LysoPC 20:1 (2n isomer)	550.37, 184	1.22433e+06	170697	161333	22866.8	68233.3	3756.18	271000	56017.9		506667	117179	276667	55631.7	222000	91546	266000	117084
550.4	245.1	9.9	1	549.4	[M+H]+	Lipids_Glycerophospholipids	LysoPC 20:1	550.38672, 184.0727, 532.3882, 124.9994, 258.1073, 289.1974	1.77333e+06	240740	NA	NA	NA	NA	NA	NA		748000	134167	442333	54591.4	446667	85371.1	390336	305185
424.2	285.8	7.37	1	425.2	[M-H]-	Lipids_Glycerophospholipids	LysoPE 14:0 (2n isomer)	424.2, 227.2	NA	NA	NA	NA	NA	NA	22250	8864.82		NA	NA	NA	NA	11000	637.704	12793.3	2231.91
452.3	255.3	8.55	1	453.3	[M-H]-	Lipids_Glycerophospholipids	LysoPE 16:0 (2n isomer)	452.3, 255.2	13000000	1.41657e+06	2.02333e+07	1.94822e+06	17300000	1.7282e+06	20400000	3.07354e+06		3.22333e+07	3.10305e+06	31000000	3.35956e+06	2.94667e+07	6.18457e+06	33600000	3.23213e+06
609.2	301.3	4.03	1	610.19	[M-H]-	Flavanones	Hesperetin 7-O-neohesperidoside (Neohesperidin)	609.2, 301	NA	NA	NA	NA	NA	NA	41033.3	4179.58		138670	105896	398667	62291.4	1005000	58246.6	3700000	364783
190.1	84	0.83	1	189.111	[M+H]+	Amino acids and derivatives	L-Homocitrulline	188.1, 145	870333	170744	3.62667e+06	384390	9.72333e+06	505063	3.35667e+06	357056		1145000	402458	1.34667e+06	130979	1.01567e+06	41684	946667	82661.3
121	121	1.42	1	120.044	[M+H]+	Nucleotides and derivatives	Purine	119.03689, 92.025, 65.0143, 67.0292, 90.0097, 68.0247	416333	32520.1	949000	55359.4	548667	164317	926000	249437		3040000	763806	8.37333e+06	735089	6170000	748331	1.26333e+06	102089
116.1	70	0.79	1	115.063	[M+H]+	Amino acids and derivatives	L-Proline	114.1, 86	1150000	94163	2.47333e+06	111455	1.13867e+06	227076	4610000	359258		1.24767e+06	476184	1.13067e+06	113494	2.78667e+06	108730	8.71333e+06	260427
174.1	131.1	0.72	1	175.096	[M-H]-	Amino acids and derivatives	L-Citrulline	174.1, 131.1	1800000	151217	1.15667e+06	60184.9	402000	19096.2	229000	49254.4		355333	39835.8	229000	13140.3	272333	16213.8	98100	4181.71
104	73.9	0.72	1	105.043	[M-H]-	Amino acids and derivatives	L-Serine	104, 73.7	247000	28083.2	809000	87570.9	1.85667e+06	169771	3030000	57154.8		336333	47751.7	325667	6944.22	467333	16110.7	1.37333e+06	124989
132	99.9	0.71	1	133.037	[M-H]-	Amino acids and derivatives	L-Aspartic acid	132.03069, 88.0402, 71.0124, 87.7705, 115.0036, 72.0099	9900000	1.41244e+06	15100000	355903	12300000	616441	3.83667e+07	3.04448e+06		4.11333e+06	493986	5170000	303425	7.03333e+06	464495	11900000	1.47196e+06
146.1	102.1	0.72	1	147.053	[M-H]-	Amino acids and derivatives	L-Glutamic acid	146.1, 102	7.53333e+06	191369	12200000	734847	9.46667e+06	1.0818e+06	1.42333e+07	518545		9.15667e+06	820420	9020000	669677	10280000	311127	1.12333e+07	418994
130.1	130.1	1.24	1	131.095	[M-H]-	Amino acids and derivatives	L-Leucine	130.1, 84	405333	79083.6	1008000	39302.2	1.57667e+06	144299	870000	80199.8		743667	92697.8	1.02333e+06	59066.8	688000	29405.2	1.27333e+06	88065.6
166	120.1	1.99	1	165.079	[M+H]+	Amino acids and derivatives	L-Phenylalanine	164.1, 103	2.03667e+06	176320	2.25333e+06	90308.1	2.75333e+06	201550	6.36667e+06	391606		4.12333e+06	578177	1.90667e+06	139124	2.44333e+06	198718	5.07333e+06	412014
120	73.9	0.81	1	119.058	[M+H]+	Amino acids and derivatives	L-Threonine	118, 73.9	8.12667e+06	1.58009e+06	17400000	725718	2.00667e+07	1.0274e+06	2.52667e+07	590668		7980000	1.02101e+06	9950000	327516	1.20333e+07	449691	14600000	989949
147	83.2	0.68	1	146.106	[M+H]+	Amino acids and derivatives	L-(+)-Lysine	147, 84	158667	24716.2	334000	17568.9	533000	34215	427000	23338.1		800000	120717	629000	46783.2	498667	17632	713000	7257.18
182.1	136.1	1.13	1	181.074	[M+H]+	Amino acids and derivatives	L-(-)-Tyrosine	180.1, 119.3	4.52667e+06	424290	13500000	909212	1.79667e+07	825967	14800000	355903		1.62333e+07	4.32229e+06	5.36333e+06	783170	10900000	216025	1.48667e+07	997775
127	110	1.56	1	126.043	[M+H]+	Nucleotides and derivatives	Thymine	127.05064, 110.0249, 54.0343, 84.0448, 109.0402, 56.0503	2.97333e+06	1.1452e+06	1102000	123645	375000	51075.1	181667	38732.7		2.39667e+06	830836	1.49667e+06	67986.9	155000	43566	59169.7	41857.3
137	110	1.13	1	136.038	[M+H]+	Nucleotides and derivatives	Hypoxanthine	135, 92	233333	8178.56	382333	17632	477333	19567.5	1.20533e+06	264052		300000	62551.3	177000	17663.5	337333	11085.5	1.24933e+06	343862
154.1	92.9	0.7	1	155.07	[M-H]-	Amino acids and derivatives	L-Histidine	154.1, 137	128000	10801.2	376333	19482.2	615667	52854.1	2.12333e+06	168589		831667	18372.7	492667	28778.9	703333	7586.54	1.38667e+06	30912.1
112	95	0.75	1	111.043	[M+H]+	Nucleotides and derivatives	Cytosine	110, 67	2.10667e+06	265623	1.55333e+06	105304	1440000	209921	1.32667e+06	112645		1.20667e+06	239768	1050000	43204.9	1.44667e+06	89938.3	942000	70370.4
118.1	71.8	0.84	1	117.079	[M+H]+	Amino acids and derivatives	L-Valine	116, 100	9.65667e+06	1.40562e+06	2.35667e+07	623610	3.52333e+07	3.04448e+06	2.89333e+07	612826		15700000	927362	1.90333e+07	776030	1.66333e+07	776030	31700000	1.13431e+06
136.1	136.1	1.12	1	135.054	[M+H]+	Nucleotides and derivatives	Adenine	134.1, 107	62600000	8.814e+06	3.54667e+07	3.23557e+06	1.35333e+07	1.55849e+06	8.47667e+06	314572		3.84667e+07	5.64525e+06	3.68667e+07	1.37194e+06	3.84333e+07	579272	11400000	653197
132	85.9	1.23	1	131.095	[M+H]+	Amino acids and derivatives	L-Isoleucine	130.1, 82	8090000	1.16713e+06	1.67667e+07	205480	2.22667e+07	573488	15600000	141421		2.11667e+07	895669	1.73667e+07	518545	13400000	0	23000000	748331
173.1	131.1	0.71	1	174.112	[M-H]-	Amino acids and derivatives	L-(+)-Arginine	173.1, 131.1	547000	50576.7	705333	64012.2	1021000	84746.7	1.67667e+06	388616		3.42667e+06	196016	1.66667e+06	189795	1660000	144453	2.21333e+06	70395.7
203	116.1	2.47	1	204.09	[M-H]-	Amino acids and derivatives	L-Tryptophan	203.08364, 116.0514, 142.0659, 74.026, 72.0087, 159.0927	1690000	64807.4	2.44667e+06	82192.2	3.49333e+06	196016	5.44667e+06	415238		4.57333e+06	1.20339e+06	1460000	200167	2970000	134907	6580000	128323
145.1	101	2.63	1	146.058	[M-H]-	Amino acid derivatives	2,3-dimethylsuccinic acid	145.1, 101	3.13667e+06	111156	1.84333e+06	98092.9	1180000	65319.7	910000	173966		2110000	129615	2.47333e+06	4714.05	2110000	137356	1.30667e+06	159652
136	89.9	0.81	1	135.035	[M+H]+	Amino acids and derivatives	DL-homocysteine	136, 118.1	530667	30728.2	2430000	45460.6	2.28667e+06	162138	1.70667e+06	30912.1		2.84667e+06	330690	2650000	77888.8	4420000	356931	2.51667e+06	140554
116.1	73.9	0.69	1	117.054	[M-H]-	Amides	Guanidineacetic acid	116.1, 74	5816.67	1567.79	6903.33	1679.93	7056.67	1949.98	10766.7	758.654		27766.7	2948.82	13533.3	1037.09	20366.7	946.338	19800	2083.27
188.1	102	1.16	1	189.064	[M-H]-	Amino acids and derivatives	N-Acetyl-L-glutamic acid	188.05671, 102.0561, 114.0558, 98.0249, 128.0351	193667	16131.4	167333	19014.6	93066.7	6629.4	161667	5249.34		229667	23893.3	140000	23537.2	280333	5312.46	119000	12754.1
287.1	287.1	5	1	286.1	[M+H]+	Flavones	Luteolin	285, 151	NA	NA	NA	NA	NA	NA	21272.7	30071.4		1.18067e+06	229029	184000	39824.6	170667	27932.5	266333	31041.2
447.3	284.1	2.55	1	448.3	[M-H]-	Anthocyanidins	Cyanidin 3-O-glucoside (Kuromanin)	449.1, 287.3	47800	804.156	63766.7	4644.95	67166.7	1796.91	73600	7926.33		48433.3	3472.11	27600	2513.96	40866.7	5797.89	55200	2438.58
126.1	126.1	1.13	1	125.059	[M+H]+	Nucleotides and derivatives	5-Methylcytosine	126.06673, 109.041, 108.056, 83.0613, 81.0452	1600000	254689	1.72333e+06	57348.8	2230000	82865.4	3710000	180185		3.30667e+06	238374	2580000	184029	3.01333e+06	167398	3.70667e+06	246351
251.3	84	1.12	1	250.062	[M+H]+	Amino acids and derivatives	γ-Glu-Cys	248.88136, 96.9603, 128.0336, 168.8951, 171.081	287000	73611.6	184933	71699.4	195000	27652.6	639667	66243.7		133667	18372.7	146000	19510.7	142333	7039.57	143500	50798.6
118.2	101	0.8	1	117.079	[M+H]+	Organic acids	5-Aminovaleric acid	118.08602, 101.0595, 56.05, 59.05, 83.0485	164667	8730.53	175333	19482.2	119333	17556.3	142333	2867.44		222333	8379.87	199333	30684.8	246000	40232.7	266333	7586.54
189.2	84	1.02	1	188.116	[M+H]+	Amino acids and derivatives	N6-Acetyl-L-lysine	187.2, 145	4440000	700904	1.51667e+07	2.39768e+06	42800000	1.2083e+06	1.09667e+07	205480		1.51333e+07	5.00289e+06	8120000	1.07892e+06	5280000	481456	3110000	404063
173.2	116.1	0.79	1	172.085	[M+H]+	Amino acids and derivatives	Glycyl-L-proline	171.2, 114	83600	11595.1	101033	15864.1	134667	8259.67	161333	9030.81		72733.3	9524.12	68600	8679.09	63500	14030.2	41166.7	5894.82
159.2	88	0.75	1	160.085	[M-H]-	Amino acids and derivatives	D-Alanyl-D-Alanine	159.0775158, 88.0413, 115.086, 98.0565, 70.0304	1602.67	2253.79	1586	2230.21	11226.7	3528.56	37466.7	5262.66		14266.7	2778.89	12666.7	1302.13	15233.3	1297.01	19266.7	1078.06
279.3	147.1	2.44	1	280.106	[M-H]-	Amino acids and derivatives	Asp-phe	279.3, 164	127667	13912.4	76533.3	9490.46	113667	11614.2	136000	2160.25		138667	15456	109433	16540.1	102600	3490.94	158000	14445.3
187.2	127.1	1.17	1	188.08	[M-H]-	Amino acids and derivatives	Nα-Acetyl-L-glutamine	187.07345, 58.0294, 125.0717, 127.0497, 145.0603	243667	12657.9	329000	21276	285667	6847.55	308000	17795.1		420333	65035	322667	29329.5	403333	20499.3	412667	18979.5
115	115.1	1.19	1	114.043	[M+H]+	Nucleotides and derivatives	Dihydrouracil	115, 98.2	507667	23113.2	142667	23156.5	112733	16525	72966.7	13486.1		545000	143257	466333	93271.4	231333	14055.4	23872.7	33748.3
118.1	101	0.74	1	119.058	[M-H]-	Amino acids and derivatives	L-Homoserine	118.1, 72	113667	13123.3	228667	28986.6	368000	36724.2	937667	131971		206667	13300	177333	3091.21	182000	9416.3	302667	27402.4
335.1	122.8	0.79	1	334.057	[M+H]+	Nucleotides and derivatives	β-Nicotinamide mononucleotide	335.06551, 123.0553, 97.0289, 80.0492, 122.682	3.52667e+06	383174	7.31667e+06	626330	8030000	506820	3.37333e+06	614510		1770000	245357	3570000	492544	6090000	213542	994667	102883
263.1	189	3.78	1	264.111	[M-H]-	Amino acids and derivatives	N-γ-Acetyl-N-2-Formyl-5-methoxykynurenamine	263.1, 204	NA	NA	9036.33	6477.76	44900	5601.79	398000	39064		NA	NA	NA	NA	NA	NA	94566.7	15876.7
167.1	110	1.98	1	166.049	[M+H]+	Nucleotides and derivatives	1-Methylxanthine	165.1, 108	65166.7	4784.93	131333	20499.3	127333	20499.3	101933	5441.41		82233.3	7936.97	77033.3	7445.06	48766.7	4308.39	48600	4205.55
217.1	158.1	1.12	1	216.122	[M+H]+	Amino acids and derivatives	Nα-Acetyl-L-arginine	215.1, 173	1177000	204853	1.97667e+06	421294	3230000	282843	4.47667e+06	969341		3.41333e+06	549687	2.98667e+06	344222	2.15667e+06	412822	1394000	307363
132.1	72.8	1.29	1	131.058	[M+H]+	Amino acids and derivatives	N-Propionylglycine	130.05135, 74.0234, 55.0162, 84.0437, 86.0608, 74.8001	3.33667e+06	603122	6750000	313794	9840000	109848	7.45333e+06	651375		8190000	196469	6580000	58878.4	5.45667e+06	414756	9.81333e+06	422795
170.1	124.1	0.72	1	169.085	[M+H]+	Amino acids and derivatives	1-Methylhistidine	168.1, 151.1	7.95667e+06	594886	8.80333e+06	114407	1.08667e+07	524934	1.65333e+07	1.38884e+06		7.24667e+06	1.05547e+06	6.44667e+06	444997	1.23333e+07	601849	1.71667e+07	659966
152.1	135.1	0.85	1	151.049	[M+H]+	Nucleotides and derivatives	2-Hydroxy-6-aminopurine	150.1, 107	1.71667e+06	335095	1.73667e+06	103387	1690000	163299	3.13333e+06	351979		748667	140581	800000	109493	1.31333e+06	129701	3.88667e+06	483207
189.1	86	1.92	1	188.116	[M+H]+	Amino acids and derivatives	N-Glycyl-L-leucine	187.1, 130	3420000	253903	1980000	63770.4	2.31667e+06	135974	2.63333e+06	86538.4		1.56667e+06	214528	1.58333e+06	119536	1990000	225536	898667	51227.2
287	287	5.69	1	286.048	[M+H]+	Flavonols	Kaempferol	285.04161, 229.0525, 185.062, 239.0371, 257.049, 151.0031	NA	NA	21436.3	15681.2	44866.7	2777.69	80133.3	9292.41		NA	NA	29036.3	21037.5	72200	6450.32	88133.3	10529.4
611.2	303	3.56	1	610.153	[M+H]+	Flavonols	Quercetin 3-O-rutinoside (Rutin)	609.153, 301	131733	43942.5	139400	64151.3	127333	19905.3	59533.3	7792.45		1.51333e+07	2.98478e+06	4.68667e+06	725825	2.68667e+06	592077	11110000	1.12021e+06
131.1	71.8	0.73	1	132.054	[M-H]-	Amino acids and derivatives	L-Asparagine	131.054, 114	839333	143855	3.22333e+06	180801	2.76667e+06	102089	7.53333e+06	639809		2.75333e+06	217613	2.45667e+06	59066.8	4.82333e+06	162138	1.26333e+07	169967
183.1	137.1	4.63	1	182.058	[M+H]+	Organic acids	Ethyl 3,4-Dihydroxybenzoate (Ethyl protocatechuate)	183.0579, 137	439667	24783.5	523333	20038.9	374333	63162.9	321000	184711		263000	33256.6	445667	76111	528667	25197	109167	17465.8
113	94.9	2.24	1	112.016	[M+H]+	Organic acids	2–furanoic acid	111.016, 67	532333	40892.8	432333	29488.2	427667	40958	336000	54461		322667	17932	358667	88890.7	323667	26948.5	457667	53754.6
121	77	4.53	1	122.037	[M-H]-	Phenolic acids	Benzoic acid	121.0368, 77	309333	31030.5	357000	15641.8	735667	46204.9	443000	49806.3		386667	63120.7	380667	44131.1	535667	9877.02	493667	46592.8
131	86.9	1.9	1	132.042	[M-H]-	Organic acids	Glutaric acid	131.0423, 87	287333	35724.3	320000	8041.56	193667	5436.5	499333	253293		252667	14659.1	197333	24689.2	307000	18384.8	173667	942.809
145.1	80.9	2.63	1	146.058	[M-H]-	Organic acids	Adipic acid	145.05036, 83.0498, 101.0608, 81.0344, 145.0484, 127.0394	3.68333e+06	75865.4	2.15667e+06	88065.6	1.36333e+06	98432.2	1072000	185781		2.47667e+06	143836	2910000	74833.1	2490000	176824	1.53333e+06	175563
130.1	128	0.74	1	131.058	[M-H]-	Amino acids and derivatives	trans-4-Hydroxy-L-proline	130.058, 84	41800	5027.92	44666.7	6151.6	34400	3216.62	12063.3	2937.35		40433.3	339.935	30433.3	4553.63	49400	5265.61	33200	7088.02
187.1	125.1	4.43	1	188.105	[M-H]-	Organic acids	Azelaic Acid	187.16827, 125.0972, 97.0648, 123.0804, 169.0846, 57.0335	3140000	304740	2210000	160624	1.53667e+06	193448	2000000	226421		2050000	955301	1590000	330757	1.36233e+06	408294	961000	39606.4
172.1	130	3.41	1	173.105	[M-H]-	Amino acids and derivatives	N-Acetyl-l-leucine	172.105, 130	1.21767e+07	1.62186e+06	5310000	306268	3260000	237908	5.30667e+06	265999		7.70667e+06	1.02516e+06	5.62667e+06	309228	9420000	704131	6800000	947523
113	95.9	1.19	1	112.027	[M+H]+	Nucleotides and derivatives	Uracil	111.027, 80	34100000	648074	1.35333e+07	1.67398e+06	7.16333e+06	1.2995e+06	3060000	230362		3470000	1.19507e+06	5170000	1.45079e+06	13900000	864099	1620000	590085
259.1	126.7	1.78	1	258.085	[M+H]+	Nucleotides and derivatives	5-Methyluridine	257.07944, 124.0407, 125.0366, 167.0481, 154.0525, 96.0457	309000	23423.6	228667	19601.6	153333	25090.9	134667	15326.1		121667	7930.25	135667	6599.66	117667	10077.5	59566.7	7527.87
243.1	127.1	2.08	1	242.09	[M+H]+	Nucleotides and derivatives	Thymidine	243.09669, 127.0504, 110.0231, 117.056, 99.0443, 73.0285	916667	66939.4	582333	23228.3	343000	53235.3	223333	31478.4		218667	33559.2	316333	18263.5	327667	37276.7	119333	11585.4
203.1	93	4.84	1	202.12	[M+H]+	Organic acids	Sebacate	201.11537, 139.1138, 183.103, 137.0972, 57.0343, 111.0808	1.01267e+06	201741	1.16333e+06	110252	1.82667e+06	196016	1370000	88317.6		NA	NA	102673	145188	434000	68716.8	278670	197286
131	86.9	2.08	1	132.042	[M-H]-	Organic acids	2-Methylsuccinic acid	131.03503, 87.0454, 69.0348, 113.0245, 98.0015, 86.7784	11000000	326599	5.42333e+06	457335	5650000	403567	1.69333e+06	208220		15500000	804156	1.62667e+07	94280.9	1.40333e+07	94280.9	7100000	424343
117	98.9	1.26	1	116.011	[M+H]+	Organic acids	Maleic acid	115.011, 71	878333	57563.5	1.35667e+06	26246.7	728000	101863	2.38667e+06	168589		1.73733e+06	590797	892333	44969.1	1.65667e+06	123918	4.26333e+06	265121
132.1	76.9	1	1	131.095	[M+H]+	Organic acids	6-Aminocaproic acid	132.10172, 69.0706, 79.0546, 55.0549, 73.0654, 114.0934	409333	82693.5	979667	43866	1.48667e+06	106562	947667	38792.9		943667	308731	916333	5557.78	663667	15326.1	1550000	128323
191.1	127.7	0.73	1	190.095	[M+H]+	Amino acid derivatives	2,6-Diaminooimelic acid	189.095, 171	801667	69877.7	1950000	134412	5.77333e+06	228376	7.93333e+06	588350		767000	316058	1.47467e+06	445590	1.79333e+06	74087	629667	111572
146.1	85.9	0.77	1	145.085	[M+H]+	Organic acids	4-Guanidinobutyric acid	144.085, 102	5.51333e+06	461616	5.67333e+06	91772.7	1.06333e+07	329983	2.01333e+07	1.72111e+06		12100000	909212	14000000	668331	1.64667e+07	984322	17400000	424264
151.1	78.8	5.92	1	150.068	[M+H]+	Phenolic acids	4-Ethylbenzoic acid	149.06161, 105.071, 80.0275, 108.0206, 121.0688, 93.0344	NA	NA	NA	NA	NA	NA	NA	NA		1034000	65564.2	1037000	46669	799000	69512.6	836333	83866.3
160.1	114.1	3.03	1	159.126	[M+H]+	Organic acids	Dl-2-Aminooctanoic acid	158.12013, 110.0993	284000	39047	407667	7408.7	917667	87614.1	1.60333e+06	83798.7		593333	17594.2	854333	56664.7	914667	47373.2	3.51333e+06	82192.2
179.1	123	4.53	1	178.063	[M+H]+	Phenolic acids	Coniferylaldehyde	179.1	2150000	177951	7.13333e+06	666150	3050000	353648	1043000	139372		3.07667e+06	453823	5.66667e+06	292727	4.46667e+06	274388	2.63667e+06	190671
193.1	134.1	4.03	1	194.058	[M-H]-	Phenolic acids	Ferulic acid	193.04139, 134.0423, 178.0289, 133.03, 137.0251	38703	27386.4	1480000	283314	768333	191298	607333	93081.8		462000	48989.8	690667	71932.1	615667	44813.2	311667	62633
579.2	271.1	4.02	1	578.164	[M+H]+	Flavones	Apigenin 7-O-neohesperidoside (Rhoifolin)	577.164, 269	323000	43825.4	63466.7	9876.68	16872.7	23848.8	12939.3	18286.3		9206	13006.5	NA	NA	NA	NA	NA	NA
433.1	313.1	3.75	1	432.106	[M+H]+	Flavones	Apigenin 5-O-glucoside	433.106, 271.01	1.80333e+06	332098	1.28667e+06	327652	1.59333e+06	422874	2.17333e+06	118134		1.56667e+06	54365	457667	87305.3	365333	50743.4	1339000	262276
301.1	286.1	5.73	1	300.063	[M+H]+	Flavones	Chrysoeriol	299.063, 284.01	NA	NA	NA	NA	NA	NA	NA	NA		326667	44100.9	94066.7	33277.2	60066.7	11805.7	485333	48472.2
579.2	271.1	3.96	1	578.164	[M+H]+	Flavones	Apigenin 7-rutinoside (Isorhoifolin)	577.164, 269.01	320333	63020.3	65900	3159.11	21069.7	15054.4	NA	NA		9972.67	14090.8	NA	NA	NA	NA	NA	NA
593.2	285.1	3.79	1	594.159	[M-H]-	Flavonols	Kaempferol 3-O-rutinoside (Nicotiflorin)	593.159, 285	884000	101413	598000	149481	423333	70740.5	2600000	296985		759333	80251	1.33333e+06	83798.7	894333	148361	7.06667e+06	1.07438e+06
435.1	273.1	4.17	1	434.121	[M+H]+	Flavanones	Naringenin 7-O-glucoside (Prunin)	433.121, 271	1130000	78740.1	180333	52753.1	130667	45762.7	2.75667e+06	247296		5.75667e+06	916309	3950000	323213	1.55333e+06	442895	1.90667e+07	2.68494e+06
431.1	431.1	3.7	1	432.106	[M-H]-	C-glycosylated flavones	Isovitexin	431.106, 311	25600000	1.15758e+06	2.05667e+07	4.55802e+06	1.71667e+07	5.62218e+06	1.82667e+07	1.72498e+06		1.61667e+06	32998.3	3.20333e+06	18856.2	2.52333e+06	132246	3.40333e+06	287557
273.1	153.1	5.6	1	272.068	[M+H]+	Flavanones	Naringenin	271.06249, 151.0036, 119.0503, 271.062, 107.014, 177.0204	NA	NA	NA	NA	39266.7	9431.27	985667	229890		33672.7	47607.6	NA	NA	147000	8286.54	1.94667e+06	263987
271.1	215.1	5.62	1	270.053	[M+H]+	Flavones	Apigenin	271.06048, 153.0186, 119.0489, 145.028, 229.049, 121.0284	2.95333e+06	1.29371e+06	521333	96803.4	295336	208853	330000	57913.7		443333	72371	NA	NA	244000	22627.4	541333	86434.3
183.1	137.1	3.25	1	182.058	[M+H]+	Phenolic acids	Homovanillic acid	181.058, 122	4.03667e+06	253026	6.44333e+06	306848	7.78333e+06	344513	1.15867e+07	1.51757e+06		134000	21276	214667	39835.8	236667	27390.2	34006	48079
173.1	92.9	0.94	1	174.053	[M-H]-	Organic acids	Shikimic acid	173.04485, 93.0348, 73.0296, 93.0287, 137.0266, 83.048	3.24667e+06	151731	1930000	208327	581333	41644	25772.7	36435.3		2.52333e+06	460821	1790000	206074	755000	85708.8	99100	22721.9
355.1	355.1	2.8	1	354.095	[M+H]+	Phenolic acids	Chlorogenic acid (3-O-Caffeoylquinic acid)	353.09001, 191.0634, 161.0251, 179.0359, 173.0465, 127.0396	3710000	1.93964e+06	770333	301824	1.15333e+06	354944	1.34333e+06	172111		19260000	1.05513e+07	2.28667e+07	5.52952e+06	10360000	2.08083e+06	1.14467e+07	5.13123e+06
197.1	122.9	3.38	1	198.053	[M-H]-	Phenolic acids	Syringic acid	197.04688, 123.0104, 167, 182.0244, 95.015, 121.0304	28333.3	4086.84	34433.3	4289.78	21366.7	903.081	4306	6076.88		51233.3	13053.3	52233.3	10114.1	91700	6326.66	79866.7	4921.61
151	136.1	3.97	1	152.047	[M-H]-	Phenolic acids	Vanillin	151.04079, 136.0176, 108.023, 92.0272, 95.0127, 79.0192	1.91667e+06	171529	3.68667e+06	293295	996667	81422.1	378667	68050.6		2990000	633140	5090000	242625	2.10333e+06	245809	410000	89342
167.1	149.1	3.57	1	166.063	[M+H]+	Phenolic acids	3-(4-Hydroxyphenyl)propionic acid	165.063, 119	483333	68665	452333	52664.6	760333	50677.6	541000	43366.7		558667	30771.6	408000	11518.1	471333	63897.5	386000	53347.9
195.1	149.1	4.02	1	194.058	[M+H]+	Phenolic acids	3-Hydroxy-4-methoxycinnamic acid	193.058, 134	38033.3	4437.97	612000	106220	354333	80607.4	228333	59252.8		197000	32403.7	289333	19686.4	324000	28890.6	153000	34842.5
175	158.1	1.13	1	174.1	[M+H]+	Amino acids and derivatives	L-Theanine	173.1, 84	5.70333e+06	225290	7.00333e+06	449914	9.63667e+06	601461	1.58333e+07	1.32749e+06		5.39333e+06	789486	4090000	313794	4.12667e+06	265497	3.48667e+06	177451
117	100	1.32	1	118.027	[M-H]-	Organic acids	Methylmalonic acid	117.01914, 99.9249, 55.0191, 73.0277, 116.9266, 55.9831	1.03333e+08	1.88562e+06	44600000	1.2083e+06	74500000	4.24814e+06	3.94667e+07	8.86842e+06		34200000	2.79404e+06	3.62333e+07	1.69967e+06	6.56667e+07	5.1803e+06	2.12333e+07	1.47271e+06
122	77.9	1.14	1	123	[M-H]-	Vitamins	Nicotinic acid	122, 78	4.68333e+06	221259	1.46333e+06	179134	1.24333e+06	153261	2.08333e+06	167597		2.67333e+06	470201	4260000	335361	8220000	1.00422e+06	4010000	898258
181	70.9	0.74	1	182.079	[M-H]-	Saccharides and Alcohols	D-Sorbitol	181.07309, 59.0145, 71.0139, 89.025, 101.0246, 73.0301	76166.7	7349.53	73700	3323.65	103767	8597.03	214000	39606.4		162000	33536.1	134667	11440.7	165667	12684.2	246000	16083.1
179.2	87	0.74	1	180.063	[M-H]-	Saccharides and Alcohols	Inositol	179.05709, 87.0091, 59.0139, 99.0076, 161.0461	1.80333e+06	47140.5	2910000	120830	3.14333e+06	238094	3.30333e+06	134247		2700000	290287	3.29667e+06	54365	1.81333e+06	57348.8	1.45667e+06	20548
341	58.8	0.78	1	342.116	[M-H]-	Saccharides and Alcohols	D-(+)-Sucrose	341, 119	7.37333e+06	852656	6090000	380263	1.00133e+07	1.28245e+06	12500000	1.70489e+06		9.64667e+06	1.60302e+06	5.41667e+06	293182	1.25667e+07	205480	9.77667e+06	1.48361e+06
195.2	75.1	0.7	1	196.058	[M-H]-	Saccharides and Alcohols	Gluconic acid	195.05268, 75.0091, 59.0136, 71.0136, 129.0185	1200000	8164.97	2050000	120830	4.89667e+06	591063	6.77333e+06	144299		2020000	107083	1.99333e+06	40276.8	2650000	29439.2	3.65333e+06	145220
160.1	116	4.32	1	161.048	[M-H]-	Plumerane	Indole-5-carboxylic acid	160.04107, 116.0519	70266.7	5956.14	43666.7	5558.38	16636.3	12001.5	43300	22563.7		59100	8918.89	30433.3	6321.57	26233.3	784.573	15903	12343.1
445.3	281	10.71	1	444.303	[M+H]+	Vitamins	Menaquinone (K2)	445.3, 341.3	1.52333e+06	215613	1150000	57154.8	1.10067e+06	176534	1.00133e+06	137466		808333	25525.6	550667	71060.2	779333	148127	1.09467e+06	201371
613.2	355.5	1.14	1	612.152	[M+H]+	Amino acids and derivatives	Glutathione oxidized	611.1446861, 306.0739, 272.0868, 338.0454, 304.0595, 254.0764	7.39333e+06	931570	9.20667e+06	1.1515e+06	4.91667e+06	559305	2230000	262805		4.67667e+06	181904	3.17333e+06	190146	3.13333e+06	187320	1.85667e+06	175182
243.1	110	1.19	1	244.07	[M-H]-	Nucleotides and derivatives	Uridine	243.06292, 110.0247, 82.029, 152.0362, 122.0233	2.08667e+07	1.668e+06	8.62333e+06	911494	4.58333e+06	512272	1620000	230362		1.92667e+06	435839	2600000	706305	6000000	802122	1.04933e+06	242124
308	162	1.13	1	307.084	[M+H]+	Amino acids and derivatives	Glutathione reduced form	306.07724, 143.0453, 128.0348, 160.0052, 210.0877, 179.0465	466333	39969.4	754333	317512	1.51033e+07	6.45384e+06	3.06667e+07	980929		228333	20531.8	173333	15151.1	260333	39668.1	3.29067e+06	4.20139e+06
152	135.1	1.15	1	151.049	[M+H]+	Nucleotides and derivatives	Guanine	150, 133	12290000	4.67442e+06	4660000	612536	1.53667e+06	352357	1.43467e+06	506745		6.90667e+06	1.83371e+06	4860000	379825	1524000	784920	551667	95009.9
269.1	137	0.8	1	268.081	[M+H]+	Nucleotides and derivatives	Inosine	267.1, 135	3660000	426693	1780000	29439.2	890333	43987.4	436000	67443.8		3710000	371573	3.87333e+06	12472.2	2.02333e+06	74087	574333	70433.6
169	122.8	1.75	1	170.022	[M-H]-	Phenolic acids	Gallic acid	169.022, 125	204667	39911	199667	111977	347000	34708.3	NA	NA		140000	15895.5	237333	17518.2	NA	NA	NA	NA
284.1	135.2	1.46	1	283.092	[M+H]+	Nucleotides and derivatives	Guanosine	282.092, 150	8.97333e+07	9.61954e+06	4.40667e+07	3.51125e+06	2.82333e+07	6.2195e+06	17300000	1.96129e+06		14600000	3.48807e+06	13780000	4.67926e+06	3.16667e+07	2.66375e+06	9.66667e+06	2.28959e+06
268.1	151.7	1.68	1	267.097	[M+H]+	Nucleotides and derivatives	Deoxyguanosine	266.097, 150	6.15333e+06	736176	1.79667e+06	61824.1	842333	106834	1.92333e+06	120370		850667	76460.6	743667	107146	1.34667e+06	73181.7	540333	90282.3
228	112	1.13	1	227.091	[M+H]+	Nucleotides and derivatives	Deoxycytidine	226, 93	2060000	300111	906667	62526.4	318333	12256.5	279333	31836.4		259333	14817.4	356333	16213.8	453667	28986.6	156333	21638.4
273.1	167.1	5.52	1	274.084	[M-H]-	Chalcones	Phloretin	273.0782, 167.0332, 123.0436, 119.0498, 125.0261, 189.0548	NA	NA	NA	NA	47066.7	9838.81	355667	99764.2		15850	8674.77	1726	2428.2	21133.3	2608.11	260000	22090.7
150	72.8	1.18	1	149.051	[M+H]+	Amino acids and derivatives	L-Methionine	150.0579, 56.0503, 61.0113, 104.0529, 122.0325, 72.9372	3.09333e+06	401857	6.69667e+06	816551	7430000	468828	1.38333e+07	1.59234e+06		5.64667e+06	255256	5.50333e+06	228813	4790000	88317.6	1.27333e+07	903081
124	77.8	1.21	1	123.032	[M+H]+	Organic acids	2-Picolinic acid	124.03, 106	5460000	29439.2	1.93333e+06	95684.7	1.68333e+06	182635	2.95667e+06	238374		2.77333e+06	689025	4.78333e+06	458427	13300000	1.25698e+06	5.42667e+06	1.51926e+06
219.1	144.1	1.47	1	220.085	[M-H]-	Amino acids and derivatives	5-Hydroxy-L-tryptophan	219.1, 144	NA	NA	6706	9470.99	26333.3	1701.63	30866.7	5638.75		92833.3	18292.5	14269.7	10110.6	55800	6696.77	83700	9413.11
322.4	176.1	1.23	1	321.1	[M+H]+	Amino acids and derivatives	S-(methyl)glutathione	320.4, 143	217667	33249.9	528667	65586.2	1.29333e+06	18856.2	1220000	71180.5		327333	27764.9	361000	26882.5	292000	36851.1	960000	84915.6
206.1	188.2	2.29	1	205.131	[M+H]+	Saccharides and Alcohols	Pantothenol	204.1241317, 71.0509, 99.0448, 102.056, 74.0611, 72.0446	682333	733824	29226.7	15828.4	69700	18184.2	87366.7	22100.1		6539.33	9235.29	23866.7	4275.77	31500	9513.15	60500	18496.1
167.1	124	1.86	1	166.049	[M+H]+	Nucleotides and derivatives	3-Methylxanthine	165.1, 150	725333	55259	1.78333e+06	270473	1.92333e+06	232713	1500000	198662		1.14667e+06	106562	1.13667e+06	99777.5	738000	30626.8	667667	98164.3
385	136.1	1.31	1	384.122	[M+H]+	Amino acids and derivatives	S-(5'-Adenosy)-L-homocysteine	383, 134	564000	99008.4	1230000	143527	541667	48787.5	503333	24499.4		NA	NA	157800	55057.1	181333	13695.1	116767	16230.9
167.1	122.1	2.26	1	168.042	[M-H]-	Phenolic acids	Homogentisic acid	167.1, 123	907667	268986	5910000	1.19518e+06	514333	69810.9	33536.3	26390.7		512000	103251	347000	51749.4	177333	22954.1	135333	23837.4
285.1	153.1	1.53	1	284.076	[M+H]+	Nucleotides and derivatives	Xanthosine	283.06922, 151.0273, 108.018, 222.989, 133.0175, 165.0425	7.27333e+07	7.09194e+06	3.38667e+07	1.30213e+06	2.28667e+07	3.70075e+06	1.34667e+07	1.75182e+06		1.21033e+07	4.62717e+06	9750000	3.50561e+06	2.30333e+07	2.17613e+06	7030000	1.79356e+06
250	134	1.25	1	249.04	[M+H]+	Vitamins	Pyridoxine 5'-phosphate	248, 79	206333	41907.3	250667	24580.9	110667	6128.26	41800	9950.21		180333	26637.5	216667	11953.6	193000	35898	340333	175009
300.1	168.1	1.48	1	299.087	[M+H]+	Nucleotides and derivatives	8-Hydroxyguanosine	298.08274, 208.049, 123.0166, 166.0364, 148.0033	392333	3399.35	225000	21740.9	173000	31874.8	61303	43966.8		463333	74396.8	294667	42303.1	352333	13021.3	253333	28522.9
128	126	1.15	1	129.079	[M-H]-	Amino acids and derivatives	L-Pipecolic acid	128, 82	145667	30346.2	204333	33954.2	83266.7	14288.1	280333	34922.1		121733	24822.2	150667	11556.6	136000	16573.1	113333	16357.1
308	112	1.25	1	307.057	[M+H]+	Nucleotides and derivatives	2'-Deoxycytidine-5'-monophosphate	306.05073, 78.959, 96.9699, 195.0075, 110.0356, 176.9946	1760000	494233	1240000	163095	607667	47443.5	603333	47161.7		1550000	220151	1.25333e+06	126579	963000	190433	1.05567e+06	278106
282.1	150.1	2.31	1	281.112	[M+H]+	Nucleotides and derivatives	1-Methyladenosine	280.10497, 148.0636, 133.0406, 132.0316, 146.0513, 106.0287	253667	41249.9	124467	22507.1	147000	31791	73633.3	2714.57		93866.7	9728.42	84900	12813.3	141667	15151.1	65333.3	9401.54
170.1	134.1	1.11	1	169.074	[M+H]+	Vitamins	Pyridoxine	168, 122	1.36333e+07	1.38884e+06	2.75667e+07	1.11455e+06	2.10667e+07	740870	1.80333e+07	2.07257e+06		4.34333e+06	491347	5.28333e+06	339248	1.43333e+07	1.01434e+06	1.14667e+07	4.71192e+06
145.1	127.1	0.74	1	146.069	[M-H]-	Amino acids and derivatives	L-Glutamine	145.069, 109	4.25667e+06	504469	7460000	376652	4.25667e+06	202704	8.25667e+06	705518		2.96667e+06	168193	3.57333e+06	153261	2.67333e+06	38586.1	1.32333e+06	67986.9
161.1	144.2	2.72	1	160.1	[M+H]+	Plumerane	L-Tryptamine	159.2, 129	NA	NA	NA	NA	NA	NA	NA	NA		5.48333e+06	1.24719e+06	6.04333e+06	526266	4.86333e+06	555538	2.17667e+06	143372
164	61	1.77	1	163	[M+H]+	Amino acids and derivatives	L-Methionine methyl ester	164.07388, 61.0115, 56.0501, 104.0539, 88.0396, 87.0266	948667	80900.5	587667	34922.1	532000	31379.4	1.23667e+06	122837		537667	62060.9	491333	25460.2	456000	9092.12	511000	57988.5
371.1	209.2	2.76	1	372.142	[M-H]-	Phenolic acids	Syringin	371.1353, 209.0817, 194.0616, 179.0382, 161.0276, 176.0436	111667	6649.98	293333	9568.47	345667	47842.3	1.63067e+06	1.22045e+06		167667	10780.6	137000	2828.43	55166.7	6342.62	151000	8524.47
163	119	3.83	1	164.047	[M-H]-	Phenolic acids	p-Coumaric acid	163.047, 119	1.93333e+07	5.59424e+06	3.24667e+06	591289	1146000	226786	429667	11813.4		2.26667e+06	623984	2350000	784984	978000	45985.5	319333	47119.2
229.1	135	4.59	1	228.079	[M+H]+	Stilbene	Resveratrol	227.07314, 185.062, 143.0513, 183.0822, 157.0667, 159.0818	NA	NA	NA	NA	NA	NA	NA	NA		215333	6944.22	338000	15253.4	613000	46925.5	615000	72677.4
298	135.1	2.85	1	297.09	[M+H]+	Nucleotides and derivatives	5'-Deoxy-5'-(methylthio)adenosine	296, 134	5190000	667882	4.87667e+06	198718	3380000	504050	2850000	1.08299e+06		897667	49995.6	1460000	88317.6	1.58667e+06	108730	1.00233e+06	13572.8
459	139.1	3.28	1	458.085	[M+H]+	Flavones	Epigallate catechin gallate (EGCG)	457.2, 169	NA	NA	NA	NA	NA	NA	NA	NA		32803	23752.5	16769.7	13923.4	51233.3	10826	275000	32619
315.1	300	7.17	1	314.079	[M+H]+	Flavonols	Kumatakenin	313.07389, 298.0549, 283.0309, 255.0309, 227.0348, 183.0444	NA	NA	NA	NA	NA	NA	NA	NA		73266.7	2451.3	27566.7	10140.5	31733.3	4054.08	34333.3	4561.68
433.1	287	4.9	1	432.106	[M+H]+	Flavonols	Kaempferol 7-O-rhamnoside	431.106, 285	NA	NA	NA	NA	NA	NA	NA	NA		295000	51852.4	565667	13474.3	880000	19510.7	1.06367e+06	156679
403.1	373.1	7.02	1	402.132	[M+H]+	Flavones	Nobiletin	403.132, 373	104833	10184.4	119333	8498.37	201333	25302.6	125333	7363.57		74733.3	15175.7	80200	1306.39	93066.7	8249.98	115333	5557.78
305.1	153	4.08	1	304.058	[M+H]+	Flavanones	Dihydroquercetin (Taxifolin)	303.058, 125	NA	NA	NA	NA	NA	NA	NA	NA		210333	22514.2	112133	13799.8	60133.3	5022.84	51600	3906.4
623.2	314	3.75	1	624.169	[M-H]-	Flavonols	Isorhamnetin 3-O-neohesperidoside	623.169, 314	10113.3	2960.6	13806.7	2755.86	15000	1608.31	10876.7	2485.91		289000	58657.2	552667	42695.3	369333	42820	753667	55240.9
373.1	373.1	7.5	1	372.121	[M+H]+	Flavonols	Tangeretin	373.121, 343	107000	1632.99	119000	4082.48	145667	2867.44	142000	2943.92		62500	6420.28	58466.7	5583.51	63133.3	8673.46	78800	7589.91
271.1	215.1	5.45	1	270.053	[M+H]+	Isoflavone	Genistein (4',5,7-Trihydroxyisoflavone)	271.06174, 215.0723, 153.0198, 243.0674, 253.0513, 149.0243	NA	NA	NA	NA	NA	NA	NA	NA		9.50333e+06	771679	1.41667e+07	821922	11600000	81649.7	6120000	446393
289.1	153.1	5.03	1	288.063	[M+H]+	Flavanones	Eriodictyol	287.05672, 135.049, 151.0064, 107.0144, 65.0036, 134.0374	NA	NA	NA	NA	NA	NA	1.19033e+06	571828		293333	42405.5	182000	34097.9	484667	49371.6	1.04733e+06	174826
417.1	255.1	3.52	1	416.111	[M+H]+	Isoflavones	Daidzein 7-O-glucoside (Daidzin)	417.111, 255	3.13667e+06	77172.2	5.57333e+06	414916	7.58667e+06	1.01995e+06	6640000	152534		37003	29537.1	85133.3	20833	135333	3399.35	43700	4574.57
463.1	301.1	3.81	1	464.132	[M-H]-	Flavanones	Hesperetin 5-O-glucoside	463.132, 301	780667	34470.6	2460000	353648	1.36333e+06	82596.7	1.84667e+06	173077		2.46667e+06	167398	1780000	438406	1.97667e+06	313298	1.11933e+07	1.42364e+06
417.1	270.9	4.84	1	416.111	[M+H]+	Flavones	Apigenin 4-O-rhamnoside	417.111, 271	3.26333e+06	411204	1.41667e+06	138884	1.03633e+06	142554	1080000	72571.8		NA	NA	NA	NA	NA	NA	NA	NA
595.2	287	3.83	1	594.159	[M+H]+	Flavonols	Kaempferol 3-O-robinobioside (Biorobin)	593.159, 285	1540000	144453	1.12867e+06	256252	1.00333e+06	109646	5.77333e+06	579214		3610000	351094	3060000	531099	1840000	332566	1.37333e+07	3.02692e+06
433.1	433	3.72	1	434.121	[M-H]-	C-glycosylated flavones	Isohemiphloin	433.11577, 313.0718, 343.0822, 119.0503, 193.0136, 271.06	882000	39370	875000	210506	664667	167589	1.79667e+06	62361		367000	25020	877667	63672.8	678667	166904	2.18667e+06	277649
179.1	146.1	3.86	1	180.079	[M-H]-	Phenolic acids	Coniferyl alcohol	179.0725, 146.0379, 164.0486, 135.0454, 147.0459, 163.0407	115100	56528.6	3.33667e+06	127105	1.23667e+06	24944.4	191000	30822.1		277000	111508	371333	40144.2	431667	80970.5	249667	49304
371.1	267.1	11.63	1	370.105	[M+H]+	Lignans	sesamolin	369.11, 193	2280000	319687	1.62667e+06	131993	1.72333e+06	424447	1.23667e+06	179134		1053000	87776.2	885667	53543.3	1.46067e+06	387575	2.46333e+06	398776
357.1	136.1	5.36	1	358.142	[M-H]-	Lignans	Pinoresinol	357.13549, 151.0407, 136.0166, 175.0768, 342.1103, 122.0373	240000	38944.4	3870000	287170	1.49333e+06	247162	46600	9516.3		136667	37330.4	330000	39598	138667	10208.9	27100	3539.3
593.2	431.1	3.19	1	594.159	[M-H]-	C-glycosylated flavones	Isovitexin 7-O-glucoside (Saponarin)	593.16, 311	636667	21853	753333	69307.7	933667	70144.3	693667	33479.7		190000	17907.2	75900	1416.57	63000	11538.9	78600	9543.93
477.2	258.1	2.25	1	476.168	[M+H]+	Vitamins	D-Pantothenic dcid	477.2	488333	98756.7	250000	65375.8	347333	90738.9	332000	93939.7		37700	8051.09	53233.3	8376.29	363000	157964	256533	122503
179.1	161.1	0.76	1	178.048	[M+H]+	Carbohydrates	D-(+)-Glucono-1,5-lactone	177.04485, 71.0153, 59.0158, 99.0124, 57.038	37833.3	13343.2	47900	10617.9	115167	17157.8	167667	17594.2		NA	NA	37433.3	2752.37	38600	7950.26	107067	14227
147.1	88	0.77	1	146.118	[M+H]+	Amides	Acetylcholine	147.12, 87.2	1.17667e+06	118977	1780000	155134	2600000	85244.7	3.59333e+06	415879		1320000	92736.2	3160000	315066	3.61667e+06	214838	4020000	388416
225.1	149.1	3.74	1	224.069	[M+H]+	Phenolic acids	Sinapic acid	223.06222, 193.0138, 149.024, 208.0395, 164.0468, 121.0288	175667	37747.7	130333	22573.3	145667	21669.2	74066.7	15585.1		76600	8445.51	53433.3	13425.4	72866.7	2828.82	67066.7	15334.6
138.1	78	3.69	1	137.048	[M+H]+	Pyridine alkaloids	Nicotinic Acid Methyl Ester (Methyl Nicotinate)	138.05604, 78.0384, 79.0452, 108.0451, 52.0249, 106.0292	4.98667e+07	4.1708e+06	3.47333e+07	3.88616e+06	9320000	816129	2.33667e+07	618241		6.34333e+06	839060	7.16667e+06	260427	1.16667e+07	449691	10090000	546687
117.1	99.9	2.09	1	118.063	[M-H]-	Organic acids	3-Hydroxy-3-methyl butyric acid	117.05579, 99.9247, 59.0132, 116.929	361667	23795.4	294667	39969.4	445333	27047.3	139333	23795.4		1.02433e+06	157557	702333	29578.5	661667	18571.2	276000	33176.3
277	84	0.77	1	276.132	[M+H]+	Amino acids and derivatives	L-Saccharopine	275, 257	959667	121327	1065000	108244	1063000	86166.5	1260000	120277		1.29667e+06	114698	915000	117867	882667	125396	970667	107087
137.1	77	6.2	1	136.052	[M+H]+	Phenolic acids	Methyl benzoate	137.0591, 77.0376, 91.0533, 105.0333, 59.0116, 51.0228	NA	NA	NA	NA	NA	NA	NA	NA		197000	16573.1	194667	15173.1	189333	18372.7	177667	13300
367	179.1	3.67	1	368.111	[M-H]-	Phenolic acids	Chlorogenic acid methyl ester	367.10372, 179.0383, 135.0462, 161.0242, 134.0373, 191.0555	203000	46676.2	1.03033e+06	235007	348333	74230.9	116200	35915.8		1.87567e+06	874592	6340000	1.73812e+06	6.23667e+06	288251	1830000	197990
153	108.1	2.57	1	154.027	[M-H]-	Benzoic acid derivatives	2,5-dihydroxybenzoic acid (Gentisic acid)	153, 108	548000	126383	351333	32273.1	223667	7586.54	242000	34322		630667	176749	505333	50228.4	331667	24004.6	302333	41104.2
353	191.1	2.58	1	354.095	[M-H]-	Phenolic acids	Neochlorogenic acid (5-O-Caffeoylquinic acid)	353.08893, 191.0566, 161.0232, 179.0331, 173.0447, 135.0416	NA	NA	236667	35197.9	218333	45168.8	633667	122726		5.27667e+06	3.34838e+06	12590000	5.32155e+06	9950000	1.84436e+06	1.23167e+07	6.18338e+06
153.1	109.1	2.55	1	154.027	[M-H]-	Phenolic acids	Protocatechuic acid	153.1, 109	2.46333e+06	673614	1640000	24494.9	672333	35910.4	765333	94911.7		2.20667e+06	559603	2.20333e+06	103387	910000	32751.6	685667	64251.2
118.1	118.1	0.78	1	117.079	[M+H]+	Amides	Betaine	118.08715, 58.0694, 59.0747, 70.0665, 56.0511	381667	110049	1.11867e+06	98065.7	1610000	232522	1310000	242625		684333	175184	1.24333e+06	91043.3	1.15733e+06	249374	1450000	8164.97
117	99.9	1.31	1	118.027	[M-H]-	Organic acids	Succinic acid	117.01931, 73.03, 99.0084, 55.0189	97500000	2.47521e+06	4.19667e+07	1.57551e+06	6.92667e+07	4.19947e+06	38000000	8.34426e+06		3.32667e+07	2.22161e+06	3.46667e+07	2.00056e+06	6.26667e+07	4.53235e+06	20800000	778888
103	86.1	0.62	1	102.116	[M+H]+	Phenolamines	1,5-Diaminopentane	103, 86	33200000	3.19479e+06	6460000	596713	1.69667e+06	118977	435000	70630.5		NA	NA	NA	NA	499000	44564.6	186667	26132.1
179	70.9	0.76	1	180.063	[M-H]-	Saccharides and Alcohols	D(+)-Glucose	179, 71	7.78333e+06	796255	8.64333e+06	604998	9.87667e+06	779587	16100000	1.06771e+06		1.62333e+06	40276.8	1310000	101980	897667	51860.9	2890000	85244.7
130.1	88	0.93	1	131.07	[M-H]-	Organic acids	Creatine	130.08733, 88.0406, 58.0289, 87.7735, 82.0679, 71.0106	2120000	117757	1.91333e+06	148847	1.02033e+06	58539.6	966333	45389.7		1.22333e+06	141970	1210000	8164.97	1.42667e+06	77172.2	1270000	42426.4
114.1	114	0.57	1	113.059	[M+H]+	Organic acids	Creatinine	112.0589, 83	487667	37464.1	499333	20072.1	522667	39160.6	454667	6128.26		556333	89018.1	532667	11085.5	462333	27920.5	422333	1885.62
183.1	111	0.79	1	182.079	[M+H]+	Saccharides and Alcohols	D-Mannitol	183.08, 147	654667	48237.8	556000	68058.8	589000	40307.2	453333	78035.6		639000	125079	472333	37366.1	788000	24535.7	523667	40672.1
375	255.2	3.17	1	376.138	[M-H]-	Vitamins	Riboflavin	375, 255	NA	NA	NA	NA	NA	NA	54666.7	13180.9		NA	NA	108100	28102.3	255000	14719.6	70900	12389.5
126	126	0.84	1	125.015	[M+H]+	Organic acids	2-Aminoethanesulfonic acid	124.00718, 79.9574, 123.6236, 80.9672, 106.9803, 64.9703	1.04633e+06	209368	1.23133e+06	189430	1.45667e+06	81785.6	1.40333e+06	40276.8		859333	87518.9	802000	49725.9	961667	26157.6	1.22667e+06	49216.1
173.1	83	3.82	1	174.089	[M-H]-	Organic acids	Suberic acid	173.08111, 111.0817, 83.0496, 109.0642, 57.0344	1840000	72571.8	1380000	92736.2	364333	37544	130000	3741.66		153000	5887.84	179333	10964.6	188000	5715.48	74333.3	8081.39
90	71.8	0.78	1	89.048	[M+H]+	Amino acids and derivatives	L-Alanine	88.048, 71	1.10433e+06	170756	3.08333e+06	161107	2.64333e+06	691584	8.13667e+06	956115		1.88333e+06	163367	2.54667e+06	151731	5030000	322594	15100000	1.2083e+06
189.1	87	6.15	1	188.105	[M+H]+	Organic acids	Diethylglutarate	189.11175, 87.0446, 115.0748, 143.0699, 55.0174, 69.0331	NA	NA	41339.3	58449.9	127000	16083.1	45169.7	33959.2		NA	NA	NA	NA	332333	8178.56	301333	10498.7
149	58.9	0.77	1	150.053	[M-H]-	Saccharides and Alcohols	DL-Arabinose	149, 59	1.51333e+06	122837	1.57333e+06	105304	1.68667e+06	108730	4.17333e+06	238933		1.00633e+06	61266.3	732333	35863.9	538333	11671.4	1.56333e+06	81785.6
177	160.2	1.58	1	176.095	[M+H]+	Plumerane	serotonin	177.10224, 160.0765, 115.0544, 132.0824, 117.057, 159.0685	400333	71490.5	1.11733e+06	109913	929000	355812	1.20967e+07	4.54973e+06		1.15267e+07	4.91467e+06	1.60667e+07	3.35592e+06	25200000	4.77703e+06	323000000	5.30346e+07
133	70.8	0.97	1	134.022	[M-H]-	Organic acids	L(-)-Malic acid	133.01484, 71.0134, 115.0036, 72.9933, 89.0228, 59.0184	6.39333e+06	295334	8600000	326190	5980000	222261	1900000	57154.8		1700000	128323	2.81333e+06	179320	2.21333e+06	118977	1.50667e+06	118134
191	85	1.13	1	192.063	[M-H]-	Organic acids	Quinic acid	191.05654, 85.0297, 93.0349, 87.009, 59.0131, 127.0384	556000	23280.9	885667	177532	2.00667e+06	224549	4.18667e+06	136951		1.20667e+06	78457.3	1.80333e+06	443947	2.39667e+06	499489	4530000	349380
170	96	0.67	1	169.181	[M+H]+	Amino acids and derivatives	3-N-Methyl-L-histidine	170, 96	650667	54020.6	841667	95325.2	1270000	92014.5	2.24667e+06	102089		720333	39194.7	828000	47672.5	1320000	77888.8	573339	810812
191	131	0.84	1	192.027	[M-H]-	Organic acids	Citric acid	191.02083, 111.0088, 87.0085, 85.0278, 129.0181, 67.0155	1130000	123558	2010000	238467	5.94333e+06	438203	1.04667e+07	385861		1071000	170065	3.71333e+06	399361	5.48333e+06	259529	8290000	325372
112.1	94.6	0.63	1	111.08	[M+H]+	Amides	Histamine	112.08, 95	1.94667e+06	351125	1580000	112250	1.41667e+06	247162	1440000	184572		1.01033e+06	222352	952333	45857.3	1.41333e+06	143372	1.20333e+06	98432.2
131.1	68.9	3.51	1	132.079	[M-H]-	Organic acids	(S)-(-)-2-Hydroxyisocaproic acid	131.08, 85	206667	20757.9	412000	37416.6	589333	39135.1	884333	453024		169333	31584.1	160667	3091.21	110000	8524.47	163000	45519.2
123.1	123	0.88	1	122.058	[M+H]+	Saccharides and Alcohols	DL-threitol	121, 59	254667	49995.6	219333	13474.3	200667	12710.5	185333	6649.98		91500	10859.4	65433.3	6973.44	104867	8765.59	117667	4784.23
155	111	1.08	1	156.017	[M-H]-	Vitamins	Orotic acid	155, 111	253333	21746	479667	29488.2	649000	44181.4	957000	83222.6		756333	40827.6	742333	70627.3	806667	10656.2	1.11667e+06	47842.3
181	135.1	3.11	1	180.042	[M+H]+	Phenolic acids	Caffeic acid	179.03493, 135.0466, 134.038, 107.0495, 117.0352, 79.0553	5910000	344770	26500000	2.70678e+06	2.56667e+07	3.49889e+06	14500000	509902		8.66333e+06	689750	9.98667e+06	504667	9.05667e+06	581626	6760000	457238
181.1	70.8	0.75	1	182.079	[M-H]-	Saccharides and Alcohols	Dulcitol	181.07303, 71.0135, 59.0138, 101.0238, 55.0185, 89.0234	53633.3	7785.6	63900	1435.27	81800	15989	201333	69139.2		233000	33075.7	185000	2943.92	248667	20138.4	329667	16996.7
303	285.5	6.45	1	302.006	[M+H]+	Tannin	Ellagic acid	300.99933, 229.0133, 185.0257, 257.0067, 283.9946, 245.0073	NA	NA	NA	NA	NA	NA	NA	NA		94666.7	31849.5	23866.7	6673.5	12866.7	188.562	9269.67	6909.41
245.1	227.1	3.32	1	244.088	[M+H]+	Vitamins	Biotin	243.09, 200	1.13667e+06	82596.7	1080000	8164.97	387667	40549	178000	22861.9		235000	33793.5	347333	20885.9	573333	43835.6	159333	27956.3
138	137.9	0.79	1	137.048	[M+H]+	Pyridine alkaloids	Trigonelline	138.05523, 92.0505, 94.0657, 78.035, 65.0393, 93.0571	734667	56576.4	212333	20417.9	125333	17133.5	157667	34305.8		489667	169148	367333	32417.4	187000	29028.7	157333	11841.5
152	108.1	1.34	1	153.043	[M-H]-	Phenolic acids	3-Aminosalicylic acid	152.03563, 108.0458, 107.0372, 65.0385, 91.0195, 119.039	156667	20286.8	149333	11897.7	NA	NA	NA	NA		113000	7257.18	219333	29227.1	NA	NA	NA	NA
362	78.9	1.15	1	363.058	[M-H]-	Nucleotides and derivatives	Guanosine monophosphate	362, 211	36700	9962.93	66700	14968.2	64200	10472.8	91766.7	15017.8		89300	11202.1	68733.3	771.722	44200	4788.18	63433.3	12144.2
89	71.9	0.64	1	88.1	[M+H]+	Phenolamines	Putrescine	89, 72	6.97333e+06	1.30016e+06	2970000	411582	726000	115991	19606	27714.3		4.93333e+06	646753	7670000	264197	933333	231808	NA	NA
303.1	303.1	5.72	1	302.079	[M+H]+	Flavanones	Hesperetin	301.07318, 164.0121, 286.0494, 151.0046, 242.0599, 201.0206	NA	NA	NA	NA	NA	NA	985333	131497		1.77333e+06	327855	2.23333e+06	531998	3.33667e+06	273537	1.11467e+07	1.6331e+06
122.1	105	2.39	1	121.089	[M+H]+	Amides	Phenethylamine	122.09695, 105.0715, 77.0398, 79.055, 103.0552, 51.0236	7800000	359537	5.68333e+06	49216.1	5.39333e+06	385170	2.39667e+07	3.89644e+06		14600000	1.46969e+06	25200000	1.55778e+06	21500000	535413	1.71667e+07	1.4522e+06
109	80.9	3.37	1	108.021	[M+H]+	Quinones	Quinone	109, 81	361667	34003.3	719000	31273	1.08667e+06	83798.7	1240000	113137		30572.7	43223.6	NA	NA	59006	83434.4	NA	NA
145	80.8	1.13	1	146.022	[M-H]-	Organic acids	α-Ketoglutaric acid	145, 101	466667	28871.4	303667	20949.7	325667	63876.6	117867	20054.1		158000	9092.12	195667	12814.9	396667	21853	187333	35490.2
222.1	163	2.61	1	223.085	[M-H]-	Amino acids and derivatives	N-Acetyl-L-tyrosine	222.1, 180	280000	26870.1	372000	16309.5	356333	13021.3	453333	26234		660333	168960	427333	33330	702333	72669.7	858333	56747
447.3	285.1	3.79	1	448.101	[M-H]-	Flavones	Luteolin 7-O-glucoside (Cynaroside)	447.3, 285.2	6020000	2.3287e+06	334900	322598	479333	256839	481333	133767		7.34333e+06	1.11404e+06	3130000	657622	3050000	586572	5.61333e+06	1.845e+06
139.1	93	3.01	1	138.032	[M+H]+	Phenolic acids	Protocatechuic aldehyde	137.02492, 93.0341, 137.0239, 136.0156, 108.0209	1.55333e+06	409417	909000	109060	379667	41475.6	178333	34120.7		1.65367e+06	590198	2.53667e+06	383174	1.18033e+06	245045	479667	122834
133	70	0.65	1	132.16	[M+H]+	Amino acids and derivatives	L(+)-Ornithine	133, 116	94100	24729.3	124000	15513.4	186667	46549.9	161333	10624.9		170000	22226.1	107367	11636.2	200667	9533.57	NA	NA
173	137	0.75	1	174.016	[M-H]-	Organic acids	Cis-Aconitic acid	173.016, 137	794667	54737.8	446667	4109.61	154000	26620.8	NA	NA		624667	82532.1	490333	38134.3	199667	22454.9	23836.3	17082.3
174	88	1.19	1	175.048	[M-H]-	Amino acids and derivatives	N-Acetylaspartate	174, 88	74500	9651.25	79933.3	9066.18	55533.3	1677.96	57833.3	3512.2		35833.3	6350.5	29400	1451.44	46833.3	14584.5	67966.7	2718.25
219	156.1	1.13	1	218.09	[M+H]+	Amino acids and derivatives	(5-L-Glutamyl)-L-amino acid	217, 199	283333	131497	182333	28193.8	85833.3	6998.25	128333	20499.3		247333	73902.3	222333	19669.5	196667	16519.3	138333	13816.3
184.1	148.1	1.67	1	183.053	[M+H]+	Vitamins	4-Pyridoxic acid	182.05, 138	157667	12814.9	217000	21181.8	574333	36114	1.02933e+06	962320		970000	110511	974000	89129.1	574333	6182.41	791333	239625
167.1	139	2.43	1	168.042	[M-H]-	Organic acids	3,4-Dihydroxybenzeneacetic acid	167.1, 123	868667	270044	5.90333e+06	1.30247e+06	515667	72417	NA	NA		497333	108660	350667	38767.1	164000	19304.6	90003	63891.5
192.1	114.9	3.04	1	191.058	[M+H]+	Plumerane	5-Hydroxyindole-3-acetic acid	192.06, 146	NA	NA	88266.7	15271.2	340667	6944.22	1.37667e+06	428200		NA	NA	NA	NA	NA	NA	NA	NA
112.1	93.9	2.99	1	111.032	[M+H]+	Organic acids	Pyrrole-2-carboxylic acid	110.02598, 66.0343, 64.0184, 65.8394, 67.7525	713000	300363	465000	22642.1	181000	24711.7	13639.3	19276.2		127133	54654.4	196667	28859.8	16672.7	23566	NA	NA
118	88	0.84	1	117.079	[M+H]+	Amino acids and derivatives	Dl-Norvaline	118, 72	1.04133e+07	1.37466e+06	2.53333e+07	618241	3.72333e+07	3.40033e+06	2.96333e+07	590668		1.67333e+07	1.17851e+06	1.98333e+07	873053	17200000	748331	3.29333e+07	1.00775e+06
742.1	620.2	1.22	1	743.075	[M-H]-	Nucleotides and derivatives	NADP	742.1, 620.1	475000	15641.8	939000	84856.7	344667	12283.7	744333	62993.8		1350000	107083	634333	190008	93600	19550.1	525000	87086.2
121	91.9	3.69	1	122.037	[M-H]-	Phenolic acids	4-Hydroxybenzaldehyde	121.03015, 92.0296, 93.0346, 108.0224, 120.0217, 91.0189	6.38667e+06	197034	5.09667e+06	352641	3.36333e+06	385256	1.36333e+06	59066.8		3540000	587594	4.86667e+06	333300	3.15667e+06	213125	2.99667e+06	1.15266e+06
131	71.9	0.72	1	130.111	[M+H]+	Amides	N-Acetylputrescine	131, 114	2.12333e+08	2.40046e+07	4.55667e+07	4.75418e+06	6.12333e+07	6.85582e+06	1.36333e+07	2.26029e+06		193000000	1.63299e+06	1.90333e+08	1.0873e+07	9.87333e+07	1.64482e+07	9.99667e+06	851365
313.4	120	3.52	1	312.147	[M+H]+	Amino acids and derivatives	Phe-Phe	311.4, 164.2	65533.3	13691	39066.7	286.744	61966.7	6030.11	194333	16819.3		76800	32474.3	93500	50812.7	63066.7	14165.8	47266.7	18717.3
144.1	102	1.62	1	145.074	[M-H]-	Organic acids	4-Acetamidobutyric acid	144.074, 102	574667	95611.5	571000	84868.5	386000	51775.2	444667	19770.9		750000	88904.4	500333	89122.9	519000	69286.8	478000	39370
153.2	109	2.64	1	154.027	[M-H]-	Organic acids	2,3-Dihydroxybenzoic acid	153.02044, 65.0399, 109.0294, 67.0191, 91.0185	2.68667e+06	694422	1.83333e+06	111455	698000	40108.2	823000	16970.6		2.42667e+06	539156	2440000	219545	1080000	37416.6	812000	67349.8
146.1	118.1	4.49	1	145.053	[M+H]+	Plumerane	Indole-3-carboxaldehyde	144.1, 126	940000	92793.7	496333	53773.2	240333	34315.5	218000	32341.9		2.22333e+06	563698	1.06933e+06	307703	993000	221686	602000	218682
399.2	250.1	0.76	1	398.137	[M+H]+	Amino acids and derivatives	S-(5'-Adenosyl)-L-methionine	399.2, 250	30100000	4.53211e+06	5.00333e+07	3.9911e+06	4.15667e+07	1.86964e+06	2.94667e+07	3.98776e+06		1.20767e+07	3.25961e+06	1.24333e+07	793025	20300000	1.43062e+06	14100000	1.55134e+06
222	138.1	0.6	1	221.09	[M+H]+	Saccharides and Alcohols	N-Acetyl-D-glucosamine	220, 202	1.09333e+07	531246	1.29667e+07	1.63367e+06	1.93667e+07	5.04403e+06	1.55333e+07	1.63571e+06		18100000	5.17752e+06	1.72667e+07	3.2968e+06	1.55667e+07	946338	13100000	1.85472e+06
162	144.1	0.78	1	163.129	[M-H]-	Amino acids and derivatives	4-Hydroxy-L-glutamic acid	162.04153, 144.0296, 99.0088, 55.0188, 72.0091, 116.0326	10603.3	2263.07	15866.7	1653.95	35166.7	1307.24	35933.3	1388.84		13100	1349.07	12833.3	1483.99	18333.3	2043.42	20633.3	5778.89
219	160.1	3.23	1	218.106	[M+H]+	Plumerane	N-Acetyl-5-hydroxytryptamine	219.11399, 160.0762, 132.0806, 98.9753, 115.0539, 117.0576	4.29667e+06	568057	1.83667e+06	63421	1890000	120277	1.68333e+06	122293		1.59667e+06	296798	1.74333e+06	38586.1	928667	68246.3	NA	NA
165	150.1	1.69	1	166.049	[M-H]-	Nucleotides and derivatives	7-Methylxanthine	165, 122	1.34333e+06	44969.1	1520000	183848	851667	30136.7	132667	23471		95533.3	14842.6	184333	19618.6	116000	6976.15	37166.7	2131.25
239	223	6.74	1	240.245	[M-H]-	Free fatty acids	Palmitaldehyde	239, 223	1.50667e+06	98770.2	2.76333e+06	82596.7	3.50333e+06	198718	3.45333e+06	103387		717667	246095	964667	23471	1.88667e+06	370075	2.07667e+06	506316
140	78.5	0.71	1	141.019	[M-H]-	Others	O-Phosphorylethanolamine	140.01202, 78.9593, 62.9665, 81.6994, 80.5084	171000	8602.33	386000	10033.3	379000	26993.8	469333	43222.9		300667	33489.6	293667	20981.5	300333	20038.9	309667	10498.7
130	88.9	0.86	1	129.101	[M+H]+	Others	1,1-Dimethylbiguanide	130, 71.9	119333	12037	145000	14352.7	306333	42944.4	339667	23328.6		260333	24984.4	352667	41120.4	163000	5354.13	117333	2054.8
166	124.1	0.77	1	167.037	[M-H]-	Organic acids	Guanidinoethyl sulfonate	166.037, 124	11206.7	3889.73	13733.3	410.961	17100	2477.9	36666.7	4993.55		10603	7491.09	12866.7	2671.25	16533.3	1806.16	58333.3	6184.57
269	134	0.81	1	268.055	[M+H]+	Amino acids and derivatives	L-Homocystine	267, 134	75400	6099.73	63966.7	11380.2	80433.3	28095.8	208667	12283.7		41333.3	2260.29	70100	22074.6	116667	15084.9	96633.3	1960.16
319.1	193	3.47	1	320.053	[M-H]-	Flavanonols	Dihydromyricetin	319.05, 301	NA	NA	26666.7	2885.98	87866.7	169.967	125333	13474.3		25436.3	18483.8	9706	13713.6	59600	5123.15	96266.7	4767.48
353.1	191.1	2.38	1	354.095	[M-H]-	Phenolic acids	1-O-Caffeoyl quinic acid	353.09045, 191.0575, 179.0346, 161.0247, 135.0451, 173.0452	88803	68584.4	259000	22759.6	231000	59098.8	789667	254797		6.55667e+06	4.11096e+06	1.43467e+07	6.2011e+06	1.18667e+07	1.666e+06	1.52833e+07	7.20721e+06
137	92.5	3.05	1	138.032	[M-H]-	Phenolic acids	4-Hydroxybenzoic acid	137.02516, 136.0182, 108.0225, 81.035, 92.0273, 109.0302	5.29667e+06	446791	2.28333e+06	51854.5	2.02333e+06	208220	908333	54920.1		6.46333e+06	879255	8.21333e+06	1.47775e+06	6520000	604869	3910000	916770
161	56.8	1.4	1	162.053	[M-H]-	Amino acid derivatives	3-Hydroxy-3-methylpentane-1,5-dioic acid	161.04658, 57.034, 99.0438, 59.0132, 101.0236, 56.8615	2.58333e+06	89938.3	1.34333e+06	147271	1.44333e+06	142906	875667	21139.7		2.44333e+06	310090	2.01333e+06	318469	2.17333e+06	274510	894667	74593.7
609.2	301.1	3.96	1	610.19	[M-H]-	Flavanones	Hesperetin 7-rutinoside (Hesperidin)	609.19, 301	NA	NA	NA	NA	3119.33	4398.68	3406	4804.08		NA	NA	114667	29533.9	258667	6182.41	946667	89938.3
273.1	153.1	5.47	1	272.069	[M+H]+	Chalcones	Naringenin	273.07688, 153.0194, 147.045, 119.0501, 123.0436, 91.0543	NA	NA	NA	NA	36333.3	9998.11	972667	217871		33272.7	47041.9	NA	NA	149000	4966.55	1930000	248596
287.1	125.1	4.58	1	288.063	[M-H]-	Flavanonols	Aromadedrin (Dihydrokaempferol)	287.06, 259	28433.3	1327.49	12600	2631.86	28366.7	4993.55	62866.7	7831.7		240667	58065.1	180333	77676	96000	9273.62	210333	50625
193.1	178.1	4	1	192.042	[M+H]+	Coumarins	Scopoletin (7-Hydroxy-5-methoxycoumarin)	191, 148	757333	71336.4	348000	84249.6	356000	67325.1	92672.7	131046		567667	118159	571667	61282.6	696667	95778.7	871333	337873
403	159	0.68	1	404.161	[M-H]-	Nucleotides and derivatives	Uridine 5’-diphosphate	403, 159	148000	4320.49	221000	17962.9	160000	11575.8	267000	24590		240000	47672.5	131100	24865.4	80666.7	16223.9	93433.3	7282.09
104.1	87	0.77	1	103.063	[M+H]+	Organic acids	γ-aminobutyric acid	104.07048, 69.0388, 87.0498, 68.0546, 86.0689, 53.0055	12200000	1.79072e+06	1.71667e+07	1.4522e+06	1.11967e+07	1.60998e+06	12200000	496655		9.87333e+06	866769	10670000	1.71769e+06	12300000	653197	9.24667e+06	389644
104	85.9	0.74	1	103.063	[M+H]+	Organic acids	2-Aminoisobutyric acid	102.063, 85	7110000	570438	8.56667e+06	364448	8.37333e+06	570458	6.81333e+06	196016		7090000	492815	6.69667e+06	163367	6.81667e+06	108730	6.20667e+06	509924
104	58	0.75	1	103.063	[M+H]+	Amino acid derivatives	N,N-Dimethylglycine	104.07077, 58.0663, 56.0487, 57.8945, 86	1.28667e+07	1.82635e+06	15200000	1.06771e+06	1.09667e+07	895669	9.74333e+06	253026		9.67333e+06	929026	9280000	984107	1.00333e+07	329983	8.16333e+06	410636
130	83.9	1.04	1	129.043	[M+H]+	Amino acids and derivatives	5-oxoproline	130, 84	10720000	1.52735e+06	2.14333e+07	953357	1.19667e+07	873053	18200000	216025		5.86333e+06	745311	1.03867e+07	666600	1.08333e+07	543650	7.11333e+06	291700
169.1	134.1	0.66	1	168.09	[M+H]+	Others	4-(Aminomethyl)-5-(hydroxymethyl)-2-methylpyridin-3-ol	167.09, 122	8700000	612264	1.27333e+07	449691	1.35667e+07	1.46591e+06	17900000	1.44453e+06		2.71667e+06	98770.2	4.66667e+06	151511	7930000	374967	4720000	359537
164	92	3.84	1	165.043	[M-H]-	Phenolic acids	2-(Formylamino)benzoic acid	164.04, 120	2.21333e+06	563875	393667	40998.6	149667	30814.9	66733.3	5313.09		341333	87758.5	370000	74085.5	183333	9428.09	91700	16249.9
118	73.9	1.32	1	119.022	[M-H]-	Organic acids	Aminomalonic acid	118, 74	3.76667e+06	80553.6	1.56667e+06	57927.2	2760000	134412	1.55333e+06	359753		1300000	118603	1360000	81649.7	2.30667e+06	181169	844333	42625
150	133.1	1.03	1	149.07	[M+H]+	Nucleotides and derivatives	1-Methyladenine	148, 107	2.22667e+07	464280	1.23333e+07	543650	10320000	327821	6.24667e+06	571100		3.59333e+07	1.51511e+06	2.75667e+07	857645	1.92667e+07	518545	17200000	535413
209	179.1	3.83	1	210.089	[M-H]-	Phenolic acids	Sinapyl alcohol	209.08278, 179.0362, 161.0253, 151.0409, 194.0601, 176.0493	NA	NA	64703	80382	66100	6235.92	18533.3	5073.68		22506	31815.6	NA	NA	74033.3	24108.1	18806	26583
465	302.9	3.85	1	464.096	[M+H]+	Flavonols	Quercetin 4'-O-glucoside (Spiraeoside)	463, 301	821667	103171	1.71333e+06	322525	1.23333e+06	139603	1077000	126510		23700000	1.20277e+06	8740000	1.80938e+06	7.28333e+06	1.10376e+06	1.43667e+07	2.4074e+06
145.1	102	1.38	1	146.069	[M-H]-	Organic acids	Ureidoisobutyric acid	145.07, 102	93233.3	27122.5	154667	47062.6	220333	18979.5	21636.3	15468.9		NA	NA	NA	NA	NA	NA	NA	NA
147.1	58.8	1.3	1	148.074	[M-H]-	Organic acids	(Rs)-Mevalonic acid	147.0672, 59.0136, 57.0344, 61.9885, 99.0449	1750000	120277	1.97333e+06	151511	1.84333e+06	245266	1.23333e+06	81785.6		2510000	268701	1.99333e+06	109646	1.80333e+06	53124.6	1160000	32659.9
259	96.9	0.69	1	260.03	[M-H]-	Saccharides and Alcohols	D-Glucose 6-phosphate	259.02326, 96.9696, 78.9575, 198.9649, 138.9449, 180.9574	8.09667e+06	1.20754e+06	1.22333e+07	740870	6.75333e+06	551745	9060000	566216		3.14667e+06	323144	3470000	45460.6	2.95667e+06	66499.8	1.72667e+06	77172.2
289	78.9	1.08	1	290.04	[M-H]-	Saccharides and Alcohols	D-Sedoheptuiose 7-phosphate	289, 97	8320000	351094	1.19333e+07	590668	1.22333e+07	984322	9380000	272764		3.72667e+06	147045	4.35333e+06	179134	2.59667e+06	143836	4030000	198662
324	112	0.78	1	323.052	[M+H]+	Nucleotides and derivatives	Cytidine 5'-monophosphate (Cytidylic acid)	322, 97	316667	39041.3	296667	25940.1	266000	31026.9	331000	25807		256333	64592.7	328333	75817	348333	93203.5	244667	39092.5
179	75.9	0.78	1	178.041	[M+H]+	Amino acids and derivatives	CYS-GLY	179, 76	NA	NA	NA	NA	205333	49304	479333	9672.41		NA	NA	NA	NA	NA	NA	79469.7	95647.1
332	136.1	1.14	1	331.068	[M+H]+	Nucleotides and derivatives	2'-Deoxyadenosine-5'-monophosphate	332.07537, 136.0621, 81.0339, 119.0358, 98.9794, 272.9336	931333	18061.6	1610000	80415.6	3.60667e+06	130979	8.28333e+06	539897		3570000	259230	3.27667e+06	127628	4700000	120277	6.96333e+06	207257
325	97	1.23	1	324.036	[M+H]+	Nucleotides and derivatives	Uridine 5'-monophosphate	323.02977, 211.0151, 96.9695, 111.019, 210.9999, 138.9794	231670	170404	459003	329068	580667	12710.5	523667	29634.8		166667	39835.8	194667	26837	282333	16977.1	117333	12552.1
118	76	1.2	1	117.043	[M+H]+	Amino acids and derivatives	N-acetylglycine	116, 74	3.18667e+06	131233	3.50667e+06	128149	4.16333e+06	279802	5.18667e+06	204993		2.76333e+06	280159	2660000	74833.1	2.10667e+06	225142	3190000	251529
74	56.9	0.71	1	73.0971	[M+H]+	Nucleotides and derivatives	1-methylguanidine	74, 57	1530000	104243	1.28667e+06	73635.7	1.34333e+06	89938.3	946667	45987.9		2070000	233666	1950000	35590.3	1.41333e+06	69442.2	680000	79401.9
141	58.7	0.69	1	142.027	[M-H]-	Organic acids	trans,trans-Muconic acid	141.03, 59	36033.3	1020.89	80333.3	12845.8	87966.7	18038.9	63100	19025.8		46833.3	4275.77	37266.7	9806.23	121667	11469.8	235000	26620.8
431	269.1	3.93	1	432.106	[M-H]-	Isoflavones	Genistein 7-O-Glucoside (Genistin)	431.10338, 431.101, 268.0397, 269.0469, 267.0291, 311.0575	350667	9741.09	283000	31026.9	120000	5099.02	52200	3785.06		62133.3	12915.2	26466.7	1759.42	NA	NA	31703	26688.9
463	301.1	3.81	1	464.096	[M-H]-	Flavonols	Quercetin 3-O-glucoside (Isotrifoliin)	463, 301	596667	12498.9	2.04667e+06	324174	995333	77310.3	1.36667e+06	126842		2150000	195959	1500000	353648	1.56333e+06	228668	8.75667e+06	694422
577	413.1	3.57	1	578.164	[M-H]-	C-glycosylated flavones	Vitexin 2''-O-beta-L-rhamnoside	577, 413	75533.3	11662.6	57100	787.401	73166.7	6836.34	39800	7376.99		47133.3	169.967	17003	12744.6	NA	NA	19269.7	13628.2
341	179.1	2.72	1	342.132	[M-H]-	Phenolic acids	Coniferin	341.12478, 177.0186, 179.0774, 146.0407	2.32667e+06	168589	10010000	925959	8.41333e+06	1.24111e+06	4.37333e+06	183545		3530000	477703	3.73667e+06	254602	2.91333e+06	166800	1.91333e+06	160485
611	303	2.37	1	611	[M]+	Anthocyanidins	Delphinidin 3-O-rutinoside (Tulipanin)	611, 303	NA	NA	NA	NA	NA	NA	NA	NA		33766.7	10781	48333.3	7420.84	43033.3	1065.62	40333.3	5063.16
269	241.1	4.32	1	270.053	[M-H]-	Isoflavones	6-Hydroxydaidzein	269, 241	655000	64637.5	51533.3	32294.9	51733.3	10336.5	36400	6375.47		NA	NA	NA	NA	NA	NA	NA	NA
269	225	4.37	1	270.053	[M-H]-	Isoflavones	2'-Hydroxydaidzein	269, 225	6.32667e+06	535060	494667	297344	478333	100350	363000	59486.7		NA	NA	NA	NA	NA	NA	NA	NA
447	284	3.99	1	448.101	[M-H]-	Flavonols	Kaempferol 3-O-galactoside (Trifolin)	447, 285	4900000	1.77996e+06	262167	238991	397000	228833	399333	123446		6450000	369143	2280000	700999	2.19333e+06	414916	4.32667e+06	894440
433	287	4.45	1	432.106	[M+H]+	Flavonols	Kaempferol 3-O-rhamnoside (Kaempferin)	431, 285	7.26667e+07	6.6615e+06	60000000	1.43118e+07	5.36333e+07	2.6837e+06	2.83667e+06	457627		14200000	1.63911e+06	9280000	651818	5.00333e+06	502284	1.51333e+06	60184.9
301	149.1	4.38	1	302.043	[M-H]-	Flavones	Tricetin	301.03482, 149.025, 151.0047, 191.0358, 215.0368, 255.0331	NA	NA	NA	NA	NA	NA	NA	NA		14266.7	694.422	13833.3	623.61	5016.33	3562.34	61366.7	14859.6
149	130.1	3.5	1	150.068	[M-H]-	Phenolic acids	p-Coumaryl alcohol	149.06128, 130.0429, 131.051, 103.0551, 102.0468, 129.6454	NA	NA	246000	13638.2	26503	18744.1	NA	NA		18500	6658.83	55866.7	4008.6	37666.7	10859.8	NA	NA
145.1	101.1	2.63	1	146.058	[M-H]-	Organic acids	2-Methylglutaric acid	145.05042, 101.0608, 83.0498, 127.0384, 55.0185, 73.0297	3.35667e+06	49888.8	1.96333e+06	105304	1.24667e+06	80553.6	987333	184588		2230000	126754	2.60333e+06	61824.1	2.26667e+06	148399	1.37667e+06	143372
259	78.8	0.97	1	260.03	[M-H]-	Saccharides and Alcohols	D-Fructose 6-phosphate	259, 97	2.60333e+06	184089	4.06667e+06	111156	2.49667e+06	86538.4	3.07333e+06	114698		998667	82240.8	1.10667e+06	36817.9	1029000	22992.8	691667	36808.8
153.1	136.1	1.48	1	152.059	[M+H]+	Pyridine derivatives	1,4-dihydro-1-Methyl-4-oxo-3-pyridinecarboxamide	153.06, 136.1	5.18667e+06	382129	2.63333e+06	204993	1.90333e+06	294882	1046000	91971		1.19467e+06	471594	928667	252061	1.72667e+06	168193	565667	142376
382	134.1	2.17	1	383.108	[M-H]-	Nucleotides and derivatives	N6-Succinyl Adenosine	382, 206	897000	21648.7	1.07867e+06	99617	2.08333e+06	169771	3.23333e+06	415157		987667	124890	858000	21740.9	1.23333e+06	85764.5	2130000	220151
131.1	70.8	2.63	1	132.079	[M-H]-	Organic acids	5-hydroxyhexanoic acid	131.08, 85	719333	83543.7	339667	16937.8	765667	103812	1.06067e+06	142224		376667	52772	381333	33767.2	558000	16573.1	469333	40540.8
144.1	126.1	0.82	1	145.074	[M-H]-	Amino acids and derivatives	Allysine(6-Oxo DL-Norleucine)	144.1, 126	123333	13960.3	94166.7	2793.25	121667	12498.9	182333	8653.84		2790000	228619	1.96667e+06	83400	1660000	48989.8	1.48667e+06	204342
160	73.9	1.21	1	161.069	[M-H]-	Amino acids and derivatives	N-Acetylthreonine	160, 98	114667	7586.54	111333	2624.67	80733.3	12883.2	65800	2969.85		229667	20499.3	187333	14613.5	147000	6377.04	87600	1344.12
189	144.2	0.68	1	188.127	[M+H]+	Amino acids and derivatives	H-HomoArg-OH	187, 145	6900000	398079	10290000	714470	12300000	860233	1.25333e+07	880656		1.46667e+07	2.2306e+06	1.20667e+07	309121	13700000	408248	1.56667e+07	659966
177	133.1	3.19	1	178.027	[M-H]-	Coumarins	Esculetin (6,7-dihydroxycoumarin)	177.01984, 133.0303, 105.0345, 89.0398, 149.0254, 77.0398	605667	86063.3	720000	199220	255000	24344.7	386333	204943		7.07333e+06	1.91068e+06	10720000	1.82479e+06	3920000	876964	4.69667e+06	2.04223e+06
209.2	194.1	3.57	1	208.037	[M+H]+	Coumarins	6-Methoxy-7,8-DihydroxyCoumarin	207.1, 192	390006	551539	659333	182414	2.22667e+06	176131	5960000	553052		156673	221556	413333	104500	512667	70674.5	513667	52954.9
339.1	177.1	2.71	1	340.079	[M-H]-	Coumarins	Esculin (6,7-Dihydroxycoumarin-6-glucoside)	339.05201, 177.0215, 133.0302, 176.0122, 149.0238	1.98667e+07	2.80159e+06	3.98333e+06	285463	2.69667e+06	198718	1490000	102307		1.79967e+07	7.17268e+06	9.46333e+06	2.65036e+06	3.24333e+06	331696	2340000	240555
207.1	177.1	4.43	1	208	[M-H]-	Phenolic acids	Sinapinaldehyde	207.06739, 177.0199, 192.0438, 149.0245, 121.0295	29833.3	3329	373000	46483	291000	40008.3	83033.3	17074.4		601333	39969.4	1.20333e+06	122565	748667	67277.2	336000	67542.6
301.1	151	5.71	1	302.279	[M-H]-	Flavanones	Homoeriodictyol	301.1, 151	NA	NA	NA	NA	NA	NA	NA	NA		35600	6419.24	37800	8285.33	73566.7	7135.05	97100	6491.53
271.1	151	5.59	1	272.069	[M-H]-	Flavanones	Rutin	271.07, 151	173000	24752.1	61566.7	13376.7	3.19333e+06	747098	8.66667e+07	2.78475e+07		1707000	1.01487e+06	576667	81069.2	4.48667e+06	132749	77200000	9.78809e+06
277.1	146.2	2.75	1	278.13	[M-H]-	Vitamins	Pantetheine	277.12477, 146.0839, 217.1217, 71.0507, 130.0328, 70.0304	75966.7	13238.9	109567	12084.8	88466.7	12160.7	21166.7	3600.31		49500	3666.97	49966.7	5086.15	112767	24651.8	25733.3	4353.03
479.1	317.3	3.43	1	480.09	[M-H]-	Flavonols	Myricetin 3-O-galactoside	479.09, 315.5	115000	23930.5	65866.7	9631.31	28800	6017.2	NA	NA		34733.3	14418.1	86400	45041.5	46933.3	11157.2	3806	5369.77
353.2	233.2	8.24	1	354.147	[M-H]-	Chalcones	Xanthohumol	353.15, 233	NA	NA	NA	NA	NA	NA	NA	NA		NA	NA	NA	NA	NA	NA	8706	12299.4
179	179	3.31	1	178.027	[M+H]+	Coumarins	Daphnetin	179.03, 133	363000	49826.4	417333	68946	217667	40737.6	407667	49277		1.35267e+06	400001	2530000	209284	1.48333e+06	432075	1429000	581798
138.1	91.9	4.01	1	137.048	[M+H]+	Phenolic acids	Anthranilic acid	138.05548, 120.0465, 92.0535, 65.0412	261000	10677.1	37203	26301.3	57466.7	3002.59	22972.7	32475.5		112767	20133.9	91966.7	6601.18	49269.7	36118.8	NA	NA
193.1	72.9	0.72	1	194.043	[M-H]-	Saccharides and Alcohols	D-glucuronic acid	193.03679, 59.0132, 85.0293, 113.0248, 73.0288	791000	60216.3	843000	83765.5	425333	57921.4	403333	39075.4		325667	71285	365000	20116.3	240667	3091.21	4.19667e+06	669444
165.1	74.9	0.95	1	166.048	[M-H]-	Organic acids	D-Xylonic acid	165.04114, 75.009, 59.0139, 71.0138, 99.0098, 72.9935	4.63667e+06	196016	7.45333e+06	286395	11600000	804156	2.93667e+07	1.02089e+06		6.30333e+06	264113	6590000	48989.8	7.19333e+06	210608	7.26667e+06	325201
244.1	111.4	0.82	1	243.086	[M+H]+	Nucleotides and derivatives	Cytidine	242.086, 109	6400000	771622	5.54333e+06	643135	5.20333e+06	1.11024e+06	3080000	661362		1570000	226863	1.89333e+06	547560	5.47333e+06	1.2627e+06	1560000	247117
198.2	114.9	1.15	1	197.069	[M+H]+	Amino acid derivatives	3,4-Dihydroxy-DL-phenylalanine	196.2, 135	NA	NA	NA	NA	NA	NA	1096000	712714		NA	NA	NA	NA	97336.3	69902.1	286667	143927
346.2	152	1.68	1	345.047	[M+H]+	Nucleotide and its derivates	Guanosine 3',5'-cyclic monophosphate	343.99778, 150.0429, 133.0157, 78.9593, 192.9911	164000	20510.2	111800	14996	46066.7	7737.93	38933.3	3092.28		471333	111995	226333	42820	317667	21638.4	223333	83786.8
252	136.1	1.96	1	251.102	[M+H]+	Nucleotides and derivatives	Deoxyadenosine	250, 134	3.74667e+07	6.7401e+06	1.43333e+07	740870	7240000	967092	1.02733e+07	1.05708e+06		5.20667e+06	478632	5.17333e+06	362338	9.55333e+06	400860	5.74333e+06	606923
310	178.1	2.32	1	311.123	[M-H]-	Nucleotides and derivatives	2-(dimethylamino)guanosine	310, 178	107500	13095.8	73833.3	6661.5	52100	3374.41	14833.3	2503.77		42133.3	6239.84	41700	4477.35	35900	1202.77	4172.67	5888.31
166	149.1	1.3	1	165.065	[M+H]+	Nucleotides and derivatives	7-methylguanine	166, 103	201000	43977.3	1220000	118603	944333	281217	189333	29009.6		1.00167e+06	76412.6	968333	88635.3	2.86333e+06	253026	980000	29933.3
243	153.1	1.2	1	244.07	[M-H]-	Nucleotides and derivatives	β-Pseudouridine	243.0636, 153.0307, 183.0434, 111.0199, 110.0221, 140.0349	1580000	117757	650333	64922.2	365000	66833.1	136333	14613.5		134300	30870.4	191667	59157	463000	71530.9	82766.7	13612.8
269.1	137.1	1.44	1	268.081	[M+H]+	Nucleotides and derivatives	Hypoxanthine-9-β-D-arabinofuranoside	267.08, 135	1.62667e+06	44969.1	1.14667e+06	70395.7	996333	173725	1.76433e+06	1.06979e+06		2.09667e+06	712570	1290000	63770.4	2.05333e+06	298031	629333	152255
Note：Match score：Five indexes (Q1, Q3, Rt, CE and DP) are matched to MWDB and metabolite information public database
