# Supplementary material for: Integrative Analysis of the Metabolome and Transcriptome of a Cultivated Pepper and Its Wild Progenitor Chiltepin (Capsicum annuum L. var. glabriusculum) Revealed the Loss of Pungency During Capsicum Domestication
Source: Front Plant Sci. 2022 Jan 5;12:783496. doi: 10.3389/fpls.2021.783496 (PMC8767146; doi:10.3389/fpls.2021.783496)
Supplement: Supplementary file 3 [file Table_3.XLSX]

## Sheet: Sheet1
Table S3. Significantly changed compounds in the BB3 and Chiltepin
11DAP						22DAP						33DAP						55DAP
Compounds	VIP	Fold_Change	Log2FC	Type		Compounds	VIP	Fold_Change	Log2FC	Type		Compounds	VIP	Fold_Change	Log2FC	Type		Compounds	VIP	Fold_Change	Log2FC	Type
Capsaicin	1.16561	503333	18.9412	up		Capsaicin	1.10974	32.6628	5.02958	up		Capsaicin	1.08337	35.4497	5.1477	up		Capsaicin	1.15571	660.469	9.36735	up
Dihydrocapsaicin	1.09715	5872.63	12.5198	up		Dihydrocapsaicin	1.11457	75.1591	6.23188	up		Dihydrocapsaicin	1.06874	35.9225	5.16682	up		Dihydrocapsaicin	1.15899	716.654	9.48513	up
N-Caffeoyl agmatine	1.16473	481481	18.8771	up		methylQuercetin O-hexoside	1.15058	49.4519	5.62795	up		Selgin 5-O-hexoside	1.13994	40629.6	15.3102	up		methylQuercetin O-hexoside	1.16018	23.7605	4.57049	up
N-sinapoyl hydroxycoumarin	1.11872	2.78135	1.47579	up		Selgin O-malonylhexoside	1.15184	88.308	6.46447	up		Selgin O-malonylhexoside	1.13725	26.2308	4.71319	up		Selgin 5-O-hexoside	1.16722	134963	17.0422	up
methylQuercetin O-hexoside	1.16365	77.7286	6.28037	up		Quercetin-3-(6''-malonyl)-Glucoside	1.15286	18925.9	14.2081	up		Quercetin-3-(6''-malonyl)-Glucoside	1.14013	16777.8	14.0343	up		Selgin O-malonylhexoside	1.16684	62.8902	5.97476	up
Selgin 5-O-hexoside	1.15704	4.85934	2.28076	up		Tricetin O-malonylhexoside	1.04439	2.57589	1.36507	up		Hydroxyphenethylamine	1.12458	10.7227	3.42259	up		Quercetin-3-(6''-malonyl)-Glucoside	1.16748	14037	13.777	up
Naringenin C-hexoside	1.13473	2.05112	1.03641	up		Hydroxyphenethylamine	1.15183	9.50798	3.24914	up		Coumaroyl choline	1.04339	2.80744	1.48926	up		Tricetin O-malonylhexoside	1.15237	10.7092	3.42077	up
Selgin O-malonylhexoside	1.06446	1629.16	10.6699	up		Coumaroyl choline	1.09247	4.69017	2.22964	up		Feruloylcholine	1.12648	2.03516	1.02514	up		Cinnamoyl tyramine	1.16765	8611.11	13.072	up
Quercetin-3-(6''-malonyl)-Glucoside	1.16563	15333.3	13.9044	up		Quercetin-3,4'-O-di-beta-glucopyranoside	1.15108	5314.81	12.3758	up		9-Hydroxy-(10E,12Z,15Z)-octadecatrienoic acid	1.12642	4.72784	2.24118	up		Feruloylcholine	1.15657	6.99667	2.80667	up
Hydroxyphenethylamine	1.14456	7.48784	2.90455	up		Cinnamoyl tyramine	1.15079	16.5596	4.0496	up		1-O-Feruloyl quinic acid	1.13953	13.9847	3.80577	up		Xanthurenic acid	1.09425	2.2913	1.19617	up
Coumaroyl choline	1.13515	2.1858	1.12816	up		Feruloylcholine	1.09038	2.30527	1.20494	up		5-O-p-Coumaroylquinic acid	1.12977	15.307	3.93612	up		9-Hydroxy-(10E,12Z,15Z)-octadecatrienoic acid	1.01968	4.98405	2.31732	up
Quercetin-3,4'-O-di-beta-glucopyranoside	1.16262	38111.1	15.2179	up		1-O-Feruloyl quinic acid	1.13947	15.6394	3.96711	up		Luteolin 6-C-glucoside	1.0839	5.4179	2.43773	up		1-O-Feruloyl quinic acid	1.16438	9.15459	3.1945	up
Cinnamoyl tyramine	1.16233	11.1836	3.48331	up		Chrysin C-hexoside	1.14765	3.40712	1.76855	up		Isorhamnetin O-hexoside	1.14006	254074	17.9549	up		Chrysin C-hexoside	1.13772	4.76074	2.25118	up
Tricin 7-O-acetylglucoside	1.15704	3.14209	1.65173	up		5-O-p-Coumaroylquinic acid	1.13881	42.0211	5.39304	up		Benzamide	1.13786	3.90133	1.96397	up		5-O-p-Coumaroylquinic acid	1.15278	14.113	3.81895	up
5-Aminolevulinate	1.09928	2.54501	1.34767	up		Luteolin 6-C-glucoside	1.11704	7.81377	2.96602	up		delta-Tridecalactone	1.14013	63703.7	15.9591	up		Luteolin 6-C-glucoside	1.13937	10.6623	3.41445	up
1-O-Feruloyl quinic acid	1.07409	5.14752	2.36388	up		Limocitrin O-hexoside	1.14664	2.42053	1.27532	up		N-Acetyl tryptamine	1.14007	38629.6	15.2374	up		Limocitrin O-hexoside	1.1569	2.61229	1.38532	up
Luteolin 6-C-glucoside	1.15481	93.6616	6.54939	up		Benzamide	1.14818	3.86432	1.95022	up		MAG (18:4) isomer1	1.13965	7748.15	12.9196	up		Isorhamnetin O-hexoside	1.16064	6.20081	2.63246	up
Limocitrin O-hexoside	1.1617	8.58909	3.10251	up		delta-Tridecalactone	1.15289	44666.7	15.4469	up		Xanthine	1.10278	2.3456	1.22996	up		delta-Tridecalactone	1.16759	53000	15.6937	up
Isorhamnetin O-hexoside	1.16078	84.7413	6.40499	up		N-Acetyl tryptamine	1.15299	82925.9	16.3395	up		MAG (18:1) isomer2	1.10049	2.72295	1.44517	up		N-Acetyl tryptamine	1.16729	35074.1	15.0981	up
N-Acetyl tryptamine	1.16579	87555.6	16.4179	up		MAG (18:4) isomer1	1.11006	2.10667	1.07496	up		5-methoxyindole-3-carbaldehyde	1.14003	51111.1	15.6413	up		MAG (18:4) isomer1	1.16706	6559.26	12.6793	up
DGMG (18:2) isomer3	1.11486	5.81197	2.53903	up		5-methoxyindole-3-carbaldehyde	1.15293	51333.3	15.6476	up		O-Feruloyl 4-hydroxylcoumarin	1.07123	2.0026	1.00187	up		DGMG (18:2) isomer3	1.12978	3.53483	1.82164	up
Xanthine	1.09359	2.74934	1.45909	up		O-Feruloyl 4-hydroxylcoumarin	1.09869	2.72537	1.44645	up		5-Methoxy-N,N-dimethyltryptamine	1.12399	2.08	1.05658	up		Xanthine	1.06271	3.12311	1.64298	up
5-methoxyindole-3-carbaldehyde	1.16583	16333.3	13.9955	up		5-Methoxy-N,N-dimethyltryptamine	1.12709	2.62835	1.39416	up		Aspartic acid di-O-glucoside	1.01406	2.13784	1.09615	up		MAG (18:1) isomer2	1.14762	4.2648	2.09248	up
N-Caffeoyl putrescine	1.11687	8.3413	3.06027	up		N-formylmethionine	1.14607	14.0948	3.81709	up		N-formylmethionine	1.1292	25.8579	4.69253	up		5-methoxyindole-3-carbaldehyde	1.16766	31629.6	14.949	up
O-Feruloyl 4-hydroxylcoumarin	1.1652	52555.6	15.6816	up		N-p-Coumaroyl putrescine	1.15148	5.10782	2.35271	up		N-p-Coumaroyl putrescine	1.11674	4.68861	2.22916	up		5-Methoxy-N,N-dimethyltryptamine	1.12179	3.14478	1.65296	up
Hydroxy-methoxycinnamate	1.15103	32.6047	5.02701	up		N'-p-Coumaroyl agmatine	1.1308	5.69231	2.50901	up		N'-p-Coumaroyl agmatine	1.07311	2.97393	1.57237	up		N-formylmethionine	1.14973	34.4802	5.10769	up
5-Methoxy-N,N-dimethyltryptamine	1.03339	2.26287	1.17815	up		Agmatine	1.14058	4.13232	2.04695	up		N'-p-Coumaroyl putrescine	1.10943	4.7243	2.2401	up		N-p-Coumaroyl putrescine	1.15852	5.08209	2.34542	up
N-hexosyl-p-coumaroyl putrescine	1.15417	5.96785	2.57721	up		N-(4'-O-glycosyl)-p-coumaroyl agmatine	1.14969	2.58721	1.3714	up		N-p-Coumaroyl agmatine	1.0724	2.76106	1.46522	up		N'-p-Coumaroyl putrescine	1.15405	4.91286	2.29656	up
N-Sinapoyl putrescine	1.16581	265926	18.0207	up		N'-p-Coumaroyl putrescine	1.15029	4.94904	2.30715	up		Luteolin O-hexosyl-O-pentoside	1.11737	3.0117	1.59058	up		Syringetin 3-O-hexoside	1.15263	2.62136	1.39032	up
N-(4'-O-glycosyl)-p-coumaroyl agmatine	1.13763	4.39171	2.13478	up		N-p-Coumaroyl agmatine	1.13437	6.31925	2.65975	up		Luteolin O-sinapoylhexoside	1.1015	10.7456	3.42568	up		Luteolin O-hexosyl-O-pentoside	1.13032	2.60169	1.37945	up
Rosinidin O-hexoside	1.11091	3.58619	1.84245	up		Syringetin 3-O-hexoside	1.14697	2.42732	1.27936	up		Chrysoeriol O-sinapoylhexoside	1.13902	1035.56	10.0162	up		Luteolin O-sinapoylhexoside	1.09493	20.3493	4.34691	up
Syringetin 3-O-hexoside	1.15796	7.41497	2.89044	up		Luteolin O-hexosyl-O-pentoside	1.02805	2.17483	1.1209	up		Isorhamnetin 5-O-hexoside	1.14007	228148	17.7996	up		Isorhamnetin 5-O-hexoside	1.15204	6.77746	2.76075	up
Luteolin O-hexosyl-O-pentoside	1.16236	14.9061	3.89784	up		Isorhamnetin 5-O-hexoside	1.13881	9.84733	3.29973	up		Chrysoeriol O-hexosyl-O-pentoside	1.13997	160000	17.2877	up		Chrysoeriol O-hexosyl-O-pentoside	1.16722	231111	17.8182	up
Luteolin O-sinapoylhexoside	1.16545	33037	15.0118	up		Chrysoeriol O-hexosyl-O-pentoside	1.12661	9.51432	3.2501	up		Kaempferol 3-O-glucoside (Astragalin)	1.09267	5.74834	2.52315	up		Kaempferol 3-O-glucoside (Astragalin)	1.16704	272963	18.0583	up
Isorhamnetin 5-O-hexoside	1.16577	82.7336	6.3704	up		8-C-hexosyl-hesperetin O-hexoside	1.15135	18388.9	14.1665	up		8-C-hexosyl-hesperetin O-hexoside	1.13998	22000	14.4252	up		Chrysoeriol O-malonylhexoside	1.15034	3.9976	1.99913	up
Chrysoeriol O-hexosyl-O-pentoside	1.16239	96.4967	6.59241	up		C-hexosyl-luteolin O-hexoside	1.02421	2.14286	1.09954	up		C-hexosyl-luteolin C-pentoside	1.05212	3.13815	1.64991	up		8-C-hexosyl-hesperetin O-hexoside	1.16727	78370.4	16.258	up
Kaempferol 3-O-glucoside (Astragalin)	1.12224	5.61877	2.49026	up		6-C-hexosyl-luteolin O-hexoside	1.15276	55037	15.7481	up		6-C-hexosyl luteolin O-pentoside	1.11286	2.75721	1.46321	up		C-hexosyl-luteolin O-hexoside	1.13049	4.40299	2.13848	up
8-C-hexosyl-hesperetin O-hexoside	1.16566	42333.3	15.3695	up		C-hexosyl-luteolin C-pentoside	1.12114	5.19124	2.37608	up		C-rhamnosyl-acacetin O-p-coumaroylhexoside	1.08405	6.8088	2.7674	up		C-hexosyl-luteolin C-pentoside	1.14502	7.40331	2.88817	up
C-hexosyl-luteolin O-hexoside	1.14276	22.4425	4.48816	up		6-C-hexosyl luteolin O-pentoside	1.09841	3.61694	1.85477	up		8-C-hexosyl-luteolin O-hexoside	1.13902	5700	12.4767	up		6-C-hexosyl luteolin O-pentoside	1.12792	6.55581	2.71277	up
6-C-hexosyl chrysoeriol O-hexoside	1.16524	45333.3	15.4683	up		8-C-hexosyl-luteolin O-hexoside	1.15238	18296.3	14.1593	up		Chrysoeriol 8-C-hexoside	1.05853	2.80285	1.48689	up		C-rhamnosyl-acacetin O-p-coumaroylhexoside	1.15886	6.79753	2.76501	up
C-hexosyl-luteolin C-pentoside	1.14466	36.4205	5.18668	up		Luteolin 8-C-hexosyl-O-hexoside	1.15297	78740.7	16.2648	up		Quercetin 5-O-malonylhexosyl-hexoside	1.14005	8807.41	13.1045	up		Luteolin 8-C-hexosyl-O-hexoside	1.16772	71703.7	16.1298	up
6-C-hexosyl luteolin O-pentoside	1.16516	122074	16.8974	up		C-hexosyl-luteolin O-sinapic acid	1.14606	9718.52	13.2465	up		Quercetin 7-O-malonylhexosyl-hexoside	1.13999	10663	13.3803	up		C-hexosyl-luteolin O-sinapic acid	1.10664	19.4759	4.28362	up
8-C-hexosyl-luteolin O-hexoside	1.12799	13.8132	3.78798	up		Chrysoeriol 8-C-hexoside	1.10765	4.26224	2.09161	up		Quercetin 7-O-rutinoside	1.13439	22.381	4.4842	up		Chrysoeriol 8-C-hexoside	1.14733	9.15101	3.19393	up
Luteolin 8-C-hexosyl-O-hexoside	1.16587	94777.8	16.5323	up		Quercetin 5-O-malonylhexosyl-hexoside	1.1528	9644.44	13.2355	up		Tricin di-O-hexoside	1.13985	12922.2	13.6576	up		Quercetin 5-O-malonylhexosyl-hexoside	1.16728	24592.6	14.5859	up
C-hexosyl-luteolin O-sinapic acid	1.16485	29703.7	14.8584	up		Quercetin 7-O-malonylhexosyl-hexoside	1.15278	18555.6	14.1796	up		Tricin 7-O-hexoside	1.13972	181481	17.4695	up		Quercetin 7-O-malonylhexosyl-hexoside	1.16735	13000	13.6662	up
Chrysoeriol 8-C-hexoside	1.15758	31.4255	4.97386	up		Quercetin 7-O-rutinoside	1.14622	31.1765	4.96239	up		5-O-p-Coumaroyl shikimic acid	1.03058	2.45632	1.2965	up		Quercetin 7-O-rutinoside	1.16629	186.989	7.54681	up
Quercetin 5-O-malonylhexosyl-hexoside	1.16541	30555.6	14.8991	up		Tricin di-O-hexoside	1.15146	7677.78	12.9065	up		3-O-Feruloyl quinic acid	1.10838	2.51478	1.33043	up		Tricin di-O-hexoside	1.01146	113.581	6.82758	up
Quercetin 7-O-malonylhexosyl-hexoside	1.16535	45407.4	15.4706	up		Tricin 7-O-hexoside	1.15239	73111.1	16.1578	up		Anisic acid O-feruloyl hexoside	1.14007	15074.1	13.8798	up		Tricin 7-O-hexoside	1.16769	434815	18.73	up
Quercetin 7-O-rutinoside	1.16282	102.908	6.68522	up		Anisic acid O-feruloyl hexoside	1.15276	7388.89	12.8511	up		N-hexosyl-p-coumaroyl serotonin	1.12263	3.93763	1.97733	up		Anisic acid O-feruloyl hexoside	1.0797	2.17257	1.1194	up
Tricin di-O-hexoside	1.16483	52481.5	15.6795	up		N-hexosyl-p-coumaroyl serotonin	1.14176	5.07251	2.3427	up		N-Feruloyl serotonin	1.06304	4.72328	2.23979	up		N-hexosyl-p-coumaroyl serotonin	1.12159	6.0292	2.59197	up
Tricin 7-O-hexoside	1.16273	500741	18.9337	up		N-Feruloyl tyramine	1.12333	11.3727	3.5075	up		N-Feruloyl tyramine	1.0454	2.60787	1.38287	up		N-Feruloyl serotonin	1.14537	7.91585	2.98475	up
3-O-Feruloyl quinic acid	1.16533	13840.7	13.7566	up		N-hydroxy tryptamine	1.14619	12.9667	3.69674	up		N-hydroxy tryptamine	1.11789	30.4204	4.92697	up		N-hydroxy tryptamine	1.14888	27.1207	4.76132	up
N-hexosyl-p-coumaroyl serotonin	1.14075	10.3013	3.36476	up		Pyridoxine O-glucoside	1.14423	2.29221	1.19674	up		Niacinamide	1.09417	2.57576	1.365	up		6,7-dihydroxycoumarin 6-O-quinic acid	1.16617	11492.6	13.4884	up
N-Feruloyl serotonin	1.15992	118.02	6.88288	up		Niacinamide	1.14885	2.79169	1.48114	up		4-Pyridoxic acid O-hexoside	1.12273	2.95666	1.56397	up		3-Indoleacetonitrile	1.0421	2.27576	1.18635	up
N-Feruloyl tyramine	1.15265	45.7017	5.51418	up		4-Pyridoxic acid O-hexoside	1.15138	3.60807	1.85123	up		6,7-dihydroxycoumarin 6-O-quinic acid	1.13999	13588.9	13.7301	up		LysoPC 16:0	1.01182	2.09829	1.06921	up
N-hydroxy tryptamine	1.1507	29.2022	4.86801	up		6,7-dihydroxycoumarin 6-O-quinic acid	1.15211	19925.9	14.2824	up		LysoPC 16:1 (2n isomer)	1.13069	7.48977	2.90492	up		LysoPC 18:1 (2n isomer)	1.13385	2.75579	1.46247	up
Piperidine	1.13698	2.22945	1.15669	up		LysoPC 16:1 (2n isomer)	1.13996	4.27264	2.09513	up		LysoPC 18:2	1.11149	2.11591	1.08128	up		LysoPC 18:1	1.1298	2.25709	1.17447	up
Pyridoxine O-glucoside	1.15477	3.86111	1.94902	up		LysoPC 16:0	1.10621	3.23816	1.69517	up		LysoPC 16:0	1.08629	2.50127	1.32266	up		N'-Feruloyl putrescine	1.11322	4.75829	2.25044	up
4-Pyridoxic acid O-hexoside	1.16513	7.41447	2.89034	up		LysoPC 16:2 (2n isomer)	1.1396	5.05123	2.33663	up		LysoPE 18:1 (2n isomer)	1.01471	2.44281	1.28854	up		N-Feruloyl putrescine	1.08644	3.36782	1.75181	up
Methoxyindoleacetic acid	1.0739	3.07315	1.61972	up		LysoPC 18:3 (2n isomer)	1.14185	2.94585	1.55868	up		LysoPC 18:1 (2n isomer)	1.12366	6.54262	2.70987	up		O-Feruloyl 2-hydroxylcoumarin	1.16768	64296.3	15.9724	up
LysoPC 16:0	1.12104	2.71004	1.43831	up		LysoPE 16:0	1.04979	2.00904	1.00651	up		LysoPC 16:2 (2n isomer)	1.12877	7.1753	2.84304	up		L-Glutaminyl-L-valyl-L-valyl-L-cysteine	1.15118	4.17706	2.06249	up
LysoPE 16:0	1.14912	3.75866	1.91022	up		O-Feruloyl 2-hydroxylcoumarin	1.15188	19629.6	14.2607	up		LysoPC 18:3 (2n isomer)	1.03701	2.38408	1.25343	up		MAG (18:4) isomer3	1.16717	5237.04	12.3545	up
LysoPE 18:0	1.14474	4.26167	2.09142	up		MGMG (18:2) isomer2	1.15031	2.59369	1.37501	up		LysoPC 18:2 (2n isomer)	1.10193	3.55	1.82782	up		MGMG (18:2) isomer1	1.09359	2.21855	1.14962	up
Lysine butyrate	1.13954	2.75175	1.46035	up		LysoPC 17:0	1.116	4.24038	2.08419	up		LysoPE 16:0	1.05765	2.02904	1.02079	up		LysoPC 19:0	1.09421	3.19781	1.67708	up
MGMG (18:2) isomer1	1.1082	3.75265	1.90791	up		9-HOTrE	1.11463	3.24051	1.69622	up		LysoPC 18:1	1.12051	5.05947	2.33899	up		MAG (18:1) isomer1	1.15849	4.05498	2.0197	up
MGMG (18:2) isomer2	1.08069	2.94714	1.55931	up		Syringaldehyde	1.14621	6.08958	2.60634	up		Punicic acid	1.13757	3.82174	1.93423	up		LysoPC 18:0 (2n isomer)	1.13515	2.71429	1.44057	up
LysoPC 17:0	1.15604	8.78735	3.13543	up		Caftaric acid	1.12785	6.43902	2.68684	up		O-Feruloyl 2-hydroxylcoumarin	1.14021	46259.3	15.4975	up		Myristoleic acid (C14:1)	1.02468	2.47517	1.30753	up
3,4-Dimethoxycinnamic acid	1.16367	2822.22	11.4626	up		4-O-Caffeoyl quinic acid (criptochlorogenic acid)	1.11752	5.11917	2.35591	up		MAG (18:4) isomer3	1.13948	7440.74	12.8612	up		9-HOTrE	1.1134	8.32672	3.05775	up
Anthranilate O-hexosyl-O-hexoside	1.12872	2.83992	1.50585	up		Luteolin O-hexosyl-O-hexosyl-O-hexoside	1.153	3422.22	11.7407	up		LysoPC 19:0	1.11954	8.20811	3.03705	up		9-KODE	1.11232	4.01168	2.00421	up
Syringaldehyde	1.15225	8.37394	3.06591	up		Cyanidin O-acetylhexoside	1.15216	1346.67	10.3952	up		MAG (18:1) isomer1	1.09526	2.47574	1.30786	up		4-Methoxycinnamic acid	1.16729	2188.89	11.096	up
Gallic acid O-Hexoside	1.12036	9.34622	3.22438	up		Peonidin O-malonylhexoside	1.15291	7366.67	12.8468	up		LysoPC 18:0 (2n isomer)	1.12053	6.84405	2.77485	up		Syringaldehyde	1.162	10355.6	13.3381	up
Caftaric acid	1.1636	9.01743	3.17272	up		Chrysoeriol C-pentosyl-O-hexosyl-O-hexoside	1.10533	6.52442	2.70585	up		Myristoleic acid (C14:1)	1.11498	3.6726	1.8768	up		Gallic acid O-Hexoside	1.1138	4.3029	2.10531	up
4-O-Caffeoyl quinic acid (criptochlorogenic acid)	1.12805	2.27307	1.18464	up		Hesperetin O-malonylhexoside	1.10885	2.87056	1.52133	up		9,10-EODE	1.11592	2.15238	1.10593	up		Caftaric acid	1.16362	3.12645	1.64453	up
1-O-beta-D-Glucopyranosyl sinapate	1.05463	10.1852	3.3484	up		Eriodictyol C-hexoside	1.11233	2.34468	1.22939	up		9-HOTrE	1.13674	8.76475	3.13171	up		4-O-Caffeoyl quinic acid (criptochlorogenic acid)	1.16145	5.97614	2.57921	up
Luteolin O-hexosyl-O-hexosyl-O-hexoside	1.16592	3229.63	11.6572	up		Luteolin C-hexoside	1.11999	8.96631	3.16451	up		9-KODE	1.13414	4.4351	2.14897	up		Peonidin O-malonylhexoside	1.16767	20111.1	14.2957	up
Peonidin O-malonylhexoside	1.16588	6725.93	12.7155	up		Quercetin O-acetylhexoside	1.00866	144.866	7.17858	up		9-HpOTrE	1.07218	2.60745	1.38264	up		Hesperetin O-Glucuronic acid	1.11257	2.03461	1.02475	up
Chrysoeriol C-pentosyl-O-hexosyl-O-hexoside	1.16034	45.3083	5.5017	up		Tricin O-sinapic acid	1.15113	26.2036	4.71169	up		4-Methoxycinnamic acid	1.07682	2.87425	1.52319	up		Chrysoeriol C-pentosyl-O-hexosyl-O-hexoside	1.14338	6.88237	2.7829	up
Hesperetin O-malonylhexoside	1.15509	4.29221	2.10172	up		5-O-p-coumaroyl quinic acid O-hexoside	1.15276	4114.81	12.0066	up		12,13-EODE	1.11586	3.64163	1.86458	up		Chrysoeriol 7-O-hexoside	1.16743	14703.7	13.8439	up
Acacetin O-acetyl hexoside	1.16589	105037	16.6805	up		5-O-p-coumaroyl shikimic acid O-hexoside	1.15212	15018.5	13.8745	up		Syringaldehyde	1.1191	8.46049	3.08074	up		Isorhamnetin O-acetyl-hexoside	1.01604	140.437	7.13378	up
Chrysoeriol O-acetylhexoside	1.13884	5.03058	2.33072	up		1-O-p-Coumaroyl quinic acid	1.15267	88259.3	16.4295	up		Gallic acid O-Hexoside	1.10052	2.77127	1.47055	up		Eriodictyol C-hexoside	1.15373	5.45386	2.44728	up
Isorhamnetin O-acetyl-hexoside	1.08166	1257.85	10.2967	up		O-p-Coumaroyl quinic acid O-rutinoside derivative	1.10433	8.32098	3.05675	up		Caftaric acid	1.13831	4.63124	2.2114	up		Luteolin C-hexoside	1.14768	12.7803	3.67585	up
Luteolin C-hexoside	1.15622	116.645	6.86598	up		3-O-p-Coumaroyl quinic acid	1.15269	15.0268	3.90947	up		4-O-Caffeoyl quinic acid (criptochlorogenic acid)	1.13664	7.01613	2.81068	up		Quercetin O-acetylhexoside	1.1676	51037	15.6393	up
Quercetin O-acetylhexoside	1.1656	94518.5	16.5283	up		α-Linolenic acid	1.15051	3533.33	11.7868	up		Peonidin O-malonylhexoside	1.14018	9744.44	13.2504	up		Tricin O-sinapic acid	1.14353	6.41079	2.6805	up
Tricin O-sinapic acid	1.1657	119259	16.8637	up		2'-Deoxyinosine-5'-monophosphate	1.12588	2.99242	1.58131	up		Chrysoeriol C-pentosyl-O-hexosyl-O-hexoside	1.07411	4.40495	2.13913	up		Tricin O-saccharic acid	1.10874	6.67347	2.73844	up
Homovanilloyl quinic acid	1.16558	10525.9	13.3617	up		LysoPC 20:1	1.153	49148.1	15.5848	up		Hesperetin O-malonylhexoside	1.13992	3748.15	11.872	up		Homovanilloyl quinic acid	1.16768	8848.15	13.1112	up
5-O-p-coumaroyl quinic acid O-hexoside	1.16572	4396.3	12.1021	up		Hesperetin 7-O-neohesperidoside (Neohesperidin)	1.15284	44296.3	15.4349	up		Isorhamnetin O-acetyl-hexoside	1.13737	25.0091	4.64438	up		5-O-p-coumaroyl quinic acid O-hexoside	1.13465	3.84876	1.94439	up
1-O-p-Coumaroyl quinic acid	1.16525	39037	15.2526	up		Purine	1.15051	8.82332	3.14132	up		Luteolin C-hexoside	1.1032	6.70097	2.74437	up		3-O-p-Coumaroyl quinic acid	1.15724	11.9001	3.57291	up
3-O-p-Coumaroyl quinic acid	1.1653	197778	17.5935	up		L-(+)-Arginine	1.12203	2.36295	1.24059	up		Quercetin O-acetylhexoside	1.13905	30629.6	14.9026	up		Vanillic acid	1.12785	2.2846	1.19194	up
Syringic acid O-glucoside	1.08396	8.1427	3.02551	up		Quinine	1.15166	16.8557	4.07517	up		Tricin O-sinapic acid	1.12604	10.1538	3.34395	up		α-Linolenic acid	1.16768	4025.93	11.9751	up
Vanillic acid	1.14874	4.62841	2.21052	up		Luteolin	1.15244	20444.4	14.3194	up		Tricin O-saccharic acid	1.11997	6.19132	2.63025	up		2'-Deoxyinosine-5'-monophosphate	1.16388	9.30591	3.21815	up
2'-Deoxyinosine-5'-monophosphate	1.11846	6.45138	2.68961	up		Dihydrouracil	1.10489	3.26869	1.70871	up		Homovanilloyl quinic acid	1.1402	15259.3	13.8974	up		LysoPC 20:4	1.10644	2.23693	1.16152	up
Spermine	1.1318	2.10977	1.07709	up		Quercetin 3-O-rutinoside (Rutin)	1.13408	33.6203	5.07126	up		5-O-p-coumaroyl quinic acid O-hexoside	1.09742	2.86499	1.51853	up		Hesperetin 7-O-neohesperidoside (Neohesperidin)	1.16638	90.1706	6.49459	up
LysoPE 16:0 (2n isomer)	1.13623	2.47949	1.31004	up		2-Methylsuccinic acid	1.14618	2.99939	1.58467	up		5-O-p-coumaroyl shikimic acid O-hexoside	1.14009	9744.44	13.2504	up		Quinine	1.16409	46.3807	5.53545	up
Purine	1.14192	7.30184	2.86826	up		4-Guanidinobutyric acid	1.14975	2.46769	1.30316	up		1-O-p-Coumaroyl quinic acid	1.14001	61333.3	15.9044	up		Quercetin 3-O-rutinoside (Rutin)	1.16656	186.618	7.54395	up
L-Phenylalanine	1.10886	2.02455	1.0176	up		4-Ethylbenzoic acid	1.15306	115222	16.8141	up		O-p-Coumaroyl quinic acid O-rutinoside derivative	1.06482	5.42909	2.44071	up		trans-4-Hydroxy-L-proline	1.06492	2.75214	1.46055	up
L-(+)-Lysine	1.14542	5.04202	2.334	up		Dl-2-Aminooctanoic acid	1.14282	2.09567	1.06741	up		3-O-p-Coumaroyl quinic acid	1.12957	24.0688	4.58909	up		2-Methylsuccinic acid	1.15689	4.19291	2.06795	up
L-(-)-Tyrosine	1.11331	3.58616	1.84244	up		Chrysoeriol	1.15162	10451.9	13.3515	up		α-Linolenic acid	1.14006	5211.11	12.3474	up		4-Ethylbenzoic acid	1.16762	92925.9	16.5038	up
L-Histidine	1.16402	6.4974	2.69986	up		Kaempferol 3-O-rutinoside (Nicotiflorin)	1.06343	2.22965	1.15682	up		2'-Deoxyinosine-5'-monophosphate	1.11859	8.6602	3.1144	up		Dl-2-Aminooctanoic acid	1.16207	2.19127	1.13177	up
L-Isoleucine	1.13831	2.6164	1.38758	up		Naringenin 7-O-glucoside (Prunin)	1.14196	21.9039	4.45311	up		LysoPC 20:4	1.11843	5.51422	2.46316	up		Coniferylaldehyde	1.14054	2.52796	1.33798	up
L-(+)-Arginine	1.1616	6.26447	2.64719	up		Chlorogenic acid (3-O-Caffeoylquinic acid)	1.13324	29.6841	4.89162	up		LysoPC 14:0 (2n isomer)	1.13594	6.09319	2.6072	up		Chrysoeriol	1.16762	53925.9	15.7187	up
L-Tryptophan	1.09418	2.70611	1.43622	up		Nicotinic acid	1.13077	2.91116	1.54159	up		LysoPC 16:0 (2n isomer)	1.12528	6.84426	2.7749	up		Kaempferol 3-O-rutinoside (Nicotiflorin)	1.12493	2.71795	1.44252	up
DL-homocysteine	1.15928	5.36432	2.4234	up		Inosine	1.15249	2.17603	1.1217	up		LysoPC 18:0	1.08615	7.46384	2.89992	up		Naringenin 7-O-glucoside (Prunin)	1.1585	6.91657	2.79006	up
Quinine	1.16559	278889	18.0893	up		2-Picolinic acid	1.13621	2.47414	1.30693	up		LysoPC 20:1 (2n isomer)	1.02277	3.25354	1.70201	up		Chlorogenic acid (3-O-Caffeoylquinic acid)	1.11842	8.52109	3.09104	up
Guanidineacetic acid	1.12761	4.77364	2.25509	up		L-Tryptamine	1.15295	671481	19.357	up		LysoPC 20:1	1.13991	49629.6	15.5989	up		5-Hydroxy-L-tryptophan	1.11523	2.71166	1.43918	up
Luteolin	1.16556	131185	17.0012	up		Resveratrol	1.15299	37555.6	15.1967	up		LysoPE 14:0 (2n isomer)	1.14012	1222.22	10.2553	up		Pyridoxine 5'-phosphate	1.07923	8.14195	3.02537	up
5-Methylcytosine	1.10723	2.06667	1.04731	up		Kumatakenin	1.15098	3062.96	11.5807	up		Hesperetin 7-O-neohesperidoside (Neohesperidin)	1.14017	111667	16.7688	up		L-Tryptamine	1.16772	241852	17.8838	up
N6-Acetyl-L-lysine	1.07653	3.40841	1.7691	up		Kaempferol 7-O-rhamnoside	1.15303	62851.9	15.9397	up		Purine	1.12135	11.2454	3.49127	up		Resveratrol	1.16753	68333.3	16.0603	up
Nα-Acetyl-L-arginine	1.10854	2.90003	1.53607	up		Dihydroquercetin (Taxifolin)	1.15297	12459.3	13.6049	up		L-Proline	1.08633	2.44731	1.29119	up		Epigallate catechin gallate (EGCG)	1.16754	30555.6	14.8991	up
N-Propionylglycine	1.11826	2.45455	1.29546	up		Isorhamnetin 3-O-neohesperidoside	1.14846	40.029	5.32297	up		Adenine	1.12716	2.8399	1.50584	up		Kumatakenin	1.16753	3814.81	11.8974	up
Quercetin 3-O-rutinoside (Rutin)	1.15899	114.879	6.84397	up		Genistein (4',5,7-Trihydroxyisoflavone)	1.15302	1.57407e+06	20.5861	up		Quinine	1.13994	24.8932	4.63768	up		Kaempferol 7-O-rhamnoside	1.16744	118185	16.8507	up
L-Asparagine	1.13821	3.28038	1.71386	up		Eriodictyol	1.1527	20222.2	14.3037	up		Guanidineacetic acid	1.05462	2.88616	1.52915	up		Dihydroquercetin (Taxifolin)	1.16771	5733.33	12.4852	up
4-Guanidinobutyric acid	1.14335	2.19468	1.13401	up		Kaempferol 3-O-robinobioside (Biorobin)	1.0781	2.71116	1.43891	up		N-Acetyl-L-glutamic acid	1.13462	3.01218	1.59081	up		Isorhamnetin 3-O-neohesperidoside	1.16282	69.2921	6.11462	up
4-Ethylbenzoic acid	1.16593	114889	16.8099	up		3-Hydroxy-3-methyl butyric acid	1.12481	2.38348	1.25307	up		Luteolin	1.1399	18963	14.2109	up		Genistein (4',5,7-Trihydroxyisoflavone)	1.16764	680000	19.3752	up
Dl-2-Aminooctanoic acid	1.12251	2.0892	1.06295	up		Methyl benzoate	1.15303	21629.6	14.4007	up		5-Aminovaleric acid	1.04368	2.06145	1.04366	up		Hesperetin 5-O-glucoside	1.15814	6.06137	2.59964	up
Chrysoeriol	1.16574	36296.3	15.1475	up		Chlorogenic acid methyl ester	1.11364	6.15335	2.62137	up		Dihydrouracil	1.09178	2.05204	1.03706	up		Kaempferol 3-O-robinobioside (Biorobin)	1.06891	2.37875	1.25021	up
Naringenin 7-O-glucoside (Prunin)	1.15349	5.0944	2.34891	up		Neochlorogenic acid (5-O-Caffeoylquinic acid)	1.13328	53.1972	5.73328	up		Quercetin 3-O-rutinoside (Rutin)	1.13155	21.0995	4.39914	up		Methyl benzoate	1.16757	19740.7	14.2689	up
3-Hydroxy-4-methoxycinnamic acid	1.14726	5.17967	2.37286	up		Riboflavin	1.15201	12011.1	13.5521	up		N-Acetyl-l-leucine	1.12872	2.88957	1.53086	up		Chlorogenic acid methyl ester	1.15348	15.7487	3.97716	up
D-Sorbitol	1.07304	2.12691	1.08876	up		serotonin	1.14502	14.3795	3.84594	up		2-Methylsuccinic acid	1.13321	2.48378	1.31253	up		Neochlorogenic acid (5-O-Caffeoylquinic acid)	1.13169	19.4371	4.28074	up
Phloretin	1.16056	1761.11	10.7823	up		Dulcitol	1.15243	2.89515	1.53364	up		Maleic acid	1.09662	2.27564	1.18627	up		serotonin	1.14918	26.7016	4.73885	up
5-Hydroxy-L-tryptophan	1.16527	10314.8	13.3324	up		Ellagic acid	1.15104	2651.85	11.3728	up		4-Ethylbenzoic acid	1.14013	88777.8	16.4379	up		Hesperetin	1.16019	11.3126	3.49986	up
L-Tryptamine	1.1656	609259	19.2167	up		Putrescine	1.12941	2.58249	1.36876	up		Chrysoeriol	1.13963	6674.07	12.7044	up		Luteolin 7-O-glucoside (Cynaroside)	1.13608	11.662	3.54375	up
Resveratrol	1.16594	23925.9	14.5463	up		Hesperetin	1.1527	248148	17.9208	up		Kaempferol 3-O-rutinoside (Nicotiflorin)	1.04135	2.1126	1.07902	up		Protocatechuic aldehyde	1.04899	2.68972	1.42746	up
Kumatakenin	1.16592	8140.74	12.9909	up		Phenethylamine	1.15082	4.43402	2.14861	up		Naringenin 7-O-glucoside (Prunin)	1.09774	11.8878	3.5714	up		1-O-Caffeoyl quinic acid	1.12894	19.3542	4.27457	up
Kaempferol 7-O-rhamnoside	1.16556	32777.8	15.0004	up		Luteolin 7-O-glucoside (Cynaroside)	1.02792	9.34607	3.22436	up		Naringenin	1.10206	3.74363	1.90444	up		4-Hydroxybenzoic acid	1.13178	4.30459	2.10587	up
Dihydroquercetin (Taxifolin)	1.16585	23370.4	14.5124	up		Protocatechuic aldehyde	1.10972	2.79061	1.48058	up		Chlorogenic acid (3-O-Caffeoylquinic acid)	1.113	8.98266	3.16714	up		Hesperetin 7-rutinoside (Hesperidin)	1.03911	277.941	8.11863	up
Isorhamnetin 3-O-neohesperidoside	1.1546	28.5761	4.83674	up		4-Pyridoxic acid	1.14446	4.48848	2.16623	up		Syringic acid	1.13675	4.29173	2.10156	up		Aromadedrin (Dihydrokaempferol)	1.10932	3.34571	1.74231	up
Genistein (4',5,7-Trihydroxyisoflavone)	1.16589	1.05593e+06	20.0101	up		N-Acetylputrescine	1.14582	4.17703	2.06248	up		Vanillin	1.10225	2.11037	1.07749	up		1-Methyladenine	1.15586	2.75347	1.46125	up
Eriodictyol	1.16578	32592.6	14.9923	up		1,1-Dimethylbiguanide	1.1182	2.43218	1.28225	up		Nicotinic acid	1.13053	6.61126	2.72493	up		Quercetin 4'-O-glucoside (Spiraeoside)	1.16027	13.3395	3.73764	up
Hesperetin 5-O-glucoside	1.16002	3.15969	1.65978	up		1-O-Caffeoyl quinic acid	1.13551	55.3925	5.79162	up		Inosine	1.13402	2.27256	1.18432	up		trans,trans-Muconic acid	1.11256	3.72425	1.89695	up
Kaempferol 3-O-robinobioside (Biorobin)	1.13746	2.34416	1.22907	up		4-Hydroxybenzoic acid	1.13312	3.59708	1.84683	up		2-Picolinic acid	1.13442	7.90099	2.98203	up		Quercetin 3-O-glucoside (Isotrifoliin)	1.16235	6.40732	2.67972	up
3-Hydroxy-3-methyl butyric acid	1.1381	2.83226	1.50195	up		Hesperetin 7-rutinoside (Hesperidin)	1.15224	12740.7	13.6372	up		5-Hydroxy-L-tryptophan	1.10358	2.11899	1.08337	up		Delphinidin 3-O-rutinoside (Tulipanin)	1.1676	4481.48	12.1298	up
Methyl benzoate	1.16586	21888.9	14.4179	up		Aromadedrin (Dihydrokaempferol)	1.12191	14.3122	3.83917	up		8-Hydroxyguanosine	1.06806	2.03661	1.02617	up		Kaempferol 3-O-galactoside (Trifolin)	1.14254	10.8347	3.43759	up
Chlorogenic acid methyl ester	1.09741	9.23974	3.20785	up		1-Methyladenine	1.14786	2.23514	1.16036	up		L-Tryptamine	1.14011	540370	19.0436	up		Tricetin	1.16677	6818.52	12.7352	up
Neochlorogenic acid (5-O-Caffeoylquinic acid)	1.16161	586296	19.1613	up		Quercetin 4'-O-glucoside (Spiraeoside)	1.12179	5.10117	2.35083	up		Resveratrol	1.14017	68111.1	16.0556	up		Allysine(6-Oxo DL-Norleucine)	1.16228	8.15356	3.02743	up
serotonin	1.14425	28.7927	4.84763	up		2'-Deoxyadenosine-5'-monophosphate	1.14427	2.0352	1.02517	up		Epigallate catechin gallate (EGCG)	1.13964	5692.59	12.4749	up		Esculetin (6,7-dihydroxycoumarin)	1.07164	12.157	3.60372	up
Quinic acid	1.15487	2.17026	1.11787	up		Delphinidin 3-O-rutinoside (Tulipanin)	1.15271	5370.37	12.3908	up		Kumatakenin	1.13995	3525.93	11.7838	up		Sinapinaldehyde	1.12327	4.04657	2.0167	up
Orotic acid	1.15588	2.98553	1.57799	up		Kaempferol 3-O-galactoside (Trifolin)	1.02431	8.69676	3.12048	up		Kaempferol 7-O-rhamnoside	1.14021	97777.8	16.5772	up		Homoeriodictyol	1.16759	10788.9	13.3973	up
Dulcitol	1.14462	4.34431	2.11913	up		Tricetin	1.15306	1537.04	10.5859	up		Dihydroquercetin (Taxifolin)	1.14011	6681.48	12.706	up		D-glucoronic acid	1.15932	10.405	3.3792	up
Ellagic acid	1.16434	10518.5	13.3606	up		Allysine(6-Oxo DL-Norleucine)	1.15259	20.885	4.38439	up		Isorhamnetin 3-O-neohesperidoside	1.13743	24.6222	4.62189	up		Guanosine 3',5'-cyclic monophosphate	1.08728	5.7363	2.52012	up
Guanosine monophosphate	1.05074	2.43324	1.28288	up		Esculetin (6,7-dihydroxycoumarin)	1.13455	14.8889	3.89616	up		Genistein (4',5,7-Trihydroxyisoflavone)	1.14021	1.28889e+06	20.2977	up		7-methylguanine	1.15766	5.17606	2.37185	up
Hesperetin	1.16571	197037	17.5881	up		Esculin (6,7-Dihydroxycoumarin-6-glucoside)	1.03821	2.37573	1.24837	up		Eriodictyol	1.14014	53851.9	15.7167	up		N-Caffeoyl agmatine	1.13819	0.0749491	-3.73795	down
N-Acetyl-L-tyrosine	1.06615	2.35833	1.23777	up		Sinapinaldehyde	1.13076	3.22609	1.68979	up		Methyl benzoate	1.14013	21037	14.3606	up		D(-)-Threose	1.11764	0.488263	-1.03427	down
4-Pyridoxic acid	1.15964	6.15222	2.62111	up		Homoeriodictyol	1.15233	4200	12.0362	up		Chlorogenic acid methyl ester	1.13412	17.9043	4.16223	up		Sinapoyl malate	1.16765	1.36226e-07	-22.8075	down
NADP	1.15771	2.84211	1.50696	up		Butin	1.13923	9.36654	3.22752	up		Neochlorogenic acid (5-O-Caffeoylquinic acid)	1.13445	45.5725	5.51009	up		N', N''-di-p-coumaroylspermidine	1.15746	0.172923	-2.5318	down
Indole-3-carboxaldehyde	1.06888	2.36525	1.24199	up		Daphnetin	1.13976	6.0623	2.59987	up		Riboflavin	1.14016	28333.3	14.7902	up		Chrysin O-malonylhexoside	1.16771	5.04673e-05	-14.2743	down
1,1-Dimethylbiguanide	1.13152	2.18156	1.12536	up		Guanosine 3',5'-cyclic monophosphate	1.04902	2.02445	1.01753	up		Diethylglutarate	1.11959	2.6168	1.3878	up		C-pentosyl-C-hexosyl-apigenin	1.1601	0.165049	-2.59904	down
Aromadedrin (Dihydrokaempferol)	1.14993	8.46424	3.08138	up		N-Caffeoyl agmatine	1.1526	3.83523e-07	-21.3142	down		serotonin	1.11394	27.1259	4.7616	up		Apigenin C-glucoside	1.11423	0.46125	-1.11638	down
Quercetin 4'-O-glucoside (Spiraeoside)	1.16421	28.8438	4.85019	up		Sinapoyl malate	1.15296	2.21493e-06	-18.7843	down		Dulcitol	1.1024	3.03993	1.60404	up		Nicotinic acid-hexoside	1.1669	0.12115	-3.04513	down
2'-Deoxyadenosine-5'-monophosphate	1.1626	3.83321	1.93855	up		N-Caffeoylspermidine	1.15204	7.88782e-06	-16.9519	down		Ellagic acid	1.14021	1429.63	10.4814	up		N-sinapoyl cadaverine	1.16762	2.65226e-05	-15.2024	down
Quercetin 3-O-glucoside (Isotrifoliin)	1.15964	3.60335	1.84934	up		Chrysin O-malonylhexoside	1.15298	4.34084e-05	-14.4917	down		Hesperetin	1.14018	370741	18.5001	up		Chrysin O-hexoside	1.16772	4.8474e-06	-17.6544	down
Delphinidin 3-O-rutinoside (Tulipanin)	1.16451	3751.85	11.8734	up		Apigenin C-glucoside	1.10873	0.340439	-1.55453	down		Phenethylamine	1.13648	3.9864	1.99509	up		O-methylnaringenin C-pentoside	1.13245	0.401802	-1.31544	down
Tricetin	1.16589	1585.19	10.6304	up		Nicotinic acid-hexoside	1.15204	0.0919488	-3.44303	down		Luteolin 7-O-glucoside (Cynaroside)	1.05292	6.363	2.66971	up		Methylglutaric acid	1.15482	0.151906	-2.71875	down
p-Coumaryl alcohol	1.16355	2055.56	11.0053	up		N-sinapoyl cadaverine	1.15301	5.86957e-05	-14.0564	down		Protocatechuic aldehyde	1.09643	3.10887	1.63639	up		C-hexosyl-apigenin O-hexosyl-O-hexoside	1.11569	0.118609	-3.07572	down
Allysine(6-Oxo DL-Norleucine)	1.1638	22.6216	4.49963	up		Xanthurenic acid	1.15268	0.000117493	-13.0551	down		(5-L-Glutamyl)-L-amino acid	1.11932	2.29126	1.19614	up		Caffeic acid O-glucoside	1.15259	0.407514	-1.29508	down
N-Acetylthreonine	1.13776	2.00291	1.0021	up		Nicotinate ribonucleoside	1.12268	0.433242	-1.20676	down		Indole-3-carboxaldehyde	1.09828	4.13176	2.04676	up		Feruloyl syringic acid	1.15054	0.132632	-2.9145	down
H-HomoArg-OH	1.11591	2.1256	1.08787	up		Tricin 7-O-acetylglucoside	1.12956	0.381728	-1.38938	down		1-O-Caffeoyl quinic acid	1.1344	51.3709	5.68288	up		DGMG (18:2) isomer2	1.14357	0.300171	-1.73614	down
Esculetin (6,7-dihydroxycoumarin)	1.14422	11.6786	3.54579	up		Chrysin O-hexoside	1.15011	0.044325	-4.49574	down		4-Hydroxybenzoic acid	1.12493	3.22241	1.68814	up		MAG (18:3) isomer5	1.15133	0.251036	-1.99403	down
Sinapinaldehyde	1.16414	20.1564	4.33317	up		O-methylnaringenin C-pentoside	1.1297	0.353747	-1.49921	down		Naringenin chalcone	1.10293	4.10092	2.03595	up		N2-methylguanosine	1.14708	0.49199	-1.0233	down
Homoeriodictyol	1.16537	3955.56	11.9497	up		sn-Glycero-3-phosphocholine	1.14737	0.169143	-2.56369	down		Aromadedrin (Dihydrokaempferol)	1.11311	3.38425	1.75884	up		N-Feruloyl spermidine	1.16216	0.064838	-3.94702	down
Butin	1.09237	9.86705	3.30262	up		Methylglutaric acid	1.13209	0.413303	-1.27473	down		Quercetin 4'-O-glucoside (Spiraeoside)	1.1277	5.90541	2.56204	up		Hydroxy-methoxycinnamate	1.1581	0.117962	-3.0836	down
Daphnetin	1.08364	3.72635	1.89776	up		Caffeic acid O-glucoside	1.13297	0.370268	-1.43336	down		Delphinidin 3-O-rutinoside (Tulipanin)	1.1402	4781.48	12.2232	up		N-Feruloyl agmatine	1.16055	0.0644737	-3.95515	down
Guanosine 3',5'-cyclic monophosphate	1.07807	2.87398	1.52305	up		Feruloyl syringic acid	1.15004	0.0295252	-5.08191	down		Kaempferol 3-O-galactoside (Trifolin)	1.03674	5.52477	2.46591	up		N-Sinapoyl agmatine	1.16724	4.71204e-07	-21.0171	down
7-methylguanine	1.13878	4.98342	2.31714	up		DGMG (18:2) isomer2	1.10668	0.404545	-1.30563	down		Allysine(6-Oxo DL-Norleucine)	1.1386	13.6438	3.77018	up		N-(4'-O-glycosyl)-feruloyl agmatine	1.16628	0.0685838	-3.86599	down
Sinapoyl malate	1.16573	5.31496e-06	-17.5215	down		MAG (18:3) isomer5	1.0967	0.397575	-1.3307	down		Esculetin (6,7-dihydroxycoumarin)	1.13139	15.3725	3.94228	up		Adenosine 3'-monophosphate	1.14874	0.207484	-2.26893	down
Naringenin O-malonylhexoside	1.1537	0.102687	-3.28368	down		N-Feruloyl spermidine	1.15103	0.0165352	-5.91832	down		Sinapinaldehyde	1.10924	2.57274	1.3633	up		Nicotinic acid adenine dinucleotide	1.16162	0.37218	-1.42593	down
Chrysin O-malonylhexoside	1.16592	3.17647e-05	-14.9422	down		Aminopurine	1.07383	0.346058	-1.53091	down		Homoeriodictyol	1.1401	8174.07	12.9968	up		Inosine 5'-monophosphate	1.16008	0.162074	-2.62527	down
Nicotinic acid-hexoside	1.16246	0.109642	-3.18912	down		Hydroxy-methoxycinnamate	1.09206	0.335333	-1.57633	down		Daphnetin	1.10336	6.8147	2.76865	up		Rosinidin O-hexoside	1.16056	0.412463	-1.27766	down
Xanthurenic acid	1.16567	4.17957e-05	-14.5463	down		Aspartic acid di-O-glucoside	1.11553	0.40167	-1.31592	down		Guanosine 3',5'-cyclic monophosphate	1.13149	6.8958	2.78572	up		Apigenin O-hexosyl-O-pentoside	1.14503	0.102872	-3.28107	down
Nicotinate ribonucleoside	1.1498	0.283363	-1.81928	down		N-Sinapoyl putrescine	1.13108	0.0848544	-3.55887	down		7-methylguanine	1.05361	3.03212	1.60033	up		Apigenin O-malonylhexoside	1.16733	1.66873e-05	-15.8709	down
Chrysin O-hexoside	1.14006	0.0800156	-3.64357	down		N-Feruloyl agmatine	1.14615	0.022035	-5.50406	down		Hypoxanthine-9-β-D-arabinofuranoside	1.03953	2.06089	1.04327	up		Chrysin 5-O-glucoside (Toringin)	1.16769	6.87023e-06	-17.1512	down
O-methylnaringenin C-pentoside	1.16043	0.158221	-2.65998	down		N-Sinapoyl agmatine	1.15301	7.41758e-06	-17.0406	down		N-Caffeoyl agmatine	1.13179	0.0526135	-4.24842	down		Apigenin 7-O-glucoside (Cosmosiin)	1.12729	0.232845	-2.10256	down
sn-Glycero-3-phosphocholine	1.11431	0.218908	-2.1916	down		N-(4'-O-glycosyl)-feruloyl agmatine	1.14948	0.0289994	-5.10783	down		Sinapoyl malate	1.14014	1.1052e-06	-19.7873	down		C-hexosyl-apigenin O-pentoside	1.15837	0.245413	-2.02672	down
5-O-p-Coumaroylquinic acid	1.06133	0.412368	-1.278	down		Apigenin O-hexosyl-O-pentoside	1.1472	0.0649896	-3.94365	down		Naringenin O-malonylhexoside	1.02518	0.264081	-1.92095	down		C-hexosyl-apigenin C-pentoside	1.16268	0.198403	-2.33349	down
Feruloyl syringic acid	1.16512	0.0173589	-5.84818	down		Apigenin O-malonylhexoside	1.14755	2.08655e-05	-15.5485	down		Chrysin O-malonylhexoside	1.1401	3.71389e-05	-14.7167	down		LysoPC 16:2 (2n isomer)	1.04431	0.436907	-1.1946	down
PC 16:1/14:1	1.09413	0.366131	-1.44957	down		Chrysin 5-O-glucoside (Toringin)	1.15302	4.03587e-06	-17.9187	down		C-pentosyl-C-hexosyl-apigenin	1.13539	0.0906814	-3.46305	down		LysoPE 14:0	1.12455	0.488206	-1.03444	down
MAG (18:1) isomer2	1.13788	0.250314	-1.99819	down		Apigenin 7-O-glucoside (Cosmosiin)	1.04659	0.100584	-3.31353	down		Apigenin C-glucoside	1.05085	0.303727	-1.71915	down		LysoPC 18:3 (2n isomer)	1.10597	0.2952	-1.76024	down
N-Feruloyl spermidine	1.14415	0.100138	-3.31995	down		C-hexosyl-apigenin O-pentoside	1.13678	0.205048	-2.28597	down		Nicotinic acid-hexoside	1.13789	0.0389992	-4.68041	down		Adenosine 5'-monophosphate	1.15833	0.169415	-2.56136	down
Aminopurine	1.11192	0.251743	-1.98998	down		Eriodictyol O-malonylhexoside	1.1456	0.185523	-2.43033	down		N-sinapoyl cadaverine	1.14021	3.93013e-05	-14.6351	down		MAG (18:3) isomer3	1.15474	0.403188	-1.31047	down
"N',N"",N""'-p-coumaroyl-cinnamoyl-caffeoyl spermidine"	1.14863	0.247363	-2.0153	down		C-hexosyl-apigenin C-pentoside	1.14975	0.154455	-2.69474	down		5-Aminolevulinate	1.1264	0.451007	-1.14878	down		DGMG (18:1)	1.15741	0.293512	-1.76851	down
N-Feruloyl agmatine	1.12291	0.0878976	-3.50803	down		D-Pantothenic acid	1.01247	0.416083	-1.26506	down		Chrysin O-hexoside	1.14014	3.44388e-06	-18.1475	down		MAG (18:3) isomer2	1.16256	0.416462	-1.26374	down
N-(4'-O-glycosyl)-feruloyl agmatine	1.13789	0.0981568	-3.34877	down		LysoPC 12:1	1.15289	0.00106677	-9.87253	down		O-methylnaringenin C-pentoside	1.0992	0.389757	-1.35935	down		N-Acetylmethionine	1.15394	0.304404	-1.71594	down
Apigenin O-hexosyl-O-pentoside	1.15534	0.194162	-2.36467	down		4-oxo-9Z,11Z,13E,15E-octadecatetraenoic acid	1.12561	0.404057	-1.30737	down		sn-Glycero-3-phosphocholine	1.0782	0.330999	-1.5951	down		Gallocatechin-catechin	1.14831	0.0859233	-3.54081	down
Apigenin O-malonylhexoside	1.15841	0.00417372	-7.90445	down		iP7G	1.15249	0.184169	-2.44089	down		3-Hydroxypyridine	1.02487	0.344255	-1.53845	down		3,4-Dimethoxycinnamic acid	1.1262	0.235721	-2.08485	down
Chrysin 5-O-glucoside (Toringin)	1.16597	2.49769e-06	-18.611	down		L-Glutaminyl-L-valyl-L-valyl-L-cysteine	1.13441	0.231065	-2.11363	down		C-hexosyl-apigenin O-hexosyl-O-hexoside	1.12566	0.14501	-2.78577	down		D(+)-Melezitose O-rhamnoside	1.15054	0.0986262	-3.34189	down
Apigenin 7-O-glucoside (Cosmosiin)	1.16266	0.0179167	-5.80255	down		DGMG (18:1)	1.08828	0.426796	-1.22838	down		Caffeic acid O-glucoside	1.12129	0.333014	-1.58635	down		Argininosuccinate	1.1633	0.150653	-2.7307	down
C-rhamnosyl-apigenin O-feruloylhexoside	1.1659	0.000437601	-11.1581	down		MAG (18:3) isomer1	1.13516	0.427163	-1.22714	down		Feruloyl syringic acid	1.13074	0.045156	-4.46894	down		O-Caffeoyl maltotriose	1.07769	0.371875	-1.42711	down
Eriodictyol O-malonylhexoside	1.16529	0.000125348	-12.9618	down		2-Deoxyribose 1-phosphate	1.15284	3.23353e-05	-14.9165	down		DGMG (18:2) isomer2	1.08263	0.235666	-2.08519	down		L-Glutamine O-hexside	1.16759	0.0722456	-3.79095	down
5-O-p-Coumaroyl shikimic acid	1.16351	0.0221649	-5.49558	down		N-Acetylmethionine	1.14522	0.167656	-2.57643	down		MAG (18:3) isomer5	1.09503	0.182463	-2.45433	down		Uridine 5'-diphospho-D-glucose	1.15807	0.39724	-1.33192	down
D-Pantothenic acid	1.06503	0.276076	-1.85686	down		Gallocatechin-catechin	1.12898	0.19561	-2.35395	down		DGMG (18:2) isomer1	1.01694	0.344761	-1.53633	down		1-O-beta-D-Glucopyranosyl sinapate	1.15829	0.116473	-3.10193	down
LysoPC 18:2	1.15553	0.375764	-1.4121	down		Acetyl tryptophan	1.15189	0.196029	-2.35086	down		N2-methylguanosine	1.13074	0.34983	-1.51527	down		Cyanidin O-acetylhexoside	1.13433	0.2489	-2.00636	down
4-oxo-9Z,11Z,13E,15E-octadecatetraenoic acid	1.14564	0.129137	-2.95302	down		3,4-Dimethoxycinnamic acid	1.07649	0.311475	-1.68281	down		N-Feruloyl spermidine	1.13865	0.0564796	-4.14613	down		Acacetin O-acetyl hexoside	1.15914	0.171108	-2.54702	down
Punicic acid	1.02076	0.326763	-1.61368	down		D(+)-Melezitose O-rhamnoside	1.14759	0.170641	-2.55096	down		Hydroxy-methoxycinnamate	1.13686	0.184551	-2.43791	down		5-O-p-coumaroyl shikimic acid O-hexoside	1.10325	0.462098	-1.11373	down
MAG (18:2)	1.13171	0.2816	-1.82828	down		Argininosuccinate	1.13783	0.33534	-1.57631	down		N-Sinapoyl putrescine	1.09774	0.302759	-1.72376	down		3-O-p-coumaroyl shikimic acid O-hexoside	1.11526	0.292139	-1.77527	down
MAG (18:4) isomer3	1.09759	0.266417	-1.90824	down		Cyclic AMP	1.03351	0.388464	-1.36415	down		N-Feruloyl agmatine	1.13327	0.0685241	-3.86724	down		Guanosine 5'-monophosphate	1.12154	0.340801	-1.553	down
MAG (18:3) isomer4	1.12925	0.258307	-1.95284	down		9,10-EODE	1.02055	0.363823	-1.45869	down		N-Sinapoyl agmatine	1.14013	4.99076e-06	-17.6123	down		L-Homocitrulline	1.15531	0.282026	-1.8261	down
Cocamidopropyl betaine	1.09443	0.491987	-1.02331	down		13-HPODE	1.00993	0.29069	-1.78245	down		N-(4'-O-glycosyl)-feruloyl agmatine	1.13581	0.0531957	-4.23255	down		L-Citrulline	1.09476	0.428384	-1.22302	down
MAG (18:1) isomer1	1.14275	0.263812	-1.92242	down		L-Glutamine O-hexside	1.14655	0.0221225	-5.49834	down		Nicotinic acid adenine dinucleotide	1.11002	0.379962	-1.39607	down		L-Serine	1.15198	0.453245	-1.14164	down
MAG (18:3) isomer1	1.15779	0.0648491	-3.94677	down		L-Glutamic acid O-glucoside	1.14066	0.0514113	-4.28177	down		Rosinidin O-hexoside	1.09783	0.486903	-1.03829	down		L-Aspartic acid	1.15166	0.310165	-1.68889	down
2-Deoxyribose 1-phosphate	1.16459	6.17849e-05	-13.9824	down		Uridine 5'-diphospho-D-glucose	1.15147	0.294156	-1.76535	down		Apigenin O-hexosyl-O-pentoside	1.13594	0.0546019	-4.19491	down		γ-Glu-Cys	1.11054	0.224336	-2.15627	down
N-Acetylmethionine	1.14027	0.218664	-2.19321	down		1-O-beta-D-Glucopyranosyl sinapate	1.11268	0.0665364	-3.90971	down		Apigenin O-malonylhexoside	1.13957	1.60714e-05	-15.9251	down		N6-Acetyl-L-lysine	1.15536	0.283587	-1.81814	down
Acetyl tryptophan	1.16117	0.216278	-2.20904	down		Apigenin C-hexosyl-O-rutinoside	1.15281	0.000106341	-13.199	down		Chrysin 5-O-glucoside (Toringin)	1.14013	6.13636e-06	-17.3142	down		Glycyl-L-proline	1.15534	0.255165	-1.9705	down
Argininosuccinate	1.16156	0.345622	-1.53273	down		3-O-p-coumaroyl shikimic acid O-hexoside	1.09126	0.485679	-1.04193	down		Apigenin 7-O-glucoside (Cosmosiin)	1.07925	0.0595447	-4.06988	down		L-Homoserine	1.14295	0.322787	-1.63135	down
Cyclic AMP	1.13216	0.219668	-2.1866	down		3-O-p-Coumaroyl shikimic acid	1.15235	0.000312139	-11.6455	down		6-C-hexosyl chrysoeriol O-hexoside	1.09758	0.411765	-1.28011	down		β-Nicotinamide mononucleotide	1.13424	0.294862	-1.76189	down
9,10-EODE	1.12288	0.149128	-2.74538	down		Glucarate O-Phosphoric acid	1.12789	0.407056	-1.2967	down		C-hexosyl-apigenin O-pentoside	1.1376	0.126168	-2.98658	down		N-γ-Acetyl-N-2-Formyl-5-methoxykynurenamine	1.14563	0.237605	-2.07336	down
9-KODE	1.11096	0.314408	-1.66929	down		Syringic acid O-glucoside	1.14722	0.0534276	-4.22627	down		Eriodictyol O-malonylhexoside	1.09093	0.492958	-1.02046	down		1-Methylxanthine	1.14674	0.476782	-1.0686	down
4-Methoxycinnamic acid	1.10323	0.284956	-1.81119	down		Di-O-methylquercetin	1.15135	0.000130183	-12.9072	down		C-hexosyl-apigenin C-pentoside	1.13446	0.103545	-3.27167	down		Nα-Acetyl-L-arginine	1.0885	0.311392	-1.68319	down
12,13-EODE	1.11231	0.265639	-1.91246	down		4'-Hydroxy-5,7-dimethoxyflavanone	1.14982	0.31781	-1.65376	down		Piperidine	1.13799	0.482799	-1.0505	down		N-Glycyl-L-leucine	1.16276	0.341266	-1.55103	down
13-HPODE	1.11839	0.118088	-3.08206	down		Adenosine	1.08351	0.341701	-1.5492	down		Lysine butyrate	1.09008	0.290126	-1.78525	down		Azelaic Acid	1.13348	0.4805	-1.05739	down
O-Caffeoyl maltotriose	1.09197	0.433387	-1.20627	down		L-Homocitrulline	1.13054	0.371324	-1.42925	down		iP7G	1.06043	0.413295	-1.27475	down		5-Methyluridine	1.12283	0.442327	-1.17682	down
Citramalate	1.1286	0.339218	-1.55972	down		L-Proline	1.13144	0.457143	-1.12928	down		MAG (18:3) isomer3	1.10097	0.158375	-2.65858	down		2,6-Diaminooimelic acid	1.16166	0.0793697	-3.65527	down
L-Glutamic acid O-glucoside	1.12826	0.0618681	-4.01466	down		L-Citrulline	1.15085	0.197983	-2.33655	down		MGMG (18:2) isomer1	1.00945	0.340866	-1.55272	down		Isovitexin	1.16137	0.186314	-2.42419	down
Uridine 5'-diphospho-D-glucose	1.15776	0.425411	-1.23307	down		L-Serine	1.13735	0.402555	-1.31274	down		DGMG (18:1)	1.08553	0.22844	-2.13011	down		Homovanillic acid	1.01209	0.00293493	-8.41246	down
Hesperetin O-Glucuronic acid	1.16536	0.000743802	-10.3928	down		L-Aspartic acid	1.14953	0.342384	-1.54631	down		MAG (18:3) isomer2	1.0525	0.39838	-1.32778	down		L-Theanine	1.16327	0.220211	-2.18304	down
Apigenin C-hexosyl-O-rutinoside	1.11388	0.171891	-2.54043	down		L-(-)-Tyrosine	1.12097	0.397284	-1.33176	down		4-Hydroxy-3-methoxymandelate	1.12444	0.423563	-1.23935	down		Inositol	1.1641	0.440969	-1.18125	down
Tricin O-saccharic acid	1.12544	0.494409	-1.01622	down		Hypoxanthine	1.12915	0.462947	-1.11108	down		N-Acetylmethionine	1.13571	0.379915	-1.39625	down		Deoxyguanosine	1.14728	0.280936	-1.83169	down
3-O-p-coumaroyl shikimic acid O-hexoside	1.11864	0.309806	-1.69056	down		Cyanidin 3-O-glucoside (Kuromanin)	1.13096	0.432828	-1.20813	down		Gallocatechin-catechin	1.13566	0.121573	-3.04011	down		3-Methylxanthine	1.09562	0.445111	-1.16776	down
O-p-Coumaroyl quinic acid O-rutinoside derivative	1.16462	0.337662	-1.56635	down		β-Nicotinamide mononucleotide	1.09529	0.487927	-1.03526	down		D(+)-Melezitose O-rhamnoside	1.09738	0.34261	-1.54536	down		S-(5'-Adenosy)-L-homocysteine	1.15523	0.231987	-2.10789	down
3-O-p-Coumaroyl shikimic acid	1.16596	4.04798e-05	-14.5924	down		2-Hydroxy-6-aminopurine	1.10831	0.460653	-1.11825	down		Argininosuccinate	1.12482	0.482423	-1.05163	down		L-Pipecolic acid	1.12114	0.404281	-1.30657	down
Glucarate O-Phosphoric acid	1.15533	0.456179	-1.13233	down		Uracil	1.04672	0.38202	-1.38828	down		1-O-beta-D-Glucopyranosyl sinapate	1.13562	0.071851	-3.79885	down		L-Glutamine	1.16373	0.160275	-2.64138	down
Di-O-methylquercetin	1.16371	6.82508e-05	-13.8388	down		Ferulic acid	1.07269	0.466667	-1.09954	down		Acacetin O-acetyl hexoside	1.10937	0.380409	-1.39438	down		L-Methionine methyl ester	1.13666	0.413208	-1.27506	down
LysoPC 20:4	1.13748	0.373184	-1.42204	down		Apigenin 7-O-neohesperidoside (Rhoifolin)	1.1526	0.000141807	-12.7838	down		3-O-p-coumaroyl shikimic acid O-hexoside	1.1079	0.325239	-1.62043	down		Syringin	1.05071	0.0926002	-3.43284	down
Adenosine	1.13064	0.207678	-2.26758	down		Apigenin 5-O-glucoside	1.06477	0.355699	-1.49127	down		3-O-p-Coumaroyl shikimic acid	1.13886	0.00098289	-9.99068	down		Daidzein 7-O-glucoside (Daidzin)	1.167	0.00658133	-7.24741	down
LysoPC 20:1 (2n isomer)	1.07569	0.413831	-1.27289	down		Apigenin 7-rutinoside (Isorhoifolin)	1.15301	0.000136571	-12.8381	down		Glucarate O-Phosphoric acid	1.13851	0.246132	-2.0225	down		Apigenin 4-O-rhamnoside	1.1677	8.33333e-06	-16.8727	down
LysoPC 20:1	1.09555	0.421805	-1.24535	down		Isovitexin	1.13829	0.155754	-2.68266	down		Syringic acid O-glucoside	1.06597	0.104089	-3.2641	down		Isovitexin 7-O-glucoside (Saponarin)	1.16409	0.113311	-3.14164	down
L-Citrulline	1.1583	0.197407	-2.34075	down		Apigenin	1.15268	1.72634e-05	-15.8219	down		L-Homocitrulline	1.13913	0.104457	-3.25902	down		Nicotinic Acid Methyl Ester (Methyl Nicotinate)	1.1623	0.431812	-1.21153	down
L-Aspartic acid	1.11554	0.415488	-1.26712	down		Homovanillic acid	1.15017	0.0333161	-4.90764	down		L-Serine	1.13387	0.251706	-1.99019	down		1,5-Diaminopentane	1.09752	0.429119	-1.22055	down
2-Hydroxy-6-aminopurine	1.05512	0.436117	-1.19721	down		3-Hydroxy-4-methoxycinnamic acid	1.09096	0.472767	-1.0808	down		L-Leucine	1.12433	0.436364	-1.1964	down		D(+)-Glucose	1.16543	0.179503	-2.47792	down
N-Glycyl-L-leucine	1.12463	0.45809	-1.1263	down		Menaquinone (K2)	1.11059	0.478841	-1.06238	down		Thymine	1.03569	0.413333	-1.27462	down		DL-Arabinose	1.16048	0.374601	-1.41657	down
Uracil	1.14457	0.10176	-3.29676	down		Glutathione oxidized	1.13292	0.344678	-1.53668	down		L-Valine	1.12165	0.472091	-1.08286	down		(S)-(-)-2-Hydroxyisocaproic acid	1.03069	0.18432	-2.43972	down
5-Methyluridine	1.15372	0.393743	-1.34467	down		Uridine	1.08871	0.301508	-1.72973	down		N6-Acetyl-L-lysine	1.13782	0.123364	-3.019	down		Caffeic acid	1.15621	0.466207	-1.10096	down
Thymidine	1.14963	0.238545	-2.06766	down		Glutathione reduced form	1.06759	0.229783	-2.12165	down		Glycyl-L-proline	1.0584	0.471535	-1.08456	down		Quinone	1.16768	7.25806e-06	-17.072	down
Sebacate	1.16558	8.88743e-06	-16.7798	down		Guanosine	1.0652	0.312708	-1.67711	down		L-Homoserine	1.11201	0.494565	-1.01577	down		L(+)-Ornithine	1.16761	5.57851e-05	-14.1298	down
Isovitexin	1.16552	0.063151	-3.98505	down		Deoxyguanosine	1.12213	0.413915	-1.27259	down		N-γ-Acetyl-N-2-Formyl-5-methoxykynurenamine	1.13996	0.000200445	-12.2845	down		5-Hydroxyindole-3-acetic acid	1.16682	6.53753e-06	-17.2228	down
Apigenin	1.06416	0.150113	-2.73588	down		Deoxycytidine	1.14395	0.393015	-1.34734	down		1-Methylxanthine	1.10105	0.382984	-1.38464	down		Phe-Phe	1.0606	0.243225	-2.03964	down
Homovanillic acid	1.16319	0.0331957	-4.91286	down		S-(5'-Adenosy)-L-homocysteine	1.11188	0.128293	-2.96249	down		Sebacate	1.12047	0.237591	-2.07345	down		S-(5'-Adenosyl)-L-methionine	1.10313	0.478507	-1.06339	down
Methylmalonic acid	1.15951	0.330968	-1.59524	down		Homogentisic acid	1.14338	0.058714	-4.09015	down		6-Aminocaproic acid	1.13047	0.446413	-1.16355	down		N-Acetyl-5-hydroxytryptamine	1.16771	5.34653e-06	-17.513	down
Uridine	1.15315	0.0923323	-3.43702	down		Xanthosine	1.06889	0.287894	-1.79639	down		2,6-Diaminooimelic acid	1.13754	0.310624	-1.68676	down		7-Methylxanthine	1.14101	0.280151	-1.83572	down
Glutathione reduced form	1.13032	0.489635	-1.03022	down		Pyridoxine	1.1505	0.191657	-2.3834	down		Apigenin 5-O-glucoside	1.09409	0.229289	-2.12476	down		1,1-Dimethylbiguanide	1.16298	0.345437	-1.53351	down
Guanosine	1.14244	0.162704	-2.61968	down		L-Glutamine	1.14391	0.478999	-1.06191	down		Isovitexin	1.10888	0.14699	-2.76621	down		L-Homocystine	1.15967	0.463099	-1.11061	down
Deoxyguanosine	1.15888	0.138245	-2.8547	down		Syringin	1.15031	0.467045	-1.09837	down		Homovanillic acid	1.13851	0.0304069	-5.03946	down		Uridine 5’-diphosphate	1.15233	0.349938	-1.51483	down
Deoxycytidine	1.15867	0.12589	-2.98976	down		5'-Deoxy-5'-(methylthio)adenosine	1.14928	0.299385	-1.73993	down		L-Theanine	1.12733	0.428226	-1.22356	down		5-oxoproline	1.16539	0.390842	-1.35534	down
S-(5'-Adenosy)-L-homocysteine	1.16569	1.59574e-05	-15.9354	down		Tangeretin	1.13012	0.491317	-1.02528	down		Glutathione reduced form	1.12793	0.0172368	-5.85836	down		4-(Aminomethyl)-5-(hydroxymethyl)-2-methylpyridin-3-ol	1.16061	0.263687	-1.9231	down
Xanthosine	1.11998	0.166407	-2.58721	down		Daidzein 7-O-glucoside (Daidzin)	1.14824	0.0152751	-6.03267	down		Gallic acid	1.14009	2.59366e-05	-15.2347	down		D-Glucose 6-phosphate	1.16532	0.190581	-2.39152	down
1-Methyladenosine	1.12227	0.370039	-1.43425	down		Apigenin 4-O-rhamnoside	1.15299	6.35294e-06	-17.2641	down		Phloretin	1.04608	0.449008	-1.15519	down		D-Sedoheptuiose 7-phosphate	1.16235	0.429638	-1.21881	down
Pyridoxine	1.14367	0.318582	-1.65026	down		Coniferyl alcohol	1.14975	0.111289	-3.16762	down		S-(methyl)glutathione	1.13209	0.225773	-2.14705	down		Uridine 5'-monophosphate	1.16046	0.224061	-2.15804	down
p-Coumaric acid	1.12484	0.117241	-3.09245	down		Pinoresinol	1.14938	0.0852713	-3.5518	down		3-Methylxanthine	1.11951	0.383709	-1.38192	down		Coniferin	1.15245	0.4375	-1.19265	down
5'-Deoxy-5'-(methylthio)adenosine	1.15807	0.172961	-2.53148	down		Isovitexin 7-O-glucoside (Saponarin)	1.15121	0.100752	-3.31112	down		S-(5'-Adenosy)-L-homocysteine	1.12672	0.334769	-1.57876	down		6-Hydroxydaidzein	1.16733	0.000247253	-11.9817	down
Apigenin 4-O-rhamnoside	1.16574	2.75792e-06	-18.468	down		D-Pantothenic dcid	1.10318	0.212933	-2.23153	down		Homogentisic acid	1.10454	0.344783	-1.53624	down		2'-Hydroxydaidzein	1.1675	2.47934e-05	-15.2997	down
Isohemiphloin	1.15633	0.4161	-1.265	down		Sinapic acid	1.05032	0.409974	-1.28639	down		Syringin	1.1289	0.159595	-2.64751	down		D-Fructose 6-phosphate	1.1652	0.225054	-2.15166	down
sesamolin	1.11283	0.461842	-1.11453	down		Nicotinic Acid Methyl Ester (Methyl Nicotinate)	1.14637	0.206334	-2.27695	down		5'-Deoxy-5'-(methylthio)adenosine	1.08523	0.469428	-1.09102	down		5-hydroxyhexanoic acid	1.12404	0.442489	-1.17629	down
Isovitexin 7-O-glucoside (Saponarin)	1.15865	0.298429	-1.74454	down		1,5-Diaminopentane	1.153	1.39319e-06	-19.4532	down		Nobiletin	1.09918	0.462252	-1.11325	down		6-Methoxy-7,8-DihydroxyCoumarin	1.16398	0.0861857	-3.53641	down
D-Pantothenic dcid	1.1488	0.0772014	-3.69523	down		D(+)-Glucose	1.1493	0.151562	-2.72202	down		Tangeretin	1.1124	0.43341	-1.2062	down		D-Xylonic acid	1.1662	0.247446	-2.01481	down
D-(+)-Glucono-1,5-lactone	1.16415	0.000237885	-12.0374	down		Suberic acid	1.15049	0.129952	-2.94395	down		Daidzein 7-O-glucoside (Daidzin)	1.13912	0.0178383	-5.80888	down
Sinapic acid	1.07939	0.436053	-1.19742	down		DL-Arabinose	1.13957	0.465466	-1.10325	down		Apigenin 4-O-rhamnoside	1.14008	8.68446e-06	-16.8131	down
Nicotinic Acid Methyl Ester (Methyl Nicotinate)	1.15955	0.127206	-2.97476	down		L(-)-Malic acid	1.14793	0.327132	-1.61206	down		Coniferyl alcohol	1.1055	0.349057	-1.51847	down
Succinic acid	1.16093	0.341197	-1.55132	down		(S)-(-)-2-Hydroxyisocaproic acid	1.14215	0.389968	-1.35857	down		Pinoresinol	1.13329	0.0928571	-3.42884	down
1,5-Diaminopentane	1.16596	2.71084e-07	-21.8148	down		DL-threitol	1.13982	0.298328	-1.74503	down		Isovitexin 7-O-glucoside (Saponarin)	1.13326	0.0674759	-3.88948	down
D(+)-Glucose	1.16027	0.208565	-2.26143	down		Caffeic acid	1.13828	0.376855	-1.40792	down		D-(+)-Glucono-1,5-lactone	1.07922	0.335166	-1.57705	down
Suberic acid	1.16557	0.0831522	-3.5881	down		Biotin	1.14956	0.321605	-1.63664	down		1,5-Diaminopentane	1.13034	0.294106	-1.76559	down
L(-)-Malic acid	1.16119	0.265902	-1.91103	down		Quinone	1.15303	1.25174e-05	-16.2857	down		D(+)-Glucose	1.1381	0.0908876	-3.45977	down
DL-threitol	1.11115	0.359293	-1.47677	down		N-Acetylaspartate	1.13408	0.367807	-1.44298	down		DL-Arabinose	1.13617	0.31917	-1.6476	down
Biotin	1.1535	0.206745	-2.27408	down		3,4-Dihydroxybenzeneacetic acid	1.14307	0.0594015	-4.07336	down		L(-)-Malic acid	1.13533	0.370123	-1.43392	down
A-Ketoglutaric acid	1.15848	0.338571	-1.56247	down		5-Hydroxyindole-3-acetic acid	1.15265	0.000101964	-13.2597	down		(S)-(-)-2-Hydroxyisocaproic acid	1.13581	0.186652	-2.42158	down
N-Acetylaspartate	1.06628	0.480984	-1.05594	down		Pyrrole-2-carboxylic acid	1.11451	0.422939	-1.24148	down		Caffeic acid	1.11446	0.352857	-1.50284	down
Pyrrole-2-carboxylic acid	1.03694	0.178308	-2.48756	down		S-(5'-Adenosyl)-L-methionine	1.14698	0.248501	-2.00868	down		3,4-Dihydroxybenzeneacetic acid	1.11473	0.318035	-1.65274	down
S-(5'-Adenosyl)-L-methionine	1.05149	0.401218	-1.31754	down		7-Methylxanthine	1.14681	0.121272	-3.04368	down		5-Hydroxyindole-3-acetic acid	1.14021	2.64188e-05	-15.2081	down
N-Acetyl-5-hydroxytryptamine	1.10779	0.371606	-1.42815	down		Palmitaldehyde	1.1517	0.349095	-1.51831	down		Dl-Norvaline	1.12174	0.461952	-1.11419	down
7-Methylxanthine	1.16165	0.0711166	-3.81367	down		5-oxoproline	1.1402	0.484603	-1.04512	down		NADP	1.11423	0.271567	-1.88062	down
4-(Aminomethyl)-5-(hydroxymethyl)-2-methylpyridin-3-ol	1.16092	0.312261	-1.67918	down		4-(Aminomethyl)-5-(hydroxymethyl)-2-methylpyridin-3-ol	1.15021	0.366492	-1.44815	down		S-(5'-Adenosyl)-L-methionine	1.12512	0.488372	-1.03395	down
2-(Formylamino)benzoic acid	1.1244	0.154217	-2.69697	down		Ureidoisobutyric acid	1.15209	5.81897e-05	-14.0689	down		N-Acetyl-5-hydroxytryptamine	1.11872	0.491358	-1.02515	down
Aminomalonic acid	1.15702	0.345133	-1.53478	down		D-Glucose 6-phosphate	1.15027	0.283651	-1.81781	down		7-Methylxanthine	1.13895	0.136204	-2.87616	down
Ureidoisobutyric acid	1.16442	9.6532e-05	-13.3386	down		D-Sedoheptuiose 7-phosphate	1.14788	0.364804	-1.4548	down		Ureidoisobutyric acid	1.14008	4.08472e-05	-14.5794	down
D-Glucose 6-phosphate	1.12527	0.388637	-1.3635	down		trans,trans-Muconic acid	1.02269	0.4639	-1.10811	down		D-Glucose 6-phosphate	1.12798	0.437808	-1.19163	down
D-Sedoheptuiose 7-phosphate	1.16043	0.447917	-1.1587	down		Genistein 7-O-Glucoside (Genistin)	1.14958	0.0935218	-3.41855	down		D-Sedoheptuiose 7-phosphate	1.13575	0.212262	-2.23608	down
Genistein 7-O-Glucoside (Genistin)	1.14827	0.177186	-2.49666	down		Coniferin	1.13893	0.373293	-1.42162	down		CYS-GLY	1.13974	4.38312e-05	-14.4777	down
6-Hydroxydaidzein	1.16577	1.37405e-05	-16.1512	down		6-Hydroxydaidzein	1.14772	0.000174644	-12.4833	down		Uridine 5'-monophosphate	1.13171	0.486223	-1.04031	down
2'-Hydroxydaidzein	1.16584	1.42255e-06	-19.4231	down		2'-Hydroxydaidzein	1.14998	1.81941e-05	-15.7462	down		Genistein 7-O-Glucoside (Genistin)	1.14018	7.5e-05	-13.7027	down
Kaempferol 3-O-rhamnoside (Kaempferin)	1.15615	0.195413	-2.3554	down		Kaempferol 3-O-rhamnoside (Kaempferin)	1.13501	0.154667	-2.69277	down		Vitexin 2''-O-beta-L-rhamnoside	1.14004	0.000123007	-12.989	down
D-Fructose 6-phosphate	1.15057	0.383611	-1.38228	down		p-Coumaryl alcohol	1.14885	0.2271	-2.1386	down		Coniferin	1.11429	0.346276	-1.53001	down
1,4-dihydro-1-Methyl-4-oxo-3-pyridinecarboxamide	1.10265	0.230334	-2.1182	down		D-Fructose 6-phosphate	1.15168	0.272131	-1.87763	down		6-Hydroxydaidzein	1.13962	0.000173969	-12.4889	down
Myricetin 3-O-galactoside	1.01463	0.302029	-1.72724	down		1,4-dihydro-1-Methyl-4-oxo-3-pyridinecarboxamide	1.08265	0.352658	-1.50366	down		2'-Hydroxydaidzein	1.13976	1.88153e-05	-15.6977	down
Anthranilic acid	1.11094	0.432056	-1.21071	down		Pantetheine	1.11197	0.456039	-1.13277	down		Kaempferol 3-O-rhamnoside (Kaempferin)	1.13745	0.0932878	-3.42217	down
D-glucoronic acid	1.09758	0.411715	-1.28028	down		D-glucoronic acid	1.13201	0.432977	-1.20764	down		D-Fructose 6-phosphate	1.13788	0.41215	-1.27876	down
Cytidine	1.14388	0.245312	-2.02731	down		Cytidine	1.06582	0.341551	-1.54983	down		6-Methoxy-7,8-DihydroxyCoumarin	1.12607	0.23024	-2.11879	down
Deoxyadenosine	1.15378	0.138968	-2.84718	down		Deoxyadenosine	1.14381	0.36093	-1.47021	down
2-(dimethylamino)guanosine	1.11711	0.391938	-1.3513	down		β-Pseudouridine	1.08446	0.294721	-1.76258	down
β-Pseudouridine	1.15341	0.085	-3.55639	down
NOTE: differentially accumulating compounds were identified using thresholds of VIP (variable importance in projection) ＞=1.0 and fold change ＞= 2(up-regulated) or ＜=0.5 (down-regulated)in Chiltepin compared to BB3 .LogFC is Log2 ratio of the fold change.
