# Supplementary material for: Integrative Analysis of the Metabolome and Transcriptome of a Cultivated Pepper and Its Wild Progenitor Chiltepin (Capsicum annuum L. var. glabriusculum) Revealed the Loss of Pungency During Capsicum Domestication
Source: Front Plant Sci. 2022 Jan 5;12:783496. doi: 10.3389/fpls.2021.783496 (PMC8767146; doi:10.3389/fpls.2021.783496)
Supplement: Supplementary file 4 [file Table_4.XLSX]

## Sheet: Sheet1
Supplementary Table S4. Statistical analyses and mapping results of RNA sequencing reads
Sample	clean reads	cleans bases	Error Rate	Q20	Q30	GC content
BB3-11DAP-1	62372500	9355875000	0.345	97.165	92.63	42.88
BB3-11DAP-2	41985860	6297879000	0.325	97.43	93.175	43.095
BB3-11DAP-3	52243842	7836576300	0.315	97.61	93.44	42.66
BB3-22DAP-1	52023170	7803475500	0.31	97.585	93.47	42.955
BB3-22DAP-2	53544744	8031711600	0.345	97.24	92.73	42.85
BB3-22DAP-3	54337586	8150637900	0.315	97.51	93.275	42.82
BB3-33DAP-1	52496418	7874462700	0.34	97.265	92.765	43.245
BB3-33DAP-2	51341962	7701294300	0.33	97.39	93.045	43.115
BB3-33DAP-3	50650178	7597526700	0.33	97.425	93.1	43.14
BB3-55DAP-1	53663836	8049575400	0.32	97.52	93.345	42.395
BB3-55DAP-2	39386316	5907947400	0.305	97.675	93.78	42.68
BB3-55DAP-3	51370070	7705510500	0.305	97.68	93.69	42.595
Chiltepin-11DAP-2	51389360	7708404000	0.315	97.555	93.55	42.81
Chiltepin-11DAP-3	53607210	8041081500	0.31	97.58	93.44	42.875
Chiltepin-22DAP-1	52955714	7943357100	0.295	97.75	93.905	42.66
Chiltepin-22DAP-2	48759260	7313889000	0.31	97.65	93.645	42.655
Chiltepin-22DAP-3	50085632	7512844800	0.305	97.67	93.685	42.725
Chiltepin-33DAP-2	53399906	8009985900	0.34	97.235	92.86	43.16
Chiltepin-33DAP-3	51318052	7697707800	0.32	97.455	93.28	43.145
Chiltepin-55DAP-1	49758092	7463713800	0.32	97.51	93.45	42.67
Chiltepin-55DAP-2	50751588	7612738200	0.3	97.755	93.845	42.585
Chiltepin-55DAP-3	53457174	8018576100	0.31	97.6	93.55	42.67
