# Supplementary material for: Integrative Analysis of the Metabolome and Transcriptome of a Cultivated Pepper and Its Wild Progenitor Chiltepin (Capsicum annuum L. var. glabriusculum) Revealed the Loss of Pungency During Capsicum Domestication
Source: Front Plant Sci. 2022 Jan 5;12:783496. doi: 10.3389/fpls.2021.783496 (PMC8767146; doi:10.3389/fpls.2021.783496)
Supplement: Supplementary file 5 [file Table_5.XLSX]

## Sheet: 11DAP
Supplementary Table S6. The differentially expressed genes (DEGs) identified between the BB3 and Chiltepin
Gene ID	BB3-11DAP	Chiltepin-11DAP	log2FoldChange	pvalue	regulated	GO
Capana02g002069	61.3679	14388.2	7.87789	0	up	--
Capana02g003105	174.903	7791.06	5.47325	0	up	GO:0009507,chloroplast; GO:0016020,membrane; GO:0071949,FAD binding; GO:0009540,zeaxanthin epoxidase [overall] activity; GO:0009688,abscisic acid biosynthetic process
Capana03g001241	1976.71	36894.1	4.22252	0	up	GO:0005737,cytoplasm
Capana04g000110	3026.5	24742.4	3.03154	0	up	GO:0031969,chloroplast membrane; GO:0016021,integral component of membrane; GO:0005524,ATP binding; GO:0046872,metal ion binding; GO:0004222,metalloendopeptidase activity; GO:0007049,cell cycle; GO:0051301,cell division
Capana06g000376	326.874	9845.18	4.91216	0	up	--
Capana06g000386	1248.69	43729.1	5.1304	0	up	GO:0005737,cytoplasm
Capana06g002498	150.971	34373	7.83255	0	up	GO:0005737,cytoplasm; GO:0005524,ATP binding; GO:0051082,unfolded protein binding; GO:0006457,protein folding; GO:0006950,response to stress
Capana08g001718	385.262	8210.69	4.4156	0	up	GO:0016021,integral component of membrane; GO:0005886,plasma membrane; GO:0000293,ferric-chelate reductase activity; GO:0046872,metal ion binding; GO:0006811,ion transport; GO:0009416,response to light stimulus
Capana11g000402	304.348	22695.8	6.21984	0	up	GO:0005886,plasma membrane; GO:0005524,ATP binding; GO:0031072,heat shock protein binding; GO:0046872,metal ion binding; GO:0051082,unfolded protein binding; GO:0006457,protein folding; GO:0009408,response to heat
Capana01g003067	37.1108	5055.65	7.10142	4.49404e-298	up	GO:0009507,chloroplast; GO:0005524,ATP binding; GO:0016301,kinase activity; GO:0046872,metal ion binding; GO:0050242,pyruvate, phosphate dikinase activity; GO:0015979,photosynthesis; GO:0006090,pyruvate metabolic process
Capana01g002623	331.555	19104.2	5.85192	5.48998e-286	up	GO:0046872,metal ion binding; GO:0016702,oxidoreductase activity, acting on single donors with incorporation of molecular oxygen, incorporation of two atoms of oxygen
Capana09g001864	2234.57	14976.3	2.74388	2.91375e-280	up	GO:0005737,cytoplasm; GO:0004364,glutathione transferase activity; GO:0006749,glutathione metabolic process; GO:0010731,protein glutathionylation
Capana11g002133	4483.55	45415	3.34089	1.23163e-271	up	GO:0009507,chloroplast; GO:0009941,chloroplast envelope; GO:0009570,chloroplast stroma; GO:0005739,mitochondrion; GO:0009536,plastid; GO:0005774,vacuolar membrane; GO:0005524,ATP binding; GO:0042803,protein homodimerization activity; GO:0051082,unfolded protein binding; GO:0009704,de-etiolation; GO:0006457,protein folding; GO:0045037,protein import into chloroplast stroma; GO:0010157,response to …
Capana03g003444	573.796	6377.56	3.47182	2.87327e-270	up	--
Capana01g001127	467.413	11966.3	4.67768	2.50595e-240	up	--
Capana03g002812	224.127	6638.77	4.89186	6.86494e-223	up	GO:0009506,plasmodesma; GO:0052692,raffinose alpha-galactosidase activity; GO:0016757,transferase activity, transferring glycosyl groups; GO:0034484,raffinose catabolic process; GO:0080167,response to karrikin; GO:0006979,response to oxidative stress
Capana05g002266	401.716	12064.4	4.91142	2.1187e-222	up	GO:0016021,integral component of membrane; GO:0005524,ATP binding; GO:0016887,ATPase activity
Capana07g001803	2854.1	34553.1	3.59808	6.24215e-209	up	GO:0009941,chloroplast envelope; GO:0009535,chloroplast thylakoid membrane; GO:0016021,integral component of membrane; GO:0005524,ATP binding; GO:0004176,ATP-dependent peptidase activity; GO:0046872,metal ion binding; GO:0004222,metalloendopeptidase activity; GO:0008237,metallopeptidase activity; GO:0010205,photoinhibition; GO:0010206,photosystem II repair; GO:0006508,proteolysis; GO:0010304,PSII…
Capana06g000767	66.0256	7133.01	6.76348	1.87853e-208	up	--
Capana05g000212	836.562	11126	3.7318	8.44032e-204	up	GO:0005782,peroxisomal matrix; GO:0006457,protein folding; GO:0009408,response to heat; GO:0000302,response to reactive oxygen species
Capana06g002940	1009.22	26404.1	4.71005	2.1527e-201	up	--
Capana08g002266	156.234	4298.5	4.7831	1.96424e-197	up	GO:0005737,cytoplasm; GO:0010286,heat acclimation; GO:0009408,response to heat; GO:0009644,response to high light intensity; GO:0042542,response to hydrogen peroxide
Capana02g003315	1747.47	28441.1	4.02524	6.18244e-195	up	GO:0009507,chloroplast; GO:0009570,chloroplast stroma; GO:0009532,plastid stroma; GO:0005524,ATP binding; GO:0009658,chloroplast organization; GO:0016485,protein processing; GO:0009408,response to heat
Capana03g000076	961.983	11624.5	3.59427	1.69995e-190	up	--
Capana01g001119	771.62	6131.11	2.99202	3.08703e-190	up	GO:0009507,chloroplast; GO:0010287,plastoglobule; GO:0009579,thylakoid; GO:0003954,NADH dehydrogenase activity; GO:0006979,response to oxidative stress; GO:1901006,ubiquinone-6 biosynthetic process
Capana09g000048	248.409	3897.6	3.97229	5.67522e-188	up	GO:0016021,integral component of membrane; GO:0005774,vacuolar membrane; GO:0009678,hydrogen-translocating pyrophosphatase activity; GO:0004427,inorganic diphosphatase activity; GO:0046872,metal ion binding; GO:0015992,NA
Capana01g002769	305.95	3306.93	3.43203	1.11396e-187	up	GO:0005634,nucleus; GO:0006355,regulation of transcription, DNA-templated; GO:0048511,rhythmic process; GO:0006351,transcription, DNA-templated
Capana02g002477	14.1955	28442.5	10.9564	4.88392e-186	up	GO:0005615,extracellular space; GO:0004568,chitinase activity; GO:0016998,cell wall macromolecule catabolic process; GO:0006032,chitin catabolic process; GO:0006952,defense response; GO:0000272,polysaccharide catabolic process
Capana09g001148	914.89	5987.36	2.71129	1.64695e-184	up	GO:0005788,endoplasmic reticulum lumen; GO:0009506,plasmodesma; GO:0005773,vacuole; GO:0016491,oxidoreductase activity; GO:0034605,cellular response to heat; GO:0009860,pollen tube growth; GO:0009408,response to heat
Capana06g002591	154.801	2004.48	3.6925	1.476e-176	up	GO:0005737,cytoplasm; GO:0005643,nuclear pore; GO:0005634,nucleus; GO:0008536,Ran GTPase binding; GO:0000082,G1/S transition of mitotic cell cycle; GO:0046907,intracellular transport; GO:0051028,mRNA transport; GO:0043547,positive regulation of GTPase activity; GO:0006606,protein import into nucleus; GO:0006405,RNA export from nucleus; GO:0007051,spindle organization; GO:0006511,ubiquitin-depende…
Capana04g001226	448.946	5390.57	3.58231	4.28392e-175	up	GO:0005829,cytosol; GO:0005634,nucleus; GO:0005886,plasma membrane; GO:0009506,plasmodesma; GO:0080037,negative regulation of cytokinin-activated signaling pathway; GO:0010628,positive regulation of gene expression; GO:2000012,regulation of auxin polar transport; GO:0010449,root meristem growth
Capana12g001095	3808.21	17962.9	2.23759	4.44369e-173	up	GO:0005737,cytoplasm; GO:0005654,nucleoplasm; GO:0005634,nucleus; GO:0030154,cell differentiation; GO:0007623,circadian rhythm; GO:0009908,flower development; GO:0048578,positive regulation of long-day photoperiodism, flowering; GO:0009585,red, far-red light phototransduction; GO:0042752,regulation of circadian rhythm; GO:0006355,regulation of transcription, DNA-templated; GO:0009637,response to …
Capana07g001810	239.496	2821.37	3.55648	9.18562e-172	up	GO:0009507,chloroplast
Capana06g000919	516.669	11322.4	4.45615	1.68678e-171	up	GO:0005737,cytoplasm; GO:0005634,nucleus; GO:0019005,SCF ubiquitin ligase complex; GO:0005516,calmodulin binding; GO:0004402,histone acetyltransferase activity; GO:0003712,transcription cofactor activity; GO:0031625,ubiquitin protein ligase binding; GO:0008270,zinc ion binding; GO:0009738,abscisic acid-activated signaling pathway; GO:0009734,auxin-activated signaling pathway; GO:0007623,circadian…
Capana08g002624	1712.92	30829.7	4.1706	8.64569e-168	up	GO:0048046,apoplast; GO:0009507,chloroplast; GO:0009941,chloroplast envelope; GO:0009570,chloroplast stroma; GO:0016020,membrane; GO:0010287,plastoglobule; GO:0009579,thylakoid; GO:0004332,fructose-bisphosphate aldolase activity; GO:0006094,gluconeogenesis; GO:0006096,glycolytic process; GO:0009737,response to abscisic acid; GO:0046686,response to cadmium ion
Capana08g002587	324.412	3045.57	3.2268	8.3281e-161	up	GO:0005783,endoplasmic reticulum; GO:0005789,endoplasmic reticulum membrane; GO:0016671,oxidoreductase activity, acting on a sulfur group of donors, disulfide as acceptor; GO:0003756,protein disulfide isomerase activity; GO:0015035,protein disulfide oxidoreductase activity; GO:0006464,cellular protein modification process; GO:0034975,protein folding in endoplasmic reticulum; GO:0051604,protein ma…
Capana04g000493	123.841	4004.95	5.02378	1.81699e-159	up	GO:0048046,apoplast; GO:0043531,ADP binding; GO:0005524,ATP binding; GO:0042742,defense response to bacterium
Capana10g001907	21.5949	1514.28	6.11468	4.79774e-158	up	GO:0000139,Golgi membrane; GO:0016021,integral component of membrane; GO:0016757,transferase activity, transferring glycosyl groups; GO:0071555,cell wall organization; GO:0006486,protein glycosylation
Capana03g000267	2647.43	18626.7	2.81516	2.64326e-156	up	GO:0009507,chloroplast; GO:0005524,ATP binding; GO:0042026,protein refolding
Capana02g002997	586.959	5494.15	3.2239	1.59623e-153	up	GO:0009507,chloroplast; GO:0016021,integral component of membrane; GO:1990641,response to iron ion starvation
Capana12g001239	6590.72	32381.7	2.29694	4.21349e-153	up	GO:0009507,chloroplast; GO:0004471,malate dehydrogenase (decarboxylating) (NAD+) activity; GO:0004473,malate dehydrogenase (decarboxylating) (NADP+) activity; GO:0046872,metal ion binding; GO:0051287,NAD binding; GO:0008948,oxaloacetate decarboxylase activity
Capana11g000234	1434.89	8009.24	2.48144	4.73419e-148	up	--
Capana03g001270	40.9642	1594.6	5.29714	5.34361e-147	up	GO:0016021,integral component of membrane; GO:0020037,heme binding; GO:0005506,iron ion binding; GO:0004497,monooxygenase activity; GO:0016705,oxidoreductase activity, acting on paired donors, with incorporation or reduction of molecular oxygen
Capana02g002823	79.0449	1553.13	4.28768	2.24132e-146	up	GO:0005829,cytosol; GO:0009904,chloroplast accumulation movement; GO:0009903,chloroplast avoidance movement; GO:0009637,response to blue light
Capana09g000324	233.308	2757.77	3.55971	9.12417e-146	up	GO:0009507,chloroplast; GO:0009570,chloroplast stroma; GO:0005524,ATP binding; GO:0051536,iron-sulfur cluster binding; GO:0046872,metal ion binding; GO:0016226,iron-sulfur cluster assembly
Capana01g002674	250.588	2707.07	3.43204	5.67033e-144	up	--
Capana00g002636	1077.95	7970.51	2.88588	7.88324e-143	up	--
Capana07g000220	76.9382	8349.53	6.77082	2.64207e-142	up	GO:0005737,cytoplasm; GO:0008886,glyceraldehyde-3-phosphate dehydrogenase (NADP+) (non-phosphorylating) activity
Capana09g001679	4.79606	5751.3	10.2253	5.04733e-142	up	GO:0000785,chromatin; GO:0005829,cytosol; GO:0005634,nucleus; GO:0003682,chromatin binding; GO:0005085,guanyl-nucleotide exchange factor activity; GO:0042802,identical protein binding; GO:0009881,photoreceptor activity; GO:0042803,protein homodimerization activity; GO:0009649,entrainment of circadian clock; GO:0018298,protein-chromophore linkage; GO:0009411,response to UV; GO:0010224,response to …
Capana03g001611	9.06557	2587.78	8.24898	6.66245e-142	up	GO:0016021,integral component of membrane; GO:0005887,integral component of plasma membrane; GO:0008515,sucrose transmembrane transporter activity; GO:0051119,sugar transmembrane transporter activity; GO:0015770,sucrose transport
Capana05g000107	76.3262	3963.48	5.69762	8.10876e-142	up	GO:0005886,plasma membrane; GO:0009738,abscisic acid-activated signaling pathway; GO:1900458,negative regulation of brassinosteroid mediated signaling pathway
Capana06g000735	758.926	7598.54	3.32476	2.07545e-141	up	GO:0005634,nucleus; GO:0003677,DNA binding; GO:0003700,DNA binding transcription factor activity; GO:0003712,transcription cofactor activity; GO:0008270,zinc ion binding; GO:0048573,photoperiodism, flowering; GO:0006355,regulation of transcription, DNA-templated; GO:0080167,response to karrikin; GO:0009416,response to light stimulus; GO:0006351,transcription, DNA-templated; GO:0010228,vegetative …
Capana07g000030	17.0385	1686.3	6.60456	4.73175e-141	up	GO:0005634,nucleus; GO:0003700,DNA binding transcription factor activity; GO:0008270,zinc ion binding; GO:0048571,long-day photoperiodism; GO:0048579,negative regulation of long-day photoperiodism, flowering; GO:0045892,negative regulation of transcription, DNA-templated; GO:0048576,positive regulation of short-day photoperiodism, flowering; GO:0009909,regulation of flower development; GO:0006355…
Capana06g000781	245.513	3588.43	3.86486	4.86616e-138	up	GO:0009507,chloroplast; GO:0003677,DNA binding; GO:0003700,DNA binding transcription factor activity; GO:0001053,plastid sigma factor activity; GO:0016987,bacterial sigma factor activity; GO:0071482,cellular response to light stimulus; GO:0071461,cellular response to redox state; GO:0006352,DNA-templated transcription, initiation; GO:0080005,photosystem stoichiometry adjustment; GO:2001141,regula…
Capana10g001869	386.837	3349.13	3.11748	2.30134e-137	up	GO:0005829,cytosol; GO:0016020,membrane; GO:0005086,ARF guanyl-nucleotide exchange factor activity; GO:0043001,Golgi to plasma membrane protein transport; GO:0032012,regulation of ARF protein signal transduction
Capana03g001926	25.1642	1498.22	5.91491	7.31087e-135	up	GO:0005634,nucleus; GO:0003700,DNA binding transcription factor activity; GO:0043565,sequence-specific DNA binding; GO:0006351,transcription, DNA-templated
Capana01g000505	1858.4	13219	2.83148	3.63479e-129	up	GO:0048046,apoplast; GO:0009507,chloroplast; GO:0009941,chloroplast envelope; GO:0009570,chloroplast stroma; GO:0005739,mitochondrion; GO:0005524,ATP binding; GO:0005525,GTP binding; GO:0003924,GTPase activity; GO:0003746,translation elongation factor activity; GO:0009658,chloroplast organization; GO:0009791,post-embryonic development; GO:0009845,seed germination
Capana00g002001	819.369	4824.86	2.55824	1.1031e-128	up	--
Capana09g002344	799.105	4012.86	2.32667	2.12115e-128	up	GO:0005634,nucleus; GO:0003677,DNA binding; GO:0003700,DNA binding transcription factor activity; GO:0043565,sequence-specific DNA binding; GO:0006355,regulation of transcription, DNA-templated; GO:0010200,response to chitin; GO:0009408,response to heat; GO:0006351,transcription, DNA-templated
Capana01g003905	213.259	2182.75	3.35659	2.36093e-128	up	GO:0016021,integral component of membrane; GO:0009705,plant-type vacuole membrane; GO:0005886,plasma membrane; GO:0015112,nitrate transmembrane transporter activity; GO:0071249,cellular response to nitrate; GO:0042128,nitrate assimilation; GO:0015706,nitrate transport
Capana12g000116	395.137	12493.4	4.98552	7.44918e-127	up	GO:0048046,apoplast; GO:0009507,chloroplast; GO:0009570,chloroplast stroma; GO:0016020,membrane; GO:0005777,peroxisome; GO:0005886,plasma membrane; GO:0008453,alanine-glyoxylate transaminase activity; GO:0050281,serine-glyoxylate transaminase activity; GO:0004760,serine-pyruvate transaminase activity; GO:0019265,glycine biosynthetic process, by transamination of glyoxylate; GO:0009853,photorespir…
Capana04g002894	3651.21	32102.5	3.13621	9.47185e-127	up	GO:0005739,mitochondrion; GO:0004017,adenylate kinase activity; GO:0005524,ATP binding
Capana07g002465	15.3148	1326.81	6.43504	1.65457e-126	up	GO:0016021,integral component of membrane; GO:0005886,plasma membrane; GO:0005524,ATP binding; GO:0004674,protein serine/threonine kinase activity
Capana06g000280	122.74	2539.25	4.37897	2.40252e-126	up	GO:0005737,cytoplasm; GO:0005829,cytosol; GO:0005634,nucleus; GO:0005524,ATP binding; GO:0004672,protein kinase activity; GO:0004674,protein serine/threonine kinase activity; GO:0035556,intracellular signal transduction; GO:0046777,protein autophosphorylation; GO:0006468,protein phosphorylation
Capana08g000873	39.4075	1143.35	4.84575	6.44542e-126	up	GO:0005737,cytoplasm; GO:0047501,(+)-neomenthol dehydrogenase activity; GO:0006952,defense response
Capana03g000145	1331.88	7068.65	2.40825	3.25913e-124	up	GO:0005737,cytoplasm; GO:0005634,nucleus; GO:0046872,metal ion binding; GO:0004722,protein serine/threonine phosphatase activity; GO:0009738,abscisic acid-activated signaling pathway
Capana08g000497	816.797	5954.03	2.86535	3.82575e-123	up	GO:0005634,nucleus; GO:0003700,DNA binding transcription factor activity; GO:0043565,sequence-specific DNA binding; GO:0006351,transcription, DNA-templated
Capana04g001537	85.4476	3178.83	5.2049	3.92215e-123	up	GO:0005634,nucleus; GO:0003677,DNA binding; GO:0003700,DNA binding transcription factor activity; GO:0009788,negative regulation of abscisic acid-activated signaling pathway; GO:0009611,response to wounding; GO:0006351,transcription, DNA-templated
Capana05g002399	584.085	3949.39	2.75678	4.32973e-122	up	GO:0016021,integral component of membrane; GO:0005774,vacuolar membrane; GO:0008324,cation transmembrane transporter activity
Capana12g000556	2087.48	8902.36	2.09284	2.14269e-121	up	--
Capana10g001339	595.051	3862.18	2.69709	8.9271e-121	up	GO:0005794,Golgi apparatus; GO:0016021,integral component of membrane; GO:0005886,plasma membrane; GO:0009506,plasmodesma; GO:0005524,ATP binding; GO:0004675,transmembrane receptor protein serine/threonine kinase activity; GO:0007166,cell surface receptor signaling pathway; GO:0006468,protein phosphorylation
Capana00g004514	240.262	2945.47	3.6103	7.68086e-120	up	--
Capana04g002847	505.375	2694.73	2.41268	5.06238e-119	up	--
Capana02g002621	2586.87	42814.2	4.04941	5.24329e-119	up	GO:0048046,apoplast; GO:0009507,chloroplast; GO:0009941,chloroplast envelope; GO:0009570,chloroplast stroma; GO:0016020,membrane; GO:0010287,plastoglobule; GO:0009579,thylakoid; GO:0004332,fructose-bisphosphate aldolase activity; GO:0006094,gluconeogenesis; GO:0006096,glycolytic process; GO:0009737,response to abscisic acid; GO:0046686,response to cadmium ion
Capana01g000010	2140.82	26055.3	3.60458	1.01138e-118	up	GO:0009501,amyloplast; GO:0009507,chloroplast; GO:0102502,ADP-glucose-starch glucosyltransferase activity; GO:0004373,glycogen (starch) synthase activity; GO:0019252,starch biosynthetic process
Capana00g004369	1075.91	5236.2	2.283	1.75495e-117	up	--
Capana00g001096	522.069	8289.99	3.9896	7.09283e-117	up	--
Capana06g003016	100.985	1326.82	3.70837	1.70484e-115	up	GO:0005737,cytoplasm; GO:0005634,nucleus; GO:0000151,ubiquitin ligase complex; GO:0046872,metal ion binding; GO:0031625,ubiquitin protein ligase binding; GO:0004842,ubiquitin-protein transferase activity
Capana03g000834	5.31242	2053.4	8.57006	1.05027e-114	up	GO:0009941,chloroplast envelope; GO:0009570,chloroplast stroma; GO:0005829,cytosol; GO:0005634,nucleus; GO:0005524,ATP binding; GO:0045727,positive regulation of translation; GO:0019538,protein metabolic process; GO:0043335,protein unfolding; GO:0009408,response to heat; GO:0009644,response to high light intensity; GO:0042542,response to hydrogen peroxide
Capana01g000893	1096.97	18890.9	4.10746	3.3171e-114	up	GO:0009507,chloroplast; GO:0005524,ATP binding; GO:0008974,phosphoribulokinase activity; GO:0019253,reductive pentose-phosphate cycle
Capana01g001082	400.208	13846.4	5.11461	3.46281e-113	up	--
Capana03g004300	332.419	1880.37	2.50097	5.86149e-113	up	GO:0009507,chloroplast; GO:0005840,ribosome; GO:0003723,RNA binding
Capana08g002744	840.738	7609.39	3.17916	6.31619e-113	up	GO:0048046,apoplast; GO:0009507,chloroplast; GO:0005829,cytosol; GO:0005777,peroxisome; GO:0008465,glycerate dehydrogenase activity; GO:0030267,glyoxylate reductase (NADP) activity; GO:0016618,hydroxypyruvate reductase activity; GO:0051287,NAD binding; GO:0008266,poly(U) RNA binding; GO:0071482,cellular response to light stimulus; GO:0042631,cellular response to water deprivation; GO:0009854,oxid…
Capana01g002606	8.27964	1887.3	7.81356	1.04939e-112	up	--
Capana01g000644	43.1273	1086.75	4.6466	4.18347e-112	up	GO:0005634,nucleus; GO:0003677,DNA binding; GO:0003700,DNA binding transcription factor activity; GO:0046872,metal ion binding; GO:0009908,flower development; GO:0006355,regulation of transcription, DNA-templated; GO:0006351,transcription, DNA-templated
Capana01g003695	1152.81	8618.55	2.9007	8.33804e-112	up	--
Capana09g001872	656.616	3333.52	2.34357	6.75753e-111	up	GO:0009507,chloroplast; GO:0016209,antioxidant activity; GO:0055114,oxidation-reduction process
Capana07g002272	1044.88	5932.25	2.50455	4.37859e-110	up	--
Capana06g000478	19.9617	1771.66	6.46291	6.06017e-109	up	GO:0005886,plasma membrane; GO:0005524,ATP binding; GO:0004675,transmembrane receptor protein serine/threonine kinase activity; GO:0007166,cell surface receptor signaling pathway; GO:0006952,defense response; GO:0006468,protein phosphorylation
Capana00g003472	330.642	2213.92	2.74514	4.05506e-108	up	--
Capana01g001014	638.084	11810.2	4.2085	3.2821e-107	up	GO:0016021,integral component of membrane; GO:0005743,mitochondrial inner membrane; GO:0070469,respiratory chain; GO:0009916,alternative oxidase activity; GO:0046872,metal ion binding; GO:0102721,ubiquinol:oxygen oxidoreductase activity
Capana12g002701	682.207	4111.84	2.59272	7.04113e-105	up	GO:0009535,chloroplast thylakoid membrane; GO:0016021,integral component of membrane
Capana07g001045	141.441	1674.49	3.55776	5.64816e-104	up	GO:0005737,cytoplasm; GO:0005634,nucleus; GO:0019005,SCF ubiquitin ligase complex; GO:1901149,salicylic acid binding; GO:0031625,ubiquitin protein ligase binding; GO:0009816,defense response to bacterium, incompatible interaction; GO:0009817,defense response to fungus, incompatible interaction; GO:0080185,effector dependent induction by symbiont of host immune response; GO:0043161,proteasome-medi…
Capana01g004357	996.017	8777.75	3.14114	7.29333e-104	up	--
Capana06g002516	83.3352	17137.4	7.68014	3.25728e-103	up	GO:0004066,asparagine synthase (glutamine-hydrolyzing) activity; GO:0005524,ATP binding; GO:0006541,glutamine metabolic process; GO:0070981,L-asparagine biosynthetic process
Capana01g000485	237.108	1929.42	3.02195	1.81252e-102	up	GO:0033772,flavonoid 3',5'-hydroxylase activity; GO:0020037,heme binding; GO:0005506,iron ion binding; GO:0009718,anthocyanin-containing compound biosynthetic process
Capana09g001593	64.0951	1002.84	3.97534	4.73263e-102	up	--
Capana03g000572	379.033	1965.29	2.37373	1.80564e-101	up	GO:0005789,endoplasmic reticulum membrane; GO:0016021,integral component of membrane; GO:0016020,membrane; GO:0005886,plasma membrane; GO:0005506,iron ion binding; GO:0016491,oxidoreductase activity; GO:0043447,alkane biosynthetic process; GO:0042335,cuticle development; GO:0006723,cuticle hydrocarbon biosynthetic process; GO:0008610,lipid biosynthetic process; GO:0006629,lipid metabolic process;…
Capana00g001027	63.3917	1527.28	4.57984	2.14571e-101	up	--
Capana02g001635	5.18821	1524.53	8.14434	2.23793e-101	up	GO:0046872,metal ion binding; GO:0016682,oxidoreductase activity, acting on diphenols and related substances as donors, oxygen as acceptor; GO:0010150,leaf senescence
Capana10g002301	101.605	6227.24	5.92762	4.03562e-101	up	--
Capana00g002182	519.548	3075.5	2.56512	1.86973e-100	up	--
Capana07g002011	1535.36	12865.7	3.06792	2.54143e-100	up	GO:0004364,glutathione transferase activity; GO:0009734,auxin-activated signaling pathway
Capana05g002262	2580.58	11090.2	2.10329	3.52521e-100	up	GO:0005739,mitochondrion; GO:0005524,ATP binding; GO:0042026,protein refolding
Capana00g000627	1094.48	8503.73	2.9593	1.15704e-99	up	--
Capana03g004014	394.768	4550.76	3.52763	1.14528e-98	up	GO:0016021,integral component of membrane; GO:0005524,ATP binding; GO:0016887,ATPase activity
Capana06g001685	8.34721	1178.97	7.22198	1.32844e-98	up	GO:0005783,endoplasmic reticulum; GO:0005789,endoplasmic reticulum membrane; GO:0005887,integral component of plasma membrane; GO:0005886,plasma membrane; GO:0051119,sugar transmembrane transporter activity; GO:0051260,protein homooligomerization
Capana06g000413	362.714	3557.02	3.29194	2.20427e-98	up	--
Capana06g003043	105.138	2039.16	4.26845	2.53313e-98	up	GO:0005737,cytoplasm; GO:0005634,nucleus; GO:0010331,gibberellin binding; GO:0016787,hydrolase activity; GO:0009056,catabolic process; GO:0048444,floral organ morphogenesis; GO:0048530,fruit morphogenesis; GO:0010476,gibberellin mediated signaling pathway; GO:0010629,negative regulation of gene expression; GO:1905516,positive regulation of fertilization; GO:0009939,positive regulation of gibberel…
Capana01g000074	39.7426	959.418	4.59473	6.11517e-98	up	GO:0005886,plasma membrane; GO:0004555,alpha,alpha-trehalase activity; GO:0005993,trehalose catabolic process
Capana03g002619	1168.98	4750.74	2.02401	1.24128e-97	up	GO:0009507,chloroplast; GO:0010287,plastoglobule; GO:0005524,ATP binding; GO:0016301,kinase activity
Capana10g000190	5474.06	25795.2	2.23622	1.5595e-97	up	GO:0005737,cytoplasm; GO:0005524,ATP binding; GO:0051082,unfolded protein binding; GO:0006457,protein folding; GO:0006950,response to stress
Capana09g001866	171.119	2732.31	3.99307	4.07833e-97	up	GO:0005886,plasma membrane; GO:0005524,ATP binding; GO:0004675,transmembrane receptor protein serine/threonine kinase activity; GO:0009742,brassinosteroid mediated signaling pathway; GO:0007166,cell surface receptor signaling pathway; GO:1900459,positive regulation of brassinosteroid mediated signaling pathway; GO:0006468,protein phosphorylation
Capana03g000146	170.889	1187.37	2.79605	2.65154e-96	up	--
Capana05g002275	55.5394	3640.06	6.05399	6.98579e-95	up	GO:0009507,chloroplast; GO:0009570,chloroplast stroma; GO:0009536,plastid; GO:0051539,4 iron, 4 sulfur cluster binding; GO:0005507,copper ion binding; GO:0004160,dihydroxy-acid dehydratase activity; GO:0016836,hydro-lyase activity; GO:0009082,branched-chain amino acid biosynthetic process; GO:0009553,embryo sac development; GO:0009097,isoleucine biosynthetic process; GO:0009555,pollen development…
Capana03g000434	174.857	1545.64	3.14559	3.63577e-94	up	GO:0010287,plastoglobule
Capana01g004465	8.92614	915.528	6.70918	1.0799e-93	up	--
Capana03g001004	358.591	3140.2	3.12921	2.48033e-93	up	GO:0009507,chloroplast; GO:0005739,mitochondrion; GO:0015035,protein disulfide oxidoreductase activity; GO:0042246,tissue regeneration
Capana07g002081	902.093	5107.39	2.50165	3.95918e-93	up	--
Capana06g001108	792.427	3713.6	2.22898	1.27212e-91	up	GO:0009507,chloroplast; GO:0009570,chloroplast stroma; GO:0009535,chloroplast thylakoid membrane; GO:0009735,response to cytokinin
Capana10g000627	56.82	1253.79	4.44815	1.29598e-91	up	--
Capana12g001790	519.383	3328.58	2.67954	1.58336e-91	up	GO:0009507,chloroplast; GO:0009941,chloroplast envelope; GO:0031969,chloroplast membrane; GO:0016021,integral component of membrane; GO:0005524,ATP binding; GO:0016301,kinase activity; GO:0005215,transporter activity; GO:0034599,cellular response to oxidative stress; GO:0007623,circadian rhythm; GO:0055072,iron ion homeostasis; GO:0010150,leaf senescence; GO:0046467,membrane lipid biosynthetic pr…
Capana02g002131	221.772	7202.46	5.02434	2.84876e-90	up	GO:0003824,catalytic activity; GO:0010286,heat acclimation; GO:0010608,posttranscriptional regulation of gene expression; GO:0009408,response to heat
Capana03g001546	24.1675	2437.61	6.63423	2.93163e-90	up	GO:0005634,nucleus; GO:0003677,DNA binding; GO:0003700,DNA binding transcription factor activity; GO:0007623,circadian rhythm; GO:0006355,regulation of transcription, DNA-templated; GO:0046686,response to cadmium ion; GO:0009723,response to ethylene; GO:0009651,response to salt stress; GO:0006351,transcription, DNA-templated
Capana08g002000	2919.89	10734.8	1.87891	2.9502e-90	up	GO:0009941,chloroplast envelope; GO:0005634,nucleus; GO:0043531,ADP binding; GO:0005524,ATP binding; GO:0003700,DNA binding transcription factor activity; GO:0004674,protein serine/threonine kinase activity; GO:0043565,sequence-specific DNA binding; GO:0006952,defense response; GO:0006351,transcription, DNA-templated
Capana07g001125	1712.73	12937.5	2.91724	7.2502e-90	up	GO:0005777,peroxisome; GO:0046592,polyamine oxidase activity; GO:0006598,polyamine catabolic process
Capana12g000210	624.052	3803.88	2.60865	1.80167e-89	up	GO:0009507,chloroplast; GO:0005524,ATP binding; GO:0005509,calcium ion binding; GO:0005525,GTP binding; GO:0008728,GTP diphosphokinase activity; GO:0016301,kinase activity; GO:0015969,guanosine tetraphosphate metabolic process
Capana06g002374	5256.53	18572.6	1.82106	2.09581e-89	up	GO:0009507,chloroplast; GO:0046872,metal ion binding; GO:0004784,superoxide dismutase activity
Capana02g003027	104.881	1453.36	3.80199	2.34051e-89	up	GO:0016021,integral component of membrane; GO:0020037,heme binding; GO:0005506,iron ion binding; GO:0004497,monooxygenase activity; GO:0016705,oxidoreductase activity, acting on paired donors, with incorporation or reduction of molecular oxygen
Capana03g001471	27.8061	2150.68	6.26309	3.54887e-89	up	GO:0004867,serine-type endopeptidase inhibitor activity
Capana06g002561	5806.26	21680.5	1.9008	1.3879e-88	up	GO:0009507,chloroplast; GO:0004130,cytochrome-c peroxidase activity; GO:0020037,heme binding; GO:0016688,L-ascorbate peroxidase activity; GO:0046872,metal ion binding; GO:0034599,cellular response to oxidative stress; GO:0042744,hydrogen peroxide catabolic process; GO:0000302,response to reactive oxygen species
Capana04g000076	13.3427	827.923	5.96361	1.95249e-88	up	GO:0005634,nucleus; GO:0005886,plasma membrane; GO:0005524,ATP binding; GO:0004675,transmembrane receptor protein serine/threonine kinase activity; GO:0007166,cell surface receptor signaling pathway; GO:0006952,defense response; GO:0006468,protein phosphorylation
Capana03g002073	72.1249	1418.47	4.30583	2.02751e-88	up	GO:0009507,chloroplast; GO:0005739,mitochondrion; GO:0003677,DNA binding; GO:0003700,DNA binding transcription factor activity; GO:0001053,plastid sigma factor activity; GO:0016987,bacterial sigma factor activity; GO:0071483,cellular response to blue light; GO:0071472,cellular response to salt stress; GO:0009658,chloroplast organization; GO:0006352,DNA-templated transcription, initiation; GO:0009…
Capana01g000575	899.321	20207.9	4.4915	5.04381e-87	up	GO:0009570,chloroplast stroma
Capana10g002425	630.217	3481.26	2.46445	1.33187e-86	up	--
Capana03g000806	1775.63	12946.9	2.86669	2.07225e-86	up	GO:0009535,chloroplast thylakoid membrane; GO:0046872,metal ion binding; GO:0004750,ribulose-phosphate 3-epimerase activity; GO:0006098,pentose-phosphate shunt; GO:0019253,reductive pentose-phosphate cycle
Capana05g002535	1126.26	5549.76	2.30209	2.10471e-85	up	GO:0009507,chloroplast; GO:0009570,chloroplast stroma; GO:0009534,chloroplast thylakoid; GO:0008047,enzyme activator activity; GO:0004857,enzyme inhibitor activity; GO:0016671,oxidoreductase activity, acting on a sulfur group of donors, disulfide as acceptor; GO:0015035,protein disulfide oxidoreductase activity; GO:0019904,protein domain specific binding; GO:0047134,protein-disulfide reductase ac…
Capana08g002758	500.872	2337.06	2.22476	5.03462e-85	up	--
Capana03g002193	496.586	2232.42	2.16918	8.30371e-85	up	--
Capana12g000115	3141.06	8214.76	1.3871	1.48886e-84	up	--
Capana07g001127	933.206	3853.13	2.0462	1.51429e-84	up	GO:0009507,chloroplast; GO:0009941,chloroplast envelope; GO:0009535,chloroplast thylakoid membrane; GO:0010287,plastoglobule; GO:0016491,oxidoreductase activity
Capana08g002156	1620.86	9736.12	2.58673	2.14009e-84	up	GO:0005783,endoplasmic reticulum; GO:0005789,endoplasmic reticulum membrane; GO:0005794,Golgi apparatus; GO:0016021,integral component of membrane; GO:0005886,plasma membrane; GO:0005774,vacuolar membrane; GO:0005773,vacuole; GO:0004040,amidase activity; GO:0103073,anandamide amidohydrolase activity; GO:0047412,N-(long-chain-acyl)ethanolamine deacylase activity; GO:0102077,oleamide hydrolase acti…
Capana08g000667	232.535	2000.79	3.10702	9.68981e-84	up	--
Capana08g000876	8.84882	2126.33	7.88951	1.06714e-83	up	GO:0047501,(+)-neomenthol dehydrogenase activity; GO:0006952,defense response
Capana10g000688	119.885	2487.04	4.37694	3.34675e-83	up	--
Capana09g001911	176.466	2924.54	4.04634	2.54828e-82	up	GO:0016021,integral component of membrane; GO:0020037,heme binding; GO:0005506,iron ion binding; GO:0004497,monooxygenase activity; GO:0016705,oxidoreductase activity, acting on paired donors, with incorporation or reduction of molecular oxygen
Capana01g001386	1375.96	9412.1	2.77483	5.60978e-82	up	--
Capana00g003967	1.47432	9187.48	12.5784	8.92423e-82	up	--
Capana10g000698	76.4721	1821.26	4.55999	9.23362e-82	up	GO:0005634,nucleus; GO:0003700,DNA binding transcription factor activity; GO:0044212,transcription regulatory region DNA binding; GO:0007623,circadian rhythm; GO:0048574,long-day photoperiodism, flowering; GO:0042754,negative regulation of circadian rhythm; GO:0043433,negative regulation of DNA binding transcription factor activity; GO:0042752,regulation of circadian rhythm; GO:0006355,regulation…
Capana04g002762	89.0665	3402.65	5.26838	1.32555e-81	up	GO:0006952,defense response; GO:0009607,response to biotic stimulus
Capana02g003595	41.3128	707.913	4.10701	2.23961e-81	up	GO:0016021,integral component of membrane; GO:0016757,transferase activity, transferring glycosyl groups
Capana03g002227	6.70013	1023.09	7.16782	3.86549e-81	up	--
Capana03g001755	89.5776	2335.23	4.6958	8.15155e-81	up	GO:0003914,DNA (6-4) photolyase activity; GO:0003677,DNA binding; GO:0000166,nucleotide binding; GO:0006281,DNA repair; GO:0009411,response to UV
Capana02g001645	1011.29	7452.69	2.88244	1.42453e-80	up	--
Capana04g000362	613.54	4434.77	2.85433	4.49533e-80	up	GO:0016021,integral component of membrane
Capana00g001320	38.8911	801.245	4.35477	5.59378e-80	up	--
Capana11g002270	15.1006	1245.26	6.35388	3.24843e-79	up	--
Capana09g002179	174.945	1871.77	3.41377	1.23853e-78	up	GO:0005783,endoplasmic reticulum; GO:0016021,integral component of membrane; GO:0008289,lipid binding; GO:0046872,metal ion binding; GO:0006869,lipid transport
Capana00g002899	270.55	3498.92	3.69317	2.16968e-78	up	--
Capana01g001648	130.631	1012.91	2.95192	3.83912e-78	up	GO:0009507,chloroplast; GO:0009941,chloroplast envelope; GO:0009534,chloroplast thylakoid; GO:0009535,chloroplast thylakoid membrane; GO:0016020,membrane
Capana04g002884	374.541	2851.78	2.92656	1.22629e-77	up	GO:0016021,integral component of membrane; GO:0005765,lysosomal membrane; GO:0005774,vacuolar membrane; GO:0015184,L-cystine transmembrane transporter activity; GO:0015811,L-cystine transport
Capana08g002264	834.35	11785.9	3.82115	1.85467e-77	up	GO:0005737,cytoplasm; GO:0010286,heat acclimation; GO:0009408,response to heat; GO:0009644,response to high light intensity; GO:0042542,response to hydrogen peroxide
Capana00g003264	74.253	1069.25	3.85584	1.9833e-77	up	--
Capana05g000531	2420.8	5978.37	1.30413	2.25363e-77	up	GO:0009507,chloroplast; GO:0005829,cytosol; GO:0004107,chorismate synthase activity; GO:0010181,FMN binding; GO:0009073,aromatic amino acid family biosynthetic process; GO:0009423,chorismate biosynthetic process
Capana08g002023	2116	5802.45	1.4547	2.25541e-77	up	GO:0005829,cytosol; GO:0016020,membrane; GO:0016607,nuclear speck; GO:0005681,spliceosomal complex; GO:0003729,mRNA binding; GO:0000398,mRNA splicing, via spliceosome; GO:0008380,RNA splicing
Capana12g000601	153.632	1163.34	2.92586	2.80377e-77	up	GO:0016021,integral component of membrane; GO:0046872,metal ion binding; GO:0061630,ubiquitin protein ligase activity; GO:0004842,ubiquitin-protein transferase activity; GO:0043161,proteasome-mediated ubiquitin-dependent protein catabolic process; GO:0016567,protein ubiquitination
Capana08g000974	357.677	2004.42	2.48903	2.80402e-77	up	GO:0005634,nucleus; GO:0003677,DNA binding; GO:0003700,DNA binding transcription factor activity; GO:0042752,regulation of circadian rhythm; GO:0009737,response to abscisic acid; GO:0046686,response to cadmium ion; GO:0009723,response to ethylene; GO:0009739,response to gibberellin; GO:0009753,response to jasmonic acid; GO:0009751,response to salicylic acid; GO:0009651,response to salt stress; GO…
Capana09g000176	371.48	2356.45	2.66833	3.02417e-77	up	GO:0005524,ATP binding; GO:0004674,protein serine/threonine kinase activity; GO:0004842,ubiquitin-protein transferase activity
Capana04g000841	281.032	1963.7	2.80665	4.42069e-77	up	--
Capana02g002017	2404.94	6156.58	1.35595	3.46862e-76	up	GO:0048046,apoplast; GO:0009507,chloroplast; GO:0009941,chloroplast envelope; GO:0009570,chloroplast stroma; GO:0010319,stromule; GO:0009579,thylakoid; GO:0035798,2-alkenal reductase (NADP+) activity; GO:0035671,enone reductase activity; GO:0008270,zinc ion binding; GO:0055114,oxidation-reduction process; GO:0009409,response to cold
Capana10g000403	103.611	1221.03	3.55348	5.13096e-76	up	--
Capana08g002396	2563.18	8293.78	1.69474	8.75647e-76	up	GO:0048046,apoplast; GO:0009507,chloroplast; GO:0009941,chloroplast envelope; GO:0009570,chloroplast stroma; GO:0005759,mitochondrial matrix; GO:0005739,mitochondrion; GO:0046872,metal ion binding; GO:0004222,metalloendopeptidase activity; GO:0016485,protein processing; GO:0046686,response to cadmium ion
Capana01g002306	688.155	3309.53	2.26535	8.95425e-76	up	--
Capana12g000826	32.8692	960.525	4.8643	2.19403e-75	up	GO:0016021,integral component of membrane; GO:0005886,plasma membrane; GO:0015172,acidic amino acid transmembrane transporter activity; GO:0015175,neutral amino acid transmembrane transporter activity; GO:0015293,symporter activity; GO:0015810,aspartate transmembrane transport; GO:0015827,tryptophan transport
Capana10g000033	1612.93	5911.55	1.87353	4.13314e-75	up	GO:0009507,chloroplast; GO:0005840,ribosome; GO:0019843,rRNA binding; GO:0003735,structural constituent of ribosome; GO:0006412,translation
Capana12g002306	338.576	1445.6	2.09372	6.94442e-75	up	GO:0016021,integral component of membrane; GO:0046872,metal ion binding; GO:0016757,transferase activity, transferring glycosyl groups; GO:0006486,protein glycosylation
Capana04g001615	293.465	1823.35	2.63392	7.99806e-75	up	--
Capana04g000899	194.076	1447.86	2.89435	1.94244e-74	up	GO:0005634,nucleus; GO:0000160,phosphorelay signal transduction system; GO:0006355,regulation of transcription, DNA-templated; GO:0048511,rhythmic process; GO:0006351,transcription, DNA-templated
Capana02g003451	322.376	1486.21	2.20386	2.98887e-74	up	GO:0016021,integral component of membrane; GO:0022857,transmembrane transporter activity; GO:0009624,response to nematode
Capana06g000387	2649.23	21380.9	3.01283	3.56059e-74	up	GO:0005737,cytoplasm
Capana12g000204	2029.55	14794.6	2.86595	1.31447e-73	up	GO:0005829,cytosol; GO:0004144,diacylglycerol O-acyltransferase activity; GO:0006071,glycerol metabolic process; GO:0019432,triglyceride biosynthetic process
Capana00g004816	6.03032	1075.34	7.54146	1.64115e-73	up	--
Capana05g001982	2604.55	8391.83	1.68844	1.98525e-73	up	GO:0005622,intracellular; GO:0005886,plasma membrane; GO:0004435,phosphatidylinositol phospholipase C activity; GO:0004629,phospholipase C activity; GO:0004871,signal transducer activity; GO:0042742,defense response to bacterium; GO:0009553,embryo sac development; GO:0048437,floral organ development; GO:0035556,intracellular signal transduction; GO:0016042,lipid catabolic process; GO:0009556,micr…
Capana12g001317	1081.74	6599.35	2.60976	2.88739e-73	up	--
Capana05g001095	581.322	3409.75	2.55352	3.46411e-73	up	GO:0046872,metal ion binding; GO:0016491,oxidoreductase activity
Capana05g001371	441.499	2989.81	2.76027	7.57295e-73	up	--
Capana03g001025	1211.56	4693.92	1.95331	2.04414e-72	up	GO:0009507,chloroplast; GO:0005829,cytosol; GO:0005739,mitochondrion; GO:0010181,FMN binding; GO:0046872,metal ion binding; GO:0052856,NADHX epimerase activity; GO:0052857,NADPHX epimerase activity; GO:0004733,pyridoxamine-phosphate oxidase activity; GO:0006734,NADH metabolic process; GO:0006739,NADP metabolic process; GO:0008615,pyridoxine biosynthetic process
Capana01g000732	300.682	1681.74	2.48657	2.89145e-72	up	GO:0005737,cytoplasm; GO:0005634,nucleus; GO:0005524,ATP binding; GO:0004674,protein serine/threonine kinase activity; GO:0009738,abscisic acid-activated signaling pathway; GO:0035556,intracellular signal transduction; GO:0006468,protein phosphorylation
Capana03g000109	2846.23	7287.68	1.35649	1.36514e-71	up	GO:0004029,aldehyde dehydrogenase (NAD) activity; GO:0006081,cellular aldehyde metabolic process
Capana12g002880	531.348	5569.26	3.39214	1.89121e-71	up	--
Capana04g001590	2314.42	14725.6	2.66913	2.14114e-71	up	GO:0005737,cytoplasm; GO:0005634,nucleus; GO:0007049,cell cycle; GO:0051301,cell division
Capana01g000260	396.151	1694.04	2.09536	2.4899e-71	up	--
Capana09g001763	14.176	714.543	5.67858	3.1236e-71	up	GO:0004364,glutathione transferase activity; GO:0009734,auxin-activated signaling pathway
Capana01g002297	9.41845	826.625	6.4015	3.21128e-71	up	GO:0031359,integral component of chloroplast outer membrane; GO:0031305,integral component of mitochondrial inner membrane; GO:0005744,mitochondrial inner membrane presequence translocase complex; GO:0009527,plastid outer membrane; GO:0046930,pore complex; GO:0015171,amino acid transmembrane transporter activity; GO:0015288,porin activity; GO:0015266,NA; GO:0042803,protein homodimerization activi…
Capana06g001173	2803.14	6550.13	1.22475	3.77601e-71	up	GO:0005634,nucleus; GO:0003729,mRNA binding; GO:0006397,mRNA processing
Capana01g002430	1810.55	5807.14	1.68156	1.00421e-70	up	GO:0009507,chloroplast; GO:0004072,aspartate kinase activity; GO:0005524,ATP binding; GO:0004412,homoserine dehydrogenase activity; GO:0050661,NADP binding; GO:0009089,lysine biosynthetic process via diaminopimelate; GO:0009086,methionine biosynthetic process; GO:0009088,threonine biosynthetic process
Capana02g002632	47.9762	698.65	3.8583	1.54952e-70	up	GO:0005783,endoplasmic reticulum; GO:0016021,integral component of membrane; GO:0016020,membrane; GO:0020037,heme binding; GO:0005506,iron ion binding; GO:0004497,monooxygenase activity; GO:0016709,oxidoreductase activity, acting on paired donors, with incorporation or reduction of molecular oxygen, NAD(P)H as one donor, and incorporation of one atom of oxygen; GO:0009809,lignin biosynthetic proc…
Capana01g004121	147.696	902.848	2.61125	1.63408e-70	up	GO:0005829,cytosol; GO:0019898,extrinsic component of membrane; GO:0005634,nucleus; GO:0034045,phagophore assembly site membrane; GO:0005774,vacuolar membrane; GO:0080025,phosphatidylinositol-3,5-bisphosphate binding; GO:0032266,phosphatidylinositol-3-phosphate binding; GO:0006914,autophagy; GO:0000422,autophagy of mitochondrion; GO:0044804,autophagy of nucleus; GO:0050832,defense response to fun…
Capana03g000399	600.211	4514.11	2.91275	1.91254e-70	up	--
Capana09g001785	2474.79	31020	3.64839	8.31945e-70	up	GO:0009570,chloroplast stroma; GO:0005524,ATP binding; GO:0042802,identical protein binding
Capana08g002322	92.2473	1666.94	4.17248	1.055e-69	up	GO:0042802,identical protein binding; GO:0050275,scopoletin glucosyltransferase activity; GO:0008152,metabolic process
Capana01g000402	218.667	1479.35	2.75628	1.20089e-69	up	--
Capana00g001365	817.629	4899.34	2.58489	1.27464e-69	up	--
Capana02g002217	454.866	2770.79	2.60641	5.32152e-69	up	--
Capana08g001107	3535.67	11660	1.72144	5.6498e-69	up	GO:0005789,endoplasmic reticulum membrane; GO:0016021,integral component of membrane; GO:0031090,organelle membrane; GO:0020037,heme binding; GO:0046872,metal ion binding; GO:0055114,oxidation-reduction process
Capana03g001308	427.253	2293.1	2.42453	5.8787e-69	up	GO:0009507,chloroplast; GO:0009941,chloroplast envelope; GO:0009570,chloroplast stroma; GO:0016787,hydrolase activity; GO:0046872,metal ion binding; GO:0008152,metabolic process
Capana00g004034	151.965	1360.78	3.15958	6.04828e-69	up	--
Capana08g000767	5.81021	901.982	7.23852	6.90744e-69	up	--
Capana01g000610	197.363	2377.32	3.5908	7.91979e-69	up	GO:0009793,embryo development ending in seed dormancy; GO:0098755,maintenance of seed dormancy by absisic acid; GO:0010029,regulation of seed germination; GO:0009845,seed germination
Capana06g002581	95.5317	1545.36	4.02206	8.34523e-69	up	--
Capana07g001600	88.8689	1832.93	4.36553	8.79058e-69	up	GO:0009507,chloroplast; GO:0005524,ATP binding; GO:0002238,response to molecule of fungal origin; GO:0006950,response to stress
Capana09g000934	657.412	2237.72	1.76723	1.74631e-68	up	GO:0005634,nucleus; GO:0005524,ATP binding; GO:0042802,identical protein binding; GO:0004672,protein kinase activity; GO:0009585,red, far-red light phototransduction
Capana00g003675	1433.23	11641.4	3.02293	3.47989e-68	up	--
Capana07g000054	14.5598	724.374	5.60896	4.59276e-68	up	GO:0005840,ribosome; GO:0003735,structural constituent of ribosome; GO:0006412,translation
Capana01g000509	5525.61	17302.1	1.64691	6.46285e-68	up	GO:0005829,cytosol; GO:0005634,nucleus; GO:0005886,plasma membrane; GO:0051879,Hsp90 protein binding; GO:0070678,preprotein binding; GO:0051131,chaperone-mediated protein complex assembly; GO:0046686,response to cadmium ion
Capana05g001169	335.218	2273.55	2.76153	9.6847e-68	up	--
Capana01g002025	11957.7	48883.1	2.0315	1.17997e-67	up	GO:0009507,chloroplast; GO:0005524,ATP binding; GO:0042026,protein refolding
Capana10g000085	218.57	2877.3	3.71717	1.58871e-67	up	GO:0005829,cytosol; GO:0004838,L-tyrosine:2-oxoglutarate aminotransferase activity; GO:0030170,pyridoxal phosphate binding; GO:0006572,tyrosine catabolic process; GO:0010189,vitamin E biosynthetic process
Capana02g002441	245.526	1708.97	2.79661	1.71242e-67	up	--
Capana03g000465	1181.92	5625	2.25107	1.93559e-67	up	GO:0005737,cytoplasm; GO:0005829,cytosol; GO:0010008,endosome membrane; GO:0035091,phosphatidylinositol binding; GO:0015031,protein transport
Capana11g001877	245.383	2024.2	3.04878	2.5025e-67	up	GO:0009507,chloroplast; GO:0030785,[ribulose-bisphosphate carboxylase]-lysine N-methyltransferase activity
Capana03g004141	1790.04	8797.68	2.29707	2.72658e-67	up	GO:0005737,cytoplasm; GO:0005634,nucleus; GO:0005516,calmodulin binding; GO:0005528,FK506 binding; GO:0003755,peptidyl-prolyl cis-trans isomerase activity; GO:0070370,cellular heat acclimation; GO:0061077,chaperone-mediated protein folding
Capana00g003391	1760.18	5144.2	1.5473	4.4751e-67	up	--
Capana03g002218	1667.31	6847.11	2.03868	5.28176e-67	up	GO:0009706,chloroplast inner membrane; GO:0005516,calmodulin binding; GO:0016491,oxidoreductase activity; GO:0015031,protein transport
Capana09g000838	2920.81	8958.71	1.61708	7.25145e-67	up	GO:0005783,endoplasmic reticulum; GO:0010168,ER body; GO:0005622,intracellular; GO:0005773,vacuole; GO:0004521,endoribonuclease activity; GO:0033897,ribonuclease T2 activity; GO:0003723,RNA binding; GO:0010507,negative regulation of autophagy; GO:0016075,rRNA catabolic process
Capana04g000024	252.85	3256.82	3.69011	1.18634e-66	up	GO:0009941,chloroplast envelope; GO:0009535,chloroplast thylakoid membrane; GO:0016021,integral component of membrane; GO:0009522,photosystem I; GO:0009523,photosystem II; GO:0010287,plastoglobule; GO:0016168,chlorophyll binding; GO:0031409,pigment binding; GO:0009768,photosynthesis, light harvesting in photosystem I; GO:0018298,protein-chromophore linkage; GO:0009637,response to blue light; GO:0…
Capana07g000110	220.866	1062.42	2.26485	1.84192e-66	up	GO:0009507,chloroplast; GO:0005675,holo TFIIH complex; GO:0006281,DNA repair; GO:0000079,regulation of cyclin-dependent protein serine/threonine kinase activity; GO:0006357,regulation of transcription by RNA polymerase II
Capana05g002105	1252.37	5102.83	2.02737	2.1742e-66	up	GO:0005634,nucleus; GO:0047627,adenylylsulfatase activity; GO:0005524,ATP binding; GO:0003677,DNA binding; GO:0046872,metal ion binding; GO:0046983,protein dimerization activity; GO:0006260,DNA replication; GO:0009150,purine ribonucleotide metabolic process; GO:0006355,regulation of transcription, DNA-templated; GO:0006790,sulfur compound metabolic process; GO:0006351,transcription, DNA-templated
Capana01g001678	336.322	1420.01	2.07576	2.7913e-66	up	GO:0005524,ATP binding; GO:0003951,NAD+ kinase activity; GO:0042736,NADH kinase activity; GO:0019674,NAD metabolic process; GO:0006741,NADP biosynthetic process
Capana05g001562	267.956	2290.76	3.09813	3.08284e-66	up	GO:0009535,chloroplast thylakoid membrane; GO:0045261,proton-transporting ATP synthase complex, catalytic core F(1); GO:0046933,proton-transporting ATP synthase activity, rotational mechanism; GO:0015986,ATP synthesis coupled proton transport
Capana03g001979	489.069	1952.28	1.99906	7.9323e-66	up	GO:0009507,chloroplast; GO:0009570,chloroplast stroma; GO:0005737,cytoplasm; GO:0016021,integral component of membrane; GO:0005730,nucleolus; GO:0005634,nucleus; GO:0009579,thylakoid; GO:0046872,metal ion binding; GO:0016791,phosphatase activity; GO:0004722,protein serine/threonine phosphatase activity; GO:0016311,dephosphorylation; GO:0009767,photosynthetic electron transport chain; GO:0080005,p…
Capana11g002353	17.7847	527.326	4.8761	4.46698e-65	up	GO:0009507,chloroplast; GO:0016021,integral component of membrane; GO:0015297,antiporter activity; GO:0015238,drug transmembrane transporter activity; GO:0006855,drug transmembrane transport
Capana11g000757	98.8498	3697.93	5.21854	4.69506e-65	up	GO:0005634,nucleus; GO:0003700,DNA binding transcription factor activity; GO:0000981,RNA polymerase II transcription factor activity, sequence-specific DNA binding; GO:0043565,sequence-specific DNA binding; GO:0001135,transcription factor activity, RNA polymerase II transcription factor recruiting; GO:0044212,transcription regulatory region DNA binding; GO:0030154,cell differentiation; GO:0006357…
Capana03g004035	3.01075	1528.97	8.99191	4.89064e-65	up	GO:0005829,cytosol; GO:0005654,nucleoplasm; GO:0005634,nucleus; GO:0032440,2-alkenal reductase [NAD(P)] activity; GO:0046686,response to cadmium ion; GO:0006979,response to oxidative stress
Capana03g003057	313.824	1644.83	2.38677	5.12762e-65	up	GO:0016021,integral component of membrane; GO:0005774,vacuolar membrane; GO:0015171,amino acid transmembrane transporter activity; GO:0003333,amino acid transmembrane transport
Capana03g002616	180.16	1635.74	3.18711	5.25253e-65	up	--
Capana10g002227	361.342	3064.96	3.08601	5.28883e-65	up	GO:0005886,plasma membrane; GO:0009738,abscisic acid-activated signaling pathway; GO:1900458,negative regulation of brassinosteroid mediated signaling pathway
Capana03g001063	101.14	964.065	3.25033	6.98666e-65	up	GO:0016021,integral component of membrane; GO:0005886,plasma membrane; GO:0009506,plasmodesma; GO:0090448,glucosinolate:proton symporter activity; GO:1901349,glucosinolate transport; GO:0090449,phloem glucosinolate loading; GO:0080167,response to karrikin
Capana11g002235	472.566	2546.68	2.43117	7.21182e-65	up	GO:0009507,chloroplast; GO:0005739,mitochondrion; GO:0004177,aminopeptidase activity; GO:0046872,metal ion binding; GO:0008235,metalloexopeptidase activity; GO:0031365,N-terminal protein amino acid modification
Capana08g002141	3135.85	10891.9	1.79692	1.65505e-64	up	GO:0009514,glyoxysome; GO:0030060,L-malate dehydrogenase activity; GO:0006097,glyoxylate cycle; GO:0006108,malate metabolic process; GO:0006099,tricarboxylic acid cycle
Capana06g001572	539.443	2267.78	2.07287	4.37523e-64	up	--
Capana01g004117	690.047	3368.46	2.28892	5.01598e-64	up	--
Capana06g000346	1118.98	11349.4	3.34347	5.74297e-64	up	GO:0005634,nucleus; GO:0003677,DNA binding; GO:0003700,DNA binding transcription factor activity; GO:0046872,metal ion binding; GO:0050832,defense response to fungus; GO:0006355,regulation of transcription, DNA-templated; GO:0010200,response to chitin; GO:0009409,response to cold
Capana07g002106	21.6033	1215.56	5.82063	5.76245e-64	up	GO:0016021,integral component of membrane; GO:0020037,heme binding; GO:0005506,iron ion binding; GO:0004497,monooxygenase activity; GO:0016705,oxidoreductase activity, acting on paired donors, with incorporation or reduction of molecular oxygen
Capana10g000141	6309.64	41029.7	2.70124	8.7025e-64	up	GO:0009941,chloroplast envelope; GO:0009535,chloroplast thylakoid membrane; GO:0016021,integral component of membrane; GO:0009522,photosystem I; GO:0009523,photosystem II; GO:0010287,plastoglobule; GO:0016168,chlorophyll binding; GO:0046872,metal ion binding; GO:0031409,pigment binding; GO:0009768,photosynthesis, light harvesting in photosystem I; GO:0018298,protein-chromophore linkage; GO:000941…
Capana08g001250	57.6812	747.756	3.6836	8.7291e-64	up	GO:0016491,oxidoreductase activity; GO:0009820,alkaloid metabolic process
Capana02g001197	1451.57	4161.39	1.51971	8.97835e-64	up	GO:0016021,integral component of membrane; GO:0005886,plasma membrane; GO:0015079,potassium ion transmembrane transporter activity
Capana08g000736	11309.9	47667.1	2.0753	1.37988e-63	up	GO:0005634,nucleus; GO:0016740,transferase activity; GO:0008270,zinc ion binding; GO:0016567,protein ubiquitination
Capana00g002081	819.338	5396.08	2.72001	1.57062e-63	up	--
Capana05g001105	516.934	2666.69	2.36794	1.92119e-63	up	GO:0009507,chloroplast; GO:0005524,ATP binding; GO:0004618,phosphoglycerate kinase activity; GO:0006096,glycolytic process; GO:0019253,reductive pentose-phosphate cycle
Capana06g001078	444.104	2707.78	2.60537	3.26559e-63	up	GO:0005886,plasma membrane; GO:0005774,vacuolar membrane; GO:0005524,ATP binding; GO:0016887,ATPase activity; GO:0005315,inorganic phosphate transmembrane transporter activity; GO:0005215,transporter activity; GO:0035435,phosphate ion transmembrane transport
Capana01g002556	825.76	2484.84	1.58832	3.3214e-63	up	GO:0005739,mitochondrion; GO:0005524,ATP binding; GO:0031072,heat shock protein binding; GO:0046872,metal ion binding; GO:0051082,unfolded protein binding; GO:0051085,chaperone cofactor-dependent protein refolding; GO:0009558,embryo sac cellularization; GO:0009553,embryo sac development; GO:0000740,nuclear membrane fusion; GO:0010197,polar nucleus fusion; GO:0009408,response to heat; GO:0010198,s…
Capana03g003248	13.6596	1364.77	6.66626	3.94003e-63	up	GO:0005737,cytoplasm; GO:0005634,nucleus; GO:0003700,DNA binding transcription factor activity; GO:0043565,sequence-specific DNA binding; GO:0006351,transcription, DNA-templated
Capana07g002440	66.5712	1050.49	3.97989	5.07173e-63	up	GO:0031225,anchored component of membrane; GO:0005886,plasma membrane; GO:0090406,pollen tube; GO:0045927,positive regulation of growth
Capana08g001333	1388.02	6128.49	2.14187	5.74943e-63	up	GO:0005789,endoplasmic reticulum membrane; GO:0016021,integral component of membrane; GO:0005886,plasma membrane; GO:0046907,intracellular transport; GO:0016032,viral process
Capana08g002809	926.965	5513.24	2.57273	1.86317e-62	up	GO:0009842,cyanelle; GO:0016491,oxidoreductase activity
Capana12g000506	2861.25	15412.6	2.42941	2.79908e-62	up	GO:0008234,cysteine-type peptidase activity
Capana09g000346	154	1250.63	3.02318	3.95459e-62	up	GO:0009507,chloroplast; GO:0009535,chloroplast thylakoid membrane; GO:0010287,plastoglobule
Capana08g001541	641.845	20959.6	5.02745	4.24572e-62	up	--
Capana08g001155	83.7563	1442.8	4.10239	5.66324e-62	up	GO:0007623,circadian rhythm; GO:0006355,regulation of transcription, DNA-templated; GO:0006351,transcription, DNA-templated
Capana03g001703	2229.73	6963.34	1.64318	7.6414e-62	up	GO:0005829,cytosol; GO:0005783,endoplasmic reticulum; GO:0005576,extracellular region; GO:0050897,cobalt ion binding; GO:0004869,cysteine-type endopeptidase inhibitor activity; GO:0002020,protease binding; GO:0006952,defense response; GO:0006972,hyperosmotic response; GO:2000117,negative regulation of cysteine-type endopeptidase activity; GO:0009409,response to cold; GO:0006979,response to oxidat…
Capana04g000081	3377.78	14312.1	2.08277	1.23091e-61	up	GO:0009514,glyoxysome; GO:0005739,mitochondrion; GO:0005777,peroxisome; GO:0004096,catalase activity; GO:0020037,heme binding; GO:0046872,metal ion binding; GO:0042744,hydrogen peroxide catabolic process; GO:0042542,response to hydrogen peroxide
Capana00g003839	227.294	1722.21	2.91879	1.65387e-61	up	--
Capana08g002304	655.075	5089.79	2.95807	1.71885e-61	up	GO:0045551,cinnamyl-alcohol dehydrogenase activity; GO:0052747,sinapyl alcohol dehydrogenase activity; GO:0008270,zinc ion binding; GO:0009809,lignin biosynthetic process
Capana03g004576	163.681	934.453	2.50969	1.79954e-61	up	GO:0009507,chloroplast; GO:0031969,chloroplast membrane; GO:0009535,chloroplast thylakoid membrane; GO:0016021,integral component of membrane; GO:0006979,response to oxidative stress
Capana04g000572	323.986	1510.83	2.21846	5.01038e-61	up	--
Capana04g001175	677.783	2790.69	2.04363	8.3986e-61	up	GO:0009507,chloroplast; GO:0009941,chloroplast envelope; GO:0009535,chloroplast thylakoid membrane
Capana04g000551	330.221	1857.57	2.49574	1.16853e-60	up	GO:0005634,nucleus; GO:0003677,DNA binding; GO:0003700,DNA binding transcription factor activity; GO:0009738,abscisic acid-activated signaling pathway; GO:0006351,transcription, DNA-templated
Capana01g003889	101.334	3012.84	4.89314	1.8935e-60	up	GO:0005576,extracellular region; GO:0004180,carboxypeptidase activity; GO:0016747,transferase activity, transferring acyl groups other than amino-acyl groups; GO:0019748,secondary metabolic process
Capana09g000536	1518.11	4602.8	1.59936	2.28452e-60	up	--
Capana00g003487	142.91	1126.74	2.97885	2.31217e-60	up	--
Capana08g002729	3666.62	7976.62	1.12137	3.15865e-60	up	GO:0009507,chloroplast; GO:0009941,chloroplast envelope; GO:0046861,glyoxysomal membrane; GO:0016021,integral component of membrane; GO:0005739,mitochondrion; GO:0005778,peroxisomal membrane; GO:0005777,peroxisome; GO:0009506,plasmodesma; GO:0009536,plastid; GO:0005774,vacuolar membrane; GO:0005773,vacuole; GO:0004130,cytochrome-c peroxidase activity; GO:0020037,heme binding; GO:0016688,L-ascorba…
Capana01g000273	195.132	2352.92	3.58977	3.88035e-60	up	GO:0005634,nucleus; GO:0003700,DNA binding transcription factor activity; GO:0043565,sequence-specific DNA binding; GO:0045892,negative regulation of transcription, DNA-templated; GO:0010200,response to chitin; GO:0006351,transcription, DNA-templated
Capana12g000051	69.3256	848.75	3.60574	1.0326e-59	up	--
Capana08g000954	258.409	1394.33	2.4347	1.21827e-59	up	GO:0016021,integral component of membrane; GO:0005886,plasma membrane; GO:0000293,ferric-chelate reductase activity; GO:0046872,metal ion binding; GO:0006811,ion transport; GO:0015688,iron chelate transport; GO:0055072,iron ion homeostasis; GO:0009617,response to bacterium
Capana00g002494	777.571	2295.67	1.56138	1.28609e-59	up	--
Capana03g003997	1367.9	4317.82	1.65894	1.42956e-59	up	GO:0009507,chloroplast; GO:0010287,plastoglobule; GO:0005524,ATP binding; GO:0004672,protein kinase activity
Capana02g002465	72.514	1865.14	4.6867	2.10487e-59	up	GO:0005829,cytosol; GO:0009001,serine O-acetyltransferase activity; GO:0019344,cysteine biosynthetic process; GO:0006535,cysteine biosynthetic process from serine; GO:0000103,sulfate assimilation
Capana11g000349	609.259	3697.57	2.60295	2.18646e-59	up	--
Capana06g000573	4579.03	15448.9	1.75475	2.82025e-59	up	--
Capana03g001233	2196.83	6290.1	1.51806	3.60589e-59	up	GO:0009507,chloroplast; GO:0005525,GTP binding; GO:0003924,GTPase activity; GO:0003746,translation elongation factor activity
Capana03g000253	573.266	4139.14	2.85052	3.69434e-59	up	GO:0009507,chloroplast; GO:0009941,chloroplast envelope; GO:0016021,integral component of membrane; GO:0016020,membrane; GO:0005739,mitochondrion; GO:0005886,plasma membrane; GO:0005774,vacuolar membrane; GO:0005524,ATP binding; GO:0042626,ATPase activity, coupled to transmembrane movement of substances; GO:0015086,cadmium ion transmembrane transporter activity; GO:0015691,cadmium ion transport; …
Capana12g002757	24.2219	501.08	4.38747	6.13665e-59	up	GO:0102311,8-hydroxygeraniol dehydrogenase activity; GO:0008270,zinc ion binding
Capana11g001225	1661.7	4392.23	1.40244	8.29905e-59	up	GO:0005829,cytosol; GO:0051537,2 iron, 2 sulfur cluster binding; GO:0004031,aldehyde oxidase activity; GO:0009055,electron transfer activity; GO:0050660,flavin adenine dinucleotide binding; GO:0050302,indole-3-acetaldehyde oxidase activity; GO:0005506,iron ion binding; GO:0016614,oxidoreductase activity, acting on CH-OH group of donors; GO:0009688,abscisic acid biosynthetic process; GO:0009851,au…
Capana00g003603	528.232	2323.77	2.13651	1.41263e-58	up	--
Capana05g000126	2153.74	14432.4	2.7449	1.47787e-57	up	GO:0009507,chloroplast; GO:0009706,chloroplast inner membrane; GO:0009570,chloroplast stroma; GO:0010007,magnesium chelatase complex; GO:0005739,mitochondrion; GO:0005524,ATP binding; GO:0016851,magnesium chelatase activity; GO:0015995,chlorophyll biosynthetic process; GO:0015979,photosynthesis
Capana07g001111	321.997	1341.09	2.06165	2.14596e-57	up	GO:0005829,cytosol; GO:0003872,6-phosphofructokinase activity; GO:0005524,ATP binding; GO:0046872,metal ion binding; GO:0006002,fructose 6-phosphate metabolic process; GO:0006096,glycolytic process; GO:0010053,root epidermal cell differentiation
Capana11g002135	20.1975	477.018	4.57766	2.40789e-57	up	GO:0004842,ubiquitin-protein transferase activity
Capana04g000317	72.7628	686.337	3.22843	2.42155e-57	up	GO:0030686,90S preribosome; GO:0005730,nucleolus; GO:0005524,ATP binding; GO:1990883,rRNA cytidine N-acetyltransferase activity; GO:0000049,tRNA binding; GO:0051392,tRNA N-acetyltransferase activity; GO:1904812,rRNA acetylation involved in maturation of SSU-rRNA; GO:0051391,tRNA acetylation; GO:0002101,tRNA wobble cytosine modification
Capana01g003323	10892.8	23942.7	1.13638	2.95793e-57	up	GO:0030246,carbohydrate binding
Capana01g002820	1.34964	4094.48	11.7309	3.05974e-57	up	GO:0005737,cytoplasm; GO:0047216,inositol 3-alpha-galactosyltransferase activity; GO:0046872,metal ion binding; GO:0006012,galactose metabolic process; GO:0009737,response to abscisic acid; GO:0009409,response to cold; GO:0009408,response to heat; GO:0009644,response to high light intensity; GO:0042542,response to hydrogen peroxide; GO:0006979,response to oxidative stress; GO:0009651,response to …
Capana02g001313	20.4654	513	4.64992	5.33836e-57	up	--
Capana05g001302	49.2121	788.41	4.01578	6.66339e-57	up	--
Capana02g001802	175.328	2297.89	3.70552	1.57653e-56	up	GO:0005794,Golgi apparatus; GO:0016021,integral component of membrane; GO:0016413,O-acetyltransferase activity; GO:0071554,cell wall organization or biogenesis
Capana04g000005	194.841	1024.33	2.39036	1.63666e-56	up	GO:0016020,membrane; GO:0016846,carbon-sulfur lyase activity; GO:0030170,pyridoxal phosphate binding; GO:0080108,S-alkylthiohydroximate lyase activity; GO:0008483,transaminase activity; GO:0048830,adventitious root development; GO:0006520,cellular amino acid metabolic process; GO:0019761,glucosinolate biosynthetic process; GO:0009684,indoleacetic acid biosynthetic process; GO:0001560,regulation o…
Capana05g002051	2082.54	7079.4	1.7653	5.50201e-56	up	GO:0009507,chloroplast; GO:0008199,ferric iron binding; GO:0004322,ferroxidase activity; GO:0006879,cellular iron ion homeostasis; GO:0006826,iron ion transport
Capana11g000962	759.914	3358.88	2.14235	6.55233e-56	up	GO:0009507,chloroplast; GO:0009535,chloroplast thylakoid membrane; GO:0042651,thylakoid membrane; GO:0005524,ATP binding; GO:0004672,protein kinase activity; GO:0004674,protein serine/threonine kinase activity; GO:0007623,circadian rhythm; GO:0009643,photosynthetic acclimation; GO:0042548,regulation of photosynthesis, light reaction
Capana01g003981	664.665	3482.08	2.39109	7.48376e-56	up	GO:0009507,chloroplast; GO:0004602,glutathione peroxidase activity; GO:0080167,response to karrikin; GO:0006979,response to oxidative stress
Capana03g001535	10.3438	1495	7.23098	8.5804e-56	up	GO:0005634,nucleus; GO:0003700,DNA binding transcription factor activity; GO:0046983,protein dimerization activity; GO:0000977,RNA polymerase II regulatory region sequence-specific DNA binding; GO:0009960,endosperm development; GO:0045944,positive regulation of transcription by RNA polymerase II; GO:2000012,regulation of auxin polar transport; GO:0006351,transcription, DNA-templated
Capana03g003658	44.5082	876.516	4.2921	9.44387e-56	up	--
Capana00g003194	3349.31	16164.1	2.27126	9.65732e-56	up	--
Capana03g004557	274.803	1336.91	2.28475	1.16683e-55	up	GO:0016021,integral component of membrane; GO:0004605,phosphatidate cytidylyltransferase activity; GO:0016024,CDP-diacylglycerol biosynthetic process
Capana01g001770	1027.78	3101.43	1.59404	1.40916e-55	up	--
Capana11g000872	1660.61	11006.4	2.72833	1.56475e-55	up	GO:0005783,endoplasmic reticulum; GO:0005811,lipid droplet; GO:0005773,vacuole; GO:0080186,developmental vegetative growth; GO:0034389,lipid particle organization; GO:0009555,pollen development; GO:0045927,positive regulation of growth; GO:1902584,positive regulation of response to water deprivation
Capana04g000448	51.9973	775.733	3.89945	1.65963e-55	up	GO:0005886,plasma membrane; GO:0034485,phosphatidylinositol-3,4,5-trisphosphate 5-phosphatase activity; GO:0043813,phosphatidylinositol-3,5-bisphosphate 5-phosphatase activity; GO:0004439,phosphatidylinositol-4,5-bisphosphate 5-phosphatase activity; GO:0046856,phosphatidylinositol dephosphorylation; GO:0009737,response to abscisic acid; GO:0009733,response to auxin; GO:0009753,response to jasmoni…
Capana02g000416	322.29	1174.06	1.8644	5.40724e-55	up	--
Capana03g004428	58.6117	1572.82	4.73799	6.04939e-55	up	GO:0031969,chloroplast membrane; GO:0016021,integral component of membrane
Capana12g001147	4009.45	22276.2	2.47433	8.9856e-55	up	GO:0005618,cell wall; GO:0009941,chloroplast envelope; GO:0009570,chloroplast stroma; GO:0005856,cytoskeleton; GO:0005829,cytosol; GO:0005739,mitochondrion; GO:0005730,nucleolus; GO:0005886,plasma membrane; GO:0009506,plasmodesma; GO:0005524,ATP binding; GO:0005200,structural constituent of cytoskeleton; GO:0051301,cell division; GO:0009733,response to auxin; GO:0009416,response to light stimulus…
Capana07g000672	596.628	3263.35	2.44996	9.51912e-55	up	GO:0043231,intracellular membrane-bounded organelle; GO:0005524,ATP binding; GO:0004519,endonuclease activity; GO:0004672,protein kinase activity; GO:0003723,RNA binding; GO:0009451,RNA modification
Capana07g000330	22.8004	2750.6	6.92418	1.0928e-54	up	--
Capana09g000884	1795.91	5711.49	1.66974	1.11224e-54	up	GO:0005829,cytosol; GO:0004411,homogentisate 1,2-dioxygenase activity; GO:0046872,metal ion binding; GO:1902000,homogentisate catabolic process; GO:0006559,L-phenylalanine catabolic process; GO:0006572,tyrosine catabolic process
Capana07g000851	40.6891	743.863	4.17979	1.15691e-54	up	GO:0016021,integral component of membrane; GO:0005886,plasma membrane; GO:0005524,ATP binding; GO:0004674,protein serine/threonine kinase activity
Capana05g002486	149.064	1143.06	2.93313	1.27097e-54	up	GO:0043231,intracellular membrane-bounded organelle; GO:0080043,quercetin 3-O-glucosyltransferase activity; GO:0080044,quercetin 7-O-glucosyltransferase activity; GO:0008152,metabolic process
Capana07g002464	149.34	1433.75	3.25637	1.41011e-54	up	GO:0016021,integral component of membrane; GO:0005886,plasma membrane; GO:0005524,ATP binding; GO:0004674,protein serine/threonine kinase activity
Capana00g004290	296.569	1217.55	2.03621	1.52134e-54	up	--
Capana04g000577	14.8556	573.679	5.22749	1.79979e-54	up	GO:0005634,nucleus; GO:0003677,DNA binding; GO:0003700,DNA binding transcription factor activity; GO:0009873,ethylene-activated signaling pathway; GO:0006351,transcription, DNA-templated
Capana08g002441	493.587	1841.42	1.90211	1.94096e-54	up	GO:0005737,cytoplasm; GO:0005829,cytosol; GO:0005634,nucleus; GO:0005524,ATP binding; GO:0009931,calcium-dependent protein serine/threonine kinase activity; GO:0042802,identical protein binding; GO:0016301,kinase activity; GO:0004672,protein kinase activity; GO:0019903,protein phosphatase binding; GO:0004674,protein serine/threonine kinase activity; GO:0009738,abscisic acid-activated signaling pa…
Capana07g000557	13.0845	496.887	5.25808	2.91243e-54	up	GO:0016021,integral component of membrane; GO:0020037,heme binding; GO:0005506,iron ion binding; GO:0004497,monooxygenase activity; GO:0016705,oxidoreductase activity, acting on paired donors, with incorporation or reduction of molecular oxygen
Capana01g003548	305.021	4144.99	3.76058	4.35415e-54	up	GO:0005634,nucleus; GO:0009506,plasmodesma; GO:0003677,DNA binding; GO:0003700,DNA binding transcription factor activity; GO:0046983,protein dimerization activity; GO:0009567,double fertilization forming a zygote and endosperm; GO:0006355,regulation of transcription, DNA-templated; GO:0006351,transcription, DNA-templated
Capana03g004144	12.3485	595.042	5.55146	4.45605e-54	up	GO:0005783,endoplasmic reticulum; GO:0016021,integral component of membrane; GO:0031090,organelle membrane; GO:0020037,heme binding; GO:0005506,iron ion binding; GO:0004497,monooxygenase activity; GO:0016705,oxidoreductase activity, acting on paired donors, with incorporation or reduction of molecular oxygen
Capana07g000294	358.814	1661.07	2.20908	4.67481e-54	up	--
Capana02g002452	549.928	3970.82	2.85309	5.66148e-54	up	GO:0005739,mitochondrion; GO:0005777,peroxisome; GO:0004096,catalase activity; GO:0020037,heme binding; GO:0046872,metal ion binding; GO:0042744,hydrogen peroxide catabolic process; GO:0042542,response to hydrogen peroxide
Capana12g000742	5044.55	26368	2.38607	6.32566e-54	up	GO:0005615,extracellular space; GO:0005764,lysosome; GO:0004197,cysteine-type endopeptidase activity; GO:0051603,proteolysis involved in cellular protein catabolic process
Capana00g005021	132.84	960.033	2.85195	1.26157e-53	up	--
Capana03g004406	1067.98	3007.17	1.49454	1.45354e-53	up	GO:0009507,chloroplast; GO:0090415,7-hydroxymethyl chlorophyll a reductase activity; GO:0051536,iron-sulfur cluster binding; GO:0046872,metal ion binding; GO:0033354,chlorophyll cycle; GO:0015994,chlorophyll metabolic process
Capana10g002068	1089.94	5474.5	2.32874	1.76154e-53	up	GO:0009707,chloroplast outer membrane; GO:0043661,peribacteroid membrane; GO:0046481,digalactosyldiacylglycerol synthase activity; GO:0009877,nodulation
Capana02g002148	1525.34	5629.73	1.88513	1.8092e-53	up	GO:0005634,nucleus; GO:0003700,DNA binding transcription factor activity; GO:0046983,protein dimerization activity; GO:0043565,sequence-specific DNA binding; GO:0019760,glucosinolate metabolic process; GO:0006355,regulation of transcription, DNA-templated; GO:0006351,transcription, DNA-templated
Capana12g001312	2987.2	8676.3	1.53816	1.98595e-53	up	GO:0005618,cell wall; GO:0005829,cytosol; GO:0005634,nucleus; GO:0005886,plasma membrane; GO:0009506,plasmodesma; GO:0005524,ATP binding
Capana12g002115	4.31686	569.386	7.07389	2.00851e-53	up	--
Capana05g000005	294.129	2426.97	3.04927	2.33802e-53	up	GO:0009507,chloroplast; GO:0009941,chloroplast envelope; GO:0009706,chloroplast inner membrane; GO:0016021,integral component of membrane; GO:0009536,plastid; GO:0051537,2 iron, 2 sulfur cluster binding; GO:0010277,chlorophyllide a oxygenase [overall] activity; GO:0046872,metal ion binding; GO:0015031,protein transport
Capana03g001791	680.29	1880.55	1.46765	2.53481e-53	up	--
Capana09g002412	676.377	3366.79	2.31775	2.66851e-53	up	--
Capana01g000460	247.196	1158	2.23241	5.84757e-53	up	GO:0009507,chloroplast; GO:0009570,chloroplast stroma; GO:0005829,cytosol; GO:0016532,superoxide dismutase copper chaperone activity; GO:0008270,zinc ion binding; GO:0006878,cellular copper ion homeostasis; GO:0030001,metal ion transport; GO:0006801,superoxide metabolic process
Capana10g002143	15.9149	687.667	5.44892	2.1115e-52	up	GO:0016021,integral component of membrane; GO:0005886,plasma membrane; GO:0022857,transmembrane transporter activity
Capana08g001321	301.266	1263.91	2.07075	2.11812e-52	up	--
Capana08g000399	390.923	1540.57	1.98016	2.68077e-52	up	GO:0005829,cytosol; GO:0005779,integral component of peroxisomal membrane; GO:0005778,peroxisomal membrane; GO:0005777,peroxisome; GO:0004842,ubiquitin-protein transferase activity; GO:0008270,zinc ion binding; GO:0009793,embryo development ending in seed dormancy; GO:0006635,fatty acid beta-oxidation; GO:0007031,peroxisome organization; GO:0010381,peroxisome-chloroplast membrane tethering; GO:00…
Capana09g002162	12.4195	478.609	5.25309	3.37591e-52	up	GO:0009507,chloroplast; GO:0005887,integral component of plasma membrane; GO:0016020,membrane; GO:0005886,plasma membrane; GO:0009506,plasmodesma; GO:0005773,vacuole; GO:0003729,mRNA binding; GO:0031625,ubiquitin protein ligase binding; GO:0015250,water channel activity; GO:0080170,hydrogen peroxide transmembrane transport; GO:0034220,ion transmembrane transport; GO:0009737,response to abscisic a…
Capana12g001389	24.353	700.219	4.85553	3.76246e-52	up	--
Capana09g000733	383.33	1418.92	1.88646	4.10311e-52	up	GO:0046872,metal ion binding
Capana01g002764	462.409	7016.39	3.92142	7.52242e-52	up	--
Capana05g002463	371.66	1232.98	1.72886	8.01677e-52	up	--
Capana10g000025	56.2889	902.515	3.98681	1.00838e-51	up	GO:0005794,Golgi apparatus; GO:0000139,Golgi membrane; GO:0016021,integral component of membrane; GO:0047262,polygalacturonate 4-alpha-galacturonosyltransferase activity; GO:0071555,cell wall organization; GO:0010417,glucuronoxylan biosynthetic process; GO:0010413,glucuronoxylan metabolic process; GO:0045489,pectin biosynthetic process; GO:0045492,xylan biosynthetic process
Capana12g000555	875.119	7135.32	3.02903	1.09282e-51	up	GO:0048046,apoplast; GO:0009507,chloroplast; GO:0009941,chloroplast envelope; GO:0031969,chloroplast membrane; GO:0009570,chloroplast stroma; GO:0009535,chloroplast thylakoid membrane; GO:0016020,membrane; GO:0010319,stromule; GO:0004365,glyceraldehyde-3-phosphate dehydrogenase (NAD+) (phosphorylating) activity; GO:0047100,glyceraldehyde-3-phosphate dehydrogenase (NADP+) (phosphorylating) activit…
Capana07g000146	940.352	3665.77	1.96203	1.09987e-51	up	GO:0005618,cell wall; GO:0009507,chloroplast; GO:0043022,ribosome binding; GO:0003743,translation initiation factor activity; GO:0032790,ribosome disassembly
Capana05g002411	73.7437	3163.21	5.41022	1.30924e-51	up	GO:0016021,integral component of membrane; GO:0005886,plasma membrane; GO:0005516,calmodulin binding; GO:0009817,defense response to fungus, incompatible interaction
Capana02g001498	119.677	917.513	2.94244	1.34402e-51	up	GO:0009507,chloroplast; GO:0009570,chloroplast stroma; GO:0047538,2-carboxy-D-arabinitol-1-phosphatase activity
Capana10g001494	866.757	2766.39	1.67579	1.51796e-51	up	--
Capana01g003662	1353.09	3908.71	1.53103	2.02325e-51	up	GO:0048046,apoplast; GO:0009507,chloroplast; GO:0009570,chloroplast stroma; GO:0010319,stromule; GO:0004601,peroxidase activity; GO:0051920,peroxiredoxin activity; GO:0045454,cell redox homeostasis; GO:0042742,defense response to bacterium; GO:0009409,response to cold
Capana08g000421	1223	4021.1	1.71611	2.14779e-51	up	GO:0005634,nucleus; GO:0003677,DNA binding; GO:0003700,DNA binding transcription factor activity; GO:0004601,peroxidase activity; GO:0009738,abscisic acid-activated signaling pathway; GO:0006952,defense response; GO:0042742,defense response to bacterium; GO:0050832,defense response to fungus; GO:0002229,defense response to oomycetes; GO:0009682,induced systemic resistance; GO:0009867,jasmonic aci…
Capana00g002392	401.431	2544.36	2.6624	2.3714e-51	up	--
Capana02g000109	760.107	2322.12	1.60957	2.5853e-51	up	--
Capana07g001024	2753.15	6286.12	1.19101	2.70355e-51	up	GO:0005618,cell wall; GO:0005739,mitochondrion; GO:0005730,nucleolus; GO:0043234,NA; GO:0005524,ATP binding; GO:0004004,ATP-dependent RNA helicase activity; GO:0003723,RNA binding; GO:0000373,Group II intron splicing; GO:0009409,response to cold; GO:0010501,RNA secondary structure unwinding
Capana00g000558	2.34521	758.903	8.30419	3.1836e-51	up	--
Capana09g001461	1255	8417.9	2.74656	3.35967e-51	up	GO:0080008,Cul4-RING E3 ubiquitin ligase complex
Capana11g001221	2438.99	9658.21	1.98493	8.57703e-51	up	GO:0009507,chloroplast; GO:0009570,chloroplast stroma; GO:0005777,peroxisome; GO:0008453,alanine-glyoxylate transaminase activity; GO:0047958,glycine:2-oxoglutarate aminotransferase activity; GO:0004021,L-alanine:2-oxoglutarate aminotransferase activity; GO:0030170,pyridoxal phosphate binding; GO:0009058,biosynthetic process; GO:0042853,L-alanine catabolic process
Capana06g001285	3097.92	9303.71	1.58709	1.74462e-50	up	GO:0016021,integral component of membrane; GO:0005743,mitochondrial inner membrane; GO:0070469,respiratory chain; GO:0009055,electron transfer activity; GO:0020037,heme binding; GO:0046872,metal ion binding
Capana00g000744	398.443	2237.25	2.48778	2.21572e-50	up	--
Capana08g001283	72.9757	854.064	3.55147	2.67888e-50	up	--
Capana08g001163	6854.51	29568.1	2.10913	4.38308e-50	up	GO:0005634,nucleus; GO:0003676,nucleic acid binding; GO:0008270,zinc ion binding
Capana09g000410	3.48403	669.407	7.44775	6.93581e-50	up	GO:0016866,intramolecular transferase activity
Capana07g001881	90.5832	14727.2	7.34032	9.15709e-50	up	GO:0016021,integral component of membrane; GO:0020037,heme binding; GO:0005506,iron ion binding; GO:0004497,monooxygenase activity; GO:0016705,oxidoreductase activity, acting on paired donors, with incorporation or reduction of molecular oxygen
Capana07g001755	731.322	2123.94	1.53814	1.16849e-49	up	GO:0016020,membrane; GO:0005524,ATP binding; GO:0031072,heat shock protein binding; GO:0046872,metal ion binding; GO:0051082,unfolded protein binding; GO:0006457,protein folding; GO:0009408,response to heat
Capana00g000926	124.837	894.379	2.84448	1.38641e-49	up	--
Capana06g000927	10.4723	940.68	6.48637	2.14585e-49	up	--
Capana03g002775	89.9291	755.521	3.07167	2.35116e-49	up	GO:0005789,endoplasmic reticulum membrane; GO:0016021,integral component of membrane; GO:0020037,heme binding; GO:0005506,iron ion binding; GO:0004497,monooxygenase activity; GO:0016705,oxidoreductase activity, acting on paired donors, with incorporation or reduction of molecular oxygen
Capana03g002720	823.603	2730.68	1.72971	3.04588e-49	up	GO:0005737,cytoplasm; GO:0005096,GTPase activator activity; GO:0043087,regulation of GTPase activity; GO:0007165,signal transduction
Capana06g000525	1044	3376.6	1.69294	3.84509e-49	up	GO:0009507,chloroplast; GO:0005829,cytosol; GO:0046872,metal ion binding; GO:0000210,NAD+ diphosphatase activity
Capana03g000944	345.577	1742.12	2.33098	4.48473e-49	up	GO:0000775,chromosome, centromeric region; GO:0000818,nuclear MIS12/MIND complex; GO:0005634,nucleus; GO:0051301,cell division; GO:0051382,kinetochore assembly; GO:0051321,meiotic cell cycle; GO:0000070,mitotic sister chromatid segregation; GO:0034501,protein localization to kinetochore
Capana08g001978	391.861	2975.44	2.92429	4.5935e-49	up	GO:0005634,nucleus; GO:0003677,DNA binding; GO:0003700,DNA binding transcription factor activity; GO:0043565,sequence-specific DNA binding; GO:0006351,transcription, DNA-templated
Capana08g001075	1390.81	9167.18	2.72143	4.84622e-49	up	--
Capana09g000398	1536.91	5421.92	1.81834	5.04938e-49	up	GO:0005730,nucleolus; GO:0030687,preribosome, large subunit precursor; GO:0000447,endonucleolytic cleavage in ITS1 to separate SSU-rRNA from 5.8S rRNA and LSU-rRNA from tricistronic rRNA transcript (SSU-rRNA, 5.8S rRNA, LSU-rRNA); GO:0042273,ribosomal large subunit biogenesis; GO:0000055,ribosomal large subunit export from nucleus
Capana00g003817	188.131	1894.29	3.32576	6.18417e-49	up	--
Capana11g001019	307.046	1216.47	1.98398	6.55763e-49	up	--
Capana05g002179	340.341	1674.07	2.29961	6.72931e-49	up	GO:0005783,endoplasmic reticulum; GO:0016020,membrane; GO:0004029,aldehyde dehydrogenase (NAD) activity; GO:0004030,aldehyde dehydrogenase [NAD(P)+] activity; GO:0006081,cellular aldehyde metabolic process
Capana12g002747	55.3493	538.76	3.2866	6.89968e-49	up	GO:0005783,endoplasmic reticulum; GO:0005794,Golgi apparatus; GO:0016021,integral component of membrane; GO:0009737,response to abscisic acid; GO:0006950,response to stress
Capana03g003147	2029.59	5536.22	1.4481	8.68613e-49	up	--
Capana10g001630	633.94	2967.28	2.22706	1.4307e-48	up	--
Capana01g003637	848.421	2395.73	1.49878	1.70037e-48	up	GO:0009707,chloroplast outer membrane; GO:0043661,peribacteroid membrane; GO:0046481,digalactosyldiacylglycerol synthase activity; GO:0009877,nodulation
Capana09g001925	26.8194	720.095	4.74725	1.7033e-48	up	GO:0016021,integral component of membrane; GO:0005886,plasma membrane; GO:0015171,amino acid transmembrane transporter activity; GO:0032973,amino acid export across plasma membrane; GO:0080144,amino acid homeostasis; GO:0043090,amino acid import
Capana11g000871	888.944	4092.53	2.20227	2.18127e-48	up	GO:0009507,chloroplast; GO:0009570,chloroplast stroma; GO:0031071,cysteine desulfurase activity; GO:0030170,pyridoxal phosphate binding; GO:0009000,selenocysteine lyase activity; GO:0006534,cysteine metabolic process; GO:0018283,iron incorporation into metallo-sulfur cluster; GO:0010269,response to selenium ion; GO:0001887,selenium compound metabolic process; GO:0006790,sulfur compound metabolic …
Capana02g001040	32.3492	1204.14	5.19293	3.52215e-48	up	--
Capana10g000124	4147.18	8991.85	1.11692	3.60663e-48	up	GO:0005737,cytoplasm; GO:0005634,nucleus; GO:0005524,ATP binding; GO:0004707,MAP kinase activity; GO:0010468,regulation of gene expression
Capana07g002411	20383.8	123991	2.60479	5.1114e-48	up	GO:0005737,cytoplasm; GO:0005524,ATP binding; GO:0051082,unfolded protein binding; GO:0006457,protein folding; GO:0006950,response to stress
Capana12g002700	1144.7	3204.98	1.48452	5.75279e-48	up	GO:0019904,protein domain specific binding
Capana04g000859	30.9778	835.746	4.75215	6.55542e-48	up	GO:0005634,nucleus; GO:0003700,DNA binding transcription factor activity; GO:0046983,protein dimerization activity; GO:0000977,RNA polymerase II regulatory region sequence-specific DNA binding; GO:0043565,sequence-specific DNA binding; GO:0000900,translation repressor activity, mRNA regulatory element binding; GO:0030154,cell differentiation; GO:0048438,floral whorl development; GO:0009910,negati…
Capana04g000040	2318.8	5193.89	1.16309	6.96123e-48	up	GO:0050662,coenzyme binding; GO:0016491,oxidoreductase activity; GO:0009813,flavonoid biosynthetic process
Capana01g000053	395.301	2272.55	2.52369	7.86314e-48	up	GO:0016021,integral component of membrane; GO:0005886,plasma membrane; GO:0003006,developmental process involved in reproduction; GO:0006811,ion transport; GO:0055072,iron ion homeostasis; GO:0010039,response to iron ion; GO:0048316,seed development; GO:0055085,transmembrane transport
Capana11g000817	1766.45	6997.28	1.98669	1.13924e-47	up	GO:0009535,chloroplast thylakoid membrane; GO:0016021,integral component of membrane; GO:0051205,protein insertion into membrane
Capana03g003720	585.77	4815.47	3.03979	1.17417e-47	up	GO:0005524,ATP binding; GO:0009408,response to heat; GO:0009644,response to high light intensity; GO:0042542,response to hydrogen peroxide
Capana02g000894	22.4932	475.671	4.39909	1.27801e-47	up	--
Capana10g002168	657.422	3143.97	2.25604	1.80499e-47	up	GO:0005634,nucleus; GO:0003700,DNA binding transcription factor activity; GO:0043565,sequence-specific DNA binding; GO:0006351,transcription, DNA-templated
Capana10g002258	3429.11	12448.3	1.8604	2.42642e-47	up	GO:0005737,cytoplasm; GO:0009617,response to bacterium; GO:0009644,response to high light intensity; GO:0009414,response to water deprivation
Capana03g001695	838.622	2380.31	1.50637	2.62771e-47	up	GO:0009507,chloroplast; GO:0005739,mitochondrion
Capana02g000476	14.0223	1200.98	6.37677	2.725e-47	up	GO:0046872,metal ion binding; GO:0008168,methyltransferase activity
Capana01g001375	184.27	1041.88	2.50387	3.02418e-47	up	--
Capana11g001559	692.643	2656.52	1.93948	3.08655e-47	up	GO:0005737,cytoplasm; GO:0005524,ATP binding; GO:0004672,protein kinase activity; GO:0004674,protein serine/threonine kinase activity; GO:0004871,signal transducer activity; GO:0035556,intracellular signal transduction
Capana02g002174	2156.45	6202.16	1.52409	3.11376e-47	up	GO:0016021,integral component of membrane; GO:0009705,plant-type vacuole membrane; GO:0046786,viral replication complex formation and maintenance
Capana11g000601	57.5679	2756.89	5.56949	3.78172e-47	up	GO:0005759,mitochondrial matrix; GO:0004739,pyruvate dehydrogenase (acetyl-transferring) activity; GO:0006086,acetyl-CoA biosynthetic process from pyruvate; GO:0006096,glycolytic process
Capana03g001760	359.075	1620.67	2.17622	3.86202e-47	up	--
Capana01g003035	51.2839	537.917	3.40075	4.74958e-47	up	--
Capana00g004823	621.717	1636.34	1.39612	5.65447e-47	up	--
Capana12g002816	16.5398	508.433	4.956	8.90776e-47	up	--
Capana12g002818	231.685	1769.71	2.9326	1.04075e-46	up	GO:0080008,Cul4-RING E3 ubiquitin ligase complex; GO:0005737,cytoplasm; GO:0016604,nuclear body; GO:0000152,nuclear ubiquitin ligase complex; GO:0005634,nucleus; GO:0042802,identical protein binding; GO:0046872,metal ion binding; GO:0061630,ubiquitin protein ligase activity; GO:0004842,ubiquitin-protein transferase activity; GO:0046283,anthocyanin-containing compound metabolic process; GO:0006281…
Capana03g001986	536.61	1891.94	1.81877	1.13101e-46	up	--
Capana11g000658	1256.65	3056.59	1.28326	1.66231e-46	up	--
Capana09g002101	7.31831	358.447	5.63117	2.27134e-46	up	GO:0016021,integral component of membrane; GO:0005743,mitochondrial inner membrane
Capana06g001870	2095.12	8588.11	2.03489	3.08676e-46	up	GO:0009507,chloroplast; GO:0031177,phosphopantetheine binding; GO:0006633,fatty acid biosynthetic process
Capana12g002385	533.714	1871.73	1.81024	3.26049e-46	up	GO:0005783,endoplasmic reticulum; GO:0030176,integral component of endoplasmic reticulum membrane; GO:0005886,plasma membrane; GO:0005096,GTPase activator activity; GO:0051020,GTPase binding; GO:0005090,Sar guanyl-nucleotide exchange factor activity; GO:0016036,cellular response to phosphate starvation; GO:0006888,ER to Golgi vesicle-mediated transport; GO:0006817,phosphate ion transport; GO:0009…
Capana00g000736	221.869	975.685	2.13858	4.84341e-46	up	--
Capana05g001151	463.169	1516.01	1.70998	5.11372e-46	up	GO:0000785,chromatin; GO:0005634,nucleus; GO:0051213,dioxygenase activity; GO:0032454,histone demethylase activity (H3-K9 specific); GO:0046872,metal ion binding; GO:0000976,transcription regulatory region sequence-specific DNA binding; GO:0060969,negative regulation of gene silencing; GO:0006355,regulation of transcription, DNA-templated; GO:0006351,transcription, DNA-templated
Capana08g001382	59.7432	626.918	3.38042	9.77244e-46	up	GO:0016021,integral component of membrane; GO:0005886,plasma membrane; GO:0005775,vacuolar lumen; GO:0005524,ATP binding; GO:0016301,kinase activity; GO:0004674,protein serine/threonine kinase activity; GO:0009877,nodulation; GO:0046777,protein autophosphorylation; GO:0009609,response to symbiotic bacterium
Capana04g002168	499.204	2046.03	2.03534	1.16655e-45	up	GO:0009507,chloroplast; GO:0005743,mitochondrial inner membrane; GO:0005739,mitochondrion; GO:0010287,plastoglobule; GO:0016491,oxidoreductase activity; GO:0019646,aerobic electron transport chain; GO:0071482,cellular response to light stimulus; GO:0055114,oxidation-reduction process
Capana10g002214	973.621	3225.58	1.72954	1.7814e-45	up	GO:0009507,chloroplast; GO:0009570,chloroplast stroma; GO:0008047,enzyme activator activity; GO:0042802,identical protein binding; GO:0016671,oxidoreductase activity, acting on a sulfur group of donors, disulfide as acceptor; GO:0004791,thioredoxin-disulfide reductase activity; GO:0045454,cell redox homeostasis; GO:0042744,hydrogen peroxide catabolic process; GO:0043085,positive regulation of cat…
Capana07g000915	159.974	1067.53	2.74543	2.35836e-45	up	GO:0005887,integral component of plasma membrane; GO:0015250,water channel activity; GO:0034220,ion transmembrane transport
Capana11g002192	134.373	1064.09	2.97757	2.40647e-45	up	--
Capana09g002427	2678.36	8288.95	1.63036	2.79141e-45	up	GO:0009507,chloroplast; GO:0009570,chloroplast stroma; GO:0043234,NA; GO:0080085,signal recognition particle, chloroplast targeting; GO:0005786,signal recognition particle, endoplasmic reticulum targeting; GO:0008312,7S RNA binding; GO:0005525,GTP binding; GO:0003924,GTPase activity; GO:0019904,protein domain specific binding; GO:0070208,protein heterotrimerization; GO:0006614,SRP-dependent cotra…
Capana04g000765	756.977	3387.1	2.16246	2.87788e-45	up	GO:0005737,cytoplasm; GO:0005634,nucleus; GO:0005524,ATP binding; GO:0047325,inositol tetrakisphosphate 1-kinase activity; GO:0052726,inositol-1,3,4-trisphosphate 5-kinase activity; GO:0052725,inositol-1,3,4-trisphosphate 6-kinase activity; GO:0000287,magnesium ion binding; GO:0032957,inositol trisphosphate metabolic process; GO:0009611,response to wounding
Capana02g002266	16.1976	812.186	5.67297	3.95768e-45	up	GO:0005634,nucleus; GO:0003677,DNA binding; GO:0003700,DNA binding transcription factor activity; GO:0009851,auxin biosynthetic process; GO:0009734,auxin-activated signaling pathway; GO:0007623,circadian rhythm; GO:0010600,regulation of auxin biosynthetic process; GO:0006355,regulation of transcription, DNA-templated; GO:0006351,transcription, DNA-templated
Capana07g001999	523.466	1655.12	1.66204	4.77817e-45	up	GO:0005634,nucleus; GO:0010030,positive regulation of seed germination; GO:0045893,positive regulation of transcription, DNA-templated; GO:0006351,transcription, DNA-templated
Capana03g003603	107.251	703.413	2.72102	5.72485e-45	up	--
Capana06g002488	1050.17	3199.13	1.60626	6.79502e-45	up	--
Capana00g001488	293.055	1114.28	1.92489	1.02368e-44	up	--
Capana04g002064	655.184	1919.49	1.55203	1.03875e-44	up	GO:0010283,pinoresinol reductase activity
Capana07g001274	460.027	1662.32	1.85387	1.12266e-44	up	--
Capana04g000194	86.121	798.519	3.21913	1.24961e-44	up	GO:0005829,cytosol; GO:0005634,nucleus; GO:0016787,hydrolase activity; GO:0009691,cytokinin biosynthetic process
Capana10g002175	208.112	1081.54	2.38289	1.45168e-44	up	GO:0009507,chloroplast; GO:0031969,chloroplast membrane; GO:0009570,chloroplast stroma; GO:0016671,oxidoreductase activity, acting on a sulfur group of donors, disulfide as acceptor; GO:0045454,cell redox homeostasis
Capana00g003111	6412.38	25926.1	2.01572	1.50145e-44	up	--
Capana08g001036	340.928	2505.26	2.87414	1.53712e-44	up	GO:0005773,vacuole; GO:0070566,adenylyltransferase activity; GO:0019899,enzyme binding; GO:0080123,jasmonate-amino synthetase activity; GO:0071365,cellular response to auxin stimulus; GO:0009864,induced systemic resistance, jasmonic acid mediated signaling pathway; GO:0009694,jasmonic acid metabolic process; GO:0031348,negative regulation of defense response; GO:0009640,photomorphogenesis; GO:000…
Capana03g003807	4.77156	411.677	6.35228	2.28092e-44	up	--
Capana08g001277	832.989	2790.49	1.7441	2.35262e-44	up	--
Capana03g000766	45.0226	554.609	3.60717	2.77338e-44	up	GO:0005634,nucleus; GO:0003677,DNA binding; GO:0006355,regulation of transcription, DNA-templated; GO:0006351,transcription, DNA-templated
Capana03g004410	180.686	1707.71	3.24615	2.96922e-44	up	GO:0048046,apoplast; GO:0009507,chloroplast; GO:0009941,chloroplast envelope; GO:0009570,chloroplast stroma; GO:0016020,membrane; GO:0005739,mitochondrion; GO:0009536,plastid; GO:0009532,plastid stroma; GO:0010319,stromule; GO:0005774,vacuolar membrane; GO:0030060,L-malate dehydrogenase activity; GO:0008746,NAD(P)+ transhydrogenase activity; GO:0005975,carbohydrate metabolic process; GO:0009793,e…
Capana11g000201	159.602	865.51	2.4375	4.23906e-44	up	GO:0009507,chloroplast; GO:0009941,chloroplast envelope; GO:0031969,chloroplast membrane; GO:0016021,integral component of membrane; GO:0015095,magnesium ion transmembrane transporter activity; GO:0010960,magnesium ion homeostasis; GO:1903830,magnesium ion transmembrane transport; GO:0010117,photoprotection; GO:0010027,thylakoid membrane organization
Capana12g001718	47.8244	952.478	4.32971	5.47046e-44	up	--
Capana05g000050	22.3505	337.485	3.90903	5.75296e-44	up	--
Capana05g002020	2072.13	6994.28	1.75593	6.53334e-44	up	GO:0009507,chloroplast; GO:0046872,metal ion binding; GO:0050278,sedoheptulose-bisphosphatase activity; GO:0019253,reductive pentose-phosphate cycle
Capana08g001895	3127.75	17213.8	2.4606	6.79151e-44	up	GO:0009507,chloroplast; GO:0051537,2 iron, 2 sulfur cluster binding; GO:0009055,electron transfer activity; GO:0046872,metal ion binding
Capana11g002255	601.096	2061.02	1.77983	7.4121e-44	up	GO:0005737,cytoplasm; GO:0016020,membrane; GO:0043531,ADP binding; GO:0005524,ATP binding; GO:0009626,plant-type hypersensitive response
Capana00g003406	745.337	2214.3	1.57072	7.96167e-44	up	--
Capana09g000175	37.675	527.625	3.79873	8.08081e-44	up	GO:0005622,intracellular; GO:0005524,ATP binding; GO:0016301,kinase activity; GO:0046872,metal ion binding; GO:0004674,protein serine/threonine kinase activity; GO:0035556,intracellular signal transduction; GO:0018105,peptidyl-serine phosphorylation
Capana12g002331	704.016	4547.56	2.69155	1.51827e-43	up	GO:0009507,chloroplast
Capana02g002100	1370.37	3790.38	1.46846	1.53863e-43	up	GO:0009507,chloroplast
Capana06g002351	14.5876	339.905	4.51505	1.63405e-43	up	GO:0016021,integral component of membrane; GO:0046872,metal ion binding; GO:0061630,ubiquitin protein ligase activity; GO:0043161,proteasome-mediated ubiquitin-dependent protein catabolic process
Capana03g001573	509.117	1666.98	1.70916	1.75761e-43	up	--
Capana08g002044	92.8206	570.553	2.62649	1.84304e-43	up	GO:0035251,UDP-glucosyltransferase activity; GO:1900994,(-)-secologanin biosynthetic process
Capana12g000777	16.0429	331.963	4.36137	2.84876e-43	up	GO:0005634,nucleus; GO:0004842,ubiquitin-protein transferase activity
Capana01g000410	1506.94	3527.1	1.22741	3.71933e-43	up	GO:0009507,chloroplast; GO:0009941,chloroplast envelope; GO:0009570,chloroplast stroma; GO:0009534,chloroplast thylakoid; GO:0009840,chloroplastic endopeptidase Clp complex; GO:0010287,plastoglobule; GO:0004252,serine-type endopeptidase activity; GO:0009658,chloroplast organization
Capana12g000249	303.39	1625.54	2.41848	3.90944e-43	up	--
Capana03g001416	566.16	2152.35	1.9292	5.05846e-43	up	GO:0016602,CCAAT-binding factor complex; GO:0005634,nucleus; GO:0003677,DNA binding; GO:0003700,DNA binding transcription factor activity; GO:0046982,protein heterodimerization activity; GO:2000306,positive regulation of photomorphogenesis; GO:0045893,positive regulation of transcription, DNA-templated; GO:0006355,regulation of transcription, DNA-templated; GO:0006351,transcription, DNA-templated
Capana05g001524	1816.39	4699.62	1.37105	5.23101e-43	up	GO:0005737,cytoplasm; GO:0003868,4-hydroxyphenylpyruvate dioxygenase activity; GO:0046872,metal ion binding; GO:0006559,L-phenylalanine catabolic process; GO:0006572,tyrosine catabolic process
Capana03g000629	5.54274	401.75	6.14884	5.65189e-43	up	GO:0005634,nucleus; GO:0003700,DNA binding transcription factor activity; GO:0043565,sequence-specific DNA binding; GO:0050832,defense response to fungus; GO:0009873,ethylene-activated signaling pathway; GO:0007275,multicellular organism development; GO:0006351,transcription, DNA-templated
Capana12g002265	250.857	871.022	1.79643	6.22141e-43	up	GO:0009507,chloroplast; GO:0003723,RNA binding; GO:1900871,chloroplast mRNA modification; GO:0006397,mRNA processing; GO:0009409,response to cold
Capana00g003542	16810.9	62632.9	1.89758	6.37928e-43	up	--
Capana07g001154	415.612	1714.28	2.04681	6.63776e-43	up	--
Capana02g000036	5.82878	389.991	6.02904	9.54449e-43	up	--
Capana00g003638	202.671	931.846	2.19773	1.45155e-42	up	--
Capana06g000702	4169.13	13051.2	1.64669	1.7194e-42	up	GO:0015030,Cajal body; GO:0030529,NA; GO:0005719,nuclear euchromatin; GO:0005730,nucleolus; GO:0005654,nucleoplasm; GO:0003682,chromatin binding; GO:0004521,endoribonuclease activity; GO:0035198,miRNA binding; GO:0035197,siRNA binding; GO:0006342,chromatin silencing; GO:0031048,chromatin silencing by small RNA; GO:0009816,defense response to bacterium, incompatible interaction; GO:0051607,defense…
Capana08g002691	11.2469	302.966	4.73583	3.7676e-42	up	GO:0048046,apoplast; GO:0016853,isomerase activity
Capana07g002128	1820.49	4126.77	1.17988	4.60383e-42	up	GO:0005737,cytoplasm; GO:0005634,nucleus; GO:0005524,ATP binding; GO:0061630,ubiquitin protein ligase activity; GO:0031625,ubiquitin protein ligase binding; GO:0004842,ubiquitin-protein transferase activity; GO:0006301,postreplication repair; GO:0070534,protein K63-linked ubiquitination; GO:0046686,response to cadmium ion; GO:0010039,response to iron ion; GO:0010053,root epidermal cell differenti…
Capana03g003642	788.617	3731.15	2.24261	4.91291e-42	up	--
Capana05g000748	189.104	1120.96	2.57246	6.18596e-42	up	GO:0009507,chloroplast; GO:0043231,intracellular membrane-bounded organelle; GO:0004519,endonuclease activity; GO:0003723,RNA binding; GO:0009658,chloroplast organization; GO:0009451,RNA modification
Capana03g000526	1521.56	4067.15	1.41932	6.90707e-42	up	--
Capana09g000936	93.7793	3258.29	5.11775	7.561e-42	up	GO:0005634,nucleus; GO:0003677,DNA binding; GO:0006355,regulation of transcription, DNA-templated; GO:0006351,transcription, DNA-templated
Capana06g000391	1118.82	2949.37	1.39707	8.94787e-42	up	--
Capana08g001085	4210.62	17666.5	2.06903	9.27433e-42	up	--
Capana03g004181	1702.53	4876.03	1.51868	1.2629e-41	up	GO:0016757,transferase activity, transferring glycosyl groups; GO:0007275,multicellular organism development; GO:0006493,protein O-linked glycosylation
Capana10g001446	4185.89	18678.8	2.15779	1.30874e-41	up	GO:0005524,ATP binding
Capana00g002483	969.514	2901.91	1.58138	1.39683e-41	up	--
Capana11g001600	1790.66	5439.21	1.60305	1.68396e-41	up	GO:0030176,integral component of endoplasmic reticulum membrane; GO:0030173,integral component of Golgi membrane; GO:0015297,antiporter activity; GO:0005459,UDP-galactose transmembrane transporter activity; GO:0005460,UDP-glucose transmembrane transporter activity; GO:0008643,carbohydrate transport; GO:0009553,embryo sac development; GO:0030968,endoplasmic reticulum unfolded protein response; GO:…
Capana00g000985	2395.03	6808.49	1.5075	2.26834e-41	up	--
Capana10g000809	759.453	2248.84	1.56447	3.25801e-41	up	GO:0009535,chloroplast thylakoid membrane; GO:0016021,integral component of membrane; GO:0009579,thylakoid; GO:0005315,inorganic phosphate transmembrane transporter activity; GO:0015293,symporter activity; GO:0009416,response to light stimulus; GO:0009624,response to nematode; GO:0006814,sodium ion transport
Capana05g002163	9.7637	380.977	5.24402	3.50795e-41	up	GO:0016021,integral component of membrane; GO:0005886,plasma membrane; GO:0022857,transmembrane transporter activity
Capana11g001622	440.926	3456.09	2.97064	5.3442e-41	up	--
Capana08g002820	41.7139	812.747	4.26445	6.0541e-41	up	GO:0050660,flavin adenine dinucleotide binding; GO:0004497,monooxygenase activity; GO:0004499,N,N-dimethylaniline monooxygenase activity; GO:0050661,NADP binding; GO:0071456,cellular response to hypoxia; GO:0009870,defense response signaling pathway, resistance gene-dependent; GO:0010204,defense response signaling pathway, resistance gene-independent; GO:0042742,defense response to bacterium; GO:…
Capana06g001097	441.994	1770.12	2.00344	6.63284e-41	up	--
Capana03g003579	436.146	1791.91	2.04053	6.677e-41	up	GO:0009507,chloroplast; GO:0003747,translation release factor activity; GO:0016149,translation release factor activity, codon specific; GO:0009658,chloroplast organization; GO:0032544,plastid translation; GO:0040008,regulation of growth; GO:0010027,thylakoid membrane organization; GO:0006415,translational termination
Capana06g001476	24.9312	1235.48	5.60181	6.97656e-41	up	GO:0016491,oxidoreductase activity
Capana07g002194	2166.52	7771.89	1.84352	1.39625e-40	up	GO:0005618,cell wall; GO:0009507,chloroplast; GO:0009941,chloroplast envelope; GO:0009570,chloroplast stroma; GO:0009535,chloroplast thylakoid membrane; GO:0009579,thylakoid; GO:0008047,enzyme activator activity; GO:0004857,enzyme inhibitor activity; GO:0016671,oxidoreductase activity, acting on a sulfur group of donors, disulfide as acceptor; GO:0015035,protein disulfide oxidoreductase activity;…
Capana07g000771	2823.95	9725.25	1.7846	1.88831e-40	up	--
Capana02g002230	69.5821	791.872	3.51138	2.04961e-40	up	GO:0005634,nucleus; GO:0003700,DNA binding transcription factor activity; GO:0043565,sequence-specific DNA binding; GO:0044212,transcription regulatory region DNA binding; GO:0080169,cellular response to boron-containing substance deprivation; GO:0016036,cellular response to phosphate starvation; GO:0009873,ethylene-activated signaling pathway; GO:0045892,negative regulation of transcription, DNA…
Capana02g002363	604.621	2277.89	1.91235	2.39418e-40	up	GO:0071013,catalytic step 2 spliceosome; GO:0005686,U2 snRNP; GO:0071004,U2-type prespliceosome; GO:0005684,U2-type spliceosomal complex; GO:0003723,RNA binding; GO:0000389,mRNA 3'-splice site recognition; GO:0000398,mRNA splicing, via spliceosome; GO:0000381,regulation of alternative mRNA splicing, via spliceosome
Capana02g002986	194.872	867.393	2.1542	3.35956e-40	up	--
Capana02g001858	1781.64	4351.7	1.28764	3.59821e-40	up	--
Capana01g001575	3.8005	595.932	7.3511	3.85568e-40	up	GO:0009570,chloroplast stroma; GO:0009534,chloroplast thylakoid; GO:0016165,linoleate 13S-lipoxygenase activity; GO:0046872,metal ion binding; GO:0010597,green leaf volatile biosynthetic process; GO:0031408,oxylipin biosynthetic process
Capana02g001999	253.387	921.627	1.86479	3.8885e-40	up	--
Capana05g002560	593.173	1886.55	1.66968	4.05396e-40	up	GO:0005737,cytoplasm; GO:0045548,phenylalanine ammonia-lyase activity; GO:0009800,cinnamic acid biosynthetic process; GO:0006559,L-phenylalanine catabolic process
Capana12g000520	521.694	2011.48	1.94441	4.57011e-40	up	GO:0016021,integral component of membrane; GO:0005886,plasma membrane; GO:0080054,low-affinity nitrate transmembrane transporter activity; GO:0015706,nitrate transport
Capana06g000763	234.885	1119.23	2.25132	5.0722e-40	up	--
Capana11g001016	871.123	2158.26	1.30861	5.17339e-40	up	--
Capana04g000392	435.189	1549.55	1.83475	9.78903e-40	up	GO:0046872,metal ion binding; GO:0004721,phosphoprotein phosphatase activity
Capana11g001830	187.688	854.26	2.18804	1.01677e-39	up	--
Capana02g002686	5076.74	15143.2	1.577	1.03177e-39	up	GO:0005618,cell wall; GO:0005749,mitochondrial respiratory chain complex II, succinate dehydrogenase complex (ubiquinone); GO:0005739,mitochondrion; GO:0045273,respiratory chain complex II; GO:0005524,ATP binding; GO:0050897,cobalt ion binding; GO:0009055,electron transfer activity; GO:0050660,flavin adenine dinucleotide binding; GO:0008177,succinate dehydrogenase (ubiquinone) activity; GO:000010…
Capana03g002026	635.197	1900.38	1.58006	1.08818e-39	up	GO:0009507,chloroplast; GO:0005634,nucleus; GO:0005524,ATP binding; GO:0004693,cyclin-dependent protein serine/threonine kinase activity; GO:0006468,protein phosphorylation; GO:0010468,regulation of gene expression; GO:0007346,regulation of mitotic cell cycle
Capana05g000800	1115.18	3320.94	1.57435	1.21803e-39	up	GO:0009507,chloroplast; GO:0004161,dimethylallyltranstransferase activity; GO:0004311,farnesyltranstransferase activity; GO:0004337,geranyltranstransferase activity; GO:0046872,metal ion binding; GO:0016117,carotenoid biosynthetic process; GO:0045337,farnesyl diphosphate biosynthetic process; GO:0033384,geranyl diphosphate biosynthetic process; GO:0033386,geranylgeranyl diphosphate biosynthetic p…
Capana12g002781	30.9869	1966.27	5.97184	1.39203e-39	up	GO:0016021,integral component of membrane; GO:0005774,vacuolar membrane; GO:0005773,vacuole; GO:0015140,malate transmembrane transporter activity; GO:0015743,malate transport; GO:0051453,regulation of intracellular pH; GO:0006814,sodium ion transport
Capana02g003497	842.747	2755.31	1.70985	1.49955e-39	up	GO:0009507,chloroplast; GO:0009534,chloroplast thylakoid; GO:0009535,chloroplast thylakoid membrane; GO:0005634,nucleus; GO:0009579,thylakoid; GO:0031977,thylakoid lumen; GO:0042802,identical protein binding; GO:0004252,serine-type endopeptidase activity; GO:0008236,serine-type peptidase activity; GO:0010206,photosystem II repair; GO:0030163,protein catabolic process; GO:0009735,response to cytok…
Capana08g001222	572.651	2894.44	2.33507	1.95439e-39	up	GO:0005887,integral component of plasma membrane; GO:0005249,voltage-gated potassium channel activity; GO:0034765,regulation of ion transmembrane transport; GO:0042391,regulation of membrane potential
Capana06g000748	1406.6	4569.91	1.70084	2.3349e-39	up	GO:0009570,chloroplast stroma; GO:0019843,rRNA binding; GO:0044238,primary metabolic process; GO:0006417,regulation of translation
Capana10g002344	17.3866	384.99	4.45181	2.6006e-39	up	GO:0016021,integral component of membrane; GO:0012511,monolayer-surrounded lipid storage body; GO:0004806,triglyceride lipase activity; GO:0006071,glycerol metabolic process; GO:0019433,triglyceride catabolic process; GO:0006641,triglyceride metabolic process
Capana01g002353	814.261	1960.18	1.26763	2.62429e-39	up	GO:0031410,cytoplasmic vesicle; GO:0070290,N-acylphosphatidylethanolamine-specific phospholipase D activity; GO:0035091,phosphatidylinositol binding; GO:0004630,phospholipase D activity; GO:0048017,inositol lipid-mediated signaling; GO:0008610,lipid biosynthetic process; GO:0016042,lipid catabolic process; GO:0006654,phosphatidic acid biosynthetic process; GO:0048364,root development
Capana00g003548	564.359	2113.81	1.90294	2.79938e-39	up	--
Capana01g002916	2909.96	7101.87	1.28658	3.05112e-39	up	--
Capana11g000422	640.312	5104.95	2.99691	5.24985e-39	up	GO:0005829,cytosol; GO:0051537,2 iron, 2 sulfur cluster binding; GO:0010293,abscisic aldehyde oxidase activity; GO:0004031,aldehyde oxidase activity; GO:0009055,electron transfer activity; GO:0050660,flavin adenine dinucleotide binding; GO:0050302,indole-3-acetaldehyde oxidase activity; GO:0005506,iron ion binding; GO:0016614,oxidoreductase activity, acting on CH-OH group of donors; GO:0031625,ub…
Capana03g000844	937.863	2638.05	1.49253	8.91343e-39	up	GO:0016021,integral component of membrane; GO:0005622,intracellular; GO:0005524,ATP binding; GO:0005509,calcium ion binding; GO:0003951,NAD+ kinase activity; GO:0006952,defense response; GO:0035556,intracellular signal transduction; GO:0007205,protein kinase C-activating G-protein coupled receptor signaling pathway
Capana02g002791	538.778	2936.07	2.44572	1.25252e-38	up	GO:0005737,cytoplasm; GO:0004476,mannose-6-phosphate isomerase activity; GO:0008270,zinc ion binding; GO:0000032,cell wall mannoprotein biosynthetic process; GO:0009298,GDP-mannose biosynthetic process; GO:0019853,L-ascorbic acid biosynthetic process; GO:0006486,protein glycosylation; GO:0009646,response to absence of light; GO:0046686,response to cadmium ion; GO:0046680,response to DDT; GO:00335…
Capana11g000345	1284.89	4343.06	1.75608	1.26275e-38	up	GO:0005886,plasma membrane; GO:0047558,3-cyanoalanine hydratase activity; GO:0047427,cyanoalanine nitrilase activity; GO:0006807,nitrogen compound metabolic process
Capana04g000996	463.314	1248.47	1.42921	1.38553e-38	up	GO:0005737,cytoplasm; GO:0005634,nucleus; GO:0005524,ATP binding; GO:0004674,protein serine/threonine kinase activity; GO:0009738,abscisic acid-activated signaling pathway; GO:0035556,intracellular signal transduction; GO:0006468,protein phosphorylation
Capana11g002198	16.2061	977.743	5.87735	1.64157e-38	up	--
Capana07g002429	28.7933	723.048	4.62941	1.74917e-38	up	GO:0016021,integral component of membrane; GO:0016020,membrane; GO:0005886,plasma membrane; GO:0015293,symporter activity; GO:0003333,amino acid transmembrane transport; GO:0006865,amino acid transport
Capana07g000417	436.24	3767.87	3.10993	2.7698e-38	up	--
Capana03g000136	4281.91	23589	2.46197	3.54285e-38	up	GO:0005783,endoplasmic reticulum; GO:0016021,integral component of membrane; GO:0005773,vacuole; GO:0008374,O-acyltransferase activity; GO:0046027,phospholipid:diacylglycerol acyltransferase activity; GO:0006071,glycerol metabolic process; GO:0019432,triglyceride biosynthetic process
Capana03g000560	176.055	2924.93	4.05794	4.43455e-38	up	GO:0005634,nucleus; GO:0003677,DNA binding; GO:0003700,DNA binding transcription factor activity; GO:0000981,RNA polymerase II transcription factor activity, sequence-specific DNA binding; GO:0009873,ethylene-activated signaling pathway; GO:0007275,multicellular organism development; GO:0010187,negative regulation of seed germination; GO:1901959,positive regulation of cutin biosynthetic process; …
Capana12g001848	1685.9	4389.28	1.37978	6.39561e-38	up	GO:0009507,chloroplast; GO:0009941,chloroplast envelope; GO:0031969,chloroplast membrane; GO:0016021,integral component of membrane; GO:0005743,mitochondrial inner membrane; GO:0005739,mitochondrion; GO:0009536,plastid; GO:0000095,S-adenosyl-L-methionine transmembrane transporter activity; GO:0009658,chloroplast organization; GO:0006839,mitochondrial transport; GO:0015805,S-adenosyl-L-methionine …
Capana09g000141	6833.43	14952.4	1.12991	1.20076e-37	up	GO:0048046,apoplast; GO:0009507,chloroplast; GO:0009941,chloroplast envelope; GO:0009570,chloroplast stroma; GO:0009535,chloroplast thylakoid membrane; GO:0005759,mitochondrial matrix; GO:0005739,mitochondrion; GO:0009536,plastid; GO:0009579,thylakoid; GO:0005524,ATP binding; GO:0051087,chaperone binding; GO:0005507,copper ion binding; GO:0051082,unfolded protein binding; GO:0051085,chaperone cof…
Capana01g001657	29.7728	994.242	5.04462	1.31511e-37	up	GO:0005739,mitochondrion; GO:0009408,response to heat; GO:0009644,response to high light intensity; GO:0042542,response to hydrogen peroxide
Capana07g001878	229.259	925.966	2.01741	1.60884e-37	up	GO:0016021,integral component of membrane; GO:0020037,heme binding; GO:0005506,iron ion binding; GO:0004497,monooxygenase activity; GO:0016705,oxidoreductase activity, acting on paired donors, with incorporation or reduction of molecular oxygen
Capana04g001713	495.158	1543.91	1.64136	1.67257e-37	up	GO:0009507,chloroplast; GO:0005829,cytosol; GO:0005634,nucleus; GO:0043014,alpha-tubulin binding; GO:0048487,beta-tubulin binding; GO:0032041,NAD-dependent histone deacetylase activity (H3-K14 specific); GO:0051721,protein phosphatase 2A binding; GO:0043621,protein self-association; GO:0042903,tubulin deacetylase activity; GO:0006355,regulation of transcription, DNA-templated; GO:0006351,transcri…
Capana00g005006	1594.71	4117.18	1.3689	1.71505e-37	up	--
Capana06g000896	20741.8	50860.5	1.2941	1.77585e-37	up	GO:0005737,cytoplasm; GO:0004365,glyceraldehyde-3-phosphate dehydrogenase (NAD+) (phosphorylating) activity; GO:0051287,NAD binding; GO:0050661,NADP binding; GO:0006006,glucose metabolic process; GO:0006096,glycolytic process
Capana03g002662	197.671	913.687	2.20561	1.88566e-37	up	GO:0005737,cytoplasm; GO:0005634,nucleus; GO:0005524,ATP binding; GO:0016301,kinase activity; GO:0004672,protein kinase activity; GO:0004674,protein serine/threonine kinase activity; GO:0035556,intracellular signal transduction; GO:0045727,positive regulation of translation; GO:0006468,protein phosphorylation; GO:0009409,response to cold; GO:0009408,response to heat; GO:0009651,response to salt s…
Capana01g002741	114.52	974.204	3.094	1.95572e-37	up	--
Capana06g000389	22.3804	535.107	4.59972	1.97891e-37	up	--
Capana12g000049	151.836	1303.38	3.10882	2.02397e-37	up	GO:0005634,nucleus; GO:0001046,core promoter sequence-specific DNA binding; GO:0003700,DNA binding transcription factor activity; GO:0046983,protein dimerization activity; GO:0001228,transcriptional activator activity, RNA polymerase II transcription regulatory region sequence-specific DNA binding; GO:0042335,cuticle development; GO:0048573,photoperiodism, flowering; GO:0010119,regulation of stom…
Capana00g000035	111.29	13069.9	6.87155	2.40342e-37	up	--
Capana03g004399	2809.59	7627.32	1.44022	2.9376e-37	up	GO:0005739,mitochondrion; GO:0005524,ATP binding; GO:0042026,protein refolding
Capana02g001288	978.522	3733.5	1.93053	3.38273e-37	up	GO:0046872,metal ion binding; GO:0004842,ubiquitin-protein transferase activity; GO:0006952,defense response; GO:0043161,proteasome-mediated ubiquitin-dependent protein catabolic process; GO:0043067,regulation of programmed cell death
Capana05g001636	369.306	1307.41	1.82563	3.46013e-37	up	GO:0005576,extracellular region; GO:0004180,carboxypeptidase activity; GO:0016747,transferase activity, transferring acyl groups other than amino-acyl groups; GO:0019748,secondary metabolic process
Capana01g002573	7645.43	29664.1	1.9562	3.6152e-37	up	GO:0003677,DNA binding; GO:0008270,zinc ion binding
Capana04g000214	94.4286	576.414	2.60477	4.87561e-37	up	--
Capana12g000228	2452.05	5958.61	1.28155	4.89574e-37	up	GO:0005737,cytoplasm; GO:0005730,nucleolus; GO:0005524,ATP binding; GO:0004004,ATP-dependent RNA helicase activity; GO:0003723,RNA binding; GO:0000398,mRNA splicing, via spliceosome; GO:0010468,regulation of gene expression; GO:0010501,RNA secondary structure unwinding
Capana07g000083	1005.81	2374.84	1.23963	5.40279e-37	up	GO:0009535,chloroplast thylakoid membrane; GO:0016021,integral component of membrane; GO:0015031,protein transport
Capana03g002084	6837.75	29708	2.1194	5.66239e-37	up	GO:0009507,chloroplast; GO:0009570,chloroplast stroma; GO:0005739,mitochondrion; GO:0005524,ATP binding; GO:0016301,kinase activity; GO:0000287,magnesium ion binding; GO:0030955,potassium ion binding; GO:0004743,pyruvate kinase activity; GO:0006633,fatty acid biosynthetic process; GO:0006629,lipid metabolic process; GO:0046686,response to cadmium ion; GO:0048316,seed development; GO:0010431,seed …
Capana08g001332	254.998	2197.88	3.10859	7.13062e-37	up	GO:0016021,integral component of membrane; GO:0005886,plasma membrane; GO:0005774,vacuolar membrane; GO:0015386,potassium:proton antiporter activity; GO:0015385,sodium:proton antiporter activity; GO:0055075,potassium ion homeostasis; GO:0010107,potassium ion import; GO:0051453,regulation of intracellular pH; GO:0090333,regulation of stomatal closure; GO:0009651,response to salt stress; GO:0098719…
Capana03g002645	996.761	2921	1.55147	1.02748e-36	up	--
Capana01g000072	74.1469	766.67	3.37666	1.0567e-36	up	GO:0009706,chloroplast inner membrane; GO:0005516,calmodulin binding; GO:0016491,oxidoreductase activity; GO:0015031,protein transport
Capana00g004587	7.03563	310.329	5.43766	1.33001e-36	up	--
Capana10g001951	724.104	2102.38	1.53685	2.25769e-36	up	GO:0005730,nucleolus; GO:0019843,rRNA binding; GO:0000463,maturation of LSU-rRNA from tricistronic rRNA transcript (SSU-rRNA, 5.8S rRNA, LSU-rRNA); GO:0000027,ribosomal large subunit assembly
Capana10g002504	3364.6	10993.9	1.70872	2.55095e-36	up	GO:0009507,chloroplast; GO:0048529,magnesium-protoporphyrin IX monomethyl ester (oxidative) cyclase activity; GO:0046872,metal ion binding; GO:0015995,chlorophyll biosynthetic process; GO:0015979,photosynthesis
Capana11g001015	920.927	4982.57	2.43534	2.92754e-36	up	GO:0004842,ubiquitin-protein transferase activity; GO:0010305,leaf vascular tissue pattern formation; GO:0010928,regulation of auxin mediated signaling pathway; GO:0031146,SCF-dependent proteasomal ubiquitin-dependent protein catabolic process; GO:0060776,simple leaf morphogenesis
Capana07g002233	1125.67	2501.86	1.15247	3.03103e-36	up	--
Capana03g000444	980.709	3490.85	1.8327	3.50234e-36	up	--
Capana10g000553	19.794	436.566	4.45089	4.22031e-36	up	--
Capana03g001600	916.137	2399.49	1.38754	4.50333e-36	up	--
Capana11g001913	16.2492	510.062	4.93876	5.3238e-36	up	--
Capana03g000534	627.763	1700.35	1.43682	6.03127e-36	up	--
Capana11g001098	2701.36	5576.36	1.04509	6.24758e-36	up	GO:0000785,chromatin; GO:0005829,cytosol; GO:0005634,nucleus; GO:0003682,chromatin binding; GO:0005085,guanyl-nucleotide exchange factor activity; GO:0042802,identical protein binding; GO:0009881,photoreceptor activity; GO:0042803,protein homodimerization activity; GO:0009649,entrainment of circadian clock; GO:0018298,protein-chromophore linkage; GO:0009411,response to UV; GO:0010224,response to …
Capana01g002330	715.389	2032.57	1.50568	6.44009e-36	up	GO:0005777,peroxisome; GO:0004300,enoyl-CoA hydratase activity; GO:0006635,fatty acid beta-oxidation
Capana03g001378	515.578	1426	1.46916	8.28769e-36	up	GO:0009507,chloroplast; GO:0009570,chloroplast stroma; GO:0005829,cytosol; GO:0009295,nucleoid; GO:0009508,plastid chromosome; GO:0003676,nucleic acid binding
Capana02g000806	604.01	2054.44	1.76819	8.53753e-36	up	--
Capana00g000500	353.416	995.412	1.49259	1.46827e-35	up	--
Capana06g000543	6945.01	25213.8	1.86023	1.70024e-35	up	GO:0005524,ATP binding; GO:0016787,hydrolase activity; GO:0007049,cell cycle
Capana07g000822	343.985	1912.99	2.47423	2.29893e-35	up	--
Capana04g001042	84.713	479.233	2.50291	2.56458e-35	up	--
Capana05g000154	1028.63	2605.09	1.34083	2.8005e-35	up	GO:0005829,cytosol; GO:0003985,acetyl-CoA C-acetyltransferase activity; GO:0046872,metal ion binding; GO:0006635,fatty acid beta-oxidation
Capana01g003816	1015.18	2778.22	1.45324	3.48612e-35	up	--
Capana03g003657	1527.33	4647.32	1.60542	3.79385e-35	up	GO:0009507,chloroplast; GO:0005524,ATP binding; GO:0005525,GTP binding; GO:0008728,GTP diphosphokinase activity; GO:0016301,kinase activity; GO:0015969,guanosine tetraphosphate metabolic process
Capana03g003656	2069.54	9325.48	2.17175	3.80139e-35	up	GO:0016157,sucrose synthase activity; GO:0005985,sucrose metabolic process
Capana10g001790	63.1001	627.193	3.30144	4.04458e-35	up	GO:0005634,nucleus; GO:0003700,DNA binding transcription factor activity; GO:0043565,sequence-specific DNA binding; GO:0001190,transcriptional activator activity, RNA polymerase II transcription factor binding; GO:0032922,circadian regulation of gene expression; GO:0043966,histone H3 acetylation; GO:0048573,photoperiodism, flowering; GO:0042753,positive regulation of circadian rhythm; GO:0010628,…
Capana03g002300	648.802	1747.02	1.4283	4.37815e-35	up	GO:0005737,cytoplasm; GO:0046914,transition metal ion binding; GO:0046916,cellular transition metal ion homeostasis; GO:0030001,metal ion transport
Capana05g002056	8.83953	299.974	5.06634	4.38455e-35	up	GO:0005794,Golgi apparatus; GO:0016021,integral component of membrane; GO:1990538,xylan O-acetyltransferase activity; GO:0009834,plant-type secondary cell wall biogenesis; GO:1990937,xylan acetylation
Capana03g004549	15.546	573.79	5.18153	5.65031e-35	up	--
Capana04g001600	333.149	1435.83	2.1041	6.52349e-35	up	GO:0016021,integral component of membrane; GO:0005886,plasma membrane; GO:0005524,ATP binding; GO:0008553,proton-exporting ATPase activity, phosphorylative mechanism; GO:0046872,metal ion binding; GO:0006754,ATP biosynthetic process
Capana03g003820	396.811	3156.4	2.98896	7.14587e-35	up	GO:0005737,cytoplasm; GO:0005634,nucleus; GO:0010309,acireductone dioxygenase [iron(II)-requiring] activity; GO:0046872,metal ion binding; GO:0019509,L-methionine salvage from methylthioadenosine; GO:0006555,methionine metabolic process
Capana02g000611	2883.61	11756.8	2.02711	9.55891e-35	up	GO:0009734,auxin-activated signaling pathway; GO:0071470,cellular response to osmotic stress; GO:0010928,regulation of auxin mediated signaling pathway; GO:2000028,regulation of photoperiodism, flowering
Capana02g001736	277.068	4293.8	3.95025	1.67913e-34	up	GO:0005618,cell wall; GO:0005794,Golgi apparatus; GO:0016021,integral component of membrane; GO:0005886,plasma membrane; GO:0016760,cellulose synthase (UDP-forming) activity; GO:0046872,metal ion binding; GO:0071555,cell wall organization; GO:0030244,cellulose biosynthetic process; GO:0042742,defense response to bacterium; GO:0050832,defense response to fungus; GO:0009833,plant-type primary cell …
Capana10g001749	328.624	1306.8	1.99373	1.7957e-34	up	--
Capana07g000916	110.989	772.671	2.79828	1.98228e-34	up	GO:0004190,aspartic-type endopeptidase activity; GO:0006629,lipid metabolic process
Capana02g001895	645.819	2029.16	1.65301	2.74199e-34	up	--
Capana03g004100	764.11	2252.7	1.56033	2.77085e-34	up	GO:0009941,chloroplast envelope; GO:0016874,ligase activity; GO:0006631,fatty acid metabolic process
Capana02g002919	1718.71	3934.46	1.1955	2.82172e-34	up	GO:0005739,mitochondrion; GO:0005524,ATP binding; GO:0031071,cysteine desulfurase activity; GO:0051536,iron-sulfur cluster binding; GO:0030170,pyridoxal phosphate binding; GO:0008270,zinc ion binding; GO:0044571,[2Fe-2S] cluster assembly; GO:0016226,iron-sulfur cluster assembly
Capana02g003255	17.5122	516.247	4.84434	3.21673e-34	up	GO:0046658,anchored component of plasma membrane; GO:0005886,plasma membrane; GO:0008081,phosphoric diester hydrolase activity; GO:0006629,lipid metabolic process
Capana11g002212	1053.68	4814.01	2.19059	3.95537e-34	up	GO:0009507,chloroplast; GO:0009707,chloroplast outer membrane; GO:0009902,chloroplast relocation
Capana03g004224	96.7244	557.056	2.51808	4.20176e-34	up	GO:0005737,cytoplasm; GO:0016020,membrane; GO:0043531,ADP binding; GO:0005524,ATP binding; GO:0009626,plant-type hypersensitive response
Capana02g001578	1766.64	6238.71	1.82059	4.22802e-34	up	GO:0009941,chloroplast envelope; GO:0009535,chloroplast thylakoid membrane; GO:0031357,integral component of chloroplast inner membrane; GO:0070417,cellular response to cold; GO:0009631,cold acclimation
Capana03g001927	60.8582	1146.15	4.24738	4.36059e-34	up	GO:0009507,chloroplast; GO:0070402,NADPH binding; GO:0050236,pyridoxine:NADP 4-dehydrogenase activity; GO:0009443,pyridoxal 5'-phosphate salvage; GO:0042821,pyridoxal biosynthetic process; GO:0042820,vitamin B6 catabolic process
Capana04g000445	17.4687	588.943	5.03777	4.62226e-34	up	GO:0005737,cytoplasm; GO:0000151,ubiquitin ligase complex; GO:0046872,metal ion binding; GO:0031624,ubiquitin conjugating enzyme binding; GO:0061630,ubiquitin protein ligase activity; GO:0032436,positive regulation of proteasomal ubiquitin-dependent protein catabolic process; GO:0000209,protein polyubiquitination; GO:0042787,NA
Capana02g000496	73.87	1279.58	4.12623	5.28883e-34	up	GO:0005634,nucleus; GO:0003700,DNA binding transcription factor activity; GO:0043565,sequence-specific DNA binding; GO:0071497,cellular response to freezing; GO:0009873,ethylene-activated signaling pathway; GO:0019760,glucosinolate metabolic process; GO:0045893,positive regulation of transcription, DNA-templated; GO:0009737,response to abscisic acid; GO:0009723,response to ethylene; GO:0009753,re…
Capana09g001935	2146.8	5727.05	1.41509	6.22754e-34	up	GO:0005736,DNA-directed RNA polymerase I complex; GO:0005665,DNA-directed RNA polymerase II, core complex; GO:0005666,DNA-directed RNA polymerase III complex; GO:0000418,DNA-directed RNA polymerase IV complex; GO:0000419,DNA-directed RNA polymerase V complex; GO:0003677,DNA binding; GO:0003899,DNA-directed 5'-3' RNA polymerase activity; GO:0006360,transcription by RNA polymerase I; GO:0006366,tra…
Capana09g001928	36872.8	158650	2.10526	6.37379e-34	up	GO:0005524,ATP binding
Capana09g000731	505.605	1778.87	1.8127	6.38288e-34	up	GO:0005739,mitochondrion; GO:0005524,ATP binding; GO:0052381,tRNA dimethylallyltransferase activity; GO:0009691,cytokinin biosynthetic process; GO:0006400,tRNA modification
Capana12g000846	4.01514	283.368	6.1709	6.85891e-34	up	GO:0005634,nucleus; GO:0003700,DNA binding transcription factor activity; GO:0046983,protein dimerization activity; GO:0000977,RNA polymerase II regulatory region sequence-specific DNA binding; GO:0045944,positive regulation of transcription by RNA polymerase II; GO:0006351,transcription, DNA-templated
Capana00g001532	75.1547	468.231	2.64594	7.08047e-34	up	--
Capana01g003517	1190.85	2465.64	1.05015	7.26092e-34	up	GO:0009507,chloroplast; GO:0005783,endoplasmic reticulum; GO:0016021,integral component of membrane; GO:0042742,defense response to bacterium; GO:0009873,ethylene-activated signaling pathway; GO:0043069,negative regulation of programmed cell death; GO:0009626,plant-type hypersensitive response; GO:0009723,response to ethylene; GO:0009751,response to salicylic acid
Capana01g003722	129.278	586.538	2.18106	7.44686e-34	up	GO:0016021,integral component of membrane; GO:0005886,plasma membrane; GO:0005774,vacuolar membrane; GO:0015079,potassium ion transmembrane transporter activity; GO:0009932,cell tip growth
Capana03g002786	1978.86	6234.06	1.65621	8.0743e-34	up	GO:0009507,chloroplast; GO:0031969,chloroplast membrane; GO:0016021,integral component of membrane; GO:0005634,nucleus; GO:1904143,positive regulation of carotenoid biosynthetic process; GO:0050821,protein stabilization
Capana03g004132	245.6	33962.7	7.11012	8.12944e-34	up	--
Capana04g000015	971.479	2675.67	1.46283	9.74642e-34	up	GO:0009507,chloroplast; GO:0010287,plastoglobule; GO:0005524,ATP binding; GO:0004672,protein kinase activity; GO:0006995,cellular response to nitrogen starvation; GO:0009658,chloroplast organization; GO:0080177,plastoglobule organization; GO:0050821,protein stabilization; GO:1902171,regulation of tocopherol cyclase activity; GO:0009644,response to high light intensity; GO:0080183,response to phot…
Capana08g001932	422.641	1451.96	1.7815	1.00957e-33	up	--
Capana11g002179	425.303	1872.68	2.14003	1.50759e-33	up	GO:0031969,chloroplast membrane; GO:0046608,carotenoid isomerase activity; GO:0016491,oxidoreductase activity; GO:0016117,carotenoid biosynthetic process
Capana03g001041	6879.06	31935.7	2.21484	1.52283e-33	up	GO:0005829,cytosol; GO:0005634,nucleus; GO:0003677,DNA binding; GO:0006355,regulation of transcription, DNA-templated; GO:0006351,transcription, DNA-templated
Capana05g001907	62.7663	603.291	3.25905	1.5971e-33	up	--
Capana06g001872	470.275	1211	1.36301	1.67754e-33	up	GO:0009941,chloroplast envelope; GO:0031969,chloroplast membrane; GO:0016021,integral component of membrane; GO:0005739,mitochondrion; GO:0009536,plastid; GO:0032502,developmental process; GO:0010224,response to UV-B
Capana01g004099	1207.72	4791.42	1.98849	1.68528e-33	up	GO:0009507,chloroplast; GO:0009941,chloroplast envelope; GO:0009534,chloroplast thylakoid
Capana11g002390	692.51	1947.05	1.4927	1.78084e-33	up	GO:0009507,chloroplast; GO:0009941,chloroplast envelope; GO:0016021,integral component of membrane; GO:0005886,plasma membrane; GO:0005524,ATP binding; GO:0042626,ATPase activity, coupled to transmembrane movement of substances
Capana06g002525	3067.16	6964.3	1.18309	1.86248e-33	up	GO:0005618,cell wall; GO:0009507,chloroplast; GO:0009570,chloroplast stroma; GO:0005829,cytosol; GO:0005794,Golgi apparatus; GO:0005886,plasma membrane; GO:0009506,plasmodesma; GO:0004130,cytochrome-c peroxidase activity; GO:0020037,heme binding; GO:0016688,L-ascorbate peroxidase activity; GO:0046872,metal ion binding; GO:0034599,cellular response to oxidative stress; GO:0009793,embryo developmen…
Capana08g000973	92.9234	590.91	2.66159	1.92493e-33	up	GO:0005634,nucleus; GO:0043078,polar nucleus; GO:0003700,DNA binding transcription factor activity; GO:0046983,protein dimerization activity; GO:0000977,RNA polymerase II regulatory region sequence-specific DNA binding; GO:0009559,embryo sac central cell differentiation; GO:0045944,positive regulation of transcription by RNA polymerase II; GO:0006351,transcription, DNA-templated
Capana03g003499	900.244	3370.49	1.9059	1.96985e-33	up	--
Capana12g002081	178.461	3525.54	4.30381	2.03917e-33	up	GO:0005634,nucleus; GO:0003677,DNA binding; GO:0003700,DNA binding transcription factor activity; GO:0006952,defense response; GO:0009873,ethylene-activated signaling pathway; GO:0006351,transcription, DNA-templated
Capana09g000621	5.6665	265.235	5.59693	2.33084e-33	up	--
Capana08g001763	324.142	1358.82	2.0648	2.41642e-33	up	--
Capana00g000197	8.57206	241.325	4.7991	2.55695e-33	up	--
Capana07g001872	11.8879	442.24	5.19102	2.6151e-33	up	GO:0016021,integral component of membrane; GO:0020037,heme binding; GO:0005506,iron ion binding; GO:0004497,monooxygenase activity; GO:0016705,oxidoreductase activity, acting on paired donors, with incorporation or reduction of molecular oxygen
Capana06g000295	411.729	2598.33	2.65762	2.73479e-33	up	GO:0000214,tRNA-intron endonuclease complex; GO:0016829,lyase activity; GO:0000213,tRNA-intron endonuclease activity; GO:0006397,mRNA processing; GO:0000379,tRNA-type intron splice site recognition and cleavage; GO:0010069,zygote asymmetric cytokinesis in embryo sac
Capana04g002560	2.60339	709.107	8.048	3.58253e-33	up	GO:0016021,integral component of membrane; GO:0005886,plasma membrane; GO:0005524,ATP binding; GO:0004674,protein serine/threonine kinase activity; GO:0042742,defense response to bacterium; GO:0006468,protein phosphorylation
Capana03g000576	92.35	538.129	2.54056	3.64955e-33	up	GO:0009570,chloroplast stroma; GO:0005524,ATP binding
Capana08g000725	6.68065	295.255	5.47339	3.66481e-33	up	--
Capana06g003058	4429.05	12082.4	1.44785	4.14944e-33	up	GO:0004364,glutathione transferase activity; GO:0009734,auxin-activated signaling pathway
Capana02g000904	16.4586	340.492	4.39367	5.614e-33	up	--
Capana01g001380	449.559	1235.97	1.46006	5.68584e-33	up	--
Capana05g000817	399.637	3858.96	3.26851	6.37006e-33	up	GO:0009507,chloroplast; GO:0010150,leaf senescence
Capana07g001245	10341.3	43574.8	2.0752	6.41118e-33	up	GO:0009941,chloroplast envelope; GO:0009535,chloroplast thylakoid membrane; GO:0016021,integral component of membrane; GO:0009522,photosystem I; GO:0009523,photosystem II; GO:0010287,plastoglobule; GO:0016168,chlorophyll binding; GO:0046872,metal ion binding; GO:0031409,pigment binding; GO:0009768,photosynthesis, light harvesting in photosystem I; GO:0018298,protein-chromophore linkage; GO:000941…
Capana12g000008	305.619	1369.74	2.16121	6.95185e-33	up	GO:0016020,membrane; GO:0005747,mitochondrial respiratory chain complex I; GO:0005739,mitochondrion; GO:0055114,oxidation-reduction process
Capana06g001468	4173.02	12504.4	1.58336	8.23453e-33	up	GO:0005737,cytoplasm; GO:0005730,nucleolus; GO:0005681,spliceosomal complex; GO:0005524,ATP binding; GO:0004386,helicase activity; GO:0003723,RNA binding; GO:0006974,cellular response to DNA damage stimulus; GO:0006406,mRNA export from nucleus; GO:0000398,mRNA splicing, via spliceosome; GO:0010468,regulation of gene expression; GO:0010501,RNA secondary structure unwinding
Capana06g003007	119.643	666.747	2.48051	1.01088e-32	up	GO:0016021,integral component of membrane; GO:0005886,plasma membrane; GO:0050832,defense response to fungus
Capana03g001987	476.229	2103.01	2.14279	1.07159e-32	up	--
Capana02g003061	569.799	2656.66	2.22289	1.37039e-32	up	GO:0009507,chloroplast; GO:0045454,cell redox homeostasis
Capana12g001807	345.454	1932.63	2.48382	1.39967e-32	up	GO:0009507,chloroplast; GO:0009543,chloroplast thylakoid lumen; GO:0009535,chloroplast thylakoid membrane; GO:0009579,thylakoid; GO:0005528,FK506 binding; GO:0003755,peptidyl-prolyl cis-trans isomerase activity; GO:0061077,chaperone-mediated protein folding
Capana01g002966	6399.34	20847.6	1.70367	1.43217e-32	up	--
Capana12g002911	568.698	2031.24	1.83786	1.81011e-32	up	GO:0016021,integral component of membrane; GO:0005622,intracellular; GO:0005524,ATP binding; GO:0004143,diacylglycerol kinase activity; GO:0046872,metal ion binding; GO:0003951,NAD+ kinase activity; GO:0006952,defense response; GO:0035556,intracellular signal transduction; GO:0048366,leaf development; GO:0007205,protein kinase C-activating G-protein coupled receptor signaling pathway; GO:0009409,…
Capana03g001267	2858.2	6526.61	1.19132	2.04931e-32	up	GO:0009507,chloroplast; GO:0009570,chloroplast stroma; GO:0005829,cytosol; GO:0005507,copper ion binding; GO:0004425,indole-3-glycerol-phosphate synthase activity; GO:0000162,tryptophan biosynthetic process
Capana06g002079	0	2988.86	14.1196	2.29313e-32	up	--
Capana01g002754	211.885	820.023	1.94904	2.53841e-32	up	--
Capana01g004338	47.1318	462.601	3.29945	2.54073e-32	up	--
Capana08g002581	571.598	1762.4	1.62262	2.72197e-32	up	GO:0000785,chromatin; GO:0005677,chromatin silencing complex; GO:0005634,nucleus; GO:0003682,chromatin binding; GO:0046872,metal ion binding; GO:0035064,methylated histone binding; GO:0000976,transcription regulatory region sequence-specific DNA binding; GO:0006325,chromatin organization; GO:0006342,chromatin silencing; GO:0016569,covalent chromatin modification; GO:0009908,flower development; GO…
Capana03g000851	678.56	1705.36	1.33146	3.48402e-32	up	GO:0009504,cell plate; GO:0009507,chloroplast; GO:0016021,integral component of membrane; GO:0005886,plasma membrane; GO:0005484,SNAP receptor activity; GO:0000911,cytokinesis by cell plate formation; GO:0061025,membrane fusion; GO:0015031,protein transport; GO:0009737,response to abscisic acid; GO:0009612,response to mechanical stimulus; GO:0051707,response to other organism; GO:0016192,vesicle-…
Capana12g000140	258.202	939.061	1.86482	3.62158e-32	up	--
Capana09g001808	293.513	930.729	1.66657	3.97478e-32	up	GO:0005634,nucleus; GO:0003700,DNA binding transcription factor activity; GO:0000981,RNA polymerase II transcription factor activity, sequence-specific DNA binding; GO:0043565,sequence-specific DNA binding; GO:0001135,transcription factor activity, RNA polymerase II transcription factor recruiting; GO:0044212,transcription regulatory region DNA binding; GO:0030154,cell differentiation; GO:0008285…
Capana02g000850	3603.87	7857.5	1.12507	4.09497e-32	up	GO:0016491,oxidoreductase activity
Capana06g000465	1424.55	6130.86	2.10544	4.10803e-32	up	GO:0048046,apoplast; GO:0016853,isomerase activity
Capana10g001551	126.912	520.117	2.03151	5.20908e-32	up	GO:0009507,chloroplast; GO:0009534,chloroplast thylakoid; GO:0009579,thylakoid; GO:0005524,ATP binding; GO:0004672,protein kinase activity; GO:0004674,protein serine/threonine kinase activity; GO:0042549,photosystem II stabilization
Capana01g003777	684.517	2064.79	1.59163	5.27169e-32	up	GO:0005737,cytoplasm; GO:0016791,phosphatase activity; GO:0016757,transferase activity, transferring glycosyl groups; GO:0005992,trehalose biosynthetic process; GO:0070413,trehalose metabolism in response to stress
Capana01g002133	939.794	2070.78	1.14011	5.31119e-32	up	GO:0051213,dioxygenase activity; GO:0046872,metal ion binding; GO:0009267,cellular response to starvation
Capana09g002184	199.352	898.385	2.17364	5.43494e-32	up	GO:0016021,integral component of membrane; GO:0005886,plasma membrane; GO:0050832,defense response to fungus
Capana02g002577	4034.7	10764.1	1.41607	5.77211e-32	up	GO:0009570,chloroplast stroma; GO:0009535,chloroplast thylakoid membrane; GO:0004324,ferredoxin-NADP+ reductase activity; GO:0015979,photosynthesis
Capana05g002400	680.619	2651.3	1.96184	6.00295e-32	up	GO:0005887,integral component of plasma membrane; GO:0008271,secondary active sulfate transmembrane transporter activity; GO:0015116,sulfate transmembrane transporter activity; GO:0015293,symporter activity
Capana00g001353	374.115	1146.78	1.61789	6.30419e-32	up	--
Capana02g001318	1796.87	4201.48	1.22543	8.76631e-32	up	--
Capana11g001097	293.218	955.798	1.70192	9.58101e-32	up	GO:0005832,chaperonin-containing T-complex; GO:0005829,cytosol; GO:0005886,plasma membrane; GO:0009506,plasmodesma; GO:0005524,ATP binding; GO:0044183,protein binding involved in protein folding; GO:0051082,unfolded protein binding; GO:0006458,'de novo' protein folding; GO:0061077,chaperone-mediated protein folding
Capana02g002965	74.8813	437.479	2.55104	1.27709e-31	up	--
Capana05g001028	115.888	494.715	2.09311	1.55476e-31	up	GO:0009507,chloroplast; GO:0009941,chloroplast envelope; GO:0009707,chloroplast outer membrane; GO:0016021,integral component of membrane; GO:0046872,metal ion binding; GO:0004842,ubiquitin-protein transferase activity; GO:0006996,organelle organization
Capana05g002369	3.81907	265.099	6.18175	1.65617e-31	up	--
Capana04g000114	253.655	2111.25	3.05977	1.67746e-31	up	--
Capana12g002267	1150.5	2490.56	1.11416	1.68737e-31	up	--
Capana08g002330	403.092	2553.95	2.66069	2.01225e-31	up	GO:0042802,identical protein binding; GO:0050275,scopoletin glucosyltransferase activity; GO:0008152,metabolic process
Capana08g000944	335.973	1413.11	2.07382	2.0992e-31	up	GO:0005829,cytosol; GO:0005524,ATP binding; GO:0061630,ubiquitin protein ligase activity; GO:0031625,ubiquitin protein ligase binding; GO:0004842,ubiquitin-protein transferase activity; GO:0006511,ubiquitin-dependent protein catabolic process
Capana00g004295	950.05	3192.89	1.74915	2.33343e-31	up	--
Capana08g001184	1985.17	4568.57	1.20274	2.48214e-31	up	GO:0017101,aminoacyl-tRNA synthetase multienzyme complex; GO:0009507,chloroplast; GO:0009570,chloroplast stroma; GO:0005739,mitochondrion; GO:0005524,ATP binding; GO:0004827,proline-tRNA ligase activity; GO:0009553,embryo sac development; GO:0048481,plant ovule development; GO:0006433,prolyl-tRNA aminoacylation; GO:0010109,regulation of photosynthesis; GO:0048316,seed development
Capana01g003488	39.1709	487.098	3.63476	2.50872e-31	up	--
Capana06g002444	848.827	2293.29	1.4337	3.00353e-31	up	GO:0005737,cytoplasm; GO:0046872,metal ion binding; GO:0004842,ubiquitin-protein transferase activity; GO:0009966,regulation of signal transduction
Capana03g004056	23.3946	272.682	3.56089	3.6156e-31	up	--
Capana07g001128	637.167	2396.58	1.91231	3.78602e-31	up	GO:0005737,cytoplasm; GO:0005524,ATP binding; GO:0004672,protein kinase activity; GO:0004674,protein serine/threonine kinase activity; GO:0004871,signal transducer activity; GO:0035556,intracellular signal transduction
Capana01g003420	2.61314	409.094	7.13386	4.1824e-31	up	GO:0016021,integral component of membrane; GO:0020037,heme binding; GO:0005506,iron ion binding; GO:0004497,monooxygenase activity; GO:0016705,oxidoreductase activity, acting on paired donors, with incorporation or reduction of molecular oxygen
Capana01g000791	1308.59	3356.18	1.36018	4.94606e-31	up	--
Capana08g002047	555.96	1760.08	1.66355	5.03909e-31	up	--
Capana11g001122	1208.65	3045.92	1.33446	5.2326e-31	up	GO:0009507,chloroplast; GO:0009941,chloroplast envelope; GO:0009534,chloroplast thylakoid; GO:0009535,chloroplast thylakoid membrane; GO:0016021,integral component of membrane; GO:0004222,metalloendopeptidase activity; GO:0006518,peptide metabolic process
Capana03g001050	0.497784	2347.3	11.9332	5.48605e-31	up	GO:0048046,apoplast; GO:0005618,cell wall; GO:0030145,manganese ion binding; GO:0045735,nutrient reservoir activity
Capana05g001390	297.007	1602.36	2.43216	5.50518e-31	up	GO:0005737,cytoplasm; GO:0016791,phosphatase activity; GO:0016757,transferase activity, transferring glycosyl groups; GO:0005992,trehalose biosynthetic process; GO:0070413,trehalose metabolism in response to stress
Capana03g001841	1259.75	3276.8	1.38031	5.9105e-31	up	GO:0031305,integral component of mitochondrial inner membrane; GO:0005743,mitochondrial inner membrane; GO:0005744,mitochondrial inner membrane presequence translocase complex; GO:0005741,mitochondrial outer membrane; GO:0005739,mitochondrion; GO:0030150,protein import into mitochondrial matrix
Capana02g001706	62.7418	565.524	3.16498	6.05683e-31	up	GO:0016021,integral component of membrane; GO:0005886,plasma membrane; GO:0005524,ATP binding; GO:0005516,calmodulin binding; GO:0004672,protein kinase activity; GO:0009793,embryo development ending in seed dormancy; GO:0046777,protein autophosphorylation; GO:0009733,response to auxin; GO:0009625,response to insect; GO:0006970,response to osmotic stress
Capana03g004327	170.174	1080.68	2.67077	6.07584e-31	up	--
Capana10g000088	1632.86	3454.28	1.08108	7.16795e-31	up	GO:0046872,metal ion binding; GO:0016740,transferase activity; GO:0016567,protein ubiquitination
Capana04g002899	83.2882	438.706	2.40326	8.31358e-31	up	--
Capana09g000379	312.814	1014.15	1.69445	1.19623e-30	up	--
Capana05g000680	5999.8	17038.1	1.50593	1.39768e-30	up	--
Capana06g000523	516.999	2081.33	2.01176	1.40084e-30	up	GO:0005886,plasma membrane; GO:0005524,ATP binding; GO:0016887,ATPase activity; GO:0005215,transporter activity
Capana05g000860	4.52814	543.707	6.97443	1.62815e-30	up	GO:0005576,extracellular region; GO:0016747,transferase activity, transferring acyl groups other than amino-acyl groups; GO:0006508,proteolysis; GO:0019748,secondary metabolic process
Capana08g002003	1084.88	2317.05	1.09592	1.93601e-30	up	--
Capana02g003186	110.597	1197	3.44244	2.95985e-30	up	GO:0005886,plasma membrane; GO:0046872,metal ion binding; GO:0043130,ubiquitin binding
Capana04g001234	446.639	1237.65	1.47047	3.19662e-30	up	--
Capana03g001774	674.093	1758.62	1.38302	3.76227e-30	up	GO:0016021,integral component of membrane; GO:0009705,plant-type vacuole membrane; GO:0005773,vacuole; GO:0005253,anion channel activity; GO:0015140,malate transmembrane transporter activity; GO:0071423,malate transmembrane transport; GO:0090332,stomatal closure
Capana07g002070	42.9127	532.5	3.62942	3.80069e-30	up	GO:0005794,Golgi apparatus; GO:0016021,integral component of membrane; GO:0016413,O-acetyltransferase activity; GO:0071554,cell wall organization or biogenesis
Capana00g000938	342.614	1014.82	1.5651	3.83224e-30	up	--
Capana11g002251	699.502	1992.83	1.50886	4.02678e-30	up	--
Capana10g002156	0	2047.51	13.5739	4.24149e-30	up	GO:0005783,endoplasmic reticulum; GO:0005789,endoplasmic reticulum membrane; GO:0016021,integral component of membrane; GO:0020037,heme binding; GO:0005506,iron ion binding; GO:0080133,midchain alkane hydroxylase activity; GO:0010025,wax biosynthetic process
Capana09g001329	992.517	2388.69	1.26711	5.84258e-30	up	--
Capana04g002597	53.3081	429.631	3.00136	6.49031e-30	up	GO:0005829,cytosol; GO:0005768,endosome; GO:0005802,trans-Golgi network; GO:0005096,GTPase activator activity; GO:0046872,metal ion binding; GO:0090630,activation of GTPase activity; GO:0010227,floral organ abscission
Capana01g001831	271.221	1030.95	1.9292	7.10512e-30	up	--
Capana06g001254	7.27524	248.235	5.06349	7.22973e-30	up	GO:0016021,integral component of membrane; GO:0005886,plasma membrane; GO:0005524,ATP binding; GO:0090417,N-methylnicotinate transmembrane transporter activity; GO:0090416,nicotinate transmembrane transporter activity; GO:2001143,N-methylnicotinate transport; GO:2001142,nicotinate transport
Capana07g000147	42.6426	355.558	3.04666	7.27988e-30	up	GO:0010330,cellulose synthase complex; GO:0009507,chloroplast; GO:0005794,Golgi apparatus; GO:0016021,integral component of membrane; GO:0005886,plasma membrane; GO:0016760,cellulose synthase (UDP-forming) activity; GO:0046872,metal ion binding; GO:0030244,cellulose biosynthetic process; GO:0009832,plant-type cell wall biogenesis; GO:0009833,plant-type primary cell wall biogenesis; GO:0009834,pla…
Capana05g000103	1030.23	2629.99	1.35237	9.47631e-30	up	GO:0009507,chloroplast; GO:0005525,GTP binding; GO:0003924,GTPase activity; GO:0019904,protein domain specific binding; GO:0006412,translation
Capana09g000555	1074.71	2778.86	1.37182	1.04786e-29	up	--
Capana04g000054	1371.26	3643.06	1.40954	1.34439e-29	up	GO:0009941,chloroplast envelope; GO:0034426,etioplast membrane; GO:0031359,integral component of chloroplast outer membrane; GO:0046930,pore complex; GO:0015288,porin activity; GO:0008308,voltage-gated anion channel activity; GO:0044070,regulation of anion transport
Capana08g001508	9.29042	253.135	4.76744	1.44554e-29	up	GO:0071465,cellular response to desiccation; GO:1902075,cellular response to salt
Capana01g002433	130.853	567.911	2.12261	1.58542e-29	up	--
Capana10g002512	514.75	1356.29	1.39765	1.62376e-29	up	--
Capana01g001079	662.228	1608.34	1.2803	1.84298e-29	up	GO:0009507,chloroplast; GO:0030529,NA; GO:0003723,RNA binding; GO:0006397,mRNA processing
Capana08g000991	15961.2	130060	3.02661	2.07117e-29	up	--
Capana01g000111	6.9921	1023.08	7.17386	2.08548e-29	up	GO:0009570,chloroplast stroma; GO:0004315,3-oxoacyl-[acyl-carrier-protein] synthase activity; GO:0006633,fatty acid biosynthetic process
Capana04g000127	544.966	1415.75	1.37965	2.22691e-29	up	--
Capana12g002597	1681.62	4878.31	1.53696	2.29929e-29	up	GO:0046872,metal ion binding; GO:0004439,phosphatidylinositol-4,5-bisphosphate 5-phosphatase activity; GO:0046856,phosphatidylinositol dephosphorylation
Capana11g001599	576.779	1652.93	1.51686	2.38256e-29	up	GO:0005634,nucleus; GO:0003700,DNA binding transcription factor activity; GO:0000981,RNA polymerase II transcription factor activity, sequence-specific DNA binding; GO:0043565,sequence-specific DNA binding; GO:0001135,transcription factor activity, RNA polymerase II transcription factor recruiting; GO:0044212,transcription regulatory region DNA binding; GO:0009926,auxin polar transport; GO:000973…
Capana12g000289	828.779	1957.63	1.24133	2.94611e-29	up	GO:0009507,chloroplast; GO:0005829,cytosol; GO:0043022,ribosome binding; GO:0003743,translation initiation factor activity
Capana00g002724	712.272	2341.14	1.7169	3.21631e-29	up	--
Capana03g002354	547.192	2855.39	2.38456	3.40864e-29	up	GO:0005634,nucleus; GO:0003700,DNA binding transcription factor activity; GO:0043565,sequence-specific DNA binding; GO:0010200,response to chitin; GO:0006351,transcription, DNA-templated
Capana11g002070	4163.2	14833.4	1.83333	4.08338e-29	up	GO:0004430,1-phosphatidylinositol 4-kinase activity; GO:0005524,ATP binding; GO:0046854,phosphatidylinositol phosphorylation; GO:0046777,protein autophosphorylation
Capana09g001429	608.044	2676.66	2.13908	5.03498e-29	up	GO:0005737,cytoplasm; GO:0005634,nucleus; GO:0003700,DNA binding transcription factor activity; GO:0043565,sequence-specific DNA binding; GO:0006351,transcription, DNA-templated
Capana06g001765	717.291	2380.19	1.73235	5.17552e-29	up	GO:0009507,chloroplast; GO:0005524,ATP binding; GO:0005516,calmodulin binding; GO:0003951,NAD+ kinase activity; GO:0019674,NAD metabolic process; GO:0006741,NADP biosynthetic process
Capana03g004526	98.3246	416.935	2.08315	5.48293e-29	up	--
Capana10g001459	2176.77	5576.29	1.35746	5.97944e-29	up	GO:0009507,chloroplast; GO:0030529,NA; GO:0003723,RNA binding; GO:0006397,mRNA processing
Capana00g000894	85.204	770.23	3.1778	6.10418e-29	up	--
Capana02g001587	438.126	1077.39	1.29824	7.16709e-29	up	--
Capana03g001811	302.791	1084.39	1.84179	8.19133e-29	up	GO:0047763,caffeate O-methyltransferase activity; GO:0046983,protein dimerization activity; GO:0009809,lignin biosynthetic process
Capana05g001457	2.34521	249.122	6.69949	8.58258e-29	up	--
Capana03g000198	24.6052	261.622	3.40854	9.02414e-29	up	GO:0005739,mitochondrion; GO:0070469,respiratory chain; GO:0051539,4 iron, 4 sulfur cluster binding; GO:0046872,metal ion binding; GO:0008137,NADH dehydrogenase (ubiquinone) activity; GO:0048038,quinone binding
Capana05g001741	1904.06	3857.64	1.01885	9.08657e-29	up	GO:0005634,nucleus; GO:0003700,DNA binding transcription factor activity; GO:0043565,sequence-specific DNA binding; GO:0030308,negative regulation of cell growth; GO:0048573,photoperiodism, flowering; GO:0045893,positive regulation of transcription, DNA-templated; GO:0048510,regulation of timing of transition from vegetative to reproductive phase; GO:0009637,response to blue light; GO:0006351,tra…
Capana00g000196	6.80578	2771.04	8.64395	9.80556e-29	up	--
Capana04g002332	779.136	2094.75	1.42647	1.00371e-28	up	GO:0005737,cytoplasm; GO:0005622,intracellular; GO:0005525,GTP binding; GO:0003924,GTPase activity; GO:0003746,translation elongation factor activity
Capana07g002184	872.128	2168.34	1.31344	1.19134e-28	up	GO:0005634,nucleus; GO:0005524,ATP binding; GO:0042802,identical protein binding; GO:0004672,protein kinase activity; GO:0009585,red, far-red light phototransduction
Capana01g003535	7.93439	380.884	5.56454	1.26519e-28	up	GO:0009507,chloroplast; GO:0009570,chloroplast stroma; GO:0004521,endoribonuclease activity; GO:0046872,metal ion binding; GO:0004222,metalloendopeptidase activity; GO:0009658,chloroplast organization; GO:1901259,chloroplast rRNA processing
Capana00g003105	1615.87	8858.75	2.45464	1.29587e-28	up	--
Capana01g001129	25.4385	303.478	3.58111	1.37459e-28	up	GO:0016021,integral component of membrane; GO:0005622,intracellular; GO:0050660,flavin adenine dinucleotide binding; GO:0046577,long-chain-alcohol oxidase activity; GO:0016491,oxidoreductase activity
Capana12g002796	753.261	2843.76	1.9147	1.88062e-28	up	GO:0005829,cytosol; GO:0004334,fumarylacetoacetase activity; GO:0046872,metal ion binding; GO:0008219,cell death; GO:1902000,homogentisate catabolic process; GO:0006559,L-phenylalanine catabolic process; GO:0006572,tyrosine catabolic process
Capana12g002015	601.067	1493.02	1.31314	1.98916e-28	up	GO:0016567,protein ubiquitination
Capana05g001794	205.11	649.066	1.65889	2.01773e-28	up	--
Capana06g001463	1655.08	4950.1	1.58148	2.32681e-28	up	GO:0009535,chloroplast thylakoid membrane; GO:0016021,integral component of membrane; GO:0045263,proton-transporting ATP synthase complex, coupling factor F(o); GO:0005524,ATP binding; GO:0015078,proton transmembrane transporter activity; GO:0015986,ATP synthesis coupled proton transport
Capana10g000223	1919.6	5817.05	1.60004	2.56242e-28	up	GO:0005737,cytoplasm; GO:0005730,nucleolus; GO:0005634,nucleus; GO:0090406,pollen tube; GO:0005524,ATP binding; GO:0004004,ATP-dependent RNA helicase activity; GO:0003676,nucleic acid binding; GO:0009553,embryo sac development; GO:0009561,megagametogenesis; GO:0009791,post-embryonic development; GO:0010501,RNA secondary structure unwinding; GO:0006364,rRNA processing
Capana06g002500	210.203	666.483	1.66382	2.81821e-28	up	GO:0005737,cytoplasm; GO:0016021,integral component of membrane; GO:0005654,nucleoplasm; GO:0005886,plasma membrane; GO:0005524,ATP binding; GO:0004672,protein kinase activity; GO:0004675,transmembrane receptor protein serine/threonine kinase activity; GO:0007166,cell surface receptor signaling pathway; GO:0051607,defense response to virus; GO:0040015,negative regulation of multicellular organism…
Capana00g004977	166.882	654.92	1.97402	3.01885e-28	up	--
Capana01g001115	493.96	1384.57	1.48897	3.28563e-28	up	GO:0009507,chloroplast; GO:0000287,magnesium ion binding
Capana09g001519	427.211	1169.36	1.45143	3.5564e-28	up	GO:0016021,integral component of membrane; GO:0020037,heme binding; GO:0005506,iron ion binding; GO:0004497,monooxygenase activity; GO:0050604,taxadiene 5-alpha-hydroxylase activity; GO:0042617,paclitaxel biosynthetic process
Capana12g002220	273.686	1266.81	2.21344	4.431e-28	up	GO:0005759,mitochondrial matrix; GO:0051537,2 iron, 2 sulfur cluster binding; GO:0008198,ferrous iron binding; GO:0005198,structural molecule activity; GO:0016226,iron-sulfur cluster assembly; GO:0097428,protein maturation by iron-sulfur cluster transfer
Capana03g003802	271.932	792.484	1.54198	4.4873e-28	up	GO:0016491,oxidoreductase activity
Capana12g002888	1758.31	3613.57	1.03894	5.49342e-28	up	--
Capana12g002146	16504.8	57637.9	1.80418	5.60809e-28	up	GO:0005886,plasma membrane; GO:0005524,ATP binding; GO:0031072,heat shock protein binding; GO:0046872,metal ion binding; GO:0051082,unfolded protein binding; GO:0006457,protein folding; GO:0009408,response to heat
Capana07g002269	33.0814	382.628	3.52394	5.6914e-28	up	GO:0005886,plasma membrane; GO:0005524,ATP binding; GO:0005516,calmodulin binding; GO:0030246,carbohydrate binding; GO:0004674,protein serine/threonine kinase activity; GO:0006468,protein phosphorylation; GO:0048544,recognition of pollen
Capana11g001464	537.755	2614.13	2.28311	8.10293e-28	up	--
Capana12g001657	727.46	2091.04	1.52404	8.65056e-28	up	GO:0009507,chloroplast; GO:0009570,chloroplast stroma; GO:0016149,translation release factor activity, codon specific; GO:0009657,plastid organization; GO:0006396,RNA processing; GO:0006415,translational termination
Capana03g001977	5504.9	17671.1	1.68243	9.3744e-28	up	GO:0005788,endoplasmic reticulum lumen; GO:0005524,ATP binding
Capana00g004937	2.07729	299.345	7.3507	9.72089e-28	up	--
Capana08g000060	369.059	1164.98	1.66113	1.00463e-27	up	--
Capana09g001382	5.51396	245.815	5.55446	1.00833e-27	up	--
Capana08g000245	0	1351.28	12.9744	1.16935e-27	up	GO:0005852,eukaryotic translation initiation factor 3 complex; GO:0003743,translation initiation factor activity
Capana07g002042	224.506	972.294	2.1168	1.19638e-27	up	GO:0005783,endoplasmic reticulum; GO:0009536,plastid; GO:0052924,all-trans-nonaprenyl-diphosphate synthase (geranylgeranyl-diphosphate specific) activity; GO:0046872,metal ion binding; GO:0050347,trans-octaprenyltranstransferase activity; GO:0008299,isoprenoid biosynthetic process; GO:0015979,photosynthesis; GO:0010236,plastoquinone biosynthetic process
Capana02g001775	617.921	1523.07	1.29957	1.29467e-27	up	--
Capana03g001981	693.303	2000.8	1.52985	1.90693e-27	up	GO:0009507,chloroplast; GO:0009295,nucleoid; GO:0009508,plastid chromosome; GO:0000427,plastid-encoded plastid RNA polymerase complex; GO:0009658,chloroplast organization; GO:0006355,regulation of transcription, DNA-templated; GO:0009416,response to light stimulus; GO:0010027,thylakoid membrane organization; GO:0042793,plastid transcription
Capana01g000155	982.044	2208.45	1.16933	2.11686e-27	up	GO:0009507,chloroplast; GO:0005525,GTP binding; GO:0003924,GTPase activity; GO:0003743,translation initiation factor activity
Capana00g001522	999.009	3578.93	1.84139	2.27196e-27	up	--
Capana01g002802	3103.44	9033.86	1.54158	2.46206e-27	up	GO:0005737,cytoplasm; GO:0005829,cytosol; GO:0005730,nucleolus; GO:0005681,spliceosomal complex; GO:0005524,ATP binding; GO:0004004,ATP-dependent RNA helicase activity; GO:0003723,RNA binding; GO:0006397,mRNA processing; GO:0006396,RNA processing; GO:0008380,RNA splicing
Capana10g001336	10.5251	236.791	4.49439	3.0345e-27	up	GO:0102805,codeine O-demethylase activity; GO:0046872,metal ion binding; GO:0008168,methyltransferase activity; GO:0102803,thebane O-demethylase activity; GO:0009820,alkaloid metabolic process
Capana10g001263	3125.02	17768.7	2.50779	3.0951e-27	up	GO:0008289,lipid binding; GO:0006869,lipid transport
Capana09g001569	68.2343	1233.99	4.16645	3.47844e-27	up	GO:0048046,apoplast; GO:0005507,copper ion binding; GO:0052716,hydroquinone:oxygen oxidoreductase activity; GO:0016491,oxidoreductase activity; GO:0016722,oxidoreductase activity, oxidizing metal ions; GO:0009809,lignin biosynthetic process; GO:0046274,lignin catabolic process; GO:0009834,plant-type secondary cell wall biogenesis
Capana11g001013	312.42	1266.37	2.01714	4.01774e-27	up	GO:0005887,integral component of plasma membrane; GO:0005886,plasma membrane; GO:0015301,anion:anion antiporter activity; GO:0080139,borate efflux transmembrane transporter activity; GO:0005452,inorganic anion exchanger activity; GO:0046713,borate transport; GO:0080029,cellular response to boron-containing substance levels; GO:0051453,regulation of intracellular pH
Capana06g002508	791.773	4260.77	2.42866	5.22328e-27	up	GO:0005737,cytoplasm; GO:0005634,nucleus; GO:0042742,defense response to bacterium; GO:0050832,defense response to fungus
Capana12g000479	5768.35	27406.1	2.24851	5.43978e-27	up	GO:0005739,mitochondrion; GO:0004375,glycine dehydrogenase (decarboxylating) activity; GO:0006546,glycine catabolic process
Capana02g003512	297.095	1261.51	2.08667	5.52965e-27	up	GO:0009507,chloroplast; GO:0005739,mitochondrion; GO:0046872,metal ion binding; GO:0042586,peptide deformylase activity; GO:0043686,co-translational protein modification; GO:0031365,N-terminal protein amino acid modification; GO:0018206,peptidyl-methionine modification; GO:0006412,translation
Capana00g000845	1149.88	2818.32	1.29276	5.80314e-27	up	--
Capana01g001242	21.6033	265.371	3.62551	5.88088e-27	up	GO:0005634,nucleus; GO:0007049,cell cycle; GO:0051301,cell division
Capana01g003600	523.46	1475.27	1.49243	6.25258e-27	up	--
Capana04g000906	1524.72	3101.78	1.02511	6.83964e-27	up	GO:0005789,endoplasmic reticulum membrane; GO:0005768,endosome; GO:0005794,Golgi apparatus; GO:0000139,Golgi membrane; GO:0016021,integral component of membrane; GO:0005886,plasma membrane; GO:0005802,trans-Golgi network; GO:0005524,ATP binding; GO:0000287,magnesium ion binding; GO:0005548,phospholipid transporter activity; GO:0004012,phospholipid-translocating ATPase activity; GO:0048194,Golgi v…
Capana09g002303	351.586	1109.92	1.65928	7.50148e-27	up	GO:0009507,chloroplast; GO:0009534,chloroplast thylakoid; GO:0009543,chloroplast thylakoid lumen; GO:0009535,chloroplast thylakoid membrane; GO:0009579,thylakoid; GO:0003755,peptidyl-prolyl cis-trans isomerase activity
Capana12g002795	10.9984	214.322	4.2524	9.65699e-27	up	--
Capana03g001431	710.073	1594.8	1.16905	1.04542e-26	up	--
Capana01g002230	155.153	874.202	2.49902	1.1711e-26	up	GO:0009707,chloroplast outer membrane; GO:0102996,beta,beta digalactosyldiacylglycerol galactosyltransferase activity; GO:0008422,beta-glucosidase activity; GO:0046480,galactolipid galactosyltransferase activity; GO:0005975,carbohydrate metabolic process; GO:1901657,glycosyl compound metabolic process
Capana00g004368	229.946	1021.12	2.15315	1.2228e-26	up	--
Capana12g001307	2934.53	6017.56	1.03581	1.27336e-26	up	GO:0005618,cell wall; GO:0005829,cytosol; GO:0005634,nucleus; GO:0005886,plasma membrane; GO:0009506,plasmodesma; GO:0005524,ATP binding
Capana11g001275	0	1138.37	12.727	1.30852e-26	up	--
Capana04g000489	731.618	2450.52	1.74539	1.32667e-26	up	GO:0048046,apoplast; GO:0005737,cytoplasm; GO:0005615,extracellular space; GO:0004869,cysteine-type endopeptidase inhibitor activity; GO:0004867,serine-type endopeptidase inhibitor activity
Capana09g001187	951.668	2291.6	1.26766	1.64226e-26	up	GO:0005634,nucleus; GO:0003713,transcription coactivator activity; GO:0030154,cell differentiation; GO:0006974,cellular response to DNA damage stimulus; GO:0071217,cellular response to external biotic stimulus; GO:0009793,embryo development ending in seed dormancy; GO:0009908,flower development; GO:0010393,galacturonan metabolic process; GO:0010073,meristem maintenance; GO:0010192,mucilage biosyn…
Capana00g001638	246.87	1811.9	2.87662	1.91502e-26	up	--
Capana03g001348	492.617	1178.88	1.25909	2.01351e-26	up	GO:0009507,chloroplast; GO:0009570,chloroplast stroma; GO:0005829,cytosol; GO:0009295,nucleoid; GO:0009508,plastid chromosome; GO:0003676,nucleic acid binding
Capana05g000298	341.664	1074.05	1.65167	2.32641e-26	up	--
Capana06g002161	10.5104	271.787	4.65068	2.75228e-26	up	--
Capana05g000873	236.736	1212.64	2.35779	2.90951e-26	up	GO:0005576,extracellular region; GO:0005773,vacuole; GO:0003993,acid phosphatase activity; GO:0046872,metal ion binding
Capana08g001329	732.659	4112.95	2.48962	2.94649e-26	up	GO:0005737,cytoplasm; GO:0004124,cysteine synthase activity; GO:0016740,transferase activity; GO:0006535,cysteine biosynthetic process from serine
Capana01g000386	2185.29	5403.05	1.30621	2.96669e-26	up	--
Capana01g002624	1687.43	4024.8	1.25427	2.99685e-26	up	GO:0005737,cytoplasm; GO:0005794,Golgi apparatus; GO:0005886,plasma membrane; GO:0009506,plasmodesma; GO:0005774,vacuolar membrane; GO:0005773,vacuole; GO:0045549,9-cis-epoxycarotenoid dioxygenase activity; GO:0046872,metal ion binding; GO:0016121,carotene catabolic process; GO:0016118,carotenoid catabolic process; GO:0016124,xanthophyll catabolic process
Capana07g001189	930.165	2192.37	1.23859	3.41979e-26	up	GO:0009570,chloroplast stroma; GO:0004345,glucose-6-phosphate dehydrogenase activity; GO:0050661,NADP binding; GO:0006006,glucose metabolic process; GO:0009051,pentose-phosphate shunt, oxidative branch
Capana01g004463	236.693	869.576	1.87663	4.14266e-26	up	GO:0005737,cytoplasm; GO:0033588,Elongator holoenzyme complex; GO:0005634,nucleus; GO:0005524,ATP binding; GO:0005516,calmodulin binding; GO:0080178,5-carbamoylmethyl uridine residue modification; GO:0006357,regulation of transcription by RNA polymerase II; GO:0006351,transcription, DNA-templated; GO:0006400,tRNA modification
Capana08g001901	68.1119	483.629	2.84001	4.8493e-26	up	--
Capana06g000861	551.899	1336.87	1.27664	5.38602e-26	up	GO:0016021,integral component of membrane
Capana03g000960	1675.09	4505.79	1.42716	5.93677e-26	up	GO:0005737,cytoplasm; GO:0005730,nucleolus; GO:0005524,ATP binding; GO:0004004,ATP-dependent RNA helicase activity; GO:0003723,RNA binding; GO:0010501,RNA secondary structure unwinding
Capana06g001335	9.82199	324.295	5.06238	6.54115e-26	up	--
Capana12g000930	72.4281	872.896	3.58254	6.66514e-26	up	GO:0005634,nucleus; GO:0003700,DNA binding transcription factor activity; GO:0046983,protein dimerization activity; GO:0000977,RNA polymerase II regulatory region sequence-specific DNA binding; GO:0030154,cell differentiation; GO:0009908,flower development; GO:0009910,negative regulation of flower development; GO:0010221,negative regulation of vernalization response; GO:0045944,positive regulatio…
Capana11g001624	1615.52	4401.71	1.44676	9.70091e-26	up	GO:0009507,chloroplast; GO:0009570,chloroplast stroma; GO:0004556,alpha-amylase activity; GO:0103025,alpha-amylase activity (releasing maltohexaose); GO:0005509,calcium ion binding; GO:0005983,starch catabolic process
Capana01g001821	2488.46	5739.26	1.20496	1.03141e-25	up	GO:0005886,plasma membrane; GO:0031418,L-ascorbic acid binding; GO:0046872,metal ion binding; GO:0048244,phytanoyl-CoA dioxygenase activity; GO:0006631,fatty acid metabolic process
Capana04g000152	6411.95	18903.5	1.55982	1.03483e-25	up	--
Capana05g001141	8.90164	185.495	4.36874	1.07587e-25	up	GO:0005634,nucleus; GO:0003700,DNA binding transcription factor activity; GO:0046872,metal ion binding; GO:0043565,sequence-specific DNA binding; GO:0009908,flower development; GO:0006355,regulation of transcription, DNA-templated; GO:0006351,transcription, DNA-templated
Capana08g002819	24.9838	396.303	4.00177	1.21927e-25	up	GO:0050660,flavin adenine dinucleotide binding; GO:0004497,monooxygenase activity; GO:0004499,N,N-dimethylaniline monooxygenase activity; GO:0050661,NADP binding; GO:0071456,cellular response to hypoxia; GO:0009870,defense response signaling pathway, resistance gene-dependent; GO:0010204,defense response signaling pathway, resistance gene-independent; GO:0042742,defense response to bacterium; GO:…
Capana09g001643	3118.1	9916.87	1.66962	1.23631e-25	up	GO:0009570,chloroplast stroma; GO:0042132,fructose 1,6-bisphosphate 1-phosphatase activity; GO:0046872,metal ion binding; GO:0019253,reductive pentose-phosphate cycle
Capana08g001111	1896.01	4387.79	1.20976	1.40273e-25	up	--
Capana03g003623	2913.29	7766.87	1.41474	1.91177e-25	up	GO:0035061,interchromatin granule; GO:0016607,nuclear speck; GO:0005634,nucleus; GO:0005681,spliceosomal complex; GO:0003729,mRNA binding; GO:0006397,mRNA processing; GO:0008380,RNA splicing
Capana10g002192	2262.47	4711.13	1.05878	1.97689e-25	up	GO:0005829,cytosol; GO:0005720,nuclear heterochromatin; GO:0005634,nucleus; GO:0046872,metal ion binding; GO:0061630,ubiquitin protein ligase activity; GO:0010216,maintenance of DNA methylation; GO:1902553,positive regulation of catalase activity; GO:0016567,protein ubiquitination; GO:0090308,regulation of methylation-dependent chromatin silencing
Capana05g000506	1441.35	4591.79	1.67233	2.05889e-25	up	GO:0016020,membrane; GO:0005524,ATP binding; GO:0031072,heat shock protein binding; GO:0046872,metal ion binding; GO:0051082,unfolded protein binding; GO:0006457,protein folding; GO:0009408,response to heat
Capana01g002884	1112.93	2642.46	1.24814	2.20494e-25	up	GO:0005677,chromatin silencing complex; GO:0005634,nucleus; GO:0031519,PcG protein complex; GO:0009506,plasmodesma; GO:0003700,DNA binding transcription factor activity; GO:0018024,histone-lysine N-methyltransferase activity; GO:0003727,single-stranded RNA binding; GO:0006349,regulation of gene expression by genetic imprinting; GO:0006351,transcription, DNA-templated
Capana03g001469	2661.77	22920.1	3.10625	3.02832e-25	up	GO:0004867,serine-type endopeptidase inhibitor activity
Capana10g001389	6316.04	22354.7	1.82371	3.0559e-25	up	GO:0009570,chloroplast stroma; GO:0005524,ATP binding
Capana04g000711	934.884	2145.6	1.19848	3.15909e-25	up	--
Capana12g000664	1408.33	4229.21	1.58755	3.28266e-25	up	GO:0005634,nucleus; GO:0004518,nuclease activity; GO:0043565,sequence-specific DNA binding; GO:0050832,defense response to fungus
Capana10g002150	467.311	1745.08	1.90007	3.67389e-25	up	GO:0070449,elongin complex; GO:0003746,translation elongation factor activity; GO:0006355,regulation of transcription, DNA-templated; GO:0006368,transcription elongation from RNA polymerase II promoter
Capana12g001441	1655.18	4305.18	1.37939	4.71393e-25	up	GO:0009507,chloroplast; GO:0042644,chloroplast nucleoid; GO:0009534,chloroplast thylakoid; GO:0009295,nucleoid; GO:0042646,plastid nucleoid; GO:0009579,thylakoid; GO:0046872,metal ion binding; GO:0004784,superoxide dismutase activity; GO:0055114,oxidation-reduction process
Capana04g001261	2.11535	402.222	7.43301	4.71683e-25	up	--
Capana04g001841	104.51	499.887	2.25246	4.77817e-25	up	--
Capana03g003586	14.5593	216.291	3.88345	5.57748e-25	up	GO:0003677,DNA binding; GO:0003700,DNA binding transcription factor activity; GO:0046872,metal ion binding; GO:0006355,regulation of transcription, DNA-templated; GO:0006351,transcription, DNA-templated
Capana05g001097	1892.37	4072.6	1.10655	6.44332e-25	up	GO:0005737,cytoplasm; GO:0005634,nucleus; GO:0061630,ubiquitin protein ligase activity; GO:0031625,ubiquitin protein ligase binding; GO:0006301,postreplication repair; GO:0070534,protein K63-linked ubiquitination
Capana01g000934	2368.63	7377.02	1.63972	7.10558e-25	up	--
Capana01g002551	32.147	291.99	3.18854	7.78219e-25	up	GO:0004364,glutathione transferase activity; GO:0009734,auxin-activated signaling pathway
Capana03g004610	5570.35	14213.5	1.35166	7.83489e-25	up	GO:0009507,chloroplast; GO:0005524,ATP binding; GO:0016301,kinase activity; GO:0000287,magnesium ion binding; GO:0030955,potassium ion binding; GO:0004743,pyruvate kinase activity
Capana00g003616	39.4615	310.941	2.99272	8.61532e-25	up	--
Capana05g001903	14.9231	191.536	3.67745	8.74245e-25	up	--
Capana02g001239	2410.35	5122.52	1.08753	9.51911e-25	up	GO:0005829,cytosol; GO:0008374,O-acyltransferase activity; GO:0004620,phospholipase activity; GO:0009395,phospholipid catabolic process
Capana09g000538	216.289	1007.16	2.22134	1.0028e-24	up	GO:0005737,cytoplasm; GO:0016020,membrane; GO:0043531,ADP binding; GO:0005524,ATP binding; GO:0009626,plant-type hypersensitive response
Capana01g004052	505.28	2173.84	2.1043	1.02785e-24	up	--
Capana11g002330	143.58	574.165	2.00378	1.0338e-24	up	--
Capana10g000037	56.7768	302.489	2.41977	1.17084e-24	up	GO:0005524,ATP binding; GO:0046316,gluconokinase activity; GO:0016787,hydrolase activity; GO:0046177,D-gluconate catabolic process
Capana03g002115	31.0802	963.474	4.93671	1.27489e-24	up	GO:0000287,magnesium ion binding; GO:0010334,sesquiterpene synthase activity; GO:0051762,sesquiterpene biosynthetic process
Capana11g001227	5890.25	14533.3	1.30324	1.58902e-24	up	GO:0009507,chloroplast; GO:0050521,alpha-glucan, water dikinase activity; GO:0005524,ATP binding; GO:0046872,metal ion binding; GO:0004673,protein histidine kinase activity; GO:0005975,carbohydrate metabolic process
Capana02g002293	3494.77	7160.52	1.03512	1.60461e-24	up	GO:0019172,glyoxalase III activity; GO:0004462,lactoylglutathione lyase activity
Capana12g001178	3125.07	6614.21	1.08142	1.64381e-24	up	GO:0005737,cytoplasm; GO:0005634,nucleus; GO:0005777,peroxisome; GO:0004364,glutathione transferase activity; GO:0004601,peroxidase activity; GO:0006749,glutathione metabolic process; GO:0009407,toxin catabolic process
Capana02g002785	0.808784	482.23	9.07062	1.70024e-24	up	--
Capana11g000778	0	814.961	12.2453	1.70789e-24	up	--
Capana02g002351	55.5651	742.982	3.7281	1.79641e-24	up	GO:0006952,defense response; GO:0009607,response to biotic stimulus
Capana10g002319	211.641	719.63	1.76301	1.88987e-24	up	GO:0005794,Golgi apparatus; GO:0000139,Golgi membrane; GO:0016021,integral component of membrane; GO:0008375,acetylglucosaminyltransferase activity; GO:0015020,glucuronosyltransferase activity; GO:0009826,unidimensional cell growth
Capana12g001683	0	789.596	12.1992	2.13762e-24	up	--
Capana08g001616	4.19264	196.82	5.54839	2.31926e-24	up	GO:0030410,nicotianamine synthase activity; GO:0030418,nicotianamine biosynthetic process
Capana08g002055	59.4172	3777.83	5.99012	2.32939e-24	up	GO:0009897,external side of plasma membrane; GO:0016021,integral component of membrane; GO:0005886,plasma membrane; GO:0005524,ATP binding; GO:0042626,ATPase activity, coupled to transmembrane movement of substances; GO:0015245,fatty acid transmembrane transporter activity; GO:0042803,protein homodimerization activity; GO:0010588,cotyledon vascular tissue pattern formation; GO:0080051,cutin trans…
Capana03g000443	207.016	609.725	1.55657	2.39555e-24	up	--
Capana09g001330	132.871	663.219	2.32168	2.45537e-24	up	--
Capana06g002664	147.229	1206.28	3.03899	2.51124e-24	up	GO:0016021,integral component of membrane; GO:0016020,membrane; GO:0005375,copper ion transmembrane transporter activity; GO:0006825,copper ion transport; GO:0048235,pollen sperm cell differentiation; GO:0048364,root development
Capana09g000645	2200.93	5591.98	1.34506	2.56343e-24	up	GO:0009507,chloroplast; GO:0005829,cytosol; GO:0022625,cytosolic large ribosomal subunit; GO:0005730,nucleolus; GO:0009506,plasmodesma; GO:0005773,vacuole; GO:0003723,RNA binding; GO:0019843,rRNA binding; GO:0003735,structural constituent of ribosome; GO:0000027,ribosomal large subunit assembly; GO:0006412,translation
Capana01g000189	22.2169	211.101	3.23736	2.91172e-24	up	--
Capana05g001269	45.5292	306.792	2.73986	2.91511e-24	up	--
Capana03g000114	347.712	1017.06	1.54844	2.95483e-24	up	--
Capana07g002086	387.106	1905.84	2.3019	3.00393e-24	up	--
Capana03g000601	7584.59	19965.3	1.39641	3.0483e-24	up	GO:0005789,endoplasmic reticulum membrane; GO:0016021,integral component of membrane; GO:0005509,calcium ion binding; GO:0030246,carbohydrate binding; GO:0051082,unfolded protein binding; GO:0006457,protein folding
Capana01g000697	3335.78	8118.09	1.28293	3.29258e-24	up	GO:0005737,cytoplasm; GO:0005783,endoplasmic reticulum; GO:0005789,endoplasmic reticulum membrane; GO:0016021,integral component of membrane; GO:0005635,nuclear envelope; GO:0006983,ER overload response; GO:0043066,negative regulation of apoptotic process; GO:0043069,negative regulation of programmed cell death; GO:0009414,response to water deprivation; GO:0000038,very long-chain fatty acid metab…
Capana03g000445	2469.6	9650.45	1.96676	3.41467e-24	up	--
Capana12g000077	22.8102	215.71	3.2504	3.44256e-24	up	GO:0016020,membrane; GO:0020037,heme binding; GO:0005506,iron ion binding; GO:0016709,oxidoreductase activity, acting on paired donors, with incorporation or reduction of molecular oxygen, NAD(P)H as one donor, and incorporation of one atom of oxygen; GO:0044550,secondary metabolite biosynthetic process
Capana02g001446	786.346	1793.92	1.19022	3.83631e-24	up	GO:0009507,chloroplast; GO:0009295,nucleoid; GO:0005634,nucleus; GO:0009508,plastid chromosome; GO:0000427,plastid-encoded plastid RNA polymerase complex; GO:0090228,positive regulation of red or far-red light signaling pathway; GO:0045893,positive regulation of transcription, DNA-templated; GO:0009585,red, far-red light phototransduction; GO:0009637,response to blue light; GO:0010218,response to…
Capana01g002050	12234.9	47427	1.95477	3.84938e-24	up	--
Capana12g002030	56.8048	499.889	3.12551	3.94969e-24	up	--
Capana03g004532	3.58921	368.053	6.67285	3.957e-24	up	GO:0005783,endoplasmic reticulum; GO:0005789,endoplasmic reticulum membrane; GO:0016021,integral component of membrane; GO:0005524,ATP binding; GO:0051740,ethylene binding; GO:0038199,ethylene receptor activity; GO:0046872,metal ion binding; GO:0000155,phosphorelay sensor kinase activity; GO:0004674,protein serine/threonine kinase activity; GO:0004872,NA; GO:0010105,negative regulation of ethylen…
Capana00g004184	6869.84	15164.3	1.14248	4.07714e-24	up	--
Capana10g001685	66.6475	5447.82	6.357	4.44176e-24	up	GO:0009570,chloroplast stroma; GO:0005524,ATP binding; GO:0042802,identical protein binding
Capana06g000933	302.714	1530.73	2.3347	4.62532e-24	up	GO:0005634,nucleus; GO:0000981,RNA polymerase II transcription factor activity, sequence-specific DNA binding; GO:0043565,sequence-specific DNA binding; GO:0001135,transcription factor activity, RNA polymerase II transcription factor recruiting; GO:0044212,transcription regulatory region DNA binding; GO:0030154,cell differentiation; GO:0006357,regulation of transcription by RNA polymerase II; GO:…
Capana12g002833	719.578	1601.74	1.15521	4.93249e-24	up	GO:0009507,chloroplast; GO:0009570,chloroplast stroma; GO:0005739,mitochondrion; GO:0008047,enzyme activator activity
Capana04g001808	1385.4	3828.78	1.46703	5.27485e-24	up	--
Capana01g002607	766.498	2280.7	1.57195	5.29354e-24	up	GO:0009570,chloroplast stroma; GO:0044183,protein binding involved in protein folding; GO:0061077,chaperone-mediated protein folding
Capana11g001602	614.151	1520.93	1.30741	5.47307e-24	up	GO:0042644,chloroplast nucleoid; GO:0009658,chloroplast organization; GO:0006355,regulation of transcription, DNA-templated
Capana08g002158	1077.81	2333.17	1.113	5.47686e-24	up	GO:0005783,endoplasmic reticulum; GO:0005789,endoplasmic reticulum membrane; GO:0005794,Golgi apparatus; GO:0016021,integral component of membrane; GO:0005886,plasma membrane; GO:0005774,vacuolar membrane; GO:0005773,vacuole; GO:0004040,amidase activity; GO:0103073,anandamide amidohydrolase activity; GO:0047412,N-(long-chain-acyl)ethanolamine deacylase activity; GO:0102077,oleamide hydrolase acti…
Capana06g001499	503.883	1223.2	1.28164	5.60914e-24	up	GO:0005777,peroxisome; GO:0005524,ATP binding; GO:0004631,phosphomevalonate kinase activity; GO:0019287,isopentenyl diphosphate biosynthetic process, mevalonate pathway; GO:0016126,sterol biosynthetic process
Capana03g000054	1827.18	3828.15	1.06681	6.07216e-24	up	GO:0009507,chloroplast; GO:0009509,chromoplast; GO:0016705,oxidoreductase activity, acting on paired donors, with incorporation or reduction of molecular oxygen; GO:0016117,carotenoid biosynthetic process; GO:0009635,response to herbicide
Capana03g000825	4244.28	10550.2	1.31366	6.99314e-24	up	GO:0043022,ribosome binding; GO:0003746,translation elongation factor activity; GO:0003743,translation initiation factor activity; GO:0045901,positive regulation of translational elongation; GO:0045905,positive regulation of translational termination; GO:0006452,translational frameshifting
Capana07g002508	3194.98	8959.28	1.48758	7.10036e-24	up	--
Capana08g000304	1316.8	2783.14	1.08011	7.54394e-24	up	GO:0005829,cytosol; GO:0004130,cytochrome-c peroxidase activity; GO:0020037,heme binding; GO:0016688,L-ascorbate peroxidase activity; GO:0046872,metal ion binding; GO:0004601,peroxidase activity; GO:0034599,cellular response to oxidative stress; GO:0042744,hydrogen peroxide catabolic process; GO:0000302,response to reactive oxygen species; GO:0009845,seed germination; GO:0010431,seed maturation
Capana09g001881	3116.73	11194.7	1.84518	9.39304e-24	up	GO:0009507,chloroplast; GO:0005829,cytosol; GO:0004130,cytochrome-c peroxidase activity; GO:0020037,heme binding; GO:0016688,L-ascorbate peroxidase activity; GO:0046872,metal ion binding; GO:0034599,cellular response to oxidative stress; GO:0042744,hydrogen peroxide catabolic process; GO:0006979,response to oxidative stress; GO:0000302,response to reactive oxygen species
Capana12g000145	1576.15	3796.47	1.26844	9.99582e-24	up	--
Capana00g003749	1389.33	6044.75	2.12147	1.01434e-23	up	--
Capana03g001123	1318.31	3037.92	1.20398	1.08325e-23	up	GO:0005634,nucleus; GO:0005524,ATP binding; GO:0003677,DNA binding; GO:0004674,protein serine/threonine kinase activity; GO:0006974,cellular response to DNA damage stimulus; GO:0051321,meiotic cell cycle
Capana08g001614	48.1516	417.533	3.10316	1.15611e-23	up	GO:0005634,nucleus; GO:0003700,DNA binding transcription factor activity; GO:0045735,nutrient reservoir activity; GO:0046982,protein heterodimerization activity; GO:0043565,sequence-specific DNA binding; GO:0009267,cellular response to starvation; GO:0006971,hypotonic response; GO:2000693,positive regulation of seed maturation; GO:0045893,positive regulation of transcription, DNA-templated; GO:00…
Capana02g001676	561.615	1436.11	1.35471	1.26411e-23	up	GO:0016021,integral component of membrane; GO:0005886,plasma membrane; GO:0005524,ATP binding; GO:0004674,protein serine/threonine kinase activity; GO:0004702,signal transducer, downstream of receptor, with serine/threonine kinase activity
Capana04g002600	964.929	2701.71	1.48655	1.49978e-23	up	GO:0005737,cytoplasm
Capana05g002425	746.937	1859.64	1.31653	1.50379e-23	up	GO:0009507,chloroplast; GO:0009570,chloroplast stroma; GO:0031071,cysteine desulfurase activity; GO:0030170,pyridoxal phosphate binding; GO:0009000,selenocysteine lyase activity; GO:0006534,cysteine metabolic process; GO:0018283,iron incorporation into metallo-sulfur cluster; GO:0010269,response to selenium ion; GO:0001887,selenium compound metabolic process; GO:0006790,sulfur compound metabolic …
Capana05g002533	433.508	1470.39	1.76446	1.52428e-23	up	--
Capana02g000114	552.854	1260.79	1.19069	1.58271e-23	up	GO:0043680,filiform apparatus; GO:0016021,integral component of membrane; GO:0005622,intracellular; GO:0016020,membrane; GO:0005886,plasma membrane; GO:0009506,plasmodesma; GO:0005524,ATP binding; GO:0004672,protein kinase activity; GO:0004674,protein serine/threonine kinase activity; GO:0009738,abscisic acid-activated signaling pathway; GO:0009742,brassinosteroid mediated signaling pathway; GO:0…
Capana01g000037	807.14	1782.89	1.14154	1.59522e-23	up	GO:0005576,extracellular region; GO:0003993,acid phosphatase activity; GO:0046872,metal ion binding
Capana11g000843	0	671.416	11.9655	1.63946e-23	up	GO:0016021,integral component of membrane; GO:0005524,ATP binding; GO:0016887,ATPase activity
Capana01g001280	334.381	980.243	1.54949	2.06329e-23	up	GO:0005794,Golgi apparatus; GO:0000139,Golgi membrane; GO:0016021,integral component of membrane; GO:0048531,beta-1,3-galactosyltransferase activity; GO:0006486,protein glycosylation
Capana10g000415	988.95	2702.12	1.44952	2.17966e-23	up	--
Capana02g003364	654.89	1440.04	1.13492	2.49765e-23	up	--
Capana02g002396	1699.42	4281.72	1.33353	2.75132e-23	up	GO:0009941,chloroplast envelope; GO:0009570,chloroplast stroma; GO:0051537,2 iron, 2 sulfur cluster binding; GO:0015297,antiporter activity; GO:0009055,electron transfer activity; GO:0046872,metal ion binding; GO:0015035,protein disulfide oxidoreductase activity; GO:0006812,cation transport; GO:0045454,cell redox homeostasis
Capana06g002663	4869.03	10241.8	1.07272	2.76082e-23	up	GO:0009941,chloroplast envelope; GO:0009534,chloroplast thylakoid; GO:0016021,integral component of membrane; GO:0050833,pyruvate transmembrane transporter activity; GO:0006849,plasma membrane pyruvate transport
Capana03g000096	2.11535	207.803	6.46605	2.77258e-23	up	--
Capana02g003479	641.234	1992.21	1.6375	3.22206e-23	up	GO:0016021,integral component of membrane; GO:0005886,plasma membrane; GO:0015079,potassium ion transmembrane transporter activity
Capana09g001161	108.474	787.38	2.86808	3.8183e-23	up	GO:0005634,nucleus; GO:0003677,DNA binding; GO:0003700,DNA binding transcription factor activity; GO:0042802,identical protein binding; GO:0010313,phytochrome binding; GO:0046983,protein dimerization activity; GO:0015995,chlorophyll biosynthetic process; GO:0009740,gibberellic acid mediated signaling pathway; GO:0006783,heme biosynthetic process; GO:0009959,negative gravitropism; GO:0010100,negat…
Capana08g001351	236.305	744.673	1.65537	3.86641e-23	up	--
Capana12g002727	373.66	2275.57	2.6053	3.91e-23	up	GO:0005524,ATP binding; GO:0004672,protein kinase activity; GO:0004842,ubiquitin-protein transferase activity
Capana05g000204	1347.01	3241.73	1.26703	3.92165e-23	up	GO:0071011,precatalytic spliceosome; GO:0006397,mRNA processing; GO:0010226,response to lithium ion; GO:0009651,response to salt stress; GO:0008380,RNA splicing
Capana01g000487	124.428	954.163	2.94613	3.93015e-23	up	GO:0005789,endoplasmic reticulum membrane; GO:0016021,integral component of membrane; GO:0016020,membrane; GO:0016711,flavonoid 3'-monooxygenase activity; GO:0020037,heme binding; GO:0005506,iron ion binding; GO:0009813,flavonoid biosynthetic process; GO:0009733,response to auxin; GO:0044550,secondary metabolite biosynthetic process
Capana02g000122	1393.41	3347.72	1.26471	4.07379e-23	up	GO:0009507,chloroplast; GO:0009941,chloroplast envelope; GO:0009570,chloroplast stroma; GO:0009533,chloroplast stromal thylakoid; GO:0009534,chloroplast thylakoid; GO:0009535,chloroplast thylakoid membrane; GO:0009523,photosystem II; GO:0009579,thylakoid; GO:0031977,thylakoid lumen; GO:0015979,photosynthesis; GO:0009657,plastid organization; GO:0006461,NA; GO:0046686,response to cadmium ion; GO:0…
Capana06g001897	1329.23	3809.33	1.51841	4.27752e-23	up	--
Capana02g003143	9.4425	179.24	4.25776	4.98356e-23	up	GO:0005789,endoplasmic reticulum membrane; GO:0016021,integral component of membrane; GO:0102811,geraniol 10-hydroxylase activity; GO:0020037,heme binding; GO:0005506,iron ion binding; GO:0016709,oxidoreductase activity, acting on paired donors, with incorporation or reduction of molecular oxygen, NAD(P)H as one donor, and incorporation of one atom of oxygen; GO:0016099,monoterpenoid biosynthetic…
Capana00g004443	19530.1	46703.5	1.2579	5.58109e-23	up	--
Capana02g001015	566.373	1321.75	1.22088	6.60504e-23	up	--
Capana01g002816	111.125	613.04	2.45977	7.26039e-23	up	GO:0016758,transferase activity, transferring hexosyl groups; GO:0008152,metabolic process
Capana10g000195	4288.3	9066.6	1.08003	7.34796e-23	up	--
Capana11g002272	2393.85	8701.65	1.86242	7.48042e-23	up	GO:0009507,chloroplast; GO:0009941,chloroplast envelope; GO:0009570,chloroplast stroma; GO:0009534,chloroplast thylakoid; GO:0022626,cytosolic ribosome; GO:0016020,membrane; GO:0004742,dihydrolipoyllysine-residue acetyltransferase activity; GO:0006086,acetyl-CoA biosynthetic process from pyruvate; GO:0006096,glycolytic process
Capana06g002913	9.02677	384.663	5.37576	8.60763e-23	up	--
Capana00g000937	3293.55	7436.86	1.17517	9.09425e-23	up	--
Capana06g002146	2390.16	5185.71	1.11749	9.19032e-23	up	GO:0005829,cytosol; GO:0019898,extrinsic component of membrane; GO:0005794,Golgi apparatus; GO:0016020,membrane; GO:0032585,multivesicular body membrane; GO:0030904,retromer complex; GO:0035091,phosphatidylinositol binding; GO:0005543,phospholipid binding; GO:0046982,protein heterodimerization activity; GO:0032502,developmental process; GO:0006897,endocytosis; GO:0045324,late endosome to vacuole …
Capana00g003454	28.0419	208.34	2.89586	9.53751e-23	up	--
Capana10g001857	433.649	1106.89	1.35106	1.02488e-22	up	--
Capana10g000168	15912	32425.7	1.02709	1.05695e-22	up	--
Capana09g000756	506.535	1100.73	1.12002	1.06017e-22	up	GO:0005634,nucleus; GO:0009294,DNA mediated transformation; GO:0045931,positive regulation of mitotic cell cycle; GO:0006355,regulation of transcription, DNA-templated; GO:0048364,root development; GO:0006351,transcription, DNA-templated
Capana05g000099	619.626	1732.53	1.48549	1.12277e-22	up	--
Capana03g000573	615.192	1255.88	1.03037	1.36466e-22	up	GO:0005886,plasma membrane; GO:0005774,vacuolar membrane; GO:0005524,ATP binding; GO:0016887,ATPase activity; GO:0005315,inorganic phosphate transmembrane transporter activity; GO:0005215,transporter activity; GO:0035435,phosphate ion transmembrane transport
Capana03g000729	502.217	1225.57	1.28799	1.44942e-22	up	GO:0051213,dioxygenase activity; GO:0020037,heme binding; GO:0046872,metal ion binding; GO:0004601,peroxidase activity; GO:0006631,fatty acid metabolic process; GO:0010150,leaf senescence; GO:0001676,long-chain fatty acid metabolic process; GO:0031408,oxylipin biosynthetic process; GO:0006979,response to oxidative stress
Capana11g000975	60.923	717.241	3.54786	1.50704e-22	up	GO:0046872,metal ion binding; GO:0004439,phosphatidylinositol-4,5-bisphosphate 5-phosphatase activity; GO:0046856,phosphatidylinositol dephosphorylation
Capana10g001865	1309.99	7522.98	2.52251	1.70904e-22	up	GO:0009535,chloroplast thylakoid membrane; GO:0019898,extrinsic component of membrane; GO:0009654,photosystem II oxygen evolving complex; GO:0005509,calcium ion binding; GO:0015979,photosynthesis
Capana11g000482	1.59854	222.869	7.20155	1.70919e-22	up	GO:0009507,chloroplast; GO:0005840,ribosome; GO:0003735,structural constituent of ribosome; GO:0006412,translation
Capana09g000040	440.859	1225.85	1.47371	1.76454e-22	up	GO:0012505,endomembrane system; GO:0005783,endoplasmic reticulum; GO:0016021,integral component of membrane; GO:0005886,plasma membrane; GO:0009506,plasmodesma; GO:0008289,lipid binding; GO:0046872,metal ion binding; GO:0006869,lipid transport
Capana02g000940	608.097	2882.46	2.24351	1.84681e-22	up	GO:0005789,endoplasmic reticulum membrane; GO:0016021,integral component of membrane; GO:0005506,iron ion binding; GO:0031418,L-ascorbic acid binding; GO:0004656,procollagen-proline 4-dioxygenase activity
Capana02g001558	350.559	966.433	1.46306	1.86828e-22	up	GO:0009507,chloroplast; GO:0009941,chloroplast envelope; GO:0009534,chloroplast thylakoid; GO:0009535,chloroplast thylakoid membrane; GO:0005622,intracellular; GO:0010287,plastoglobule
Capana09g002218	527.365	1278.23	1.27882	1.92381e-22	up	GO:0009507,chloroplast; GO:0009536,plastid; GO:0003677,DNA binding; GO:0003700,DNA binding transcription factor activity; GO:0001053,plastid sigma factor activity; GO:0016987,bacterial sigma factor activity; GO:0071483,cellular response to blue light; GO:0071482,cellular response to light stimulus; GO:0006352,DNA-templated transcription, initiation; GO:0045893,positive regulation of transcription…
Capana05g001892	241.111	818.481	1.76419	1.96566e-22	up	GO:0009570,chloroplast stroma; GO:0005759,mitochondrial matrix; GO:0051537,2 iron, 2 sulfur cluster binding; GO:0008198,ferrous iron binding; GO:0005198,structural molecule activity; GO:0016226,iron-sulfur cluster assembly; GO:0097428,protein maturation by iron-sulfur cluster transfer
Capana01g001612	382.682	1289.96	1.75238	2.02244e-22	up	--
Capana06g001497	7.51439	159.096	4.40583	2.03849e-22	up	--
Capana02g003682	1137.39	2463.74	1.11611	2.05765e-22	up	GO:0009507,chloroplast; GO:0005524,ATP binding; GO:0003677,DNA binding; GO:0004386,helicase activity
Capana03g002344	171.557	748.355	2.12216	2.11156e-22	up	GO:0000139,Golgi membrane; GO:0016021,integral component of membrane; GO:0009506,plasmodesma; GO:0004252,serine-type endopeptidase activity
Capana01g000880	1.11979	258.461	7.75443	2.1129e-22	up	GO:0016021,integral component of membrane; GO:0005886,plasma membrane; GO:0005524,ATP binding; GO:0005516,calmodulin binding; GO:0030246,carbohydrate binding; GO:0004674,protein serine/threonine kinase activity; GO:0045087,innate immune response; GO:0006468,protein phosphorylation; GO:0009620,response to fungus
Capana08g000065	817.702	1760.42	1.10657	2.17006e-22	up	--
Capana03g003937	331.943	1149.06	1.78869	2.23298e-22	up	--
Capana07g002010	2668.09	10671.1	2	2.31572e-22	up	GO:0004364,glutathione transferase activity; GO:0009734,auxin-activated signaling pathway
Capana00g003943	608.115	1353.08	1.15539	2.53005e-22	up	--
Capana07g000553	1090.36	2231.94	1.03443	2.56468e-22	up	GO:0009507,chloroplast; GO:0005634,nucleus; GO:0045036,protein targeting to chloroplast; GO:0006355,regulation of transcription, DNA-templated
Capana12g001164	642.295	1740.18	1.43885	2.76097e-22	up	GO:0016021,integral component of membrane; GO:0046872,metal ion binding; GO:0061630,ubiquitin protein ligase activity; GO:0004842,ubiquitin-protein transferase activity; GO:0043161,proteasome-mediated ubiquitin-dependent protein catabolic process
Capana04g002111	1014.43	2550.46	1.3311	2.84969e-22	up	GO:0009507,chloroplast; GO:0009570,chloroplast stroma; GO:0016020,membrane; GO:0005739,mitochondrion; GO:0004130,cytochrome-c peroxidase activity; GO:0020037,heme binding; GO:0016688,L-ascorbate peroxidase activity; GO:0046872,metal ion binding; GO:0034599,cellular response to oxidative stress; GO:0042744,hydrogen peroxide catabolic process; GO:0009735,response to cytokinin; GO:0000302,response t…
Capana02g002234	0	540.67	11.6529	3.05492e-22	up	GO:0016021,integral component of membrane; GO:0009705,plant-type vacuole membrane; GO:0005886,plasma membrane; GO:0015112,nitrate transmembrane transporter activity; GO:0071249,cellular response to nitrate; GO:0042128,nitrate assimilation; GO:0015706,nitrate transport
Capana00g004002	0	547.945	11.6726	3.17907e-22	up	--
Capana01g000118	588.82	1697.84	1.52881	3.3037e-22	up	--
Capana03g002050	759.327	1898.9	1.32443	3.322e-22	up	GO:0005576,extracellular region; GO:0003993,acid phosphatase activity; GO:0046872,metal ion binding
Capana07g001417	0	535.548	11.6393	3.35207e-22	up	GO:0005737,cytoplasm; GO:0034004,germacradienol synthase activity; GO:0052577,germacrene-D synthase activity; GO:0000287,magnesium ion binding; GO:0016114,terpenoid biosynthetic process
Capana08g000655	409.993	1028.45	1.32769	3.46574e-22	up	--
Capana06g000577	241.73	803.917	1.73363	4.00698e-22	up	GO:0016021,integral component of membrane; GO:0008374,O-acyltransferase activity; GO:0046027,phospholipid:diacylglycerol acyltransferase activity; GO:0006071,glycerol metabolic process; GO:0006629,lipid metabolic process
Capana12g002417	2069.43	6306.58	1.60832	4.01811e-22	up	GO:0005737,cytoplasm; GO:0004512,inositol-3-phosphate synthase activity; GO:0006021,inositol biosynthetic process; GO:0008654,phospholipid biosynthetic process
Capana07g000264	73.8067	426.998	2.5433	4.09692e-22	up	GO:0005634,nucleus; GO:0003677,DNA binding; GO:0003700,DNA binding transcription factor activity; GO:0042802,identical protein binding; GO:0009734,auxin-activated signaling pathway; GO:0010150,leaf senescence; GO:0045892,negative regulation of transcription, DNA-templated; GO:0009733,response to auxin; GO:0006351,transcription, DNA-templated
Capana03g004412	1022.63	2366.3	1.2115	4.12074e-22	up	--
Capana06g000237	319.296	976.104	1.61	4.12475e-22	up	GO:0005783,endoplasmic reticulum; GO:0010168,ER body; GO:0005622,intracellular; GO:0005773,vacuole; GO:0004521,endoribonuclease activity; GO:0033897,ribonuclease T2 activity; GO:0003723,RNA binding; GO:0010507,negative regulation of autophagy; GO:0016075,rRNA catabolic process
Capana07g000366	3610.61	11252.3	1.6403	4.33092e-22	up	GO:0005829,cytosol; GO:0005886,plasma membrane; GO:0009506,plasmodesma; GO:0016157,sucrose synthase activity; GO:0046524,sucrose-phosphate synthase activity; GO:0071836,nectar secretion; GO:0005986,sucrose biosynthetic process
Capana02g002887	6138.45	34148.4	2.47599	4.69755e-22	up	GO:0048046,apoplast; GO:0009570,chloroplast stroma; GO:0009534,chloroplast thylakoid; GO:0022626,cytosolic ribosome; GO:0005739,mitochondrion; GO:0005634,nucleus; GO:0005886,plasma membrane; GO:0010319,stromule; GO:0004372,glycine hydroxymethyltransferase activity; GO:0008266,poly(U) RNA binding; GO:0030170,pyridoxal phosphate binding; GO:0007623,circadian rhythm; GO:0019264,glycine biosynthetic …
Capana12g001380	3978.5	9094.26	1.19301	4.74769e-22	up	--
Capana12g002069	56.667	306.468	2.42568	4.8243e-22	up	GO:0043231,intracellular membrane-bounded organelle; GO:0004519,endonuclease activity; GO:0003723,RNA binding; GO:0009451,RNA modification
Capana02g003665	93.0595	476.047	2.35107	5.10771e-22	up	GO:0005634,nucleus; GO:0003677,DNA binding; GO:0003700,DNA binding transcription factor activity; GO:0000987,proximal promoter sequence-specific DNA binding; GO:0043565,sequence-specific DNA binding; GO:0009653,anatomical structure morphogenesis; GO:0006351,transcription, DNA-templated
Capana01g001387	527.209	1666.29	1.65931	5.31469e-22	up	--
Capana00g001635	1.61757	208.314	6.87422	5.37999e-22	up	--
Capana04g000058	2178.91	6755.19	1.63246	5.42728e-22	up	--
Capana01g001848	64.9072	306.537	2.24123	5.48064e-22	up	--
Capana06g000494	74.1425	580.079	2.95889	5.83348e-22	up	GO:0005829,cytosol; GO:1903600,glutaminase complex; GO:0004359,glutaminase activity; GO:0046982,protein heterodimerization activity; GO:0036381,pyridoxal 5'-phosphate synthase (glutamine hydrolysing) activity; GO:0006541,glutamine metabolic process; GO:0042823,pyridoxal phosphate biosynthetic process; GO:0008614,pyridoxine metabolic process; GO:0042819,vitamin B6 biosynthetic process
Capana02g002705	12.1372	244.869	4.29204	6.14016e-22	up	GO:0005829,cytosol; GO:0005634,nucleus; GO:0005886,plasma membrane; GO:0009536,plastid; GO:0003700,DNA binding transcription factor activity; GO:0035091,phosphatidylinositol binding; GO:0006355,regulation of transcription, DNA-templated; GO:0009620,response to fungus
Capana03g000797	4480.93	16705.5	1.89865	6.31048e-22	up	GO:0009535,chloroplast thylakoid membrane; GO:0016021,integral component of membrane; GO:0009522,photosystem I; GO:0009523,photosystem II; GO:0016168,chlorophyll binding; GO:0046872,metal ion binding; GO:0009765,photosynthesis, light harvesting; GO:0018298,protein-chromophore linkage
Capana01g001493	3681.6	8592.62	1.22266	6.37359e-22	up	GO:0005829,cytosol; GO:0016607,nuclear speck; GO:0005681,spliceosomal complex; GO:0003729,mRNA binding; GO:0000398,mRNA splicing, via spliceosome; GO:0008380,RNA splicing
Capana08g000970	145.244	761.741	2.38426	6.46048e-22	up	--
Capana05g000287	675.174	3372.46	2.32045	7.87152e-22	up	GO:0005524,ATP binding; GO:0004674,protein serine/threonine kinase activity; GO:0009738,abscisic acid-activated signaling pathway
Capana03g000987	4266.88	9024	1.08102	7.90408e-22	up	GO:0009507,chloroplast; GO:0005759,mitochondrial matrix; GO:0005739,mitochondrion; GO:0004029,aldehyde dehydrogenase (NAD) activity; GO:0005524,ATP binding; GO:0046686,response to cadmium ion
Capana09g002065	1496.72	3074.84	1.0392	8.67375e-22	up	GO:0005737,cytoplasm; GO:0061630,ubiquitin protein ligase activity
Capana08g001582	41.867	1076.39	4.69426	9.37435e-22	up	GO:0005634,nucleus; GO:0003700,DNA binding transcription factor activity; GO:0043565,sequence-specific DNA binding; GO:0006355,regulation of transcription, DNA-templated; GO:0006351,transcription, DNA-templated
Capana03g003917	3.35936	239.076	6.08102	1.02369e-21	up	--
Capana03g004346	131.558	1157.24	3.13876	1.56085e-21	up	GO:0005576,extracellular region; GO:0003993,acid phosphatase activity; GO:0046872,metal ion binding; GO:0009846,pollen germination; GO:0009845,seed germination
Capana11g000842	1229.77	2564.17	1.06048	1.71737e-21	up	--
Capana07g002201	5479.14	13640.5	1.31617	1.72875e-21	up	GO:0005730,nucleolus; GO:0005525,GTP binding; GO:0003924,GTPase activity; GO:0042254,ribosome biogenesis
Capana01g001807	9100.75	22506.3	1.30631	1.73359e-21	up	GO:0005829,cytosol; GO:0005634,nucleus; GO:0017091,AU-rich element binding; GO:0003729,mRNA binding; GO:0009738,abscisic acid-activated signaling pathway; GO:0008219,cell death; GO:0006952,defense response; GO:0009693,ethylene biosynthetic process; GO:0010150,leaf senescence; GO:0048255,mRNA stabilization
Capana05g000570	280.478	789.16	1.49483	1.85058e-21	up	GO:0005759,mitochondrial matrix; GO:0005634,nucleus; GO:0016787,hydrolase activity; GO:0046872,metal ion binding; GO:0070403,NAD+ binding; GO:0042742,defense response to bacterium; GO:0031348,negative regulation of defense response
Capana00g002117	1374.82	2879.75	1.06769	1.88548e-21	up	--
Capana02g000984	241.241	824.324	1.775	1.96157e-21	up	--
Capana04g000407	5024.23	13989.3	1.47748	2.00839e-21	up	GO:0005737,cytoplasm; GO:0005524,ATP binding; GO:0016874,ligase activity; GO:0019788,NEDD8 transferase activity; GO:0045116,protein neddylation; GO:0009733,response to auxin
Capana06g001739	214.365	1551.51	2.85558	2.20862e-21	up	GO:0005634,nucleus; GO:0003677,DNA binding; GO:0003700,DNA binding transcription factor activity; GO:0009788,negative regulation of abscisic acid-activated signaling pathway; GO:0009611,response to wounding; GO:0006351,transcription, DNA-templated
Capana10g000850	3.27821	151.53	5.51931	2.24658e-21	up	GO:0005794,Golgi apparatus; GO:0016021,integral component of membrane; GO:0016413,O-acetyltransferase activity; GO:0071554,cell wall organization or biogenesis
Capana01g004481	450.129	1480.84	1.71838	2.33626e-21	up	--
Capana01g004097	7205.61	22124.4	1.61849	2.51021e-21	up	GO:0005737,cytoplasm; GO:0003839,gamma-glutamylcyclotransferase activity; GO:0016829,lyase activity; GO:0006751,glutathione catabolic process; GO:0046686,response to cadmium ion; GO:0010288,response to lead ion
Capana03g003574	71.7523	453.267	2.66421	2.53406e-21	up	GO:0009860,pollen tube growth; GO:0016567,protein ubiquitination
Capana03g004083	13778.9	43595.1	1.66172	2.58717e-21	up	GO:0004013,adenosylhomocysteinase activity; GO:0051287,NAD binding; GO:0006730,one-carbon metabolic process; GO:0019510,S-adenosylhomocysteine catabolic process
Capana11g001894	470.252	1237.49	1.39702	2.60773e-21	up	GO:0009507,chloroplast; GO:0009840,chloroplastic endopeptidase Clp complex; GO:0003677,DNA binding
Capana05g000810	76.2704	356.733	2.2227	2.67854e-21	up	GO:0016021,integral component of membrane
Capana10g000310	736.999	2179.67	1.56619	2.77047e-21	up	--
Capana00g001042	1.61757	183.211	6.68745	3.02273e-21	up	--
Capana11g001485	357.594	883.215	1.30696	3.10079e-21	up	GO:0005635,nuclear envelope; GO:0005643,nuclear pore; GO:0005215,transporter activity; GO:0045087,innate immune response; GO:0006406,mRNA export from nucleus; GO:0006611,protein export from nucleus; GO:0006606,protein import into nucleus; GO:0000055,ribosomal large subunit export from nucleus; GO:0000056,ribosomal small subunit export from nucleus; GO:0009627,systemic acquired resistance
Capana08g000941	0	452.263	11.3956	3.18241e-21	up	--
Capana12g002881	123.017	711.338	2.53298	3.6626e-21	up	--
Capana07g000034	949.472	1912.28	1.01167	4.51417e-21	up	--
Capana04g000078	122.578	744.725	2.59856	4.83427e-21	up	GO:0005634,nucleus; GO:0003677,DNA binding; GO:0003700,DNA binding transcription factor activity; GO:0006355,regulation of transcription, DNA-templated; GO:0006351,transcription, DNA-templated
Capana07g001874	83.3781	555.655	2.74092	4.83466e-21	up	GO:0016021,integral component of membrane; GO:0020037,heme binding; GO:0005506,iron ion binding; GO:0004497,monooxygenase activity; GO:0016705,oxidoreductase activity, acting on paired donors, with incorporation or reduction of molecular oxygen
Capana12g000469	140.469	460.247	1.71089	4.99748e-21	up	GO:0005840,ribosome; GO:0003735,structural constituent of ribosome; GO:0006412,translation
Capana01g000888	326.281	981.308	1.59198	5.58376e-21	up	GO:0009507,chloroplast; GO:0009941,chloroplast envelope; GO:0009706,chloroplast inner membrane; GO:0016021,integral component of membrane; GO:0016020,membrane; GO:1901974,glycerate transmembrane transporter activity; GO:0043879,glycolate transmembrane transporter activity; GO:0009658,chloroplast organization; GO:1901975,glycerate transmembrane transport; GO:0097339,glycolate transmembrane transpo…
Capana11g000013	510.368	3514.05	2.7847	7.1083e-21	up	GO:0005737,cytoplasm; GO:0004022,alcohol dehydrogenase (NAD) activity; GO:0008270,zinc ion binding
Capana01g003112	5381.65	15833.6	1.55695	7.19825e-21	up	GO:0009507,chloroplast; GO:0031177,phosphopantetheine binding; GO:0006633,fatty acid biosynthetic process
Capana09g000751	1134.52	4099.05	1.85393	7.85524e-21	up	--
Capana00g003691	1182.32	5861.15	2.30908	7.88796e-21	up	--
Capana02g002077	576.868	1363.99	1.24039	8.86469e-21	up	GO:0009507,chloroplast; GO:0005829,cytosol; GO:0005634,nucleus; GO:0005886,plasma membrane; GO:0005524,ATP binding; GO:0002238,response to molecule of fungal origin; GO:0006950,response to stress
Capana05g000023	858.787	2649.37	1.62551	9.03915e-21	up	GO:0009507,chloroplast; GO:0009509,chromoplast; GO:0016853,isomerase activity; GO:0016705,oxidoreductase activity, acting on paired donors, with incorporation or reduction of molecular oxygen; GO:0016117,carotenoid biosynthetic process
Capana04g002408	813.985	1631.58	1.00225	9.62872e-21	up	GO:0005634,nucleus; GO:0005886,plasma membrane; GO:0005524,ATP binding; GO:0004675,transmembrane receptor protein serine/threonine kinase activity; GO:0007166,cell surface receptor signaling pathway; GO:0006952,defense response; GO:0006468,protein phosphorylation
Capana03g001342	1093.19	6563.34	2.58627	1.02644e-20	up	GO:0009505,plant-type cell wall; GO:0005524,ATP binding; GO:0003824,catalytic activity; GO:0019887,protein kinase regulator activity; GO:0005975,carbohydrate metabolic process; GO:0006633,fatty acid biosynthetic process; GO:0042128,nitrate assimilation
Capana04g001398	152.961	495.023	1.69408	1.083e-20	up	GO:0004842,ubiquitin-protein transferase activity; GO:0010200,response to chitin
Capana05g000397	1512.43	6693.9	2.14635	1.20511e-20	up	--
Capana03g000006	559.517	1386	1.30857	1.26011e-20	up	--
Capana06g003044	1122.65	3164.83	1.4964	1.32373e-20	up	--
Capana01g001328	51.1683	385.721	2.90702	1.32639e-20	up	GO:0005829,cytosol; GO:0030267,glyoxylate reductase (NADP) activity; GO:0016618,hydroxypyruvate reductase activity; GO:0051287,NAD binding; GO:0009854,oxidative photosynthetic carbon pathway; GO:0009853,photorespiration
Capana02g000175	56.9675	659.732	3.53568	1.38423e-20	up	GO:0005886,plasma membrane; GO:0005524,ATP binding; GO:0005516,calmodulin binding; GO:0030246,carbohydrate binding; GO:0004674,protein serine/threonine kinase activity; GO:0006468,protein phosphorylation; GO:0048544,recognition of pollen
Capana10g002122	5712.59	13491.8	1.24013	1.68934e-20	up	GO:0005886,plasma membrane; GO:0004675,transmembrane receptor protein serine/threonine kinase activity; GO:0007166,cell surface receptor signaling pathway; GO:0006952,defense response; GO:0006468,protein phosphorylation; GO:0007165,signal transduction
Capana00g004881	0	396.664	11.2062	1.73818e-20	up	--
Capana12g000414	19.317	1933.33	6.62755	1.75325e-20	up	GO:0005634,nucleus; GO:0008270,zinc ion binding; GO:0009909,regulation of flower development; GO:0009416,response to light stimulus
Capana08g001859	32.5873	378.608	3.55378	2.33364e-20	up	GO:0052689,carboxylic ester hydrolase activity
Capana00g001423	559.16	3415.34	2.61166	2.52737e-20	up	--
Capana10g001059	778.902	1935.43	1.31473	2.62463e-20	up	GO:0005789,endoplasmic reticulum membrane; GO:0016021,integral component of membrane; GO:0009734,auxin-activated signaling pathway; GO:0009733,response to auxin; GO:0055085,transmembrane transport
Capana08g002306	16.7815	431.737	4.717	2.72912e-20	up	GO:0005618,cell wall; GO:0005576,extracellular region; GO:0005773,vacuole; GO:0008061,chitin binding; GO:0004568,chitinase activity; GO:0016998,cell wall macromolecule catabolic process; GO:0006032,chitin catabolic process; GO:0006952,defense response; GO:0000272,polysaccharide catabolic process
Capana03g003346	198.382	540.073	1.44311	2.75231e-20	up	GO:0005737,cytoplasm; GO:0005634,nucleus; GO:0046872,metal ion binding; GO:0004842,ubiquitin-protein transferase activity; GO:0042742,defense response to bacterium; GO:0009867,jasmonic acid mediated signaling pathway; GO:0009611,response to wounding
Capana00g002726	12.7452	168.317	3.74823	2.84183e-20	up	--
Capana06g000079	878.435	2339.15	1.41347	2.85526e-20	up	--
Capana12g002080	200.771	1100.22	2.45809	3.21394e-20	up	GO:0009507,chloroplast; GO:0005737,cytoplasm; GO:0016791,phosphatase activity; GO:0043621,protein self-association; GO:0006468,protein phosphorylation; GO:0009231,riboflavin biosynthetic process
Capana11g000046	2318.54	6069.15	1.38884	3.66811e-20	up	GO:0005737,cytoplasm; GO:0005622,intracellular; GO:0005525,GTP binding; GO:0003924,GTPase activity; GO:0003746,translation elongation factor activity
Capana05g001831	526.688	1179.03	1.1613	3.67974e-20	up	--
Capana08g002291	858.844	1788.49	1.05968	3.95507e-20	up	GO:0005634,nucleus; GO:0003684,damaged DNA binding; GO:0003887,DNA-directed DNA polymerase activity; GO:0046872,metal ion binding; GO:0006974,cellular response to DNA damage stimulus; GO:0042276,error-prone translesion synthesis; GO:0010224,response to UV-B
Capana07g002359	210.394	1426.95	2.764	4.17738e-20	up	GO:0005829,cytosol; GO:0005739,mitochondrion; GO:0009001,serine O-acetyltransferase activity; GO:0008270,zinc ion binding; GO:0019344,cysteine biosynthetic process; GO:0006535,cysteine biosynthetic process from serine; GO:0046686,response to cadmium ion
Capana07g002408	132.49	634.096	2.26186	4.29237e-20	up	--
Capana00g003778	60.8259	336.862	2.46025	4.48657e-20	up	--
Capana04g000759	329.207	895.528	1.44139	4.59491e-20	up	--
Capana06g002917	1407.94	2820.96	1.0038	5.42603e-20	up	--
Capana05g000600	814.733	2117.6	1.37888	5.54566e-20	up	GO:0009507,chloroplast; GO:0009941,chloroplast envelope; GO:0031969,chloroplast membrane; GO:0009570,chloroplast stroma; GO:0005774,vacuolar membrane; GO:0043621,protein self-association; GO:0003727,single-stranded RNA binding; GO:0006397,mRNA processing; GO:1901918,negative regulation of exoribonuclease activity; GO:0009657,plastid organization; GO:0006417,regulation of translation; GO:0010114,r…
Capana01g000517	42.1838	395.863	3.21288	5.64807e-20	up	--
Capana06g001009	9186.95	21159.1	1.20373	5.67242e-20	up	GO:0005524,ATP binding; GO:0016740,transferase activity; GO:0016567,protein ubiquitination
Capana01g000274	582.692	1375.09	1.23965	6.03563e-20	up	GO:0005739,mitochondrion; GO:0005730,nucleolus; GO:0005524,ATP binding; GO:0004004,ATP-dependent RNA helicase activity; GO:0003723,RNA binding; GO:0009663,plasmodesma organization; GO:0010497,plasmodesmata-mediated intercellular transport; GO:0010501,RNA secondary structure unwinding
Capana05g000010	82.0971	452.622	2.45501	6.19896e-20	up	--
Capana11g001298	0	379.424	11.1426	6.77154e-20	up	GO:0005634,nucleus; GO:0046872,metal ion binding; GO:0016740,transferase activity; GO:0006952,defense response; GO:0043161,proteasome-mediated ubiquitin-dependent protein catabolic process; GO:0043067,regulation of programmed cell death
Capana10g000470	0	356.973	11.054	6.92508e-20	up	GO:0005634,nucleus; GO:0051213,dioxygenase activity; GO:0008198,ferrous iron binding; GO:0032453,histone demethylase activity (H3-K4 specific); GO:0045814,negative regulation of gene expression, epigenetic; GO:0040010,positive regulation of growth rate; GO:0006355,regulation of transcription, DNA-templated; GO:0006351,transcription, DNA-templated
Capana01g003292	2788.62	8328.25	1.57883	7.0391e-20	up	GO:0004364,glutathione transferase activity; GO:0006952,defense response
Capana05g000210	682.519	1654.86	1.27632	7.16584e-20	up	GO:0005737,cytoplasm; GO:0005739,mitochondrion; GO:0005634,nucleus; GO:0016818,hydrolase activity, acting on acid anhydrides, in phosphorus-containing anhydrides; GO:0046872,metal ion binding
Capana12g000359	4.12079	138.084	5.12154	7.35797e-20	up	GO:0005737,cytoplasm; GO:0043531,ADP binding; GO:0005524,ATP binding; GO:0009626,plant-type hypersensitive response; GO:0007165,signal transduction
Capana08g002342	5.45613	224.035	5.28253	7.36547e-20	up	GO:0005783,endoplasmic reticulum; GO:0005789,endoplasmic reticulum membrane; GO:0016021,integral component of membrane; GO:0005886,plasma membrane; GO:0102966,arachidoyl-CoA:1-dodecanol O-acyltransferase activity; GO:0004144,diacylglycerol O-acyltransferase activity; GO:0047196,long-chain-alcohol O-fatty-acyltransferase activity; GO:0103095,wax ester synthase activity; GO:0019432,triglyceride bio…
Capana00g003428	238.965	1001.95	2.07183	7.50855e-20	up	--
Capana06g000941	169.347	593.159	1.80336	8.09967e-20	up	GO:0005829,cytosol; GO:0000159,protein phosphatase type 2A complex; GO:0019888,protein phosphatase regulator activity; GO:0032502,developmental process; GO:0000278,mitotic cell cycle; GO:0070262,peptidyl-serine dephosphorylation; GO:0006470,protein dephosphorylation
Capana02g000074	28.4721	255.179	3.15251	8.3439e-20	up	GO:0005886,plasma membrane; GO:0005524,ATP binding; GO:0005516,calmodulin binding; GO:0030246,carbohydrate binding; GO:0004674,protein serine/threonine kinase activity; GO:0006468,protein phosphorylation; GO:0048544,recognition of pollen
Capana11g001409	351.886	1162.3	1.72573	8.39737e-20	up	GO:0042644,chloroplast nucleoid; GO:0042646,plastid nucleoid; GO:0000427,plastid-encoded plastid RNA polymerase complex; GO:0003677,DNA binding; GO:0010468,regulation of gene expression; GO:0006355,regulation of transcription, DNA-templated; GO:0009642,response to light intensity; GO:0006351,transcription, DNA-templated
Capana00g005089	18109	39051.7	1.10876	8.41558e-20	up	--
Capana03g003780	284.85	803.63	1.49925	9.93067e-20	up	GO:0000419,DNA-directed RNA polymerase V complex; GO:0005654,nucleoplasm; GO:0005634,nucleus; GO:0003677,DNA binding; GO:0043621,protein self-association; GO:0006306,DNA methylation; GO:0070918,production of small RNA involved in gene silencing by RNA; GO:0044030,regulation of DNA methylation
Capana08g001316	2657.71	5776.18	1.12058	1.02001e-19	up	GO:0009507,chloroplast; GO:0009509,chromoplast; GO:0052887,7,9,9'-tricis-neurosporene:quinone oxidoreductase activity; GO:0052886,9,9'-dicis-carotene:quinone oxidoreductase activity; GO:0016719,carotene 7,8-desaturase activity; GO:0052889,9,9'-di-cis-zeta-carotene desaturation to 7,9,7',9'-tetra-cis-lycopene; GO:0016117,carotenoid biosynthetic process
Capana01g001091	0	347.242	11.014	1.06341e-19	up	--
Capana00g001695	872.117	1941.91	1.15304	1.07172e-19	up	--
Capana11g001388	697.488	1541.88	1.14615	1.15947e-19	up	GO:0009507,chloroplast; GO:0003677,DNA binding; GO:0003700,DNA binding transcription factor activity; GO:0001053,plastid sigma factor activity; GO:0016987,bacterial sigma factor activity; GO:0071482,cellular response to light stimulus; GO:0009658,chloroplast organization; GO:0006352,DNA-templated transcription, initiation; GO:2001141,regulation of RNA biosynthetic process; GO:0010114,response to …
Capana09g001957	434.787	1129.15	1.37957	1.2441e-19	up	--
Capana03g002958	90.5914	474.155	2.3816	1.2639e-19	up	GO:0005634,nucleus
Capana01g003745	774.117	1603.98	1.04985	1.27286e-19	up	GO:0005737,cytoplasm; GO:0005634,nucleus; GO:0019005,SCF ubiquitin ligase complex; GO:0005516,calmodulin binding; GO:0004402,histone acetyltransferase activity; GO:0003712,transcription cofactor activity; GO:0031625,ubiquitin protein ligase binding; GO:0008270,zinc ion binding; GO:0009553,embryo sac development; GO:0009555,pollen development; GO:0043161,proteasome-mediated ubiquitin-dependent pro…
Capana01g001716	565.798	2609.76	2.20603	1.30721e-19	up	GO:0009507,chloroplast; GO:0009534,chloroplast thylakoid; GO:0009543,chloroplast thylakoid lumen; GO:0009535,chloroplast thylakoid membrane; GO:0046872,metal ion binding; GO:0009561,megagametogenesis; GO:0048564,photosystem I assembly; GO:0010027,thylakoid membrane organization
Capana00g004947	3878.63	7773.78	1.00344	1.33131e-19	up	--
Capana07g001505	175.498	781.561	2.15439	1.47363e-19	up	--
Capana04g002852	964.196	1938.37	1.00596	1.48419e-19	up	GO:0016021,integral component of membrane; GO:0005886,plasma membrane; GO:0015095,magnesium ion transmembrane transporter activity; GO:0009555,pollen development
Capana08g000894	515.389	1571.61	1.61019	1.51268e-19	up	--
Capana05g001000	740.155	1549.78	1.06705	1.59436e-19	up	GO:0005777,peroxisome; GO:0016874,ligase activity; GO:0006631,fatty acid metabolic process
Capana01g000217	589.334	1228.99	1.06081	1.6052e-19	up	GO:0005829,cytosol; GO:0004633,phosphopantothenoylcysteine decarboxylase activity; GO:0015937,coenzyme A biosynthetic process; GO:0042538,hyperosmotic salinity response; GO:0040008,regulation of growth
Capana08g000099	265.571	886.796	1.73895	1.61565e-19	up	GO:0009626,plant-type hypersensitive response
Capana06g001403	4.67139	131.173	4.84797	1.67594e-19	up	GO:0005634,nucleus; GO:0030154,cell differentiation; GO:0006974,cellular response to DNA damage stimulus; GO:0071217,cellular response to external biotic stimulus; GO:0009908,flower development; GO:0010393,galacturonan metabolic process; GO:0010073,meristem maintenance; GO:0080001,mucilage extrusion from seed coat; GO:0048359,mucilage metabolic process involved in seed coat development; GO:004589…
Capana12g000037	459.417	1012.68	1.14011	1.76225e-19	up	--
Capana10g000873	135.602	619.781	2.1951	1.76807e-19	up	GO:0008792,arginine decarboxylase activity; GO:0006527,arginine catabolic process; GO:0009446,putrescine biosynthetic process; GO:0008295,spermidine biosynthetic process
Capana00g003850	1422.41	2978.68	1.06728	1.81881e-19	up	--
Capana00g004545	178.312	1041.93	2.54718	1.85952e-19	up	--
Capana03g000290	4972.67	14542.7	1.54841	1.98262e-19	up	GO:0009535,chloroplast thylakoid membrane; GO:0016021,integral component of membrane; GO:0009538,photosystem I reaction center; GO:0015979,photosynthesis
Capana03g000658	536.514	1668.09	1.63584	2.02816e-19	up	--
Capana07g002241	210.48	624.166	1.57178	2.0368e-19	up	GO:0005930,axoneme; GO:0097014,ciliary plasm; GO:0030286,dynein complex; GO:0005874,microtubule; GO:0031514,motile cilium; GO:0003774,motor activity; GO:0007017,microtubule-based process; GO:0044458,motile cilium assembly
Capana10g000275	1.84743	189.822	6.71228	2.04234e-19	up	GO:0016021,integral component of membrane; GO:0020037,heme binding; GO:0005506,iron ion binding; GO:0004497,monooxygenase activity; GO:0016705,oxidoreductase activity, acting on paired donors, with incorporation or reduction of molecular oxygen
Capana06g000146	582.827	1332.59	1.19505	2.15133e-19	up	--
Capana02g001725	0.497784	429.308	9.48639	2.36098e-19	up	GO:0005737,cytoplasm; GO:0034004,germacradienol synthase activity; GO:0052577,germacrene-D synthase activity; GO:0000287,magnesium ion binding; GO:0016114,terpenoid biosynthetic process
Capana06g000210	452.725	1217.16	1.42883	2.43556e-19	up	--
Capana04g000694	451.959	2375.05	2.39494	2.65524e-19	up	GO:0005576,extracellular region; GO:0004180,carboxypeptidase activity; GO:0016747,transferase activity, transferring acyl groups other than amino-acyl groups; GO:0019748,secondary metabolic process
Capana02g002891	8.88261	142.847	4.02304	2.70037e-19	up	GO:0016021,integral component of membrane; GO:0005524,ATP binding; GO:0004672,protein kinase activity; GO:0004674,protein serine/threonine kinase activity; GO:0009877,nodulation; GO:0046777,protein autophosphorylation
Capana02g001507	657.63	2039.01	1.63405	2.76022e-19	up	--
Capana03g003413	3.98181	243.591	5.82959	2.77796e-19	up	--
Capana00g003515	285.301	785.625	1.46458	2.81006e-19	up	--
Capana06g000318	113.064	443.963	1.97238	2.85919e-19	up	GO:0009507,chloroplast; GO:0030145,manganese ion binding; GO:0016791,phosphatase activity; GO:0004721,phosphoprotein phosphatase activity
Capana07g000086	159.466	6892.28	5.43233	2.86866e-19	up	GO:0005829,cytosol; GO:0005739,mitochondrion; GO:0016791,phosphatase activity; GO:0016757,transferase activity, transferring glycosyl groups; GO:0005992,trehalose biosynthetic process; GO:0070413,trehalose metabolism in response to stress
Capana10g001385	139.433	1338.3	3.26543	3.06113e-19	up	--
Capana08g000386	1667.38	4713.03	1.49956	3.25418e-19	up	--
Capana03g002919	0	322.76	10.9091	3.42403e-19	up	GO:0005576,extracellular region; GO:0005773,vacuole; GO:0004185,serine-type carboxypeptidase activity; GO:0051603,proteolysis involved in cellular protein catabolic process
Capana11g000072	22.763	420.735	4.18327	3.81176e-19	up	GO:0005783,endoplasmic reticulum; GO:0005789,endoplasmic reticulum membrane; GO:0005794,Golgi apparatus; GO:0000139,Golgi membrane; GO:0016021,integral component of membrane; GO:0015297,antiporter activity; GO:0005464,UDP-xylose transmembrane transporter activity; GO:0008643,carbohydrate transport; GO:0015790,UDP-xylose transmembrane transport
Capana00g003643	286.662	1323.97	2.20356	3.93792e-19	up	--
Capana07g002511	487.577	1114.42	1.19341	4.07337e-19	up	GO:0005777,peroxisome; GO:0005774,vacuolar membrane; GO:0008670,2,4-dienoyl-CoA reductase (NADPH) activity; GO:0006631,fatty acid metabolic process
Capana05g002456	57.7136	268.72	2.21847	4.11308e-19	up	GO:0016021,integral component of membrane; GO:0005886,plasma membrane; GO:0005524,ATP binding; GO:0042626,ATPase activity, coupled to transmembrane movement of substances
Capana00g004561	60.641	399.799	2.73342	4.20844e-19	up	--
Capana03g002826	1420.28	7063.35	2.31389	4.21987e-19	up	GO:0009543,chloroplast thylakoid lumen; GO:0016020,membrane; GO:0004175,endopeptidase activity; GO:0008236,serine-type peptidase activity
Capana10g002316	610.319	1314.09	1.10864	4.29275e-19	up	--
Capana02g000410	383.723	1279.59	1.7388	4.37466e-19	up	GO:0005737,cytoplasm; GO:0005634,nucleus; GO:0003700,DNA binding transcription factor activity; GO:0043565,sequence-specific DNA binding; GO:0044212,transcription regulatory region DNA binding; GO:0006351,transcription, DNA-templated
Capana10g000584	2.05279	186.74	6.47567	4.68355e-19	up	GO:0016324,apical plasma membrane; GO:0009860,pollen tube growth; GO:0040008,regulation of growth
Capana03g003605	1494.09	3663.65	1.2942	4.92853e-19	up	GO:0009507,chloroplast; GO:0009535,chloroplast thylakoid membrane; GO:0016021,integral component of membrane
Capana08g001929	2872.55	6962.09	1.27759	5.25241e-19	up	--
Capana00g001880	968.861	2189.08	1.17693	5.27852e-19	up	--
Capana04g001265	338.056	892.547	1.40341	5.61243e-19	up	GO:0009507,chloroplast; GO:0005524,ATP binding; GO:0008298,intracellular mRNA localization
Capana05g000202	4.46011	413.728	6.52485	5.71454e-19	up	--
Capana02g001381	247.014	944.251	1.9305	5.82895e-19	up	GO:0005634,nucleus; GO:0003677,DNA binding; GO:0003700,DNA binding transcription factor activity; GO:0045892,negative regulation of transcription, DNA-templated; GO:0006351,transcription, DNA-templated
Capana04g000137	2425.31	7242.21	1.57844	6.21275e-19	up	--
Capana10g000211	569.221	1336.63	1.23042	6.52336e-19	up	GO:0005886,plasma membrane; GO:0005524,ATP binding; GO:0004674,protein serine/threonine kinase activity; GO:0033160,positive regulation of protein import into nucleus, translocation; GO:0046777,protein autophosphorylation; GO:0009409,response to cold; GO:0050826,response to freezing; GO:0009625,response to insect; GO:0002237,response to molecule of bacterial origin
Capana01g002043	526.699	1177.95	1.16176	6.53417e-19	up	GO:0005759,mitochondrial matrix; GO:0003863,3-methyl-2-oxobutanoate dehydrogenase (2-methylpropanoyl-transferring) activity; GO:0043617,cellular response to sucrose starvation; GO:0009646,response to absence of light; GO:0009744,response to sucrose
Capana08g000937	1024.45	3217.37	1.65196	6.68752e-19	up	GO:0009507,chloroplast; GO:0009941,chloroplast envelope; GO:0009706,chloroplast inner membrane; GO:0016021,integral component of membrane; GO:0009536,plastid; GO:0005315,inorganic phosphate transmembrane transporter activity; GO:0015229,L-ascorbic acid transmembrane transporter activity; GO:0098656,anion transmembrane transport; GO:0015882,L-ascorbic acid transmembrane transport; GO:0010028,xanth…
Capana02g002147	6.99803	461.947	6.05463	6.94161e-19	up	GO:0016021,integral component of membrane
Capana03g004041	67.7476	555.746	3.04416	7.38435e-19	up	GO:0005829,cytosol; GO:0005654,nucleoplasm; GO:0005634,nucleus; GO:0032440,2-alkenal reductase [NAD(P)] activity; GO:0046686,response to cadmium ion; GO:0006979,response to oxidative stress
Capana02g002871	235.724	1639.11	2.80205	8.18365e-19	up	GO:0005634,nucleus; GO:0004842,ubiquitin-protein transferase activity
Capana02g001973	2815.52	5749.61	1.0301	8.65462e-19	up	--
Capana01g000225	3193.09	6427.63	1.00976	8.90203e-19	up	GO:0005737,cytoplasm; GO:0004602,glutathione peroxidase activity; GO:0047066,phospholipid-hydroperoxide glutathione peroxidase activity; GO:0006979,response to oxidative stress
Capana00g004781	1997.99	5696.01	1.51188	9.6351e-19	up	--
Capana07g001938	8.34721	171.801	4.41448	9.66371e-19	up	--
Capana11g000743	374.904	1220.54	1.70183	9.66818e-19	up	GO:0005737,cytoplasm; GO:0005634,nucleus; GO:0005524,ATP binding; GO:0004707,MAP kinase activity; GO:0043622,cortical microtubule organization; GO:0010468,regulation of gene expression
Capana01g001347	14.4203	416.531	4.82671	9.95219e-19	up	GO:0016021,integral component of membrane; GO:0055085,transmembrane transport
Capana08g001103	34.5833	694.788	4.30986	1.05941e-18	up	GO:0005737,cytoplasm; GO:0005634,nucleus; GO:0009734,auxin-activated signaling pathway; GO:0007275,multicellular organism development; GO:0040008,regulation of growth; GO:1900140,regulation of seedling development
Capana07g000165	0.727643	381.82	9.30329	1.08197e-18	up	GO:0005737,cytoplasm; GO:0016020,membrane; GO:0043531,ADP binding; GO:0005524,ATP binding; GO:0009626,plant-type hypersensitive response
Capana01g002787	247.096	717.413	1.54079	1.12397e-18	up	--
Capana00g002564	1661.94	4075.76	1.29394	1.23565e-18	up	--
Capana04g001919	104.054	493.949	2.23913	1.24326e-18	up	--
Capana05g000439	288.339	819.35	1.50786	1.25414e-18	up	GO:0043231,intracellular membrane-bounded organelle; GO:0004519,endonuclease activity; GO:0003723,RNA binding; GO:0009451,RNA modification
Capana02g001428	1127.06	2341.16	1.05616	1.27506e-18	up	GO:0005737,cytoplasm; GO:0005847,mRNA cleavage and polyadenylation specificity factor complex; GO:0005634,nucleus; GO:0005516,calmodulin binding; GO:0003677,DNA binding; GO:0004519,endonuclease activity; GO:0004521,endoribonuclease activity; GO:0046872,metal ion binding; GO:0003729,mRNA binding; GO:0003723,RNA binding; GO:0031124,mRNA 3'-end processing; GO:0006378,mRNA polyadenylation; GO:0009626…
Capana00g002843	450.828	939.122	1.05833	1.3189e-18	up	--
Capana12g000508	659.642	1559.96	1.24263	1.33926e-18	up	GO:0005634,nucleus; GO:0003700,DNA binding transcription factor activity; GO:0007623,circadian rhythm; GO:0010031,circumnutation; GO:0048573,photoperiodism, flowering; GO:0009585,red, far-red light phototransduction; GO:0009909,regulation of flower development; GO:0010119,regulation of stomatal movement; GO:0009737,response to abscisic acid; GO:0009733,response to auxin; GO:0009409,response to co…
Capana07g000060	25.8454	216.843	3.08346	1.70393e-18	up	GO:0048046,apoplast; GO:0005618,cell wall; GO:0005794,Golgi apparatus; GO:0004553,hydrolase activity, hydrolyzing O-glycosyl compounds; GO:0016762,xyloglucan:xyloglucosyl transferase activity; GO:0042546,cell wall biogenesis; GO:0009664,plant-type cell wall organization; GO:0009733,response to auxin; GO:0009741,response to brassinosteroid; GO:0009409,response to cold; GO:0009408,response to heat;…
Capana03g001209	59.8514	431.193	2.84576	1.73253e-18	up	GO:0016021,integral component of membrane; GO:0016020,membrane; GO:0046872,metal ion binding; GO:0061630,ubiquitin protein ligase activity; GO:0004842,ubiquitin-protein transferase activity; GO:0043562,cellular response to nitrogen levels; GO:0009816,defense response to bacterium, incompatible interaction; GO:0009814,defense response, incompatible interaction; GO:0043161,proteasome-mediated ubiqu…
Capana08g002142	18.0585	191.358	3.3967	1.87362e-18	up	--
Capana10g002389	0	359.753	11.0646	1.87972e-18	up	--
Capana03g001073	218.307	547.23	1.32753	1.90238e-18	up	--
Capana03g002972	796.175	1671.82	1.0699	2.0181e-18	up	--
Capana02g001274	7821.83	19902	1.34739	2.15271e-18	up	GO:0005615,extracellular space; GO:0005764,lysosome; GO:0005773,vacuole; GO:0004197,cysteine-type endopeptidase activity; GO:0006952,defense response; GO:0051603,proteolysis involved in cellular protein catabolic process; GO:0050790,regulation of catalytic activity
Capana02g002478	252.664	1615.35	2.67467	2.16042e-18	up	GO:0005615,extracellular space; GO:0004568,chitinase activity; GO:0016998,cell wall macromolecule catabolic process; GO:0006032,chitin catabolic process; GO:0006952,defense response; GO:0000272,polysaccharide catabolic process
Capana01g002566	1208.1	2827.06	1.22636	2.20196e-18	up	--
Capana09g000220	256.199	691.084	1.43251	2.21469e-18	up	GO:0005739,mitochondrion; GO:0008780,acyl-[acyl-carrier-protein]-UDP-N-acetylglucosamine O-acyltransferase activity; GO:0009245,lipid A biosynthetic process; GO:2001289,lipid X metabolic process
Capana01g002517	999.487	2370.06	1.246	2.50069e-18	up	--
Capana03g001832	1462.6	3431.27	1.22986	2.60775e-18	up	GO:0005829,cytosol; GO:0016607,nuclear speck; GO:0005730,nucleolus; GO:0005681,spliceosomal complex; GO:0003729,mRNA binding; GO:0006397,mRNA processing; GO:0008380,RNA splicing
Capana01g000786	775.521	1820.15	1.23036	2.73427e-18	up	--
Capana12g002711	2512.49	5435.1	1.11335	2.84534e-18	up	GO:0005829,cytosol; GO:0005871,kinesin complex; GO:0005874,microtubule; GO:0005886,plasma membrane; GO:0005524,ATP binding; GO:0016887,ATPase activity; GO:0008017,microtubule binding; GO:0003777,microtubule motor activity; GO:0009904,chloroplast accumulation movement; GO:0009903,chloroplast avoidance movement; GO:0007018,microtubule-based movement; GO:0031022,nuclear migration along microfilament
Capana12g000894	150.178	538.368	1.83717	3.00669e-18	up	GO:0005634,nucleus; GO:0003677,DNA binding; GO:0003700,DNA binding transcription factor activity; GO:0046983,protein dimerization activity; GO:0009910,negative regulation of flower development; GO:2000028,regulation of photoperiodism, flowering; GO:0006351,transcription, DNA-templated; GO:0010048,vernalization response
Capana08g000307	0.622001	410.367	9.41067	3.04857e-18	up	--
Capana05g000180	2.11535	256.073	6.79412	3.08089e-18	up	GO:0005737,cytoplasm; GO:0005874,microtubule; GO:0008017,microtubule binding; GO:0071555,cell wall organization; GO:0007010,cytoskeleton organization; GO:0009832,plant-type cell wall biogenesis; GO:0010051,xylem and phloem pattern formation
Capana02g000420	284.394	704.104	1.30714	3.13319e-18	up	GO:0009507,chloroplast; GO:0009706,chloroplast inner membrane; GO:0016021,integral component of membrane; GO:0008195,phosphatidate phosphatase activity; GO:0006651,diacylglycerol biosynthetic process
Capana08g000206	23.7955	211.629	3.16763	3.28861e-18	up	GO:0005887,integral component of plasma membrane; GO:0005249,voltage-gated potassium channel activity; GO:0007623,circadian rhythm; GO:0034765,regulation of ion transmembrane transport; GO:0042391,regulation of membrane potential; GO:0009644,response to high light intensity; GO:0010118,stomatal movement
Capana04g001331	39.2755	5462.34	7.11177	3.46687e-18	up	GO:0005737,cytoplasm; GO:0042132,fructose 1,6-bisphosphate 1-phosphatase activity; GO:0046872,metal ion binding; GO:0005975,carbohydrate metabolic process
Capana02g003080	402.644	1096.6	1.44828	3.47084e-18	up	GO:0004516,nicotinate phosphoribosyltransferase activity; GO:0004514,nicotinate-nucleotide diphosphorylase (carboxylating) activity; GO:0009435,NAD biosynthetic process; GO:0019358,nicotinate nucleotide salvage
Capana00g001263	4223.63	11501.3	1.44539	3.7718e-18	up	--
Capana04g000182	767.688	3073.22	2.00186	4.10263e-18	up	GO:0005576,extracellular region; GO:0006952,defense response
Capana12g000438	2230.55	4468.54	1.00246	4.20866e-18	up	GO:0005783,endoplasmic reticulum; GO:0005789,endoplasmic reticulum membrane; GO:0004343,glucosamine 6-phosphate N-acetyltransferase activity; GO:0006044,N-acetylglucosamine metabolic process; GO:0006048,UDP-N-acetylglucosamine biosynthetic process
Capana00g003982	220.513	584.092	1.40282	4.22443e-18	up	--
Capana00g002881	81.4712	1260.36	3.94369	4.28029e-18	up	--
Capana00g001256	362.939	839.102	1.20909	4.33434e-18	up	--
Capana04g000192	2968.97	8863.08	1.57828	4.51791e-18	up	GO:0009535,chloroplast thylakoid membrane; GO:0009538,photosystem I reaction center; GO:0015979,photosynthesis
Capana00g003129	2308.26	6467.55	1.48693	4.75581e-18	up	--
Capana00g000512	0.363821	450.338	10.4273	5.04299e-18	up	--
Capana11g001963	4.88695	276.627	5.75238	5.70186e-18	up	--
Capana05g002428	10.9984	153.814	3.77709	5.70588e-18	up	--
Capana09g001791	671.022	2063.1	1.6201	5.87471e-18	up	GO:0009507,chloroplast; GO:0004089,carbonate dehydratase activity; GO:0008270,zinc ion binding; GO:0015976,carbon utilization
Capana00g001178	824.639	1719.17	1.0603	6.20747e-18	up	--
Capana11g000213	4850.7	11812.8	1.28402	6.34944e-18	up	GO:0005730,nucleolus; GO:0004407,histone deacetylase activity; GO:0046872,metal ion binding; GO:0003676,nucleic acid binding; GO:0009294,DNA mediated transformation; GO:0009944,polarity specification of adaxial/abaxial axis; GO:0006355,regulation of transcription, DNA-templated; GO:0048364,root development; GO:0010162,seed dormancy process; GO:0006351,transcription, DNA-templated
Capana02g002385	539.914	1259.86	1.22254	6.43276e-18	up	--
Capana11g001948	523.361	1487.04	1.5052	6.49803e-18	up	--
Capana05g000394	767.499	2751.03	1.84145	7.14737e-18	up	--
Capana03g002163	454.513	1194.14	1.39251	7.24318e-18	up	GO:0043231,intracellular membrane-bounded organelle; GO:0004519,endonuclease activity; GO:0003723,RNA binding; GO:0009451,RNA modification
Capana00g004435	1410.53	6845.53	2.27894	7.91551e-18	up	--
Capana03g003159	342.581	819.809	1.25895	8.07412e-18	up	GO:0009507,chloroplast; GO:0009706,chloroplast inner membrane; GO:0009535,chloroplast thylakoid membrane; GO:0016021,integral component of membrane; GO:0009579,thylakoid; GO:0015031,protein transport
Capana03g002387	262.849	829.311	1.65419	8.25835e-18	up	--
Capana04g000788	503.935	3601.28	2.83913	8.49449e-18	up	GO:0016021,integral component of membrane; GO:0005524,ATP binding; GO:0004674,protein serine/threonine kinase activity; GO:0009960,endosperm development
Capana00g002008	7.28453	175.251	4.56704	8.62505e-18	up	--
Capana02g002052	147.275	484.872	1.71638	8.88316e-18	up	GO:0005743,mitochondrial inner membrane; GO:0005758,mitochondrial intermembrane space; GO:0005739,mitochondrion; GO:0005777,peroxisome; GO:0005509,calcium ion binding; GO:0016491,oxidoreductase activity; GO:0055114,oxidation-reduction process
Capana11g001580	731.256	1864.1	1.35182	9.5271e-18	up	GO:0005634,nucleus; GO:0003700,DNA binding transcription factor activity; GO:0042803,protein homodimerization activity; GO:0043565,sequence-specific DNA binding; GO:0009965,leaf morphogenesis; GO:0045893,positive regulation of transcription, DNA-templated; GO:0009637,response to blue light; GO:0009651,response to salt stress; GO:0006351,transcription, DNA-templated
Capana06g001336	13.5354	146.409	3.45374	9.97796e-18	up	--
Capana09g001879	47.4818	233.469	2.28994	1.09234e-17	up	--
Capana01g003451	126.032	674.569	2.41325	1.1632e-17	up	GO:0005739,mitochondrion; GO:0003860,3-hydroxyisobutyryl-CoA hydrolase activity
Capana12g001375	0	239.305	10.477	1.2377e-17	up	--
Capana06g000513	251.961	869.065	1.7863	1.52425e-17	up	--
Capana12g002066	729.612	2196.45	1.58903	1.52763e-17	up	GO:0005794,Golgi apparatus; GO:0016021,integral component of membrane; GO:0005886,plasma membrane; GO:0009506,plasmodesma; GO:0005524,ATP binding; GO:0004675,transmembrane receptor protein serine/threonine kinase activity; GO:0007166,cell surface receptor signaling pathway; GO:0006468,protein phosphorylation
Capana02g003430	45.4516	2586.38	5.82257	1.57803e-17	up	GO:0016787,hydrolase activity; GO:0009932,cell tip growth; GO:0046856,phosphatidylinositol dephosphorylation; GO:0010053,root epidermal cell differentiation; GO:0048765,root hair cell differentiation; GO:0048766,root hair initiation
Capana10g000611	0	247.657	10.526	1.58817e-17	up	GO:0005887,integral component of plasma membrane; GO:0016020,membrane; GO:0005516,calmodulin binding; GO:0030552,cAMP binding; GO:0030553,cGMP binding; GO:0005249,voltage-gated potassium channel activity; GO:0042391,regulation of membrane potential
Capana03g003557	410.827	1897.61	2.20556	1.7609e-17	up	GO:0016021,integral component of membrane; GO:0005886,plasma membrane; GO:0051536,iron-sulfur cluster binding
Capana03g000458	812.788	1735.34	1.09393	1.78159e-17	up	--
Capana09g001543	394.043	865.084	1.13442	1.80887e-17	up	--
Capana06g000974	237.254	858.399	1.85517	1.82146e-17	up	GO:0005737,cytoplasm; GO:0005783,endoplasmic reticulum; GO:0005634,nucleus; GO:0016298,lipase activity; GO:0042803,protein homodimerization activity; GO:0010618,aerenchyma formation; GO:0006629,lipid metabolic process; GO:0009626,plant-type hypersensitive response; GO:0010942,positive regulation of cell death; GO:0010310,regulation of hydrogen peroxide metabolic process; GO:0001666,response to hy…
Capana09g001726	738.772	1576.74	1.09275	1.86308e-17	up	GO:0005776,autophagosome; GO:0031410,cytoplasmic vesicle; GO:0005524,ATP binding; GO:0004674,protein serine/threonine kinase activity; GO:0006914,autophagy; GO:0015031,protein transport
Capana00g003922	291.999	849.158	1.5408	2.04982e-17	up	--
Capana09g002414	583.338	1583.91	1.4419	2.08929e-17	up	--
Capana03g000557	493.646	1748.53	1.82489	2.10925e-17	up	--
Capana03g003349	326.783	961.908	1.55376	2.28726e-17	up	GO:0009507,chloroplast; GO:0047714,galactolipase activity; GO:0008970,phosphatidylcholine 1-acylhydrolase activity; GO:0004806,triglyceride lipase activity; GO:0016042,lipid catabolic process
Capana06g002443	65.5685	299.327	2.19944	2.36539e-17	up	GO:0005737,cytoplasm; GO:0046872,metal ion binding; GO:0004842,ubiquitin-protein transferase activity; GO:0009966,regulation of signal transduction
Capana04g002595	95.6976	349.627	1.86542	2.45108e-17	up	GO:0009705,plant-type vacuole membrane; GO:0005524,ATP binding; GO:0017050,D-erythro-sphingosine kinase activity; GO:0003951,NAD+ kinase activity; GO:0070300,phosphatidic acid binding; GO:0008481,sphinganine kinase activity; GO:0071215,cellular response to abscisic acid stimulus; GO:0009737,response to abscisic acid; GO:0006665,sphingolipid metabolic process
Capana02g001710	6.20827	219.298	5.13417	2.51977e-17	up	GO:0016021,integral component of membrane; GO:0005886,plasma membrane; GO:0005524,ATP binding; GO:0004674,protein serine/threonine kinase activity
Capana11g000622	154.192	561.733	1.86853	2.72855e-17	up	GO:0005886,plasma membrane; GO:0005524,ATP binding; GO:0004675,transmembrane receptor protein serine/threonine kinase activity; GO:0009742,brassinosteroid mediated signaling pathway; GO:0007166,cell surface receptor signaling pathway; GO:1900459,positive regulation of brassinosteroid mediated signaling pathway; GO:0006468,protein phosphorylation
Capana12g000473	366.829	1122.9	1.6131	2.83589e-17	up	GO:0009507,chloroplast; GO:0009535,chloroplast thylakoid membrane; GO:0016021,integral component of membrane; GO:0009523,photosystem II; GO:0015979,photosynthesis
Capana01g002103	4502.4	12692.6	1.49536	2.84461e-17	up	--
Capana09g000661	667.002	1364.58	1.03117	2.86078e-17	up	--
Capana02g000619	202.393	674.322	1.73995	2.86515e-17	up	GO:0009507,chloroplast; GO:0016209,antioxidant activity; GO:0055114,oxidation-reduction process
Capana11g001378	10.779	259.704	4.63741	2.88321e-17	up	GO:0016021,integral component of membrane; GO:0005886,plasma membrane; GO:0022857,transmembrane transporter activity
Capana02g000489	2982.47	10318.2	1.79109	2.97056e-17	up	GO:0048046,apoplast; GO:0009507,chloroplast; GO:0009941,chloroplast envelope; GO:0009570,chloroplast stroma; GO:0016020,membrane; GO:0010287,plastoglobule; GO:0009579,thylakoid; GO:0004332,fructose-bisphosphate aldolase activity; GO:0006094,gluconeogenesis; GO:0006096,glycolytic process; GO:0009737,response to abscisic acid; GO:0046686,response to cadmium ion
Capana02g003617	1098.82	2987.45	1.44292	3.0347e-17	up	GO:0009507,chloroplast; GO:0005634,nucleus; GO:0006355,regulation of transcription, DNA-templated; GO:0006351,transcription, DNA-templated
Capana10g001216	1358.88	2959.47	1.12387	3.18104e-17	up	GO:0009507,chloroplast; GO:0031969,chloroplast membrane; GO:0016021,integral component of membrane; GO:0007275,multicellular organism development
Capana00g001392	114.043	541.285	2.24238	3.27197e-17	up	--
Capana07g002084	14.6357	279.126	4.27966	3.30586e-17	up	--
Capana01g000353	27.0463	171.861	2.67582	3.3415e-17	up	GO:0005634,nucleus; GO:0003677,DNA binding; GO:0003700,DNA binding transcription factor activity; GO:0031347,regulation of defense response; GO:0006355,regulation of transcription, DNA-templated; GO:0006351,transcription, DNA-templated
Capana06g000707	1168.44	2495.4	1.09511	3.35883e-17	up	GO:0005739,mitochondrion; GO:0051537,2 iron, 2 sulfur cluster binding; GO:0051539,4 iron, 4 sulfur cluster binding; GO:0004076,biotin synthase activity; GO:0008270,zinc ion binding; GO:0009102,biotin biosynthetic process
Capana06g000897	2336.31	7240.84	1.63203	3.51416e-17	up	GO:0009507,chloroplast; GO:0102131,3-oxo-glutaryl-[acp] methyl ester reductase activity; GO:0102132,3-oxo-pimeloyl-[acp] methyl ester reductase activity; GO:0004316,3-oxoacyl-[acyl-carrier-protein] reductase (NADPH) activity; GO:0051287,NAD binding; GO:0006633,fatty acid biosynthetic process
Capana01g003518	686.324	1469.7	1.097	3.68701e-17	up	--
Capana06g001334	3.90614	282.338	6.23886	3.94846e-17	up	--
Capana06g002830	1632.43	3617.49	1.14798	4.18032e-17	up	GO:0005634,nucleus; GO:0032041,NAD-dependent histone deacetylase activity (H3-K14 specific); GO:0006355,regulation of transcription, DNA-templated; GO:0006351,transcription, DNA-templated
Capana09g000221	134.907	744.571	2.4695	4.56443e-17	up	--
Capana07g000243	519.183	1425.33	1.45714	4.57934e-17	up	--
Capana05g001952	888.235	1815.95	1.03265	4.64753e-17	up	--
Capana08g000681	0	216.051	10.33	5.02056e-17	up	GO:0080008,Cul4-RING E3 ubiquitin ligase complex
Capana00g002336	90.0317	433.559	2.26823	5.0413e-17	up	--
Capana08g001512	2296.23	7163.44	1.64157	5.14645e-17	up	GO:0048046,apoplast; GO:0005618,cell wall; GO:0004553,hydrolase activity, hydrolyzing O-glycosyl compounds; GO:0016762,xyloglucan:xyloglucosyl transferase activity; GO:0042546,cell wall biogenesis; GO:0071555,cell wall organization; GO:0010411,xyloglucan metabolic process
Capana04g002566	83.548	428.661	2.36692	5.46441e-17	up	GO:0005779,integral component of peroxisomal membrane
Capana05g002164	165.149	906.439	2.45793	6.05476e-17	up	GO:0016021,integral component of membrane; GO:0005886,plasma membrane; GO:0022857,transmembrane transporter activity
Capana02g003137	0.995567	175.278	7.22347	6.15807e-17	up	GO:0005789,endoplasmic reticulum membrane; GO:0071782,endoplasmic reticulum tubular network; GO:0071458,integral component of cytoplasmic side of endoplasmic reticulum membrane; GO:0071786,endoplasmic reticulum tubular network organization
Capana02g000664	55.3614	975.944	4.14674	6.18056e-17	up	GO:0008080,N-acetyltransferase activity; GO:0016747,transferase activity, transferring acyl groups other than amino-acyl groups; GO:0006473,protein acetylation
Capana02g001679	441.519	1946.95	2.13826	6.35412e-17	up	GO:0016021,integral component of membrane; GO:0005886,plasma membrane; GO:0009506,plasmodesma; GO:0005524,ATP binding; GO:0004674,protein serine/threonine kinase activity; GO:0009861,jasmonic acid and ethylene-dependent systemic resistance; GO:0045088,regulation of innate immune response
Capana01g000364	1356.97	3915.07	1.52939	6.48167e-17	up	GO:0009507,chloroplast; GO:0009534,chloroplast thylakoid; GO:0009535,chloroplast thylakoid membrane; GO:0016021,integral component of membrane; GO:0009579,thylakoid; GO:0042802,identical protein binding; GO:0016730,oxidoreductase activity, acting on iron-sulfur proteins as donors; GO:0019904,protein domain specific binding; GO:0015979,photosynthesis; GO:0009773,photosynthetic electron transport i…
Capana00g002600	736.293	1689.67	1.1992	6.48376e-17	up	--
Capana04g002814	25.3336	476.575	4.25672	6.86486e-17	up	GO:0016021,integral component of membrane; GO:0005215,transporter activity
Capana05g002538	899.469	1869.46	1.0558	6.93822e-17	up	GO:0009507,chloroplast; GO:0009570,chloroplast stroma; GO:0008807,carboxyvinyl-carboxyphosphonate phosphorylmutase activity; GO:0008152,metabolic process
Capana12g000001	160.343	489.637	1.61487	6.96118e-17	up	GO:0005737,cytoplasm; GO:0005789,endoplasmic reticulum membrane; GO:0010008,endosome membrane; GO:0005887,integral component of plasma membrane; GO:0004198,calcium-dependent cysteine-type endopeptidase activity; GO:0008234,cysteine-type peptidase activity; GO:0009793,embryo development ending in seed dormancy; GO:0090628,plant epidermal cell fate specification; GO:0032877,positive regulation of D…
Capana04g002888	0.995567	182.504	7.28292	7.31736e-17	up	GO:0016021,integral component of membrane; GO:0005886,plasma membrane; GO:0015171,amino acid transmembrane transporter activity; GO:0015293,symporter activity; GO:0043090,amino acid import; GO:0080167,response to karrikin
Capana08g001896	4624.1	12353.7	1.41783	7.38564e-17	up	GO:0009507,chloroplast; GO:0051537,2 iron, 2 sulfur cluster binding; GO:0009055,electron transfer activity; GO:0046872,metal ion binding
Capana09g001112	31.005	321.312	3.3566	8.22926e-17	up	GO:0005794,Golgi apparatus; GO:0000139,Golgi membrane; GO:0016021,integral component of membrane; GO:0005886,plasma membrane; GO:1990538,xylan O-acetyltransferase activity; GO:0030244,cellulose biosynthetic process; GO:0045489,pectin biosynthetic process; GO:0009827,plant-type cell wall modification; GO:0045492,xylan biosynthetic process
Capana10g000810	118.492	1017.62	3.10947	8.38021e-17	up	GO:0005829,cytosol; GO:0005524,ATP binding; GO:0061630,ubiquitin protein ligase activity; GO:0031625,ubiquitin protein ligase binding; GO:0004842,ubiquitin-protein transferase activity; GO:0006511,ubiquitin-dependent protein catabolic process
Capana02g001084	267.654	602.788	1.16955	8.49379e-17	up	--
Capana12g000399	81.7729	371.363	2.17873	8.61711e-17	up	GO:0005829,cytosol; GO:0047724,inosine nucleosidase activity; GO:0035251,UDP-glucosyltransferase activity; GO:0045437,uridine nucleosidase activity; GO:0006148,inosine catabolic process; GO:0010150,leaf senescence
Capana02g002151	911.233	1875.31	1.04213	8.82905e-17	up	GO:0005789,endoplasmic reticulum membrane; GO:0016021,integral component of membrane
Capana12g002616	1007.43	2414.99	1.26161	8.99476e-17	up	GO:0005634,nucleus; GO:0003677,DNA binding; GO:0046872,metal ion binding
Capana03g001799	3407.86	8091.02	1.24774	9.6217e-17	up	--
Capana02g003258	203.465	874.582	2.09941	9.93898e-17	up	GO:0031225,anchored component of membrane; GO:0005886,plasma membrane; GO:0005774,vacuolar membrane; GO:0016049,cell growth; GO:0010215,cellulose microfibril organization; GO:0009834,plant-type secondary cell wall biogenesis
Capana00g005036	4125.05	12785.8	1.63229	1.00063e-16	up	--
Capana02g002685	120.639	1540.45	3.67115	1.00122e-16	up	GO:0005783,endoplasmic reticulum; GO:0016021,integral component of membrane; GO:0080132,fatty acid alpha-hydroxylase activity; GO:0020037,heme binding; GO:0005506,iron ion binding; GO:0016705,oxidoreductase activity, acting on paired donors, with incorporation or reduction of molecular oxygen; GO:0010012,steroid 22-alpha hydroxylase activity; GO:0016132,brassinosteroid biosynthetic process; GO:00…
Capana03g002064	699.692	1637.62	1.22684	1.02167e-16	up	GO:0016021,integral component of membrane; GO:0005743,mitochondrial inner membrane; GO:0005739,mitochondrion; GO:0016530,metallochaperone activity; GO:0022857,transmembrane transporter activity; GO:0005215,transporter activity; GO:0006828,manganese ion transport; GO:0006839,mitochondrial transport; GO:1901562,response to paraquat
Capana05g000047	43.1142	233.46	2.43923	1.02488e-16	up	GO:0005730,nucleolus; GO:0003723,RNA binding; GO:0000027,ribosomal large subunit assembly; GO:0006364,rRNA processing
Capana07g002441	58.7082	317.852	2.43923	1.07633e-16	up	GO:0005739,mitochondrion; GO:0004519,endonuclease activity; GO:0003723,RNA binding; GO:0080156,mitochondrial mRNA modification
Capana02g002479	1530.92	9571.06	2.64455	1.09008e-16	up	GO:0005615,extracellular space; GO:0004568,chitinase activity; GO:0016998,cell wall macromolecule catabolic process; GO:0006032,chitin catabolic process; GO:0006952,defense response; GO:0000272,polysaccharide catabolic process; GO:0009607,response to biotic stimulus
Capana06g001396	845.829	1959.44	1.21169	1.11907e-16	up	GO:0005737,cytoplasm; GO:0005634,nucleus; GO:0005886,plasma membrane; GO:0033550,MAP kinase tyrosine phosphatase activity; GO:0004725,protein tyrosine phosphatase activity; GO:0006952,defense response; GO:0035556,intracellular signal transduction; GO:0031348,negative regulation of defense response
Capana02g001634	0.808784	173.812	7.60147	1.13363e-16	up	GO:0046872,metal ion binding; GO:0016682,oxidoreductase activity, acting on diphenols and related substances as donors, oxygen as acceptor; GO:0010150,leaf senescence
Capana00g004214	32.9619	355.413	3.41148	1.14713e-16	up	--
Capana10g000094	704.054	1847.61	1.39202	1.15312e-16	up	--
Capana12g001821	0	205.902	10.2608	1.19454e-16	up	GO:0080008,Cul4-RING E3 ubiquitin ligase complex; GO:0005737,cytoplasm; GO:0005829,cytosol; GO:0005730,nucleolus; GO:0005634,nucleus; GO:0046872,metal ion binding; GO:0030154,cell differentiation; GO:0016569,covalent chromatin modification; GO:0006281,DNA repair; GO:0009908,flower development; GO:0006355,regulation of transcription, DNA-templated; GO:0010224,response to UV-B; GO:0006351,transcrip…
Capana00g002499	346.97	910.27	1.38793	1.21219e-16	up	--
Capana02g003676	149.512	728.091	2.28973	1.25164e-16	up	GO:0005886,plasma membrane; GO:0005524,ATP binding; GO:0004672,protein kinase activity; GO:0004674,protein serine/threonine kinase activity; GO:0004675,transmembrane receptor protein serine/threonine kinase activity; GO:0007166,cell surface receptor signaling pathway; GO:0006952,defense response; GO:0042742,defense response to bacterium; GO:0009816,defense response to bacterium, incompatible inte…
Capana02g001108	1657.23	5115.36	1.62579	1.26493e-16	up	GO:0005783,endoplasmic reticulum; GO:0047652,allantoate deiminase activity; GO:0046872,metal ion binding; GO:0008237,metallopeptidase activity; GO:0006144,purine nucleobase metabolic process
Capana02g003434	1529.36	3064.62	1.0033	1.27097e-16	up	GO:0009507,chloroplast; GO:0009941,chloroplast envelope; GO:0009570,chloroplast stroma; GO:0009535,chloroplast thylakoid membrane; GO:0043234,NA; GO:0080085,signal recognition particle, chloroplast targeting; GO:0005786,signal recognition particle, endoplasmic reticulum targeting; GO:0097718,disordered domain specific binding; GO:0042802,identical protein binding; GO:0046872,metal ion binding; GO…
Capana04g001710	925.472	1964.53	1.08549	1.32995e-16	up	GO:0005634,nucleus; GO:0003677,DNA binding; GO:0003700,DNA binding transcription factor activity; GO:0000981,RNA polymerase II transcription factor activity, sequence-specific DNA binding; GO:0006355,regulation of transcription, DNA-templated; GO:0006351,transcription, DNA-templated
Capana07g000440	475.143	2435.77	2.35846	1.4603e-16	up	GO:0009055,electron transfer activity; GO:0046872,metal ion binding
Capana12g000169	3700.33	10789	1.54388	1.4608e-16	up	--
Capana07g002487	1213.14	2489.61	1.03764	1.49337e-16	up	GO:0009570,chloroplast stroma; GO:0005524,ATP binding; GO:0008094,DNA-dependent ATPase activity; GO:0003690,double-stranded DNA binding; GO:0000400,four-way junction DNA binding; GO:0000150,recombinase activity; GO:0003697,single-stranded DNA binding; GO:0006974,cellular response to DNA damage stimulus; GO:0000730,DNA recombinase assembly; GO:0006312,mitotic recombination; GO:0010212,response to …
Capana12g000098	3.69486	109.061	4.90929	1.51706e-16	up	GO:0016021,integral component of membrane; GO:0016020,membrane; GO:0020037,heme binding; GO:0005506,iron ion binding; GO:0016709,oxidoreductase activity, acting on paired donors, with incorporation or reduction of molecular oxygen, NAD(P)H as one donor, and incorporation of one atom of oxygen; GO:0044550,secondary metabolite biosynthetic process
Capana12g002631	134.296	526.312	1.96341	1.53045e-16	up	GO:0048046,apoplast; GO:0008622,epsilon DNA polymerase complex; GO:0051539,4 iron, 4 sulfur cluster binding; GO:0003677,DNA binding; GO:0003887,DNA-directed DNA polymerase activity; GO:0000166,nucleotide binding; GO:0008310,single-stranded DNA 3'-5' exodeoxyribonuclease activity; GO:0008270,zinc ion binding; GO:0006287,base-excision repair, gap-filling; GO:0045004,DNA replication proofreading; GO…
Capana01g001554	2.23957	161.286	6.09581	1.59228e-16	up	GO:0005576,extracellular region; GO:0020037,heme binding; GO:0046872,metal ion binding; GO:0004601,peroxidase activity; GO:0042744,hydrogen peroxide catabolic process; GO:0006979,response to oxidative stress
Capana03g002641	0	197.603	10.2005	1.66365e-16	up	GO:0005634,nucleus; GO:0000502,proteasome complex; GO:0030234,enzyme regulator activity; GO:0042176,regulation of protein catabolic process
Capana07g001036	0.497784	384.654	9.3431	1.69784e-16	up	GO:0016021,integral component of membrane; GO:0005886,plasma membrane; GO:0009506,plasmodesma; GO:0005524,ATP binding; GO:0016301,kinase activity; GO:0004672,protein kinase activity; GO:0033612,receptor serine/threonine kinase binding; GO:0042742,defense response to bacterium; GO:0060548,negative regulation of cell death; GO:0031348,negative regulation of defense response
Capana01g002193	115.037	479.999	2.06594	1.81386e-16	up	GO:0005886,plasma membrane
Capana04g002056	0	201.13	10.227	1.90514e-16	up	GO:0005829,cytosol; GO:0009506,plasmodesma; GO:0005524,ATP binding; GO:0004674,protein serine/threonine kinase activity; GO:0004712,protein serine/threonine/tyrosine kinase activity; GO:0004713,protein tyrosine kinase activity; GO:0009789,positive regulation of abscisic acid-activated signaling pathway; GO:0046777,protein autophosphorylation; GO:0006468,protein phosphorylation; GO:0009737,respons…
Capana03g001767	1783.71	3906.43	1.13188	1.94871e-16	up	--
Capana04g000188	3.07285	114.565	5.24605	1.97872e-16	up	--
Capana07g002488	9755.27	32308	1.72769	1.98889e-16	up	GO:0009535,chloroplast thylakoid membrane; GO:0009654,photosystem II oxygen evolving complex; GO:0010270,photosystem II oxygen evolving complex assembly; GO:0009735,response to cytokinin
Capana08g001686	459.751	1210.9	1.39781	2.01787e-16	up	--
Capana01g000845	593.49	1404.27	1.24467	2.03184e-16	up	GO:0009507,chloroplast; GO:0010193,response to ozone; GO:0010224,response to UV-B; GO:0009611,response to wounding
Capana08g001578	4582.18	15835.1	1.78913	2.07715e-16	up	GO:0005634,nucleus; GO:0003677,DNA binding; GO:0045893,positive regulation of transcription, DNA-templated; GO:0009737,response to abscisic acid; GO:0009651,response to salt stress; GO:0009414,response to water deprivation
Capana12g002221	188.213	528.816	1.49116	2.08044e-16	up	--
Capana05g001275	304.288	804.967	1.40685	2.10764e-16	up	--
Capana07g000951	2529.72	5516.58	1.12468	2.22801e-16	up	--
Capana06g002539	721.367	1541.8	1.0974	2.38739e-16	up	GO:0009570,chloroplast stroma; GO:0005737,cytoplasm; GO:0005524,ATP binding; GO:0016301,kinase activity; GO:0000287,magnesium ion binding; GO:0030955,potassium ion binding; GO:0004743,pyruvate kinase activity; GO:0006096,glycolytic process
Capana08g000979	691.07	1648.03	1.25195	2.48296e-16	up	--
Capana00g003075	268.415	732.973	1.45254	2.49909e-16	up	--
Capana04g000852	550.69	1288.28	1.22433	2.62065e-16	up	GO:0005634,nucleus; GO:0000160,phosphorelay signal transduction system; GO:0006355,regulation of transcription, DNA-templated; GO:0048511,rhythmic process; GO:0006351,transcription, DNA-templated
Capana01g000073	55.0802	393.927	2.84986	2.63805e-16	up	GO:0005886,plasma membrane; GO:0004555,alpha,alpha-trehalase activity; GO:0005993,trehalose catabolic process
Capana00g004709	766.945	2960.72	1.95007	2.78292e-16	up	--
Capana02g001566	52.9874	257.174	2.27208	2.80208e-16	up	GO:0016021,integral component of membrane; GO:0016020,membrane; GO:0005345,purine nucleobase transmembrane transporter activity; GO:0006863,purine nucleobase transport; GO:0009624,response to nematode
Capana02g002119	71.3457	701.466	3.29669	2.88166e-16	up	GO:0016021,integral component of membrane; GO:0005886,plasma membrane; GO:0005524,ATP binding; GO:0005516,calmodulin binding; GO:0030246,carbohydrate binding; GO:0004674,protein serine/threonine kinase activity; GO:0006468,protein phosphorylation; GO:0048544,recognition of pollen
Capana08g002394	527.875	1343.54	1.34758	2.92559e-16	up	--
Capana11g000131	871.712	1967.76	1.17435	2.9653e-16	up	GO:0004462,lactoylglutathione lyase activity; GO:0046872,metal ion binding; GO:0009651,response to salt stress; GO:0009414,response to water deprivation
Capana00g004890	104.041	367.607	1.82077	3.06414e-16	up	--
Capana03g001556	223.558	617.843	1.46713	3.18344e-16	up	GO:0005829,cytosol; GO:0005634,nucleus; GO:0005886,plasma membrane; GO:0051879,Hsp90 protein binding; GO:0070678,preprotein binding; GO:0051131,chaperone-mediated protein complex assembly; GO:0046686,response to cadmium ion
Capana12g002162	12.5475	2043.06	7.33505	3.65284e-16	up	--
Capana00g002729	685.465	1535.57	1.16536	3.99531e-16	up	--
Capana03g000213	436.047	1141.42	1.38808	4.07793e-16	up	--
Capana06g001179	2306.41	5797.02	1.33012	4.31222e-16	up	GO:0031462,Cul2-RING ubiquitin ligase complex; GO:0080008,Cul4-RING E3 ubiquitin ligase complex; GO:0031467,Cul7-RING ubiquitin ligase complex; GO:0005737,cytoplasm; GO:0043224,nuclear SCF ubiquitin ligase complex; GO:0097602,cullin family protein binding; GO:0019788,NEDD8 transferase activity; GO:0061630,ubiquitin protein ligase activity; GO:0008270,zinc ion binding; GO:0045116,protein neddylati…
Capana10g001809	7.81992	182.214	4.49121	4.36749e-16	up	GO:0009501,amyloplast; GO:0046872,metal ion binding; GO:0061630,ubiquitin protein ligase activity; GO:0004842,ubiquitin-protein transferase activity; GO:0009630,gravitropism; GO:0043161,proteasome-mediated ubiquitin-dependent protein catabolic process; GO:0000209,protein polyubiquitination; GO:0042787,NA
Capana04g002850	1441.45	3109.08	1.10902	4.65007e-16	up	GO:0016021,integral component of membrane; GO:0004605,phosphatidate cytidylyltransferase activity; GO:0016024,CDP-diacylglycerol biosynthetic process
Capana05g002461	87.078	355.745	2.03943	4.66644e-16	up	GO:0016758,transferase activity, transferring hexosyl groups; GO:0008152,metabolic process
Capana00g003380	411.197	1011.28	1.29693	5.00185e-16	up	--
Capana02g003100	399.673	2628.29	2.71814	5.1486e-16	up	GO:0005634,nucleus; GO:0003700,DNA binding transcription factor activity; GO:0043565,sequence-specific DNA binding; GO:0006351,transcription, DNA-templated
Capana05g002277	214.534	538.274	1.32936	5.49733e-16	up	--
Capana12g002837	1247.65	4107.96	1.71955	5.63856e-16	up	--
Capana04g000387	879.241	1866.43	1.08645	6.40653e-16	up	--
Capana08g000250	8858.26	23699.3	1.41988	6.43223e-16	up	GO:0009941,chloroplast envelope; GO:0009535,chloroplast thylakoid membrane; GO:0016021,integral component of membrane; GO:0009522,photosystem I; GO:0009523,photosystem II; GO:0010287,plastoglobule; GO:0016168,chlorophyll binding; GO:0046872,metal ion binding; GO:0031409,pigment binding; GO:0009768,photosynthesis, light harvesting in photosystem I; GO:0018298,protein-chromophore linkage; GO:000941…
Capana08g001281	190.14	871.015	2.19345	6.5661e-16	up	--
Capana07g000523	0	173.949	10.017	7.05184e-16	up	GO:0016021,integral component of membrane; GO:0005886,plasma membrane; GO:0005524,ATP binding; GO:0004674,protein serine/threonine kinase activity
Capana09g002216	265.622	763.138	1.52424	7.31493e-16	up	--
Capana10g001975	39.3885	199.487	2.33512	8.37518e-16	up	GO:0003677,DNA binding; GO:0008270,zinc ion binding
Capana09g000599	425.713	1132.74	1.41452	8.52469e-16	up	GO:0016021,integral component of membrane; GO:0005747,mitochondrial respiratory chain complex I; GO:0005739,mitochondrion; GO:0005774,vacuolar membrane
Capana00g004438	963.382	2871.31	1.57611	8.5906e-16	up	--
Capana06g002873	9810.45	21907.2	1.15912	8.91614e-16	up	GO:0005524,ATP binding; GO:0016740,transferase activity; GO:0016567,protein ubiquitination
Capana03g001178	290.023	638.031	1.13613	9.25419e-16	up	--
Capana11g000652	38.5459	327.032	3.07856	9.28216e-16	up	GO:0080008,Cul4-RING E3 ubiquitin ligase complex; GO:0005737,cytoplasm; GO:0031931,TORC1 complex; GO:0030674,protein binding, bridging; GO:0071230,cellular response to amino acid stimulus; GO:0009267,cellular response to starvation; GO:0009793,embryo development ending in seed dormancy; GO:0010492,maintenance of shoot apical meristem identity; GO:0030307,positive regulation of cell growth; GO:007…
Capana11g002032	2221.26	5725.12	1.3658	9.32738e-16	up	GO:0005737,cytoplasm; GO:1990135,flavonoid sulfotransferase activity; GO:0008146,sulfotransferase activity; GO:0009812,flavonoid metabolic process
Capana00g002335	125.301	541.589	2.10475	9.86235e-16	up	--
Capana07g000027	397.058	1127.3	1.5081	1.00065e-15	up	GO:0005789,endoplasmic reticulum membrane; GO:0016021,integral component of membrane; GO:0020037,heme binding; GO:0005506,iron ion binding; GO:0004497,monooxygenase activity; GO:0016705,oxidoreductase activity, acting on paired donors, with incorporation or reduction of molecular oxygen
Capana07g002004	350.787	1291.04	1.87683	1.03432e-15	up	GO:0004364,glutathione transferase activity; GO:0009734,auxin-activated signaling pathway
Capana02g001186	172.219	566.173	1.72281	1.05773e-15	up	GO:0030246,carbohydrate binding; GO:0043394,proteoglycan binding; GO:0009625,response to insect
Capana02g003316	500.362	1102.75	1.14175	1.05852e-15	up	GO:0009507,chloroplast; GO:0004519,endonuclease activity; GO:0003723,RNA binding; GO:0009451,RNA modification
Capana07g000285	1756.9	4288.69	1.2874	1.06315e-15	up	GO:0005634,nucleus; GO:0003677,DNA binding; GO:0006355,regulation of transcription, DNA-templated
Capana03g000098	1948.59	4112.8	1.07774	1.0682e-15	up	GO:0009507,chloroplast; GO:0005524,ATP binding; GO:0005525,GTP binding; GO:0008728,GTP diphosphokinase activity; GO:0016301,kinase activity; GO:0015970,guanosine tetraphosphate biosynthetic process; GO:0010150,leaf senescence; GO:0015979,photosynthesis
Capana04g000400	61.91	299.455	2.27019	1.14416e-15	up	GO:0005737,cytoplasm; GO:0031982,vesicle; GO:0007015,actin filament organization; GO:0071483,cellular response to blue light; GO:0009904,chloroplast accumulation movement; GO:0009903,chloroplast avoidance movement; GO:0006898,receptor-mediated endocytosis
Capana10g000718	97.5318	376.87	1.94636	1.22777e-15	up	--
Capana01g000725	475.044	1321.93	1.474	1.25046e-15	up	GO:0005783,endoplasmic reticulum; GO:0003700,DNA binding transcription factor activity; GO:0046872,metal ion binding; GO:0071522,ureidoglycine aminohydrolase activity; GO:0000256,allantoin catabolic process; GO:0006145,purine nucleobase catabolic process; GO:0006355,regulation of transcription, DNA-templated; GO:0010136,ureide catabolic process
Capana05g002208	241.915	752.769	1.63957	1.31845e-15	up	GO:0005829,cytosol; GO:0005634,nucleus; GO:0003700,DNA binding transcription factor activity; GO:0043565,sequence-specific DNA binding; GO:0045893,positive regulation of transcription, DNA-templated; GO:0006355,regulation of transcription, DNA-templated; GO:0009410,response to xenobiotic stimulus; GO:0006351,transcription, DNA-templated
Capana08g002705	260.472	666.448	1.3519	1.36158e-15	up	GO:0009682,induced systemic resistance; GO:0009617,response to bacterium; GO:0009723,response to ethylene
Capana03g003836	326.367	932.035	1.51073	1.38826e-15	up	--
Capana09g000656	247.841	800.939	1.69342	1.44003e-15	up	--
Capana03g002401	26.9407	181.499	2.75465	1.47922e-15	up	--
Capana02g001585	1402.96	3039.17	1.11468	1.50565e-15	up	GO:0003729,mRNA binding; GO:0051321,meiotic cell cycle; GO:0045927,positive regulation of growth; GO:0045836,positive regulation of meiotic nuclear division
Capana06g001421	100.179	433.108	2.11656	1.64336e-15	up	GO:0016491,oxidoreductase activity
Capana01g003639	655.624	1614.32	1.29897	1.6996e-15	up	--
Capana12g001744	139.952	396.706	1.5026	1.76676e-15	up	GO:0043231,intracellular membrane-bounded organelle; GO:0016020,membrane; GO:0005886,plasma membrane; GO:0051507,beta-sitosterol UDP-glucosyltransferase activity; GO:0102203,brassicasterol glucosyltransferase activity; GO:0102205,cholesterol allpha-glucosyltransferase activity; GO:0080043,quercetin 3-O-glucosyltransferase activity; GO:0080044,quercetin 7-O-glucosyltransferase activity; GO:0102202…
Capana03g004602	147.493	470.592	1.67037	1.76838e-15	up	GO:0042644,chloroplast nucleoid; GO:0005634,nucleus; GO:0051539,4 iron, 4 sulfur cluster binding; GO:0140078,class I DNA-(apurinic or apyrimidinic site) endonuclease activity; GO:0140080,class III/IV DNA-(apurinic or apyrimidinic site) endonuclease activity; GO:0003677,DNA binding; GO:0019104,DNA N-glycosylase activity; GO:0003906,DNA-(apurinic or apyrimidinic site) endonuclease activity; GO:0046…
Capana08g002451	11.663	138.211	3.58074	1.91577e-15	up	GO:0016298,lipase activity; GO:0080031,methyl salicylate esterase activity; GO:0009862,systemic acquired resistance, salicylic acid mediated signaling pathway
Capana03g001067	1163.17	2817.85	1.27708	2.07625e-15	up	GO:0005737,cytoplasm; GO:0005634,nucleus; GO:0005886,plasma membrane; GO:0005524,ATP binding; GO:0005509,calcium ion binding; GO:0009931,calcium-dependent protein serine/threonine kinase activity; GO:0005516,calmodulin binding; GO:0004683,calmodulin-dependent protein kinase activity; GO:0004672,protein kinase activity; GO:0004674,protein serine/threonine kinase activity; GO:0009738,abscisic acid-…
Capana06g000028	803.994	1630.27	1.01834	2.24786e-15	up	--
Capana08g001567	5829.51	13524.5	1.2143	2.30096e-15	up	GO:0006355,regulation of transcription, DNA-templated
Capana01g000411	377.024	916.73	1.27923	2.39372e-15	up	GO:0098687,chromosomal region; GO:0005737,cytoplasm; GO:0005739,mitochondrion; GO:0005730,nucleolus; GO:0005654,nucleoplasm; GO:0005634,nucleus; GO:0003680,AT DNA binding; GO:0003677,DNA binding; GO:0043565,sequence-specific DNA binding; GO:0006355,regulation of transcription, DNA-templated; GO:0006351,transcription, DNA-templated
Capana06g000654	618.193	1253.12	1.02018	2.41273e-15	up	--
Capana08g002398	141.895	478.908	1.76025	2.45192e-15	up	GO:0005829,cytosol; GO:0052689,carboxylic ester hydrolase activity; GO:0009056,catabolic process
Capana03g001614	2.17746	119.022	5.66407	2.57979e-15	up	GO:0005618,cell wall; GO:0009507,chloroplast; GO:0016021,integral component of membrane; GO:0016020,membrane; GO:0005743,mitochondrial inner membrane; GO:0005739,mitochondrion; GO:0005774,vacuolar membrane; GO:0015114,phosphate ion transmembrane transporter activity; GO:0006839,mitochondrial transport; GO:0009651,response to salt stress
Capana11g000539	372.183	1019.31	1.45112	2.81119e-15	up	GO:0005634,nucleus; GO:0003677,DNA binding; GO:0003700,DNA binding transcription factor activity; GO:0046982,protein heterodimerization activity; GO:0003712,transcription cofactor activity; GO:0009738,abscisic acid-activated signaling pathway; GO:0009740,gibberellic acid mediated signaling pathway; GO:0048574,long-day photoperiodism, flowering; GO:2000306,positive regulation of photomorphogenesis…
Capana08g002213	228.717	546.889	1.25828	3.00332e-15	up	GO:0009507,chloroplast; GO:0016020,membrane; GO:0005739,mitochondrion; GO:0004815,aspartate-tRNA ligase activity; GO:0005524,ATP binding; GO:0003677,DNA binding; GO:0046872,metal ion binding; GO:0006418,tRNA aminoacylation for protein translation
Capana03g002870	0	156.949	9.86897	3.06985e-15	up	GO:0005737,cytoplasm; GO:0000151,ubiquitin ligase complex; GO:0061630,ubiquitin protein ligase activity; GO:0004842,ubiquitin-protein transferase activity; GO:0008270,zinc ion binding; GO:0050994,regulation of lipid catabolic process; GO:0010029,regulation of seed germination; GO:0009737,response to abscisic acid; GO:0006511,ubiquitin-dependent protein catabolic process; GO:0071596,ubiquitin-depe…
Capana00g003453	3395.54	7394.79	1.12264	3.14015e-15	up	--
Capana08g002774	259.007	593.475	1.19712	3.17895e-15	up	--
Capana01g003910	3227.66	10277.4	1.6712	3.2194e-15	up	GO:0009507,chloroplast; GO:0009534,chloroplast thylakoid; GO:0009535,chloroplast thylakoid membrane; GO:0016021,integral component of membrane; GO:0009522,photosystem I; GO:0009579,thylakoid; GO:0016168,chlorophyll binding; GO:0015979,photosynthesis
Capana00g000424	5.43664	107.067	4.30178	3.31528e-15	up	--
Capana03g003619	0	180.961	10.0749	3.91555e-15	up	--
Capana01g004380	112.86	404.74	1.84739	4.5044e-15	up	GO:0005576,extracellular region; GO:0020037,heme binding; GO:0046872,metal ion binding; GO:0004601,peroxidase activity; GO:0042744,hydrogen peroxide catabolic process; GO:0006979,response to oxidative stress
Capana09g000427	299.851	2581.5	3.10363	4.56232e-15	up	GO:0009507,chloroplast; GO:0034387,4-aminobutyrate:pyruvate transaminase activity; GO:0102351,gamma-aminobutyrate transaminase (glyoxylate dependent) activity; GO:0030170,pyridoxal phosphate binding
Capana11g002108	357.537	747.483	1.06559	4.70762e-15	up	GO:0016592,mediator complex; GO:0001104,RNA polymerase II transcription cofactor activity; GO:0035196,production of miRNAs involved in gene silencing by miRNA; GO:0006351,transcription, DNA-templated
Capana06g000410	515.59	1183.81	1.19833	4.77095e-15	up	GO:0005829,cytosol; GO:0005634,nucleus; GO:0003700,DNA binding transcription factor activity; GO:0043565,sequence-specific DNA binding; GO:0045893,positive regulation of transcription, DNA-templated; GO:0006355,regulation of transcription, DNA-templated; GO:0009410,response to xenobiotic stimulus; GO:0006351,transcription, DNA-templated
Capana08g001792	778.858	1937.57	1.31351	4.86088e-15	up	--
Capana01g000815	211.187	1214.43	2.52773	4.9905e-15	up	GO:0052659,inositol-1,3,4,5-tetrakisphosphate 5-phosphatase activity; GO:0052658,inositol-1,4,5-trisphosphate 5-phosphatase activity; GO:0004445,inositol-polyphosphate 5-phosphatase activity; GO:0034485,phosphatidylinositol-3,4,5-trisphosphate 5-phosphatase activity; GO:0004439,phosphatidylinositol-4,5-bisphosphate 5-phosphatase activity; GO:0009738,abscisic acid-activated signaling pathway; GO:0…
Capana04g002643	13.4239	152.655	3.50103	5.06672e-15	up	--
Capana04g000991	39.4316	250.467	2.66888	5.24198e-15	up	--
Capana02g002881	1075.69	3208.59	1.57659	5.75393e-15	up	GO:0009507,chloroplast; GO:0009569,chloroplast starch grain; GO:0009570,chloroplast stroma; GO:0030247,polysaccharide binding; GO:2001070,starch binding; GO:0010581,regulation of starch biosynthetic process; GO:0019252,starch biosynthetic process
Capana01g003563	404.653	846.755	1.06633	5.80962e-15	up	--
Capana08g002446	0.870893	139.83	7.27987	5.90659e-15	up	GO:0050529,polyneuridine-aldehyde esterase activity; GO:0009820,alkaloid metabolic process
Capana06g001969	697.068	2523.48	1.85639	6.01533e-15	up	GO:0009507,chloroplast; GO:0009941,chloroplast envelope; GO:0009534,chloroplast thylakoid; GO:0009535,chloroplast thylakoid membrane
Capana01g003985	173.991	646.524	1.89415	6.81771e-15	up	GO:0009941,chloroplast envelope; GO:0005634,nucleus; GO:0003677,DNA binding; GO:0006355,regulation of transcription, DNA-templated; GO:0009409,response to cold; GO:0006351,transcription, DNA-templated
Capana02g002108	9.48558	186.738	4.32853	7.22057e-15	up	GO:0016021,integral component of membrane; GO:0005886,plasma membrane; GO:0005524,ATP binding; GO:0005516,calmodulin binding; GO:0030246,carbohydrate binding; GO:0004674,protein serine/threonine kinase activity; GO:0006468,protein phosphorylation; GO:0048544,recognition of pollen
Capana02g000650	467.313	1057.79	1.17765	7.81977e-15	up	GO:0005789,endoplasmic reticulum membrane; GO:0005794,Golgi apparatus; GO:0016021,integral component of membrane; GO:0005506,iron ion binding; GO:0031418,L-ascorbic acid binding; GO:0004656,procollagen-proline 4-dioxygenase activity
Capana01g004439	1211	3814.33	1.656	8.11555e-15	up	GO:0009507,chloroplast; GO:0009534,chloroplast thylakoid; GO:0009535,chloroplast thylakoid membrane; GO:0016021,integral component of membrane; GO:0009579,thylakoid; GO:0042802,identical protein binding; GO:0016730,oxidoreductase activity, acting on iron-sulfur proteins as donors; GO:0019904,protein domain specific binding; GO:0015979,photosynthesis; GO:0009773,photosynthetic electron transport i…
Capana12g002622	2.69929	146.664	5.87166	8.35478e-15	up	GO:0016021,integral component of membrane; GO:0015297,antiporter activity; GO:0015238,drug transmembrane transporter activity; GO:0006855,drug transmembrane transport
Capana05g002536	1400.02	3093.82	1.14422	8.65182e-15	up	GO:0009317,acetyl-CoA carboxylase complex; GO:0009507,chloroplast; GO:0003989,acetyl-CoA carboxylase activity; GO:0006633,fatty acid biosynthetic process
Capana11g002347	4676.19	11389.3	1.28461	1.02528e-14	up	GO:0009507,chloroplast; GO:0009570,chloroplast stroma; GO:0009534,chloroplast thylakoid; GO:0005739,mitochondrion; GO:0009536,plastid; GO:0010287,plastoglobule; GO:0004332,fructose-bisphosphate aldolase activity; GO:0006094,gluconeogenesis; GO:0006096,glycolytic process; GO:0046686,response to cadmium ion; GO:0006979,response to oxidative stress
Capana04g000149	3567.62	8386.02	1.23333	1.02979e-14	up	GO:0005737,cytoplasm; GO:0047134,protein-disulfide reductase activity; GO:0004791,thioredoxin-disulfide reductase activity; GO:0045454,cell redox homeostasis
Capana01g004456	99.2246	775.125	2.95774	1.25239e-14	up	GO:0005887,integral component of plasma membrane; GO:0015250,water channel activity; GO:0034220,ion transmembrane transport
Capana11g001268	9.43321	119.328	3.67161	1.29883e-14	up	--
Capana04g002757	4.21122	146.041	5.11466	1.41368e-14	up	GO:0016021,integral component of membrane; GO:0005886,plasma membrane; GO:0005524,ATP binding; GO:0004674,protein serine/threonine kinase activity
Capana10g001502	716.578	3338.79	2.22078	1.44015e-14	up	GO:0005887,integral component of plasma membrane; GO:0005886,plasma membrane; GO:0012506,vesicle membrane; GO:0015075,ion transmembrane transporter activity; GO:0005460,UDP-glucose transmembrane transporter activity; GO:0010044,response to aluminum ion
Capana09g000120	337.725	3213.33	3.24764	1.46283e-14	up	GO:0047172,shikimate O-hydroxycinnamoyltransferase activity
Capana12g002131	19.0496	469.476	4.59944	1.5644e-14	up	GO:0005737,cytoplasm; GO:0016021,integral component of membrane; GO:0003865,3-oxo-5-alpha-steroid 4-dehydrogenase activity; GO:0047751,cholestenone 5-alpha-reductase activity; GO:0050213,progesterone 5-alpha-reductase activity; GO:0016132,brassinosteroid biosynthetic process; GO:0055114,oxidation-reduction process; GO:0090378,seed trichome elongation; GO:0090377,seed trichome initiation
Capana02g001637	997.806	4482.55	2.16638	1.61274e-14	up	GO:0046872,metal ion binding; GO:0016682,oxidoreductase activity, acting on diphenols and related substances as donors, oxygen as acceptor; GO:0010150,leaf senescence
Capana05g002481	474.866	964.387	1.02444	1.69065e-14	up	GO:0005634,nucleus; GO:0003746,translation elongation factor activity; GO:0008270,zinc ion binding; GO:0009910,negative regulation of flower development; GO:0034243,regulation of transcription elongation from RNA polymerase II promoter; GO:0009739,response to gibberellin; GO:0010162,seed dormancy process; GO:0009845,seed germination; GO:0006351,transcription, DNA-templated
Capana01g000498	1280.95	2696.92	1.07531	1.72344e-14	up	--
Capana01g004401	873.982	2082.55	1.25409	2.08697e-14	up	GO:0000421,autophagosome membrane; GO:0031410,cytoplasmic vesicle; GO:0005874,microtubule; GO:0006914,autophagy; GO:0006995,cellular response to nitrogen starvation; GO:0015031,protein transport
Capana10g002082	14.3206	263.345	4.1805	2.1066e-14	up	GO:0046658,anchored component of plasma membrane; GO:0009507,chloroplast; GO:0016021,integral component of membrane; GO:0009506,plasmodesma; GO:0004871,signal transducer activity; GO:0051607,defense response to virus; GO:0010150,leaf senescence; GO:0051707,response to other organism
Capana02g001321	4017.36	11664.1	1.53793	2.16635e-14	up	GO:0009507,chloroplast; GO:0009941,chloroplast envelope; GO:0009534,chloroplast thylakoid; GO:0009535,chloroplast thylakoid membrane; GO:0016021,integral component of membrane; GO:0016020,membrane; GO:0009538,photosystem I reaction center; GO:0010287,plastoglobule; GO:0009579,thylakoid; GO:0019904,protein domain specific binding; GO:0015979,photosynthesis
Capana06g002188	27.3388	189.235	2.79859	2.20789e-14	up	GO:0005737,cytoplasm; GO:0005634,nucleus; GO:0046872,metal ion binding; GO:0061630,ubiquitin protein ligase activity; GO:0004842,ubiquitin-protein transferase activity; GO:0009738,abscisic acid-activated signaling pathway; GO:0009789,positive regulation of abscisic acid-activated signaling pathway; GO:0043161,proteasome-mediated ubiquitin-dependent protein catabolic process; GO:0016567,protein ub…
Capana12g000685	249.256	589.486	1.24145	2.23577e-14	up	GO:0005737,cytoplasm; GO:0000151,ubiquitin ligase complex; GO:0046872,metal ion binding; GO:0031624,ubiquitin conjugating enzyme binding; GO:0061630,ubiquitin protein ligase activity; GO:0032436,positive regulation of proteasomal ubiquitin-dependent protein catabolic process; GO:0000209,protein polyubiquitination; GO:0042787,NA
Capana00g003200	336.07	703.847	1.06846	2.36753e-14	up	--
Capana11g001070	266.464	693.581	1.37902	2.45808e-14	up	GO:0005777,peroxisome; GO:0051750,delta3,5-delta2,4-dienoyl-CoA isomerase activity; GO:0006635,fatty acid beta-oxidation; GO:0009062,fatty acid catabolic process
Capana06g001381	551.654	1420.82	1.36632	2.4622e-14	up	--
Capana08g002697	521.512	2122.21	2.02249	2.49338e-14	up	--
Capana03g003703	0.311001	232.753	9.47451	2.53968e-14	up	GO:0048046,apoplast; GO:0009505,plant-type cell wall; GO:0005774,vacuolar membrane; GO:0005773,vacuole; GO:0004565,beta-galactosidase activity; GO:0030246,carbohydrate binding; GO:0005975,carbohydrate metabolic process
Capana00g000396	292.841	919.22	1.64862	2.55579e-14	up	--
Capana04g001609	2806.5	8131.94	1.53516	2.57126e-14	up	GO:0009507,chloroplast; GO:0009941,chloroplast envelope; GO:0009570,chloroplast stroma; GO:0022626,cytosolic ribosome; GO:0005886,plasma membrane; GO:0004742,dihydrolipoyllysine-residue acetyltransferase activity; GO:0019904,protein domain specific binding; GO:0006096,glycolytic process
Capana09g000028	1646.52	5287.62	1.68274	2.60322e-14	up	GO:0005634,nucleus; GO:0009873,ethylene-activated signaling pathway; GO:0010105,negative regulation of ethylene-activated signaling pathway; GO:0016567,protein ubiquitination; GO:0009723,response to ethylene; GO:0006511,ubiquitin-dependent protein catabolic process
Capana12g001649	110.511	316.395	1.51654	2.83199e-14	up	--
Capana02g000725	387.654	1083.15	1.4794	2.89656e-14	up	GO:0005524,ATP binding; GO:0004674,protein serine/threonine kinase activity
Capana09g001687	0	130.287	9.60039	3.2478e-14	up	--
Capana10g001918	18.1016	139.498	2.94949	3.34364e-14	up	GO:0030246,carbohydrate binding
Capana11g000144	1010.25	2211.13	1.12949	3.45828e-14	up	--
Capana02g001117	89.804	376.186	2.07025	3.49161e-14	up	GO:0009507,chloroplast; GO:0043231,intracellular membrane-bounded organelle; GO:0004519,endonuclease activity; GO:0003723,RNA binding; GO:0008380,RNA splicing
Capana00g004646	117.877	352.141	1.57505	3.98895e-14	up	--
Capana00g003079	7390.79	15370.1	1.05652	4.03713e-14	up	--
Capana00g003923	933.66	1906.57	1.03033	4.10951e-14	up	--
Capana08g001086	8.11781	129.545	3.99932	4.23066e-14	up	GO:0016021,integral component of membrane; GO:0046872,metal ion binding; GO:0061630,ubiquitin protein ligase activity; GO:0043161,proteasome-mediated ubiquitin-dependent protein catabolic process
Capana00g000984	617.819	1295.02	1.06569	4.56773e-14	up	--
Capana10g001509	0	131.957	9.61911	4.78073e-14	up	GO:0005737,cytoplasm; GO:0005622,intracellular; GO:0005525,GTP binding; GO:0003924,GTPase activity; GO:0003746,translation elongation factor activity
Capana10g000837	27.3816	255.555	3.20254	4.81038e-14	up	GO:0016021,integral component of membrane; GO:0046872,metal ion binding; GO:0055114,oxidation-reduction process
Capana07g000786	0	123.709	9.52548	5.54031e-14	up	GO:0016021,integral component of membrane; GO:0005886,plasma membrane; GO:0009506,plasmodesma; GO:0005524,ATP binding; GO:0004383,guanylate cyclase activity; GO:0001653,peptide receptor activity; GO:0004674,protein serine/threonine kinase activity; GO:0006955,immune response; GO:0045087,innate immune response; GO:0009753,response to jasmonic acid; GO:0009611,response to wounding
Capana05g001477	384.385	874.619	1.18695	5.92171e-14	up	GO:0016021,integral component of membrane; GO:0031966,mitochondrial membrane; GO:0005886,plasma membrane; GO:0046872,metal ion binding; GO:0004252,serine-type endopeptidase activity
Capana08g002507	7351.31	16261.3	1.14543	6.0472e-14	up	GO:0009507,chloroplast; GO:0009570,chloroplast stroma; GO:0051538,3 iron, 4 sulfur cluster binding; GO:0051745,4-hydroxy-3-methylbut-2-en-1-yl diphosphate reductase activity; GO:0046429,4-hydroxy-3-methylbut-2-en-1-yl diphosphate synthase activity; GO:0046872,metal ion binding; GO:0050992,dimethylallyl diphosphate biosynthetic process; GO:0019288,isopentenyl diphosphate biosynthetic process, meth…
Capana01g000882	15.7079	171.179	3.41905	6.10685e-14	up	GO:0005886,plasma membrane; GO:0005524,ATP binding; GO:0005516,calmodulin binding; GO:0030246,carbohydrate binding; GO:0004674,protein serine/threonine kinase activity; GO:0006468,protein phosphorylation; GO:0048544,recognition of pollen
Capana10g002404	440.036	1122.79	1.35415	6.31454e-14	up	--
Capana00g003729	192.178	552.224	1.5223	6.9153e-14	up	--
Capana00g004188	0	121.502	9.49897	7.04686e-14	up	--
Capana03g003633	217.32	596.876	1.45591	7.12876e-14	up	GO:0005783,endoplasmic reticulum; GO:0005794,Golgi apparatus; GO:0005886,plasma membrane; GO:0009506,plasmodesma; GO:0003846,2-acylglycerol O-acyltransferase activity; GO:0090430,caffeoyl-CoA: alcohol caffeoyl transferase activity; GO:0016787,hydrolase activity; GO:0004622,lysophospholipase activity; GO:0009809,lignin biosynthetic process; GO:0006629,lipid metabolic process; GO:0046686,response t…
Capana03g000978	5.09231	199.104	5.21357	7.14966e-14	up	GO:0043231,intracellular membrane-bounded organelle; GO:0080043,quercetin 3-O-glucosyltransferase activity; GO:0080044,quercetin 7-O-glucosyltransferase activity; GO:0008152,metabolic process
Capana08g001921	11.2283	1274.41	6.82327	7.29113e-14	up	GO:0005783,endoplasmic reticulum; GO:0102965,alcohol-forming fatty acyl-CoA reductase activity; GO:0080019,fatty-acyl-CoA reductase (alcohol-forming) activity; GO:0006629,lipid metabolic process; GO:0035336,long-chain fatty-acyl-CoA metabolic process; GO:0010345,suberin biosynthetic process; GO:0010025,wax biosynthetic process
Capana07g000132	402.812	879.107	1.12528	7.5365e-14	up	--
Capana01g003453	302.155	750.407	1.3128	7.58494e-14	up	--
Capana06g000586	808.089	1712.51	1.08466	8.5001e-14	up	GO:0009507,chloroplast; GO:0009570,chloroplast stroma; GO:0047538,2-carboxy-D-arabinitol-1-phosphatase activity
Capana12g002100	545.985	1171.93	1.10186	8.93842e-14	up	--
Capana11g001661	544.689	1210.29	1.15263	9.25165e-14	up	--
Capana11g001308	523.332	1201.99	1.2015	9.31072e-14	up	--
Capana11g001453	440.799	979.752	1.15411	9.68125e-14	up	--
Capana00g002318	813.139	1694.43	1.05902	9.80239e-14	up	--
Capana02g002778	465.982	1076.76	1.20876	9.86495e-14	up	--
Capana08g002625	39.7815	224.095	2.48325	9.88965e-14	up	GO:0005634,nucleus; GO:0000989,transcription factor activity, transcription factor binding; GO:0008270,zinc ion binding; GO:0010100,negative regulation of photomorphogenesis; GO:0006355,regulation of transcription, DNA-templated; GO:0006351,transcription, DNA-templated
Capana07g001011	159.02	413.144	1.37712	9.96197e-14	up	GO:0007142,male meiosis II; GO:0009556,microsporogenesis; GO:0006355,regulation of transcription, DNA-templated
Capana00g004874	181.621	524.81	1.53077	1e-13	up	--
Capana08g002490	27.932	172.202	2.64149	1.03881e-13	up	GO:0005737,cytoplasm; GO:0005634,nucleus; GO:0009846,pollen germination
Capana11g000347	150.506	503.194	1.73797	1.09777e-13	up	GO:0030015,CCR4-NOT core complex; GO:0005634,nucleus; GO:0000932,P-body; GO:0008408,3'-5' exonuclease activity; GO:0046872,metal ion binding; GO:0004535,poly(A)-specific ribonuclease activity; GO:0003723,RNA binding; GO:0042742,defense response to bacterium; GO:0002213,defense response to insect; GO:0043928,exonucleolytic nuclear-transcribed mRNA catabolic process involved in deadenylation-depend…
Capana00g002802	4607.11	16943.3	1.87894	1.16837e-13	up	--
Capana03g000385	2768.81	6362.21	1.20012	1.31782e-13	up	GO:0071013,catalytic step 2 spliceosome; GO:0005730,nucleolus; GO:0005634,nucleus; GO:0071011,precatalytic spliceosome; GO:0000974,Prp19 complex; GO:0009870,defense response signaling pathway, resistance gene-dependent; GO:0010204,defense response signaling pathway, resistance gene-independent; GO:0042742,defense response to bacterium; GO:0050832,defense response to fungus; GO:0045087,innate immu…
Capana02g002906	191.631	1539.65	3.00791	1.34339e-13	up	GO:0009501,amyloplast; GO:0009507,chloroplast; GO:0033201,alpha-1,4-glucan synthase activity; GO:0004373,glycogen (starch) synthase activity; GO:0009011,starch synthase activity; GO:0019252,starch biosynthetic process; GO:0005982,starch metabolic process
Capana00g005037	152.754	397.933	1.38056	1.35589e-13	up	--
Capana12g002912	17.0199	176.736	3.36404	1.36213e-13	up	GO:0005576,extracellular region; GO:0004190,aspartic-type endopeptidase activity
Capana11g001603	123.132	480.7	1.96333	1.37048e-13	up	GO:0005737,cytoplasm; GO:0005634,nucleus; GO:0005886,plasma membrane; GO:0005524,ATP binding; GO:0004675,transmembrane receptor protein serine/threonine kinase activity; GO:0007166,cell surface receptor signaling pathway; GO:0006952,defense response; GO:0006468,protein phosphorylation
Capana07g000049	11.2663	153.865	3.73309	1.42712e-13	up	GO:0032541,cortical endoplasmic reticulum; GO:0005789,endoplasmic reticulum membrane; GO:0016021,integral component of membrane; GO:0005634,nucleus; GO:1990578,perinuclear endoplasmic reticulum membrane; GO:0005886,plasma membrane; GO:0005524,ATP binding; GO:0004674,protein serine/threonine kinase activity; GO:0006952,defense response
Capana00g003405	1601.42	7834.25	2.29114	1.44505e-13	up	--
Capana08g001935	219.104	740.732	1.75816	1.45723e-13	up	GO:0009507,chloroplast; GO:0009534,chloroplast thylakoid; GO:0009535,chloroplast thylakoid membrane; GO:0010287,plastoglobule
Capana03g001463	2.57507	89.7948	5.19735	1.58164e-13	up	GO:0005634,nucleus; GO:0003700,DNA binding transcription factor activity; GO:0046983,protein dimerization activity; GO:0000977,RNA polymerase II regulatory region sequence-specific DNA binding; GO:0048440,carpel development; GO:0048481,plant ovule development; GO:0045944,positive regulation of transcription by RNA polymerase II; GO:0040008,regulation of growth; GO:0006351,transcription, DNA-templ…
Capana06g001585	2524.97	5838.64	1.20923	1.60103e-13	up	GO:0005737,cytoplasm; GO:0005829,cytosol; GO:0005634,nucleus; GO:0005956,protein kinase CK2 complex; GO:0019887,protein kinase regulator activity; GO:0004674,protein serine/threonine kinase activity; GO:0007623,circadian rhythm; GO:0048573,photoperiodism, flowering; GO:0042753,positive regulation of circadian rhythm
Capana04g001109	0	116.875	9.44258	1.68482e-13	up	GO:0016021,integral component of membrane; GO:0005524,ATP binding; GO:0004674,protein serine/threonine kinase activity
Capana03g002564	223.561	510.599	1.19105	1.71466e-13	up	--
Capana02g002104	267.681	561.341	1.06688	1.80312e-13	up	GO:0042644,chloroplast nucleoid; GO:0009658,chloroplast organization; GO:0006355,regulation of transcription, DNA-templated
Capana02g003498	13.7738	2958.27	7.7342	1.85302e-13	up	GO:0009570,chloroplast stroma; GO:0004089,carbonate dehydratase activity; GO:0008270,zinc ion binding; GO:0015976,carbon utilization
Capana01g001400	504.983	1534.4	1.60438	1.85519e-13	up	GO:0016021,integral component of membrane; GO:0016192,vesicle-mediated transport
Capana03g000817	359.894	785.828	1.12469	1.89751e-13	up	--
Capana05g001125	106.742	531.385	2.31246	1.90601e-13	up	GO:0005737,cytoplasm; GO:0005634,nucleus; GO:0046872,metal ion binding; GO:0061630,ubiquitin protein ligase activity; GO:0004842,ubiquitin-protein transferase activity; GO:0009738,abscisic acid-activated signaling pathway; GO:0009789,positive regulation of abscisic acid-activated signaling pathway; GO:0043161,proteasome-mediated ubiquitin-dependent protein catabolic process; GO:0016567,protein ub…
Capana04g000286	1395.6	3262.92	1.22588	2.06361e-13	up	--
Capana02g003627	1.99068	118.435	5.83433	2.30149e-13	up	GO:0016021,integral component of membrane; GO:0005886,plasma membrane; GO:0005524,ATP binding; GO:0004672,protein kinase activity
Capana00g004673	2561.66	8332.31	1.70184	2.43747e-13	up	--
Capana03g000957	345.569	722.092	1.06153	2.45782e-13	up	GO:0005634,nucleus; GO:0003700,DNA binding transcription factor activity; GO:0046982,protein heterodimerization activity; GO:0006355,regulation of transcription, DNA-templated; GO:0006351,transcription, DNA-templated
Capana07g000730	495.237	1900.1	1.93757	2.49767e-13	up	GO:0016157,sucrose synthase activity; GO:0005985,sucrose metabolic process
Capana05g001834	1620.6	3630.71	1.16362	2.50164e-13	up	GO:0009507,chloroplast; GO:0009570,chloroplast stroma; GO:0046872,metal ion binding; GO:0033743,peptide-methionine (R)-S-oxide reductase activity; GO:0030091,protein repair; GO:0006979,response to oxidative stress
Capana03g003165	375.713	785.266	1.0637	2.52826e-13	up	GO:0005783,endoplasmic reticulum; GO:0016021,integral component of membrane; GO:0005886,plasma membrane
Capana09g001054	1301.07	2666.81	1.03508	2.6077e-13	up	GO:1990055,phenylacetaldehyde synthase activity; GO:0030170,pyridoxal phosphate binding; GO:0004837,tyrosine decarboxylase activity; GO:0006559,L-phenylalanine catabolic process; GO:0009611,response to wounding
Capana07g002217	1325.14	2850.26	1.10589	2.67019e-13	up	GO:0008422,beta-glucosidase activity; GO:0102483,scopolin beta-glucosidase activity; GO:0005975,carbohydrate metabolic process; GO:1901657,glycosyl compound metabolic process
Capana02g002364	121.238	455.101	1.9033	2.71338e-13	up	GO:0030665,clathrin-coated vesicle membrane; GO:0000139,Golgi membrane; GO:0016021,integral component of membrane; GO:0031902,late endosome membrane; GO:0005509,calcium ion binding; GO:0015031,protein transport
Capana02g001869	73.7248	233.323	1.6649	2.72542e-13	up	--
Capana06g001896	367.046	774.939	1.07765	3.18791e-13	up	--
Capana10g002038	198.453	437.76	1.141	3.21875e-13	up	GO:0009507,chloroplast; GO:0003723,RNA binding; GO:1901002,positive regulation of response to salt stress
Capana07g002242	406.81	1299.7	1.67286	3.21945e-13	up	--
Capana03g000216	467.139	1017.6	1.12399	3.26812e-13	up	--
Capana12g000218	92.1326	497.917	2.42882	3.34527e-13	up	GO:0071013,catalytic step 2 spliceosome; GO:0005737,cytoplasm; GO:0005730,nucleolus; GO:0005524,ATP binding; GO:0004004,ATP-dependent RNA helicase activity; GO:0003723,RNA binding; GO:0008270,zinc ion binding; GO:0010501,RNA secondary structure unwinding
Capana04g001485	2532.47	5977.31	1.23945	3.47952e-13	up	GO:0016021,integral component of membrane; GO:0046872,metal ion binding; GO:0004722,protein serine/threonine phosphatase activity
Capana01g003080	276.765	603.085	1.12426	3.5365e-13	up	GO:0009507,chloroplast; GO:0022625,cytosolic large ribosomal subunit; GO:0022626,cytosolic ribosome; GO:0016020,membrane; GO:0042788,polysomal ribosome; GO:0003729,mRNA binding; GO:0003723,RNA binding; GO:0003735,structural constituent of ribosome; GO:0002181,cytoplasmic translation; GO:0000463,maturation of LSU-rRNA from tricistronic rRNA transcript (SSU-rRNA, 5.8S rRNA, LSU-rRNA)
Capana03g003241	1164.3	3362.19	1.52898	3.60187e-13	up	GO:0016021,integral component of membrane
Capana10g001881	323.81	948.514	1.55371	3.94297e-13	up	GO:0005737,cytoplasm; GO:0003841,1-acylglycerol-3-phosphate O-acyltransferase activity; GO:0004623,phospholipase A2 activity; GO:0055089,fatty acid homeostasis; GO:0008654,phospholipid biosynthetic process; GO:0055091,phospholipid homeostasis; GO:0070328,triglyceride homeostasis
Capana02g002474	120.31	369.797	1.6133	4.12674e-13	up	GO:0005783,endoplasmic reticulum; GO:0016020,membrane; GO:0005773,vacuole; GO:0016788,hydrolase activity, acting on ester bonds; GO:0009058,biosynthetic process; GO:0009723,response to ethylene; GO:0009620,response to fungus; GO:0009753,response to jasmonic acid; GO:0009751,response to salicylic acid; GO:0009615,response to virus; GO:0009611,response to wounding
Capana02g003499	72.0296	322.284	2.15249	4.29421e-13	up	--
Capana02g000207	297.91	616.327	1.04797	4.54418e-13	up	GO:0009507,chloroplast; GO:0009570,chloroplast stroma; GO:0005777,peroxisome; GO:0008453,alanine-glyoxylate transaminase activity; GO:0047958,glycine:2-oxoglutarate aminotransferase activity; GO:0004021,L-alanine:2-oxoglutarate aminotransferase activity; GO:0030170,pyridoxal phosphate binding; GO:0009058,biosynthetic process; GO:0042853,L-alanine catabolic process
Capana05g001382	96.6199	271.199	1.48817	4.66923e-13	up	--
Capana00g003260	107.441	646.121	2.58488	5.54646e-13	up	--
Capana07g000091	3.465	98.6392	4.79571	5.97415e-13	up	GO:0016021,integral component of membrane; GO:0005886,plasma membrane; GO:0009506,plasmodesma; GO:0005524,ATP binding; GO:0016301,kinase activity; GO:0004672,protein kinase activity; GO:0033612,receptor serine/threonine kinase binding; GO:0042742,defense response to bacterium; GO:0060548,negative regulation of cell death; GO:0031348,negative regulation of defense response
Capana02g002706	4788.7	10388.2	1.11727	6.02579e-13	up	GO:0005634,nucleus; GO:0003677,DNA binding; GO:0003700,DNA binding transcription factor activity; GO:0006952,defense response; GO:0006351,transcription, DNA-templated
Capana12g001820	0	102.023	9.24697	6.05992e-13	up	GO:0005887,integral component of plasma membrane; GO:0005516,calmodulin binding; GO:0030552,cAMP binding; GO:0030553,cGMP binding; GO:0005249,voltage-gated potassium channel activity; GO:0006952,defense response; GO:0042391,regulation of membrane potential; GO:0009617,response to bacterium; GO:0009620,response to fungus
Capana04g001038	40.3258	240.064	2.5615	6.26371e-13	up	GO:0035251,UDP-glucosyltransferase activity; GO:0008152,metabolic process
Capana00g002626	27.1432	182.538	2.7529	6.2946e-13	up	--
Capana00g002363	0.995567	2819.06	11.3475	6.52475e-13	up	--
Capana05g001340	6656.11	13361	1.00506	6.87959e-13	up	GO:0009507,chloroplast; GO:0005730,nucleolus; GO:0005524,ATP binding; GO:0004004,ATP-dependent RNA helicase activity; GO:0003723,RNA binding; GO:0010501,RNA secondary structure unwinding
Capana00g004021	884.274	2528.02	1.51577	6.98923e-13	up	--
Capana12g002686	48.0501	223.566	2.21768	6.99342e-13	up	GO:0005634,nucleus; GO:0003677,DNA binding; GO:0003700,DNA binding transcription factor activity; GO:0046983,protein dimerization activity; GO:0006351,transcription, DNA-templated
Capana06g001760	2.36424	116.789	5.49932	7.31724e-13	up	--
Capana00g003265	420.473	922.939	1.13461	7.34055e-13	up	--
Capana00g002558	25.1077	252.614	3.31292	7.62244e-13	up	--
Capana07g001828	77.9153	251.26	1.68537	7.73762e-13	up	--
Capana09g001737	84.812	352.253	2.04799	8.297e-13	up	--
Capana02g002659	357.973	869.78	1.28163	8.41777e-13	up	GO:0005737,cytoplasm; GO:0005634,nucleus; GO:0003700,DNA binding transcription factor activity; GO:0043565,sequence-specific DNA binding; GO:0044212,transcription regulatory region DNA binding; GO:0006351,transcription, DNA-templated
Capana06g000621	3998.97	9679.3	1.27545	8.72607e-13	up	GO:0009507,chloroplast; GO:0009535,chloroplast thylakoid membrane; GO:0016021,integral component of membrane; GO:0009522,photosystem I; GO:0009579,thylakoid; GO:0009768,photosynthesis, light harvesting in photosystem I; GO:0009767,photosynthetic electron transport chain
Capana02g003144	2659.69	6400.18	1.26721	9.24059e-13	up	GO:0005789,endoplasmic reticulum membrane; GO:0016021,integral component of membrane; GO:0102811,geraniol 10-hydroxylase activity; GO:0020037,heme binding; GO:0005506,iron ion binding; GO:0016709,oxidoreductase activity, acting on paired donors, with incorporation or reduction of molecular oxygen, NAD(P)H as one donor, and incorporation of one atom of oxygen; GO:0016099,monoterpenoid biosynthetic…
Capana10g002414	207.967	800.059	1.94857	9.32055e-13	up	--
Capana01g000132	1004.85	2356.51	1.22899	9.32226e-13	up	GO:0009941,chloroplast envelope; GO:0005874,microtubule; GO:0005654,nucleoplasm; GO:0005634,nucleus; GO:0009524,phragmoplast; GO:0005819,spindle; GO:0008017,microtubule binding; GO:0032147,activation of protein kinase activity; GO:0051301,cell division; GO:0000278,mitotic cell cycle; GO:0090307,mitotic spindle assembly; GO:0060236,regulation of mitotic spindle organization; GO:0051225,spindle ass…
Capana02g002921	607.125	4149.01	2.77145	1.0366e-12	up	GO:0048046,apoplast; GO:0005618,cell wall; GO:0004553,hydrolase activity, hydrolyzing O-glycosyl compounds; GO:0016762,xyloglucan:xyloglucosyl transferase activity; GO:0042546,cell wall biogenesis; GO:0071555,cell wall organization; GO:0010411,xyloglucan metabolic process
Capana02g000695	539.127	1140.35	1.0795	1.06682e-12	up	GO:0009507,chloroplast; GO:0045454,cell redox homeostasis
Capana10g000772	864.467	1766.03	1.02911	1.07844e-12	up	GO:0031969,chloroplast membrane; GO:0009570,chloroplast stroma; GO:0005829,cytosol; GO:0005783,endoplasmic reticulum; GO:0005789,endoplasmic reticulum membrane; GO:0016021,integral component of membrane; GO:0043231,intracellular membrane-bounded organelle; GO:1904962,plastid to vacuole vesicle-mediated transport; GO:0071211,protein targeting to vacuole involved in autophagy
Capana07g002447	282.849	624.848	1.14131	1.10955e-12	up	GO:0009504,cell plate; GO:0016021,integral component of membrane; GO:0005635,nuclear envelope; GO:0031965,nuclear membrane; GO:0046982,protein heterodimerization activity; GO:0042803,protein homodimerization activity; GO:0006997,nucleus organization
Capana00g001044	3.30271	106.641	5.09882	1.21004e-12	up	--
Capana00g002539	0.497784	169.357	8.16072	1.34017e-12	up	--
Capana07g002485	1.11979	106.496	6.48715	1.3532e-12	up	GO:0005634,nucleus; GO:0003677,DNA binding; GO:0003700,DNA binding transcription factor activity; GO:0009734,auxin-activated signaling pathway; GO:0048527,lateral root development; GO:0010072,primary shoot apical meristem specification; GO:0006351,transcription, DNA-templated
Capana04g001898	258.949	799.615	1.62502	1.36363e-12	up	GO:0005789,endoplasmic reticulum membrane; GO:0005524,ATP binding; GO:0004674,protein serine/threonine kinase activity; GO:0004712,protein serine/threonine/tyrosine kinase activity; GO:0004871,signal transducer activity; GO:0071281,cellular response to iron ion; GO:0009873,ethylene-activated signaling pathway; GO:0009686,gibberellin biosynthetic process; GO:0010105,negative regulation of ethylene…
Capana06g000298	285.518	646.457	1.18183	1.40689e-12	up	GO:0005730,nucleolus; GO:0003677,DNA binding; GO:0003700,DNA binding transcription factor activity; GO:0046872,metal ion binding; GO:0006355,regulation of transcription, DNA-templated; GO:0006351,transcription, DNA-templated
Capana10g001550	624.662	1267.89	1.02175	1.41979e-12	up	--
Capana02g002526	16.6531	3032.37	7.50219	1.46422e-12	up	GO:0009507,chloroplast; GO:0009579,thylakoid; GO:0007568,aging; GO:0009753,response to jasmonic acid; GO:0006979,response to oxidative stress; GO:0009611,response to wounding
Capana12g002831	42.2444	306.374	2.86726	1.46678e-12	up	GO:0005829,cytosol; GO:0016491,oxidoreductase activity
Capana02g002751	564.611	1218.5	1.10969	1.48042e-12	up	GO:0005789,endoplasmic reticulum membrane; GO:0016021,integral component of membrane; GO:0102097,(22S)-22-hydroxy-5alpha-campestan-3-one C-23 hydroxylase activity; GO:0020037,heme binding; GO:0005506,iron ion binding; GO:0016709,oxidoreductase activity, acting on paired donors, with incorporation or reduction of molecular oxygen, NAD(P)H as one donor, and incorporation of one atom of oxygen; GO:0…
Capana11g000146	1405.66	3706.55	1.39859	1.49673e-12	up	GO:0009570,chloroplast stroma; GO:0030529,NA; GO:0003723,RNA binding; GO:0000373,Group II intron splicing; GO:0006397,mRNA processing
Capana04g002426	20.5225	281.84	3.76758	1.55816e-12	up	GO:0016021,integral component of membrane; GO:0005886,plasma membrane; GO:0005524,ATP binding; GO:0004674,protein serine/threonine kinase activity
Capana08g002776	542.385	1698.06	1.64824	1.60606e-12	up	GO:0005829,cytosol; GO:0005524,ATP binding; GO:0004674,protein serine/threonine kinase activity; GO:0004712,protein serine/threonine/tyrosine kinase activity; GO:0004871,signal transducer activity; GO:0009658,chloroplast organization; GO:0035556,intracellular signal transduction
Capana01g003448	912.102	4023.54	2.14122	1.69722e-12	up	GO:0005739,mitochondrion; GO:0003860,3-hydroxyisobutyryl-CoA hydrolase activity
Capana07g001737	269.421	635.254	1.23511	1.72579e-12	up	--
Capana00g004529	0.622001	137.215	7.82907	1.75757e-12	up	--
Capana00g003284	6814.21	15501.6	1.18593	1.78567e-12	up	--
Capana03g003006	71.2455	476.617	2.73151	1.97907e-12	up	GO:0005905,clathrin-coated pit; GO:0030136,clathrin-coated vesicle; GO:0005794,Golgi apparatus; GO:0005545,1-phosphatidylinositol binding; GO:0030276,clathrin binding; GO:0048268,clathrin coat assembly; GO:0006897,endocytosis
Capana01g000491	131.494	443.436	1.75957	1.98159e-12	up	GO:0005789,endoplasmic reticulum membrane; GO:0016021,integral component of membrane; GO:0016711,flavonoid 3'-monooxygenase activity; GO:0020037,heme binding; GO:0005506,iron ion binding; GO:0009813,flavonoid biosynthetic process
Capana11g000338	332.336	756.967	1.1907	2.2104e-12	up	--
Capana06g000566	34.791	176.65	2.34737	2.24576e-12	up	--
Capana08g002149	16.5584	172.543	3.38871	2.41512e-12	up	GO:0043531,ADP binding; GO:0005524,ATP binding; GO:0006952,defense response
Capana00g001989	30.4775	139.498	2.1907	2.52935e-12	up	--
Capana04g000513	696.467	1427.34	1.03587	2.66024e-12	up	GO:0009507,chloroplast; GO:0004852,uroporphyrinogen-III synthase activity; GO:0015995,chlorophyll biosynthetic process; GO:0006782,protoporphyrinogen IX biosynthetic process; GO:0006780,uroporphyrinogen III biosynthetic process
Capana03g000005	212.833	558.496	1.39493	2.67632e-12	up	--
Capana07g001321	0	91.4822	9.08933	2.82368e-12	up	--
Capana08g002046	12.3861	152.382	3.58558	2.89287e-12	up	GO:0035251,UDP-glucosyltransferase activity; GO:0008152,metabolic process
Capana04g000836	12302.2	28666.5	1.22053	2.89781e-12	up	GO:0005789,endoplasmic reticulum membrane; GO:0016021,integral component of membrane; GO:0010181,FMN binding; GO:0003958,NADPH-hemoprotein reductase activity
Capana00g004462	0.311001	146.972	8.81119	3.13554e-12	up	--
Capana09g000386	0	445.442	11.3736	3.52863e-12	up	GO:0005737,cytoplasm; GO:0034004,germacradienol synthase activity; GO:0052577,germacrene-D synthase activity; GO:0000287,magnesium ion binding; GO:0016114,terpenoid biosynthetic process
Capana02g003259	452.88	1712.81	1.91688	3.67777e-12	up	GO:0031225,anchored component of membrane; GO:0046658,anchored component of plasma membrane; GO:0009897,external side of plasma membrane; GO:0016328,lateral plasma membrane; GO:0009930,longitudinal side of cell surface; GO:0009505,plant-type cell wall; GO:0005886,plasma membrane; GO:0010215,cellulose microfibril organization; GO:0009825,multidimensional cell growth; GO:0009651,response to salt st…
Capana02g002561	38.5644	391.969	3.35951	3.77538e-12	up	GO:0016021,integral component of membrane; GO:0005622,intracellular; GO:0005886,plasma membrane; GO:0009927,histidine phosphotransfer kinase activity; GO:0005034,osmosensor activity; GO:0000155,phosphorelay sensor kinase activity; GO:0009738,abscisic acid-activated signaling pathway; GO:0006970,response to osmotic stress; GO:0009414,response to water deprivation; GO:0010431,seed maturation; GO:00…
Capana06g000322	0	87.9798	9.03375	3.86952e-12	up	GO:0012505,endomembrane system; GO:0016021,integral component of membrane; GO:0015299,solute:proton antiporter activity; GO:0015672,monovalent inorganic cation transport; GO:0006813,potassium ion transport; GO:0006885,regulation of pH
Capana00g003658	212.767	506.303	1.25348	3.98614e-12	up	--
Capana08g000251	1091.28	2272.11	1.05904	4.42797e-12	up	--
Capana11g000809	578.385	1394.68	1.26793	4.4466e-12	up	GO:0016602,CCAAT-binding factor complex; GO:0003677,DNA binding; GO:0003700,DNA binding transcription factor activity; GO:0009793,embryo development ending in seed dormancy; GO:0055046,microgametogenesis; GO:0048510,regulation of timing of transition from vegetative to reproductive phase; GO:0006355,regulation of transcription, DNA-templated; GO:0048316,seed development; GO:0010262,somatic embryo…
Capana00g001069	641.585	1340.15	1.06465	4.5056e-12	up	--
Capana03g004445	67.7816	1779.1	4.71144	4.50678e-12	up	GO:0006952,defense response; GO:0009607,response to biotic stimulus
Capana12g002167	1773.81	4783.27	1.43116	4.8845e-12	up	GO:0009507,chloroplast; GO:0043231,intracellular membrane-bounded organelle; GO:0004519,endonuclease activity; GO:0003723,RNA binding; GO:0009451,RNA modification
Capana01g001833	3821.6	7988.67	1.06402	5.0174e-12	up	GO:0009507,chloroplast; GO:0005829,cytosol; GO:0005846,nuclear cap binding complex; GO:0010445,nuclear dicing body; GO:0016607,nuclear speck; GO:0005730,nucleolus; GO:0005634,nucleus; GO:0003677,DNA binding; GO:0003700,DNA binding transcription factor activity; GO:0046872,metal ion binding; GO:0006397,mRNA processing; GO:0031053,primary miRNA processing; GO:0010267,production of ta-siRNAs involve…
Capana08g000327	572.572	1208.86	1.07715	5.21805e-12	up	GO:0005634,nucleus; GO:0003677,DNA binding; GO:0003700,DNA binding transcription factor activity; GO:0043565,sequence-specific DNA binding; GO:0010227,floral organ abscission; GO:0008285,negative regulation of cell proliferation; GO:0009640,photomorphogenesis; GO:0010371,regulation of gibberellin biosynthetic process; GO:0090470,shoot organ boundary specification; GO:0006351,transcription, DNA-te…
Capana03g004222	98.6521	313.975	1.66603	5.27134e-12	up	GO:0005634,nucleus; GO:0006974,cellular response to DNA damage stimulus; GO:0006281,DNA repair; GO:0010224,response to UV-B
Capana04g001731	10981.4	25095.2	1.19238	5.61195e-12	up	GO:0009501,amyloplast; GO:0009507,chloroplast; GO:0008184,glycogen phosphorylase activity; GO:0042802,identical protein binding; GO:0102250,linear malto-oligosaccharide phosphorylase activity; GO:0030170,pyridoxal phosphate binding; GO:0102499,SHG alpha-glucan phosphorylase activity; GO:0005975,carbohydrate metabolic process
Capana12g000372	424.707	988.474	1.2177	5.7647e-12	up	--
Capana08g002027	0.497784	141.551	7.90334	5.85151e-12	up	GO:0046872,metal ion binding; GO:0008233,peptidase activity; GO:0043130,ubiquitin binding; GO:0008285,negative regulation of cell proliferation; GO:0046621,negative regulation of organ growth; GO:0048482,plant ovule morphogenesis; GO:1900057,positive regulation of leaf senescence; GO:0048317,seed morphogenesis
Capana07g001122	46.7255	327.098	2.79294	5.88871e-12	up	GO:0005794,Golgi apparatus; GO:0032580,Golgi cisterna membrane; GO:0016021,integral component of membrane; GO:0050373,UDP-arabinose 4-epimerase activity; GO:0003978,UDP-glucose 4-epimerase activity; GO:0019567,arabinose biosynthetic process; GO:0045227,capsule polysaccharide biosynthetic process; GO:0006012,galactose metabolic process; GO:0009832,plant-type cell wall biogenesis; GO:0033358,UDP-L-…
Capana10g002350	28.8923	5063.23	7.44599	6.44057e-12	up	GO:0005737,cytoplasm; GO:0005634,nucleus; GO:0003700,DNA binding transcription factor activity; GO:0043565,sequence-specific DNA binding; GO:0046686,response to cadmium ion; GO:0006351,transcription, DNA-templated
Capana02g002840	74.6333	224.044	1.58723	6.6233e-12	up	GO:0000275,mitochondrial proton-transporting ATP synthase complex, catalytic core F(1); GO:0005524,ATP binding; GO:0046933,proton-transporting ATP synthase activity, rotational mechanism; GO:0015986,ATP synthesis coupled proton transport
Capana00g004859	47.871	206.712	2.10435	7.03461e-12	up	--
Capana07g002108	1016.33	2294.06	1.17609	7.16007e-12	up	GO:0016021,integral component of membrane; GO:0020037,heme binding; GO:0005506,iron ion binding; GO:0004497,monooxygenase activity; GO:0016705,oxidoreductase activity, acting on paired donors, with incorporation or reduction of molecular oxygen
Capana01g001565	433.583	1863	2.10251	7.1648e-12	up	GO:0016021,integral component of membrane; GO:0005886,plasma membrane; GO:0015297,antiporter activity; GO:0015137,citrate transmembrane transporter activity; GO:0015238,drug transmembrane transporter activity; GO:0015746,citrate transport; GO:0010044,response to aluminum ion
Capana02g002620	12.7726	909.47	6.16414	7.24173e-12	up	GO:0005634,nucleus; GO:0000989,transcription factor activity, transcription factor binding; GO:0008270,zinc ion binding; GO:0010100,negative regulation of photomorphogenesis; GO:0006355,regulation of transcription, DNA-templated; GO:0006351,transcription, DNA-templated
Capana04g000499	722.704	1701.79	1.2357	7.60672e-12	up	GO:0005829,cytosol; GO:0005886,plasma membrane; GO:0005524,ATP binding; GO:0004709,MAP kinase kinase kinase activity; GO:0004674,protein serine/threonine kinase activity; GO:0000187,activation of MAPK activity; GO:0032147,activation of protein kinase activity; GO:0071323,cellular response to chitin; GO:0006952,defense response; GO:0046777,protein autophosphorylation; GO:2000071,regulation of defe…
Capana09g001978	7669.54	16800	1.13135	7.71932e-12	up	GO:0005829,cytosol; GO:0005634,nucleus; GO:0005096,GTPase activator activity; GO:0046872,metal ion binding
Capana10g001508	0	82.4753	8.94032	8.29456e-12	up	GO:0022626,cytosolic ribosome; GO:0005759,mitochondrial matrix; GO:0005739,mitochondrion; GO:0005524,ATP binding; GO:0004075,biotin carboxylase activity; GO:0050897,cobalt ion binding; GO:0004485,methylcrotonoyl-CoA carboxylase activity; GO:0006552,leucine catabolic process
Capana01g003327	2274.47	5260.53	1.20999	8.4549e-12	up	GO:0016020,membrane; GO:0005730,nucleolus; GO:0005525,GTP binding; GO:0042254,ribosome biogenesis
Capana00g002532	11.7691	131.54	3.48342	8.62588e-12	up	--
Capana06g000059	11.8591	109.947	3.21848	8.75745e-12	up	GO:0009707,chloroplast outer membrane; GO:0016021,integral component of membrane; GO:0046872,metal ion binding; GO:0004842,ubiquitin-protein transferase activity; GO:0006996,organelle organization; GO:1904215,regulation of protein import into chloroplast stroma
Capana05g000367	1354.8	2727.3	1.01039	9.84754e-12	up	GO:0005777,peroxisome; GO:0050660,flavin adenine dinucleotide binding; GO:0016627,oxidoreductase activity, acting on the CH-CH group of donors; GO:0033539,fatty acid beta-oxidation using acyl-CoA dehydrogenase; GO:0048767,root hair elongation
Capana09g002200	432.491	1231.26	1.50734	1.00898e-11	up	GO:0005737,cytoplasm; GO:0043234,NA; GO:0045548,phenylalanine ammonia-lyase activity; GO:0009800,cinnamic acid biosynthetic process; GO:0006559,L-phenylalanine catabolic process
Capana01g001066	3730.4	8323.18	1.15793	1.03569e-11	up	GO:0016021,integral component of membrane; GO:0016020,membrane; GO:0005524,ATP binding; GO:0042626,ATPase activity, coupled to transmembrane movement of substances
Capana06g002562	135.705	394.532	1.54333	1.08398e-11	up	GO:0005737,cytoplasm; GO:0005634,nucleus; GO:0005524,ATP binding; GO:0004707,MAP kinase activity; GO:0004672,protein kinase activity; GO:0009738,abscisic acid-activated signaling pathway; GO:0010120,camalexin biosynthetic process; GO:0042742,defense response to bacterium; GO:0050832,defense response to fungus; GO:0010229,inflorescence development; GO:0048481,plant ovule development; GO:0009626,pl…
Capana03g000556	644.873	1435.41	1.1537	1.09285e-11	up	GO:0005634,nucleus; GO:0009908,flower development
Capana03g000401	372.386	860.658	1.21055	1.0939e-11	up	--
Capana01g000083	48.5775	219.102	2.16156	1.20141e-11	up	--
Capana02g002032	471.394	1206.26	1.35437	1.20245e-11	up	GO:0005634,nucleus; GO:0003677,DNA binding; GO:0008270,zinc ion binding; GO:0006355,regulation of transcription, DNA-templated; GO:0006351,transcription, DNA-templated
Capana01g001131	208.277	509.603	1.28742	1.22056e-11	up	GO:0005576,extracellular region; GO:0009505,plant-type cell wall; GO:0052793,pectin acetylesterase activity; GO:0071555,cell wall organization
Capana01g002127	0	79.6548	8.89009	1.27614e-11	up	--
Capana05g001103	0.727643	117.94	7.59293	1.39541e-11	up	GO:0005524,ATP binding; GO:0004674,protein serine/threonine kinase activity; GO:0004712,protein serine/threonine/tyrosine kinase activity; GO:0006355,regulation of transcription, DNA-templated
Capana00g001985	384.737	895.752	1.21819	1.43182e-11	up	--
Capana00g000869	98.1062	357.782	1.85969	1.45476e-11	up	--
Capana00g004144	88.3972	281.476	1.67718	1.58763e-11	up	--
Capana09g002217	228.497	487.668	1.09119	1.7512e-11	up	GO:0005634,nucleus; GO:0003677,DNA binding; GO:0003700,DNA binding transcription factor activity; GO:0007623,circadian rhythm; GO:0006355,regulation of transcription, DNA-templated; GO:0006351,transcription, DNA-templated
Capana06g000786	61.599	298.185	2.28592	1.89508e-11	up	GO:0016021,integral component of membrane; GO:0042538,hyperosmotic salinity response; GO:0009737,response to abscisic acid; GO:0009409,response to cold; GO:0009414,response to water deprivation
Capana07g001884	1.34964	86.5827	6.13372	1.99558e-11	up	GO:0016021,integral component of membrane; GO:0020037,heme binding; GO:0005506,iron ion binding; GO:0004497,monooxygenase activity; GO:0016705,oxidoreductase activity, acting on paired donors, with incorporation or reduction of molecular oxygen
Capana03g000593	3162.46	9721.09	1.62017	1.99618e-11	up	GO:0009507,chloroplast; GO:0009941,chloroplast envelope; GO:0009570,chloroplast stroma; GO:0005524,ATP binding; GO:0016887,ATPase activity; GO:0042803,protein homodimerization activity; GO:0034605,cellular response to heat; GO:1901002,positive regulation of response to salt stress; GO:1902584,positive regulation of response to water deprivation; GO:0034214,protein hexamerization; GO:0019538,prote…
Capana07g002484	120.216	308.428	1.36049	1.99786e-11	up	--
Capana01g003450	285.913	626.128	1.12753	2.07796e-11	up	--
Capana10g001125	0	80.5833	8.90769	2.12317e-11	up	--
Capana08g000857	0.995567	165.417	7.18492	2.15557e-11	up	GO:0016021,integral component of membrane; GO:0020037,heme binding; GO:0005506,iron ion binding; GO:0004497,monooxygenase activity; GO:0016705,oxidoreductase activity, acting on paired donors, with incorporation or reduction of molecular oxygen
Capana03g004328	36.1829	193.215	2.43242	2.1955e-11	up	--
Capana06g000279	210.224	760.312	1.8524	2.23022e-11	up	--
Capana02g003338	426.009	892.827	1.07028	2.28924e-11	up	--
Capana02g003480	83.9815	346.364	2.04548	2.4403e-11	up	GO:0016324,apical plasma membrane; GO:0030659,cytoplasmic vesicle membrane; GO:0005887,integral component of plasma membrane; GO:0005262,calcium channel activity; GO:0005516,calmodulin binding; GO:0030552,cAMP binding; GO:0030553,cGMP binding; GO:0005249,voltage-gated potassium channel activity; GO:0006874,cellular calcium ion homeostasis; GO:0009860,pollen tube growth; GO:0042391,regulation of m…
Capana03g002082	63.4203	435.562	2.77276	2.5642e-11	up	GO:0016021,integral component of membrane; GO:0005886,plasma membrane; GO:0005524,ATP binding; GO:0005516,calmodulin binding; GO:0030246,carbohydrate binding; GO:0004674,protein serine/threonine kinase activity; GO:0006468,protein phosphorylation; GO:0048544,recognition of pollen
Capana09g002308	0	76.7067	8.83509	2.6993e-11	up	GO:0000139,Golgi membrane; GO:0016021,integral component of membrane; GO:0016757,transferase activity, transferring glycosyl groups; GO:0071555,cell wall organization; GO:0006486,protein glycosylation
Capana11g000359	472.524	1049.67	1.15141	2.76941e-11	up	GO:0016021,integral component of membrane; GO:0004839,ubiquitin activating enzyme activity; GO:0006914,autophagy; GO:0043482,cellular pigment accumulation; GO:0006995,cellular response to nitrogen starvation; GO:0042742,defense response to bacterium; GO:0050832,defense response to fungus; GO:2000786,positive regulation of autophagosome assembly; GO:0090549,response to carbon starvation
Capana01g003704	78.2588	309.051	1.98273	2.8437e-11	up	GO:0009535,chloroplast thylakoid membrane; GO:0009579,thylakoid; GO:0045549,9-cis-epoxycarotenoid dioxygenase activity; GO:0046872,metal ion binding; GO:0009688,abscisic acid biosynthetic process; GO:0009414,response to water deprivation; GO:0010162,seed dormancy process
Capana08g000398	41.8774	179.24	2.08973	2.87128e-11	up	GO:0005829,cytosol; GO:0005779,integral component of peroxisomal membrane; GO:0005778,peroxisomal membrane; GO:0005777,peroxisome; GO:0004842,ubiquitin-protein transferase activity; GO:0008270,zinc ion binding; GO:0009793,embryo development ending in seed dormancy; GO:0006635,fatty acid beta-oxidation; GO:0007031,peroxisome organization; GO:0010381,peroxisome-chloroplast membrane tethering; GO:00…
Capana00g004560	4556.05	10292.3	1.17598	2.9605e-11	up	--
Capana07g001302	626.004	1252.75	1.00202	2.98755e-11	up	--
Capana02g001615	1.97165	221.842	6.87758	3.21015e-11	up	GO:0005576,extracellular region; GO:0004252,serine-type endopeptidase activity
Capana00g004921	0.497784	148.044	7.97791	3.46548e-11	up	--
Capana01g003121	1394.81	3458.89	1.31049	3.71586e-11	up	GO:0000148,1,3-beta-D-glucan synthase complex; GO:0016021,integral component of membrane; GO:0005886,plasma membrane; GO:0003843,1,3-beta-D-glucan synthase activity; GO:0006075,(1->3)-beta-D-glucan biosynthetic process; GO:0071555,cell wall organization; GO:0008360,regulation of cell shape
Capana11g000941	1241.49	2789.44	1.16898	3.72367e-11	up	GO:0009507,chloroplast; GO:0009534,chloroplast thylakoid; GO:0009535,chloroplast thylakoid membrane; GO:0010287,plastoglobule
Capana11g001442	171.721	754.325	2.13028	3.81255e-11	up	GO:0005737,cytoplasm; GO:0005634,nucleus; GO:0009846,pollen germination
Capana00g003300	289.676	610.508	1.07636	4.03666e-11	up	--
Capana05g002063	132.427	557.134	2.06716	4.14421e-11	up	GO:0005634,nucleus; GO:0003700,DNA binding transcription factor activity; GO:0043565,sequence-specific DNA binding; GO:0044212,transcription regulatory region DNA binding; GO:0010286,heat acclimation; GO:0045893,positive regulation of transcription, DNA-templated; GO:0009408,response to heat; GO:0042542,response to hydrogen peroxide; GO:0010224,response to UV-B; GO:0009414,response to water depri…
Capana07g000830	2466.07	8005.57	1.69858	4.26531e-11	up	GO:0005737,cytoplasm; GO:0047131,saccharopine dehydrogenase (NAD+, L-glutamate-forming) activity; GO:0047130,saccharopine dehydrogenase (NADP+, L-lysine-forming) activity; GO:0004753,saccharopine dehydrogenase activity; GO:0006091,generation of precursor metabolites and energy; GO:0033512,L-lysine catabolic process to acetyl-CoA via saccharopine; GO:0019878,lysine biosynthetic process via aminoad…
Capana12g000159	541.438	1384.09	1.35479	4.38754e-11	up	GO:0005777,peroxisome; GO:0003987,acetate-CoA ligase activity; GO:0047760,butyrate-CoA ligase activity; GO:0006083,acetate metabolic process; GO:0019605,butyrate metabolic process; GO:0006097,glyoxylate cycle
Capana06g000421	393.774	803.988	1.02756	4.47746e-11	up	GO:0005634,nucleus; GO:0005886,plasma membrane; GO:0046872,metal ion binding; GO:0004722,protein serine/threonine phosphatase activity; GO:0048366,leaf development
Capana00g003837	935.515	1921.67	1.03964	4.69053e-11	up	--
Capana12g002037	55.8118	258.206	2.20397	5.39355e-11	up	GO:0005794,Golgi apparatus; GO:0016021,integral component of membrane; GO:0016413,O-acetyltransferase activity; GO:0071554,cell wall organization or biogenesis
Capana07g001593	135.876	413.168	1.60089	5.48381e-11	up	--
Capana02g002947	29.6243	167.584	2.50532	5.50938e-11	up	GO:0016021,integral component of membrane; GO:0030246,carbohydrate binding
Capana01g000039	39.6773	284.664	2.82878	5.58868e-11	up	GO:0009941,chloroplast envelope; GO:0005634,nucleus; GO:0005524,ATP binding; GO:0048366,leaf development; GO:0006355,regulation of transcription, DNA-templated; GO:0006351,transcription, DNA-templated
Capana09g002359	38.6535	302.541	2.96784	6.17984e-11	up	--
Capana01g002608	111.375	446.164	2.00642	6.18608e-11	up	--
Capana06g001660	4.60928	74.2097	4.03044	6.20596e-11	up	GO:0005829,cytosol; GO:0005778,peroxisomal membrane; GO:0033328,peroxisome membrane targeting sequence binding; GO:0007031,peroxisome organization; GO:0006625,protein targeting to peroxisome
Capana11g000244	2.843	557.949	7.59158	6.55499e-11	up	GO:0005783,endoplasmic reticulum; GO:0102965,alcohol-forming fatty acyl-CoA reductase activity; GO:0080019,fatty-acyl-CoA reductase (alcohol-forming) activity; GO:0006629,lipid metabolic process; GO:0035336,long-chain fatty-acyl-CoA metabolic process; GO:0010345,suberin biosynthetic process; GO:0010025,wax biosynthetic process
Capana03g000852	564.867	1430.64	1.33996	6.73364e-11	up	--
Capana00g004456	106.988	355.49	1.72721	7.03226e-11	up	--
Capana04g000833	370.824	759.798	1.0332	7.18742e-11	up	--
Capana03g004317	314.505	1020.58	1.69989	7.40666e-11	up	GO:0048046,apoplast; GO:0009505,plant-type cell wall; GO:0005774,vacuolar membrane; GO:0005773,vacuole; GO:0004565,beta-galactosidase activity; GO:0030246,carbohydrate binding; GO:0005975,carbohydrate metabolic process
Capana03g001087	1126.59	3217.24	1.51385	7.97025e-11	up	--
Capana10g002173	124.947	318.483	1.35115	8.12139e-11	up	--
Capana03g003471	282.396	1570.37	2.47846	8.39599e-11	up	GO:0009507,chloroplast; GO:0016021,integral component of membrane; GO:0009705,plant-type vacuole membrane; GO:0005774,vacuolar membrane; GO:0005773,vacuole; GO:0005355,glucose transmembrane transporter activity; GO:0005351,carbohydrate:proton symporter activity; GO:0046323,glucose import; GO:0035428,NA; GO:0006829,zinc ion transport
Capana08g002688	0	68.373	8.66961	8.50359e-11	up	GO:0048046,apoplast; GO:0016853,isomerase activity
Capana03g002161	0	76.1786	8.82459	8.51962e-11	up	GO:0016021,integral component of membrane
Capana11g001566	236.682	481.422	1.02165	8.69871e-11	up	GO:0009507,chloroplast; GO:2001071,maltoheptaose binding; GO:0030247,polysaccharide binding; GO:0010581,regulation of starch biosynthetic process; GO:0019252,starch biosynthetic process
Capana09g001797	2605.42	8953.86	1.7806	8.78454e-11	up	--
Capana06g000324	17.3135	354.647	4.37457	8.86118e-11	up	--
Capana06g001717	23.4517	145.377	2.62799	9.00879e-11	up	--
Capana03g000968	271.569	577.685	1.09049	9.15416e-11	up	GO:0016021,integral component of membrane; GO:0005743,mitochondrial inner membrane; GO:0002083,4-hydroxybenzoate decaprenyltransferase activity; GO:0047293,4-hydroxybenzoate nonaprenyltransferase activity; GO:0008299,isoprenoid biosynthetic process; GO:0006744,ubiquinone biosynthetic process
Capana10g002256	242.716	672.109	1.47079	9.15859e-11	up	GO:0009507,chloroplast; GO:0009570,chloroplast stroma; GO:0003730,mRNA 3'-UTR binding; GO:0043565,sequence-specific DNA binding; GO:0003747,translation release factor activity; GO:0009658,chloroplast organization; GO:0040008,regulation of growth; GO:0043488,regulation of mRNA stability
Capana11g000241	521.738	1091.42	1.06285	9.25878e-11	up	GO:0005737,cytoplasm; GO:0005634,nucleus; GO:0005886,plasma membrane; GO:0005524,ATP binding; GO:0016301,kinase activity; GO:0019901,protein kinase binding; GO:0004674,protein serine/threonine kinase activity; GO:0035556,intracellular signal transduction
Capana07g001877	10.8171	122.072	3.51483	9.4108e-11	up	GO:0016021,integral component of membrane; GO:0020037,heme binding; GO:0005506,iron ion binding; GO:0004497,monooxygenase activity; GO:0016705,oxidoreductase activity, acting on paired donors, with incorporation or reduction of molecular oxygen
Capana05g001829	86.5421	389.589	2.16718	9.42798e-11	up	GO:0048046,apoplast; GO:0009505,plant-type cell wall; GO:0009506,plasmodesma; GO:0016756,glutathione gamma-glutamylcysteinyltransferase activity; GO:0036374,glutathione hydrolase activity; GO:0102953,hypoglycin A gamma-glutamyl transpeptidase activity; GO:0103068,leukotriene C4 gamma-glutamyl transferase activity; GO:0006751,glutathione catabolic process; GO:0006979,response to oxidative stress
Capana10g002441	391.996	798.926	1.02821	9.88353e-11	up	--
Capana08g000861	1309.38	2816.08	1.10502	1.01197e-10	up	GO:0009707,chloroplast outer membrane; GO:0043661,peribacteroid membrane; GO:0046481,digalactosyldiacylglycerol synthase activity; GO:0009877,nodulation
Capana08g000213	109.885	289.741	1.3967	1.02385e-10	up	GO:0005622,intracellular; GO:0005886,plasma membrane; GO:0005524,ATP binding; GO:0004672,protein kinase activity; GO:0004674,protein serine/threonine kinase activity; GO:0004712,protein serine/threonine/tyrosine kinase activity; GO:0004713,protein tyrosine kinase activity; GO:0004871,signal transducer activity; GO:0035556,intracellular signal transduction; GO:0006468,protein phosphorylation
Capana02g000096	224.76	604.808	1.42855	1.02643e-10	up	GO:0009507,chloroplast; GO:0042254,ribosome biogenesis
Capana05g002309	31.8476	1435.92	5.49153	1.03008e-10	up	GO:0048046,apoplast; GO:0005618,cell wall; GO:0004866,endopeptidase inhibitor activity
Capana12g001905	216.839	612.903	1.49855	1.0569e-10	up	GO:0009507,chloroplast; GO:0005737,cytoplasm; GO:0009536,plastid; GO:0005524,ATP binding; GO:0019150,D-ribulokinase activity; GO:0016773,phosphotransferase activity, alcohol group as acceptor; GO:0016310,phosphorylation
Capana07g001311	0.497784	102.346	7.43557	1.09247e-10	up	GO:0016021,integral component of membrane; GO:0005886,plasma membrane; GO:0005775,vacuolar lumen; GO:0005524,ATP binding; GO:0016301,kinase activity; GO:0004674,protein serine/threonine kinase activity; GO:0009877,nodulation; GO:0046777,protein autophosphorylation; GO:0009609,response to symbiotic bacterium
Capana08g000110	10.1837	175.508	4.07759	1.1922e-10	up	GO:0005634,nucleus; GO:0003700,DNA binding transcription factor activity; GO:0046872,metal ion binding; GO:0043565,sequence-specific DNA binding; GO:0044212,transcription regulatory region DNA binding; GO:0009738,abscisic acid-activated signaling pathway; GO:0019760,glucosinolate metabolic process; GO:0009788,negative regulation of abscisic acid-activated signaling pathway; GO:0006355,regulation …
Capana01g001327	2196.77	4443.5	1.01637	1.19903e-10	up	GO:0000932,P-body; GO:0046872,metal ion binding; GO:0003729,mRNA binding; GO:0050265,RNA uridylyltransferase activity; GO:0006397,mRNA processing; GO:1903705,positive regulation of production of siRNA involved in RNA interference; GO:0060964,regulation of gene silencing by miRNA; GO:0071076,RNA 3' uridylation
Capana08g001106	2.45085	92.1974	5.25529	1.19912e-10	up	GO:0016020,membrane; GO:0020037,heme binding; GO:0005506,iron ion binding; GO:0016709,oxidoreductase activity, acting on paired donors, with incorporation or reduction of molecular oxygen, NAD(P)H as one donor, and incorporation of one atom of oxygen; GO:0044550,secondary metabolite biosynthetic process
Capana03g004055	141.689	535.354	1.91722	1.25558e-10	up	--
Capana05g002058	2.03421	65.6207	4.97744	1.34549e-10	up	GO:0005794,Golgi apparatus; GO:0016021,integral component of membrane; GO:1990538,xylan O-acetyltransferase activity; GO:0009834,plant-type secondary cell wall biogenesis; GO:1990937,xylan acetylation
Capana09g000429	54.0894	286.265	2.39396	1.37293e-10	up	GO:0016021,integral component of membrane; GO:0005886,plasma membrane; GO:0009506,plasmodesma; GO:0005773,vacuole; GO:0005524,ATP binding; GO:0030246,carbohydrate binding; GO:0004674,protein serine/threonine kinase activity; GO:0004675,transmembrane receptor protein serine/threonine kinase activity; GO:0031625,ubiquitin protein ligase binding; GO:0006468,protein phosphorylation; GO:0048544,recogn…
Capana01g000495	30.296	203.517	2.72983	1.45292e-10	up	GO:0005634,nucleus; GO:0003677,DNA binding; GO:0006355,regulation of transcription, DNA-templated; GO:0006351,transcription, DNA-templated
Capana10g000062	1753.3	3957.56	1.17467	1.47772e-10	up	GO:0005777,peroxisome; GO:0008935,1,4-dihydroxy-2-naphthoyl-CoA synthase activity; GO:0016853,isomerase activity; GO:0009234,menaquinone biosynthetic process; GO:0042372,phylloquinone biosynthetic process
Capana06g001083	702.215	1985.6	1.49775	1.53345e-10	up	GO:0016207,4-coumarate-CoA ligase activity; GO:0005524,ATP binding; GO:0009698,phenylpropanoid metabolic process
Capana04g000861	440.553	1041.62	1.24339	1.53808e-10	up	GO:0009507,chloroplast; GO:0031969,chloroplast membrane; GO:0016021,integral component of membrane; GO:0009526,plastid envelope; GO:0010020,chloroplast fission; GO:0006811,ion transport; GO:0055085,transmembrane transport
Capana03g004363	316.149	699.904	1.14472	1.55761e-10	up	GO:0005737,cytoplasm; GO:0005634,nucleus; GO:0000932,P-body; GO:0016779,nucleotidyltransferase activity; GO:0050265,RNA uridylyltransferase activity; GO:0060964,regulation of gene silencing by miRNA; GO:0071076,RNA 3' uridylation
Capana06g001146	94.8663	332.569	1.80612	1.58343e-10	up	--
Capana08g001724	1036.84	2980.28	1.5222	1.59947e-10	up	GO:0016021,integral component of membrane; GO:0005524,ATP binding; GO:0004674,protein serine/threonine kinase activity
Capana04g000139	36.2005	380.71	3.4054	1.70269e-10	up	GO:0005737,cytoplasm; GO:0046914,transition metal ion binding; GO:0046916,cellular transition metal ion homeostasis; GO:0030001,metal ion transport
Capana07g001587	36.0203	169.423	2.23157	1.70448e-10	up	GO:0016021,integral component of membrane; GO:0005886,plasma membrane; GO:0005524,ATP binding; GO:0005516,calmodulin binding; GO:0030246,carbohydrate binding; GO:0004674,protein serine/threonine kinase activity; GO:0006468,protein phosphorylation; GO:0048544,recognition of pollen
Capana02g001709	35.4085	213.477	2.58449	1.70619e-10	up	GO:0016021,integral component of membrane; GO:0016757,transferase activity, transferring glycosyl groups; GO:0006004,fucose metabolic process; GO:0006486,protein glycosylation
Capana12g000117	669.844	1460.52	1.1256	1.726e-10	up	--
Capana05g000514	365.916	745.993	1.02542	1.74064e-10	up	GO:0009507,chloroplast; GO:0043231,intracellular membrane-bounded organelle; GO:0004519,endonuclease activity; GO:0003723,RNA binding; GO:0009451,RNA modification
Capana05g001963	1.72321	170.355	6.59354	1.8357e-10	up	GO:0005783,endoplasmic reticulum; GO:0005811,lipid droplet; GO:0031090,organelle membrane; GO:0046872,metal ion binding; GO:1990137,plant seed peroxidase activity
Capana09g001009	158.777	369.755	1.22072	1.86239e-10	up	GO:0016787,hydrolase activity; GO:0046856,phosphatidylinositol dephosphorylation
Capana08g002007	189.565	459.055	1.28058	1.9274e-10	up	GO:0046872,metal ion binding; GO:0004721,phosphoprotein phosphatase activity
Capana03g003443	402.608	842.102	1.06158	1.96798e-10	up	GO:0005634,nucleus; GO:0071472,cellular response to salt stress; GO:0042631,cellular response to water deprivation; GO:0016567,protein ubiquitination; GO:0006970,response to osmotic stress
Capana03g003936	381.143	904.299	1.24828	1.97622e-10	up	GO:0005829,cytosol; GO:0005634,nucleus; GO:0005681,spliceosomal complex; GO:0003729,mRNA binding; GO:0006397,mRNA processing; GO:0051028,mRNA transport; GO:1901000,regulation of response to salt stress; GO:2000070,regulation of response to water deprivation; GO:0008380,RNA splicing; GO:0010228,vegetative to reproductive phase transition of meristem
Capana03g001161	123.813	357.978	1.53616	2.01304e-10	up	GO:0033597,mitotic checkpoint complex; GO:0005634,nucleus; GO:0010997,anaphase-promoting complex binding; GO:0019900,kinase binding; GO:0097027,ubiquitin-protein transferase activator activity; GO:0007049,cell cycle; GO:0051301,cell division; GO:1904668,positive regulation of ubiquitin protein ligase activity; GO:0016567,protein ubiquitination
Capana01g001808	197.205	484.668	1.29753	2.07469e-10	up	GO:0005634,nucleus; GO:0003677,DNA binding; GO:0003700,DNA binding transcription factor activity; GO:0043565,sequence-specific DNA binding; GO:0009738,abscisic acid-activated signaling pathway; GO:0006351,transcription, DNA-templated
Capana08g002012	4207.41	9336.69	1.15032	2.09005e-10	up	GO:0009941,chloroplast envelope; GO:0009535,chloroplast thylakoid membrane; GO:0016021,integral component of membrane; GO:0009523,photosystem II; GO:0010287,plastoglobule; GO:0016168,chlorophyll binding; GO:0031409,pigment binding; GO:0009768,photosynthesis, light harvesting in photosystem I; GO:0018298,protein-chromophore linkage; GO:0009416,response to light stimulus
Capana12g002278	0.497784	110.321	7.5509	2.16416e-10	up	GO:0016758,transferase activity, transferring hexosyl groups; GO:0008152,metabolic process
Capana04g000253	1494.71	3122.56	1.06313	2.16569e-10	up	--
Capana01g002083	58.2465	215.285	1.88028	2.19697e-10	up	--
Capana06g001723	27.5708	216.878	2.95948	2.2565e-10	up	GO:0009507,chloroplast; GO:0009706,chloroplast inner membrane; GO:0009535,chloroplast thylakoid membrane; GO:0042651,thylakoid membrane; GO:0051537,2 iron, 2 sulfur cluster binding; GO:0010277,chlorophyllide a oxygenase [overall] activity; GO:0005506,iron ion binding; GO:0016705,oxidoreductase activity, acting on paired donors, with incorporation or reduction of molecular oxygen; GO:0015995,chlor…
Capana03g001278	0	67.4864	8.65195	2.2724e-10	up	GO:0016021,integral component of membrane; GO:0020037,heme binding; GO:0005506,iron ion binding; GO:0004497,monooxygenase activity; GO:0016705,oxidoreductase activity, acting on paired donors, with incorporation or reduction of molecular oxygen
Capana07g001909	22.5279	111.83	2.30259	2.6584e-10	up	GO:0048046,apoplast; GO:0005618,cell wall; GO:0005829,cytosol; GO:0005794,Golgi apparatus; GO:0009505,plant-type cell wall; GO:0005774,vacuolar membrane; GO:0030246,carbohydrate binding
Capana02g002284	461.065	1086.41	1.23865	2.70778e-10	up	GO:0009575,chromoplast stroma; GO:0004310,farnesyl-diphosphate farnesyltransferase activity; GO:0016767,geranylgeranyl-diphosphate geranylgeranyltransferase activity; GO:0051996,squalene synthase activity; GO:0016117,carotenoid biosynthetic process; GO:0006696,ergosterol biosynthetic process
Capana04g002312	0	65.5612	8.60823	2.91523e-10	up	--
Capana06g000166	355.615	794.436	1.15682	2.97193e-10	up	GO:0005737,cytoplasm; GO:0005634,nucleus; GO:0005681,spliceosomal complex; GO:0046540,U4/U6 x U5 tri-snRNP complex; GO:0005682,U5 snRNP; GO:0000245,spliceosomal complex assembly
Capana01g004028	603.895	1441.52	1.25654	3.04656e-10	up	GO:0009507,chloroplast; GO:0009543,chloroplast thylakoid lumen; GO:0031977,thylakoid lumen; GO:0005528,FK506 binding; GO:0003755,peptidyl-prolyl cis-trans isomerase activity; GO:0061077,chaperone-mediated protein folding
Capana08g000613	151.773	423.889	1.48543	3.11837e-10	up	GO:0005829,cytosol; GO:0005634,nucleus; GO:0032588,trans-Golgi network membrane; GO:0005086,ARF guanyl-nucleotide exchange factor activity; GO:0009561,megagametogenesis; GO:0015031,protein transport; GO:0032012,regulation of ARF protein signal transduction; GO:0016192,vesicle-mediated transport
Capana07g001239	2435.8	6902.15	1.50283	3.19916e-10	up	GO:0005618,cell wall; GO:0009570,chloroplast stroma; GO:0005739,mitochondrion; GO:0005524,ATP binding; GO:0051082,unfolded protein binding; GO:0006457,protein folding; GO:0006950,response to stress
Capana11g001266	85.8439	331.513	1.94622	3.39145e-10	up	--
Capana02g002039	242.644	990.652	2.02578	3.40288e-10	up	GO:0048046,apoplast; GO:0009507,chloroplast; GO:0005829,cytosol; GO:0005777,peroxisome; GO:0008465,glycerate dehydrogenase activity; GO:0030267,glyoxylate reductase (NADP) activity; GO:0016618,hydroxypyruvate reductase activity; GO:0051287,NAD binding; GO:0008266,poly(U) RNA binding; GO:0071482,cellular response to light stimulus; GO:0042631,cellular response to water deprivation; GO:0009854,oxid…
Capana09g000046	236.072	563.669	1.25596	3.43695e-10	up	--
Capana03g002789	334.087	974.275	1.54559	3.81258e-10	up	GO:0005634,nucleus; GO:0043138,3'-5' DNA helicase activity; GO:0005524,ATP binding; GO:0004003,ATP-dependent DNA helicase activity; GO:0003677,DNA binding; GO:0003678,DNA helicase activity; GO:0006310,DNA recombination; GO:0036292,DNA rewinding
Capana03g001352	5.39949	1545.91	8.16318	4.01091e-10	up	--
Capana00g001879	523.378	1080.5	1.04469	4.2682e-10	up	--
Capana02g000830	323.216	867.469	1.42587	4.32622e-10	up	--
Capana07g002008	0.311001	87.1107	8.05731	4.33812e-10	up	GO:0004364,glutathione transferase activity; GO:0009734,auxin-activated signaling pathway
Capana11g000730	19.1724	117.403	2.59491	4.71085e-10	up	GO:0005737,cytoplasm; GO:0046914,transition metal ion binding; GO:0046916,cellular transition metal ion homeostasis; GO:0030001,metal ion transport
Capana06g002980	0.622001	97.9414	7.33784	4.81305e-10	up	GO:0050660,flavin adenine dinucleotide binding; GO:0103075,indole-3-pyruvate monooxygenase activity; GO:0004499,N,N-dimethylaniline monooxygenase activity; GO:0050661,NADP binding; GO:0009851,auxin biosynthetic process; GO:0009742,brassinosteroid mediated signaling pathway; GO:0010600,regulation of auxin biosynthetic process; GO:0009735,response to cytokinin
Capana07g001987	134.485	403.84	1.58885	4.85048e-10	up	--
Capana04g000742	5.22627	236.765	5.43755	4.93455e-10	up	GO:0005886,plasma membrane; GO:0005524,ATP binding; GO:0005516,calmodulin binding; GO:0030246,carbohydrate binding; GO:0004674,protein serine/threonine kinase activity; GO:0006468,protein phosphorylation; GO:0048544,recognition of pollen
Capana10g002154	0	59.971	8.48115	4.96507e-10	up	GO:0005783,endoplasmic reticulum; GO:0005789,endoplasmic reticulum membrane; GO:0016021,integral component of membrane; GO:0020037,heme binding; GO:0005506,iron ion binding; GO:0080133,midchain alkane hydroxylase activity; GO:0010025,wax biosynthetic process
Capana06g003064	703.805	2013.81	1.51834	5.03923e-10	up	--
Capana10g002239	387.604	840.808	1.11633	5.06832e-10	up	GO:0009507,chloroplast; GO:0009570,chloroplast stroma; GO:0051538,3 iron, 4 sulfur cluster binding; GO:0051745,4-hydroxy-3-methylbut-2-en-1-yl diphosphate reductase activity; GO:0046429,4-hydroxy-3-methylbut-2-en-1-yl diphosphate synthase activity; GO:0046872,metal ion binding; GO:0050992,dimethylallyl diphosphate biosynthetic process; GO:0019288,isopentenyl diphosphate biosynthetic process, meth…
Capana00g000953	265.247	733.391	1.46667	5.09338e-10	up	--
Capana02g000468	667.436	1474.65	1.14221	5.62612e-10	up	GO:0005634,nucleus; GO:0043138,3'-5' DNA helicase activity; GO:0005524,ATP binding; GO:0004003,ATP-dependent DNA helicase activity; GO:0003677,DNA binding; GO:0003678,DNA helicase activity; GO:0006310,DNA recombination; GO:0036292,DNA rewinding
Capana10g001194	380.484	888.66	1.22393	5.87882e-10	up	GO:0009507,chloroplast; GO:0005634,nucleus; GO:0004059,aralkylamine N-acetyltransferase activity; GO:0030187,melatonin biosynthetic process
Capana12g000712	543.078	1588.53	1.55023	6.14243e-10	up	GO:0005829,cytosol; GO:0005886,plasma membrane; GO:0009904,chloroplast accumulation movement; GO:0009903,chloroplast avoidance movement
Capana06g001506	490.66	2460.52	2.32679	6.59181e-10	up	GO:0005634,nucleus; GO:0003700,DNA binding transcription factor activity; GO:0043565,sequence-specific DNA binding; GO:0009738,abscisic acid-activated signaling pathway; GO:0009740,gibberellic acid mediated signaling pathway; GO:0009788,negative regulation of abscisic acid-activated signaling pathway; GO:0009938,negative regulation of gibberellic acid mediated signaling pathway; GO:0045893,positi…
Capana08g001720	137.831	493.077	1.83644	6.77959e-10	up	GO:0016021,integral component of membrane; GO:0005524,ATP binding; GO:0004674,protein serine/threonine kinase activity
Capana00g003596	575.866	7347.9	3.67328	6.82963e-10	up	--
Capana08g002258	971.848	2031.92	1.06492	7.40429e-10	up	GO:0046872,metal ion binding; GO:0061630,ubiquitin protein ligase activity; GO:0043161,proteasome-mediated ubiquitin-dependent protein catabolic process
Capana07g000201	115.508	364.182	1.65015	7.47142e-10	up	GO:0009534,chloroplast thylakoid
Capana00g000298	331.156	836.853	1.34072	7.53921e-10	up	--
Capana03g003648	211.176	1042.16	2.30543	7.59018e-10	up	--
Capana08g001934	716.133	1567.21	1.13004	8.00272e-10	up	--
Capana08g002262	4.61857	61.8543	3.76498	8.29446e-10	up	GO:0005737,cytoplasm
Capana02g002861	169.684	424.936	1.32371	9.16863e-10	up	--
Capana00g004460	650.748	1582.55	1.2837	9.25269e-10	up	--
Capana01g002051	3614.34	7704.1	1.09181	9.61503e-10	up	--
Capana10g001799	844.147	3629.42	2.10499	9.62398e-10	up	--
Capana07g000452	79.2714	227.3	1.51642	9.66989e-10	up	GO:0005737,cytoplasm; GO:0005730,nucleolus; GO:0005524,ATP binding; GO:0004004,ATP-dependent RNA helicase activity; GO:0003723,RNA binding; GO:0010501,RNA secondary structure unwinding
Capana05g001228	248.712	644.661	1.37774	9.78593e-10	up	GO:0031969,chloroplast membrane; GO:0009535,chloroplast thylakoid membrane; GO:0005739,mitochondrion; GO:0055035,plastid thylakoid membrane; GO:0004325,ferrochelatase activity; GO:0006783,heme biosynthetic process; GO:0006779,porphyrin-containing compound biosynthetic process; GO:0033014,tetrapyrrole biosynthetic process
Capana10g001744	463.972	1431.85	1.62529	9.81984e-10	up	--
Capana06g000703	349.164	1387.92	1.98822	9.84785e-10	up	--
Capana08g001891	900.888	1844.7	1.03548	1.01112e-09	up	GO:0016021,integral component of membrane; GO:0005886,plasma membrane; GO:0015095,magnesium ion transmembrane transporter activity
Capana12g000630	0.497784	92.2323	7.29093	1.01842e-09	up	GO:0005737,cytoplasm; GO:0043531,ADP binding; GO:0005524,ATP binding; GO:0009626,plant-type hypersensitive response; GO:0007165,signal transduction
Capana04g000085	851.403	2198.59	1.36887	1.0307e-09	up	GO:0005737,cytoplasm; GO:0019005,SCF ubiquitin ligase complex; GO:0031625,ubiquitin protein ligase binding; GO:0043161,proteasome-mediated ubiquitin-dependent protein catabolic process; GO:0042787,NA; GO:0030162,regulation of proteolysis
Capana06g001650	95.0928	262.296	1.46149	1.04419e-09	up	GO:0005634,nucleus; GO:0003723,RNA binding; GO:0003968,RNA-directed 5'-3' RNA polymerase activity; GO:0048440,carpel development; GO:0048366,leaf development; GO:0010492,maintenance of shoot apical meristem identity; GO:0010267,production of ta-siRNAs involved in RNA interference; GO:0048544,recognition of pollen; GO:0016246,RNA interference; GO:0009616,virus induced gene silencing
Capana07g000005	2.79992	150.985	5.64332	1.09367e-09	up	GO:0005856,cytoskeleton; GO:0005634,nucleus; GO:0009524,phragmoplast; GO:0005524,ATP binding; GO:0007049,cell cycle; GO:0051301,cell division; GO:0015031,protein transport
Capana01g002612	49.1615	179.88	1.86352	1.10343e-09	up	--
Capana10g002001	71.3089	282.789	1.99535	1.10386e-09	up	GO:0009507,chloroplast; GO:0009535,chloroplast thylakoid membrane; GO:0010287,plastoglobule
Capana09g002415	351.644	796.209	1.1761	1.12288e-09	up	GO:0016592,mediator complex; GO:0005730,nucleolus
Capana00g004831	5.08257	325.694	5.97756	1.12734e-09	up	--
Capana05g002490	218.726	508.041	1.21318	1.29007e-09	up	--
Capana01g004101	664.156	1758.71	1.40506	1.31951e-09	up	GO:0005737,cytoplasm; GO:0005634,nucleus; GO:0003677,DNA binding; GO:0003729,mRNA binding; GO:0006355,regulation of transcription, DNA-templated; GO:0046686,response to cadmium ion; GO:0006351,transcription, DNA-templated
Capana07g001521	414.995	838.435	1.01616	1.33544e-09	up	GO:0102229,amylopectin maltohydrolase activity; GO:0016161,beta-amylase activity; GO:0000272,polysaccharide catabolic process
Capana09g002430	1088.93	2196.12	1.01336	1.36293e-09	up	GO:0005096,GTPase activator activity; GO:0007165,signal transduction
Capana06g002928	95.5924	271.719	1.50288	1.42722e-09	up	--
Capana05g001557	181.777	464.458	1.34804	1.4635e-09	up	--
Capana00g003130	8012.8	16233.6	1.01876	1.46371e-09	up	--
Capana06g000114	70.0484	423.205	2.58563	1.50662e-09	up	GO:0005737,cytoplasm; GO:0016021,integral component of membrane; GO:0030797,24-methylenesterol C-methyltransferase activity; GO:0008757,S-adenosylmethionine-dependent methyltransferase activity; GO:0032259,methylation; GO:0016126,sterol biosynthetic process
Capana01g000516	647.872	1305.32	1.01204	1.52362e-09	up	GO:0009507,chloroplast; GO:0009534,chloroplast thylakoid; GO:0009543,chloroplast thylakoid lumen; GO:0009535,chloroplast thylakoid membrane; GO:0009579,thylakoid
Capana03g000475	130.457	362.655	1.48034	1.5297e-09	up	GO:0005829,cytosol; GO:0016621,cinnamoyl-CoA reductase activity; GO:0050662,coenzyme binding; GO:0007623,circadian rhythm; GO:0009809,lignin biosynthetic process; GO:0009409,response to cold
Capana00g000668	8.13684	97.3959	3.56203	1.54755e-09	up	--
Capana08g000144	344.694	1053.96	1.61121	1.56099e-09	up	--
Capana05g000341	476.064	1053.25	1.14806	1.56887e-09	up	--
Capana00g004525	280.978	569.086	1.01826	1.72407e-09	up	--
Capana02g000752	21.3642	109.802	2.36244	1.76119e-09	up	--
Capana02g002376	30.1251	186.542	2.64028	1.78313e-09	up	--
Capana01g003444	51.6556	276.04	2.40493	1.84443e-09	up	--
Capana02g003104	393.008	1197.4	1.60592	1.87987e-09	up	--
Capana05g002550	4681.37	10950.2	1.22614	1.89086e-09	up	GO:0009941,chloroplast envelope; GO:0009535,chloroplast thylakoid membrane; GO:0016021,integral component of membrane; GO:0009522,photosystem I; GO:0009523,photosystem II; GO:0010287,plastoglobule; GO:0016168,chlorophyll binding; GO:0046872,metal ion binding; GO:0031409,pigment binding; GO:0009768,photosynthesis, light harvesting in photosystem I; GO:0018298,protein-chromophore linkage; GO:000941…
Capana09g000318	88.7078	702.553	2.98364	1.95747e-09	up	GO:0005829,cytosol; GO:0004029,aldehyde dehydrogenase (NAD) activity; GO:0050269,coniferyl-aldehyde dehydrogenase activity; GO:0009699,phenylpropanoid biosynthetic process
Capana00g002634	3.11092	146.374	5.4632	1.96281e-09	up	--
Capana03g004417	607.661	1289.41	1.08623	1.96637e-09	up	--
Capana03g000206	76.9304	463.916	2.59075	1.9776e-09	up	GO:0034707,chloride channel complex; GO:0005254,chloride channel activity
Capana08g002357	562.233	1185.03	1.07532	2.04521e-09	up	GO:0004842,ubiquitin-protein transferase activity; GO:0010200,response to chitin
Capana01g002821	85.073	482.989	2.51261	2.05652e-09	up	GO:0005887,integral component of plasma membrane; GO:0005886,plasma membrane; GO:0015301,anion:anion antiporter activity; GO:0005452,inorganic anion exchanger activity; GO:0051453,regulation of intracellular pH; GO:0048364,root development
Capana12g000327	134.314	327.523	1.28459	2.14382e-09	up	GO:0030246,carbohydrate binding; GO:0016567,protein ubiquitination
Capana09g002153	307.682	1056.91	1.7824	2.16496e-09	up	--
Capana09g000448	468.316	1050	1.16722	2.24586e-09	up	GO:0005737,cytoplasm; GO:0009737,response to abscisic acid; GO:0009733,response to auxin; GO:0009723,response to ethylene; GO:0009416,response to light stimulus; GO:0006970,response to osmotic stress
Capana05g001398	1061.11	2270.88	1.09802	2.44976e-09	up	--
Capana08g001607	240.342	525.256	1.12795	2.52212e-09	up	GO:0005739,mitochondrion; GO:0051537,2 iron, 2 sulfur cluster binding; GO:0051539,4 iron, 4 sulfur cluster binding; GO:0005506,iron ion binding; GO:0005198,structural molecule activity; GO:0016226,iron-sulfur cluster assembly; GO:0051604,protein maturation; GO:0097428,protein maturation by iron-sulfur cluster transfer
Capana06g001072	883.839	1927.1	1.12531	2.52519e-09	up	GO:0047501,(+)-neomenthol dehydrogenase activity; GO:0006952,defense response
Capana03g000830	124.344	324.115	1.37685	2.66276e-09	up	GO:0002094,polyprenyltransferase activity; GO:0016094,polyprenol biosynthetic process; GO:0006486,protein glycosylation
Capana07g002303	0	94.7783	9.14207	2.75477e-09	up	--
Capana02g001759	69.7506	203.218	1.54182	2.76464e-09	up	GO:0009507,chloroplast; GO:0004640,phosphoribosylanthranilate isomerase activity; GO:0040007,growth; GO:0007275,multicellular organism development; GO:0009411,response to UV; GO:0000162,tryptophan biosynthetic process
Capana01g002871	252.046	559.5	1.15132	2.77053e-09	up	GO:0005853,eukaryotic translation elongation factor 1 complex; GO:0003746,translation elongation factor activity
Capana11g000090	144.243	324.005	1.16383	2.84531e-09	up	--
Capana02g001733	0.497784	79.1267	7.06934	2.8531e-09	up	--
Capana05g000605	3.34078	80.0378	4.52508	2.8749e-09	up	--
Capana02g000157	107.475	374.5	1.79939	2.90066e-09	up	GO:0005634,nucleus; GO:0042393,histone binding; GO:0046872,metal ion binding; GO:0016569,covalent chromatin modification; GO:0006355,regulation of transcription, DNA-templated; GO:0006351,transcription, DNA-templated
Capana08g002079	72.1094	228.901	1.65934	2.90571e-09	up	GO:0016021,integral component of membrane; GO:0046872,metal ion binding; GO:0061630,ubiquitin protein ligase activity; GO:0043161,proteasome-mediated ubiquitin-dependent protein catabolic process
Capana00g002739	1130.06	3076.9	1.44411	2.90916e-09	up	--
Capana00g002533	15.4014	120.454	2.97695	3.04474e-09	up	--
Capana00g001718	56.5793	224.325	1.99552	3.05278e-09	up	--
Capana02g000372	156.517	361.302	1.20475	3.06961e-09	up	--
Capana07g002003	1577.32	4045.07	1.35795	3.11706e-09	up	GO:0004364,glutathione transferase activity; GO:0009734,auxin-activated signaling pathway
Capana10g002398	400.906	1170.85	1.54877	3.26729e-09	up	GO:0005886,plasma membrane; GO:0043531,ADP binding; GO:0005524,ATP binding; GO:0006952,defense response; GO:0007165,signal transduction
Capana03g001085	712.063	1829.42	1.3626	3.30485e-09	up	--
Capana01g001241	146.779	406.403	1.46425	3.4092e-09	up	GO:0005737,cytoplasm; GO:0005524,ATP binding; GO:0051082,unfolded protein binding; GO:0006457,protein folding; GO:0006950,response to stress
Capana07g001870	40.8034	327.967	2.99715	3.43614e-09	up	GO:0016021,integral component of membrane; GO:0020037,heme binding; GO:0005506,iron ion binding; GO:0004497,monooxygenase activity; GO:0016705,oxidoreductase activity, acting on paired donors, with incorporation or reduction of molecular oxygen
Capana01g001221	129.979	517.518	1.98666	3.46551e-09	up	GO:0009507,chloroplast; GO:0005739,mitochondrion; GO:0003677,DNA binding; GO:0003913,DNA photolyase activity; GO:0006281,DNA repair; GO:0018298,protein-chromophore linkage
Capana02g003199	67.0419	272.922	2.03122	3.47167e-09	up	GO:0005634,nucleus; GO:0003677,DNA binding; GO:0003700,DNA binding transcription factor activity; GO:0008270,zinc ion binding; GO:0009658,chloroplast organization; GO:0009909,regulation of flower development; GO:0009416,response to light stimulus; GO:0006351,transcription, DNA-templated
Capana10g000111	46.0395	217.926	2.25261	3.65609e-09	up	GO:0016021,integral component of membrane; GO:0015297,antiporter activity; GO:0015238,drug transmembrane transporter activity; GO:0006855,drug transmembrane transport; GO:0009636,response to toxic substance
Capana06g000179	0.248892	142.095	8.76432	3.76019e-09	up	GO:0047763,caffeate O-methyltransferase activity; GO:0046983,protein dimerization activity; GO:0009809,lignin biosynthetic process
Capana06g000431	1121.18	2708.62	1.27285	3.82374e-09	up	GO:0046872,metal ion binding; GO:0016740,transferase activity; GO:0016567,protein ubiquitination
Capana03g001818	572.316	1181.61	1.04669	4.83045e-09	up	GO:0005634,nucleus; GO:0000160,phosphorelay signal transduction system; GO:0006355,regulation of transcription, DNA-templated; GO:0048511,rhythmic process; GO:0006351,transcription, DNA-templated
Capana00g001023	3.69486	57.4828	3.98237	4.85203e-09	up	--
Capana09g002413	374.774	1833.44	2.29273	4.85375e-09	up	GO:0009570,chloroplast stroma; GO:0005783,endoplasmic reticulum; GO:0004089,carbonate dehydratase activity; GO:0008270,zinc ion binding; GO:0006730,one-carbon metabolic process
Capana06g002546	125.782	272.946	1.11724	5.0984e-09	up	GO:0005783,endoplasmic reticulum; GO:0005789,endoplasmic reticulum membrane; GO:0000139,Golgi membrane; GO:0016021,integral component of membrane; GO:0004559,alpha-mannosidase activity; GO:0005509,calcium ion binding; GO:0004571,mannosyl-oligosaccharide 1,2-alpha-mannosidase activity; GO:0006491,N-glycan processing; GO:0006486,protein glycosylation; GO:0030433,ubiquitin-dependent ERAD pathway
Capana08g001522	4.56621	85.1419	4.18839	5.21861e-09	up	GO:0005788,endoplasmic reticulum lumen; GO:0005524,ATP binding
Capana03g000552	20.5041	5169.23	7.96927	5.55671e-09	up	GO:0005524,ATP binding
Capana03g004583	76.7085	236.859	1.62471	5.68691e-09	up	GO:0005634,nucleus; GO:0004842,ubiquitin-protein transferase activity; GO:0031146,SCF-dependent proteasomal ubiquitin-dependent protein catabolic process
Capana12g000120	655.768	1445.29	1.13993	6.10128e-09	up	--
Capana01g003333	48.6641	167.584	1.77457	6.31363e-09	up	GO:0005777,peroxisome; GO:0003860,3-hydroxyisobutyryl-CoA hydrolase activity; GO:0009409,response to cold; GO:0006574,valine catabolic process
Capana08g000899	70.2985	314.215	2.16348	6.35209e-09	up	GO:0005886,plasma membrane; GO:0048032,galacturonate binding; GO:0007267,cell-cell signaling
Capana12g002765	66.8641	193.965	1.53494	6.41573e-09	up	--
Capana11g000041	306.363	627.754	1.03154	7.00052e-09	up	GO:0019887,protein kinase regulator activity; GO:0005975,carbohydrate metabolic process; GO:0043562,cellular response to nitrogen levels; GO:0009744,response to sucrose
Capana01g003313	540.335	2764	2.35318	7.40955e-09	up	GO:0048046,apoplast; GO:0005618,cell wall; GO:0004553,hydrolase activity, hydrolyzing O-glycosyl compounds; GO:0016762,xyloglucan:xyloglucosyl transferase activity; GO:0042546,cell wall biogenesis; GO:0071555,cell wall organization; GO:0010411,xyloglucan metabolic process
Capana07g001988	274.303	664.063	1.27266	7.91648e-09	up	GO:0016021,integral component of membrane; GO:0009705,plant-type vacuole membrane; GO:0015369,calcium:proton antiporter activity
Capana02g002049	38.431	282.868	2.87475	7.96189e-09	up	GO:0005634,nucleus; GO:0016567,protein ubiquitination
Capana08g002180	10.7217	124.049	3.51751	8.38575e-09	up	GO:0009793,embryo development ending in seed dormancy
Capana03g000650	202.076	992.913	2.29969	8.65337e-09	up	GO:0005737,cytoplasm; GO:0005739,mitochondrion; GO:0005634,nucleus; GO:0016818,hydrolase activity, acting on acid anhydrides, in phosphorus-containing anhydrides; GO:0046872,metal ion binding
Capana00g003598	3.90614	696.288	7.50403	8.91529e-09	up	--
Capana02g002704	222.044	503.979	1.18352	9.12944e-09	up	--
Capana05g001819	286.698	726.741	1.33964	9.23148e-09	up	GO:0005737,cytoplasm; GO:0009055,electron transfer activity; GO:0015035,protein disulfide oxidoreductase activity; GO:0045454,cell redox homeostasis
Capana11g000540	0	46.9511	8.12688	9.40305e-09	up	GO:0009507,chloroplast; GO:0016787,hydrolase activity
Capana03g003209	49.535	178.831	1.84587	9.41519e-09	up	GO:0005739,mitochondrion; GO:0016788,hydrolase activity, acting on ester bonds; GO:0046872,metal ion binding; GO:0050313,sulfur dioxygenase activity; GO:0009793,embryo development ending in seed dormancy; GO:0009960,endosperm development; GO:0009651,response to salt stress; GO:0048316,seed development
Capana06g000460	26.8924	170.719	2.68326	9.75855e-09	up	GO:0005634,nucleus; GO:0003700,DNA binding transcription factor activity; GO:0000981,RNA polymerase II transcription factor activity, sequence-specific DNA binding; GO:0043565,sequence-specific DNA binding; GO:0001135,transcription factor activity, RNA polymerase II transcription factor recruiting; GO:0044212,transcription regulatory region DNA binding; GO:0030154,cell differentiation; GO:0006357…
Capana12g000095	20.4273	102.491	2.34322	9.86828e-09	up	GO:0016021,integral component of membrane; GO:0005743,mitochondrial inner membrane; GO:0022857,transmembrane transporter activity
Capana03g002001	319.671	661.754	1.04909	9.97221e-09	up	GO:0000419,DNA-directed RNA polymerase V complex; GO:0042803,protein homodimerization activity; GO:0006306,DNA methylation; GO:0031047,gene silencing by RNA; GO:0070921,regulation of production of siRNA involved in chromatin silencing by small RNA; GO:0080188,RNA-directed DNA methylation
Capana01g004371	111.73	332.132	1.57678	1.03234e-08	up	GO:0009507,chloroplast; GO:0047714,galactolipase activity; GO:0008970,phosphatidylcholine 1-acylhydrolase activity; GO:0004806,triglyceride lipase activity; GO:0016042,lipid catabolic process
Capana09g000281	1960.84	4031.78	1.03996	1.0738e-08	up	GO:0005737,cytoplasm; GO:0005634,nucleus; GO:0005524,ATP binding; GO:0004674,protein serine/threonine kinase activity; GO:0009785,blue light signaling pathway; GO:0006897,endocytosis; GO:0018105,peptidyl-serine phosphorylation; GO:0009640,photomorphogenesis; GO:0008360,regulation of cell shape; GO:0009637,response to blue light
Capana08g001016	478.756	1866.29	1.96374	1.09429e-08	up	GO:0030246,carbohydrate binding; GO:0047938,glucose-6-phosphate 1-epimerase activity; GO:0005975,carbohydrate metabolic process
Capana00g004157	288.222	795.803	1.46494	1.12624e-08	up	--
Capana12g002356	125.114	307.491	1.30007	1.14349e-08	up	GO:0005737,cytoplasm; GO:0043531,ADP binding; GO:0005524,ATP binding; GO:0009626,plant-type hypersensitive response; GO:0007165,signal transduction
Capana10g000544	4.06842	65.876	3.99418	1.14578e-08	up	--
Capana03g001537	3.465	53.4611	3.91136	1.21174e-08	up	GO:0005634,nucleus; GO:0003677,DNA binding; GO:0003700,DNA binding transcription factor activity; GO:0000981,RNA polymerase II transcription factor activity, sequence-specific DNA binding; GO:0043565,sequence-specific DNA binding; GO:0001135,transcription factor activity, RNA polymerase II transcription factor recruiting; GO:0044212,transcription regulatory region DNA binding; GO:0030154,cell dif…
Capana01g000154	46.8938	296.795	2.65121	1.23147e-08	up	GO:0016021,integral component of membrane; GO:0000325,plant-type vacuole; GO:0005774,vacuolar membrane; GO:0005524,ATP binding; GO:0042626,ATPase activity, coupled to transmembrane movement of substances; GO:0008559,xenobiotic transmembrane transporting ATPase activity; GO:0055085,transmembrane transport
Capana11g000594	560.096	1175.19	1.07147	1.25339e-08	up	GO:0005737,cytoplasm; GO:0005634,nucleus; GO:0005524,ATP binding; GO:0004519,endonuclease activity; GO:0016301,kinase activity; GO:0046872,metal ion binding; GO:0003729,mRNA binding; GO:0003972,RNA ligase (ATP) activity; GO:0009734,auxin-activated signaling pathway; GO:0010928,regulation of auxin mediated signaling pathway; GO:0042245,RNA repair; GO:0006412,translation; GO:0006388,tRNA splicing, …
Capana08g002370	230.174	556.262	1.27707	1.28121e-08	up	GO:0005768,endosome; GO:0005794,Golgi apparatus; GO:0032580,Golgi cisterna membrane; GO:0016021,integral component of membrane; GO:0005802,trans-Golgi network; GO:0008417,fucosyltransferase activity; GO:0071555,cell wall organization; GO:0006486,protein glycosylation
Capana00g004141	152.422	417.881	1.4502	1.28407e-08	up	--
Capana02g002536	1.11979	103.035	6.4562	1.29742e-08	up	GO:0005576,extracellular region; GO:0016788,hydrolase activity, acting on ester bonds; GO:0042335,cuticle development; GO:0016042,lipid catabolic process
Capana11g001709	3672.47	7829.09	1.09216	1.30144e-08	up	GO:0003723,RNA binding; GO:0003968,RNA-directed 5'-3' RNA polymerase activity; GO:0006952,defense response; GO:0060148,positive regulation of posttranscriptional gene silencing; GO:0030422,production of siRNA involved in RNA interference; GO:0009751,response to salicylic acid; GO:0009615,response to virus; GO:0010025,wax biosynthetic process
Capana02g002641	43.519	384.901	3.14252	1.36741e-08	up	--
Capana01g002735	21.24	96.3817	2.17806	1.39077e-08	up	--
Capana02g001582	590.501	1193.9	1.01732	1.40538e-08	up	GO:0016021,integral component of membrane; GO:0005743,mitochondrial inner membrane; GO:0005744,mitochondrial inner membrane presequence translocase complex; GO:0005739,mitochondrion; GO:0004721,phosphoprotein phosphatase activity; GO:0030150,protein import into mitochondrial matrix
Capana04g000213	5706.79	13825	1.2766	1.47044e-08	up	GO:0005829,cytosol; GO:0033926,glycopeptide alpha-N-acetylgalactosaminidase activity; GO:0004575,sucrose alpha-glucosidase activity; GO:0005975,carbohydrate metabolic process
Capana02g003004	23.75	143.989	2.60192	1.47101e-08	up	GO:0005829,cytosol; GO:0005634,nucleus; GO:0016787,hydrolase activity; GO:0009704,de-etiolation; GO:0009640,photomorphogenesis; GO:0080167,response to karrikin
Capana05g002563	3670.01	7805.09	1.08884	1.4827e-08	up	--
Capana06g002058	185.833	378.3	1.02796	1.51271e-08	up	GO:0005737,cytoplasm; GO:0005634,nucleus; GO:0003700,DNA binding transcription factor activity; GO:0043565,sequence-specific DNA binding; GO:0006351,transcription, DNA-templated
Capana03g001940	628.681	1298.22	1.04589	1.59863e-08	up	GO:0009535,chloroplast thylakoid membrane; GO:0005783,endoplasmic reticulum; GO:0005789,endoplasmic reticulum membrane; GO:0016021,integral component of membrane; GO:0005886,plasma membrane; GO:0005774,vacuolar membrane; GO:0005773,vacuole; GO:0020037,heme binding; GO:0046872,metal ion binding; GO:0055114,oxidation-reduction process
Capana12g000205	211.815	486.502	1.19525	1.60479e-08	up	--
Capana12g000112	39.8394	131.497	1.7222	1.69506e-08	up	GO:0005634,nucleus; GO:0003700,DNA binding transcription factor activity; GO:0043565,sequence-specific DNA binding; GO:0000989,transcription factor activity, transcription factor binding; GO:0006355,regulation of transcription, DNA-templated; GO:0009739,response to gibberellin; GO:0006351,transcription, DNA-templated
Capana03g004213	1739.24	6326.13	1.86281	1.71454e-08	up	GO:0031225,anchored component of membrane; GO:0046658,anchored component of plasma membrane; GO:0005886,plasma membrane; GO:0004190,aspartic-type endopeptidase activity; GO:0030163,protein catabolic process; GO:0006508,proteolysis
Capana00g003384	1.11979	73.6467	5.9667	1.79985e-08	up	--
Capana12g001450	71.536	188.06	1.39177	1.86439e-08	up	--
Capana02g002353	6.95786	124.177	4.13705	1.95065e-08	up	GO:0016021,integral component of membrane; GO:0005886,plasma membrane; GO:0005524,ATP binding; GO:0042626,ATPase activity, coupled to transmembrane movement of substances
Capana02g003667	101.653	258.375	1.34437	1.97812e-08	up	GO:0009507,chloroplast; GO:0043231,intracellular membrane-bounded organelle; GO:0004519,endonuclease activity; GO:0003723,RNA binding; GO:0009451,RNA modification
Capana03g004555	222.654	456.098	1.03059	2.00082e-08	up	GO:0000419,DNA-directed RNA polymerase V complex; GO:0003899,DNA-directed 5'-3' RNA polymerase activity; GO:0003697,single-stranded DNA binding; GO:0003727,single-stranded RNA binding; GO:0006351,transcription, DNA-templated
Capana03g004124	123.943	1757.19	3.82364	2.07248e-08	up	--
Capana03g000080	0.311001	121.844	8.54045	2.20787e-08	up	--
Capana06g000459	30.6846	271.995	3.15387	2.28277e-08	up	--
Capana02g001665	363.597	785.17	1.11092	2.34809e-08	up	GO:0005737,cytoplasm; GO:0005634,nucleus; GO:0003700,DNA binding transcription factor activity; GO:0042803,protein homodimerization activity; GO:0043565,sequence-specific DNA binding; GO:0045893,positive regulation of transcription, DNA-templated; GO:0006355,regulation of transcription, DNA-templated; GO:0010200,response to chitin; GO:0000302,response to reactive oxygen species; GO:0006351,transc…
Capana09g000004	7.37114	105.541	3.8545	2.46618e-08	up	GO:0005737,cytoplasm; GO:0016020,membrane; GO:0043531,ADP binding; GO:0005524,ATP binding; GO:0009626,plant-type hypersensitive response
Capana04g000929	327.874	799.299	1.2835	2.49379e-08	up	GO:0016021,integral component of membrane; GO:0015297,antiporter activity; GO:0015238,drug transmembrane transporter activity; GO:0006855,drug transmembrane transport
Capana12g001400	6.97353	66.0893	3.22136	2.54863e-08	up	--
Capana08g002229	148.429	313.966	1.08386	2.55337e-08	up	GO:0016020,membrane; GO:0005634,nucleus; GO:0003684,damaged DNA binding; GO:0003887,DNA-directed DNA polymerase activity; GO:0046872,metal ion binding; GO:0003697,single-stranded DNA binding; GO:0006281,DNA repair; GO:0006260,DNA replication
Capana06g001068	383.278	2032.5	2.40462	2.56507e-08	up	--
Capana12g000014	0.622001	79.0918	7.02748	2.68401e-08	up	GO:0016021,integral component of membrane; GO:0016020,membrane
Capana03g004195	0.248892	60.7719	7.53907	2.69803e-08	up	GO:0016021,integral component of membrane; GO:0005886,plasma membrane; GO:0005524,ATP binding; GO:0016887,ATPase activity; GO:0006952,defense response
Capana03g002831	164.248	349.406	1.09001	2.69887e-08	up	--
Capana05g000172	371.519	3402.63	3.19409	2.76849e-08	up	GO:0005618,cell wall; GO:0005576,extracellular region; GO:0004869,cysteine-type endopeptidase inhibitor activity; GO:0002020,protease binding; GO:0034605,cellular response to heat; GO:0006952,defense response; GO:2000117,negative regulation of cysteine-type endopeptidase activity; GO:0010030,positive regulation of seed germination
Capana07g002260	5.03903	466.509	6.51018	2.8212e-08	up	GO:0005886,plasma membrane; GO:0005524,ATP binding; GO:0005516,calmodulin binding; GO:0030246,carbohydrate binding; GO:0004674,protein serine/threonine kinase activity; GO:0006468,protein phosphorylation; GO:0048544,recognition of pollen
Capana01g001021	151.188	324.797	1.10357	2.95039e-08	up	GO:0016021,integral component of membrane; GO:0005886,plasma membrane; GO:0005524,ATP binding; GO:0004674,protein serine/threonine kinase activity
Capana00g002740	102.851	253.212	1.30346	3.00882e-08	up	--
Capana10g000375	92.5256	401.852	2.11219	3.06537e-08	up	GO:0009507,chloroplast; GO:0015035,protein disulfide oxidoreductase activity; GO:0045454,cell redox homeostasis; GO:0006662,glycerol ether metabolic process
Capana02g001669	0	43.1252	8.00391	3.42546e-08	up	--
Capana07g002444	99.6077	322.412	1.70093	3.62446e-08	up	--
Capana04g002367	251.747	601.004	1.25758	3.62518e-08	up	GO:0016021,integral component of membrane; GO:0005886,plasma membrane; GO:0005524,ATP binding; GO:0004674,protein serine/threonine kinase activity
Capana10g001278	303.545	683.467	1.16921	3.67761e-08	up	--
Capana07g001246	629.352	1259.56	1.00035	3.99203e-08	up	--
Capana06g000932	340.839	1095.98	1.68437	4.0748e-08	up	--
Capana08g002098	0	67.3343	8.64627	4.1303e-08	up	--
Capana07g001960	1617.72	3391.41	1.06699	4.19987e-08	up	GO:0003723,RNA binding
Capana03g003115	1529.93	3131.24	1.0337	4.2041e-08	up	GO:0009507,chloroplast; GO:0009534,chloroplast thylakoid; GO:0009535,chloroplast thylakoid membrane; GO:0016021,integral component of membrane
Capana10g000311	0	57.934	8.43229	4.21202e-08	up	--
Capana04g002283	421.985	919.84	1.12651	4.26837e-08	up	--
Capana03g004571	68.8795	254.583	1.87796	4.67389e-08	up	--
Capana00g002189	72.0852	225.221	1.64431	4.72632e-08	up	--
Capana06g000604	19.0668	116.27	2.58907	4.75296e-08	up	GO:0005634,nucleus; GO:0003700,DNA binding transcription factor activity; GO:0042803,protein homodimerization activity; GO:0043565,sequence-specific DNA binding; GO:0048653,anther development; GO:0071588,hydrogen peroxide mediated signaling pathway; GO:0002237,response to molecule of bacterial origin; GO:0006351,transcription, DNA-templated
Capana01g002824	15.3842	892.035	5.85442	4.82309e-08	up	GO:0005737,cytoplasm; GO:0047216,inositol 3-alpha-galactosyltransferase activity; GO:0046872,metal ion binding; GO:0070417,cellular response to cold; GO:0071465,cellular response to desiccation; GO:0006012,galactose metabolic process
Capana12g002326	237.102	483.86	1.03242	4.87337e-08	up	--
Capana03g003736	17.8384	196.57	3.45167	4.89097e-08	up	GO:0016021,integral component of membrane; GO:0005886,plasma membrane; GO:0009506,plasmodesma; GO:0005355,glucose transmembrane transporter activity; GO:0005358,high-affinity glucose:proton symporter activity; GO:0005351,carbohydrate:proton symporter activity; GO:0046323,glucose import; GO:0035428,NA; GO:0009737,response to abscisic acid; GO:0009651,response to salt stress; GO:0009414,response to…
Capana02g001490	4.04893	507.438	7.00191	5.019e-08	up	GO:0005634,nucleus; GO:0003700,DNA binding transcription factor activity; GO:0043565,sequence-specific DNA binding; GO:0045892,negative regulation of transcription, DNA-templated; GO:0009408,response to heat; GO:0006351,transcription, DNA-templated
Capana00g002633	22.3788	197.908	3.13992	5.14843e-08	up	--
Capana02g001642	3.71434	139.175	5.16457	5.41686e-08	up	GO:0005634,nucleus; GO:0003700,DNA binding transcription factor activity; GO:0043565,sequence-specific DNA binding; GO:0006351,transcription, DNA-templated
Capana02g001734	28.3351	237.004	3.05638	5.56503e-08	up	--
Capana08g002701	6020.06	19966	1.72974	5.62497e-08	up	GO:0003677,DNA binding; GO:0003723,RNA binding; GO:0008270,zinc ion binding; GO:0006355,regulation of transcription, DNA-templated
Capana12g001288	79.2801	322.069	2.02985	5.7077e-08	up	GO:0005887,integral component of plasma membrane; GO:0008271,secondary active sulfate transmembrane transporter activity; GO:0015116,sulfate transmembrane transporter activity; GO:0015293,symporter activity
Capana04g002116	86.3353	206.056	1.25064	5.83175e-08	up	GO:0009507,chloroplast; GO:0009706,chloroplast inner membrane; GO:0009535,chloroplast thylakoid membrane; GO:0042651,thylakoid membrane; GO:0051537,2 iron, 2 sulfur cluster binding; GO:0010277,chlorophyllide a oxygenase [overall] activity; GO:0005506,iron ion binding; GO:0016705,oxidoreductase activity, acting on paired donors, with incorporation or reduction of molecular oxygen; GO:0015995,chlor…
Capana01g000949	92.1862	259.944	1.49188	5.85525e-08	up	GO:0043231,intracellular membrane-bounded organelle; GO:0004519,endonuclease activity; GO:0003723,RNA binding; GO:0009451,RNA modification
Capana03g002761	0	39.2906	7.87043	5.9581e-08	up	--
Capana04g001643	16.3598	119.993	2.88092	6.0766e-08	up	GO:0004556,alpha-amylase activity; GO:0103025,alpha-amylase activity (releasing maltohexaose); GO:0005509,calcium ion binding; GO:0005975,carbohydrate metabolic process
Capana05g001546	133.416	330.788	1.31558	6.11867e-08	up	GO:0016021,integral component of membrane; GO:0016192,vesicle-mediated transport
Capana12g002160	250	729.667	1.54495	6.19858e-08	up	--
Capana06g002474	182.78	553.499	1.60049	6.66864e-08	up	GO:0016021,integral component of membrane; GO:0005886,plasma membrane; GO:0005524,ATP binding; GO:0005516,calmodulin binding; GO:0030246,carbohydrate binding; GO:0004674,protein serine/threonine kinase activity; GO:0006468,protein phosphorylation; GO:0048544,recognition of pollen
Capana04g000471	0	39.5546	7.88083	6.68044e-08	up	GO:0016020,membrane; GO:0020037,heme binding; GO:0005506,iron ion binding; GO:0016709,oxidoreductase activity, acting on paired donors, with incorporation or reduction of molecular oxygen, NAD(P)H as one donor, and incorporation of one atom of oxygen; GO:0044550,secondary metabolite biosynthetic process
Capana02g003576	271.384	600.674	1.146	6.78893e-08	up	--
Capana08g001909	2831.38	6269.88	1.14746	6.8728e-08	up	GO:0005789,endoplasmic reticulum membrane; GO:0005887,integral component of plasma membrane; GO:0009506,plasmodesma; GO:0042802,identical protein binding; GO:0005249,voltage-gated potassium channel activity; GO:0034765,regulation of ion transmembrane transport; GO:0042391,regulation of membrane potential; GO:0009737,response to abscisic acid
Capana01g000194	737.237	2347.02	1.66912	7.03696e-08	up	GO:0005829,cytosol; GO:0005634,nucleus; GO:0009506,plasmodesma; GO:0003677,DNA binding; GO:0003700,DNA binding transcription factor activity; GO:0006351,transcription, DNA-templated
Capana03g001723	20.5415	120.488	2.53023	7.11152e-08	up	GO:0000325,plant-type vacuole; GO:0005509,calcium ion binding; GO:0043269,regulation of ion transport
Capana07g002229	100.126	266.122	1.40535	7.12447e-08	up	GO:0003677,DNA binding; GO:0016491,oxidoreductase activity; GO:0051568,histone H3-K4 methylation; GO:0006355,regulation of transcription, DNA-templated; GO:0006351,transcription, DNA-templated
Capana01g001941	89.0177	245.516	1.46768	7.41209e-08	up	--
Capana08g000136	240.273	1073.5	2.15647	7.45245e-08	up	GO:0005811,lipid droplet; GO:0046872,metal ion binding; GO:1990137,plant seed peroxidase activity; GO:0009819,drought recovery; GO:0009737,response to abscisic acid
Capana05g002549	266.227	682.988	1.35971	7.69669e-08	up	GO:0009941,chloroplast envelope; GO:0009535,chloroplast thylakoid membrane; GO:0016021,integral component of membrane; GO:0009522,photosystem I; GO:0009523,photosystem II; GO:0010287,plastoglobule; GO:0016168,chlorophyll binding; GO:0046872,metal ion binding; GO:0031409,pigment binding; GO:0009768,photosynthesis, light harvesting in photosystem I; GO:0018298,protein-chromophore linkage; GO:000941…
Capana02g002796	639.978	1398.65	1.12964	8.07551e-08	up	GO:0009570,chloroplast stroma; GO:0030529,NA; GO:0004045,aminoacyl-tRNA hydrolase activity; GO:0006397,mRNA processing; GO:0008380,RNA splicing
Capana10g001663	271.996	556.125	1.03306	8.10057e-08	up	GO:0009507,chloroplast; GO:0008106,alcohol dehydrogenase (NADP+) activity; GO:0004033,aldo-keto reductase (NADP) activity; GO:0070401,NADP+ binding; GO:0016229,steroid dehydrogenase activity; GO:0055114,oxidation-reduction process; GO:0009409,response to cold; GO:0009651,response to salt stress; GO:0009636,response to toxic substance; GO:0009414,response to water deprivation
Capana05g000331	6.40771	871.053	7.07117	8.28037e-08	up	GO:0050664,oxidoreductase activity, acting on NAD(P)H, oxygen as acceptor; GO:0009807,lignan biosynthetic process
Capana01g000752	522.41	1539.34	1.56089	9.11599e-08	up	GO:0048046,apoplast; GO:0005829,cytosol; GO:0005634,nucleus; GO:0005524,ATP binding; GO:0004127,cytidylate kinase activity; GO:0009041,uridylate kinase activity; GO:0006207,'de novo' pyrimidine nucleobase biosynthetic process; GO:0006221,pyrimidine nucleotide biosynthetic process; GO:0009173,pyrimidine ribonucleoside monophosphate metabolic process
Capana00g003685	22.6212	339.791	3.92695	9.66692e-08	up	--
Capana03g003618	100.745	339.503	1.75378	1.01299e-07	up	GO:0008422,beta-glucosidase activity; GO:0102483,scopolin beta-glucosidase activity; GO:0005975,carbohydrate metabolic process; GO:1901657,glycosyl compound metabolic process
Capana10g000278	3.09189	126.987	5.32497	1.02251e-07	up	GO:0016021,integral component of membrane; GO:0020037,heme binding; GO:0005506,iron ion binding; GO:0004497,monooxygenase activity; GO:0016705,oxidoreductase activity, acting on paired donors, with incorporation or reduction of molecular oxygen
Capana01g000691	19.4941	169.969	3.102	1.03012e-07	up	GO:0071949,FAD binding; GO:0004497,monooxygenase activity; GO:0002239,response to oomycetes; GO:0044550,secondary metabolite biosynthetic process
Capana05g000114	266.149	651.168	1.28958	1.0537e-07	up	GO:0050662,coenzyme binding; GO:0016491,oxidoreductase activity; GO:0009813,flavonoid biosynthetic process
Capana05g000769	82.1865	213.794	1.38435	1.07941e-07	up	GO:0005737,cytoplasm; GO:0005886,plasma membrane; GO:0043531,ADP binding; GO:0005524,ATP binding; GO:0009814,defense response, incompatible interaction; GO:0009626,plant-type hypersensitive response; GO:0007165,signal transduction
Capana11g001371	30.2375	140.605	2.22094	1.11636e-07	up	GO:0005737,cytoplasm; GO:0004365,glyceraldehyde-3-phosphate dehydrogenase (NAD+) (phosphorylating) activity; GO:0051287,NAD binding; GO:0050661,NADP binding; GO:0006006,glucose metabolic process; GO:0006096,glycolytic process
Capana04g002562	75.6459	245.585	1.69687	1.12412e-07	up	GO:0016021,integral component of membrane; GO:0005886,plasma membrane; GO:0005524,ATP binding; GO:0004674,protein serine/threonine kinase activity; GO:0042742,defense response to bacterium; GO:0006468,protein phosphorylation
Capana02g003670	35.627	159.915	2.15069	1.14293e-07	up	GO:0005634,nucleus; GO:0000989,transcription factor activity, transcription factor binding; GO:0009740,gibberellic acid mediated signaling pathway; GO:0006355,regulation of transcription, DNA-templated; GO:0006351,transcription, DNA-templated
Capana11g002083	17.7475	100.753	2.49785	1.15868e-07	up	GO:0005737,cytoplasm; GO:0012505,endomembrane system; GO:0016020,membrane; GO:0005634,nucleus; GO:0061630,ubiquitin protein ligase activity; GO:0004842,ubiquitin-protein transferase activity; GO:0009738,abscisic acid-activated signaling pathway; GO:0016567,protein ubiquitination; GO:0009787,regulation of abscisic acid-activated signaling pathway; GO:0010029,regulation of seed germination; GO:0010…
Capana08g002449	6.26018	93.6382	3.94911	1.16401e-07	up	GO:0016298,lipase activity; GO:0080031,methyl salicylate esterase activity; GO:0009862,systemic acquired resistance, salicylic acid mediated signaling pathway
Capana03g001594	180.323	800.512	2.15024	1.17627e-07	up	GO:0005783,endoplasmic reticulum; GO:0005794,Golgi apparatus; GO:0005886,plasma membrane; GO:0009506,plasmodesma; GO:0003846,2-acylglycerol O-acyltransferase activity; GO:0090430,caffeoyl-CoA: alcohol caffeoyl transferase activity; GO:0016787,hydrolase activity; GO:0004622,lysophospholipase activity; GO:0009809,lignin biosynthetic process; GO:0006629,lipid metabolic process; GO:0046686,response t…
Capana04g000388	381.166	774.813	1.02112	1.24817e-07	up	GO:0005634,nucleus; GO:0003700,DNA binding transcription factor activity; GO:0046872,metal ion binding; GO:0044212,transcription regulatory region DNA binding; GO:0009937,regulation of gibberellic acid mediated signaling pathway; GO:0010029,regulation of seed germination; GO:0006355,regulation of transcription, DNA-templated; GO:0010431,seed maturation; GO:0006351,transcription, DNA-templated
Capana01g000405	73.5221	204.241	1.4659	1.27514e-07	up	--
Capana12g002864	150.417	521.5	1.79244	1.3123e-07	up	GO:0005737,cytoplasm; GO:0005634,nucleus; GO:0003700,DNA binding transcription factor activity; GO:0043565,sequence-specific DNA binding; GO:0006351,transcription, DNA-templated
Capana02g003485	1070.24	2248.65	1.07138	1.35439e-07	up	GO:0005634,nucleus; GO:0003700,DNA binding transcription factor activity; GO:0042803,protein homodimerization activity; GO:0043565,sequence-specific DNA binding; GO:0009965,leaf morphogenesis; GO:0045893,positive regulation of transcription, DNA-templated; GO:0009637,response to blue light; GO:0009651,response to salt stress; GO:0006351,transcription, DNA-templated
Capana09g002358	5.43664	52.9243	3.28535	1.36854e-07	up	--
Capana03g004458	223.872	482.173	1.10858	1.3785e-07	up	GO:0009507,chloroplast; GO:0032300,mismatch repair complex; GO:0005739,mitochondrion; GO:0009536,plastid; GO:0042651,thylakoid membrane; GO:0005524,ATP binding; GO:0003684,damaged DNA binding; GO:0003677,DNA binding; GO:0008094,DNA-dependent ATPase activity; GO:0000404,heteroduplex DNA loop binding; GO:0043570,maintenance of DNA repeat elements; GO:0006298,mismatch repair; GO:0032042,mitochondria…
Capana00g002289	67.5115	169.645	1.32712	1.61073e-07	up	--
Capana03g001954	49.3782	188.144	1.93254	1.67806e-07	up	--
Capana03g002839	1.11979	45.6642	5.27224	1.68505e-07	up	--
Capana02g001395	896.513	2243.9	1.32334	1.69981e-07	up	--
Capana00g004655	708.285	6307.09	3.15516	1.72572e-07	up	--
Capana07g001261	41.8156	152.135	1.87342	1.73474e-07	up	GO:0005737,cytoplasm; GO:0005634,nucleus; GO:0016442,RISC complex; GO:0046872,metal ion binding; GO:0004525,ribonuclease III activity; GO:0003723,RNA binding; GO:0030422,production of siRNA involved in RNA interference
Capana08g001327	4.95835	96.4062	4.23588	1.74041e-07	up	GO:0005737,cytoplasm; GO:0004124,cysteine synthase activity; GO:0030170,pyridoxal phosphate binding; GO:0016740,transferase activity; GO:0006535,cysteine biosynthetic process from serine
Capana05g001383	43.8688	137.947	1.66233	1.76865e-07	up	--
Capana00g002166	173.652	527.632	1.60577	1.78654e-07	up	--
Capana09g002325	723.189	1718.27	1.24811	1.8297e-07	up	GO:0016021,integral component of membrane
Capana02g001292	1.24446	73.4858	5.71676	1.83627e-07	up	GO:0016021,integral component of membrane; GO:0005886,plasma membrane; GO:0005385,zinc ion transmembrane transporter activity; GO:0071577,zinc ion transmembrane transport
Capana03g003098	187.029	483.835	1.36738	1.85972e-07	up	GO:0010008,endosome membrane; GO:0005794,Golgi apparatus; GO:0016021,integral component of membrane; GO:0031902,late endosome membrane; GO:0031201,SNARE complex; GO:0005773,vacuole; GO:0005484,SNAP receptor activity; GO:0000149,SNARE binding; GO:0006886,intracellular protein transport; GO:0048278,vesicle docking; GO:0006906,vesicle fusion; GO:0016192,vesicle-mediated transport
Capana01g000581	123.698	294.139	1.24632	1.86729e-07	up	GO:0016021,integral component of membrane; GO:0046872,metal ion binding; GO:0016757,transferase activity, transferring glycosyl groups; GO:0006486,protein glycosylation
Capana01g003196	544.851	1137.12	1.06072	1.91871e-07	up	GO:0005789,endoplasmic reticulum membrane; GO:0016021,integral component of membrane; GO:0005886,plasma membrane; GO:0032586,protein storage vacuole membrane
Capana04g000651	182.392	419.441	1.20617	1.91979e-07	up	--
Capana03g001527	527.615	1190.74	1.17264	1.99846e-07	up	GO:0009535,chloroplast thylakoid membrane; GO:0005887,integral component of plasma membrane; GO:0005516,calmodulin binding; GO:0030552,cAMP binding; GO:0030553,cGMP binding; GO:0005249,voltage-gated potassium channel activity; GO:0042391,regulation of membrane potential; GO:0009624,response to nematode
Capana06g002190	149.594	331.63	1.14801	2.00013e-07	up	--
Capana07g001575	240.114	1012.99	2.07763	2.00137e-07	up	GO:0005509,calcium ion binding; GO:0009733,response to auxin
Capana09g002411	31.5509	192.421	2.60814	2.12746e-07	up	GO:0005886,plasma membrane
Capana12g002758	263.744	1074.78	2.02957	2.20849e-07	up	GO:0102311,8-hydroxygeraniol dehydrogenase activity; GO:0008270,zinc ion binding
Capana11g001529	18.6713	96.5181	2.36376	2.238e-07	up	--
Capana03g003475	32.0192	168.554	2.38244	2.35002e-07	up	GO:0005737,cytoplasm; GO:0005634,nucleus; GO:0005886,plasma membrane; GO:0005524,ATP binding; GO:0051020,GTPase binding; GO:0004675,transmembrane receptor protein serine/threonine kinase activity; GO:0007166,cell surface receptor signaling pathway; GO:0006468,protein phosphorylation
Capana07g000152	244.37	579.262	1.24661	2.37923e-07	up	--
Capana02g002033	254.052	528.526	1.06063	2.4539e-07	up	GO:0009705,plant-type vacuole membrane; GO:0005773,vacuole; GO:0005524,ATP binding; GO:0017050,D-erythro-sphingosine kinase activity; GO:0003951,NAD+ kinase activity; GO:0008481,sphinganine kinase activity; GO:0071215,cellular response to abscisic acid stimulus; GO:0009737,response to abscisic acid; GO:0009845,seed germination; GO:0006665,sphingolipid metabolic process
Capana02g002318	1.74179	59.1195	5.04892	2.4737e-07	up	--
Capana07g002009	521.104	1245.01	1.25435	2.57711e-07	up	GO:0004364,glutathione transferase activity; GO:0009734,auxin-activated signaling pathway
Capana06g003057	0	56.1801	8.38488	2.61981e-07	up	GO:0010494,cytoplasmic stress granule; GO:0000932,P-body; GO:0046872,metal ion binding; GO:0009737,response to abscisic acid; GO:0010162,seed dormancy process
Capana05g002190	6.90549	844.982	6.91958	2.67445e-07	up	GO:0000785,chromatin; GO:0005829,cytosol; GO:0005634,nucleus; GO:0003682,chromatin binding; GO:0005085,guanyl-nucleotide exchange factor activity; GO:0042802,identical protein binding; GO:0009881,photoreceptor activity; GO:0042803,protein homodimerization activity; GO:0009649,entrainment of circadian clock; GO:0018298,protein-chromophore linkage; GO:0009411,response to UV; GO:0010224,response to …
Capana06g002070	26.3039	100.08	1.91777	2.76393e-07	up	--
Capana02g002160	5.31242	167.044	4.96854	2.80741e-07	up	GO:0005618,cell wall; GO:0005829,cytosol; GO:0005576,extracellular region; GO:0005774,vacuolar membrane; GO:0045330,aspartyl esterase activity; GO:0030599,pectinesterase activity; GO:0046910,pectinesterase inhibitor activity; GO:0030598,rRNA N-glycosylase activity; GO:0090729,toxin activity; GO:0042545,cell wall modification; GO:0050832,defense response to fungus; GO:0031640,killing of cells of o…
Capana07g002431	6.53785	53.1201	3.01597	2.83877e-07	up	GO:0016021,integral component of membrane; GO:0016020,membrane; GO:0005886,plasma membrane; GO:0015293,symporter activity; GO:0003333,amino acid transmembrane transport; GO:0006865,amino acid transport
Capana07g000527	57.5686	328.833	2.5197	3.04699e-07	up	GO:0005887,integral component of plasma membrane; GO:0005886,plasma membrane; GO:0005516,calmodulin binding; GO:0030552,cAMP binding; GO:0030553,cGMP binding; GO:0005216,ion channel activity; GO:0042391,regulation of membrane potential
Capana02g003534	9.7739	558.866	5.82139	3.26054e-07	up	GO:0009507,chloroplast; GO:0047274,galactinol-sucrose galactosyltransferase activity; GO:0005975,carbohydrate metabolic process; GO:0009737,response to abscisic acid; GO:0006979,response to oxidative stress; GO:0009414,response to water deprivation
Capana03g001749	144.715	766.075	2.40143	3.31784e-07	up	GO:0016021,integral component of membrane; GO:0016020,membrane; GO:0020037,heme binding; GO:0005506,iron ion binding; GO:0016709,oxidoreductase activity, acting on paired donors, with incorporation or reduction of molecular oxygen, NAD(P)H as one donor, and incorporation of one atom of oxygen; GO:0044550,secondary metabolite biosynthetic process
Capana03g001555	7.26504	64.0784	3.16994	3.39748e-07	up	GO:0048046,apoplast; GO:0005618,cell wall; GO:0004553,hydrolase activity, hydrolyzing O-glycosyl compounds; GO:0016762,xyloglucan:xyloglucosyl transferase activity; GO:0042546,cell wall biogenesis; GO:0071555,cell wall organization; GO:0010411,xyloglucan metabolic process
Capana08g000721	0.248892	48.6805	7.21944	3.39838e-07	up	--
Capana02g002120	11.7437	136.79	3.54821	3.41099e-07	up	GO:0016021,integral component of membrane; GO:0005886,plasma membrane; GO:0005524,ATP binding; GO:0005516,calmodulin binding; GO:0030246,carbohydrate binding; GO:0004674,protein serine/threonine kinase activity; GO:0006468,protein phosphorylation; GO:0048544,recognition of pollen
Capana12g002619	45.446	225.485	2.30427	3.45838e-07	up	GO:0048046,apoplast; GO:0008622,epsilon DNA polymerase complex; GO:0051539,4 iron, 4 sulfur cluster binding; GO:0003677,DNA binding; GO:0003887,DNA-directed DNA polymerase activity; GO:0000166,nucleotide binding; GO:0008310,single-stranded DNA 3'-5' exodeoxyribonuclease activity; GO:0008270,zinc ion binding; GO:0006287,base-excision repair, gap-filling; GO:0045004,DNA replication proofreading; GO…
Capana09g001961	173.676	441.597	1.34467	3.73817e-07	up	--
Capana11g000255	20.6386	179.131	3.12731	3.79617e-07	up	GO:0102965,alcohol-forming fatty acyl-CoA reductase activity; GO:0080019,fatty-acyl-CoA reductase (alcohol-forming) activity; GO:0006629,lipid metabolic process
Capana12g002523	1794.88	6483.66	1.853	3.83413e-07	up	GO:0016021,integral component of membrane; GO:0005774,vacuolar membrane; GO:0015171,amino acid transmembrane transporter activity; GO:0003333,amino acid transmembrane transport
Capana03g001744	31.005	186.397	2.57766	3.85524e-07	up	GO:0016021,integral component of membrane; GO:0016020,membrane; GO:0020037,heme binding; GO:0005506,iron ion binding; GO:0016709,oxidoreductase activity, acting on paired donors, with incorporation or reduction of molecular oxygen, NAD(P)H as one donor, and incorporation of one atom of oxygen; GO:0044550,secondary metabolite biosynthetic process
Capana00g001008	137.879	299.123	1.11498	3.90561e-07	up	--
Capana03g000778	1574.79	46490.1	4.88352	3.9183e-07	up	GO:0030246,carbohydrate binding; GO:0008061,chitin binding; GO:0006952,defense response
Capana03g002850	29.1372	112.546	1.94662	4.02531e-07	up	GO:0016021,integral component of membrane; GO:0020037,heme binding; GO:0005506,iron ion binding; GO:0004497,monooxygenase activity; GO:0016705,oxidoreductase activity, acting on paired donors, with incorporation or reduction of molecular oxygen
Capana00g003680	66.7836	227.81	1.76024	4.06979e-07	up	--
Capana05g002125	146.041	343.425	1.23782	4.26057e-07	up	GO:0009507,chloroplast; GO:0005634,nucleus; GO:0004059,aralkylamine N-acetyltransferase activity; GO:0008080,N-acetyltransferase activity; GO:0030187,melatonin biosynthetic process; GO:0016032,viral process
Capana07g000878	106.264	346.808	1.711	4.32529e-07	up	GO:0071944,cell periphery; GO:0005618,cell wall; GO:0016021,integral component of membrane; GO:0045330,aspartyl esterase activity; GO:0030599,pectinesterase activity; GO:0046910,pectinesterase inhibitor activity; GO:0042545,cell wall modification; GO:0045490,pectin catabolic process
Capana00g003208	183.893	417.258	1.17758	4.77463e-07	up	--
Capana08g002100	8.78836	174.547	4.34784	4.84618e-07	up	--
Capana08g002439	300.493	656.336	1.12587	4.84837e-07	up	--
Capana05g001661	691.299	1433.09	1.05215	5.25452e-07	up	--
Capana01g000711	1.11979	42.7073	5.17805	5.69155e-07	up	GO:0005576,extracellular region; GO:0019953,sexual reproduction
Capana04g001014	6.88218	95.5214	3.8325	5.72904e-07	up	GO:0016021,integral component of membrane; GO:0016020,membrane; GO:0005886,plasma membrane; GO:0009506,plasmodesma; GO:0090406,pollen tube; GO:0005524,ATP binding; GO:0004674,protein serine/threonine kinase activity
Capana03g002611	52.826	195.566	1.88453	5.77707e-07	up	GO:0005794,Golgi apparatus; GO:0000139,Golgi membrane; GO:0016021,integral component of membrane; GO:0016413,O-acetyltransferase activity; GO:1990538,xylan O-acetyltransferase activity; GO:0045893,positive regulation of transcription, DNA-templated; GO:0009409,response to cold; GO:0050826,response to freezing; GO:0045492,xylan biosynthetic process
Capana02g001926	0.622001	68.4744	6.81514	5.94193e-07	up	--
Capana04g001044	0	31.8346	7.56701	6.03783e-07	up	--
Capana12g000572	43.4692	182.914	2.07226	6.04654e-07	up	--
Capana06g000231	785.809	1667.39	1.08628	6.19604e-07	up	GO:0009507,chloroplast; GO:0009941,chloroplast envelope; GO:0031969,chloroplast membrane; GO:0009534,chloroplast thylakoid; GO:0009535,chloroplast thylakoid membrane; GO:0016021,integral component of membrane; GO:0016020,membrane; GO:0009538,photosystem I reaction center; GO:0010287,plastoglobule; GO:0009579,thylakoid; GO:0019904,protein domain specific binding; GO:0015979,photosynthesis
Capana04g000660	190.511	460.579	1.27176	6.33508e-07	up	--
Capana07g000166	146.968	322.522	1.13789	6.56905e-07	up	GO:0005737,cytoplasm; GO:0016020,membrane; GO:0043531,ADP binding; GO:0005524,ATP binding; GO:0009626,plant-type hypersensitive response
Capana09g000600	117.115	265.926	1.17897	6.94091e-07	up	--
Capana06g002314	66.515	169.927	1.35455	7.04232e-07	up	GO:0009507,chloroplast; GO:0031969,chloroplast membrane; GO:0016021,integral component of membrane; GO:0007275,multicellular organism development
Capana06g001322	37.4278	119.951	1.6902	7.23155e-07	up	GO:0016021,integral component of membrane; GO:0005743,mitochondrial inner membrane; GO:0005739,mitochondrion; GO:0015181,arginine transmembrane transporter activity; GO:0005290,L-histidine transmembrane transporter activity; GO:0015189,L-lysine transmembrane transporter activity; GO:0000064,L-ornithine transmembrane transporter activity; GO:0006844,acyl carnitine transport; GO:0006972,hyperosmoti…
Capana02g003396	104.819	225.612	1.10237	7.43303e-07	up	--
Capana03g004515	141.29	1776.16	3.65041	7.46792e-07	up	GO:0048046,apoplast; GO:0005618,cell wall; GO:0030145,manganese ion binding; GO:0045735,nutrient reservoir activity
Capana11g000459	18.2567	985.44	5.75769	7.57872e-07	up	GO:0005829,cytosol; GO:0051537,2 iron, 2 sulfur cluster binding; GO:0018488,aryl-aldehyde oxidase activity; GO:0018479,benzaldehyde dehydrogenase (NAD+) activity; GO:0009055,electron transfer activity; GO:0050660,flavin adenine dinucleotide binding; GO:0050302,indole-3-acetaldehyde oxidase activity; GO:0005506,iron ion binding; GO:0016614,oxidoreductase activity, acting on CH-OH group of donors; …
Capana01g000562	95.9663	313.027	1.708	7.8651e-07	up	--
Capana02g003246	15.7657	87.8941	2.48615	7.96347e-07	up	--
Capana01g003456	0.622001	500.902	9.66828	7.99765e-07	up	GO:0009507,chloroplast; GO:0102395,9-cis-beta-carotene 9',10'-cleavage oxygenase activity; GO:0046872,metal ion binding; GO:0016702,oxidoreductase activity, acting on single donors with incorporation of molecular oxygen, incorporation of two atoms of oxygen; GO:0016121,carotene catabolic process; GO:0010223,secondary shoot formation; GO:1901601,strigolactone biosynthetic process
Capana05g001042	0	31.1614	7.53649	8.00014e-07	up	GO:0009507,chloroplast; GO:0009941,chloroplast envelope; GO:0042644,chloroplast nucleoid; GO:0009534,chloroplast thylakoid; GO:0009535,chloroplast thylakoid membrane; GO:0016020,membrane; GO:0009295,nucleoid; GO:0009508,plastid chromosome; GO:0098572,stromal side of plastid thylakoid membrane; GO:0007623,circadian rhythm
Capana08g001342	292.54	678.846	1.21815	8.01631e-07	up	--
Capana00g002647	33.4559	214.984	2.67683	8.14718e-07	up	--
Capana06g000155	3391.33	7186.93	1.08373	8.28955e-07	up	GO:0009535,chloroplast thylakoid membrane; GO:0009538,photosystem I reaction center; GO:0015979,photosynthesis
Capana04g002555	280.373	799.569	1.51247	8.35764e-07	up	GO:0043531,ADP binding; GO:0005524,ATP binding; GO:0006952,defense response
Capana05g002402	126.852	287.44	1.18525	8.41823e-07	up	--
Capana06g000361	1517.05	3330.69	1.13424	8.44617e-07	up	--
Capana10g001080	302.242	668.903	1.14276	8.60039e-07	up	GO:0009507,chloroplast; GO:0009535,chloroplast thylakoid membrane; GO:0019898,extrinsic component of membrane; GO:0009654,photosystem II oxygen evolving complex; GO:0009579,thylakoid; GO:0005509,calcium ion binding; GO:0015979,photosynthesis
Capana06g001067	179.524	367.641	1.03835	9.2524e-07	up	GO:0043231,intracellular membrane-bounded organelle; GO:0004519,endonuclease activity; GO:0003723,RNA binding; GO:0008270,zinc ion binding; GO:0009451,RNA modification
Capana02g003240	7.23717	107.58	3.91286	9.36293e-07	up	--
Capana05g000983	133.175	345.963	1.37344	9.4838e-07	up	GO:0000139,Golgi membrane; GO:0016021,integral component of membrane; GO:0005886,plasma membrane; GO:0005802,trans-Golgi network; GO:0005524,ATP binding; GO:0000287,magnesium ion binding; GO:0004012,phospholipid-translocating ATPase activity; GO:0048194,Golgi vesicle budding
Capana05g001951	359.274	932.087	1.37258	9.71552e-07	up	GO:0005634,nucleus; GO:0003677,DNA binding; GO:0003700,DNA binding transcription factor activity; GO:0009873,ethylene-activated signaling pathway; GO:0006351,transcription, DNA-templated
Capana11g001541	0	985.376	12.5189	9.78644e-07	up	GO:0050636,vinorine synthase activity; GO:0009820,alkaloid metabolic process
Capana02g002676	17.5168	75.147	2.10516	9.90421e-07	up	GO:0016567,protein ubiquitination
Capana02g001818	48.1918	155.492	1.68168	1.03233e-06	up	GO:0016021,integral component of membrane; GO:0020037,heme binding; GO:0005506,iron ion binding; GO:0016705,oxidoreductase activity, acting on paired donors, with incorporation or reduction of molecular oxygen; GO:0008395,steroid hydroxylase activity; GO:0010268,brassinosteroid homeostasis; GO:0016131,brassinosteroid metabolic process; GO:0040008,regulation of growth; GO:0009741,response to brass…
Capana03g004318	23.6806	99.4749	2.07926	1.07736e-06	up	GO:0048046,apoplast; GO:0009505,plant-type cell wall; GO:0005774,vacuolar membrane; GO:0005773,vacuole; GO:0004565,beta-galactosidase activity; GO:0030246,carbohydrate binding; GO:0005975,carbohydrate metabolic process
Capana06g000973	924.728	3302.15	1.83662	1.09177e-06	up	GO:0005618,cell wall; GO:0009507,chloroplast; GO:0005829,cytosol; GO:0009516,leucoplast; GO:0008802,betaine-aldehyde dehydrogenase activity; GO:0019285,glycine betaine biosynthetic process from choline; GO:0009651,response to salt stress; GO:0009414,response to water deprivation
Capana01g003283	85.8537	206.721	1.26435	1.13493e-06	up	GO:0016021,integral component of membrane; GO:0000741,karyogamy; GO:0010197,polar nucleus fusion; GO:0009651,response to salt stress
Capana04g002144	18.2047	103.505	2.49574	1.1985e-06	up	GO:0005634,nucleus; GO:0003700,DNA binding transcription factor activity; GO:0046872,metal ion binding; GO:0043565,sequence-specific DNA binding; GO:0009908,flower development; GO:0006355,regulation of transcription, DNA-templated; GO:0006351,transcription, DNA-templated
Capana06g000105	140.245	304.721	1.11357	1.21599e-06	up	GO:0016021,integral component of membrane; GO:0046872,metal ion binding; GO:0004722,protein serine/threonine phosphatase activity
Capana03g004040	292.265	968.848	1.73126	1.34336e-06	up	GO:0005829,cytosol; GO:0005654,nucleoplasm; GO:0005634,nucleus; GO:0032440,2-alkenal reductase [NAD(P)] activity; GO:0046686,response to cadmium ion; GO:0006979,response to oxidative stress
Capana04g002016	2.34521	36.4019	3.93392	1.42171e-06	up	GO:0005737,cytoplasm; GO:0005634,nucleus; GO:0009846,pollen germination
Capana00g000405	108.274	363.951	1.75527	1.43755e-06	up	--
Capana00g003418	82.9359	238.41	1.52273	1.43794e-06	up	--
Capana00g000353	101.115	223.967	1.14603	1.52156e-06	up	--
Capana01g002819	197.762	960.888	2.28013	1.52447e-06	up	GO:0005768,endosome; GO:0005794,Golgi apparatus; GO:0005525,GTP binding; GO:0016004,phospholipase activator activity; GO:0015031,protein transport; GO:0007264,small GTPase mediated signal transduction; GO:0016192,vesicle-mediated transport
Capana05g000571	163.501	412.922	1.33951	1.54171e-06	up	GO:0009507,chloroplast; GO:0009543,chloroplast thylakoid lumen; GO:0019898,extrinsic component of membrane; GO:0009654,photosystem II oxygen evolving complex; GO:0009579,thylakoid; GO:0005509,calcium ion binding; GO:0015979,photosynthesis
Capana05g002114	190.456	386.064	1.01844	1.62355e-06	up	--
Capana08g001400	263.012	553.45	1.07121	1.67276e-06	up	GO:0016021,integral component of membrane; GO:0005355,glucose transmembrane transporter activity; GO:0005351,carbohydrate:proton symporter activity; GO:0046323,glucose import; GO:0035428,NA
Capana09g000097	3.67628	76.0422	4.38473	1.67426e-06	up	GO:0005789,endoplasmic reticulum membrane; GO:0016021,integral component of membrane; GO:0016020,membrane; GO:0005886,plasma membrane; GO:0005506,iron ion binding; GO:0016491,oxidoreductase activity; GO:0043447,alkane biosynthetic process; GO:0042335,cuticle development; GO:0006723,cuticle hydrocarbon biosynthetic process; GO:0008610,lipid biosynthetic process; GO:0006629,lipid metabolic process;…
Capana04g000021	4.60427	154.632	5.00864	1.73716e-06	up	--
Capana02g003603	82.227	211.51	1.36579	1.74887e-06	up	GO:0003729,mRNA binding; GO:0003743,translation initiation factor activity; GO:0006417,regulation of translation; GO:0009737,response to abscisic acid; GO:0009615,response to virus
Capana12g002835	281.494	651.743	1.21277	1.75593e-06	up	--
Capana08g002097	2.68071	95.4794	5.21764	1.79452e-06	up	--
Capana12g002137	403.465	994.833	1.30008	1.84405e-06	up	--
Capana07g000461	210.756	476.948	1.17996	1.84812e-06	up	--
Capana03g004167	0	29.287	7.44576	1.89698e-06	up	GO:0016021,integral component of membrane; GO:0016020,membrane; GO:0020037,heme binding; GO:0005506,iron ion binding; GO:0016709,oxidoreductase activity, acting on paired donors, with incorporation or reduction of molecular oxygen, NAD(P)H as one donor, and incorporation of one atom of oxygen; GO:0044550,secondary metabolite biosynthetic process
Capana02g001400	65.4143	163.349	1.32006	1.91725e-06	up	GO:0043231,intracellular membrane-bounded organelle; GO:0004519,endonuclease activity; GO:0003723,RNA binding; GO:0009451,RNA modification
Capana07g002212	12.4156	82.7218	2.75383	2.04477e-06	up	GO:0005737,cytoplasm; GO:0016020,membrane; GO:0043531,ADP binding; GO:0005524,ATP binding; GO:0009626,plant-type hypersensitive response
Capana01g000046	5.16963	492.164	6.56541	2.05428e-06	up	GO:0005634,nucleus; GO:0003700,DNA binding transcription factor activity; GO:0043565,sequence-specific DNA binding; GO:0045893,positive regulation of transcription, DNA-templated; GO:0009737,response to abscisic acid; GO:0009414,response to water deprivation; GO:0006351,transcription, DNA-templated
Capana09g001849	360.144	1029.48	1.5129	2.07194e-06	up	GO:0005737,cytoplasm; GO:0005871,kinesin complex; GO:0005874,microtubule; GO:0005886,plasma membrane; GO:0005819,spindle; GO:0005524,ATP binding; GO:0008574,ATP-dependent microtubule motor activity, plus-end-directed; GO:0008017,microtubule binding; GO:0007018,microtubule-based movement
Capana11g001402	2.34521	35.3283	3.89058	2.18318e-06	up	--
Capana10g000907	1.72321	47.0018	4.73632	2.48545e-06	up	--
Capana08g000947	135.823	279.287	1.03582	2.50218e-06	up	GO:0016021,integral component of membrane; GO:0005886,plasma membrane; GO:0005524,ATP binding; GO:0005516,calmodulin binding; GO:0030246,carbohydrate binding; GO:0004674,protein serine/threonine kinase activity; GO:0006468,protein phosphorylation; GO:0048544,recognition of pollen
Capana00g003978	63.8573	173.157	1.43643	2.50562e-06	up	--
Capana05g000330	92.3937	333.361	1.85819	2.513e-06	up	GO:0005634,nucleus; GO:0003700,DNA binding transcription factor activity; GO:0043565,sequence-specific DNA binding; GO:0006351,transcription, DNA-templated
Capana03g000924	109.848	370.804	1.7595	2.52199e-06	up	GO:0043231,intracellular membrane-bounded organelle; GO:0004519,endonuclease activity; GO:0003723,RNA binding; GO:0008270,zinc ion binding; GO:0009451,RNA modification
Capana08g000903	433.503	1236.68	1.51222	2.59501e-06	up	--
Capana12g000581	150.161	443.991	1.56887	2.60588e-06	up	GO:0005615,extracellular space; GO:0005507,copper ion binding; GO:0016491,oxidoreductase activity
Capana03g002288	188.997	417.932	1.15008	2.72668e-06	up	GO:0005789,endoplasmic reticulum membrane; GO:0016021,integral component of membrane; GO:0031090,organelle membrane; GO:0020037,heme binding; GO:0005506,iron ion binding; GO:0050593,N-methylcoclaurine 3'-monooxygenase activity
Capana03g004130	216.251	6603.71	4.93193	2.79941e-06	up	--
Capana08g000191	85.5421	229.097	1.41717	2.83301e-06	up	GO:0009507,chloroplast; GO:0009941,chloroplast envelope; GO:0016021,integral component of membrane; GO:0016020,membrane; GO:0005886,plasma membrane; GO:0009506,plasmodesma; GO:0005774,vacuolar membrane; GO:0005773,vacuole; GO:0006811,ion transport
Capana06g000227	61.184	161.908	1.40827	2.91086e-06	up	GO:0005509,calcium ion binding
Capana01g002736	5.98725	66.864	3.48148	3.09599e-06	up	GO:0005576,extracellular region; GO:0003993,acid phosphatase activity; GO:0046872,metal ion binding
[truncated: 3,244 more rows]

## Sheet: 22DAP
Supplementary Table S6. The differentially expressed genes (DEGs) identified between the BB3 and Chiltepin
Gene ID	BB3-22DAP	Chiltepin-22DAP	log2FoldChange	pvalue	regulated	GO
Capana00g001096	266.286	6237.92	4.5493	0	up	--
[truncated: 3,447 more rows]

## Sheet: 33DAP
Supplementary Table S6. The differentially expressed genes (DEGs) identified between the BB3 and Chiltepin
[truncated: 2,390 more rows]

## Sheet: 55DAP
Supplementary Table S6. The differentially expressed genes (DEGs) identified between the BB3 and Chiltepin
[truncated: 3,758 more rows]
