# Supplementary material for: Integrative Analysis of the Metabolome and Transcriptome of a Cultivated Pepper and Its Wild Progenitor Chiltepin (Capsicum annuum L. var. glabriusculum) Revealed the Loss of Pungency During Capsicum Domestication
Source: Front Plant Sci. 2022 Jan 5;12:783496. doi: 10.3389/fpls.2021.783496 (PMC8767146; doi:10.3389/fpls.2021.783496)
Supplement: Supplementary file 6 [file Table_6.XLSX]

## Sheet: structural genes
Supplementary Table S6. The structural genes in the capsaicinoid biosynthesis
Gene ID	Gene	BB3				Chiltepin
		11DAP	22DAP	33DAP	55DAP	11DAP	22DAP	33DAP	55DAP
Capana01g003112	ACLd-D1	371.902	286.374	347.179	415.012	953.796	739.893	2213.53	237.52
Capana06g001870	ACLd-D2	70.4286	96.8828	128.803	114.772	242.771	278.017	404.908	150.649
Capana01g000111	KasI-D1	0.0865727	0.0235447	0.318259	0.059191	7.89666	36.0502	1.22746	0.0836723
Capana01g000112	KasI-P3	0.0234477	0.057192	0.181799	0.0766243	1.52163	1.07547	0.844502	0.247548
Capana02g001556	KasI-D5	98.5236	91.1712	103.785	55.9056	126.03	128.81	231.717	50.0913
Capana09g000140	KasI-D8	8.18727	2.73995	10.0872	21.3215	2.08857	2.35257	2.15848	7.15334
Capana01g000113	KasI-D87	4.53135	2.41237	0.969265	1.84749	1.33661	3.55817	0.557951	0.142601
Capana01g004020	KasIIIb-D1	1.51063	0.83218	0.615842	0.565951	2.03093	6.73865	0.796893	0
Capana04g000751	BCAT-D1	0.280516	0.168825	2.08672	9.42991	10.2018	18.9234	2.20251	15.923
Capana12g000820	BCAT-D3	37.3625	14.4396	4.01593	1.1029	0.0991145	0.263593	0.138839	2.4913
Capana02g002928	BCAT-D4	98.8199	97.5405	63.0356	182.988	86.695	69.2006	61.8533	63.2737
Capana09g002200	PAL-D2	7.80707	3.53649	2.73081	3.06312	18.6726	22.8137	7.24006	16.6865
Capana09g002199	PAL-D3	54.9149	3.33744	20.7913	7.51185	46.571	43.5755	20.524	52.7318
Capana05g002560	PAL-D5	8.76121	16.4643	16.8394	0.193609	22.6889	9.88592	19.96	1.89936
Capana02g003074	CCoAOMT-D4	0.107405	0.0446677	1.60827	20.2996	0.193528	2.0287	0.215823	2.68134
Capana04g002396	CCoAOMT-D7	0	0	0.325621	0	0.085381	0.109274	0.559665	3.08584
Capana04g002388	CCoAOMT-D8	48.3012	26.8715	27.7054	12.7757	7.51937	9.64848	8.96697	6.56286
Capana00g003511	CCoAOMT-P5	12.2503	11.7821	20.4585	10.0695	5.53074	9.58791	5.61182	5.53089
Capana09g000427	pAMT-D2	4.87439	33.35	8.67964	26.224	33.3046	20.1129	19.59	8.87305
Capana02g002340	AT3-D1	0	0	0.328823	0	15.1686	35.2292	0.786621	0
Capana02g002339	AT3-D2	0	0	0.0932033	0	5.33771	14.5281	1.57647	0.0195727
Capana02g002341	AT3-D3	0	0	0	0	0.279116	0.998498	0	0
Capana06g000197	FatA-D1	44.2012	24.8853	26.6801	22.3255	49.4656	58.7606	91.0326	94.1458
Capana08g002463	HCHL	7.1148	4.99557	3.81181	0.347113	5.65299	10.0009	5.2909	1.28467
Note：FPKM in the RNA-seq

## Sheet: metabolites
Supplementary Table S6.The metabolites in the capsaicinoid biosynthesis
Compounds	11DAP	22DAP	33DAP	55DAP
L-Phenylalanine	1.0176	NAN	NAN	NAN
Vanillin	NAN	NAN	1.07749	NAN
Capsalcin	18.9412	5.02958	5.1477	9.36735
Dihydrocapsaicin	12.5198	6.23188	5.16682	9.48513
Coniferyl alcohol	NAN	-3.16762	-1.51847	NAN
L-Glutamine	NAN	-1.06191	NAN	-2.64138
L-Valine	NAN	NAN	-1.08286	NAN
p-Coumaric acid	-3.09245	NAN	NAN	NAN
Coniferylaldehyde	NAN	NAN	NAN	1.33798
Note：Fold_Change in BB3 Vs chiltenpin
