# Supplementary material for: Integrative Analysis of the Metabolome and Transcriptome of a Cultivated Pepper and Its Wild Progenitor Chiltepin (Capsicum annuum L. var. glabriusculum) Revealed the Loss of Pungency During Capsicum Domestication
Source: Front Plant Sci. 2022 Jan 5;12:783496. doi: 10.3389/fpls.2021.783496 (PMC8767146; doi:10.3389/fpls.2021.783496)
Supplement: Supplementary file 7 [file Table_7.XLSX]

## Sheet: gene
Supplementary Table S7. The 7946 non-redundant DEGs used for weighted gene co-expression network analysis (WGCNA) analysis
ID	BB3-11DAP	BB3-22DAP	BB3-33DAP	BB3-55DAP	Chiltepin-11DAP	Chiltepin-22DAP	Chiltepin-33DAP	Chiltepin-55DAP
Capana00g000010	2.84546	0.0981513	0.102865	0.0795417	0	0	0.084671	0.08485
Capana00g000035	5.31301	26.6174	98.1801	260.433	613.864	12.4165	117.493	131.095
Capana00g000038	2.29923	0.465665	0.346133	0	0.524045	0.421924	0.068232	0.133197
Capana00g000071	9.32917	8.81741	9.8029	7.1284	3.87236	4.4521	4.15316	5.63748
Capana00g000075	39.132	24.6995	15.5941	12.2126	14.1892	16.8535	6.49996	11.2801
Capana00g000088	8.57042	9.27846	8.08546	3.43752	13.7136	9.75432	10.1346	13.2649
Capana00g000110	2.00279	0.619383	0.30367	0	2.37027	1.83483	1.1607	0.565474
Capana00g000118	0.884063	0	7.32386	48.8065	0	0.183937	0	0
Capana00g000136	4.15799	0.489917	1.46569	0.988816	0.820932	3.15916	1.19212	2.51745
Capana00g000151	2.00813	1.97307	13.2078	103.331	3.92989	0.701458	2.45167	67.1611
Capana00g000156	2.22504	0.835475	0.469308	0.100287	0.730485	0.646373	0.606986	0.0925987
Capana00g000163	0.398545	0.943135	1.36477	3.17386	0	0.0907533	0.458338	0
Capana00g000179	0.258315	0.177364	0.212563	0.149162	0.675511	1.16118	0.812013	1.05526
Capana00g000183	2.29875	1.10001	0.940267	0.0230043	1.58035	1.57029	0.548719	0.0714593
Capana00g000196	0.193483	0.115774	0.482663	57.6458	83.5937	28.7754	17.1932	1143.39
Capana00g000197	0.437042	0.374113	0.427338	0.467018	10.1539	10.6196	7.94133	12.0223
Capana00g000198	0.669742	0.914485	0.136918	0	0.173032	0	0.241227	0
Capana00g000219	137.434	343.892	31.8392	0	0.328491	0.0194347	3.04169	0
Capana00g000222	9.18976	2.85269	2.57173	6.31392	0	0.177682	0.034155	0.800334
Capana00g000229	0.700806	1.51039	0.749844	15.6521	2.1471	15.8513	1.66343	8.75322
Capana00g000236	0.015523	0.0329467	0.178615	0.103253	0.319866	0.644236	0.772058	2.08484
Capana00g000246	1.5803	0.117043	0.201244	0	4.25241	1.33679	0.519588	0.0632513
Capana00g000255	3.00344	1.45013	2.70492	7.03567	4.72304	5.57056	2.3888	8.88972
Capana00g000258	2.17171	5.28617	6.48552	3.90127	0.933693	1.14211	0.740035	0.335293
Capana00g000268	0.158275	0.0321487	0.0388827	0.00894933	0.238868	0.429551	0.365569	0.0324627
Capana00g000284	15.9785	13.3399	13.432	28.4542	9.92583	7.44931	6.75575	10.3939
Capana00g000290	1.2447	1.03035	0.84039	0.887258	0.412878	0.948173	0.29088	0.085506
Capana00g000293	0.690521	0.0250437	1.68285	0.0373127	0	0.0299143	0.729199	0.120961
Capana00g000298	18.9497	21.7266	24.6544	7.15949	38.5709	35.9769	28.9127	59.6231
Capana00g000301	3.05168	0.322836	0.912162	0.227404	0.277765	0.522979	0.104963	0.123189
Capana00g000304	0	0	0.0179413	0	0.0293295	0.060271	0.183874	0.242817
Capana00g000305	22.8392	25.1266	22.2402	16.2808	0.014239	0.172788	0.630482	1.13885
Capana00g000315	2149.35	2654.01	104.109	0.909362	679.869	718.902	61.0042	1.66017
Capana00g000316	0.354851	0.877351	0.872236	0.960245	16.9145	16.5833	6.03249	8.74535
Capana00g000320	19.3646	24.7233	32.3244	27.9539	17.3106	25.5561	22.1429	13.589
Capana00g000323	2.78232	2.3974	2.34812	1.48387	2.26521	2.51087	3.28496	3.50858
Capana00g000346	0.195802	0.0709673	0.237727	0.12666	0.513165	0.334596	0.163713	5.05511
Capana00g000347	2.26181	2.82631	4.88028	5.00293	7.24133	6.25028	5.52137	10.665
Capana00g000353	4.64722	5.51716	5.94785	7.72933	7.93129	8.82212	7.71998	10.7399
Capana00g000362	2.02186	1.8397	4.2763	2.78559	2.8255	5.52028	3.62698	4.42874
Capana00g000373	0	0.148517	0.144204	0	2.21313	3.94337	2.15416	4.08906
Capana00g000395	12.6698	0.0497617	2.46775	0	0.252304	0.892015	1.4627	0.033502
Capana00g000396	39.9628	49.5363	37.3441	31.9409	92.9034	89.1331	55.2332	29.9816
Capana00g000400	1.5047	0.0781813	1.05405	5.02853	0.493107	1.84289	1.24636	8.41813
Capana00g000405	1.60516	2.72647	2.43796	0.670663	4.23674	3.97367	2.59385	2.54358
Capana00g000424	0.135919	5.45084	30.8	168.903	2.3647	9.44545	12.2855	44.792
Capana00g000428	248.118	76.9822	18.7539	6.41356	0.72095	0.485476	0.937356	0.133219
Capana00g000441	129.293	0.451066	38.2465	0.0694433	0.620975	0.279516	10.0778	0.0536703
Capana00g000445	2.9076	1.90495	1.98978	0	1.88409	0.568313	1.22962	0.936761
Capana00g000446	4.16031	5.35916	14.9081	0.644088	4.43203	2.34297	61.5293	4.5291
Capana00g000453	9.90312	3.76864	3.21217	0.0750197	16.9015	4.11296	2.01293	1.79763
Capana00g000455	9.91324	8.1829	9.01723	17.4486	7.68267	14.5898	7.66588	15.6348
Capana00g000458	0.0156333	0.041811	0.221691	6.42689	0.282083	1.34768	0.513337	0.986771
Capana00g000469	1.06055	0.490793	0.405303	3.41892	0.390059	2.05062	3.79792	9.98993
Capana00g000476	0.141941	0.0560447	0.0801793	1.08255	0.10894	0.106574	0.150013	0.238975
Capana00g000489	0.170263	0.096127	0.201072	0.216514	0.50461	0.528339	0.552302	0.422554
Capana00g000490	5.23689	5.12819	5.32349	4.84938	6.40854	8.72579	9.06962	9.79011
Capana00g000498	12.4762	0.787951	28.27	10.1374	1.82899	1.90128	10.2474	4.68191
Capana00g000499	0	0.30814	0.621039	0.212282	0	0	0.091859	0
Capana00g000500	8.71679	9.24968	12.784	4.81598	20.0123	18.5308	17.0427	9.11912
Capana00g000507	0.226492	0.0691897	1.725	0.0865357	0.740242	1.78039	1.2443	0.491765
Capana00g000508	0.068278	0.022111	0.660134	0.186574	0.18754	0.474359	0.335021	0.234178
Capana00g000510	22.8057	13.9515	11.9755	16.6097	7.78305	10.9839	9.83009	14.9804
Capana00g000512	0.035625	0	0	0	50.6902	63.7881	50.4885	66.786
Capana00g000533	0.81899	1.80754	0.405894	0.402041	0.52485	2.44561	1.14375	7.93056
Capana00g000539	18.3415	20.785	21.1136	16.7178	4.17822	4.45441	5.82859	5.76111
Capana00g000555	8.5206	11.1721	5.97214	3.00217	6.54379	6.77936	10.9048	5.72756
Capana00g000558	0.0414337	0.132012	0.063022	0.021901	10.853	13.1063	11.0863	11.02
Capana00g000566	11.0852	25.8293	18.413	18.5952	0.229235	0.607274	0.241689	1.21463
Capana00g000571	18.833	25.4143	11.6757	17.7508	28.928	22.5038	33.3935	21.9658
Capana00g000573	0.0976937	0.0956143	0.255556	2.37644	0.922193	2.53049	0.85695	6.51606
Capana00g000580	0.016727	0.260931	0.106878	0.0666177	0.944707	1.17136	0.978907	2.63123
Capana00g000586	7.18842	3.17719	5.08157	0.159927	1.32839	3.1442	2.97201	0.324559
Capana00g000596	11.2815	14.1501	7.39693	3.91544	6.87142	6.92965	15.8983	7.13363
Capana00g000602	2.34874	1.71014	3.01589	4.23274	0	0	0.0347	0.0382443
Capana00g000620	0.271751	0.0427737	0.274694	0.121693	0.211558	0.256338	1.53634	0.319915
Capana00g000625	6.73924	3.71712	6.70793	1.24181	4.03937	2.0867	2.72448	0.309731
Capana00g000626	3.12648	3.46921	2.83409	1.87409	5.94436	6.47425	3.95031	2.19515
Capana00g000627	52.6473	279.538	182.275	623.227	380.563	474.525	323.52	524.853
Capana00g000648	0.016236	0.0510053	0.298592	0.519939	0.553786	1.70943	0.842005	5.87999
Capana00g000653	3.71915	2.4229	3.40522	8.52505	5.43692	7.22347	4.78721	11.1537
Capana00g000656	0	0	8.20007	0	0.143088	0.027611	29.2378	1.78074
Capana00g000664	1.59866	1.08994	1.62739	2.24104	2.05445	2.13593	3.66016	4.39612
Capana00g000665	6.93784	4.00801	3.09933	1.25274	3.79741	8.827	3.06577	2.14429
Capana00g000668	0.21192	0.13488	2.60656	0.486413	1.83365	2.17625	4.75623	2.48327
Capana00g000679	8.02411	1.94044	2.35655	0	0.0181975	0.0183373	0.0522855	0
Capana00g000681	15.0856	6.75502	4.10338	0.35019	1.72847	5.85721	0.456442	0.264874
Capana00g000688	5.79863	3.98614	0.612043	6.66569	8.20225	126.801	4.2787	39.3718
Capana00g000702	1.98137	0.953254	0.888342	0.430843	0	0	0	0
Capana00g000716	3.00687	2.23734	1.86024	0.793463	0.247468	0.653637	0.412824	0.300524
Capana00g000724	28.0372	15.4043	14.1041	7.19789	6.07014	8.93679	10.1322	8.62907
Capana00g000726	3.19821	0.665598	2.77477	0.0229627	3.2784	2.31878	0.79644	0.14598
Capana00g000734	2.57844	2.07478	1.42539	1.65914	1.94577	0.24442	0.0562885	2.8137
Capana00g000736	2.65179	3.99666	1.97011	4.73224	8.9407	8.902	2.83411	2.71415
Capana00g000744	11.485	13.8776	19.3919	15.2972	58.5717	52.155	47.9992	50.656
Capana00g000790	14.0075	17.3598	20.1464	44.2549	10.2708	18.2294	14.4177	15.0258
Capana00g000791	29.6356	46.3143	56.8341	93.0352	34.1432	50.6235	38.8265	36.5796
Capana00g000842	10.7565	5.67288	4.94609	0.188347	6.32316	3.00106	5.08409	3.23724
Capana00g000845	11.4702	18.9582	21.4732	10.8814	23.1554	22.5542	41.2196	21.4064
Capana00g000857	71.0248	49.4554	9.72254	0	0	1.63082	0.450074	0
Capana00g000869	2.39191	2.71288	3.0004	2.4105	3.86567	5.74614	5.10424	3.79994
Capana00g000873	7.47616	7.1294	39.6114	15.9472	1.69332	4.896	3.95193	6.92609
Capana00g000874	7.92601	1.82988	5.42976	104.569	1.76681	5.5605	4.58683	56.0005
Capana00g000880	28.3563	31.321	37.6793	38.2538	21.5925	32.4941	17.4908	13.2699
Capana00g000894	1.44861	8.35532	8.51847	8.4367	9.66628	12.2467	8.98386	13.3175
Capana00g000901	4.35506	7.93119	6.13143	0.477009	0.497851	0.878609	1.17831	0.183131
Capana00g000909	0	0	0	0.487008	0.283418	0.673122	0.139202	0.405046
Capana00g000918	22.0103	32.132	31.8132	0	8.13999	6.9389	3.41049	1.55509
Capana00g000923	9.64978	0.0332977	1.85999	0.017038	0.201583	0.131975	0.0655875	0.0182357
Capana00g000926	6.27982	18.6254	8.67178	19.9517	37.2327	7.99362	18.5166	7.17207
Capana00g000934	1.39022	0.909359	3.09436	1.58255	2.59068	2.80136	5.0141	8.31409
Capana00g000937	77.9392	134.286	119.018	99.126	146.295	153.099	97.5534	97.0666
Capana00g000938	8.70587	9.31861	10.4074	3.7199	22.1464	18.0203	15.962	5.25541
Capana00g000942	3.27136	2.04479	4.88263	2.53346	5.70439	10.3276	6.68999	5.20971
Capana00g000951	42.9755	37.6735	37.7949	47.7648	17.081	14.3707	27.4561	27.4616
Capana00g000953	1.79391	2.16472	2.07654	1.48941	5.3026	7.20882	4.28428	7.19793
Capana00g000961	33.6148	27.5104	30.5174	30.0607	14.4591	14.9643	15.9842	13.6513
Capana00g000979	32.5211	15.2891	9.832	3.22092	4.87189	5.22721	4.9021	2.39021
Capana00g000984	13.9928	17.5782	6.82828	7.92817	22.5629	7.8533	32.0725	8.58151
Capana00g000985	59.2472	249.016	156.118	41.6155	141.385	119.151	125.34	22.086
Capana00g000995	1.77049	1.28719	1.38634	1.30562	0.701666	1.49717	1.90639	1.7601
Capana00g001008	3.77148	6.33114	3.43972	4.66183	6.36373	5.50509	5.9188	5.12421
Capana00g001017	0.176491	0.298393	1.57915	0.631734	0	0.0241583	0	0
Capana00g001022	4.8687	6.1906	6.46382	5.44497	0.0077415	0.00183667	0.100169	0.119934
Capana00g001023	0.317282	0.251752	1.08293	4.56231	3.44957	3.78646	2.48136	9.96312
Capana00g001027	2.02538	15.9425	33.3558	6.19672	37.1677	29.6073	18.8131	22.1042
Capana00g001028	10.816	9.47428	6.55393	1.65921	7.50149	8.60858	8.67413	5.06421
Capana00g001030	32.857	44.9821	81.2818	402.453	29.342	42.6327	38.7258	170.309
Capana00g001034	3.96495	3.02215	3.03408	3.18458	2.84443	3.42652	4.08689	2.671
Capana00g001041	4.49184	3.83516	4.92585	2.82997	4.81609	6.33313	6.72843	6.54954
Capana00g001042	0.0605193	0.0863297	0.265728	0	4.04293	6.7631	4.13197	5.58359
Capana00g001044	0.139975	0.0962477	0.229096	0.202663	4.02564	6.12263	4.84157	8.50495
Capana00g001054	3.24619	2.3613	0.806565	0	0	0.010409	0	0
Capana00g001061	16.4633	11.0582	25.6767	13.2629	0.029892	0.276301	0.126408	0.205522
Capana00g001069	4.78917	6.0049	4.2647	4.56805	7.39546	6.08782	11.6742	6.7635
Capana00g001071	43.4146	51.8959	44.9902	44.9618	17.4679	17.2122	31.6296	26.4618
Capana00g001079	2.25344	0.548983	0.639493	0.287523	2.86399	1.46866	2.86931	0.924467
Capana00g001087	5.66243	8.51289	7.19934	9.09977	5.47796	9.5707	6.90527	4.96011
Capana00g001094	12.4032	8.56304	7.52242	7.16632	2.47513	3.25968	4.49058	2.73276
Capana00g001096	13.4225	6.34515	9.77514	4.42197	181.556	166.946	185.684	92.1008
Capana00g001150	70.902	39.7305	25.7862	18.2041	27.1254	25.6096	12.1166	20.8913
Capana00g001151	0.795169	0.554267	1.67691	1.29658	0.455695	0.408145	0.407867	0.254564
Capana00g001159	0.284524	0.383381	0.741004	0.222693	0	0	0	0
Capana00g001163	0.0170837	0.135668	10.4338	0.0352857	1.3779	0.483189	26.6035	1.67722
Capana00g001167	7.98413	8.00896	10.817	8.27695	7.27602	10.7287	8.03267	17.7152
Capana00g001172	6.97385	0.162608	0.594432	1.58088	0.323147	0.575728	1.04536	2.10563
Capana00g001173	12.972	16.7295	11.8222	11.7639	3.4784	4.38471	5.43465	5.11385
Capana00g001178	20.6837	26.2475	37.8957	21.5874	32.9425	43.2325	34.6055	20.2863
Capana00g001202	1.73906	0.439272	9.17971	12.9482	3.56496	2.73304	16.1573	7.00377
Capana00g001203	2.50513	0.157119	3.5407	0	0.862241	0.407165	3.57863	0.607546
Capana00g001206	0.341295	0.68749	3.22611	6.99099	0.0460985	0.796648	0.714388	0.713424
Capana00g001225	2.28661	1.31174	1.13875	1.15554	0	0	0	0
Capana00g001226	4.20703	4.66773	2.98014	2.6397	0	0	0	0
Capana00g001228	0.425852	0.109821	0.45674	0.396439	2.31133	1.12677	0.443809	0.314803
Capana00g001230	42.8174	29.7414	23.1098	35.3221	13.7612	14.3302	20.2423	13.2101
Capana00g001238	0.031724	0.105303	3.51521	10.5964	0	0	0.054552	0.211891
Capana00g001256	9.99612	10.8761	8.12602	14.7203	17.362	9.2287	11.9329	21.7032
Capana00g001257	1.72741	0.486019	0.341273	0	4.75455	4.57808	1.34597	0.263536
Capana00g001263	107.277	105.909	123.9	183.979	261.097	129.547	165.428	87.9484
Capana00g001271	91.6373	113.104	62.3541	12.4314	35.9762	68.1047	29.0463	3.83519
Capana00g001272	8.01752	5.02475	6.06689	1.76666	4.19537	8.26863	4.24003	4.26913
Capana00g001277	1.32402	0.0430823	0.378456	0.45097	0.316817	0.208613	0.981201	2.32875
Capana00g001305	0.769807	0.749014	0.868415	2.5553	0.839167	2.60394	2.09049	1.92307
Capana00g001320	0.462102	0.916885	1.07622	0.680982	8.06196	6.7585	9.34469	5.34196
Capana00g001331	1.64932	0.783461	1.79217	1.62462	3.79638	5.1703	2.63122	0.648748
Capana00g001338	14.1484	10.6787	9.82516	4.09759	9.56428	8.49385	12.0166	9.21938
Capana00g001353	9.3055	23.2847	25.9885	35.7232	21.1323	37.5351	18.2608	48.2603
Capana00g001365	23.2157	20.9063	39.69	45.8813	119.438	40.265	24.5514	54.6625
Capana00g001370	0.676221	0.280371	6.7526	0	1.88701	1.27177	234.956	199.344
Capana00g001372	0.236079	7.90241	3696.17	0.409678	64.4835	18.6983	4215.61	154.886
Capana00g001373	6.25893	3.76842	3.0536	1.01061	1.32459	1.55221	1.06339	0.924401
Capana00g001374	1.67296	1.49147	1.19404	0	0	0	0	0
Capana00g001375	5.73549	2.00357	1.64127	0.0293383	0.11823	1.01614	0.682026	0.0654097
Capana00g001390	11.9008	15.1208	11.1669	12.6602	12.598	12.2441	15.0676	18.132
Capana00g001392	3.32922	13.524	28.9967	6.85855	12.1911	25.121	20.6183	12.0963
Capana00g001393	45.9018	25.7888	25.9355	44.833	20.1983	20.3708	19.9975	21.2732
Capana00g001417	12.0997	23.1052	33.8681	26.2375	5.75631	5.39175	3.73645	1.375
Capana00g001423	18.0323	29.5806	62.3707	109.992	78.9019	206.027	58.9119	144.321
Capana00g001428	10.5055	3.37181	7.64618	3.80376	3.53353	4.07282	8.80366	4.38929
Capana00g001475	4.52967	4.66205	4.41013	3.47551	0	0.00551433	0.0453135	0
Capana00g001482	0.253903	0.587766	38.1955	0.130918	1.12692	0.400305	97.5252	3.32927
Capana00g001484	48.8668	20.7807	25.9732	28.8788	13.0243	26.6986	20.2279	21.1108
Capana00g001488	7.37433	20.5957	18.6534	19.0398	22.9782	17.6037	17.9559	10.9072
Capana00g001489	1.52924	0.913287	0.860449	0.678437	0.039596	0.062874	0	0
Capana00g001503	156.82	22.2818	15.0342	10.2105	16.1344	30.9235	20.5837	35.6402
Capana00g001506	1.24196	0.859553	0.203018	0.361329	0	0	0.070083	0.209759
Capana00g001507	43.5053	28.8293	1.87528	0.0214653	4.22575	4.6618	0.794898	0.062507
Capana00g001512	2.128	3.75152	7.49833	3.32661	0.330384	0.634383	2.14559	0.57144
Capana00g001522	8.96414	11.9196	16.5238	13.9266	22.6858	18.768	15.0947	27.6044
Capana00g001532	1.98318	4.34456	4.11381	1.90899	10.5376	18.3084	10.2716	15.7921
Capana00g001538	2.43808	4.46715	3.89584	2.80775	3.17441	5.6858	5.34132	6.09824
Capana00g001550	0	0	0	0	0.035348	0.813149	0.0775165	0.29195
Capana00g001593	13.4519	0.266008	1.35907	0	2.6878	1.98004	3.24705	1.83927
Capana00g001596	7.09055	8.84357	8.72941	40.9244	5.01008	10.8149	5.58049	13.2467
Capana00g001605	2.12619	2.30221	2.37178	1.55826	1.55418	1.6921	0.820013	1.22146
Capana00g001607	4.23816	3.09302	3.11824	4.20764	5.42353	9.20083	5.82449	7.24017
Capana00g001613	3.38143	4.52419	5.40663	1.98134	2.62257	3.06322	3.33113	2.66773
Capana00g001614	2.95887	3.61638	4.65205	2.10666	1.98388	2.37359	3.45082	1.56014
Capana00g001619	5.19752	3.18789	4.40522	7.39193	8.81984	5.66552	4.06433	2.86342
Capana00g001620	0.473997	0.210685	0.208163	0.174085	0.491041	0.56861	0.861911	0.8537
Capana00g001625	3.69671	3.8165	1.6871	0.311349	0.655215	1.60223	2.19012	0.898708
Capana00g001632	2.43225	7.68674	11.4667	5.22556	2.65174	3.7584	3.3147	1.02984
Capana00g001635	0.0455853	0.533042	1.41042	0.160384	1.21213	0.720294	0.543943	0.72841
Capana00g001638	3.69211	21.697	30.7994	54.843	21.5668	14.5236	22.332	30.2342
Capana00g001653	46.459	19.7432	0.874623	0.256182	0.383041	0.619141	0.327406	0.128016
Capana00g001662	1.3895	0.966201	1.267	3.02934	0.887621	0.94448	0.856351	1.00439
Capana00g001695	53.3783	58.7336	60.9315	71.2033	90.7658	94.293	58.5184	66.5386
Capana00g001699	9.47127	4.12655	4.0479	1.01255	7.23491	10.544	4.67967	1.95619
Capana00g001703	0.018809	0	0	0	0.512483	0.105124	3.29202	0
Capana00g001718	3.55209	5.47454	6.50203	4.92135	8.69007	9.92258	11.4714	13.2797
Capana00g001724	1.28364	0.67081	1.40827	0.825244	2.48682	1.39811	1.09594	3.798
Capana00g001727	10.3725	4.34605	0.98508	0.428482	2.55616	0.597795	0.513916	0.120928
Capana00g001738	9.39396	17.4049	9.27636	8.55598	9.54728	7.12064	12.7077	6.85636
Capana00g001746	6.18306	4.80029	4.16999	2.60952	1.38371	1.57949	1.55472	0.83274
Capana00g001767	5.80824	4.54785	3.87737	1.31194	0.264026	0.176948	1.58405	0.833187
Capana00g001776	1.73818	0.125349	15.0974	0.0646987	1.03352	0.622885	17.4286	9.59274
Capana00g001779	0.709735	0.798031	1.21371	0.533009	0.875941	0.505591	0.85948	2.08955
Capana00g001794	0.718938	0.820194	1.22612	0.250126	0.111034	0.43456	0.312883	1.28879
Capana00g001814	0.00662767	0.0152227	0.31613	0	1.24359	1.45784	1.8463	2.22552
Capana00g001823	4.65129	1.38492	1.95107	0.20236	0.755146	0.386713	2.39008	0.812431
Capana00g001827	44.1176	50.8657	28.0495	37.2893	29.5362	25.1325	26.2781	13.9025
Capana00g001833	1.60086	1.5843	1.97823	4.03027	0.393186	0.547847	1.05677	1.5607
Capana00g001842	39.8279	4.64193	0.605902	0.356717	2.84702	31.2619	12.0275	2.79004
Capana00g001854	30.8826	11.1986	16.5963	6.85999	5.39589	10.2682	10.3416	9.56606
Capana00g001861	0.224101	0.077904	1.11109	1.10662	0.0246935	0.020679	0.724309	0.159752
Capana00g001863	368.158	265.664	16.3679	0.307627	179.996	35.5064	16.8791	1.06761
Capana00g001870	2.80529	1.75428	1.24336	0.437858	0.88545	1.63532	1.3824	0.957739
Capana00g001872	5.77212	2.6866	3.15142	2.26429	0.492343	0.50326	0.930276	0.395689
Capana00g001879	6.79825	8.7277	28.0546	2.92469	11.5561	17.1747	12.4186	9.56171
Capana00g001880	13.6546	12.8543	18.4313	9.3502	25.6913	17.3052	16.5474	11.1783
Capana00g001881	0.246365	0.204004	5.47316	0.01841	1.07752	0.557611	5.72322	0.249863
Capana00g001883	20.2847	15.7747	16.0882	7.4367	19.4269	14.0486	11.3639	17.4772
Capana00g001893	9.81216	14.6473	7.35151	5.82403	13.7704	8.16301	20.6293	9.54122
Capana00g001896	23.2663	20.8726	22.0497	12.6435	7.96512	11.3569	12.7836	11.5517
Capana00g001901	15.4762	11.5303	7.66699	4.1619	2.13429	4.2837	1.66543	1.46287
Capana00g001907	6.11073	0.820333	1.11233	0.14435	0.367194	1.06574	2.44347	0.110383
Capana00g001918	22.0888	29.2978	45.0615	102.231	32.6203	85.8339	21.7463	45.1701
Capana00g001919	24.9194	28.6048	19.7967	26.2791	23.6753	14.4693	13.0588	13.9796
Capana00g001922	2.82597	4.55192	2.2219	0.601947	3.23245	2.92735	2.11752	3.33223
Capana00g001934	42.7746	10.7558	7.30845	3.91638	5.94032	9.6339	4.98316	6.10685
Capana00g001936	0.014376	2.59592	292.889	0	23.4679	18.0916	885.759	7.33848
Capana00g001942	1.71024	0.533299	3.42724	20.9852	2.04804	14.381	2.80667	12.5065
Capana00g001945	1.48952	0.736067	0.850171	0.400193	0.278687	0.416038	0.702867	0.267461
Capana00g001947	66.9567	11.9069	12.1258	6.73468	2.17452	7.72294	2.49864	2.88902
Capana00g001964	5.60652	5.58429	0.715863	0	2.95681	1.96853	1.13527	0.066411
Capana00g001969	0.221215	0.351045	0.999547	0.0389207	0.23165	0.184833	1.2059	0.513088
Capana00g001972	0.398482	0.470592	0.228443	0.163332	0.216162	0.286582	0.723742	0.177117
Capana00g001974	0.44818	0.361667	0.432209	0.288933	0	0	0	0
Capana00g001980	79.903	59.9112	57.3469	25.0948	80.4037	50.2955	39.458	8.01657
Capana00g001983	0.25321	0.00859233	0	1.28727	0	0.139885	0	0
Capana00g001985	4.8502	4.97661	4.57237	4.16744	9.13011	7.29233	7.81987	4.385
Capana00g001989	1.20919	2.06144	2.12911	1.12155	4.61236	5.5294	3.00608	3.83388
Capana00g001990	6.45637	4.44948	7.47686	2.81935	1.50306	3.01106	2.46878	3.17358
Capana00g002001	49.6861	126.427	145.542	18.1833	422.507	153.945	59.8199	116.206
Capana00g002007	16.9495	4.96024	5.33752	2.65051	2.99076	3.9425	4.29482	10.8672
Capana00g002008	0.159822	0.249137	1.93944	21.4642	3.43282	12.2617	1.96757	42.2933
Capana00g002014	0.28672	2.19029	0.522599	0.0413307	0.589657	0.593383	0.189076	0.0836087
Capana00g002015	0.300324	1.62495	0.647963	0.0332763	1.45979	1.78003	0.474603	0.109413
Capana00g002031	0.045287	0.00616867	0.0524293	0.00931133	1.12132	1.17931	0.216805	0.842984
Capana00g002081	30.4913	92.1417	112.352	81.422	167.359	178.945	234.007	176.555
Capana00g002089	0.098976	0.185398	0.066119	5.16158	0.363244	0.0800113	0.295546	0.85455
Capana00g002100	2.19964	3.33365	3.65641	2.16294	0.954816	0.85509	4.23032	2.54063
Capana00g002117	97.5279	135.734	144.129	180.304	161.522	113.822	133.71	84.8497
Capana00g002120	15.8542	3.55415	7.59839	1.42365	3.52707	2.8987	10.6296	2.44998
Capana00g002132	31.2859	16.565	20.3952	14.4912	11.2626	18.1442	10.4156	12.7465
Capana00g002134	0	0.0543693	23.5227	0	1.39373	0.27294	57.8418	77.123
Capana00g002157	5.9652	0.0502267	0.137158	0.0161187	9.17944	0.273441	0.562746	0.510145
Capana00g002160	0	0.0138373	0.199402	3.24945	0.263517	2.29609	0.22932	0.842109
Capana00g002166	4.84614	0.920952	1.84954	0.709131	13.4567	17.047	11.8871	9.67615
Capana00g002182	12.5948	28.0169	32.5559	41.2691	59.2418	33.426	33.0678	27.7422
Capana00g002189	35.7563	58.3903	73.4623	112.932	101.673	116.722	75.5564	171.363
Capana00g002200	1.05765	0.108183	2.62622	1.37293	1.34784	0.860239	3.55897	0.793637
Capana00g002205	29.8348	8.04957	6.73115	0.898695	3.32586	13.7056	1.92069	0.882781
Capana00g002208	0.752894	1.1335	1.00847	1.09301	1.57844	1.24043	3.40259	1.00571
Capana00g002225	3.71474	2.22927	1.93717	0.0123677	0.385154	0.715983	0.357814	0.1937
Capana00g002241	39.6436	24.7578	40.1238	44.2186	8.88044	15.2804	11.4634	15.8797
Capana00g002242	11.4966	6.18516	10.1451	0.488013	1.66868	1.89382	3.74613	0.092505
Capana00g002251	31.927	26.3111	29.2533	51.5076	5.55193	7.54895	6.82479	8.56628
Capana00g002264	62.8179	196.052	197.428	66.3659	100.372	159.784	142.662	15.208
Capana00g002265	8.75047	9.91797	10.8159	131.026	0.252439	0.514361	4.59053	24.952
Capana00g002267	0	0	7.63716	0.107097	0	0	4.10205	8.52029
Capana00g002279	14.8138	1.12898	0.629207	0.109809	0.131002	0.210038	0.288662	0.037235
Capana00g002284	8.33077	4.02989	15.0435	2.37537	2.8807	3.46505	17.9733	2.90119
Capana00g002289	2.39055	2.25189	3.59656	6.87926	3.18455	4.36521	4.94699	6.87475
Capana00g002305	0.120071	0.0312147	0.208502	1.53608	0	0	0.052207	0
Capana00g002318	20.3824	40.5565	61.5002	42.2744	33.1135	33.0472	23.8196	25.8007
Capana00g002320	3.38979	1.23753	1.97309	47.237	3.74796	30.9685	6.37882	8.09972
Capana00g002328	2.31405	1.09215	1.27629	1.20286	0.054464	0	0.081211	0.114973
Capana00g002335	1.33954	0.929318	0.746605	0.827463	4.44295	4.14501	5.19254	1.8145
Capana00g002336	2.36339	3.55161	2.12418	1.89126	10.0449	8.56031	12.2779	4.72133
Capana00g002338	1.38373	1.71303	4.39858	4.18039	2.5403	10.6411	10.4824	6.59949
Capana00g002361	45.1084	16.6398	10.6106	14.3273	7.69906	9.03431	4.19109	4.38286
Capana00g002363	0.0327847	2.60033	0.755803	7.56481	103.657	32.0699	52.3212	37.2226
Capana00g002368	1.16457	1.14835	0.658115	0.245369	0.148035	0.406036	0.214001	0.079144
Capana00g002374	14.6245	10.0547	8.57169	2.1996	3.97537	4.74712	3.25706	2.2125
Capana00g002389	8.76573	16.7115	16.6114	8.23944	4.21512	8.55344	5.91708	8.55874
Capana00g002390	104.945	61.33	30.2288	31.5846	36.4543	37.9575	22.9797	26.1751
Capana00g002391	0.0649897	0.0150703	0.106909	0	0.407106	2.54824	0.074197	0.0357723
Capana00g002392	12.943	18.437	9.9902	10.3244	66.4039	27.3867	67.2754	14.6914
Capana00g002400	0	0	0	0	0.545434	0.782589	0.587602	0.667706
Capana00g002406	5.80417	1.82095	3.26218	0.629616	1.30683	2.71178	3.22126	0.448714
Capana00g002411	14.8679	6.11495	5.76973	1.9449	1.41478	0.983285	2.55928	1.97958
Capana00g002415	6.44415	1.99329	2.8102	1.18736	1.42927	2.03236	2.00604	0.967849
Capana00g002439	19.165	17.7825	16.5561	12.8123	12.3716	11.5637	13.8576	19.9249
Capana00g002441	36.589	8.72365	0.891537	0	0.248585	1.32223	0.390408	0
Capana00g002444	285.44	172.094	59.1685	7.52398	102.921	187.698	142.669	15.9905
Capana00g002451	2.72356	1.2644	0.574546	0.940792	0.338684	0.968297	0.533987	0.628131
Capana00g002452	63.6789	39.1829	28.0465	20.565	10.8049	17.4362	14.1783	13.2811
Capana00g002453	34.3663	34.9761	46.7801	14.131	4.9885	8.51928	10.2857	2.26161
Capana00g002483	13.4275	21.0603	34.0584	19.127	31.836	40.5339	34.0363	21.5683
Capana00g002490	30.9675	27.7883	17.4003	17.3082	12.3104	37.9672	35.3224	19.1849
Capana00g002492	0.373393	0.247417	0.91235	7.47122	0.867968	1.58246	0.081739	69.0872
Capana00g002493	9.38832	2.18681	0.980724	0.620869	1.31961	1.14251	2.04164	20.7709
Capana00g002494	13.7072	13.8946	15.7798	7.0023	34.9923	47.1052	52.5866	14.365
Capana00g002498	14.1938	8.0849	7.88448	7.8657	4.58732	4.94906	8.27379	6.90482
Capana00g002499	7.7321	6.77262	9.25814	10.623	15.408	13.0246	12.2485	14.1155
Capana00g002501	55.2152	13.2947	15.681	0	6.11131	5.46053	21.5905	0.253755
Capana00g002502	4.77988	4.96324	4.62184	64.3695	6.87908	8.63126	7.85583	28.8651
Capana00g002511	9.36118	1.34348	2.40239	0.0922197	0.098844	0.218444	0.217146	0.043149
Capana00g002531	549.53	560.119	291.21	218.707	498.589	526.832	607.082	290.92
Capana00g002532	0.409249	1.25324	1.09706	1.54231	3.62292	0.419896	0.766385	5.38123
Capana00g002533	0.530655	1.24274	0.228751	1.15197	3.53897	0.514773	0.564096	4.44947
Capana00g002537	0.838558	0.451755	0.242397	10.6001	36.5891	13.4297	3.93763	38.4409
Capana00g002538	23.9409	5.54023	1.53922	0	32.9294	24.4342	3.09442	1.84754
Capana00g002539	0.126316	0	0.039634	0	10.877	0.325466	0.818791	0.760983
Capana00g002540	2.39817	0.0477073	0.0265483	0	0.414695	0.0830143	0.012034	0
Capana00g002541	24.6127	0.543977	35.6214	18.3481	0.13075	1.98787	29.1252	0.128034
Capana00g002544	9.28284	6.29376	4.9907	3.12719	10.7767	7.28064	13.7702	8.85974
Capana00g002546	32.3401	13.3884	16.2609	8.37308	10.3492	14.4441	15.1395	9.41684
Capana00g002558	0.840132	2.49773	1.50113	2.26463	6.4146	13.9872	11.3859	16.9358
Capana00g002564	15.9081	28.2641	6.6442	6.5683	31.3447	18.7129	11.3117	8.99415
Capana00g002572	7.81696	3.34538	4.62615	1.43864	2.42041	3.30418	2.11259	1.80905
Capana00g002588	0.0206993	0	1.74514	0	0.0578905	0.0329577	0.978387	0.173254
Capana00g002600	13.9671	22.4475	19.312	12.5097	24.9597	35.1633	16.406	24.558
Capana00g002610	11.6118	9.86718	10.4722	5.25365	3.87429	6.42824	5.32514	4.17906
Capana00g002614	9.6716	5.49038	7.01482	3.16364	0.045548	0	0.998184	0.0792783
Capana00g002619	1.06571	2.46025	3.00148	1.90382	3.24688	5.08662	1.10535	2.02444
Capana00g002620	60.2202	78.3355	59.8861	4.92699	13.1284	23.9312	14.7734	3.08098
Capana00g002622	0.0242727	0	0.0190043	0.0320813	0.596535	1.53155	0.283514	0.974257
Capana00g002623	0.0138483	0	0.118128	0.0345377	0.225217	3.00276	0.275579	1.01599
Capana00g002626	0.492089	1.23498	1.59293	3.43696	2.30257	8.15437	1.9608	2.15682
Capana00g002628	0.028885	0	0.124741	2.28065	0.267144	2.14586	0.33802	0.625399
Capana00g002629	0.190514	0.0358263	0.081475	0.0387443	0.901364	2.18781	0.631136	0.671919
Capana00g002633	0.149044	0.119032	0.412791	0.0417567	1.22945	2.3253	0.062211	0.106697
Capana00g002634	0.019692	0.0685657	0.075653	0.512241	0.983582	1.25397	0.524747	0.464324
Capana00g002636	24.7665	61.7697	87.2715	86.5892	150.565	90.0609	55.4645	153.393
Capana00g002640	1.77576	0.217172	0.0750333	0	0.0369075	0.0442343	0	0
Capana00g002643	13.4546	6.37817	3.43521	0.426974	2.45525	3.1213	3.3152	1.05124
Capana00g002646	63.2024	42.4968	45.9089	55.2261	17.3957	36.1574	38.8303	43.9244
Capana00g002647	0.752293	0.224329	0.507671	0.973279	3.88019	7.10741	2.16534	3.66924
Capana00g002648	34.2511	18.881	13.4645	17.3926	14.4243	45.0003	10.8908	4.29585
Capana00g002653	0.258573	0.917149	1.55985	0.525865	0.278406	0.484086	0.442018	0.328642
Capana00g002657	4.76282	3.68124	3.9702	1.76107	1.22386	1.90494	1.81555	1.35455
Capana00g002702	12.8635	3.6486	1.52554	0.322325	2.40798	1.03236	1.26964	0.861105
Capana00g002708	2.13735	0.232668	3.46585	0.184122	2.60645	1.68081	4.04938	1.07045
Capana00g002724	13.2346	17.93	10.5136	8.90647	36.5495	16.4174	18.6438	19.3821
Capana00g002725	3.5413	3.43207	2.67042	1.02855	1.32019	1.32906	1.60994	1.14265
Capana00g002726	0.376163	0.395057	1.33842	1.9611	4.14621	4.55594	2.91322	0.648131
Capana00g002729	8.53401	5.46679	5.67754	2.29921	14.8714	6.32473	4.28667	4.2694
Capana00g002732	32.349	25.8881	5.18582	0	3.18288	6.09067	0.422915	0.0522233
Capana00g002736	2.15621	0	0.840276	0.0447223	1.83094	0.0906167	1.2951	0.684477
Capana00g002739	20.3253	17.2998	48.7886	102.757	41.9429	18.1656	35.9048	719.093
Capana00g002740	0.299707	0.532928	0.296598	0.20429	1.12736	0.925951	1.18138	0.745674
Capana00g002742	16.7703	22.9343	42.8981	35.0867	12.2405	13.7834	22.6065	8.09484
Capana00g002745	0.178965	0.114157	0	0.287245	0.465043	0.0702197	0.163031	22.8915
Capana00g002746	3.0486	0.135385	0.135995	0	0.0717855	0.109327	0	0.103911
Capana00g002752	40.5113	21.151	4.89551	1.22204	7.14736	6.04584	2.91502	1.17896
Capana00g002753	13.5993	0.0159703	0.0474057	0	6.31088	2.1242	0.212772	0
Capana00g002758	0.695086	0.0432093	0	0	0.031828	0.0455433	0.196076	0
Capana00g002761	0.875443	0.507021	0.248732	0.490589	0.0819775	0.0886523	0.090071	0.425918
Capana00g002763	0	0.51641	88.0761	0	2.70134	1.09123	161.365	25.7114
Capana00g002764	0.462719	0.839799	1.41903	0.819425	1.14678	2.97926	1.55944	0.839932
Capana00g002765	0.515134	0.177965	0.217634	0.122299	0	0.470367	0	0.841492
Capana00g002767	6.46541	8.27943	6.5523	9.32793	0.358507	0.192629	0.552858	0.253914
Capana00g002777	24.8258	36.324	15.9235	0.630112	8.1484	14.5146	9.88785	0.338729
Capana00g002782	1.81568	4.08899	2.34984	2.29031	3.42379	2.47233	3.40351	3.44403
Capana00g002788	27.9549	68.4893	24.219	0.043492	22.2239	26.1912	15.566	2.14076
Capana00g002790	33.1561	7.94398	6.55909	1.73859	4.56094	4.14906	1.02469	0.475528
Capana00g002791	50.062	0.148203	0.323359	2.22011	0.740957	2.56869	0.406885	0
Capana00g002792	29.7189	19.8053	17.2005	44.6801	76.4058	27.7364	15.3643	15.991
Capana00g002794	8.68237	3.19186	2.44509	0	5.85104	1.12509	1.42301	0.481777
Capana00g002797	7.365	1.12881	0.419314	0.348694	6.96112	1.21512	2.04585	1.40714
Capana00g002802	192.252	63.1202	5.4194	7.5816	681.466	65.5528	109.938	114.155
Capana00g002807	5.66296	1.503	3.39402	1.92308	1.11106	4.85593	3.28082	0.177595
Capana00g002827	9.84951	9.47059	10.0378	21.9729	6.79877	10.9908	10.9362	8.71672
Capana00g002843	9.08498	12.7706	7.73214	16.675	15.9211	10.8326	21.8441	7.81757
Capana00g002844	2.35428	1.00597	2.87816	0.853852	0.290174	0.38771	0.692477	1.04989
Capana00g002846	16.9843	11.7405	6.94853	12.5731	2.53961	6.55062	8.62968	2.47518
Capana00g002849	1415.15	284.662	71.8721	14.0683	97.5283	49.7276	46.1701	72.3494
Capana00g002850	2.66856	3.60771	2.97563	2.77711	1.78687	1.59477	1.55842	1.87582
Capana00g002861	75.9771	57.8085	25.2443	18.6703	66.8318	42.3445	43.1705	29.0666
Capana00g002869	0	0	0.0346703	0	6.78538	6.8691	5.68373	3.76039
Capana00g002874	0.183268	0.846313	0.93284	28.7929	1.61554	11.6015	2.67625	6.37919
Capana00g002879	34.4624	41.9872	57.6971	33.6605	34.5923	63.2457	37.8272	72.7751
Capana00g002881	2.61432	1.02008	4.90123	0.510166	32.009	13.8152	9.39747	10.5163
Capana00g002882	12.1267	4.40974	3.62691	24.6008	1.63307	5.52242	2.82289	3.0058
Capana00g002884	20.6845	20.8698	18.0142	72.9206	21.4233	22.4769	14.6664	36.3265
Capana00g002885	16.3467	2.12949	0.0703467	0.011978	1.97123	2.72613	0.393813	0.0680633
Capana00g002886	44.6285	2.51082	1.81586	0.0689573	2.14379	2.23012	1.14573	2.77187
Capana00g002887	47.4148	41.3854	18.5859	10.8424	20.6811	15.335	11.8688	16.5633
Capana00g002895	172.653	195.225	38.819	5.21367	13.2898	23.3683	21.7231	6.52227
Capana00g002896	287.552	119.621	150.233	190.614	16.3278	60.5973	62.2079	13.3812
Capana00g002897	3.03079	11.5232	10.4146	0.725823	1.76404	10.8145	2.07319	3.84336
Capana00g002899	2.11361	2.43645	5.91359	33.5579	17.2352	14.0564	12.7663	45.27
Capana00g002901	8.1164	10.9717	7.14061	1.91098	2.94626	2.19455	5.48286	1.80737
Capana00g002902	3.37923	5.42715	5.81105	3.75142	2.0155	1.5118	2.62187	2.12233
Capana00g002920	14.7258	30.967	16.5534	8.35941	6.25625	2.96097	2.13557	6.08154
Capana00g002921	31.1099	33.6911	24.0425	0.866442	13.9544	9.88628	10.6061	0.808654
Capana00g002931	6.5706	0	0.057331	0	0.0209485	0	0.0706305	0
Capana00g002944	2.45452	1.68969	1.82111	1.15359	0.776331	0.691592	1.39496	1.13216
Capana00g002945	0.310879	0	0.0800603	0	0.48526	2.30865	1.32328	0.0719113
Capana00g002948	6.34181	2.17619	12.3857	67.6388	6.26999	6.34501	3.39693	20.4585
Capana00g002954	11.4527	5.75564	4.61681	3.6723	3.07604	4.26928	5.94805	4.0747
Capana00g002957	3.13506	1.7522	1.58932	1.63077	0.524314	1.04869	1.01116	0.97134
Capana00g002958	14.192	9.16057	10.0572	10.4984	3.43687	5.02623	5.91889	4.95134
Capana00g002967	0.724934	2.03828	0.641062	0.633123	3.68298	10.9105	2.90078	3.28529
Capana00g002981	8.51484	19.0954	11.0436	12.2274	8.15587	20.2255	9.18346	1.84723
Capana00g002988	39.6755	32.2348	29.6498	68.8204	26.2	49.684	24.6409	24.9881
Capana00g002990	16.413	17.2891	3.17767	0.052625	4.96322	0.862606	3.22764	0.385086
Capana00g003000	8.15276	6.862	5.61516	6.78684	10.3678	8.22415	12.9904	9.37556
Capana00g003005	24.2168	16.3554	19.5733	14.1873	6.37563	10.62	11.9409	13.1621
Capana00g003014	2.99608	1.74884	5.99889	3.95545	3.90099	5.00538	5.31518	15.0942
Capana00g003023	3.65136	2.38125	0.0337293	0.357955	0.161145	0.0523697	0.075732	0
Capana00g003075	10.8946	19.7675	20.6751	49.4606	22.2461	21.9239	25.39	34.4025
Capana00g003079	66.2101	62.9408	50.8681	46.5584	110.074	115.723	86.7297	150.336
Capana00g003080	2.82255	0.0519917	0.026879	0	0.040452	0	0.0231785	0
Capana00g003081	0.354646	0.0240523	0.466227	0.0564313	0.263666	0.633323	1.11326	2.37556
Capana00g003083	6.47485	10.875	7.08056	48.672	16.4444	37.2509	12.0529	33.6553
Capana00g003084	15.8869	7.75895	5.90436	0.961785	4.29896	4.53773	3.88639	1.38956
Capana00g003085	57.0126	53.8055	43.3528	2.43319	27.4214	30.5119	13.6359	6.87973
Capana00g003090	12.3866	8.18328	12.7809	7.92009	3.20607	3.36605	7.14287	5.36319
Capana00g003094	58.3268	90.7467	36.266	61.4669	45.4866	110.957	94.3355	30.7546
Capana00g003105	91.395	62.492	75.5197	69.0662	493.146	205.125	260.192	969.749
Capana00g003107	2.29299	2.58885	3.20863	2.15141	1.3691	1.97802	2.70132	2.97472
Capana00g003110	2.03416	0.286183	1.56805	0.155656	0.284613	0.155283	1.48457	0.109735
Capana00g003111	133.792	171.876	200.906	81.732	505.314	259.403	120.277	87.2671
Capana00g003122	16.4615	2.46276	1.65569	0.0192137	1.48059	1.19406	1.33622	0.0698073
Capana00g003129	116.839	194.872	85.0637	18.433	287.736	85.9748	92.9813	22.6627
Capana00g003130	302.592	592.691	217.971	12.9464	518.509	383.387	359.825	33.3975
Capana00g003140	7.89414	3.49623	4.69981	3.13807	1.4857	2.34818	2.90444	2.6093
Capana00g003141	0.27138	0.230507	0.351032	0	0.779822	1.00965	0.527255	0.96542
Capana00g003144	2.86446	13.2742	10.0513	1.01065	3.6592	4.08249	1.97485	1.30817
Capana00g003152	4.76051	3.44087	3.25901	2.82713	1.04903	1.51188	2.45774	1.64571
Capana00g003163	0.230719	2.14826	10.5552	0.392523	1.66132	1.27199	7.09073	6.81682
Capana00g003169	8.30357	6.03188	4.50114	2.44684	1.32856	1.86707	1.62644	2.93818
Capana00g003179	7.46064	6.20872	4.96737	1.88011	4.9705	5.58002	1.91592	0.893129
Capana00g003194	44.5413	34.7282	47.3687	22.8926	180.019	52.7879	71.0083	32.0198
Capana00g003200	6.50026	10.7696	10.1111	7.50001	11.1565	13.842	10.4709	11.5404
Capana00g003201	11.2565	6.41244	5.18445	4.47098	2.86921	7.11395	4.96317	5.6101
Capana00g003208	2.86845	2.63077	3.6051	0.953569	5.54572	10.3303	6.22183	4.12647
Capana00g003230	36.533	25.1401	26.878	16.966	23.5788	30.7221	19.2792	14.5854
Capana00g003231	6.51664	4.95137	2.75237	32.7908	4.48949	15.1323	1.91441	6.45381
Capana00g003234	3.42939	5.5585	4.74192	4.47169	2.70605	2.52363	2.50592	2.15351
Capana00g003235	18.2422	9.46935	11.7164	8.3972	4.03871	3.7039	3.90012	0.964148
Capana00g003237	20.352	5.74033	4.06418	1.67733	1.25225	1.66152	1.67139	0.520866
Capana00g003241	0.434272	0.80295	0.991354	0.490567	0.269361	0.276265	0.343793	0.0310917
Capana00g003255	10.1878	9.4715	17.2249	11.1226	14.5677	19.4181	15.088	18.1469
Capana00g003256	17.1576	9.37354	11.7399	48.7284	11.8277	48.9495	14.4629	5.42956
Capana00g003260	1.30942	1.73911	1.52003	24.419	7.86987	11.0535	3.54163	12.7732
Capana00g003264	1.08835	2.93157	3.46989	2.91493	10.9788	11.3642	9.1631	4.0496
Capana00g003265	12.6222	20.1068	15.9301	28.3643	20.7896	21.3596	20.0423	24.7446
Capana00g003266	56.2479	88.7157	9.68724	0.134279	1.85415	6.04929	3.46588	0.0825797
Capana00g003269	21.2006	16.8345	21.3091	35.7287	6.96466	7.934	9.19116	14.4039
Capana00g003270	14.5294	14.701	9.45623	3.35274	5.30903	7.08906	6.86819	3.50836
Capana00g003271	10.8994	0.64699	1.92663	0.240755	0.418427	1.09694	1.33253	0.436122
Capana00g003273	16.8267	19.7751	17.9273	1.12318	8.67528	7.08243	4.27229	0.939933
Capana00g003275	61.3324	65.7113	24.5429	33.9357	80.0801	31.6473	124.163	43.8231
Capana00g003277	9.20584	8.8362	13.4451	8.62742	8.72048	14.5081	11.6293	19.9303
Capana00g003278	3.42132	2.09513	1.83776	1.18226	0.96138	1.1953	1.25255	2.42571
Capana00g003281	26.5329	11.2522	14.5495	15.2882	5.66308	7.08639	9.25928	11.27
Capana00g003283	11.2383	13.2737	12.08	120.932	6.99374	12.052	8.26309	35.0626
Capana00g003284	555.726	1326.81	930.465	1753.82	1115.38	1222.59	975.422	586.044
Capana00g003298	11.8234	11.4656	9.82197	14.5705	13.4507	14.5383	10.8151	40.4992
Capana00g003300	5.5373	9.83066	6.99032	8.62609	10.1591	7.90944	8.49465	9.12006
Capana00g003301	0.603496	0.854027	1.50415	1.97104	2.2787	2.79968	1.62027	4.60781
Capana00g003322	540.106	607.91	73.0257	8.51038	33.6797	56.7649	23.3756	9.79653
Capana00g003337	5.59356	3.47518	0.883339	0.470434	0	0.114382	0	0.205017
Capana00g003352	16.8201	2.19958	5.00343	3.27432	1.14142	1.34248	0.840263	0.0977347
Capana00g003368	2.89411	0.169545	1.0913	5.46049	3.99752	3.70624	1.45963	2.61773
Capana00g003369	14.1404	10.0412	11.6503	44.6482	8.44502	20.9509	12.7125	17.9881
Capana00g003373	22.4782	17.2469	11.4286	18.2595	14.0809	16.2195	16.7508	7.4774
Capana00g003377	7.57135	7.6945	4.93237	0.887827	1.68882	2.54154	2.44663	0.916104
Capana00g003380	6.97919	7.3036	9.04602	5.98413	12.4005	16.2905	8.92968	8.54141
Capana00g003384	0.0607037	0.111053	0.560968	0	4.67434	18.0602	1.5528	4.61059
Capana00g003385	0.04414	0.0431057	0.464282	0	2.04793	8.02297	1.58904	3.14659
Capana00g003389	3.49242	2.37387	2.6479	1.61458	1.21101	2.81607	2.23088	2.3016
Capana00g003391	10.1477	11.3605	9.51394	10.725	22.8988	16.1919	16.0165	11.1847
Capana00g003396	0	0	16.6213	0.011969	0.093263	0	4.34204	20.8959
Capana00g003397	102.382	56.7156	32.419	21.3201	27.3067	13.6208	28.8678	60.8815
Capana00g003399	41.7534	29.2279	33.5874	1.56296	12.4405	9.58764	9.88975	10.237
Capana00g003400	12.6164	5.56708	2.86455	0.300037	3.32359	8.01374	2.55931	2.63093
Capana00g003405	72.6389	209.245	53.6347	8.82752	378.306	243.68	103.446	32.8997
Capana00g003406	33.6114	71.5032	63.7618	39.6994	80.2729	76.8279	65.0063	40.3394
Capana00g003407	167.021	50.8518	71.0508	6.21519	9.61278	16.656	13.8964	5.32471
Capana00g003411	6.3443	2.97501	2.54858	0.377351	4.82048	2.77059	1.8307	1.15312
Capana00g003418	1.80655	0.50173	6.38803	0.0158407	4.33477	2.95833	3.20118	1.4228
Capana00g003428	7.72361	9.48649	22.9355	26.8493	24.8281	24.7657	18.9612	46.4436
Capana00g003429	16.4514	8.15624	14.2145	26.033	6.58145	9.3805	5.99337	6.16194
Capana00g003434	2.28632	0.160484	1.06352	0.046149	0.356171	0.084552	0.807637	0.187648
Capana00g003436	19.6024	0.633709	2.12334	0	0.879538	0.877032	1.37754	0.0366787
Capana00g003446	0.053065	0	0.0311977	0	0	0	0	0
Capana00g003452	3.39086	2.12825	1.6512	4.92094	0.028202	0.174915	0.269518	0.822217
Capana00g003453	132.47	301.868	325.415	258.92	266.778	321.057	257.106	328.436
Capana00g003454	0.660657	2.09508	3.37834	1.01198	3.61301	2.45509	3.75932	6.35858
Capana00g003466	13.4875	13.7685	12.6108	19.611	4.31581	9.11384	8.93851	9.37076
Capana00g003472	7.57238	37.3572	54.4355	60.0912	40.599	41.4911	41.1082	37.0129
Capana00g003487	3.32445	7.25064	8.50895	1.9386	20.3268	11.2287	15.4998	4.56014
Capana00g003506	44.4385	42.5349	34.586	2.44521	14.3475	14.1153	11.0933	3.8461
Capana00g003511	12.2503	11.7821	20.4585	10.0695	5.53074	9.58791	5.61182	5.53089
Capana00g003515	2.90698	4.57319	5.22232	8.65302	6.39841	4.63312	6.56457	4.26235
Capana00g003537	11.5159	2.3841	2.08705	1.55928	0.867927	1.17933	1.20571	0.695811
Capana00g003542	486.057	1327.19	1361.23	1054.99	1908.4	2027.67	1684.33	1272.12
Capana00g003548	9.51579	17.1415	18.3515	11.016	27.909	27.5773	26.1841	38.0261
Capana00g003552	41.4983	9.37724	10.5901	0.392706	1.29483	8.10217	2.66826	1.92658
Capana00g003559	0.256788	0.222053	0.807738	2.58409	2.0933	3.9564	2.37297	3.09273
Capana00g003560	74.4253	55.5629	0.410606	0	3.8402	0.129814	2.10911	0
Capana00g003566	17.282	12.7491	11.6957	16.7411	9.59925	6.21443	8.73348	7.8851
Capana00g003571	34.61	27.5307	29.4817	39.6867	28.4464	32.2658	23.9055	16.2728
Capana00g003581	3.5008	3.33516	2.76566	1.58075	1.48045	1.91804	2.79394	1.46845
Capana00g003591	1.15523	0.235055	1.3441	1.45618	0	0.0732683	0.219155	0
Capana00g003596	4.32048	4.17984	6.4556	11.0873	60.9546	114.566	16.2818	25.5174
Capana00g003597	0.546192	0.270761	1.19392	0.0508577	0	0	0	0
Capana00g003598	0.0527413	11.072	173.767	86.3666	18.3525	56.1462	54.9226	128.016
Capana00g003600	5.66938	8.56834	16.9107	0.0696683	0.873586	1.18208	1.50904	0.0762407
Capana00g003602	2.16722	0.29491	0.147459	0.098404	0.014879	0	0	0
Capana00g003603	12.9569	15.7132	27.4996	4.89713	44.891	35.5691	14.6734	14.4028
Capana00g003616	0.596324	0.488919	0.508197	0.079509	4.51095	8.39318	2.76696	5.034
Capana00g003638	3.01957	2.51981	3.2164	14.5681	8.94023	6.53111	10.8755	27.5909
Capana00g003643	4.68613	12.0009	42.1361	80.8809	16.8902	20.1765	37.8002	106.165
Capana00g003650	1.92785	1.16422	1.05242	20.1189	0.231756	1.04874	0.700121	2.53247
Capana00g003654	0	0	0.16688	0.465237	0	0.112819	0.323951	0.148939
Capana00g003657	13.7124	6.16281	6.80633	3.91244	4.96078	3.53476	5.75379	4.66366
Capana00g003658	6.07805	11.2281	14.2968	7.59336	12.4036	15.7573	10.853	14.3295
Capana00g003661	56.934	26.2906	19.682	18.048	18.4959	21.0895	19.8247	23.8547
Capana00g003666	35.8327	9.24989	6.31515	4.38747	5.31256	8.71968	9.61433	2.12091
Capana00g003667	0.886889	0.216443	0.251562	0.011527	0.0712625	0.0584217	0.063701	0.0119587
Capana00g003669	26.1402	11.0357	16.5936	21.1109	10.9408	11.496	7.16838	11.4073
Capana00g003671	6.92263	4.23779	4.32686	1.15217	1.12531	1.27461	1.63341	0.583507
Capana00g003675	9.10986	20.7077	90.5671	236.473	60.484	49.8134	58.2795	104.465
Capana00g003678	20.7538	13.411	19.5853	15.1076	15.3363	10.9818	7.81042	3.46814
Capana00g003680	1.03564	0.550919	0.9437	2.8586	2.54217	2.72541	5.43845	4.97741
Capana00g003683	9.83401	11.7108	25.9942	28.314	10.6554	12.7624	14.2622	14.8112
Capana00g003685	1.49439	0.66759	2.38712	3.52915	20.1971	2.7394	11.6612	5.01152
Capana00g003686	4.35871	9.37258	17.0968	12.5174	6.26362	7.66653	8.32567	5.51901
Capana00g003691	48.0774	183.741	124.36	913.831	197.391	550.367	215.446	188.847
Capana00g003692	36.4297	21.8328	3.49742	22.9373	6.30229	7.94543	5.40591	1.75824
Capana00g003718	1.02348	1.10929	1.472	1.72216	2.39888	3.24092	5.50259	3.96256
Capana00g003723	6.43655	1.15735	1.17887	0.810237	1.05292	1.06425	1.48889	1.01862
Capana00g003729	4.05726	6.57884	6.19658	3.14365	9.82908	9.87508	10.9226	7.28543
Capana00g003749	61.2757	179.959	188.845	613.135	226.931	170.042	206.134	198.355
Capana00g003752	5.78901	7.36978	5.79984	8.0078	7.77714	5.30765	3.38201	6.62005
Capana00g003762	38.2183	19.9811	23.5112	11.7359	8.98856	13.0251	14.0654	10.1902
Capana00g003767	86.4553	291.423	100.637	10.2704	128.942	45.507	16.4443	7.67216
Capana00g003768	132.14	194.649	161.286	127.767	73.1491	104.494	53.8056	41.2821
Capana00g003769	491.861	586.392	337.583	224.441	143.882	180.675	115.988	73.6458
Capana00g003772	12.9602	9.35782	10.0925	10.2949	4.42965	9.17838	6.69259	6.89595
Capana00g003774	7.11494	7.41617	6.64623	17.2385	10.3414	15.7836	7.19261	20.6276
Capana00g003775	7.05616	3.37819	3.95806	3.68488	9.77267	10.5225	5.13106	3.69204
Capana00g003778	0.276969	0.604641	1.29575	0.235927	2.01261	2.36431	1.36496	0.324151
Capana00g003781	1861.63	80.5325	406.956	5.47916	22.2721	70.3642	174.976	0.120945
Capana00g003783	82.4597	161.593	104.424	97.27	60.3503	63.691	65.0631	36.4545
Capana00g003785	4.92647	0.341518	1.44529	0.0501923	0.458008	0.363217	0.523273	3.1578
Capana00g003789	2.60904	3.06748	2.60602	1.66458	2.11965	2.43527	1.29915	0.536148
Capana00g003790	0.875624	0.0725983	0.0325337	0.322965	0.0356775	0.105918	0.0547705	0.0338893
Capana00g003808	5.00763	0.770041	4.33155	0.109323	0.788633	3.41193	0.501221	0.254413
Capana00g003809	22.0943	10.3064	17.4242	19.2828	8.90597	19.5324	22.9817	8.93247
Capana00g003816	51.1453	98.2604	85.709	8.8479	56.871	97.6605	74.9842	20.5877
Capana00g003817	3.97442	17.4086	10.9311	50.8127	32.6305	24.3774	17.0807	65.7053
Capana00g003825	0.812999	0.757981	0.405269	0.41483	0.063961	0.00917267	0.287601	0.0373183
Capana00g003826	12.2284	10.217	9.51983	5.05342	2.27698	2.64172	3.07555	1.77827
Capana00g003837	16.5795	19.0389	14.0771	24.6549	27.1385	33.0304	25.135	19.8363
Capana00g003839	7.66067	22.5613	32.3325	176.373	47.8148	20.6294	22.9584	244.149
Capana00g003844	0.156744	0.400227	0.205585	0.113953	0.635798	1.19572	0.981073	0.333919
Capana00g003846	10.9365	8.325	6.46501	6.35704	7.5517	11.1705	15.3278	9.96649
Capana00g003850	50.0366	43.874	44.8727	45.3381	83.7812	50.6904	42.7276	24.7046
Capana00g003858	0.470901	7.34037	4.33931	30.1465	3.25206	33.5075	4.6863	13.5997
Capana00g003863	56.0708	33.8895	68.883	22.472	18.1926	30.6243	42.3665	26.7652
Capana00g003885	20.9197	0	2.16237	0	0.238646	0	4.06481	0
Capana00g003889	4.87122	2.39538	1.64972	2.61723	1.59072	3.12627	1.34769	2.54211
Capana00g003903	1.93911	3.45663	2.95544	2.25545	0.520897	0.688857	0.865633	0.250402
Capana00g003921	27.0339	19.0502	17.5607	11.8971	8.95388	14.1735	9.47539	9.57176
Capana00g003922	7.62078	12.9596	14.6485	10.3607	18.5488	13.2429	11.5265	12.9418
Capana00g003923	7.76079	9.99399	7.736	9.41726	12.56	8.9466	11.3547	9.19378
Capana00g003932	5.54491	6.67093	9.72818	9.52758	4.51434	4.60474	6.01814	4.5708
Capana00g003939	1.12056	2.13738	0.846056	0.809373	0.276054	0.249284	0.214956	0.169261
Capana00g003942	2.50855	2.60935	2.26336	7.15991	0.009349	0.188951	0	2.1346
Capana00g003943	45.9741	84.1151	83.0192	126.92	85.4219	77.2876	99.9741	95.2091
Capana00g003944	4.57502	0.882022	5.89549	76.2095	0.931028	1.27013	2.0107	14.1316
Capana00g003947	0.356724	0.0690423	1.6579	44.6344	0.0340955	0.0498283	0.819929	1.72742
Capana00g003949	6.30236	8.30292	9.20269	9.78372	7.2187	8.33246	7.52335	13.0626
Capana00g003951	10.3714	9.92144	7.60816	2.80781	3.38269	2.54801	4.84731	1.51358
Capana00g003955	7.43798	3.6021	2.67662	2.82627	1.11539	0.970023	0.662952	0.921394
Capana00g003957	1.76181	0.196795	8.96571	0.0838707	0.990564	0.94552	5.40312	0.422069
Capana00g003963	0.0610043	0.0144063	5.57736	0.022661	0	0.095969	11.9605	6.55258
Capana00g003966	5.22336	0.979523	2.75117	6.50385	3.57497	6.8232	1.62451	40.1123
Capana00g003967	0	0.007883	0.217477	0.0410423	66.9174	37.6247	51.7774	34.8841
Capana00g003970	1.59418	1.44305	6.47191	5.97338	2.9358	5.8229	5.03005	4.84883
Capana00g003978	2.03622	1.5708	1.21701	0.099569	4.35616	5.21824	2.61546	0.779858
Capana00g003979	6.03617	5.69087	6.23358	3.92232	4.2905	4.63441	4.72696	9.46793
Capana00g003980	11.1924	3.60901	4.1926	0.21572	0.526845	0.288981	2.91881	0.271636
Capana00g003982	4.52606	6.66507	7.81642	1.24819	9.60045	9.82126	22.3591	14.8426
Capana00g003984	15.7359	11.8573	4.01848	0.493287	1.13583	0.72635	1.11302	0.345919
Capana00g003998	9.53779	14.0148	10.9676	14.8359	8.47441	10.3479	6.37151	5.67958
Capana00g004002	0	0	0.00911267	0	2.73522	3.58754	2.39137	3.40298
Capana00g004010	0.907448	0.727337	1.24974	0.251791	0.124413	0.169693	1.26064	0.354815
Capana00g004015	14.3132	10.636	10.0806	8.75716	5.9809	7.41582	7.84822	7.61017
Capana00g004021	26.4737	28.2646	59.1873	23.6255	57.8342	48.1339	40.3526	15.8043
Capana00g004034	4.72953	12.4782	24.175	12.7013	33.581	19.1627	15.6398	7.93055
Capana00g004035	0.144806	0.200205	0.40167	5.0394	0.337558	0.0591687	0.170366	0.79629
Capana00g004036	19.0771	24.5807	10.0297	11.8615	12.6581	10.0088	12.1279	10.7221
Capana00g004053	31.7928	6.42601	6.06837	0.0300763	10.773	25.7006	11.6048	0.099156
Capana00g004055	25.0605	22.2404	34.0682	6.7949	11.1666	16.3707	17.2785	20.2921
Capana00g004063	38.4391	42.3229	32.5031	45.7435	30.741	36.9452	34.535	22.0035
Capana00g004066	68.5583	36.4148	37.5606	108.182	16.1765	41.4279	22.8575	32.7084
Capana00g004067	7.29349	10.6798	16.2444	12.6093	18.4381	22.8759	16.8961	24.8623
Capana00g004073	14.6318	11.5989	14.3589	10.724	3.64897	1.70344	0.731405	3.09679
Capana00g004088	0.871785	0.0437283	2.53217	0.131489	0.223091	0.219571	0.824792	0.224426
Capana00g004089	19.8266	12.8299	17.0144	14.4383	6.67725	7.58882	12.7633	6.51709
Capana00g004092	0.033079	0	1.38062	0	0.085093	0.040074	1.69766	0.219969
Capana00g004093	3.26574	3.1252	3.90919	1.98627	4.88128	3.2202	2.36969	2.16434
Capana00g004100	7.26853	20.0191	45.543	22.7013	10.5483	18.189	13.6332	11.8014
Capana00g004102	40.0848	30.3672	25.4174	47.6795	24.0618	34.8375	23.5239	24.9503
Capana00g004111	18.1271	18.5737	11.5271	0	19.528	12.3074	20.8575	0.916705
Capana00g004113	22.5197	14.9879	13.8636	29.7363	9.58843	11.0647	14.4192	10.214
Capana00g004116	0.0149683	0.368954	1.41266	0	0.091966	0.731251	0.37576	0
Capana00g004133	28.592	5.37708	0.69351	0.0801793	7.29682	1.68329	0.648831	0.343521
Capana00g004138	15.9028	11.174	8.62135	4.88269	9.84125	6.46401	9.24489	5.35054
Capana00g004141	2.38935	2.50586	3.8915	1.78919	5.65022	4.61813	4.45775	6.57149
Capana00g004143	16.6263	11.0483	12.9551	6.12778	22.7024	39.0828	13.1515	8.53859
Capana00g004144	0.849302	1.26671	0.722915	0.332738	3.77518	7.30126	7.72896	2.11653
Capana00g004145	1.52203	2.33134	1.7788	0.137424	3.14757	4.94651	5.37362	1.86041
Capana00g004152	34.421	14.9342	2.15176	0.0149173	55.4471	49.0113	37.2151	3.21998
Capana00g004155	4.84061	0.19413	0.0671453	0.0104973	0.153722	0.0985633	0.0234305	0
Capana00g004157	4.27995	5.9978	5.14563	3.29819	9.36245	4.11323	8.34508	6.16676
Capana00g004158	50.0156	80.9866	48.2051	10.1436	24.0635	23.5438	47.213	14.6477
Capana00g004159	10.0276	8.38751	5.59101	1.10447	3.55819	3.61798	4.9246	4.22474
Capana00g004160	6.18665	6.92555	6.82749	3.22547	5.08417	8.63491	5.43758	14.8785
Capana00g004165	4.44933	9.62233	7.28366	6.4931	0.824661	1.06547	0.754714	0.983274
Capana00g004167	4.35801	6.01027	4.02661	6.39356	1.25381	1.68736	0.883485	1.19588
Capana00g004168	2.71477	10.5847	23.0819	22.4792	7.35226	9.99273	9.79304	15.9447
Capana00g004182	2.32766	1.83347	2.91079	1.73252	1.33959	1.49167	1.35152	1.46652
Capana00g004184	64.1108	99.8912	102.708	70.5738	116.661	110.235	89.7052	66.7884
Capana00g004188	0	0	0	1.18938	1.46786	0.280605	0.128625	3.70563
Capana00g004189	8.13995	4.43949	3.42415	3.3916	1.79276	2.42758	1.63027	2.81521
Capana00g004191	259.635	82.684	19.9797	6.72793	145.007	75.4314	44.637	21.6407
Capana00g004194	20.2759	18.3903	22.4954	38.2908	23.0511	42.1577	27.9117	20.7465
Capana00g004198	9.54679	15.3648	7.68799	30.5726	4.25478	10.5602	6.17325	17.4727
Capana00g004203	11.4277	3.68545	0.956673	0.107248	1.66076	2.24013	2.19957	2.75466
Capana00g004209	8.44679	9.69465	10.9255	1.1175	4.47847	6.62927	7.21002	2.97528
Capana00g004214	0.874422	0.520951	2.90713	0	6.89962	14.1139	4.22131	0
Capana00g004217	9.04952	3.55413	4.18583	1.36076	8.13755	13.6143	6.73739	3.18449
Capana00g004219	0.298108	0.0305467	0.287255	0.0849483	0.714031	0.497328	0.91899	0.289738
Capana00g004241	2.05795	1.01545	0.634523	0.0173267	0.0616885	0.14019	0.108746	0
Capana00g004245	7.3322	6.4536	9.35045	12.0657	9.24974	9.40688	5.74643	3.67757
Capana00g004257	7.01384	8.82402	5.72875	0.284407	5.83346	9.726	10.3771	2.29754
Capana00g004263	0.396765	0.827765	1.07653	1.74977	1.74806	1.76488	1.26874	1.42151
Capana00g004264	1.19576	0.250248	4.45679	0.078413	0.30421	0.57378	1.50624	0.612361
Capana00g004276	0.369782	0.0610333	0.111795	0.0190347	1.6298	1.26969	0.496142	0.272604
Capana00g004286	3.10263	2.83695	3.22693	2.80492	1.61695	1.9991	1.67011	1.95226
Capana00g004287	7.6551	8.55019	5.86959	12.5225	8.85215	10.7748	10.7421	17.1531
Capana00g004290	9.00719	15.6986	17.2219	33.0218	30.7058	21.3619	17.9545	21.4841
Capana00g004294	12.0106	1.79184	1.16142	0	0.999622	1.21562	0.641336	0.0160783
Capana00g004295	23.8546	38.8625	48.6519	22.812	59.7972	59.6825	68.0676	90.4573
Capana00g004305	31.0443	10.8958	6.85773	0.0861377	4.58763	17.1864	2.51349	0.773743
Capana00g004312	18.9263	28.4938	14.5691	0.787538	10.296	13.3426	7.00212	0.497664
Capana00g004317	3.28065	0.762033	0.870901	0.523634	0.519894	0.274883	0.864637	0.357602
Capana00g004368	10.0957	29.7603	31.4611	29.5323	37.3749	80.8618	19.9571	55.3379
Capana00g004369	7.48976	13.0079	8.38749	12.2968	28.4159	16.4826	29.0757	19.0236
Capana00g004374	143.396	95.9771	41.2812	26.5935	170.097	26.3382	33.8172	74.5968
Capana00g004377	4.91151	5.38488	5.94262	7.62116	2.6442	3.36042	5.04804	3.63627
Capana00g004382	0.0754037	0.0319023	1.09577	0	0.272074	0.027133	1.73754	0.0384233
Capana00g004394	7.71012	7.104	7.32171	8.41821	1.4299	2.1205	3.16291	3.81455
Capana00g004414	6.89164	14.1824	18.305	4.83744	0	0	0.0028505	0.0603827
Capana00g004415	1.03183	0.606397	1.38501	0.181271	0.005416	0	0.001227	0.0299403
Capana00g004435	39.2994	48.4749	101.434	43.3339	155.701	181.388	42.1875	187.987
Capana00g004438	31.4369	34.3759	69.1184	84.5388	74.4096	77.3522	85.065	139.293
Capana00g004439	1.2581	0.277503	1.47068	1.60101	0.771126	1.86545	1.69401	5.59572
Capana00g004443	10.7596	22.4756	17.1285	18.4438	17.7815	21.3443	15.2844	17.5537
Capana00g004456	2.63599	6.75629	6.84463	5.09315	6.93494	7.19825	7.39168	5.43843
Capana00g004460	27.4165	60.4706	24.3249	88.792	49.0508	33.767	88.2466	29.8385
Capana00g004461	0.152305	0.0894473	2.34989	0	4.47772	9.267	4.41852	0.0699337
Capana00g004462	0	0	0	12.068	4.10754	7.71971	2.85537	0.306289
Capana00g004463	15.0005	6.51601	3.9515	1.93007	2.06668	2.88917	2.2758	0.770082
Capana00g004466	0.126886	0.109156	0.802273	2.10327	0.008713	0.0251877	0.909776	0.572161
Capana00g004468	91.5186	12.6885	21.28	2.02592	10.4381	9.02714	9.11823	8.09452
Capana00g004470	40.5075	18.8803	13.333	38.674	7.52133	20.7656	19.5662	19.725
Capana00g004471	0.339614	0.027251	2.95282	0	0.037115	0.0390453	1.08724	0.310261
Capana00g004475	26.2976	11.6022	30.3141	1.13425	6.82182	22.3565	15.4	7.77412
Capana00g004483	2.40123	3.17311	2.94616	2.90806	0	0	0.0518225	0
Capana00g004488	11.3573	9.42101	9.29626	8.74743	7.85082	8.49197	10.9644	9.77701
Capana00g004489	0.230677	0.828734	2.37053	0.258393	0.554609	0.33702	0.778614	0.062322
Capana00g004497	8.52455	7.93825	7.4053	4.79802	0	0	0	0.225879
Capana00g004500	0	0.0117377	0.046642	0	0	0	0.03565	1.80683
Capana00g004508	0.433144	0.180357	1.04183	9.06041	0.760328	7.76375	0.8529	4.19424
Capana00g004514	4.20564	13.5329	25.8148	59.2689	40.7496	30.324	26.5731	113.51
Capana00g004525	5.48415	5.83421	9.73564	6.08708	8.48944	12.5485	10.643	9.80266
Capana00g004529	0.017752	0	0	0.025445	3.61492	4.66382	4.29838	1.8527
Capana00g004530	1.91164	3.72496	4.23276	0.912723	0	0	0.0409405	0
Capana00g004545	6.54627	12.1934	14.6686	21.018	29.5351	43.1495	19.646	68.2076
Capana00g004557	2.62766	2.8971	2.87701	1.54549	0.09886	0.147847	0.034716	0.0264823
Capana00g004560	145.802	90.5668	170.537	149.531	274.815	190.602	226.619	65.3133
Capana00g004561	1.23728	3.21015	1.32889	7.57819	6.17328	5.08749	3.08555	17.1773
Capana00g004573	35.6835	28.8682	12.9843	12.7715	14.8454	6.73871	3.56874	14.7067
Capana00g004582	7.40538	9.70445	6.02898	6.44983	3.13321	3.45586	4.73139	3.5301
Capana00g004583	199.212	156.219	98.1195	213.765	249.302	207.656	253.472	182.499
Capana00g004584	11.5672	18.7647	15.3086	3.89033	4.17437	4.15805	10.7792	4.65033
Capana00g004585	1.52953	1.79551	4.17273	0.228461	1.3356	1.10044	7.60512	6.0696
Capana00g004587	0.109275	3.24686	8.78005	12.6999	4.57162	7.81138	5.98065	16.7747
Capana00g004591	29.2367	23.1716	12.4719	1.76082	25.7264	13.2949	23.6937	8.36548
Capana00g004593	9.55244	13.0214	25.6466	73.0706	14.7349	17.3854	24.1198	33.2519
Capana00g004601	5.64324	1.55009	1.67216	1.32637	0.822254	1.75007	1.13844	1.03739
Capana00g004604	0.849196	2.74452	5.36925	11.9392	1.54742	3.53955	1.02741	2.34762
Capana00g004617	0.582012	1.15763	0.609713	0.0540403	0.0509925	0.0817363	0.145065	0.074573
Capana00g004619	34.7188	19.7491	2.21922	0	1.42447	4.3884	2.09987	0.0464927
Capana00g004627	21.8366	8.07074	6.2177	1.50726	3.0719	3.62506	1.93705	1.66331
Capana00g004637	1.54982	0.058787	1.68477	0	0.560177	1.73097	1.46527	0.0212467
Capana00g004642	0.231797	0.124208	0.195651	0.411872	0	0	0.030278	0
Capana00g004646	2.87299	3.42527	4.32709	3.11911	6.62786	6.34989	11.1941	5.42852
Capana00g004647	0.234382	0.250146	0.241499	0.126566	2.69659	4.22797	3.85821	3.87254
Capana00g004654	0.160402	0	0.173886	0	1.2551	0.822613	0.519089	1.25148
Capana00g004655	36.3373	70.1573	17.2304	0.367417	344.019	240.998	32.7384	34.8724
Capana00g004656	9.40468	2.08831	1.21918	0.939815	2.99938	2.15565	0.962104	0.360409
Capana00g004660	17.6098	10.2928	37.5314	39.8116	16.5208	22.3845	11.6806	26.0484
Capana00g004661	9.89366	5.10886	9.34499	7.01916	3.49616	5.2406	3.06168	4.42715
Capana00g004664	3.25335	5.61702	3.39227	6.61653	9.09319	12.9052	5.54486	4.15001
Capana00g004668	5.08336	5.6483	7.36884	8.94195	2.93779	5.69072	5.41002	3.89246
Capana00g004673	86.433	265.196	334.971	180.461	251.307	219.661	198.051	233.726
Capana00g004674	0.00541133	0.00636733	0.00323633	0.243651	0.0849145	0.218143	0.73389	9.53725
Capana00g004675	0.885211	1.53137	2.00102	4.17301	2.51512	2.55953	3.77994	3.65313
Capana00g004677	8.26907	6.03964	6.14548	5.60498	8.63325	8.22929	12.269	9.17956
Capana00g004679	14.4146	16.9632	5.9636	11.5931	11.6394	13.9425	10.6229	3.69051
Capana00g004684	9.89154	6.53743	6.00378	4.05232	3.77577	5.05591	5.69136	5.36244
Capana00g004694	1.53145	0.829975	3.90722	6.61045	4.19946	2.536	2.39832	7.30081
Capana00g004701	18.4768	9.65447	4.80367	2.83578	5.11313	3.86976	2.90866	4.2772
Capana00g004702	13.6111	7.98231	5.94643	0.309039	2.56462	2.05759	2.51901	1.25677
Capana00g004707	5.47883	5.0007	6.3762	1.25167	4.17216	3.55482	2.63437	2.65523
Capana00g004709	23.0239	36.8004	71.1787	179.334	69.7636	41.1133	16.6704	247.634
Capana00g004714	0.0803073	0.0235997	0.186314	0	0.654537	0.218346	0.119967	0.293987
Capana00g004719	28.4689	31.1182	15.8396	20.299	9.74775	12.1448	13.2701	9.43487
Capana00g004724	63.3914	31.6837	59.6461	15.9349	58.8609	66.9804	103.662	11.4575
Capana00g004735	10.9621	10.3104	16.109	21.0645	9.93756	27.7569	15.6689	19.1085
Capana00g004736	4.78208	0.153098	5.99651	0.138369	0.965967	1.45113	24.6908	0.766246
Capana00g004740	3.23947	2.35618	2.44489	1.94134	0.911342	1.32761	2.23369	1.08597
Capana00g004743	0.106491	0.099835	0.202382	0.234023	0.006539	0	0.049213	0.0252733
Capana00g004745	2.65319	1.71571	1.86324	4.7665	0.699376	2.14806	2.19772	15.0246
Capana00g004748	22.992	24.8791	65.493	12.6117	11.6333	21.1674	18.38	0.762221
Capana00g004763	1.20564	0.264193	0.209953	0	0.0904515	0.30967	0.202928	0.0180963
Capana00g004767	35.3891	40.1008	49.437	28.9927	40.4253	74.4447	34.1605	61.4509
Capana00g004781	42.1458	86.5526	71.7353	183.272	96.5537	336.675	62.6789	101.243
Capana00g004783	103.888	240.395	186.161	184.299	110.918	122.537	103.934	91.7939
Capana00g004794	0.093167	0.100597	0.060117	0.0522543	0.321669	0.461669	0.197367	0.428435
Capana00g004804	0.399389	0.243804	0.700058	0.351093	0.071953	0.593254	0.125348	0.439973
Capana00g004807	2.1941	1.5962	3.4815	1.96985	0.85075	2.81508	1.09847	3.22851
Capana00g004812	87.7611	20.117	0.22474	0	18.3916	9.89776	1.69125	0
Capana00g004815	9.86721	10.4202	18.9858	12.2178	5.90095	6.87919	6.51542	6.30934
Capana00g004816	0.116925	0.176959	0.115981	0	15.0546	11.1582	3.56601	3.81354
Capana00g004818	0	0	0	0	0.684979	0.393712	0.25637	0.368003
Capana00g004820	73.5508	60.4598	33.7686	0	22.8354	27.0684	32.6504	0.324112
Capana00g004823	20.9228	30.8518	26.7408	35.6069	48.5889	29.4016	52.8727	48.4354
Capana00g004825	78.7436	155.728	65.9994	127.971	20.2227	57.9668	12.6074	5.37354
Capana00g004827	1.25282	0.42078	0.36784	0	2.22657	1.13173	1.04402	0.27487
Capana00g004831	0.313033	1.19375	60.8072	1.77982	15.1301	6.08847	328.473	36.1176
Capana00g004834	13.5129	6.65431	10.8049	3.8501	4.14834	12.0704	3.89446	2.99502
Capana00g004847	31.4366	16.0694	20.0612	8.52302	5.02272	8.39813	3.77209	3.31391
Capana00g004850	1.84159	1.5296	2.59306	0.732287	0.046053	0.043116	0.128319	0.0308887
Capana00g004859	0.664675	0.821806	0.953198	0.151466	1.86201	3.88979	1.42347	2.29349
Capana00g004874	3.44778	2.80406	1.82444	3.38264	7.4377	15.9191	6.13787	10.247
Capana00g004881	0	0	0	0	3.62913	3.91889	4.04953	2.25848
Capana00g004882	14.2389	3.53786	2.21883	0.715771	1.62283	2.84093	1.02531	0.677318
Capana00g004890	2.97906	5.26635	6.20891	4.56537	9.11177	8.81769	10.9388	11.1182
Capana00g004895	2.15947	0.472533	2.45667	0.444467	1.16552	1.46069	2.72818	1.74314
Capana00g004900	0.0248967	0.696397	0.309932	0.667372	0.101655	0.496186	0.204991	0.030152
Capana00g004901	2.49675	4.23812	1.51293	0.195026	0.541689	0.60187	1.07698	0.592935
Capana00g004903	6.51559	1.29682	2.60651	0.221035	0.328959	0.608692	1.63247	0.109064
Capana00g004904	16.6843	1.42418	3.60188	1.9932	0.430336	0.402844	2.21452	0.494173
Capana00g004909	6.45181	6.54486	4.97442	1.68596	9.36525	11.4855	7.75859	5.96442
Capana00g004912	4.29027	5.32934	6.88603	2.06049	2.01434	3.35022	2.60837	3.38375
Capana00g004915	58.4952	48.5435	10.1397	0.409824	8.96665	6.00024	3.2645	1.26983
Capana00g004916	38.9616	47.2427	40.624	63.9575	37.8837	42.5785	29.8598	26.3429
Capana00g004918	0.622955	0.200393	0.17671	0.116276	0.561166	0.776388	0.332549	0.858127
Capana00g004921	0.003621	0.006267	0.030544	0.930928	1.59652	0.347654	0.285228	3.75702
Capana00g004922	0.032955	0.00618667	0.0439667	0.12881	0.017315	0.575339	0.0880165	0.356224
Capana00g004925	0.28639	0.286475	0.113456	2.11671	0.079144	0.654727	0.169455	0.703967
Capana00g004929	0.676002	0.113962	0.0941823	0.113326	0.17798	0.13777	0.155311	0.0694637
Capana00g004937	0.0803977	0.010174	0.020249	4.36524	4.75213	0.216291	0.346812	21.243
Capana00g004947	121.103	253.261	260.316	418.958	202.354	200.464	190.595	192.648
Capana00g004967	21.3338	9.13985	2.90864	0.91821	2.3821	4.69616	10.5096	0.724192
Capana00g004972	37.887	33.1927	20.3262	27.3581	18.4031	16.3416	32.9627	20.4764
Capana00g004976	0.840319	0.209453	4.39917	3.18309	0.141873	0.491207	1.2975	3.35419
Capana00g004977	5.55312	6.76579	2.01788	1.83942	10.9061	4.02496	2.18654	2.45235
Capana00g004979	182.318	124.956	131.395	134.417	87.4452	119.309	78.7229	70.6916
Capana00g004988	2.20671	7.29681	9.06064	0.577718	5.01817	4.64818	3.77407	6.3026
Capana00g004993	21.2026	61.2854	27.9717	1.69853	13.9475	10.6038	12.9509	13.5566
Capana00g004995	1.91228	2.2075	1.29356	0.505131	0.718041	0.577696	0.525849	0.22871
Capana00g005006	26.7063	38.7073	47.8951	36.204	52.1241	51.6782	30.3511	43.7946
Capana00g005021	2.80703	11.4284	11.3607	9.67552	14.5647	12.3691	10.006	11.3643
Capana00g005028	4.62058	1.1692	1.69802	0.69318	1.28131	0.622582	1.4824	0.742037
Capana00g005030	0	0	1.29781	0.796131	0.309939	0.086975	0	0
Capana00g005036	63.4138	68.6552	87.7215	86.6727	156.458	102.875	59.3361	75.546
Capana00g005037	1.72239	0.773726	0.687382	3.08378	2.58549	1.24073	1.04179	1.74129
Capana00g005044	1.57251	0.0646883	0	0	0.0791755	0.0294843	0	0
Capana00g005055	2.42061	1.18663	1.08466	0.753003	0.325347	0.914466	1.18869	0.308291
Capana00g005057	8.67735	6.73344	5.65968	2.29782	0.336581	0.372777	1.15699	0.383567
Capana00g005070	3.28874	1.09655	1.15975	0.785915	0.393114	0.414518	1.10547	0.378038
Capana00g005089	384.88	996.143	793.422	528.046	728.25	831.699	609.46	408.289
Capana00g005101	51.1611	55.1108	51.6612	35.3176	25.8072	36.6439	25.7597	12.805
Capana00g005103	4.19031	8.66094	6.52665	3.50189	4.44964	4.27764	5.57387	4.1687
Capana01g000005	13.465	42.8976	63.7679	466.298	27.5718	54.6974	33.508	145.693
Capana01g000006	12.0181	12.2539	17.3754	11.4489	17.7861	19.0231	24.3826	51.0049
Capana01g000009	21.9858	5.39499	9.07842	7.60283	4.39069	6.09376	7.90096	6.24421
Capana01g000010	26.0134	47.2856	47.2398	7.72371	272.126	67.9803	145.506	45.0891
Capana01g000015	17.7817	2.29257	1.70284	0.0468093	0.636233	0.79269	1.36614	0.249833
Capana01g000018	2.28822	1.96067	1.56068	5.44469	0.332463	1.68793	0.172051	0.903944
Capana01g000019	1.92967	1.28129	2.72641	17.4535	0.366389	0.680722	0.667492	5.84793
Capana01g000020	161.911	289.792	283.546	311.652	127.827	198.173	193.996	142.841
Capana01g000033	0	0	0	0	0.098248	0.140321	0	0
Capana01g000035	2.74435	0.0718857	1.04201	2.01477	0.275025	0.219446	0.475355	0.540799
Capana01g000037	13.3054	15.9492	14.6034	15.0856	21.7059	18.9106	14.1132	12.243
Capana01g000038	5.23277	1.27488	1.64031	0	0.711749	0.273769	7.02998	0
Capana01g000039	0.861178	0.803022	2.76275	0.394267	5.16905	5.31043	8.52482	8.11321
Capana01g000040	6.26251	0.402288	0.157088	0	0.324457	0.955391	0.051039	0
Capana01g000041	0.427249	0.162346	0.744158	0	0.423673	0.542493	1.36595	0.25556
Capana01g000044	21.375	25.0034	4.22282	0	3.71069	0.451406	2.76218	0.0624317
Capana01g000046	0.309159	1.84788	4.28875	0.252409	24.3311	2.86139	0.381848	0.39701
Capana01g000048	711.529	106.501	16.7078	0.135392	137.136	44.8136	34.2414	7.08015
Capana01g000049	15.4298	7.27528	6.51056	6.40464	2.3743	3.7355	3.11416	2.99692
Capana01g000052	47.306	30.3235	32.9168	36.7203	13.9454	17.8099	21.9524	22.1721
Capana01g000053	6.43877	14.8146	12.6155	0.514825	29.5857	36.9349	6.03177	4.56007
Capana01g000061	4.90432	3.31994	3.20651	3.26679	1.33809	0.884575	0.75088	1.82833
Capana01g000066	3.89073	2.63259	2.58025	0.199227	0.689774	1.23303	1.81975	0.512651
Capana01g000069	8.86434	16.0555	5.75375	2.64463	7.81853	8.24619	5.745	5.46303
Capana01g000072	1.69765	1.36693	1.16619	0.177676	15.1304	5.84071	4.71408	1.72294
Capana01g000073	0.839323	2.86742	5.86898	10.5549	4.09824	8.42578	6.42222	12.5375
Capana01g000074	0.578813	7.10221	9.09695	5.9136	10.5596	12.9011	8.92789	5.78789
Capana01g000076	18.834	11.9622	9.79741	6.63159	7.30848	7.57138	14.0621	7.56333
Capana01g000078	56.3256	47.1289	17.8865	15.7838	78.3402	17.9608	90.1909	22.0118
Capana01g000079	15.4197	13.8106	15.8448	1.58074	9.96644	10.482	9.52635	3.38374
Capana01g000083	1.39086	4.24006	5.90032	2.3237	4.96361	5.07499	4.01314	5.288
Capana01g000088	83.9738	43.0606	46.555	58.5186	22.493	35.0124	25.412	50.538
Capana01g000094	0.739564	1.29682	0.749076	0.847103	0.381084	0.296657	0.595649	0.901061
Capana01g000097	12.6463	5.72529	6.93852	2.81424	6.87827	7.0858	5.97122	9.72489
Capana01g000101	4.79575	2.34027	1.46095	0.0641947	2.19997	2.45875	0.835728	0.720075
Capana01g000105	2.02779	0.811067	0.769214	0.152401	0.600703	0.960747	0.61824	0.540118
Capana01g000107	0.620865	0.514485	0.109061	0.00878767	2.78918	2.16035	3.93161	0.800119
Capana01g000108	0.765585	0.314295	0.0159007	0	2.33056	2.53358	4.08142	0.105968
Capana01g000109	7.53716	5.63165	35.1399	0	3.36776	4.08507	53.6246	0.981705
Capana01g000111	0.0865727	0.0235447	0.318259	0.059191	7.89666	36.0502	1.22746	0.0836723
Capana01g000112	0.0234477	0.057192	0.181799	0.0766243	1.52163	1.07547	0.844502	0.247548
Capana01g000113	4.53135	2.41237	0.969265	1.84749	1.33661	3.55817	0.557951	0.142601
Capana01g000118	25.2383	36.329	41.8289	25.4684	61.5208	36.6953	27.927	16.412
Capana01g000120	5.46072	5.20606	4.18114	2.69959	4.54313	5.85243	8.72614	3.64825
Capana01g000129	5.77435	0.0895873	0.0105673	0.0162557	0.265458	0.0689367	0.320756	0.111563
Capana01g000132	30.5451	28.3484	35.4045	21.9772	63.0795	106.921	53.6135	88.8051
Capana01g000138	6.80332	1.28349	4.55207	0.016322	3.9467	2.73312	3.4191	0.446652
Capana01g000141	6.51694	1.10304	4.08783	0	1.19705	4.73586	3.49156	0.0555083
Capana01g000150	2.24394	0.0157817	0.943275	0.044192	0.230164	0.385215	0.762227	0.424726
Capana01g000152	6.18024	4.29508	5.34345	1.64281	1.97663	3.43397	2.69631	2.3424
Capana01g000154	0.392832	0.116665	5.9776	0	1.76267	2.3731	1.87057	0.703393
Capana01g000155	16.4429	18.3625	28.2474	24.9547	29.4989	26.7404	26.0811	34.5482
Capana01g000157	11.7096	4.90184	6.41069	5.16592	2.8892	4.95053	4.43375	8.29585
Capana01g000166	0.883413	0.0657587	0.514405	1492.24	0.881855	1.5044	10.1726	1496.89
Capana01g000175	0.298712	1.78786	0.989089	29.1057	0.391725	3.43294	0.150962	1.25848
Capana01g000179	0.363267	0.808337	3.02335	0.500135	0.733631	2.83467	1.68726	1.23181
Capana01g000185	23.4357	18.291	24.2372	10.3192	9.40933	14.7593	11.7074	9.33324
Capana01g000189	0.644264	1.11733	0.340726	0.408412	3.93846	0.795819	1.85915	0.970461
Capana01g000190	1.24517	0.105448	0	0	0.0294525	0	0.0180475	0
Capana01g000192	21.6612	12.1406	11.651	4.61037	4.73639	5.34634	13.2028	4.19918
Capana01g000194	10.2407	30.0155	37.5024	6.15422	26.8524	37.999	19.1265	17.4
Capana01g000195	4.3579	4.9406	11.0717	1.69572	6.67506	6.29141	2.15595	0.999755
Capana01g000196	7.72973	5.44284	3.99415	3.032	3.40498	2.30729	3.69814	2.3862
Capana01g000198	0.343723	1.15642	0.105763	0	0	0	0	0
Capana01g000199	8.2758	2.9652	0.122144	0	0.756539	0.447159	0.0758865	0
Capana01g000203	66.2132	32.4344	19.2692	1.63664	29.6895	29.4559	20.8851	9.28194
Capana01g000206	16.7088	10.3974	11.8451	8.46143	6.41621	9.23316	8.57199	7.8375
Capana01g000217	27.4417	40.2519	42.2079	30.1684	46.5709	55.5716	69.1993	22.0598
Capana01g000219	35.8955	18.8563	13.4933	21.6324	10.0839	11.3169	8.58329	17.2082
Capana01g000220	14.4503	7.64806	9.56368	1.88009	1.49572	2.73385	1.28762	0.424558
Capana01g000221	52.7824	42.4362	67.4001	115.065	77.0595	97.9782	45.8756	106.554
Capana01g000222	3.66897	0.911431	1.04228	0.101239	0.090556	0.159633	0.325603	0.0489313
Capana01g000223	0.648291	0.198587	3.3339	7.01893	1.35279	1.25561	2.1987	22.4247
Capana01g000225	179.933	214.805	165.723	355.815	301.025	268.71	192.829	446.067
Capana01g000231	17.3446	3.11803	2.00832	1.25886	5.18318	3.93521	5.85341	12.9733
Capana01g000237	0.755037	0.0921493	0.74995	0	0.022297	0.070803	0.295967	0
Capana01g000246	5.91849	5.00403	7.94308	18.2382	6.08325	17.0775	6.87389	38.9689
Capana01g000248	122.475	278.262	38.1108	0.810749	53.9925	11.0967	8.21879	4.62874
Capana01g000249	9.41661	3.58145	7.16425	4.43506	10.6355	8.93047	14.2118	7.21995
Capana01g000250	679.678	417.369	234.102	165.108	772.248	401.144	267.542	543.536
Capana01g000252	3.9807	0.375849	1.53295	0.0492827	0.64037	0.547097	0.981286	0.144555
Capana01g000256	16.4912	9.32579	7.40841	1.91624	5.02423	7.02601	6.18756	1.78165
Capana01g000258	14.3575	6.77389	5.36201	1.72069	3.58941	4.30462	5.86608	5.58118
Capana01g000260	7.82731	7.27376	9.80823	13.1083	27.1656	16.9304	20.2359	14.5831
Capana01g000264	8.41148	4.07881	0.935764	0.00952333	0.924577	0.338416	1.13287	0.0382993
Capana01g000268	14.3932	3.02538	6.06847	0.678766	0.599465	0.868544	4.39582	0.415132
Capana01g000269	1.46605	0.881021	1.39463	4.19674	1.35881	1.08116	1.24372	0.452349
Capana01g000273	5.6221	6.42099	2.89563	44.7222	56.2639	60.5285	42.3495	32.1223
Capana01g000274	12.4595	14.9918	20.8774	31.4311	23.7959	20.9068	20.0875	28.0402
Capana01g000275	59.366	64.3663	95.8752	52.4548	34.9701	90.9458	30.273	44.6324
Capana01g000285	0.773548	0.110895	4.05676	104.55	0	0.248041	0.035158	4.57305
Capana01g000289	29.0831	16.1966	17.1162	23.3251	4.23428	7.70576	6.51971	12.5004
Capana01g000294	12.3398	6.43893	9.89351	3.94588	4.10878	5.56771	9.60357	3.98753
Capana01g000295	8.63674	2.28873	7.86878	0.321887	6.11015	5.15525	5.16236	2.56967
Capana01g000299	1.13806	0.102723	0	0	1.56659	2.06134	0.470656	0
Capana01g000308	6.85098	7.52546	10.2541	7.79171	6.10466	7.10485	7.99509	9.88382
Capana01g000321	1.10263	0.382279	0.197306	0.075811	0.391052	0.232963	0.054433	0.369681
Capana01g000326	99.8823	21.4085	6.55325	2.30749	6.8997	4.5031	1.43084	1.94886
Capana01g000343	1.31364	1.81377	1.00697	0.58367	1.03147	1.45756	1.7449	1.78763
Capana01g000344	2.99829	3.27658	1.73667	0.680351	1.30659	1.06299	3.01808	1.38701
Capana01g000348	19.6793	8.97277	10.8859	11.2991	6.46166	7.69416	10.6632	14.2238
Capana01g000349	74.4926	32.7329	1.82403	0.0136133	21.6624	1.82996	0.760197	0.292554
Capana01g000350	0.192647	0.232384	0.750735	3.89763	0.186186	0.235733	0.170847	0.604903
Capana01g000351	30.8717	22.1908	18.2046	13.2535	10.3832	10.123	24.3859	12.189
Capana01g000353	0.740417	0.843106	0.542351	3.7567	3.14191	3.3182	1.74552	1.56363
Capana01g000360	0.223655	0.0532713	1.00153	18.0369	0.216671	0.168269	0.340734	7.32172
Capana01g000361	33.0935	16.8446	6.92713	6.68343	8.76078	8.08662	5.91407	12.9675
Capana01g000364	42.3274	41.5029	44.9326	27.6429	97.172	58.9685	34.1196	36.4065
Capana01g000374	0	0.869346	2.45617	0	0	0.008153	0.156981	2.77459
Capana01g000383	11.5033	11.2918	23.537	12.2936	9.14608	8.78141	31.5872	44.4387
Capana01g000386	70.5756	74.2737	78.8279	95.5149	141.118	99.6843	108.873	152.198
Capana01g000387	14.4127	7.33414	8.16138	3.62575	3.07362	2.3676	4.88295	2.85903
Capana01g000397	11.9813	11.5399	5.74274	1.24098	17.2855	11.6253	10.1705	7.26736
Capana01g000399	51.7447	17.1644	10.9067	5.40579	7.37277	5.63341	9.8182	3.84381
Capana01g000401	1.39617	1.6233	2.68419	1.71228	1.15809	1.23674	1.11979	2.19666
Capana01g000402	15.1756	52.66	54.7935	29.9376	83.9896	100.661	46.949	24.1595
Capana01g000405	4.17929	2.92521	5.25145	5.07171	5.99602	8.04655	5.45412	6.75561
Capana01g000408	0.772106	0.394022	0.0484423	0.0360523	0.0952255	0.15965	0.068249	0.3646
Capana01g000410	68.0726	78.6638	83.3647	148.593	131.382	106.941	112.554	84.7823
Capana01g000411	11.0098	17.0362	9.43223	10.4564	19.5469	17.1692	27.107	13.9323
Capana01g000423	38.0192	33.7918	28.1787	84.8785	47.3657	74.5287	31.8971	107.482
Capana01g000426	12.6071	9.75074	3.43121	0.773699	5.25116	4.83482	7.21952	2.12384
Capana01g000432	2.07236	3.30781	3.29642	2.17634	1.84515	2.23099	1.97154	8.08202
Capana01g000441	5.15953	5.81715	0.981925	6.81282	2.44497	26.1127	2.73385	0.910272
Capana01g000455	47.1	17.0968	11.9084	4.22074	6.99651	4.36427	5.05801	3.85222
Capana01g000460	13.5045	28.1338	24.7684	47.1109	51.4081	23.9441	52.8752	31.3163
Capana01g000461	11.3938	4.99866	1.16731	0.038625	2.98549	2.82383	0.7163	0.336524
Capana01g000477	2.97359	4.3906	1.88641	2.61508	1.71227	5.022	2.57482	3.49629
Capana01g000485	3.55908	5.43538	5.30092	2.08238	27.1297	20.8597	13.9825	8.7356
Capana01g000487	4.31988	2.37669	1.77123	0.040355	10.7535	4.34448	1.21346	0.78095
Capana01g000491	1.89284	3.59382	7.3339	16.1582	5.21574	4.58135	1.93931	20.6859
Capana01g000494	0.32708	0.768316	0.310384	0	0.258265	0.0711557	0.0866965	0.397916
Capana01g000495	1.02218	0.151764	2.0051	0	4.77643	3.82871	2.4253	0.1522
Capana01g000498	39.3695	32.7627	60.0039	78.6188	67.4115	39.7985	45.4723	54.0596
Capana01g000499	159.717	45.3394	17.9413	38.8511	30.7965	14.1049	18.1112	93.0115
Capana01g000505	33.7309	53.6973	77.9596	78.2052	206.047	73.7493	74.498	81.5018
Capana01g000509	122.093	195.433	149.339	73.0068	326.265	166.863	394.533	156.374
Capana01g000510	1.05456	5.85675	116.537	0.657376	11.0335	5.82592	195.818	92.8173
Capana01g000516	36.2735	61.512	50.2855	134.656	54.3833	27.8964	21.845	18.9929
Capana01g000517	0.565005	0.470371	1.06216	0.316141	4.28996	6.48693	5.49881	11.8527
Capana01g000518	19.3062	10.3418	8.40204	0.320973	5.90826	5.10034	6.93351	0.448824
Capana01g000521	212.424	65.4404	49.0032	9.69957	7.69689	6.7439	30.6385	1.60113
Capana01g000522	12.8049	0.0355483	0.0231053	0.851772	0	0.0109927	0	9.68503
Capana01g000524	2.16746	0.12857	28.3241	0.059926	0.647694	0.200265	38.9831	4.57931
Capana01g000525	2.9772	0.711173	1.52368	0.119251	0.460286	0.268044	1.00687	0.256226
Capana01g000528	5.67866	0.0209943	0.21078	0	0.196329	0.0452997	0.511165	0
Capana01g000530	52.7522	9.19831	3.4265	1.4327	4.36781	3.49294	1.30612	12.3342
Capana01g000531	4.92972	0.0420217	0.291638	0	0.139194	0.270934	0.937231	0.0216097
Capana01g000534	23.0762	10.3182	3.30238	0.009643	28.3663	16.9888	7.81183	12.2047
Capana01g000538	12.1628	7.28945	2.98547	2.51427	6.67707	5.16856	9.16334	3.5546
Capana01g000540	16.4485	2.63196	4.85335	1.08807	4.90424	2.46385	4.0416	6.90953
Capana01g000547	3.20288	0.250148	11.7648	719.076	2.58999	1.97114	12.3502	22.9228
Capana01g000552	62.5691	11.3799	19.1387	3.69915	4.49343	5.38266	11.4249	8.74348
Capana01g000557	142.089	158.161	94.3307	102.623	45.7602	62.2065	57.8147	62.7501
Capana01g000559	77.7774	70.4189	72.4043	193.41	55.2496	67.3641	41.2706	102.587
Capana01g000561	17.4869	11.6562	18.1786	9.8046	5.38008	12.6046	6.60148	11.3792
Capana01g000562	1.447	5.13627	2.73883	5.5706	4.13028	4.58377	2.4949	4.38659
Capana01g000570	2.38171	12.3068	10.4584	4.24569	1.03214	1.44292	1.17568	2.39427
Capana01g000575	25.2769	62.662	17.044	23.6233	648.327	17.0749	411.845	38.5807
Capana01g000576	1.2129	0	0.013463	0	0.0196285	0.0306697	0	0
Capana01g000581	3.0876	3.84014	2.73268	3.95615	5.19371	9.36347	4.03727	3.69207
Capana01g000582	29.0251	0	0.184501	0	0	0	0.282498	0
Capana01g000586	12.0046	7.83385	7.92957	16.4705	1.7374	5.15605	3.35138	4.62119
Capana01g000587	6.17531	4.44102	5.28999	3.76411	2.2136	3.03255	2.31938	3.53101
Capana01g000596	1.40191	0.346483	0.206529	0	0.22333	0.31732	0.272702	0.837613
Capana01g000599	42.9418	35.2201	36.0166	46.5963	46.2995	45.3258	43.5089	122.863
Capana01g000602	0.180621	0.472132	0.0944433	8.60594	5.47444	1.7726	6.6216	374.694
Capana01g000603	4.29114	6.2553	9.954	3.97062	4.12502	5.90048	5.76577	25.4205
Capana01g000606	9.68069	9.21406	10.6209	6.32615	4.28136	4.15993	5.51105	5.45359
Capana01g000607	12.118	2.22556	1.88526	0.862468	3.76121	4.20976	2.29157	0.518362
Capana01g000610	8.25027	17.1225	11.621	57.3503	77.5333	75.0969	120.945	84.5342
Capana01g000611	6.21036	0.218098	0.652077	0.103647	0.529254	0.404763	1.69938	0.200617
Capana01g000614	0.724834	0.813702	1.31242	0.522741	0.354722	0.543437	0.231394	0.726521
Capana01g000615	12.1124	5.2534	9.25713	3.13639	3.46344	7.2112	3.89672	3.93343
Capana01g000644	0.802622	0.678469	1.98572	0.647103	15.3257	2.81486	2.48725	10.7669
Capana01g000650	0.741692	0.372866	21.0185	0.0503667	0.919824	2.27188	17.9792	0.359005
Capana01g000656	14.6057	12.3488	15.7057	16.6748	6.52009	9.50147	6.39694	12.3198
Capana01g000666	19.712	11.6983	0.566775	0.0203523	30.2239	6.41243	3.63675	0.883098
Capana01g000668	2.4137	3.81485	2.11135	16.1485	0.261323	0.53634	1.43067	14.9466
Capana01g000671	4.62462	6.81597	13.2828	5.07021	3.58325	6.80814	4.67927	7.44649
Capana01g000678	1.64075	5.93105	769.69	0.038568	40.4342	17.3216	1716.11	94.4948
Capana01g000680	1.52106	0.660393	1.85045	1.7484	3.14529	0.753308	2.45571	3.49824
Capana01g000691	0.750808	4.0127	8.25525	12.6361	6.29921	19.5456	4.29164	14.2073
Capana01g000694	100.072	70.6419	72.2904	101.319	93.947	57.5839	55.072	30.4546
Capana01g000696	5.5166	1.96095	0.913257	0.226942	0.29124	0.77081	0.672405	0.00907767
Capana01g000697	168.778	165.043	99.0758	272.422	346.366	249.213	451.542	184.743
Capana01g000704	16.0562	11.1641	6.60238	3.91828	3.12212	4.3623	14.9063	2.41404
Capana01g000705	5.00042	10.344	5.21472	4.21094	0.792988	0.537198	1.64073	1.0073
Capana01g000711	0.0414043	0	0.116429	0.0582017	1.63267	0.862421	24.268	1.40016
Capana01g000717	63.5292	72.7242	69.3581	126.887	90.5423	73.4038	80.9842	61.0018
Capana01g000725	10.3553	17.6068	11.435	7.46761	22.3385	15.6643	20.7397	8.69164
Capana01g000728	3.06318	2.89129	3.24986	2.07433	2.60469	3.1484	4.32329	4.68043
Capana01g000731	67.0768	7.18462	13.1311	0.868478	26.1834	88.9678	11.2171	8.16509
Capana01g000732	4.41753	14.3625	12.894	7.78626	21.1388	12.4922	8.95523	5.64851
Capana01g000742	0.404748	0.305952	0.0530283	0.0976517	0.0077075	0.504426	0.156573	0.119779
Capana01g000743	8.05868	9.32159	16.1156	2.82075	6.96609	17.3344	9.9019	6.07858
Capana01g000747	8.14138	3.98589	7.85814	3.07747	0.224301	3.34985	3.76406	0.235937
Capana01g000752	16.4582	54.2861	24.4318	20.1241	39.5992	31.8637	22.0819	26.4629
Capana01g000757	9.98379	10.3018	26.1239	0.482898	17.0281	30.0651	24.9385	2.84696
Capana01g000759	2.25361	0.210965	1.25514	2.47451	5.47071	8.53835	5.42517	5.31163
Capana01g000774	12.0083	6.06598	4.87916	0.415012	5.09059	4.40319	8.28137	3.86979
Capana01g000775	25.1751	12.6923	20.559	10.055	29.261	64.634	24.1146	16.0911
Capana01g000777	830.398	404.128	44.368	1.16376	28.2912	24.96	9.21619	0.634929
Capana01g000781	9.96288	8.80439	11.2226	14.4703	3.88651	4.48656	4.99505	5.99159
Capana01g000784	16.0359	9.83451	8.5853	57.9135	2.67996	3.93407	4.62941	39.2307
Capana01g000786	26.4271	40.4201	55.6252	5.50639	49.2778	93.3326	80.5302	16.154
Capana01g000791	26.4784	37.3231	61.8796	53.1792	54.3424	31.4956	16.281	91.9753
Capana01g000793	3.66939	2.66029	7.78344	2.66087	1.52752	25.7546	3.76746	1.75969
Capana01g000794	40.095	7.19691	5.23671	5.71487	1.29858	1.76292	2.60151	3.06764
Capana01g000795	14.0424	17.0379	13.5732	68.2527	10.3595	64.993	10.4628	37.031
Capana01g000797	1.01074	0.112596	0.138862	0.0218353	0.092439	0.0172667	0.025345	0
Capana01g000803	31.9817	17.1052	15.3851	19.783	11.0061	10.6802	12.6641	11.8584
Capana01g000806	6.59101	7.73534	5.5575	4.84493	6.01753	5.5316	10.5446	5.89581
Capana01g000809	34.1957	11.3693	53.2177	2.10821	25.852	34.709	22.8668	11.4334
Capana01g000815	3.46184	16.3088	13.6917	27.1015	15.6404	34.224	7.30043	2.85601
Capana01g000816	8.50998	10.3323	24.6249	41.9446	6.52109	7.40246	13.9321	11.5589
Capana01g000820	7.10335	5.31283	5.86023	11.0448	2.54771	3.12091	2.68999	8.79877
Capana01g000822	0.21419	0	11.7627	0	0.270139	0.277013	47.4699	0.847483
Capana01g000828	0.783371	0.065537	9.73025	0.0489093	2.15053	2.83821	20.7295	0.446704
Capana01g000831	1.72331	0	0.153475	0	0.133178	0	0	0
Capana01g000845	18.9849	19.7201	23.8336	66.8357	35.1623	23.408	22.8639	44.8575
Capana01g000858	10.8287	14.0213	12.7984	4.79282	7.48615	7.15532	5.0145	4.53248
Capana01g000859	2.74116	1.86316	2.84885	1.11845	1.62206	2.63564	1.80935	5.31018
Capana01g000864	9.06107	16.3213	16.9875	2.71372	6.45424	5.26643	5.31615	1.68159
Capana01g000869	0.522664	0.04935	0	0	0.075145	0.0591313	0	0
Capana01g000872	18.6092	7.90918	5.44378	5.01662	15.0762	19.7349	13.238	1.47448
Capana01g000873	5.2057	5.88105	3.90939	18.3926	2.06453	5.69882	3.60196	1.80729
Capana01g000880	0.0174307	1.33967	0.547952	5.28152	2.45637	2.80135	0.529474	3.83345
Capana01g000881	15.8249	25.7873	26.0129	9.57106	9.53986	17.6639	7.06684	6.65694
Capana01g000882	0.252462	0.798216	0.819118	2.68115	2.10222	2.95888	3.88937	11.0767
Capana01g000883	1.15996	0.850087	0.29199	0.012087	0.722798	0.875132	0.336269	0.524216
Capana01g000884	25.2646	1.94093	3.9846	0.0601307	3.18648	4.99074	4.18798	1.09184
Capana01g000887	3.27401	1.70214	3.35096	1.0443	11.6875	14.4622	6.72846	2.11549
Capana01g000888	7.90594	4.64775	4.91259	1.12598	22.7633	9.38969	6.27724	7.51995
Capana01g000893	33.2074	71.0109	156.162	327.3	556.087	210.158	165.26	129.343
Capana01g000913	3.60515	1.28921	0.567012	0.159917	0.477701	0.354906	0.391947	0.0268583
Capana01g000920	6.26947	3.94675	2.67017	0.254932	0.861112	0.848491	1.70348	0.328361
Capana01g000921	1.29102	0.41891	0.380667	0	0.1185	0.069148	0.152882	0
Capana01g000922	46.1504	142.448	17.6783	0.141932	14.9022	94.0099	7.24086	0.188458
Capana01g000923	33.5345	13.8896	8.63094	1.14163	1.80051	2.57399	3.9867	0.459885
Capana01g000933	15.2535	20.0767	16.1323	24.4176	5.41309	7.67551	3.2391	2.32548
Capana01g000934	69.8218	110.485	100.14	300.26	181.897	203.355	106.551	252.353
Capana01g000945	25.7781	19.7384	11.9342	7.75764	11.7893	9.62516	9.83583	7.7104
Capana01g000949	1.95733	4.22062	5.85779	3.77028	4.32781	4.1143	4.46679	4.06607
Capana01g000961	66.6726	149.312	143.106	87.6049	73.095	64.6163	82.4157	65.6146
Capana01g000966	11.5691	3.4599	1.74788	1.05157	2.52664	1.50248	2.45668	0.161263
Capana01g000973	1.65528	1.72752	1.55964	0.419244	0.693774	0.804028	0.619098	0.380429
Capana01g000984	1.70258	1.5231	18.3711	36.3715	1.55467	4.84517	3.72818	25.3106
Capana01g000987	7.95209	3.99124	10.5276	0.290884	7.09443	4.55044	17.0836	5.91522
Capana01g000994	0.26128	0.068838	0.00916533	0	0	0	0	0
Capana01g001005	9.381	1.92514	2.05041	0.52465	1.14842	2.61079	1.15021	0.590329
Capana01g001013	0.486493	2.74539	5.45297	4.18532	0.76309	4.13104	4.67749	15.5188
Capana01g001014	18.031	62.2351	68.4873	373.927	293.035	271.926	79.7255	238.784
Capana01g001017	98.7883	80.7669	121.171	38.2405	34.0532	98.4363	63.0826	30.7269
Capana01g001021	4.08569	4.70894	4.14798	3.79836	7.2745	7.76695	4.48664	3.1754
Capana01g001023	17.7923	23.9236	15.9402	16.1968	4.30563	5.34331	5.70838	6.59677
Capana01g001028	19.13	15.2405	21.6767	21.7666	26.2943	29.8206	22.6596	20.24
Capana01g001031	3.87498	2.77541	2.05339	0.0856917	1.70959	1.54293	0.858969	0.626487
Capana01g001033	11.808	12.0321	10.579	10.7902	16.7458	17.595	20.0374	17.6263
Capana01g001038	3.07166	2.1961	1.73262	1.72149	1.0851	1.15699	1.00514	1.02147
Capana01g001040	2.45322	2.76685	1.00937	0.602994	0.315222	0.592622	0.664726	0.52599
Capana01g001041	74.4836	99.4258	88.0221	91.3816	66.8153	64.0938	55.838	39.4165
Capana01g001042	3.70027	3.52935	3.03442	2.74539	0.035632	0.030081	0.070321	0.151295
Capana01g001066	39.2792	143.572	146.61	19.258	69.8254	110.011	39.3853	10.7218
Capana01g001076	62.8646	0.677193	2.62368	0	0.802615	0.017375	2.10148	0.117081
Capana01g001079	27.4421	25.4257	23.0935	60.3436	55.4122	30.903	32.587	21.0432
Capana01g001082	14.4096	90.7643	143.347	205.912	462.35	574.243	188.176	463.448
Capana01g001091	0	0	0	0	10.1849	10.9341	12.0844	7.5398
Capana01g001104	7.6214	1.06365	3.07201	0.654083	0.654082	1.07025	4.64732	1.45871
Capana01g001108	2.8722	0.0651973	0.047305	0.200724	3.06937	0.809568	0.757471	3.40662
Capana01g001110	5.02167	8.18414	11.3604	12.5476	1.96218	2.90211	3.37059	3.3525
Capana01g001112	10.9303	3.76991	3.0557	39.0002	0.860421	12.9453	2.00245	2.50746
Capana01g001115	13.629	11.1273	18.7507	23.5082	29.7324	20.0275	19.9706	19.7857
Capana01g001117	1.22534	0.946011	0.761619	1.4452	0.065698	0	0.046782	0
Capana01g001119	16.5911	22.759	28.5506	154.373	112.012	59.7235	68.447	75.3198
Capana01g001121	10.7657	1.22475	8.3525	5.31806	10.8954	8.83352	1.9632	11.7207
Capana01g001127	21.4979	268.5	58.6607	128.447	526.037	132.695	176.891	138.909
Capana01g001129	0.31143	0.166284	0.0578243	0.123978	2.36619	1.81137	0.765278	0.532776
Capana01g001131	4.34459	3.85584	16.5624	15.5745	8.37347	8.41365	3.206	5.16714
Capana01g001133	2.2249	1.52323	1.4488	1.62232	3.42188	3.42996	4.23334	3.14614
Capana01g001151	85.4094	28.9462	28.1282	9.95386	17.1685	16.7602	19.8735	10.9939
Capana01g001154	3.82608	4.04198	2.97917	0.719329	4.32314	3.62863	1.90915	4.57958
Capana01g001165	41.1824	38.7794	37.7303	25.3484	0.179351	0	0.61037	0.322859
Capana01g001182	1.74103	0.233976	4.47589	0	0.101685	0.213631	5.96027	1.06701
Capana01g001189	2.82832	5.30258	12.3798	24.0188	11.653	9.54872	6.84696	7.8431
Capana01g001201	26.0421	24.1585	32.3366	28.751	11.9456	14.9726	10.2839	19.8624
Capana01g001213	5.48403	6.20845	6.87782	9.36681	4.43274	4.11866	5.36072	3.68561
Capana01g001215	33.8409	15.1453	17.6547	5.13586	9.86627	10.4246	15.8361	5.32026
Capana01g001221	2.63411	1.99563	6.38287	1.16517	7.74841	5.96166	5.38491	6.69733
Capana01g001230	15.7495	9.47067	35.8693	34.1116	25.6116	27.4073	39.5966	43.1308
Capana01g001234	2.58756	2.87079	1.93531	2.03538	3.77545	3.11059	5.14085	3.51246
Capana01g001241	2.76426	4.48206	4.2498	3.62707	6.09851	4.23565	5.70238	3.60012
Capana01g001242	0.634559	1.93221	0.720899	0.580406	6.03409	3.18087	6.56186	4.22231
Capana01g001250	37.1333	40.6822	18.034	19.1164	7.90084	22.1378	7.30684	9.70682
Capana01g001278	21.2545	14.8527	9.76359	15.0771	3.83979	3.71569	3.81112	11.8326
Capana01g001279	0.738324	0	0	0	0.137371	0.0555877	0	0.0258063
Capana01g001280	6.36088	10.2866	19.3728	15.0356	15.2122	23.8045	34.8407	18.6837
Capana01g001288	2.18215	3.59087	5.47253	1.37849	0	0	0	0.015978
Capana01g001290	19.5426	10.9489	19.6558	13.2739	6.90607	16.2339	14.7237	11.0643
Capana01g001311	0.0742553	0.0228427	0	0	0.529216	1.56181	0.019026	0.060288
Capana01g001319	14.9252	9.75927	8.93003	9.78021	5.74232	7.73101	9.47087	10.849
Capana01g001320	6.83649	5.43583	4.88393	4.21453	2.71802	3.71243	6.04559	5.64601
Capana01g001327	40.0036	59.5578	80.7319	83.3128	66.14	66.2305	69.1784	153.534
Capana01g001328	4.1858	8.49295	8.86218	6.86603	13.518	13.8554	13.2306	17.3846
Capana01g001330	16.4535	18.7972	11.6758	4.56483	5.97012	5.3533	3.05458	4.1693
Capana01g001331	6.07837	5.6943	2.14364	2.58303	2.8834	3.51635	3.37027	3.08098
Capana01g001333	51.0137	42.1863	28.1164	26.4203	15.9314	17.4923	21.1035	16.0166
Capana01g001334	33.461	0.607573	1.4261	0.243944	13.1124	7.42693	3.04409	5.39968
Capana01g001340	7.63617	3.383	0.64814	0.229651	0.888602	0.877609	0.094766	0.00918467
Capana01g001347	0.208941	0.245978	9.23262	0.198098	5.22688	1.17767	25.5834	17.3627
Capana01g001350	3.316	1.28547	20.8503	0	2.20323	1.01107	40.6879	25.7238
Capana01g001351	4.58691	7.16649	16.9538	14.685	5.74444	18.8725	7.10032	10.9943
Capana01g001352	1.25947	6.20116	0.551953	0.10031	0.227314	1.17434	0.149989	0.226404
Capana01g001356	5.02294	6.30272	9.1428	6.37566	6.66047	10.6996	7.26298	10.7764
Capana01g001359	6.75827	5.50144	5.96997	0.19654	4.20519	8.08621	7.6972	1.83607
Capana01g001365	4.97771	4.32093	5.05102	5.24231	2.71673	2.72611	1.8269	3.02292
Capana01g001372	5.17301	1.54666	11.1318	2.89721	4.27525	5.06831	4.62661	7.2239
Capana01g001375	3.36408	4.49027	3.91893	4.60329	15.5044	7.92732	13.0007	15.8438
Capana01g001376	34.9045	64.6454	145.409	224.015	34.3124	38.1653	38.3672	123.904
Capana01g001377	0.568891	0.0791897	0.632505	0.00780833	1.65282	3.13324	2.11854	0.0135257
Capana01g001379	34.2842	5.73881	3.95307	0.182487	2.89696	2.9744	2.26538	0.459438
Capana01g001380	9.31505	17.3826	25.5784	30.216	20.293	20.6327	17.6904	20.1457
Capana01g001386	65.4248	146.867	74.9733	10.9338	438.159	165.839	212.133	30.343
Capana01g001387	16.0472	24.4405	32.1669	26.0213	40.8336	15.8281	38.0888	32.5424
Capana01g001395	5.53432	5.16858	5.38452	3.84586	1.85609	2.88981	1.6677	1.17887
Capana01g001399	14.7756	4.60365	2.61852	2.64778	1.27026	2.86784	1.80804	0.863674
Capana01g001400	9.13155	27.2307	37.3084	24.8257	24.2577	31.2479	25.2029	29.9578
Capana01g001401	37.565	36.423	6.25088	0.0541903	12.984	12.654	16.4238	0.439189
Capana01g001402	6.28809	2.03596	2.64266	0.938816	0.667228	1.30997	1.09	0.983357
Capana01g001407	1.53898	0.238035	18.6435	2.98936	1.74543	2.94459	16.336	1.02876
Capana01g001408	3.93189	4.77964	5.80015	1.66949	3.32313	3.49175	2.66779	1.74932
Capana01g001420	3.17715	2.72475	6.12245	4.4297	1.0691	0.592166	8.4988	4.12621
Capana01g001440	0.761304	1.01781	1.37079	0.899136	0.500666	0.836077	0.646321	0.490838
Capana01g001447	45.5976	5.54989	0.910364	0.0551943	0.813877	1.38977	0.128431	0.113795
Capana01g001464	6.92658	7.35334	15.4178	10.4076	3.04008	5.3921	5.69764	14.1676
Capana01g001467	2.77582	2.11309	6.10206	2.33129	5.29519	12.5669	7.14106	9.27083
Capana01g001469	29.5388	15.0032	9.95904	0.330597	9.30788	7.77202	1.8452	0.722497
Capana01g001470	5.15951	3.84002	6.17016	3.66978	1.53564	2.2597	1.34252	1.70929
Capana01g001472	12.0188	12.6949	11.3504	7.76243	5.7047	7.27715	4.81498	5.6828
Capana01g001480	15.8724	10.6803	8.12928	15.3189	8.73679	8.15137	6.07572	1.99945
Capana01g001481	0.867091	1.71961	1.59533	2.27919	0.037951	0.031343	0.029576	0.069936
Capana01g001483	0	0	0.0303427	0.0105343	0.32979	0.432999	0.799252	0.474223
Capana01g001485	0.375271	0.602989	0.937136	0.110885	0.156364	0.095392	0.0995075	0.068608
Capana01g001488	152.906	3.0591	0.363802	0	2.17518	1.48404	1.5185	0
Capana01g001489	134.689	3.80744	0.406856	0	3.51767	2.05448	4.73207	0.319856
Capana01g001493	153.293	269.025	141.906	132.086	332.485	328.729	300.604	142.898
Capana01g001495	67.671	21.6855	17.5207	1.59172	1.94984	7.56528	4.1149	1.50816
Capana01g001501	2.8636	6.66707	1.72648	3.78699	6.424	4.31589	2.55482	8.93274
Capana01g001505	5.11425	14.8788	28.4262	39.1282	13.0542	42.8764	26.9276	52.9435
Capana01g001509	5.74641	10.8217	10.4191	20.8781	8.74004	8.61479	3.83473	4.99248
Capana01g001516	70.5105	1.58849	1.5472	0	5.71721	0.818357	1.59088	0.599023
Capana01g001517	5.70352	5.75643	3.55035	1.90651	5.11791	4.99289	9.1458	7.28689
Capana01g001523	0.588446	0.530714	0.668426	0.545609	1.65951	1.33694	0.673068	0.545746
Capana01g001532	361.281	10.3196	1.40419	0.0297173	36.3806	24.6796	24.3355	3.32953
Capana01g001535	10.518	0	0	0	0.284061	0.052973	0.168466	0
Capana01g001537	0.366839	0.05516	0.193978	0.342453	0.054235	0.188409	0.264564	0.0928113
Capana01g001553	4.35678	0.225376	1.43509	0	8.83091	2.57943	1.27597	1.21194
Capana01g001554	0.05978	0	0.0381487	0	3.20131	11.7758	4.03902	2.30132
Capana01g001565	5.87823	11.2213	5.36765	8.66583	20.3968	8.46047	9.83796	6.87325
Capana01g001574	4.0855	2.89792	1.12141	0.0341617	1.13597	0.264773	0.150445	1.3507
Capana01g001575	1.12672	36.8715	2.79575	0.0310477	102.977	60.6148	49.6224	16.9225
Capana01g001577	263.429	99.511	3.81995	0	362.096	74.1005	57.1753	26.8497
Capana01g001581	1.69666	2.12876	2.50138	1.38587	3.46657	6.88855	3.46424	1.04691
Capana01g001587	41.7151	66.9775	73.7291	71.2365	32.0343	32.5717	32.0141	27.48
Capana01g001602	0.667316	0.209198	0.506514	0.236591	0.148652	0.21953	0.228762	0.116118
Capana01g001611	8.69058	7.61824	4.40929	3.44736	0.280715	0.888514	0.757397	0.455118
Capana01g001612	6.26777	6.63718	4.02302	5.25921	16.3734	8.32828	10.5775	12.7596
Capana01g001613	0.008642	0.0149623	0.0166003	0.176149	0.177736	0.0915437	0.244089	0.338518
Capana01g001628	85.5923	0.672224	0.192056	0	14.4926	13.6284	6.5812	0.538024
Capana01g001642	16.4193	14.2868	21.1298	15.1687	9.91673	16.2918	9.18346	16.9624
Capana01g001643	0.97968	0.176004	0.177983	0.129013	0.447259	0.207369	0.153394	1.15255
Capana01g001648	3.04689	6.03078	8.08175	3.03098	19.5865	7.60709	8.4989	3.35959
Capana01g001657	1.19691	7.78193	6.88638	13.7618	34.8165	2.98059	50.315	15.8841
Capana01g001661	20.3511	14.2132	11.4137	11.1286	7.64455	9.85104	8.49705	11.8819
Capana01g001663	15.6565	62.5319	87.4741	65.8889	19.2526	43.7667	17.2878	12.4373
Capana01g001670	0.54807	0.730726	17.4845	28.6449	4.4424	9.1014	4.43234	90.8353
Capana01g001673	24.8245	11.3558	9.0327	14.4781	0.422957	1.42009	0.660502	3.59011
Capana01g001676	5.2007	8.81246	9.22986	1.56194	5.53073	7.92749	5.69731	3.89577
Capana01g001678	6.89364	11.3877	8.63058	56.428	22.8191	57.2677	21.7013	15.9838
Capana01g001681	62.6613	27.8138	26.3105	3.40922	55.4742	20.3686	53.8883	14.9813
Capana01g001687	3.30197	0.719841	0.575546	0	0.069883	0.379199	1.15728	0
Capana01g001688	2.62735	5.86128	9.36838	0.123702	2.09753	4.85403	1.82101	0.0342697
Capana01g001689	4.78354	0.10716	0.46302	0	0.142847	0.088071	0	0
Capana01g001690	1.50911	1.31168	1.15897	0.227405	0.0813865	0.0376347	0.040358	1.14473
Capana01g001691	15.9301	9.73846	6.03593	1.9682	5.43904	7.59955	3.53724	4.46988
Capana01g001692	41.7219	48.3335	7.9311	9.01848	12.737	45.7253	80.9166	7.83165
Capana01g001696	6.58207	6.25147	8.66278	5.0064	5.62049	7.2311	8.63676	10.9044
Capana01g001697	3.06286	3.85503	0.72257	0.09978	2.8763	0.0220807	0.060668	0.97438
Capana01g001716	29.2713	63.808	125.466	140.593	122.322	103.513	78.6416	99.1701
Capana01g001718	13.7262	9.0107	5.47307	6.84494	2.65583	4.45599	3.64449	7.98064
Capana01g001723	2.15987	1.67766	2.57948	1.84513	2.36559	2.91613	2.93554	3.10602
Capana01g001724	0.872087	0.512125	2.28397	0.215527	2.62131	1.70769	4.57648	0.975183
Capana01g001725	0.725107	0.264533	0.435825	0.0508087	1.36671	0.914702	1.74285	0.400493
Capana01g001739	31.428	9.62255	6.9329	7.11415	2.41814	7.02168	6.36411	1.4978
Capana01g001745	0.019028	0.0100837	0.087952	0.301001	0.0159145	0.00693	0.0171585	0
Capana01g001756	10.4662	6.47767	5.25358	0.0992217	1.50781	1.65885	4.75584	0.987669
Capana01g001759	15.7894	4.79082	3.22175	1.43712	1.70852	1.23794	2.25543	2.1998
Capana01g001764	0.389566	0	2.00093	0	2.47318	8.96511	3.48621	4.08137
Capana01g001770	34.3511	45.5163	30.3022	45.8223	83.179	44.1173	42.7284	38.2359
Capana01g001798	7.99876	5.65116	5.87048	14.8638	3.78146	5.69607	2.99174	5.34372
Capana01g001807	284.524	540.507	439.082	292.256	617.047	574.421	437.631	443.2
Capana01g001808	5.91427	9.45104	14.2801	9.23308	13.9759	12.3031	20.6796	20.6572
Capana01g001817	4.97059	4.44107	4.99358	2.7624	4.63245	4.5762	3.19234	6.41955
Capana01g001821	18.7445	16.2771	30.6873	23.2192	32.909	30.7133	24.7407	19.6821
Capana01g001831	8.76119	10.7427	14.4973	7.10302	29.1738	18.3389	11.3063	6.28914
Capana01g001833	56.4992	101.994	112.235	79.9983	92.6575	108.092	89.2202	140.188
Capana01g001843	13.3974	23.3179	18.0351	7.76665	0.042973	0.119507	0.286706	0.0627937
Capana01g001848	4.76125	5.17352	2.09209	0	17.8444	10.1071	5.9671	0.53784
Capana01g001864	23.3993	8.21454	9.20597	4.82828	5.45637	6.83545	4.0021	2.87077
Capana01g001865	0.433685	0.912878	0.686603	14.9801	0.98189	1.07996	0.714778	3.31231
Capana01g001887	0.00632233	0.0461307	4.10099	0	0.197897	0.0491573	13.644	7.86038
Capana01g001914	5.73312	4.16868	3.36026	1.59465	0.857789	1.01226	1.1401	0.343374
Capana01g001926	0	0.00581533	10.7448	0.0629103	0.163231	0.149689	12.9849	39.7809
Capana01g001934	35.7839	32.4432	34.729	16.8041	3.39117	12.2938	15.1813	15.3733
Capana01g001937	6.97989	7.36873	6.61179	2.75879	1.39361	1.07277	1.47416	1.61773
Capana01g001941	1.82076	2.24488	1.95803	2.33353	3.63467	2.4958	8.34122	3.85037
Capana01g001945	31.7828	35.7677	40.1712	20.0919	53.6583	67.7168	37.6184	65.2675
Capana01g001955	6.89491	5.6617	6.49386	4.67153	0.035339	0.0558733	0.271703	0.152812
Capana01g001956	1.35844	3.42966	2.21007	2.6027	0	0.0154357	0.077437	0.0626313
Capana01g001963	6.14809	0.369815	2.44405	0.034824	0.216674	0.269399	2.25539	1.02229
Capana01g001964	19.5053	1.47513	5.54531	2.19307	2.01459	5.17718	0.580045	4.2669
Capana01g001975	1.31781	0.715441	0.44329	0.582096	0.266099	0.192957	0.166391	0.100236
Capana01g002013	16.129	3.68509	1.76846	0	0.655609	1.14707	1.25361	0.148276
Capana01g002020	5.53209	3.63934	4.13528	2.20339	0.854892	2.33386	1.21292	0.390855
Capana01g002023	6.48002	5.62812	2.10198	0.703423	1.41376	0.881391	5.0258	0.44727
Capana01g002025	210.983	276.634	262.361	441.277	800.961	358.287	734.956	371.266
Capana01g002043	27.8753	30.4551	33.9309	34.9223	48.1127	50.0667	31.093	38.7089
Capana01g002050	221.613	839.369	851.418	413.267	817.112	1083.09	548.617	752.101
Capana01g002051	53.1501	59.9944	87.2311	59.7296	86.8276	107.012	73.0859	129.257
Capana01g002053	6.57244	14.765	17.5045	11.9937	4.26962	5.54133	6.4611	6.82056
Capana01g002060	4.24849	3.09851	2.74221	1.37381	7.7045	7.48795	9.61776	5.5538
Capana01g002071	2.8467	4.54064	3.99942	3.61331	5.90094	6.22727	5.04142	5.52133
Capana01g002083	2.36883	6.36557	8.02169	7.28003	6.14385	6.3549	8.96314	6.94974
Capana01g002087	9.20934	5.53525	5.23965	5.67331	1.24272	1.84839	2.99305	1.99124
Capana01g002090	29.8157	13.5493	10.161	0.428213	2.30518	6.84893	1.66364	8.12786
Capana01g002094	0.562358	1.00975	1.42454	0.710718	0.561041	0.355464	0.611465	0.22205
Capana01g002095	7.37028	5.16592	5.73636	4.12782	2.34931	3.33181	3.51642	3.07648
Capana01g002097	42.9028	51.1602	71.3079	96.8237	19.6348	22.2227	19.5501	25.5558
Capana01g002103	148.179	619.665	810.594	458.132	357.597	414.017	456.311	483.634
Capana01g002104	5.01483	4.69906	5.38905	67.7211	2.54319	6.203	3.17185	10.0854
Capana01g002118	23.3977	20.754	21.3819	18.5703	9.86823	13.3234	17.7084	14.8686
Capana01g002127	0	0.00139567	0	0.00499667	0.569441	0.188299	0.426005	0.17318
Capana01g002131	12.2331	5.8829	3.15166	0.532116	2.70246	5.03087	6.50716	0.654363
Capana01g002133	17.063	32.9211	66.8973	88.1408	27.0361	40.8821	35.6475	43.4348
Capana01g002146	14.6663	11.8773	8.64671	8.58143	21.6713	15.6993	16.8275	12.4701
Capana01g002149	17.416	13.6399	18.6898	25.2815	9.55644	13.5172	5.95143	9.90984
Capana01g002190	21.1376	15.7327	15.1833	10.5633	8.22146	12.8558	5.58108	6.04963
Capana01g002193	13.7995	8.41568	14.015	12.378	9.93497	14.0816	6.62459	11.6539
Capana01g002194	16.0494	10.3778	9.98553	2.75223	5.11167	8.63851	9.85979	3.08898
Capana01g002205	2.33445	1.51733	1.09818	0.390727	0.211706	0.384345	0.166677	0.851994
Capana01g002213	3.72118	3.66859	4.22178	2.48376	2.21129	2.31391	3.21338	4.49735
Capana01g002222	7.50575	6.39952	7.19982	3.81334	3.76989	5.84053	2.54684	3.27035
Capana01g002228	1.23926	1.92568	2.74557	2.64823	2.00502	2.34698	2.38655	5.32312
Capana01g002230	3.90796	3.90981	6.65331	6.6941	22.6766	17.9476	17.7876	29.368
Capana01g002248	3.29625	3.36641	8.22721	4.22465	2.40431	3.28428	2.29743	4.19138
Capana01g002270	0.239001	1.31502	10.38	0.08762	2.11174	0.232119	1.89379	0.574069
Capana01g002297	0.505734	4.62975	38.7527	3.71037	43.6657	28.4365	85.8591	36.875
Capana01g002306	13.9936	24.3047	20.0658	6.93816	59.0701	40.0638	23.9708	32.2778
Capana01g002325	4.68306	6.43211	7.93403	2.37548	5.83237	7.57215	5.49986	3.17703
Capana01g002328	9.72157	4.12804	3.08237	0.988708	1.87891	3.21769	2.44078	2.09972
Capana01g002330	27.8016	36.2701	47.6292	44.2929	55.8468	59.8418	57.8747	50.4623
Capana01g002339	21.1422	25.2932	19.7267	193.672	7.32742	53.8759	9.41664	42.2138
Capana01g002345	7.29296	8.18526	6.882	43.687	9.38091	35.7309	10.461	13.9524
Capana01g002353	7.77417	9.9929	9.10484	9.94175	13.6526	11.6347	16.1743	17.1299
Capana01g002355	1.27234	1.32131	5.02546	56.7871	6.4919	15.1888	8.11128	31.6484
Capana01g002356	27.5785	37.1261	50.7958	16.7848	4.40981	7.45815	17.8975	5.65469
Capana01g002357	0.344437	0.214522	0.352381	0.303973	0.099859	0.172695	0.144106	0.198484
Capana01g002396	2.81917	0.571297	1.76737	0	0.468591	0.300606	3.0595	0.474632
Capana01g002397	84.9534	80.6738	81.8466	174.196	113.905	95.3978	82.8239	78.9049
Capana01g002403	0.714264	2.28596	4.57319	22.5225	0.941916	1.81163	1.01598	4.97268
Capana01g002409	8.74025	7.84785	5.68478	3.6861	10.0181	3.79315	5.19581	5.96112
Capana01g002413	6.50552	7.46991	4.7616	0.814716	4.32935	3.86484	3.57443	1.79675
Capana01g002430	20.8683	13.0124	12.8739	3.84055	53.4746	26.8748	30.2143	6.33361
Capana01g002433	9.42449	13.3527	10.7455	17.2613	33.8342	14.0194	18.92	18.0222
Capana01g002438	0.0106067	0.63866	83.9554	0.04357	3.56394	1.46497	164.032	37.0437
Capana01g002439	12.999	10.1269	8.96057	9.20064	5.82353	6.21886	8.72013	4.5467
Capana01g002457	175.873	5.54989	52.8281	14.6168	28.105	69.7571	78.3178	27.7302
Capana01g002460	17.6212	14.8189	25.2452	91.9239	28.9097	28.2001	23.606	238.209
Capana01g002464	25.5292	18.9237	16.1343	20.2907	0.043782	0.0175377	0.266186	0.0453877
Capana01g002473	2.48676	0.35334	0.760158	0.110878	0.345161	0.178679	0.12621	0.0768847
Capana01g002475	9.9476	12.3982	30.5736	46.3073	2.77771	4.12944	3.9515	28.4448
Capana01g002477	5.66868	0.352124	0.592035	0.118064	0.573035	0.459601	0.559953	0.103415
Capana01g002503	62.6529	56.9199	98.9954	133.387	28.291	39.0862	38.6231	24.2964
Capana01g002505	3.67966	3.45791	3.41439	0	0.456859	0.776118	0.40964	0
Capana01g002516	18.3191	0.562694	6.57374	0	1.26736	0.033393	17.4199	0
Capana01g002517	82.299	154.382	162.16	99.1363	162.285	121.291	144.747	62.8182
Capana01g002524	0.0679513	0	1.88813	0	0.506775	0.51787	1.89381	0.0666717
Capana01g002526	13.9613	15.595	21.5882	1.686	8.80293	12.8065	3.40654	3.93313
Capana01g002530	7.37311	4.95009	9.32933	22.2219	7.03552	14.447	8.57588	24.5676
Capana01g002532	0.208074	0.323357	0.777917	0.450822	0	0.00673833	0	0.0327983
Capana01g002551	0.899396	12.1606	15.6178	13.2825	7.06273	7.00072	1.68347	22.5856
Capana01g002554	0.774427	0.284527	0.415113	0.344636	0.0856345	0.208394	0.112991	0.219842
Capana01g002556	22.8337	36.8157	17.3952	21.8181	54.1323	29.4224	51.362	33.1187
Capana01g002558	10.1318	9.79378	5.86192	11.1599	13.4137	7.13292	14.8184	5.30942
Capana01g002565	138.926	28.9416	55.6146	19.9358	40.3141	58.6152	33.1507	21.0494
Capana01g002566	32.0472	62.6232	68.1992	60.8297	57.0391	69.5132	54.4378	34.3991
Capana01g002571	7.54822	6.06798	6.0571	1.53756	3.13952	4.01259	4.44608	3.67605
Capana01g002573	535.806	1525.32	1182.39	1148.76	1713.56	1481.65	1418.71	1255.64
Capana01g002585	1.30472	0.562572	0.574032	0.318562	1.7093	1.74936	3.14637	0.986293
Capana01g002588	1.53876	0.047715	1.6161	0	0.220754	0.98148	0.612178	0.0127953
Capana01g002590	11.138	5.5042	13.7845	33.1029	12.2875	17.2387	6.60774	34.5358
Capana01g002597	9.55221	0.560467	1.67245	0	0.325519	0.337832	1.56472	0
Capana01g002604	0.71052	0.343336	2.27892	0	0.703435	1.06746	4.66626	0.048989
Capana01g002606	0.285192	1.69157	6.15046	48.7511	63.7118	11.8699	16.1358	259.337
Capana01g002607	36.3786	46.7153	26.8777	28.3772	89.3603	40.3793	54.2599	21.7252
Capana01g002608	1.94068	2.33487	4.71381	0.728762	6.1526	6.2591	2.91277	0.526892
Capana01g002612	1.31977	1.27724	4.91199	5.2251	3.39942	3.23592	6.00782	22.9355
Capana01g002614	12.9951	8.40232	2.9798	2.31527	3.46916	2.64938	0.664484	0.973662
Capana01g002617	0.769918	0.809923	1.20886	1.2127	1.54458	1.74928	1.30712	1.24189
Capana01g002623	5.45829	37.1006	72.6319	41.517	333.187	51.6382	45.9847	90.2521
Capana01g002624	28.4359	31.8274	45.7289	37.7749	54.271	42.2875	47.6324	51.1587
Capana01g002627	12.7243	5.69108	11.9255	6.32143	5.46194	9.10697	7.41402	5.36929
Capana01g002631	10.8959	0.146593	4.27852	0.036318	0.562844	0.634675	0.505198	0.055149
Capana01g002638	84.4189	1.80244	2.7272	7.45871	9.26647	10.2563	3.14425	92.4803
Capana01g002641	152.073	48.2624	40.2447	39.7765	51.0322	22.5007	21.4502	81.2919
Capana01g002642	0.859146	0.143393	0.395164	0.098083	0	0	0	0
Capana01g002656	0.875538	0.309812	0	0.0760493	0.858461	1.93357	0.196209	0.118423
Capana01g002660	1.74154	0.341969	0.788399	4.82598	1.14552	3.0671	2.85561	0.395438
Capana01g002662	18.6336	28.2074	15.5013	1.26554	9.99001	11.7874	11.3732	3.55208
Capana01g002674	10.2755	56.0665	107.079	148.727	94.6969	156.219	83.4755	70.2142
Capana01g002675	1.11101	1.17906	1.88077	0.740005	0.128476	0.451537	0.682706	0.192534
Capana01g002676	61.4733	38.0621	23.1593	20.6184	28.1549	39.6129	15.9528	6.23018
Capana01g002682	24.9507	7.26193	9.84298	1.98708	14.3042	19.1632	8.2635	9.28031
Capana01g002683	66.4048	9.88808	9.44076	0.825636	14.4404	18.9458	8.67986	4.16651
Capana01g002691	14.3726	11.9969	13.4938	12.9629	8.92647	11.972	4.99576	13.4725
Capana01g002706	1.32884	0.0219623	21.518	0	0.293394	0.153007	26.4182	24.6023
Capana01g002719	5.43717	3.74788	5.38067	2.16623	1.9914	3.87429	3.30385	2.93378
Capana01g002721	4.28419	1.49044	2.24902	1.17844	0.75644	1.1353	1.5317	0.729545
Capana01g002730	1.75842	0.332432	0.20048	0.086278	0.418038	0.492772	1.04512	0.078077
Capana01g002735	0.850637	1.14713	1.24727	1.41925	3.21186	6.05038	3.93349	2.19848
Capana01g002736	0.0538217	0.0499303	0.134614	21.9771	1.89071	3.81226	4.92816	22.4939
Capana01g002737	14.4563	6.79066	8.61587	4.52746	5.25201	7.21735	8.9157	4.29024
Capana01g002741	1.6087	2.30274	3.76912	1.30341	9.31522	9.97723	6.75502	6.23483
Capana01g002754	2.90362	0.625309	0.493355	0	9.09489	4.21378	4.18239	0.791966
Capana01g002760	2.94439	5.25779	4.21463	0.739334	3.41381	4.13075	4.39659	3.05303
Capana01g002764	19.8871	54.0727	110.685	319.343	242.536	344.652	299.365	414.489
Capana01g002769	3.81718	5.25347	4.31278	6.48433	34.4826	5.41503	5.46135	33.7356
Capana01g002771	2.43722	8.68176	8.19445	13.0565	1.55181	7.52659	2.53404	3.65057
Capana01g002777	0.276696	0.152545	1.77222	0.0570577	0.176066	0.121124	4.11827	3.67419
Capana01g002782	0.113402	0.274034	0.183144	0.312874	0.347429	1.84018	0.250686	0.354857
Capana01g002783	8.80177	10.6535	15.0717	9.20886	8.25857	15.1122	10.2591	25.948
Capana01g002787	5.70828	6.88948	6.87299	7.48098	12.446	6.23525	6.01499	5.63961
Capana01g002790	12.7486	34.2648	29.807	1.17175	13.0743	19.2051	9.244	1.81127
Capana01g002794	5.55169	6.15106	5.40077	1.01701	9.72086	11.1357	13.1065	1.49859
Capana01g002796	3.09416	0.762686	2.99039	2.07123	4.99698	4.60742	4.14558	0.372405
Capana01g002802	56.9602	129.955	136.954	79.6253	140.222	124.231	118.543	135.492
Capana01g002806	78.4257	4.28952	1.8699	0.147683	0.453164	0.612919	1.7878	0.229683
Capana01g002809	0.121887	0.0793563	0.247217	9.53014	0.386158	6.7583	0.155984	0.410107
Capana01g002814	30.7504	0.380147	3.81691	0	0.747607	2.74043	5.01506	0
Capana01g002816	1.55051	2.55695	4.3958	1.23396	6.75743	6.52236	3.52697	1.07687
Capana01g002819	6.02617	12.5598	8.92834	11.2076	108.644	213.952	144.15	117.386
Capana01g002820	0.0439973	0.0477583	0.119478	0.918372	152.265	44.1031	84.4125	50.3009
Capana01g002821	2.93261	0.340484	0.371289	0	13.0696	5.38088	3.16871	0.547614
Capana01g002822	1.38658	0.972304	2.11998	0	0.194895	0.182048	0.645564	0
Capana01g002823	335.687	720.275	482.223	730.517	176.018	413.966	258.61	222.195
Capana01g002824	0.334563	2.85442	6.56719	22.5253	14.6097	3.74563	8.03465	3.83861
Capana01g002855	3.74232	0.132264	0.040523	0	0.110617	0.063053	0.0238375	0.021086
Capana01g002857	48.6042	49.1994	64.7145	42.6857	59.6035	64.5871	64.058	106.244
Capana01g002862	14.7485	19.169	21.3206	28.4649	17.8156	19.1763	16.849	18.7788
Capana01g002871	7.73655	5.17466	6.74479	3.03458	14.3655	27.9945	17.5122	20.9447
Capana01g002877	14.5726	8.83731	3.94509	2.36365	4.27324	5.65832	6.21564	0.284609
Capana01g002884	13.349	20.1867	35.9001	35.9239	23.9821	33.8443	22.9608	26.6858
Capana01g002888	0.238622	0.860106	0.983639	315.094	0	0	0	0
Capana01g002889	0.183802	0.139729	0.623034	81.7837	0	0	0	0
Capana01g002890	0.920015	0.042098	0.084587	0.0313867	0.092031	0	0	0.064279
Capana01g002904	28.8707	17.6384	19.4354	8.33536	15.2047	22.5184	15.8485	20.7717
Capana01g002912	2.131	1.82987	0.699624	0.540687	6.17391	2.95049	6.30196	3.65053
Capana01g002916	136.265	171.652	151.144	129.681	284.16	225.822	261.3	163.126
Capana01g002920	3.49834	2.02535	0.95972	0.16499	0.651138	0.657913	1.57035	0.671169
Capana01g002957	92.7559	134.655	47.6638	34.5457	35.0988	75.2859	15.4698	44.6972
Capana01g002960	105.767	2.18629	0.389577	0.0156867	1.48169	4.41721	0.725762	0.0611883
Capana01g002966	240.061	320.951	257.819	116.906	713.109	904.571	405.842	379.618
Capana01g002986	191.799	89.3322	89.1143	2.81636	23.364	35.0552	72.4905	2.49681
Capana01g002999	0.0107083	0.0501723	0.361611	0.175689	0.0125085	0.01771	0.0368015	0.210715
Capana01g003017	3.98966	2.70351	4.07329	2.21224	4.35658	9.81913	5.39203	4.05915
Capana01g003018	8.39996	10.9182	11.8331	7.53566	7.08845	10.4944	4.18099	8.01469
Capana01g003019	2.33151	3.81181	4.82314	3.40208	4.58554	3.19692	2.3834	1.13335
Capana01g003035	2.68773	6.78866	14.9432	7.73293	23.8591	6.90456	4.98995	8.14022
Capana01g003043	0.172809	0.17375	0.238714	0.40571	0.082993	0.136049	0.045014	0.101712
Capana01g003049	74.9423	13.4378	27.5268	7.6266	96.152	65.7668	21.1757	25.0165
Capana01g003054	2.066	5.8894	5.26367	4.23555	2.21459	2.40188	2.65777	2.27972
Capana01g003055	0.838643	1.17473	0.524033	0.32753	0.585742	0.212094	0.227331	0.093537
Capana01g003065	0.41098	1.06529	1.23675	1.18514	0.900631	0.524739	0.542952	2.5402
Capana01g003067	0.588281	7.4574	7.25758	3.13992	54.804	9.46528	11.2801	10.9569
Capana01g003071	1.73971	3.9572	6.2897	2.62159	0.787041	0.911971	1.30377	2.10551
Capana01g003076	0.0356567	0.021074	0.053424	0	0.095578	0.214768	0.027374	0.435969
Capana01g003080	4.2408	5.8566	3.60852	2.50023	7.85657	11.365	8.79699	6.33321
Capana01g003083	0.592469	0.00633667	0.108089	0	0.185326	0.198463	0.0820435	0.026282
Capana01g003085	15.7617	4.9084	3.22938	1.02658	1.04508	2.30056	1.24748	0.691143
Capana01g003087	56.9258	74.4013	27.1038	9.8672	53.3893	48.4634	47.6125	2.08721
Capana01g003090	3.61673	0.238984	0.711641	0.016748	0.291419	0.511184	0.8764	0.0850357
Capana01g003096	26.117	22.6632	25.4412	28.1911	21.8853	22.9147	21.8016	13.1513
Capana01g003102	10.8282	5.57961	11.098	2.63442	1.96448	4.77775	3.43906	1.70095
Capana01g003109	17.0234	15.265	13.9165	7.70261	13.568	13.1474	25.6009	32.3478
Capana01g003112	371.902	286.374	347.179	415.012	953.796	739.893	2213.53	237.52
Capana01g003113	388.024	350.796	195.953	661.863	248.767	191.342	211.628	368.316
Capana01g003120	6.11862	3.89587	3.86034	1.82046	2.25919	3.28784	4.01472	3.9029
Capana01g003121	9.51283	6.33722	12.7877	8.27109	19.1689	18.0809	23.3209	19.6476
Capana01g003137	21.2098	8.78247	9.73444	4.95095	4.91772	6.05295	5.16322	4.32706
Capana01g003167	0.20581	0.059263	2.92619	0.17158	3.36876	1.40989	1.28666	2.84056
Capana01g003176	8.39952	7.5973	8.7972	3.8041	3.35038	7.29219	5.46373	3.56105
Capana01g003178	5.50989	1.06807	2.74528	0.0731897	0.72094	0.562231	4.35511	0.267179
Capana01g003180	3.02578	3.13429	10.9353	14.5059	5.86533	8.45617	6.61717	14.3786
Capana01g003196	16.2589	16.7401	19.8683	48.8021	21.2139	33.3435	28.4856	31.0271
Capana01g003198	17.6504	3.2601	4.82805	50.6099	3.13775	3.99277	6.07931	52.6139
Capana01g003202	16.0036	11.452	8.29126	2.95701	3.29931	3.43105	4.49564	1.65576
Capana01g003236	1.21725	0.433249	3.97048	0.830498	0.191101	1.02873	1.21626	0.339132
Capana01g003237	0.318534	6.30251	7.56638	1.10244	0.144572	0.784431	0.724665	0.747124
Capana01g003238	0.743854	0.311916	11.5334	84.5951	1.02102	3.22925	3.99219	115.256
Capana01g003240	3.26259	0.439609	2.5816	0.0452757	0.423172	0.365404	2.95594	0.012609
Capana01g003242	0.641037	0.0618327	2.98999	0.0133243	0.334431	0.532031	1.82621	0.105385
Capana01g003244	26.4245	52.5046	59.5319	17.1402	32.621	74.5987	21.5409	16.57
Capana01g003245	0.514046	1.03582	1.21786	0.0420153	5.74664	0.874477	0.789884	0.882364
Capana01g003246	0	0	2.7409	0	0	0	7.668	7.73045
Capana01g003272	4.55001	3.2441	2.27131	2.27624	1.09187	1.54459	0.937644	1.88988
Capana01g003273	0.474669	0.85105	0.390642	1.02024	0	0.145591	0.0591485	0.056092
Capana01g003280	15.6435	20.3884	17.7928	9.89161	8.9103	11.5837	6.73414	8.38724
Capana01g003283	1.43687	2.43984	2.34586	0.391816	2.64375	1.54771	5.94019	1.52711
Capana01g003288	20.6529	21.5329	22.3876	7.42914	7.49239	16.7202	16.4972	4.83501
Capana01g003289	8.07641	1.48191	8.06315	33.4819	14.7736	16.1216	21.8475	46.9105
Capana01g003292	123.368	303.138	176.332	9.92249	326.927	264.072	102.755	20.5255
Capana01g003299	0.917324	0.156672	0.46118	0	0.123478	0.173222	0.265084	0
Capana01g003304	0.69763	0.255702	2.72285	1.37683	0.117807	0.223118	0.326098	0.796908
Capana01g003306	17.6381	13.7158	13.6037	14.1027	5.48931	7.8672	6.99793	9.1449
Capana01g003313	18.5121	20.6316	116.128	171.512	80.2369	75.9488	87.9134	147.696
Capana01g003323	351.827	577.421	327.73	537.528	686.693	347.675	318.117	430.697
Capana01g003327	46.0264	137.385	111.697	48.5821	84.6774	109.32	63.9695	47.3778
Capana01g003330	0.374821	2.08626	1.70647	3.789	0.871994	3.17512	0.514564	5.66161
Capana01g003333	1.39262	2.28272	11.2292	11.1024	3.28721	14.6283	7.06208	5.2859
Capana01g003346	8.53527	2.54345	0.938989	0.121929	0.394706	0.811482	0.408599	0.107639
Capana01g003347	6.08649	1.70131	1.89769	0.299237	0.633895	1.79618	0.599456	0.677915
Capana01g003356	43.4527	22.2055	40.139	27.7824	16.4333	30.8493	19.2848	20.621
Capana01g003359	34.0158	44.7347	47.2915	0.0199903	17.481	35.5564	11.9957	2.62565
Capana01g003373	0.536368	0.146031	0.0174227	0.139318	1.10301	1.29642	0.217675	0
Capana01g003374	0.288334	0.431355	0.520267	0.0289207	1.82423	6.62518	0.336874	0.139318
Capana01g003379	42.1067	57.7824	61.012	108.8	68.3704	44.9005	64.7235	27.4791
Capana01g003380	98.5511	32.8337	33.754	56.5776	18.8241	27.4907	28.7846	30.7401
Capana01g003383	2.20518	0.0427243	0.021653	0	0	0	0.0372185	0
Capana01g003392	8.79568	5.02315	4.73606	7.5085	3.74504	3.56648	3.55936	3.17075
Capana01g003397	8.91292	2.49893	0.473413	0	0.19129	0.0443157	0.025177	0
Capana01g003398	1.02301	0.274994	2.40956	0	0.160394	0.17754	3.42491	0.15947
Capana01g003399	7.67708	8.28666	9.4582	22.0802	7.09664	23.3314	5.2245	14.2685
Capana01g003420	0.051097	0.934068	7.61776	6.16112	7.06758	6.01882	4.72308	10.4451
Capana01g003444	3.80683	5.4491	18.7199	2.36132	16.6013	16.8213	6.55386	2.24629
Capana01g003445	47.7978	27.9151	3.03425	0.050858	5.18868	2.44934	0.577136	0.044917
Capana01g003448	12.0769	11.674	42.2733	132.967	42.0478	43.1278	33.4623	192.922
Capana01g003450	6.59212	8.71236	12.2743	11.0704	11.1511	11.8799	12.9335	16.0269
Capana01g003451	6.3584	6.29462	19.6799	40.4756	22.9673	24.1808	18.0574	81.3572
Capana01g003453	12.7214	22.6153	28.7665	50.1317	27.9911	38.2131	20.412	23.0596
Capana01g003456	0	0	0.091234	0	7.10747	12.1997	2.10287	0
Capana01g003465	3.5201	0.241542	4.47203	0.550105	3.68937	6.02286	9.59306	1.83238
Capana01g003482	3.69579	10.8174	11.2322	0	2.34194	2.42655	5.89529	0.936215
Capana01g003486	13.0904	4.61019	4.23258	4.3139	4.58461	7.88446	4.49125	11.9401
Capana01g003488	0.657156	2.44343	1.59739	0.920889	6.9682	10.684	2.90554	1.95629
Capana01g003497	0	0	793.139	0	0.057739	0.0312493	2845.72	20.8162
Capana01g003498	0	0	191.943	0	0	0	353.95	23.8299
Capana01g003499	0	0	8.9867	0.162893	0.115756	0	6.65138	107.145
Capana01g003500	0.05891	0	233.901	1.27109	0.700217	0	530.227	1408.37
Capana01g003501	0.047399	0.0317377	13.8369	0.600546	0.142436	0	67.6111	1122.61
Capana01g003502	6.37003	9.41196	2.41043	0.108164	0	0.036528	1.61266	0.0417647
Capana01g003516	7.66063	4.14367	4.98314	0.190794	1.13157	1.68618	2.58378	0.234078
Capana01g003517	22.1392	45.3677	30.2859	43.9785	37.2099	40.2875	47.3661	59.7204
Capana01g003518	15.7107	26.4879	43.8316	64.8753	28.2923	32.2364	30.8289	51.4131
Capana01g003533	8.7522	2.12294	0.867188	0.0663993	0.514088	0.266023	0.243055	0
Capana01g003534	22.0498	17.5439	22.1818	34.8551	61.5807	84.7266	35.5178	49.183
Capana01g003535	0.0895003	1.19045	2.45305	3.00423	3.10862	1.94803	4.19909	8.39243
Capana01g003545	45.6414	32.718	34.7174	0.0612963	12.6304	16.1842	6.11076	5.95379
Capana01g003548	5.77203	37.4682	103.229	19.8878	60.3116	47.4768	10.9467	18.4429
Capana01g003550	0.900972	0.283936	0.543468	0.569141	0.684525	3.32199	0.233218	0.235766
Capana01g003555	183.109	165.942	135.911	208.299	197.032	119.055	162.651	110.856
Capana01g003557	16.4284	21.2672	14.5162	18.3659	22.2844	21.0757	29.0948	15.7056
Capana01g003563	12.0988	19.7254	18.8574	28.9605	19.1078	19.0642	18.0092	28.8573
Capana01g003565	9.3955	9.65024	8.98796	13.1431	5.67163	6.67952	6.32108	6.24746
Capana01g003570	0	0.0471497	1.3657	0	0.197377	0.0301067	5.02929	0.14349
Capana01g003577	4.14389	0.67097	0.0213337	0	0.791075	0.140437	0.201111	0
Capana01g003579	34.4855	19.8612	28.9241	25.3313	33.406	53.4018	36.9935	49.4993
Capana01g003585	1.48215	2.60476	1.49814	2.30414	0.027003	0.0313347	1.20318	0.520793
Capana01g003588	40.4751	32.9035	13.5703	11.6279	12.1976	12.2674	12.5973	10.1654
Capana01g003592	114.739	98.036	47.4107	7.41404	20.6459	18.1329	35.0896	3.16614
Capana01g003593	71.8173	20.8493	16.8292	6.42927	8.94327	8.56936	11.5659	9.46248
Capana01g003600	8.58669	10.8858	14.726	10.2309	18.3502	22.5672	18.3398	10.274
Capana01g003612	3.57971	1.11189	0.346361	0.016298	1.01372	1.42975	0.846145	0.286029
Capana01g003617	10.299	3.14349	3.9967	6.91816	5.30507	7.05922	4.82469	14.2475
Capana01g003618	0.23367	0.0660907	0.672098	5.83456	0.11667	2.13149	0.236981	3.58107
Capana01g003627	0	0.0242543	0.111276	6.47563	0.048897	1.42141	0.0287005	0.399939
Capana01g003633	53.0937	37.6664	12.3503	0.48267	3.71914	4.95067	5.98142	0.832745
Capana01g003634	4.88513	6.36907	2.02336	2.37825	2.22008	2.17285	3.13163	1.61117
Capana01g003637	13.9664	15.3005	15.8372	10.2455	30.2209	16.6148	13.6141	30.17
Capana01g003639	8.6746	15.1528	19.8944	13.5648	16.1511	17.7254	10.9065	16.3385
Capana01g003644	6.73777	3.20699	1.66142	0.574456	0.783212	0.468602	1.36654	0.28315
Capana01g003655	13.5753	5.86705	4.40992	1.50583	2.8763	5.01835	5.07777	1.84651
Capana01g003658	0.561411	0.0911263	0.219674	0	0.943729	0.689896	0.514864	0.106219
Capana01g003662	105.377	117.85	52.0358	72.4324	251.091	133.528	271.638	52.6382
Capana01g003665	6.9071	3.65469	5.51229	1.0138	0.961826	2.12107	1.6003	1.18939
Capana01g003667	0.955354	0.22515	6.72952	0.102843	1.62408	1.78704	10.8383	1.47995
Capana01g003669	0.802037	0.0407203	1.26177	0	0.040476	0.085492	0.947999	0.0278867
Capana01g003670	1.74273	0.0330557	1.28382	0	0.096265	0.0206977	0.390225	0.0159657
Capana01g003671	0.748709	0.674233	1.2735	0.390601	1.52135	0.930987	3.09595	0.955015
Capana01g003672	0.201579	0.065053	0.206428	0	0.404085	0.102284	0.62332	0.118616
Capana01g003679	38.5867	2.44619	37.1002	102.05	5.32022	9.64089	21.8501	714.978
Capana01g003695	21.2003	33.7594	38.2413	63.3286	133.494	61.2342	48.6266	113.391
Capana01g003701	38.5497	31.9141	34.0256	45.362	43.294	36.6569	48.0626	19.5606
Capana01g003703	34.0456	23.2373	29.1924	22.3654	0	0	0.395919	0.309009
Capana01g003704	1.37288	7.43793	9.3596	2.98705	4.04826	3.90104	4.21409	9.62236
Capana01g003707	30.528	35.8224	46.7941	16.957	23.2654	31.276	29.755	50.1168
Capana01g003714	3.69926	2.51514	2.26818	0.839655	4.17174	5.26558	4.40166	5.65101
Capana01g003718	11.46	2.52781	2.63278	0.989911	0.734837	0.771135	1.10017	1.48004
Capana01g003720	474.164	286.342	195.196	353.983	116.973	231.801	156.431	149.381
Capana01g003722	1.60188	0.831393	1.4837	1.24707	5.57295	5.73822	2.78087	9.29593
Capana01g003723	0.410944	0.0181277	0	0	0.05789	0	0	0
Capana01g003735	9.05183	4.69903	8.15825	3.03044	2.84228	4.71984	6.94731	4.11205
Capana01g003737	4.59585	3.98029	7.64035	5.64729	0.685218	0.999226	0.209422	0.485669
Capana01g003739	19.3221	13.2867	12.2791	12.0481	0	0	0.107265	0
Capana01g003745	20.347	33.2778	58.765	70.5806	32.6187	61.2953	35.1896	87.3196
Capana01g003750	0.0815333	0	1.18749	0	0.0381435	0	1.76451	0.344428
Capana01g003751	19.8386	16.9732	25.9761	12.3816	20.3768	62.3705	11.243	21.6465
Capana01g003760	42.2984	2.02779	2.62963	0.01349	0.525263	0.917817	0.343572	0.0277193
Capana01g003763	0.051682	0.303553	2.34529	11.7358	0.226626	2.72841	2.63876	7.40346
Capana01g003776	2.86195	2.6723	2.89915	8.07755	1.93259	5.16827	1.45519	2.07607
Capana01g003777	11.2367	15.4902	6.53153	5.77035	26.9858	16.1859	20.7208	9.39526
Capana01g003790	4.43006	2.80361	3.7978	2.86083	1.08157	2.00729	2.74227	1.62429
Capana01g003802	68.4643	42.4463	18.6541	0.359475	2.32816	3.50924	2.07457	0.916734
Capana01g003816	38.9397	57.4534	67.8699	57.0283	85.0589	78.4599	65.8952	39.3665
Capana01g003827	26.9268	16.4509	17.9743	6.80256	7.59369	8.7011	7.80552	10.5171
Capana01g003831	3.3006	2.82363	4.01411	2.82339	0.883948	2.25622	2.4812	2.85238
Capana01g003854	0.434805	0.678044	0.937177	81.0244	1.06213	1.56255	1.1419	118.398
Capana01g003855	0.0324283	0.088459	0.062838	0.111373	0.062492	0.522106	0.274477	0.130585
Capana01g003860	23.9442	16.5422	14.8464	16.9446	6.34339	8.33818	10.4426	10.7063
Capana01g003867	88.7141	90.1435	73.721	92.7889	50.7318	68.2876	56.6256	40.6852
Capana01g003889	2.48719	32.2444	44.0976	38.8788	60.6288	100.476	43.3799	118.251
Capana01g003894	970.906	1075.85	299.069	279.613	374.346	332.305	728.7	225.693
Capana01g003897	1.67338	0.686809	0.835092	0.237102	0.38578	0.569916	0.298856	0.148835
Capana01g003904	11.4723	14.9667	22.5079	15.0125	12.5616	36.367	23.5933	24.3056
Capana01g003905	4.53034	6.66442	2.48907	5.60055	31.3648	15.6737	47.4669	17.7167
Capana01g003906	4.05362	1.14574	0.698358	0.0214857	3.46457	2.07152	1.47218	0.311654
Capana01g003908	319.292	13.3645	57.1119	0	10.8555	4.17722	40.308	0
Capana01g003910	324.644	169.66	295.632	390.778	1039.83	606.767	356.787	480.901
Capana01g003927	42.1246	10.5286	12.7238	2.67427	5.94253	3.93214	28.5514	6.21793
Capana01g003941	1.41417	0.94075	0.890788	0.48419	0.160845	0.14091	0.047951	0.137009
Capana01g003955	6.92543	28.8833	11.0453	0.269453	19.1416	7.90779	4.37685	1.03265
Capana01g003957	62.2062	65.6645	52.2975	120.82	58.0395	51.4134	56.6255	57.2138
Capana01g003958	27.1016	0.026132	3.298	0	0.414205	0.314193	0.229963	0
Capana01g003977	15.3593	11.125	6.29803	0.983022	1.46721	2.72263	2.38897	1.56428
Capana01g003980	3.08518	0.310006	0.147856	0	0	0	0	0
Capana01g003981	29.5909	38.3853	45.4069	82.7415	128.183	40.2883	37.3207	79.0473
Capana01g003983	6.24019	3.96508	3.47108	3.32864	1.31907	1.9555	1.72967	1.35729
Capana01g003985	3.52678	5.9899	20.0143	12.9141	9.661	18.8174	21.6469	6.02017
Capana01g004000	8.946	7.94279	6.627	5.89321	3.10833	3.26742	5.30599	5.25671
Capana01g004001	11.4433	11.4395	13.9559	58.4987	9.47727	8.82087	8.95864	21.2535
Capana01g004008	18.7237	11.1207	12.4092	7.71604	1.17808	1.45654	1.26926	0.455903
Capana01g004015	0.901988	0.687743	1.05151	0.14544	0	0.155298	0.109328	0.147204
Capana01g004019	20.1244	20.0332	15.821	13.8183	8.94227	8.74722	11.4947	9.12173
Capana01g004020	1.51063	0.83218	0.615842	0.565951	2.03093	6.73865	0.796893	0
Capana01g004028	32.8002	36.1556	32.0798	14.6595	66.3807	44.4956	44.0539	16.4615
Capana01g004034	1.11167	0.0814613	0.168534	0	0.12549	0.586747	0.488192	0
Capana01g004047	1.30703	1.33844	0.911644	1.25254	1.1891	1.29982	2.02041	0.665972
Capana01g004048	1.56517	1.22357	1.20534	0.199553	0.126922	0.517405	0.4815	0.073972
Capana01g004052	10.8087	20.9904	32.0351	8.34158	37.6971	62.2466	22.511	30.3845
Capana01g004056	96.1567	19.8908	44.0424	22.5764	30.4332	27.6679	11.7645	5.52666
Capana01g004063	11.139	4.54769	2.51671	0.08383	1.73104	1.63701	3.11972	0.196927
Capana01g004067	5.14878	3.00964	3.31842	0.612625	1.07677	0.82824	0.689275	0.767758
Capana01g004070	6.19318	3.80992	11.4855	18.7564	3.10428	4.77926	5.27855	8.5976
Capana01g004074	6.78941	4.83504	5.25996	2.58038	2.62914	4.16998	3.88062	1.30617
Capana01g004081	13.6971	11.3819	15.2546	12.8427	4.54801	6.48426	5.42759	9.3078
Capana01g004083	1.42764	1.12207	0.434365	1.28987	0.44977	0.651164	1.27887	1.3375
Capana01g004097	464.135	1267.34	1355.07	1032.35	1380.91	1223.2	1269.91	1109.94
Capana01g004098	10.7361	14.4219	2.98594	1.2186	19.8	4.65579	14.3123	2.41251
Capana01g004099	57.381	106.801	123.794	375.215	194.825	132.213	236.574	217.741
Capana01g004101	27.8096	30.8082	53.8072	430.58	51.1346	74.6857	32.7938	73.3056
Capana01g004111	5.98473	7.84427	10.1035	5.20163	3.23496	3.17528	3.3512	2.47361
Capana01g004117	21.294	49.7574	77.5254	87.7968	86.2982	93.6739	82.8113	105.257
Capana01g004119	15.909	7.59676	5.26561	0.489822	2.43568	0.84197	11.4074	0.648338
Capana01g004121	3.38561	6.77332	6.66993	14.0143	18.0183	13.0917	13.3131	13.7497
Capana01g004122	14.5973	3.4688	2.07669	0.613092	1.81218	1.41093	1.3407	1.6154
Capana01g004124	0.612969	0.148619	0.0561133	0	0.334859	0.733017	0.234417	0.428463
Capana01g004201	266.747	246.082	50.1735	13.8619	5.74014	32.3728	10.9001	22.9099
Capana01g004209	8.98652	10.1313	6.22038	15.5103	12.8228	7.40557	9.29333	7.19029
Capana01g004217	0.122581	0.0239457	0.035707	0.0176383	1.3081	0.990602	0.0674535	0.150166
Capana01g004218	0.140617	0.028389	0.255264	0	6.41661	2.02159	1.06128	1.12622
Capana01g004220	0.138054	0.070621	0.155176	0.139651	1.0317	0.3812	0.104605	0.252372
Capana01g004227	1.48584	0.0143847	0.338619	0.814479	0.0106925	0.008566	0.073478	0.0380453
Capana01g004230	0.509267	0.607299	1.67855	87.3256	0.487741	4.05844	0.169556	7.41847
Capana01g004239	0.0426637	0.73785	0.85521	0.315302	0.163401	0.346958	0.52876	0
Capana01g004244	10.2894	12.5085	5.41934	4.70159	2.60237	2.87228	1.75502	2.09546
Capana01g004249	2.55638	0.134753	0.172109	0	0.264604	0.315937	0.382811	0.0443727
Capana01g004255	0.792066	0.5031	5.39903	4.46126	0.749179	0.835752	5.43218	1.03563
Capana01g004259	5.3429	3.60456	5.4213	0.487391	1.34641	1.85218	0.956688	0.0821893
Capana01g004268	6.74282	3.46496	4.63906	0.036218	1.47617	2.8523	2.77001	0.149466
Capana01g004270	17.6031	2.42036	0.792166	0	0.315115	0.156692	0.181145	0
Capana01g004281	77.2161	135.764	129.17	76.6254	38.6485	84.3377	60.5065	17.3464
Capana01g004287	5.05388	3.85188	5.00173	0.0503613	2.94502	5.22532	2.69775	0.594249
Capana01g004288	18.8024	10.8402	11.1766	3.67747	4.31262	4.17392	14.8405	19.2773
Capana01g004303	6.26746	6.2201	9.99434	1.76821	0.16245	0.094301	0.210458	0.0982253
Capana01g004313	1.72086	1.55822	1.47767	2.07463	1.31438	0.762514	0.732678	2.01979
Capana01g004314	66.1604	68.3441	135.149	124.823	51.385	116.795	53.0759	155.86
Capana01g004315	0.533771	1.19363	1.39702	0.553283	3.05317	4.25078	2.85638	3.05945
Capana01g004338	1.93375	6.49919	16.4968	2.17691	14.3589	10.592	6.58973	4.67368
Capana01g004357	17.5282	30.3438	50.0479	26.4538	131.063	66.5311	79.2855	38.6116
Capana01g004361	0.542518	0.617899	2.11563	2.16735	1.18491	3.14956	1.24992	2.44802
Capana01g004362	18.5395	9.40861	9.61791	14.6136	7.12159	11.648	6.25167	12.59
Capana01g004366	32.19	30.9873	27.7522	60.6105	28.5816	27.1699	27.0144	25.8373
Capana01g004368	0	0.030101	2.33833	0	0.275112	0.962827	9.97736	0.171146
Capana01g004369	0.514795	0	0.250424	0.150504	0.050644	0.0977053	0.0425895	1.22895
Capana01g004370	4.2986	2.41967	0.941061	0.0426267	2.49885	2.0344	0.978553	0.28729
Capana01g004371	2.28779	4.75775	3.01501	6.10681	6.04423	3.18726	5.31383	5.20794
Capana01g004374	2.07455	1.67666	1.46344	0.304719	1.07846	1.0406	1.71116	0.601039
Capana01g004379	64.6114	4.6349	5.81195	0.369198	17.5616	22.8528	5.1314	2.86663
Capana01g004380	1.7527	6.29741	2.86602	5.50345	4.36583	3.04629	2.77702	3.13371
Capana01g004387	2.38582	1.29338	1.52625	1.36665	2.17192	1.65073	0.797181	0.503914
Capana01g004390	9.9069	9.04312	8.58336	16.5029	9.04976	9.50987	14.9911	13.1541
Capana01g004395	0.915311	0.47875	0.677435	0.0206983	0.356359	0.773685	0.323425	0.587061
Capana01g004400	0.101812	0.654839	0.509742	0.303274	0.131096	0.108067	0.327914	0.329294
Capana01g004401	52.8813	54.4467	58.3321	77.9201	85.6376	106.065	53.8274	79.0767
Capana01g004411	4.44689	5.81042	4.02511	4.5937	5.91059	3.15005	7.75856	4.40514
Capana01g004430	55.0394	0.0671847	0.0842877	0	1.12109	0.0728063	0.038727	0.00572833
Capana01g004439	41.2573	87.7509	44.0706	34.4914	102.561	73.2141	74.8452	38.7139
Capana01g004441	2.11713	0.301911	0.259395	13.9292	0.024709	0.59437	0	9.01255
Capana01g004442	5.25542	4.38149	13.3677	20.6063	3.2817	5.87446	6.89131	38.138
Capana01g004450	4.98887	2.53681	5.8844	1.39163	2.91174	2.94107	2.52232	3.07668
Capana01g004456	3.18207	9.12057	13.8683	18.3458	21.2647	12.9816	12.1507	17.8285
Capana01g004459	1.23639	0.236607	0.426329	0.106909	0.384761	0.918361	0.602621	0.495604
Capana01g004460	12.6373	10.838	10.6541	17.4204	7.33648	10.1693	8.34776	5.75517
Capana01g004463	7.93408	10.9522	15.0413	12.8859	23.215	25.4516	20.2396	21.1088
Capana01g004464	1.75055	0.475345	1.24866	0.084667	0.219106	0.277295	1.75554	0.181124
Capana01g004465	0.150084	0	0.00609333	0.0273583	17.471	22.8571	17.4003	30.5383
Capana01g004468	5.16934	3.821	3.7891	2.66896	2.00026	2.81172	2.88354	4.18373
Capana01g004472	0.258351	3.97485	2.77206	133.118	1.81057	48.8088	0.445612	12.6188
Capana01g004474	22.4103	5.96841	8.33423	15.5644	3.29328	10.0365	3.97395	9.3651
Capana01g004476	9.55473	13.1232	11.1916	15.8917	6.0547	9.10531	6.69885	8.06796
Capana01g004480	12.4406	13.524	5.95521	26.1735	12.1008	73.0185	14.1718	9.48797
Capana01g004481	6.74522	7.32827	7.35472	9.07759	17.7384	13.6719	13.3428	10.8222
Capana01g004493	333.842	76.4048	176.139	17.5814	502.417	167.547	102.004	41.7682
Capana02g000023	2.07721	1.21963	1.08818	0.334295	1.45134	1.47132	1.36841	1.44211
Capana02g000036	0.177373	3.64758	6.24257	0	6.77949	6.18063	9.9654	0.272589
Capana02g000048	41.9234	93.3225	94.2383	75.5462	14.2179	23.1794	17.5917	27.4403
Capana02g000053	22.6651	2.03375	95.2339	0.214247	11.0124	19.2482	136.194	0.992555
Capana02g000055	1.09699	0.0355903	1.12795	0	0.063492	0.116126	0.681881	0
Capana02g000058	0.589076	0.108524	4.37268	0.670033	0.498358	0.685178	1.09392	1.82456
Capana02g000059	4.65362	9.73788	5.16944	12.1553	5.88157	9.96402	3.53641	13.946
Capana02g000060	3.56587	10.8464	18.4094	43.9051	1.56395	11.9288	4.12657	58.5934
Capana02g000064	39.1913	14.5261	17.2539	9.06247	1.10857	2.41455	1.19238	1.77866
Capana02g000072	6.60304	2.25337	0.596712	0.059917	1.15408	1.15589	1.22604	0.687356
Capana02g000074	0.74273	0.552697	2.53432	45.1911	4.56349	2.32059	2.41156	21.5285
Capana02g000078	6.55034	4.28517	7.28671	1.62728	2.10574	3.12871	2.77388	2.53166
Capana02g000082	0.799616	0.128125	0.450104	0.187849	0	0.0121557	0.246847	0
Capana02g000085	7.22678	6.67998	4.44097	3.83045	2.73298	6.64587	2.38876	4.37795
Capana02g000088	26.5679	27.8548	50.6278	55.6597	16.1627	33.5342	23.8088	39.817
Capana02g000096	6.51991	5.66388	3.74549	1.57753	11.7452	7.80508	5.12966	1.17432
Capana02g000098	1.64199	2.18254	2.81598	1.62085	0	0.00449533	0	0.0311867
Capana02g000107	0	0	1.57521	1.7024	0.229195	0.033006	2.748	12.7601
Capana02g000109	19.7361	22.62	35.5483	40.8196	53.1722	70.6522	38.1795	63.1733
Capana02g000111	7.5153	9.93052	14.4276	6.50049	7.91664	9.25519	8.37371	17.168
Capana02g000114	6.0649	13.0256	4.42121	4.0335	10.9073	9.7641	6.04022	2.1136
Capana02g000122	26.8974	29.231	32.29	31.4108	53.2898	37.6128	31.6664	25.0389
Capana02g000136	1.45375	0.767471	0.783284	0.0246367	0	0.0944117	0.045642	0
Capana02g000138	2.40175	1.51817	1.12413	0.530002	0.620405	0.768813	0.936729	0.435769
Capana02g000141	5.00804	6.95659	7.67423	4.62459	2.42721	3.27681	4.39969	3.32508
Capana02g000157	3.54457	1.05449	4.46482	0.075208	11.7545	12.7997	10.0639	5.74857
Capana02g000161	8.95368	9.06109	10.4598	0.712813	5.46284	6.84905	4.40246	3.31294
Capana02g000162	0.0608527	0.088859	0.127494	0.722478	0	0	0	0
Capana02g000167	69.1882	123.243	110.636	72.9873	70.2992	60.4772	59.0429	35.2283
Capana02g000175	0.659416	2.62893	6.06764	14.3515	6.06273	11.3153	4.15488	5.01195
Capana02g000177	12.7631	12.5641	12.8053	0.820549	6.76218	7.37575	12.9428	2.39723
Capana02g000189	5.14905	3.82162	2.19387	1.53115	1.46548	1.08675	2.06467	1.95228
Capana02g000191	13.0968	8.54326	12.5523	10.9703	4.63114	7.6303	5.51704	5.93001
Capana02g000193	8.37181	5.64359	9.82594	7.82924	3.05163	5.40467	3.4578	3.95334
Capana02g000206	9.52839	5.68642	8.14274	6.2962	2.95488	4.51521	4.73108	7.51255
Capana02g000207	4.35774	5.0871	5.93833	5.86098	7.57237	8.54663	7.49885	6.85397
Capana02g000212	1.51733	0	0.0103727	0.105394	0.70501	0.456322	0.043417	0.330596
Capana02g000217	26.5691	10.1095	13.8071	6.56344	4.25148	9.58725	5.72653	6.46614
Capana02g000218	45.7188	8.00314	4.00381	0.129648	3.351	3.52725	4.59997	0.0812027
Capana02g000224	12.0374	22.9525	19.9541	8.66127	0.711537	1.48571	1.70741	0.749597
Capana02g000234	2.88346	3.69969	4.89821	16.2505	3.07107	3.06357	3.20748	5.51576
Capana02g000242	17.6677	11.3145	7.16838	4.46547	6.19046	5.7904	7.29641	5.11247
Capana02g000265	0.0684687	0.030638	0.841669	0	0.422771	1.36029	0.851631	0.060049
Capana02g000273	13.1525	16.4793	26.3424	8.9044	18.1131	51.3024	24.8085	16.2179
Capana02g000278	1.4207	1.27195	3.00042	1.19	0.89884	1.31834	0.969504	1.51894
Capana02g000283	19.1899	0.0238363	25.9057	30.1205	14.6016	16.3581	21.94	20.1074
Capana02g000292	9.43208	6.02477	5.32759	9.25609	4.84941	5.07982	5.3969	3.55436
Capana02g000306	18.0003	54.4302	28.7093	135.841	17.4011	61.5467	60.9025	31.3611
Capana02g000317	0.447832	0.293808	10.364	2.45788	0.84331	3.29118	7.67324	14.3713
Capana02g000332	11.8122	7.08311	10.9695	7.23827	4.78685	5.22154	4.80824	6.76536
Capana02g000334	95.4041	38.3608	11.454	2.13279	19.7098	10.7046	19.0673	9.15127
Capana02g000339	140.895	59.3454	60.4768	30.9936	38.3764	54.0392	55.4155	36.3052
Capana02g000350	37.1035	26.3752	17.2139	8.67883	7.57888	11.8217	9.58118	17.7588
Capana02g000372	3.22399	2.92982	1.91264	2.41854	6.25669	4.92331	7.43858	4.18246
Capana02g000385	1.3622	2.56498	1.71444	1.81678	1.81654	1.52021	3.006	2.07952
Capana02g000386	8.89964	12.2057	6.50497	3.42487	12.5718	8.60008	20.4019	5.23826
Capana02g000410	6.87989	11.2259	18.1273	29.0381	17.1857	18.3347	16.6731	21.9713
Capana02g000411	7.49805	9.48992	6.69144	1.74371	3.77201	5.13394	6.55759	3.10804
Capana02g000413	6.28471	11.6063	5.41809	3.31093	0.882905	0.688986	1.07764	0.54805
Capana02g000416	10.6195	10.7976	18.9319	46.2654	32.0153	15.9308	17.8106	36.7236
Capana02g000420	4.03803	5.72773	4.22192	2.95683	5.12086	4.28108	4.78773	3.17731
Capana02g000436	4.71032	4.09967	1.76351	0	1.50012	4.43882	0.792272	0.162553
Capana02g000442	1.85049	0.806038	2.22575	0.590606	1.54018	2.28545	1.98941	1.26701
Capana02g000448	13.516	12.0228	11.8434	1.42236	4.47717	9.19005	5.89802	2.12434
Capana02g000451	3.03683	4.02515	3.97298	6.47606	3.05072	3.64603	3.64385	2.99738
Capana02g000468	17.4345	10.439	14.9767	10.156	32.4026	56.3699	21.2552	34.7263
Capana02g000475	0.896936	0.718075	10.0173	7.7141	2.24948	11.3209	8.02347	9.45135
Capana02g000476	0.38759	10.3449	24.771	41.5836	27.0221	22.038	26.5147	33.2161
Capana02g000479	12.6313	10.0029	12.5055	10.435	20.5615	29.4576	19.9742	22.7899
Capana02g000489	58.4617	36.4953	73.2769	57.9077	175.3	70.0807	43.708	79.1853
Capana02g000493	0.0316203	0	0	0	0.253916	0.692412	0.0409295	0
Capana02g000496	4.56118	47.7627	78.5072	74.5099	61.4236	52.7304	61.1148	60.6429
Capana02g000510	38.7098	66.7575	34.9724	46.9577	43.109	37.2373	67.9599	42.407
Capana02g000520	23.6282	17.731	24.4046	18.2332	8.76591	14.7962	14.5975	23.8838
Capana02g000525	0.0149263	0	0.0144087	0	2.6662	5.4053	4.93498	5.25809
Capana02g000529	7.9033	4.90414	4.61766	1.85766	1.42883	2.34323	2.14905	1.05688
Capana02g000536	0.372248	0.112463	0.345302	0.189105	0	0.0456203	0.0490505	0.090847
Capana02g000540	10.4247	3.29638	3.27827	2.73299	2.23173	1.10233	1.16874	3.68651
Capana02g000563	1.61041	0.735212	0.793994	0	0.216099	0.245305	0.818437	0.180109
Capana02g000574	13.1805	12.0732	7.19878	10.6879	14.6366	10.4689	14.1404	9.15906
Capana02g000587	0	0	0	0.152742	0.028532	0	0.0190175	3.20452
Capana02g000588	7.40449	7.59361	5.12446	1.15222	2.4388	4.76354	1.72612	1.4388
Capana02g000592	4.29007	1.83191	4.39242	0.509242	1.58901	1.19887	3.95484	0.469995
Capana02g000611	30.838	40.5148	133.781	79.6825	101.014	224.215	132.75	74.2027
Capana02g000614	35.5047	4.60535	8.2416	1.98383	0.882632	1.35471	2.27621	0.799219
Capana02g000615	14.1382	6.51344	14.2827	1.25129	1.17379	4.09484	8.83446	9.45861
Capana02g000616	9.20569	0.520442	0.645239	0.366745	0.918026	2.73298	0.34099	15.7636
Capana02g000619	5.85633	10.4493	13.2801	20.1217	15.4375	7.48586	6.16902	11.5281
Capana02g000650	9.32303	15.7988	13.9417	10.7471	17.3146	17.394	16.3011	14.6252
Capana02g000652	5.04182	8.30649	7.59204	4.62521	6.634	8.8225	6.35361	11.7307
Capana02g000656	12.0678	49.9294	22.7259	0.0391867	21.4683	16.404	1.36034	0.0986117
Capana02g000664	1.47338	47.0262	107.526	2.22327	20.9166	41.817	14.6965	7.41937
Capana02g000666	25.569	26.3237	14.3048	131.568	7.24226	79.8365	9.92146	10.2876
Capana02g000675	12.3092	12.2147	16.2848	2.5736	12.4301	28.237	7.87906	14.7994
Capana02g000676	0	0.0104077	2.3368	0	0	0.245127	0.054438	0.0770273
Capana02g000685	26.1738	20.2827	5.71004	30.3257	2.83661	32.1563	4.33151	2.62792
Capana02g000690	1.25504	2.10029	2.12716	0.47006	2.08022	3.3289	1.90913	0.0883933
Capana02g000695	19.7128	35.4575	47.2941	104.364	34.0009	54.4002	49.9664	38.7255
Capana02g000700	19.8076	2.09989	9.69104	4.62096	0.809373	2.25822	4.24128	1.5419
Capana02g000721	3.09956	4.40244	2.84931	0.308958	6.32302	3.25285	2.04484	0.630932
Capana02g000725	6.58839	5.8765	6.62778	1.26271	13.8873	11.5804	10.9291	1.86289
Capana02g000737	18.9347	0.664458	1.81915	1.7374	1.05995	3.36722	2.54242	3.27462
Capana02g000741	9.4221	17.2175	19.3887	22.1681	9.39366	10.8029	9.30366	10.8415
Capana02g000742	11.7381	1.94875	1.54926	0.630618	0.0488905	0.203053	0.522344	0
Capana02g000748	12.2863	2.00305	2.85322	0.039635	1.32212	1.16662	0.947485	0.0911493
Capana02g000752	4.93644	4.89109	4.94933	3.14148	7.62255	6.75163	7.52624	6.81635
Capana02g000762	34.2579	35.569	62.0725	54.7681	25.2103	45.975	25.3909	59.6337
Capana02g000773	2.6043	3.50581	3.27398	5.65603	0.012505	0.027405	0.386782	0
Capana02g000779	0.0538727	0	0.094193	0	0.160726	0.486022	0.314947	0.248777
Capana02g000787	2.17783	2.67277	1.90591	0.672064	4.64207	3.88243	2.91064	1.53365
Capana02g000794	5.06786	0.269686	0.712001	0.22293	0.607364	0.492171	0.503721	0.269066
Capana02g000798	2.30707	3.36915	3.55047	5.04816	1.59064	2.21956	1.57606	1.85555
Capana02g000804	52.4253	53.4853	55.3828	16.2449	61.1456	54.9476	45.7466	143.041
Capana02g000806	19.1122	27.6644	22.7254	32.8521	49.9555	28.8556	27.2247	52.0391
Capana02g000816	2.47999	2.03564	0.827106	0.508576	0	0	0.0542895	0.019912
Capana02g000819	6.11109	10.4941	4.28042	7.38121	2.56396	1.67896	3.27972	2.36519
Capana02g000829	4.06807	0.00770967	0.656482	0.0105267	0.092239	0.161577	0.317342	0.05401
Capana02g000830	8.70884	7.35403	14.2384	10.2644	19.1553	13.8436	11.6331	4.17198
Capana02g000850	109.496	148.813	132.876	228.805	198.916	105.461	138.029	108.701
Capana02g000892	6.61926	3.25762	4.43377	0.703865	1.74988	2.01919	3.83757	1.18592
Capana02g000893	2.99851	3.48697	6.5582	1.55901	11.9912	10.6089	4.9093	5.04736
Capana02g000894	16.0963	18.5349	63.3505	29.3374	188.113	124.186	58.616	101.738
Capana02g000899	10.1973	2.05809	3.51488	0.105825	0	0	0.0976235	0.211759
Capana02g000904	0.220104	1.80599	3.35603	1.72406	4.07334	4.74054	2.4515	7.46638
Capana02g000917	2.65268	2.02487	4.93981	2.28721	5.87759	5.9682	6.26012	7.11227
Capana02g000938	12.3124	0.660739	1.9491	0.285002	0.470616	0.350581	3.3462	0.131777
Capana02g000940	18.1505	13.3922	9.92923	0.988201	72.0866	9.24809	32.0438	8.75871
Capana02g000969	7.12347	8.90602	22.2548	13.1089	7.79511	20.3127	11.2386	11.8028
Capana02g000983	18.4834	19.2626	11.1828	19.2457	11.1932	22.7478	3.43714	3.94262
Capana02g000984	6.22023	11.5171	14.0546	10.7177	15.9807	12.7939	23.9953	11.8054
Capana02g000986	0	0.069634	0	0.554947	2.90624	0.295321	0	704.817
Capana02g000995	0.326029	1.01639	29.356	125.927	1.15918	1.86188	6.29663	80.7698
Capana02g000997	2.98841	0.899533	0.636373	1.69535	2.88707	1.24308	0.65105	3.9321
Capana02g001003	4.50535	2.56948	3.94504	1.23957	1.26647	2.37707	1.84575	2.00125
Capana02g001004	34.3239	45.1952	61.2785	51.7788	25.9524	35.6207	26.8405	26.1625
Capana02g001005	0.518325	0.136265	0.0438767	0.109195	0.046131	0	0.026272	0.023317
Capana02g001012	25.4971	35.5993	65.3893	31.4442	17.7267	48.9499	67.1899	10.0282
Capana02g001014	11.7112	9.05955	10.0168	9.78868	4.73382	5.98774	4.95727	6.45794
Capana02g001015	20.3948	16.6663	14.8927	20.8958	24.2204	17.5011	16.6757	13.5847
Capana02g001016	62.1179	45.6751	65.8798	102.927	30.8967	35.7777	44.5545	44.3654
Capana02g001017	0.622373	0.615304	2.03301	1.05582	0.556836	1.1825	0.554296	0.549019
Capana02g001021	3.98781	5.89867	17.4562	8.29089	6.55897	10.767	5.36286	12.3488
Capana02g001026	9.62681	6.25612	4.97903	2.83698	3.1635	3.13148	6.77513	3.17002
Capana02g001028	6.95535	5.33853	7.21896	3.43173	2.85536	3.59047	5.82011	3.27242
Capana02g001031	23.7045	3.85801	11.0315	2.92424	11.3997	6.08147	6.39382	7.34417
Capana02g001033	11.7135	0.292701	0.36931	0	0.392416	0.931532	1.07771	0.0435943
Capana02g001036	4.17021	4.07236	2.5302	1.2396	1.43548	1.53095	1.24765	0.66312
Capana02g001037	2.15502	2.62035	1.61299	0.518474	1.42425	1.18992	1.67633	0.690372
Capana02g001040	0.738869	1.68251	2.0262	11.6798	18.7946	5.14226	7.82591	80.1675
Capana02g001046	3.96263	4.58842	4.3831	5.05978	0.70434	1.33369	0.874722	1.36491
Capana02g001049	22.3906	13.7769	14.4265	8.40785	4.77415	7.44641	5.69575	6.39669
Capana02g001051	14.3787	10.4963	12.2643	0.449029	14.6146	13.9166	10.3999	3.77233
Capana02g001064	2.13068	3.23958	3.81872	4.60342	1.16958	8.44916	2.56185	0.788567
Capana02g001066	0.935112	1.87504	2.44765	1.32927	0	0	0	0.077316
Capana02g001068	2.91851	3.11379	3.01295	4.05179	1.39148	3.38628	1.91493	1.75744
Capana02g001077	18.7839	24.9019	24.7167	41.8004	24.6616	21.0882	20.7856	10.3806
Capana02g001083	10.776	31.3113	207.252	16.262	6.27624	15.6435	6.2729	0.649338
Capana02g001084	14.8064	16.8584	22.7135	33.5622	24.6663	32.3523	22.5107	32.5768
Capana02g001089	0.0402153	0.078726	0.612837	35.204	0.046649	3.33368	0.141309	39.7925
Capana02g001090	0.390738	0.0251393	1.21099	81.4837	0.009857	7.70099	0.148378	45.8473
Capana02g001094	0.12359	0.0682143	0.632144	15.9415	0.0635655	0.437882	0.082707	2.29509
Capana02g001100	3.2458	1.90201	3.77287	2.67647	1.70182	4.83187	1.6515	3.34813
Capana02g001103	21.3257	7.60497	10.566	3.20467	3.32935	6.45173	7.86531	3.24297
Capana02g001108	41.5999	60.3945	96.3957	78.1693	104.127	74.124	59.8856	157.793
Capana02g001116	3.1547	6.51918	6.36071	4.66544	3.12986	3.38411	5.46854	3.62322
Capana02g001117	1.69419	2.28069	2.65376	6.85465	5.17149	2.60236	4.56088	6.25073
Capana02g001148	1.04002	2.46033	1.92912	0.450088	4.3939	3.74421	3.9035	1.1634
Capana02g001150	36.6956	9.98533	17.4329	6.21034	9.24014	11.5774	9.42022	8.81834
Capana02g001165	56.3375	100.113	70.8752	80.9393	15.6328	16.4206	11.5606	7.78935
Capana02g001185	3.29495	2.51429	1.71446	1.30584	4.20246	2.64611	1.51936	0.758914
Capana02g001186	5.89051	4.15093	2.17509	0.834787	14.2714	6.29541	3.35857	1.62757
Capana02g001193	5.6933	3.58929	1.099	0.0822063	0.505326	0.0725767	0.225431	0.0283367
Capana02g001197	18.6348	40.7514	51.5158	47.9513	43.6683	43.4106	39.5739	77.9829
Capana02g001200	1.36108	9.00559	11.04	14.7555	1.58408	4.29577	1.84072	6.5092
Capana02g001205	17.4151	16.3781	21.9643	17.25	3.81888	5.75048	7.56274	12.9325
Capana02g001207	9.87162	15.5416	12.9854	19.0404	0.869195	1.46343	2.39766	15.588
Capana02g001212	19.0177	17.0927	19.8577	15.3748	21.6249	18.8107	16.3871	26.0904
Capana02g001225	12.3545	0	0.017242	0	0.691104	3.29637	9.77844	0.053181
Capana02g001231	0	0.06021	0.617676	0	0.098474	0.0431537	0.351185	2.6411
Capana02g001235	5.1982	4.61385	4.79857	2.75586	2.01233	2.85411	2.74537	2.45203
Capana02g001239	48.0482	59.439	58.8811	43.1498	82.5571	90.2885	48.291	74.6803
Capana02g001241	14.9512	14.9613	9.70846	2.25759	18.7982	14.1183	13.5293	18.142
Capana02g001258	162.448	101.811	27.0802	14.0305	47.9911	35.5679	30.0373	12.709
Capana02g001268	0.041705	0.0362773	0	0.0229507	0.37313	0.408567	0.763726	0.502046
Capana02g001274	291.575	675.781	576.29	832.46	641.776	604.012	392.121	754.743
Capana02g001283	19.1918	10.6371	12.7353	10.4618	6.12774	8.39552	9.14047	9.76611
Capana02g001288	35.3269	39.6107	104.361	48.2464	107.46	172.722	78.7878	153.613
Capana02g001292	0.0354797	0	0.0138377	28.0588	1.24722	1.24008	0.60034	24.4456
Capana02g001293	0.533174	0	0.0229117	0	0	0	0.295898	3.16512
Capana02g001297	4.00416	4.72205	8.40517	13.0216	6.79108	8.77697	11.0182	12.8824
Capana02g001300	10.6059	1.61825	1.2072	0.0330907	1.741	2.18287	0.525579	0.803239
Capana02g001305	17.3892	24.3221	31.5887	8.91817	7.88556	14.8581	8.27557	11.7492
Capana02g001311	3.7408	0.846903	2.73851	0.636011	0	0.716066	3.94838	0.535258
Capana02g001313	0.687771	1.68487	14.8382	87.4287	13.7485	14.9691	41.5632	80.5655
Capana02g001318	46.3404	61.4633	64.8697	87.7436	84.0445	65.8838	77.9154	51.7341
Capana02g001319	0.629031	1.13346	6.87802	0.939048	2.05761	5.12561	11.7825	1.64532
Capana02g001321	106.62	94.7528	180.424	92.0904	364.546	257.775	246.529	46.3311
Capana02g001322	60.4958	39.7702	11.9911	8.87281	2.75539	1.39176	1.15377	0
Capana02g001326	0.957673	1.47109	36.3097	0.0168123	0.568795	0.483652	42.4262	0.53816
Capana02g001335	40.998	24.8435	25.3717	40.2146	7.57025	19.4455	22.7003	21.862
Capana02g001342	15.2242	10.3711	9.90452	0.546048	4.58688	4.31179	4.42986	0.882876
Capana02g001347	16.6057	4.50053	5.81726	0.848095	2.35412	2.53991	5.76934	2.35557
Capana02g001351	15.1383	11.4287	8.03886	4.43711	4.91919	7.73159	8.41742	0.958234
Capana02g001352	5.20788	5.32091	1.93194	0.0261203	4.88275	1.29689	1.09529	0.128067
Capana02g001359	2.14725	0.752345	1.05526	1.80661	0.211058	0.460722	0.250153	1.15053
Capana02g001366	20.0691	7.2365	2.88424	0.048817	2.36609	1.76051	11.2831	0.528708
Capana02g001367	27.0704	23.1891	22.4066	18.1726	6.63954	7.42978	7.22929	4.70026
Capana02g001374	5.1812	2.6318	8.20647	0.561015	5.41919	6.03945	7.78509	7.01751
Capana02g001381	7.21684	8.18709	13.2184	5.844	20.3954	4.86123	3.87736	24.4103
Capana02g001382	6.99943	4.09509	3.65963	17.6307	4.59975	12.1496	5.36052	4.79113
Capana02g001389	2.12016	0.569961	1.6276	0.488839	1.79665	1.62683	0.946723	0.861331
Capana02g001393	0	0	0	0.0292963	0	0	0.031714	1.2112
Capana02g001394	3.72295	1.04843	2.12616	1.50703	2.17092	2.85982	2.86037	1.13471
Capana02g001395	17.1864	33.1395	45.5111	21.3918	33.3916	43.5987	29.0866	29.282
Capana02g001399	24.5088	6.73963	3.73395	0.046063	1.47125	1.77894	4.29963	0.122085
Capana02g001400	1.6564	2.53182	3.13306	2.92823	3.27398	3.53286	2.65055	3.56059
Capana02g001401	0.103736	0.244831	0.356272	0.578703	0.159954	0.247689	0.0624745	1.00617
Capana02g001404	1.64208	2.27092	2.86266	2.28993	0.817779	0.990085	0.77872	0.993996
Capana02g001408	3.96122	3.51839	1.21906	0.484234	0.761557	6.70219	0.784854	0.210009
Capana02g001421	2.01148	0.379072	0.151491	0.203321	0	0	0	0.191132
Capana02g001423	0.064578	0.021626	0.0109783	0.199928	26.7319	0.677141	0.180421	60.2106
Capana02g001424	1.67488	0.418717	0.529599	0.554277	0.267096	0.188647	0.218193	5.66218
Capana02g001426	23.2473	1.11249	3.49848	2.27487	0.571446	1.01677	1.24396	1.74527
Capana02g001428	21.8449	40.4443	40.8861	33.8859	36.0191	38.3991	39.7442	36.5712
Capana02g001432	39.2735	25.4821	27.6479	16.3677	8.6062	13.5802	13.2616	18.3257
Capana02g001434	0.662085	0.249896	1.85319	22.6074	0.377718	0.701562	2.36569	34.4094
Capana02g001435	6.97695	2.51632	4.26987	2.02917	1.46732	3.30154	1.8812	2.22966
Capana02g001437	5.867	7.87988	6.64297	5.78982	2.42871	6.40232	3.35134	2.14715
Capana02g001439	7.91363	7.68275	8.93934	5.61851	2.8642	2.57816	3.06002	3.61117
Capana02g001446	7.87981	10.8363	9.91882	6.90565	14.2709	11.3913	10.2635	8.50296
Capana02g001450	1.85989	0.0604767	0.029777	0	0	0.0690127	0.05065	0
Capana02g001452	16.984	26.7634	23.9062	42.3991	20.6202	21.1191	18.6366	11.0078
Capana02g001465	1.84003	0.0534827	0.139651	0	0.0167365	0.0866383	0.197044	0.488629
Capana02g001466	41.1005	49.9899	35.3414	4.64639	33.7596	34.7827	38.5528	10.3796
Capana02g001485	0.206729	0.004886	0.0423167	4.32404	0.700994	0.127531	0.113187	10.2317
Capana02g001489	1.76332	1.70863	1.36186	0.553263	1.20344	1.88629	1.54455	1.67869
Capana02g001490	0.168732	1.09966	8.84061	27.935	12.5885	4.86074	13.3245	13.2936
Capana02g001491	6.01033	7.62929	12.5183	6.56964	2.05691	1.86357	2.43855	2.0169
Capana02g001496	23.7996	34.8305	58.2001	27.6148	24.1135	33.9703	21.5847	39.6361
Capana02g001498	4.74003	6.69417	7.16083	10.6765	29.7482	5.55255	7.45689	18.2073
Capana02g001501	3.80053	9.31224	10.7308	6.5472	5.33612	11.5041	33.9143	13.9853
Capana02g001505	134.738	9.51565	15.9609	0.472201	1.28783	2.16119	6.62527	0.807066
Capana02g001506	4.98199	4.46304	4.17734	0.110908	2.04239	2.96419	1.10811	0.421339
Capana02g001507	33.2107	114.773	108.344	131.949	91.1094	94.2783	95.8284	108.9
Capana02g001510	0.431413	0.979864	2.46076	1.84839	0	0	0	0.044815
Capana02g001513	2.37748	1.95514	1.59474	1.57844	2.60502	1.82866	5.83826	4.08791
Capana02g001514	24.4559	27.111	25.0133	4.52009	3.96961	6.29175	3.3786	1.15468
Capana02g001517	2.36353	3.45459	2.90513	3.23947	0.246266	0.0877467	0.134312	0.160775
Capana02g001524	9.71088	10.2078	9.24739	2.78466	9.50681	13.5906	7.31157	6.92584
Capana02g001531	7.83375	13.5788	21.087	10.8555	16.3821	21.2723	11.5836	11.3999
Capana02g001535	0.733955	0.841621	0.680665	0.229209	0.350384	0.242	0.308875	0.247562
Capana02g001542	2.83204	0.734063	1.27978	0	0.925961	0.156984	0.976205	0.121588
Capana02g001543	0.964281	0.306644	1.1968	0.071363	0.293158	0.224631	2.13842	1.27456
Capana02g001545	0.78716	0	0.787433	0	0.108317	0.0797797	1.40021	0.0652153
Capana02g001549	1.65851	0.072571	1.67368	0.079352	0.104423	0.0664047	1.70984	0.382059
Capana02g001556	98.5236	91.1712	103.785	55.9056	126.03	128.81	231.717	50.0913
Capana02g001557	31.6999	7.18662	5.11451	0.206381	1.87049	10.0909	0.754328	0.305383
Capana02g001558	10.7833	7.35085	7.60918	12.8527	27.0427	18.7754	14.5052	10.0058
Capana02g001564	24.9376	23.959	15.4006	3.31396	7.20054	9.72798	7.74292	5.08951
Capana02g001565	12.1914	13.3928	8.54849	0	7.02389	11.6645	8.31302	0.733338
Capana02g001566	1.33766	0.542834	1.72701	4.31091	4.67415	7.72583	4.03913	4.70921
Capana02g001572	30.6196	18.3941	16.4874	8.99229	7.48324	9.87779	8.0503	8.70386
Capana02g001577	4.30269	3.95309	6.33112	7.41369	3.11973	4.24514	2.94665	2.66534
Capana02g001578	66.3818	76.7201	38.2566	112.496	206.044	58.1531	91.4691	56.6201
Capana02g001579	9.949	0.622183	0.230317	1.32219	0.681415	3.34522	0.313331	3.97613
Capana02g001582	12.2093	19.4041	33.4457	26.4868	19.071	30.608	22.322	27.2169
Capana02g001583	0.0685307	0	0	1.38693	0	0	0	0.231769
Capana02g001584	14.4127	9.23269	7.98233	2.82378	3.48212	4.3164	1.84479	1.33385
Capana02g001585	20.3292	28.5326	29.2798	37.5138	34.0873	31.7122	48.2221	45.1403
Capana02g001587	6.34225	9.18526	8.75119	14.2727	12.9998	10.3703	11.4318	8.60771
Capana02g001590	7.98344	0.386284	0.283354	0.0340223	0.315055	0.193587	0.30133	0.0592887
Capana02g001595	0.534924	0.911448	0.605985	1.59139	0.0287815	0.0643783	0.262637	0.316262
Capana02g001602	4.43388	1.25562	1.20381	0.204912	1.00573	0.813905	1.31268	2.23524
Capana02g001614	0.00180567	0.050174	0.145267	0.031048	0.02564	1.74748	0.193364	0.458189
Capana02g001615	0.0877717	0	0.139903	0.0515393	10.5881	8.6619	2.3027	5.62038
Capana02g001625	23.5394	41.6345	23.7502	51.7577	16.7278	18.0025	12.7277	14.124
Capana02g001626	0.369843	0.435641	0.462157	1.54409	0.0190785	0.0243977	0.0129425	0.053293
Capana02g001630	2.84097	2.53073	1.49937	0	2.66908	1.28321	0.846942	0.389876
Capana02g001631	9.23761	17.0059	15.231	7.32366	18.344	19.3988	18.0863	17.853
Capana02g001634	0.05442	0	0	2.13184	21.4782	4.16698	2.32507	5.8042
Capana02g001635	0.163776	1.7458	6.63782	16.8063	34.6814	31.9349	16.6866	41.8838
Capana02g001637	32.6958	112.685	58.4544	21.6214	115.351	63.24	41.0783	12.0812
Capana02g001642	0.101867	0.0315453	0.220951	1.25787	2.93409	7.15289	1.44761	2.24471
Capana02g001644	7.43286	5.5212	2.76624	0	1.72904	3.0767	0.801394	0.0738327
Capana02g001645	17.9666	47.9427	42.9929	70.4408	107.447	47.7601	45.9913	76.4683
Capana02g001649	20.6999	9.38043	12.1562	17.3374	8.83258	14.3946	5.82513	4.66047
Capana02g001650	31.4542	14.8187	8.892	0.152993	5.26763	11.2126	12.4311	2.00194
Capana02g001651	221.82	165.271	199.326	208.691	199.389	256.638	313.937	473.998
Capana02g001657	8.23783	5.26695	5.8191	0.769843	2.90571	4.84003	3.20782	2.12398
Capana02g001658	8.51162	12.7815	13.438	44.3612	8.46523	26.4802	7.65151	26.3848
Capana02g001664	3.49095	4.00691	5.31554	4.35942	3.62952	4.8883	2.95206	3.14284
Capana02g001665	6.18689	7.9223	7.51177	16.3439	11.2055	17.6903	16.3712	8.47274
Capana02g001666	12.2924	13.6355	17.2657	14.3079	13.8915	35.0316	17.0912	21.3791
Capana02g001669	0	0.0942393	0	0.0611817	1.78278	2.27456	0.033185	0.400924
Capana02g001676	4.41007	3.91777	2.82796	1.55798	9.19352	4.27099	3.46756	5.83987
Capana02g001677	10.3879	8.20736	8.12707	2.35091	3.48628	9.09944	3.62231	2.91994
Capana02g001679	4.41679	4.25556	2.81601	0.804673	15.831	5.02503	6.75557	1.35445
Capana02g001684	22.2596	2.23034	2.06788	2.28263	5.226	10.502	4.03812	0.424602
Capana02g001687	1.58296	1.04936	0.34559	0.0418917	1.07037	1.8411	0.751792	0.0496517
Capana02g001688	0.284649	0.555278	0.534904	0.138937	0.0540365	0	0.749534	0.0293817
Capana02g001689	8.4177	7.52056	7.10591	37.0285	4.15709	13.2032	3.81867	9.29297
Capana02g001690	1.31619	0.343772	17.675	0.348757	1.22938	0.362365	30.5632	30.0882
Capana02g001696	11.963	1.99903	0.091904	0	26.734	1.38528	3.60972	0.0711013
Capana02g001706	1.49672	2.24012	6.50208	31.4243	10.1188	17.0201	7.62605	13.8268
Capana02g001708	15.0392	4.0249	5.09544	0.496251	0.450346	1.3135	1.29088	0.0790937
Capana02g001709	2.16713	0.667232	0.986441	0.139231	2.17048	4.47063	1.32865	0.0281647
Capana02g001710	0.038917	0.155657	0.282313	0.348128	1.36233	2.65502	1.16812	1.41774
Capana02g001716	8.11403	15.1387	1.55221	0.253569	2.66222	0.92672	0.188995	0.0736467
Capana02g001725	0	0.162691	0.949821	0.0855297	7.02541	0.517521	0.654093	1.69241
Capana02g001733	0.020118	0.0407757	3.19205	0.209226	0.796898	0.695007	3.381	0.786386
Capana02g001734	0.907165	0.917983	0.709044	0.827311	5.45187	1.01645	1.88521	3.39836
Capana02g001736	3.83604	6.55064	12.6643	1.06857	47.1945	95.5677	50.3693	1.59212
Capana02g001743	10.5734	4.51852	3.32741	2.78966	2.09794	2.44902	1.90271	1.16679
Capana02g001744	0.157371	0.044517	0.0187997	0	0.457852	0.365607	0.239027	0.570239
Capana02g001745	7.92248	3.79311	19.3745	27.7856	1.86937	2.19657	2.8659	55.8414
Capana02g001754	32.3025	16.5191	3.07585	0.028163	4.5779	13.5846	9.51583	0.343733
Capana02g001758	0.765914	0.502741	0.707362	0.903975	0.577731	0.778851	0.885942	0.596627
Capana02g001759	9.62837	9.87152	9.44816	11.4741	12.6739	13.5383	14.6942	12.6825
Capana02g001767	75.8319	41.1178	17.8712	10.8772	16.3531	24.3311	15.7563	8.94477
Capana02g001775	6.66228	11.9028	5.43629	11.2557	12.6148	7.99773	11.9128	15.834
Capana02g001783	6.41481	5.53159	15.8319	4.8537	3.22324	7.6327	4.73718	0.903438
Capana02g001785	5.02134	6.82853	6.15937	4.03268	5.0728	5.78292	4.66302	3.4838
Capana02g001802	3.91196	0.600464	0.861578	0.793133	41.1773	29.5818	3.37657	9.36784
Capana02g001804	30.0909	21.4553	3.77577	0.78008	6.0023	11.7945	10.5196	0.310751
Capana02g001806	6.15577	2.54862	1.06973	0.0368963	5.12004	3.31983	4.80524	0.512419
Capana02g001807	29.6891	9.98923	14.8299	1.33475	2.32226	3.89925	7.25716	0.262431
Capana02g001812	4.37582	1.26005	0.855315	0.798684	3.25377	2.78309	1.49533	2.0109
Capana02g001816	63.7874	56.3211	67.4098	11.961	13.3746	19.3564	23.8587	5.37934
Capana02g001818	0.705727	2.85971	5.10699	3.1473	1.63707	2.85554	1.75579	3.14965
Capana02g001824	18.7318	18.3643	18.0321	24.0212	9.67311	16.864	14.2674	9.01733
Capana02g001829	3.0067	0.0521643	0.343958	0.170641	0.250082	0.0295453	0.023313	0.0434953
Capana02g001832	1.85369	1.23724	0.552897	0.191443	0.0288055	0.277688	0.23755	0.0711463
Capana02g001833	28.729	1.2289	0.545991	0.923639	1.26281	0.460234	0.319898	0
Capana02g001838	60.11	71.4803	22.3384	0.114504	12.947	3.66078	0.659458	0.256422
Capana02g001839	12.6863	14.3491	20.3391	9.53311	5.25541	9.64758	6.38202	4.13187
Capana02g001844	2.50162	0.822202	0.339443	0.024409	0.720498	0.904592	0.444871	0.0125283
Capana02g001847	26.6935	24.2884	28.3117	2.99756	17.9282	43.6635	23.035	6.35991
Capana02g001854	0	0	4.56198	0	0.172872	0	4.10421	0.282443
Capana02g001858	70.6839	85.1426	98.6387	80.7449	144.772	186.244	116.851	121.625
Capana02g001859	1.56287	0.536433	0.227967	0.285713	0.294362	0.08881	0.045264	0.157479
Capana02g001867	11.6883	6.84815	4.99787	6.12197	3.07905	6.35919	3.85865	5.06535
Capana02g001869	1.38215	1.10431	2.00651	0.390597	3.2974	0.818507	1.45373	4.23592
Capana02g001895	13.159	19.4665	24.6901	28.4846	26.0493	16.1999	15.9446	26.5414
Capana02g001897	1.88442	3.30347	2.51907	7.93391	3.08264	6.72211	2.50233	6.21038
Capana02g001917	128.17	112.537	64.0766	18.4075	44.3482	60.8916	56.4774	3.45798
Capana02g001918	8.26178	1.72133	1.73556	0.261578	2.17149	1.09716	1.29406	0.850262
Capana02g001926	0.091859	0.177483	167.715	0.635764	2.25945	0.804271	132.59	83.6117
Capana02g001927	0.334628	0.047985	38.3754	0	0.857517	0.288128	36.0541	35.219
Capana02g001934	27.0541	24.0781	26.4649	46.838	20.1413	33.918	23.2666	23.1156
Capana02g001935	1476.34	219.942	23.7265	0.09917	21.3047	1.73319	33.7037	0.0351933
Capana02g001950	13.3245	6.63904	6.76487	2.72071	13.703	13.8294	6.21189	1.91668
Capana02g001951	88.4434	85.9883	101.792	3.24642	223.174	247.85	65.5349	11.2381
Capana02g001960	14.8692	1.74295	2.5591	0.302688	0.995315	1.3449	3.71569	0.530294
Capana02g001962	22.166	21.6899	36.0027	21.7886	24.4421	53.2438	29.7202	27.5189
Capana02g001963	4.66465	2.95618	4.13417	2.29186	4.17049	6.72215	3.55587	4.08596
Capana02g001966	38.0067	137.443	86.2031	338.877	108.639	86.0968	257.028	132.962
Capana02g001970	31.3407	17.8611	18.3093	6.5201	10.6432	13.0882	21.8535	10.453
Capana02g001973	53.0381	93.1611	128.825	75.7671	85.236	91.5203	95.5601	93.4198
Capana02g001976	36.1163	42.1979	71.9012	28.7987	31.5579	50.1722	29.1916	48.7027
[truncated: 5,949 more rows]

## Sheet: capsaicinoid
Table S7.2
Sample	Capsaicin	dihydrocapsaicin	Phenethylamine	Vanillin	L-Valine	p-Coumaricacid
B-1	9	2445	7800000	1.91667e+06	9.65667e+06	1.93333e+07
B-2	63800	55600	5.68333e+06	3.68667e+06	2.35667e+07	3.24667e+06
B-3	76700	124550	5.39333e+06	996667	3.52333e+07	1146000
B-5	5980	12925	2.39667e+07	378667	2.89333e+07	429667
C-1	4530000	9.37808e+06	14600000	2990000	15700000	2.26667e+06
C-2	4.54667e+06	9450000	25200000	5090000	1.90333e+07	2350000
C-3	7910000	1.66333e+07	21500000	2.10333e+06	1.66333e+07	978000
C-5	7.69667e+06	1.51333e+07	1.71667e+07	410000	31700000	319333
Note：The metabolite values of three biological replicates are averaged
