# Supplementary material for: Integrative Analysis of the Metabolome and Transcriptome of a Cultivated Pepper and Its Wild Progenitor Chiltepin (Capsicum annuum L. var. glabriusculum) Revealed the Loss of Pungency During Capsicum Domestication
Source: Front Plant Sci. 2022 Jan 5;12:783496. doi: 10.3389/fpls.2021.783496 (PMC8767146; doi:10.3389/fpls.2021.783496)
Supplement: Supplementary file 8 [file Table_8.XLSX]

## Sheet: Sheet1
Supplementary Table S8. These DEGs clustered into 26 major tree branches
blue		brown		cyan		darkgreen		darkmagenta		darkolivegreen		darkorange		darkred		green		green yellow		grey60		lightcyan		orange		orangered4		pink		plum1		purple		royalblue		saddlebrown		sienna3		skyblue		steelblue		turquoise		white		yellow green
Capana00g000118		Capana00g000196		Capana00g000198		Capana00g000179		Capana00g000071		Capana00g000918		Capana00g000088		Capana00g000571		Capana00g000446		Capana00g000268		Capana00g000258		Capana00g000035		Capana00g000665		Capana00g001922		Capana00g000219		Capana00g000453		Capana00g000255		Capana00g000508		Capana00g001151		Capana00g003863		Capana00g000937		Capana00g000596		Capana00g000010		Capana00g000229		Capana00g000323
Capana00g000151		Capana00g000236		Capana00g000315		Capana00g000197		Capana00g000290		Capana00g001613		Capana00g001365		Capana00g000668		Capana00g000620		Capana00g000396		Capana00g000293		Capana00g000110		Capana00g000726		Capana00g003130		Capana00g000901		Capana00g002157		Capana00g000400		Capana00g001392		Capana00g001861		Capana00g004055		Capana00g001027		Capana00g000995		Capana00g000038		Capana00g000909		Capana00g001370
Capana00g000163		Capana00g000304		Capana00g000555		Capana00g000298		Capana00g000305		Capana00g001614		Capana00g002533		Capana00g000845		Capana00g000656		Capana00g000507		Capana00g000320		Capana00g000246		Capana00g001699		Capana00g004111		Capana00g000985		Capana00g002797		Capana00g000653		Capana00g003163		Capana00g002742		Capana00g004475		Capana00g001488		Capana00g001034		Capana00g000075		Capana00g001087		Capana00g002267
Capana00g000284		Capana00g000346		Capana00g001028		Capana00g000347		Capana00g000539		Capana00g003789		Capana00g002537		Capana00g000984		Capana00g001163		Capana00g000626		Capana00g000498		Capana00g000316		Capana00g001883		Capana01g000752		Capana00g001738		Capana00g004374		Capana00g001353		Capana00g003453		Capana00g003683		Capana01g001017		Capana00g001635		Capana00g002541		Capana00g000136		Capana00g001305		Capana00g003107
Capana00g000424		Capana00g000469		Capana00g001054		Capana00g000353		Capana00g000566		Capana00g004209		Capana00g002636		Capana00g001069		Capana00g001202		Capana00g000688		Capana00g000499		Capana00g000500		Capana00g002490		Capana01g002760		Capana00g002014		Capana01g000250		Capana00g002289		Capana00g003598		Capana00g003932		Capana01g001290		Capana00g002015		Capana00g003809		Capana00g000156		Capana00g002628		Capana01g000343
Capana00g000455		Capana00g000533		Capana00g001271		Capana00g000362		Capana00g000602		Capana00g004707		Capana00g003300		Capana00g001079		Capana00g001203		Capana00g000736		Capana00g000873		Capana00g000926		Capana00g002648		Capana01g003292		Capana00g002264		Capana01g000534		Capana00g002899		Capana00g003970		Capana00g004168		Capana01g002588		Capana00g003406		Capana00g004010		Capana00g000183		Capana00g003083		Capana01g000728
Capana00g000458		Capana00g000573		Capana00g001507		Capana00g000373		Capana00g000625		Capana01g000079		Capana00g004714		Capana00g001703		Capana00g001372		Capana00g000942		Capana00g000880		Capana00g000938		Capana00g004637		Capana02g000114		Capana00g002788		Capana01g000666		Capana00g003643		Capana00g004673		Capana00g004377		Capana01g004450		Capana00g004021		Capana01g000038		Capana00g000222		Capana00g003256		Capana01g002706
Capana00g000476		Capana00g000580		Capana00g001625		Capana00g000490		Capana00g000951		Capana01g000195		Capana01g000644		Capana00g001893		Capana00g001482		Capana00g001178		Capana00g001017		Capana00g001228		Capana01g000731		Capana02g000420		Capana00g002897		Capana01g001577		Capana00g003774		Capana00g004988		Capana00g004668		Capana02g000615		Capana00g004184		Capana01g002396		Capana00g000301		Capana00g003858		Capana01g002777
Capana00g000627		Capana00g000648		Capana00g001827		Capana00g000512		Capana00g000961		Capana01g000858		Capana01g000680		Capana00g001972		Capana00g001776		Capana00g001257		Capana00g001159		Capana00g001263		Capana01g000742		Capana02g001637		Capana00g002920		Capana01g003049		Capana00g003817		Capana01g000179		Capana00g004807		Capana02g001028		Capana00g004443		Capana01g002516		Capana00g000395		Capana00g004194		Capana01g003246
Capana00g000790		Capana00g000664		Capana00g001863		Capana00g000894		Capana00g001022		Capana01g000864		Capana01g001108		Capana00g002208		Capana00g001881		Capana00g001331		Capana00g001417		Capana00g001619		Capana01g000743		Capana02g002685		Capana00g002981		Capana01g004493		Capana00g003839		Capana01g000308		Capana00g004900		Capana02g002059		Capana00g004456		Capana01g003240		Capana00g000428		Capana00g004263		Capana02g000317
Capana00g000791		Capana00g000934		Capana00g001964		Capana00g000953		Capana00g001061		Capana01g000881		Capana01g001115		Capana00g002392		Capana00g001936		Capana00g001550		Capana00g001512		Capana00g001880		Capana01g000809		Capana03g001469		Capana00g003144		Capana02g001185		Capana00g003949		Capana01g000401		Capana00g004976		Capana02g002421		Capana01g000194		Capana01g003669		Capana00g000441		Capana00g004508		Capana02g001374
Capana00g000874		Capana00g001023		Capana00g001980		Capana00g001041		Capana00g001071		Capana01g001408		Capana01g001121		Capana00g002531		Capana00g001969		Capana00g001695		Capana00g001632		Capana00g001985		Capana01g000872		Capana03g001556		Capana00g003767		Capana02g002781		Capana00g004587		Capana01g000949		Capana00g005030		Capana02g002743		Capana01g000732		Capana01g004464		Capana00g000445		Capana00g004735		Capana02g001690
Capana00g001030		Capana00g001167		Capana00g002368		Capana00g001042		Capana00g001094		Capana01g001688		Capana01g001154		Capana00g002544		Capana00g002100		Capana00g002391		Capana00g001879		Capana00g002001		Capana01g001359		Capana04g001485		Capana00g003783		Capana02g003323		Capana00g004694		Capana01g001351		Capana01g000020		Capana02g002763		Capana01g001807		Capana02g000592		Capana00g000510		Capana01g000353		Capana02g001927
Capana00g001206		Capana00g001256		Capana00g002620		Capana00g001044		Capana00g001173		Capana01g002222		Capana01g001387		Capana00g002782		Capana00g002200		Capana00g002483		Capana00g002318		Capana00g002182		Capana01g002409		Capana04g002555		Capana00g003816		Capana03g001146		Capana00g004709		Capana01g001372		Capana01g001110		Capana02g003178		Capana01g002517		Capana02g001225		Capana00g000586		Capana01g000691		Capana02g002324
Capana00g001238		Capana00g001277		Capana00g002725		Capana00g001423		Capana00g001225		Capana01g002526		Capana01g001612		Capana00g002843		Capana00g002284		Capana00g002619		Capana00g002389		Capana00g002538		Capana01g003244		Capana04g002570		Capana00g003939		Capana03g003626		Capana01g000073		Capana01g001400		Capana01g001131		Capana03g000849		Capana01g002566		Capana02g001311		Capana00g000679		Capana01g000795		Capana02g003006
Capana00g001596		Capana00g001390		Capana00g002732		Capana00g001522		Capana00g001226		Capana01g003176		Capana01g002433		Capana00g003000		Capana00g002588		Capana00g002623		Capana00g002653		Capana00g002539		Capana01g004124		Capana05g001383		Capana00g004584		Capana04g000129		Capana01g000166		Capana01g001464		Capana01g001213		Capana03g002005		Capana01g002608		Capana02g001545		Capana00g000681		Capana01g001678		Capana03g000130
Capana00g001638		Capana00g001724		Capana00g002777		Capana00g001532		Capana00g001374		Capana01g003288		Capana01g002769		Capana00g003275		Capana00g002708		Capana00g002626		Capana00g002902		Capana00g002564		Capana02g000442		Capana05g001741		Capana00g004617		Capana04g001501		Capana01g000225		Capana01g002083		Capana01g002097		Capana03g002043		Capana01g003444		Capana02g001549		Capana00g000702		Capana01g002674		Capana03g000171
Capana00g001662		Capana00g001779		Capana00g002887		Capana00g001538		Capana00g001393		Capana01g003359		Capana01g003167		Capana00g003846		Capana00g002763		Capana00g002629		Capana00g003241		Capana00g002724		Capana02g001051		Capana05g001834		Capana00g004993		Capana04g001637		Capana01g000423		Capana01g002103		Capana01g002503		Capana03g002111		Capana01g003816		Capana02g003108		Capana00g000716		Capana01g003399		Capana03g000742
Capana00g001833		Capana00g001794		Capana00g002895		Capana00g001607		Capana00g001475		Capana01g003482		Capana01g003637		Capana00g003982		Capana00g003957		Capana00g002633		Capana00g003418		Capana00g002729		Capana02g001408		Capana06g000535		Capana00g005089		Capana04g001650		Capana01g000491		Capana01g002193		Capana01g003304		Capana03g002435		Capana01g004097		Capana02g003271		Capana00g000724		Capana01g004361		Capana03g001359
Capana00g001918		Capana00g002008		Capana00g002901		Capana00g001620		Capana00g001489		Capana02g000161		Capana01g003695		Capana00g004257		Capana00g003963		Capana00g002634		Capana00g003511	CCoAOMT-P5	Capana00g002792		Capana02g001489		Capana06g000933		Capana00g005103		Capana04g002688		Capana01g000668		Capana01g002884		Capana01g004255		Capana03g003236		Capana01g004338		Capana02g003284		Capana00g000734		Capana02g001665		Capana03g001567
Capana00g001942		Capana00g002134		Capana00g002921		Capana00g001718		Capana00g001506		Capana02g001677		Capana01g003981		Capana00g004646		Capana00g004092		Capana00g002726		Capana00g003597		Capana00g002802		Capana02g001524		Capana06g001647		Capana01g000069		Capana05g002185		Capana01g001505		Capana01g002999		Capana02g000741		Capana03g003620		Capana02g000690		Capana02g003394		Capana00g000842		Capana02g001897		Capana03g002092
Capana00g001983		Capana00g002189		Capana00g002990		Capana00g001814		Capana00g001605		Capana02g002022		Capana01g004121		Capana00g004677		Capana00g004382		Capana00g002764		Capana00g003600		Capana00g002881		Capana02g001687		Capana06g002968		Capana01g000198		Capana06g000112		Capana01g002530		Capana01g003333		Capana02g000762		Capana03g004098		Capana02g001395		Capana03g000454		Capana00g000857		Capana02g002034		Capana03g004346
Capana00g002089		Capana00g002492		Capana00g003023		Capana00g002031		Capana00g001746		Capana02g002368		Capana01g004371		Capana01g000078		Capana00g004585		Capana00g002945		Capana00g003686		Capana00g003111		Capana02g001847		Capana07g001261		Capana01g000248		Capana06g000728		Capana01g002551		Capana01g003639		Capana02g000798		Capana03g004227		Capana02g001531		Capana03g000477		Capana00g000923		Capana02g002115		Capana04g000258
Capana00g002117		Capana00g002493		Capana00g003085		Capana00g002400		Capana00g001767		Capana02g002588		Capana01g004456		Capana01g000217		Capana00g004724		Capana00g002967		Capana00g004088		Capana00g003129		Capana02g001950		Capana07g002261		Capana01g000494		Capana06g001071		Capana01g002590		Capana01g003704		Capana02g001200		Capana03g004251		Capana02g002385		Capana03g000970		Capana00g000979		Capana02g002396		Capana04g000287
Capana00g002160		Capana00g002532		Capana00g003179		Capana00g002499		Capana00g001896		Capana02g002983		Capana02g000489		Capana01g000249		Capana00g004736		Capana00g003094		Capana00g004100		Capana00g003194		Capana02g002295		Capana08g000899		Capana01g000705		Capana06g001222		Capana01g002736		Capana02g000475		Capana02g001510		Capana04g000656		Capana02g002906		Capana03g001035		Capana00g001150		Capana02g002424		Capana04g002370
Capana00g002265		Capana00g002739		Capana00g003266		Capana00g002558		Capana00g001919		Capana03g000047		Capana02g000806		Capana01g000411		Capana00g004831		Capana00g003208		Capana00g004116		Capana00g003391		Capana02g002596		Capana08g001015		Capana01g000922		Capana06g001785		Capana01g003180		Capana02g000496		Capana02g001577		Capana04g000657		Capana02g003148		Capana03g001109		Capana00g001172		Capana02g002507		Capana05g000127
Capana00g002305		Capana00g002745		Capana00g003270		Capana00g002600		Capana00g001974		Capana03g002189		Capana02g001241		Capana01g000509		Capana00g004895		Capana00g003380		Capana00g004182		Capana00g003405		Capana02g002736		Capana08g001692		Capana01g000961		Capana07g000817		Capana01g003198		Capana02g000969		Capana02g002076		Capana04g002550		Capana02g003186		Capana03g001194		Capana00g001230		Capana02g002810		Capana05g001703
Capana00g002320		Capana00g002765		Capana00g003273		Capana00g002622		Capana00g001990		Capana03g003352		Capana02g001381		Capana01g000697		Capana01g000041		Capana00g003384		Capana00g004264		Capana00g003603		Capana02g003110		Capana08g001909		Capana01g001066		Capana07g000990		Capana01g003238		Capana02g001021		Capana02g002104		Capana05g000090		Capana02g003485		Capana03g001380		Capana00g001272		Capana02g003135		Capana06g000204
Capana00g002502		Capana00g002879		Capana00g003322		Capana00g002647		Capana00g002241		Capana03g004091		Capana02g001498		Capana01g000711		Capana01g000109		Capana00g003385		Capana00g004414		Capana00g003685		Capana02g003350		Capana08g002697		Capana01g001352		Capana08g000942		Capana01g003289		Capana02g001428		Capana02g002727		Capana05g000818		Capana02g003682		Capana03g001400		Capana00g001338		Capana02g003546		Capana06g000303
Capana00g002827		Capana00g003014		Capana00g003377		Capana00g003079		Capana00g002242		Capana03g004264		Capana02g001645		Capana01g000806		Capana01g000120		Capana00g003596		Capana00g004471		Capana00g003850		Capana02g003390		Capana09g001456		Capana01g001676		Capana08g000947		Capana01g003313		Capana02g001507		Capana02g002737		Capana05g002081		Capana03g000269		Capana03g001595		Capana00g001373		Capana03g000705		Capana06g000419
Capana00g002874		Capana00g003081		Capana00g003560		Capana00g003141		Capana00g002251		Capana03g004377		Capana02g001734		Capana01g001234		Capana01g000510		Capana00g003775		Capana00g004489		Capana00g003922		Capana02g003629		Capana09g001814		Capana01g001697		Capana08g001285		Capana01g003330		Capana02g001582		Capana02g002977		Capana05g002557		Capana03g000573		Capana03g001909		Capana00g001375		Capana03g000764		Capana06g001127
Capana00g002882		Capana00g003105		Capana00g003581		Capana00g003200		Capana00g002328		Capana04g000926		Capana02g001869		Capana01g001280		Capana01g000524		Capana00g003778		Capana00g004530		Capana00g004034		Capana02g003662		Capana09g002430		Capana01g002325		Capana08g002246		Capana01g003448		Capana02g001818		Capana02g003016		Capana06g000218		Capana03g000924		Capana03g001946		Capana00g001428		Capana03g000785		Capana06g001135
Capana00g002884		Capana00g003277		Capana00g003769		Capana00g003255		Capana00g002453		Capana04g001319		Capana02g002069		Capana01g001517		Capana01g000650		Capana00g003837		Capana00g004748		Capana00g004093		Capana03g000377		Capana10g001263		Capana01g002790		Capana09g000061		Capana01g003563		Capana02g001973		Capana02g003039		Capana06g000782		Capana03g003603		Capana03g002325		Capana00g001484		Capana03g003272		Capana06g002991
Capana00g002948		Capana00g003298		Capana00g003984		Capana00g003548		Capana00g002610		Capana04g001457		Capana02g002160		Capana01g001657		Capana01g000678		Capana00g003844		Capana00g004783		Capana00g004152		Capana03g000667		Capana10g002227		Capana01g003327		Capana09g001446		Capana01g003745		Capana02g001976		Capana02g003239		Capana06g000803		Capana03g003605		Capana03g003543		Capana00g001503		Capana03g003770		Capana08g000757
Capana00g002988		Capana00g003301		Capana00g004036		Capana00g003559		Capana00g002614		Capana05g001335		Capana02g002161		Capana01g001692		Capana01g000822		Capana00g003978		Capana00g004804		Capana00g004276		Capana03g001126		Capana11g001308		Capana01g003955		Capana10g000038		Capana01g003854		Capana02g001985		Capana02g003513		Capana06g001665		Capana03g003780		Capana03g004207		Capana00g001593		Capana03g004014		Capana08g001557
Capana00g003075		Capana00g003396		Capana00g004158		Capana00g003616		Capana00g002646		Capana05g002100		Capana02g002217		Capana01g001724		Capana01g000828		Capana00g004143		Capana00g004815		Capana00g004560		Capana03g001321		Capana11g002083		Capana01g004239		Capana10g001406		Capana01g004313		Capana02g002088		Capana02g003573		Capana06g002170		Capana03g004167		Capana03g004637		Capana00g001653		Capana04g000542		Capana08g001638
Capana00g003231		Capana00g003428		Capana00g004159		Capana00g003658		Capana00g002657		Capana06g000327		Capana02g002266		Capana01g001725		Capana01g000987		Capana00g004214		Capana00g004912		Capana00g004655		Capana03g001502		Capana12g002616		Capana01g004281		Capana10g002115		Capana01g004314		Capana02g002298		Capana02g003602		Capana07g001097		Capana04g000489		Capana04g000180		Capana00g001727		Capana04g000833		Capana08g001894
Capana00g003260		Capana00g003454		Capana00g004312		Capana00g003680		Capana00g002767		Capana06g000344		Capana02g002441		Capana01g001941		Capana01g001182		Capana00g004217		Capana01g000154		Capana00g004816		Capana03g004204		Capana12g002820		Capana02g000167		Capana11g001708		Capana01g004442		Capana02g002652		Capana02g003621		Capana07g001126		Capana04g000759		Capana04g000238		Capana00g001823		Capana04g001444		Capana08g002060
Capana00g003265		Capana00g003638		Capana00g004573		Capana00g004002		Capana00g002844		Capana06g000605		Capana02g002526		Capana01g002297		Capana01g001347		Capana00g004461		Capana01g000275		Capana00g004827		Capana03g004548		Capana12g002924		Capana02g000413		Capana12g000005		Capana02g000059		Capana02g002719		Capana02g003632		Capana08g001132		Capana04g001057		Capana04g001193		Capana00g001842		Capana04g001479		Capana09g000614
Capana00g003269		Capana00g003966		Capana00g004591		Capana00g004067		Capana00g002850		Capana06g000636		Capana02g002620		Capana01g002556		Capana01g001350		Capana00g004664		Capana01g000570		Capana00g004977		Capana03g004608				Capana02g000656		Capana12g001779		Capana02g000060		Capana03g000216		Capana03g000006		Capana08g001376		Capana04g001265		Capana04g001308		Capana00g001854		Capana04g001530		Capana09g001434
Capana00g003283		Capana00g003979		Capana00g004679		Capana00g004141		Capana00g002958		Capana06g001366		Capana02g002686		Capana01g002558		Capana01g001407		Capana00g004781		Capana01g000614		Capana00g005021		Capana04g000971				Capana02g001785				Capana02g001084		Capana03g000458		Capana03g000182		Capana08g002153		Capana05g000506		Capana04g001416		Capana00g001870		Capana04g001875		Capana09g002243
Capana00g003284		Capana00g004160		Capana00g004820		Capana00g004295		Capana00g003005		Capana06g001371		Capana02g002919		Capana01g002585		Capana01g001420		Capana00g004909		Capana01g000671		Capana00g005036		Capana04g002302				Capana02g002111				Capana02g001089		Capana03g000968		Capana03g000766		Capana08g002585		Capana05g000571		Capana04g001540		Capana00g001872		Capana04g002899		Capana09g002246
Capana00g003368		Capana00g004188		Capana00g004901		Capana00g004368		Capana00g003090		Capana06g001982		Capana02g002965		Capana01g003112	ACLd-D1	Capana01g001887		Capana01g000033		Capana01g001288		Capana01g000010		Capana04g002572				Capana02g002120				Capana02g001274		Capana03g001003		Capana03g000989		Capana09g000906		Capana05g001000		Capana04g001588		Capana00g001901		Capana05g000873		Capana10g001626
Capana00g003369		Capana00g004287		Capana00g004915		Capana00g004435		Capana00g003152		Capana06g002604		Capana02g002997		Capana01g003283		Capana01g002438		Capana01g000053		Capana01g001440		Capana01g000037		Capana04g002860				Capana02g002372				Capana02g001292		Capana03g001040		Capana03g001067		Capana09g000953		Capana05g001097		Capana04g002119		Capana00g001907		Capana05g001092		Capana10g001986
Capana00g003429		Capana00g004438		Capana00g004995		Capana00g004525		Capana00g003234		Capana06g002884		Capana02g003080		Capana01g003465		Capana01g002524		Capana01g000074		Capana01g001485		Capana01g000046		Capana04g002874				Capana02g002387				Capana02g001297		Capana03g001054		Capana03g001392		Capana09g001880		Capana05g001371		Capana05g001119		Capana00g001934		Capana05g001095		Capana11g000594
Capana00g003472		Capana00g004439		Capana01g000044		Capana00g004647		Capana00g003235		Capana06g003048		Capana02g003112		Capana01g003557		Capana01g002604		Capana01g000111	KasI-D1	Capana01g001587		Capana01g000072		Capana05g000184				Capana02g002724				Capana02g001313		Capana03g001101		Capana03g001438		Capana10g000387		Capana05g001382		Capana05g001717		Capana00g001945		Capana05g001125		Capana11g001521
Capana00g003515		Capana00g004500		Capana01g000344		Capana00g004654		Capana00g003399		Capana07g000699		Capana03g000146		Capana01g003662		Capana01g003242		Capana01g000299		Capana01g001642		Capana01g000112	KasI-P3	Capana05g000870				Capana02g002728				Capana02g001401		Capana03g001535		Capana03g001715		Capana10g001180		Capana05g001636		Capana06g000075		Capana00g001947		Capana05g001546		Capana11g002313
Capana00g003650		Capana00g004514		Capana01g000426		Capana00g004767		Capana00g003452		Capana07g000752		Capana03g000434		Capana01g003671		Capana01g003398		Capana01g000402		Capana01g001663		Capana01g000118		Capana05g001093				Capana02g002754				Capana02g001434		Capana03g001559		Capana03g001770		Capana10g002304		Capana05g001819		Capana06g000901		Capana00g002007		Capana05g002151		Capana12g000202
Capana00g003654		Capana00g004545		Capana01g000973		Capana00g004794		Capana00g003466		Capana07g002097		Capana03g000440		Capana01g003672		Capana01g003497		Capana01g000441		Capana01g002053		Capana01g000189		Capana05g001658				Capana02g002913				Capana02g001745		Capana03g003087		Capana03g001799		Capana10g002457		Capana05g001831		Capana06g001475		Capana00g002120		Capana05g002208		Capana12g000372
Capana00g003675		Capana00g004561		Capana01g001031		Capana00g004859		Capana00g003506		Capana07g002357		Capana03g000475		Capana01g003701		Capana01g003498		Capana01g000477		Capana01g002094		Capana01g000364		Capana05g001802				Capana02g002921				Capana02g001895		Capana03g003936		Capana03g002306		Capana11g000076		Capana05g002399		Capana06g001521		Capana00g002132		Capana05g002407		Capana12g001012
Capana00g003691		Capana00g004674		Capana01g001040		Capana00g004874		Capana00g003566		Capana08g000962		Capana03g001004		Capana01g003905		Capana01g003570		Capana01g000581		Capana01g002248		Capana01g000397		Capana05g002210				Capana02g003144				Capana02g001983		Capana04g000148		Capana03g002671		Capana11g001078		Capana05g002481		Capana06g001729		Capana00g002205		Capana06g000459		Capana12g002111
Capana00g003749		Capana00g004745		Capana01g001250		Capana00g004890		Capana00g003571		Capana08g001687		Capana03g001352		Capana01g004047		Capana01g003667		Capana01g000757		Capana01g002270		Capana01g000485		Capana05g002237				Capana02g003192				Capana02g002071		Capana04g000199		Capana03g002746		Capana11g002035		Capana06g000105		Capana07g000550		Capana00g002225		Capana06g000752
Capana00g003752		Capana00g004921		Capana01g001330		Capana00g004918		Capana00g003591		Capana09g000999		Capana03g001378		Capana01g004411		Capana01g003750		Capana01g000775		Capana01g002356		Capana01g000487		Capana05g002337				Capana02g003248				Capana02g002119		Capana04g000253		Capana03g002878		Capana12g002510		Capana06g000389		Capana07g000560		Capana00g002279		Capana06g001009
Capana00g003942		Capana00g004937		Capana01g001331		Capana00g004922		Capana00g003678		Capana09g002301		Capana03g001546		Capana02g000036		Capana01g003985		Capana01g000786		Capana01g002532		Capana01g000495		Capana06g000186				Capana02g003384				Capana02g002151		Capana04g000268		Capana03g002899		Capana12g002574		Capana06g000573		Capana07g001286		Capana00g002361		Capana06g001268
Capana00g003943		Capana01g000006		Capana01g001401		Capana00g005006		Capana00g003768		Capana10g000386		Capana03g001594		Capana02g000385		Capana01g004368		Capana01g000793		Capana01g002675		Capana01g000505		Capana06g000574				Capana03g000249				Capana02g002211		Capana04g000782		Capana03g003011		Capana12g002925		Capana06g000941		Capana07g002034		Capana00g002374		Capana06g001270
Capana00g003944		Capana01g000223		Capana01g002023		Capana01g000039		Capana00g003772		Capana10g000717		Capana03g001987		Capana02g000386		Capana02g000053		Capana01g000815		Capana01g002822		Capana01g000575		Capana06g000779				Capana03g000309				Capana02g002230		Capana04g001378		Capana03g003141				Capana06g001072		Capana08g000025		Capana00g002390		Capana07g001595
Capana00g003947		Capana01g000246		Capana01g002413		Capana01g000083		Capana00g003825		Capana10g001330		Capana03g002073		Capana02g000510		Capana02g001012		Capana01g000887		Capana01g003018		Capana01g000888		Capana06g001129				Capana03g000407				Capana02g003062		Capana04g001981		Capana03g003142				Capana06g001078		Capana08g001056		Capana00g002406		Capana07g001744
Capana00g004035		Capana01g000374		Capana01g002571		Capana01g000132		Capana00g003826		Capana10g002116		Capana03g002082		Capana02g000574		Capana02g001319		Capana01g001021		Capana01g003019		Capana01g000893		Capana06g001397				Capana03g000413				Capana02g003349		Capana04g002064		Capana03g003864				Capana07g000043		Capana08g001104		Capana00g002411		Capana08g000251
Capana00g004066		Capana01g000383		Capana01g002614		Capana01g000155		Capana00g003903		Capana11g001426		Capana03g002193		Capana02g000984		Capana02g001326		Capana01g001028		Capana01g003054		Capana01g001127		Capana06g002727				Capana03g000468				Capana02g003499		Capana04g002559		Capana03g003927				Capana07g000294		Capana08g001252		Capana00g002415		Capana08g001435
Capana00g004102		Capana01g000432		Capana01g002662		Capana01g000386		Capana00g003951		Capana11g001477		Capana03g002227		Capana02g001513		Capana02g001501		Capana01g001311		Capana01g003071		Capana01g001129		Capana07g000042				Capana03g000490				Capana03g000138		Capana04g002566		Capana03g004052				Capana07g000839		Capana08g001268		Capana00g002439		Capana08g001562
Capana00g004113		Capana01g000599		Capana01g002957		Capana01g000405		Capana00g003998		Capana11g001875		Capana03g002831		Capana02g001556	KasI-D5	Capana02g001543		Capana01g001377		Capana01g003236		Capana01g001386		Capana07g000070				Capana03g000530				Capana03g000535		Capana05g000514		Capana03g004493				Capana07g001128		Capana08g001425		Capana00g002441		Capana08g001582
Capana00g004198		Capana01g000602		Capana01g003055		Capana01g000517		Capana00g004063		Capana11g002046		Capana03g003444		Capana02g002131		Capana02g001688		Capana01g001554		Capana01g003237		Capana01g001493		Capana07g000148				Capana03g000569				Capana03g000597		Capana05g000631		Capana04g000265				Capana07g001189		Capana08g001513		Capana00g002444		Capana08g001701
Capana00g004245		Capana01g000603		Capana01g003087		Capana01g001082		Capana00g004073		Capana12g000807		Capana03g003454		Capana02g002147		Capana02g001733		Capana01g001581		Capana01g003548		Capana01g001523		Capana07g000167				Capana03g000594				Capana03g000629		Capana05g001165		Capana04g000681				Capana07g001246		Capana08g001566		Capana00g002451		Capana08g001747
Capana00g004290		Capana01g000791		Capana01g003502		Capana01g001221		Capana00g004089		Capana12g000856		Capana03g003499		Capana02g002519		Capana02g001854		Capana01g001764		Capana01g004111		Capana01g001553		Capana07g000351				Capana03g001045				Capana03g000788		Capana05g001952		Capana04g000973				Capana07g001909		Capana08g001802		Capana00g002452		Capana08g001859
Capana00g004460		Capana01g000859		Capana01g003588		Capana01g001328		Capana00g004165		Capana12g001128		Capana03g003657		Capana02g002646		Capana02g001926		Capana01g002043		Capana01g004400		Capana01g001565		Capana07g001742				Capana03g001373				Capana03g001209		Capana05g002154		Capana04g001056				Capana07g002217		Capana08g001936		Capana00g002498		Capana08g001929
Capana00g004462		Capana01g000882		Capana01g003592		Capana01g001356		Capana00g004167		Capana12g002596		Capana03g003820		Capana02g002677		Capana02g001991		Capana01g002050		Capana02g000048		Capana01g001575		Capana07g001809				Capana03g001451				Capana03g001276		Capana05g002563		Capana04g001118				Capana07g002508		Capana08g001963		Capana00g002501		Capana08g002330
Capana00g004466		Capana01g001013		Capana01g003634		Capana01g001375		Capana00g004286				Capana04g000137		Capana02g002840		Capana02g002033		Capana01g002617		Capana02g000058		Capana01g001648		Capana07g002138				Capana03g001509				Capana03g001568		Capana06g000355		Capana04g001555				Capana08g000060		Capana08g002212		Capana00g002511		Capana08g002331
Capana00g004593		Capana01g001230		Capana01g003894		Capana01g001467		Capana00g004394				Capana04g000152		Capana02g002861		Capana02g002225		Capana01g002656		Capana02g000141		Capana01g001770		Capana07g002270				Capana03g001524				Capana03g001614		Capana06g000831		Capana04g002068				Capana08g001646		Capana08g002226		Capana00g002540		Capana08g002332
Capana00g004604		Capana01g001327		Capana01g004201		Capana01g001723		Capana00g004415				Capana04g000184		Capana02g002889		Capana02g002535		Capana01g002735		Capana02g000278		Capana01g001821		Capana07g002278				Capana03g001532				Capana03g001692		Capana06g000861		Capana04g002517				Capana08g001891		Capana08g002516		Capana00g002546		Capana08g002389
Capana00g004660		Capana01g001501		Capana01g004244		Capana01g001808		Capana00g004470				Capana04g000201		Capana02g002955		Capana02g002617		Capana01g002782		Capana02g000664		Capana01g001831		Capana08g000934				Capana03g001738				Capana03g001723		Capana06g001073		Capana04g002647				Capana08g002000		Capana09g000452		Capana00g002572		Capana08g002683
Capana00g004675		Capana01g001613		Capana01g004287		Capana01g001945		Capana00g004483				Capana04g000362		Capana02g003061		Capana02g002658		Capana01g002794		Capana02g000676		Capana01g001848		Capana08g001309				Capana03g001788				Capana03g001922		Capana06g001585		Capana05g000161				Capana08g002701		Capana09g000760		Capana00g002640		Capana08g002837
Capana00g004916		Capana01g001643		Capana01g004374		Capana01g002051		Capana00g004497				Capana04g000387		Capana02g003078		Capana02g002661		Capana01g002816		Capana02g001004		Capana01g002306		Capana08g001576				Capana03g001859				Capana03g001926		Capana06g001625		Capana05g000609				Capana08g002705		Capana10g001294		Capana00g002643		Capana09g000709
Capana00g004925		Capana01g001670		Capana02g000085		Capana01g002230		Capana00g004557				Capana04g000469		Capana02g003099		Capana02g002718		Capana01g003017		Capana02g001017		Capana01g002430		Capana08g001640				Capana03g002040				Capana03g001989		Capana06g001707		Capana05g000654				Capana09g000028		Capana10g001356		Capana00g002702		Capana09g001153
Capana00g004947		Capana01g001696		Capana02g000177		Capana01g002353		Capana00g004582				Capana04g000696		Capana02g003104		Capana02g002760		Capana01g003373		Capana02g001066		Capana01g002573		Capana08g002132				Capana03g002117				Capana03g002050		Capana06g001752		Capana05g000701				Capana09g001429		Capana10g001981		Capana00g002736		Capana09g001764
Capana00g005037		Capana01g001817		Capana02g000411		Capana01g002624		Capana00g004642				Capana04g000697		Capana02g003710		Capana02g002841		Capana01g003374		Capana02g001083		Capana01g002607		Capana08g002247				Capana03g002129				Capana03g002288		Capana06g002710		Capana05g001195				Capana09g001643		Capana10g002265		Capana00g002746		Capana09g001992
Capana01g000005		Capana01g001833		Capana02g000436		Capana01g002764		Capana00g004661				Capana04g000711		Capana03g000214		Capana02g003004		Capana01g003456		Capana02g001116		Capana01g002623		Capana08g002463	HCHL			Capana03g002644				Capana03g002344		Capana07g000053		Capana05g001418				Capana10g000168		Capana11g000476		Capana00g002752		Capana10g000211
Capana01g000018		Capana01g001926		Capana02g000448		Capana01g002802		Capana00g004719				Capana04g000899		Capana03g000487		Capana02g003021		Capana01g003488		Capana02g001305		Capana01g002754		Capana08g002467				Capana03g002652				Capana03g002801		Capana07g000457		Capana05g001471				Capana10g000617		Capana11g001942		Capana00g002753		Capana10g001138
Capana01g000019		Capana01g002213		Capana02g000588		Capana01g002871		Capana00g004743				Capana04g000980		Capana03g000552		Capana02g003023		Capana01g003534		Capana02g001404		Capana01g002787		Capana08g002616				Capana03g003092				Capana03g003289		Capana07g000591		Capana05g001630				Capana10g001385		Capana12g000590		Capana00g002758		Capana10g001277
Capana01g000175		Capana01g002228		Capana02g001036		Capana01g003579		Capana00g004825				Capana04g001175		Capana03g000601		Capana02g003133		Capana01g003550		Capana02g001491		Capana01g002796		Capana09g000172				Capana03g004040				Capana03g003346		Capana07g000865		Capana05g002062				Capana10g001744		Capana12g001197		Capana00g002761		Capana10g001751
Capana01g000221		Capana01g002460		Capana02g001037		Capana01g003714		Capana00g004850				Capana04g002116		Capana03g000847		Capana02g003137		Capana01g003600		Capana02g001496		Capana01g002821		Capana09g000278				Capana03g004041				Capana03g003656		Capana07g001024		Capana05g002244				Capana10g002122		Capana12g002594		Capana00g002790		Capana10g002248
Capana01g000269		Capana01g002606		Capana02g001258		Capana01g003722		Capana00g005057				Capana05g000024		Capana03g000852		Capana02g003389		Capana01g003751		Capana02g001664		Capana01g003035		Capana09g000351				Capana03g004055				Capana03g004154		Capana07g001235		Capana06g000172				Capana10g002398		Capana12g002624		Capana00g002791		Capana10g002358
Capana01g000274		Capana01g002612		Capana02g001351		Capana01g003889		Capana00g005101				Capana05g000394		Capana03g000908		Capana02g003453		Capana01g003855		Capana02g001783		Capana01g003067		Capana09g000500				Capana03g004129				Capana03g004317		Capana07g001737		Capana06g000243				Capana10g002404		Capana12g002756		Capana00g002794		Capana11g000320
Capana01g000285		Capana01g002638		Capana02g001352		Capana01g004052		Capana01g000052				Capana05g000817		Capana03g001211		Capana02g003467		Capana01g003904		Capana02g001839		Capana01g003245		Capana10g000225				Capana03g004146				Capana03g004442		Capana07g001960		Capana06g000324				Capana10g002441				Capana00g002807		Capana11g001603
Capana01g000350		Capana01g002783		Capana02g001466		Capana01g004117		Capana01g000061				Capana05g001032		Capana03g001402		Capana03g000055		Capana01g004020	KasIIIb-D1	Capana02g002087		Capana01g003323		Capana10g001835				Capana03g004320				Capana03g004449		Capana07g002084		Capana06g000550				Capana11g000757				Capana00g002846		Capana11g002253
Capana01g000360		Capana01g002857		Capana02g001506		Capana01g004465		Capana01g000094				Capana05g001141		Capana03g001416		Capana03g000072		Capana01g004401		Capana02g002353		Capana01g003658		Capana10g001999				Capana03g004417				Capana03g004570		Capana07g002184		Capana06g001278				Capana11g000941				Capana00g002849		Capana12g000508
Capana01g000410		Capana01g003065		Capana02g001535		Capana02g000109		Capana01g000152				Capana05g001524		Capana03g001527		Capana03g000096		Capana01g004480		Capana02g002437		Capana01g003910		Capana10g002297				Capana04g000070				Capana04g000040		Capana07g002242		Capana06g001322				Capana11g001442				Capana00g002861		Capana12g002052
Capana01g000498		Capana01g003076		Capana02g001564		Capana02g000468		Capana01g000185				Capana05g001907		Capana03g001832		Capana03g000180		Capana02g000265		Capana02g002438		Capana01g004028		Capana11g000240				Capana04g000086				Capana04g000078		Capana07g002418		Capana06g001355				Capana12g002167				Capana00g002885		Capana12g002081
Capana01g000516		Capana01g003109		Capana02g001565		Capana02g000479		Capana01g000289				Capana05g001982		Capana03g001977		Capana03g000186		Capana02g000273		Capana02g002439		Capana01g004098		Capana11g000681				Capana04g000115				Capana04g000149		Capana07g002419		Capana06g001702				Capana12g002818				Capana00g002886		Capana12g002306
Capana01g000547		Capana01g003420		Capana02g001630		Capana02g000525		Capana01g000557				Capana05g002190		Capana03g002064		Capana03g000206		Capana02g000493		Capana02g002705		Capana01g004217		Capana11g000751				Capana04g000488				Capana04g000325		Capana07g002491		Capana06g002186								Capana00g002896		Capana12g002892
Capana01g000559		Capana01g003450		Capana02g001644		Capana02g000779		Capana01g000561				Capana06g000318		Capana03g002363		Capana03g000317		Capana02g000611		Capana02g002712		Capana01g004218		Capana11g000966				Capana04g000511				Capana04g000388		Capana08g000110		Capana06g002314								Capana00g002931
Capana01g000562		Capana01g003451		Capana02g001716		Capana02g000904		Capana01g000586				Capana06g000413		Capana03g002448		Capana03g000348		Capana02g000675		Capana02g002829		Capana01g004220		Capana11g001496				Capana04g000596				Capana04g000516		Capana08g000213		Capana06g002943								Capana00g002944
Capana01g000717		Capana01g003499		Capana02g001804		Capana02g000917		Capana01g000587				Capana06g000494		Capana03g002858		Capana03g000430		Capana02g000893		Capana02g003145		Capana01g004357		Capana11g001637				Capana04g000620				Capana04g000577		Capana08g000284		Capana07g000174								Capana00g002954
Capana01g000784		Capana01g003500		Capana02g001838		Capana02g001239		Capana01g000606				Capana06g000735		Capana03g003541		Capana03g000885		Capana02g001064		Capana02g003191		Capana01g004439		Capana11g001868				Capana04g000740				Capana04g000589		Capana08g000387		Capana07g001295								Capana00g002957
Capana01g000816		Capana01g003501		Capana02g001917		Capana02g001288		Capana01g000656				Capana06g000781		Capana03g003669		Capana03g000962		Capana02g001100		Capana02g003361		Capana02g000096		Capana12g000052				Capana04g000742				Capana04g000591		Capana08g000421		Capana07g001870								Capana00g003080
Capana01g000820		Capana01g003517		Capana02g001979		Capana02g001400		Capana01g000694				Capana06g001285		Capana03g004037		Capana03g001064		Capana02g001614		Capana03g000042		Capana02g000122		Capana12g000727				Capana04g000886				Capana04g000836		Capana08g000903		Capana07g001903								Capana00g003084
Capana01g000845		Capana01g003535		Capana02g002009		Capana02g001566		Capana01g000747				Capana06g001336		Capana03g004090		Capana03g001069		Capana02g001642		Capana03g000044		Capana02g000721		Capana12g000851				Capana04g001288				Capana04g000974		Capana08g001286		Capana08g000012								Capana00g003110
Capana01g000873		Capana01g003617		Capana02g002075		Capana02g001585		Capana01g000781				Capana06g001723		Capana03g004363		Capana03g001113		Capana02g001666		Capana03g000233		Capana02g000725						Capana04g002019				Capana04g000996		Capana08g001432		Capana08g000098								Capana00g003122
Capana01g000880		Capana01g003679		Capana02g002166		Capana02g001635		Capana01g000933				Capana06g001765		Capana03g004399		Capana03g001133		Capana02g001669		Capana03g000415		Capana02g000787						Capana04g002361				Capana04g001038		Capana08g001578		Capana08g001369								Capana00g003140
Capana01g000934		Capana01g003707		Capana02g002188		Capana02g001710		Capana01g001023				Capana06g002058		Capana03g004428		Capana03g001382		Capana02g001709		Capana03g000476		Capana02g000830						Capana04g002412				Capana04g001331		Capana08g001972		Capana08g001481								Capana00g003169
Capana01g000984		Capana01g004369		Capana02g002256		Capana02g001744		Capana01g001041				Capana06g002190		Capana03g004429		Capana03g001448		Capana02g001736		Capana03g000497		Capana02g000894						Capana04g002547				Capana04g001369		Capana08g002079		Capana08g001491								Capana00g003201
Capana01g001014		Capana02g000107		Capana02g002269		Capana02g002032		Capana01g001042				Capana06g002351		Capana03g004555		Capana03g001471		Capana02g001858		Capana03g000531		Capana02g000940						Capana04g002658				Capana04g001453		Capana08g002168		Capana08g001492								Capana00g003230
Capana01g001079		Capana02g000111		Capana02g002362		Capana02g002304		Capana01g001117				Capana06g003016		Capana03g004583		Capana03g001621		Capana02g001951		Capana03g000572		Capana02g001015						Capana04g002764				Capana04g001600		Capana08g002625		Capana08g002030								Capana00g003237
Capana01g001112		Capana02g000587		Capana02g002407		Capana02g002676		Capana01g001165				Capana06g003043		Capana03g004610		Capana03g001686		Capana02g001962		Capana03g000584		Capana02g001148						Capana04g002785				Capana04g002597		Capana09g000046		Capana08g002057								Capana00g003271
Capana01g001119		Capana02g000616		Capana02g002656		Capana02g002682		Capana01g001201				Capana06g003044		Capana04g000031		Capana03g001744		Capana02g001963		Capana03g000735		Capana02g001186						Capana04g002889				Capana04g002849		Capana09g000099		Capana08g002165								Capana00g003278
Capana01g001189		Capana02g000652		Capana02g002799		Capana02g002778		Capana01g001278				Capana07g000034		Capana04g000058		Capana03g001787		Capana02g002039		Capana03g000928		Capana02g001321						Capana05g000312				Capana04g002850		Capana09g000364		Capana08g002369								Capana00g003281
Capana01g001376		Capana02g000804		Capana02g002911		Capana02g002785		Capana01g001333				Capana07g000220		Capana04g000103		Capana03g002001		Capana02g002054		Capana03g001014		Capana02g001446						Capana05g000458				Capana05g000023		Capana09g000394		Capana08g002474								Capana00g003337
Capana01g001380		Capana02g000986		Capana02g002914		Capana02g002891		Capana01g001365				Capana07g000672		Capana04g000146		Capana03g002054		Capana02g002146		Capana03g001180		Capana02g001558						Capana05g000565				Capana05g000050		Capana09g000398		Capana08g002646								Capana00g003352
Capana01g001509		Capana02g000997		Capana02g003068		Capana02g002947		Capana01g001395				Capana07g001810		Capana04g000441		Capana03g002152		Capana02g002250		Capana03g001329		Capana02g001578						Capana05g000769				Capana05g000094		Capana09g000429		Capana09g000015								Capana00g003373
Capana01g001716		Capana02g001040		Capana02g003071		Capana02g003009		Capana01g001470				Capana07g002003		Capana04g000535		Capana03g002157		Capana02g002328		Capana03g001743		Capana02g001615						Capana05g001038				Capana05g000180		Capana09g001323		Capana09g000057								Capana00g003389
Capana01g001745		Capana02g001108		Capana02g003092		Capana02g003097		Capana01g001472				Capana07g002004		Capana04g000572		Capana03g002160		Capana02g002339	AT3-D2	Capana03g001782		Capana02g001634						Capana05g001149				Capana05g000507		Capana10g000772		Capana09g000159								Capana00g003397
Capana01g001798		Capana02g001197		Capana02g003131		Capana02g003246		Capana01g001480				Capana07g002009		Capana04g000929		Capana03g002419		Capana02g002376		Capana03g001808		Capana02g001676						Capana05g001292				Capana05g000857		Capana10g000854		Capana09g000253								Capana00g003400
Capana01g001865		Capana02g001212		Capana02g003216		Capana02g003396		Capana01g001481				Capana07g002081		Capana04g000991		Capana03g002678		Capana02g002449		Capana03g001810		Capana02g001679						Capana05g001487				Capana05g000983		Capana10g002172		Capana09g000261								Capana00g003407
Capana01g002104		Capana02g001231		Capana02g003270		Capana02g003595		Capana01g001537				Capana07g002086		Capana04g001226		Capana03g003209		Capana02g002536		Capana03g001841		Capana02g001696						Capana05g001609				Capana05g001028		Capana10g002333		Capana09g001326								Capana00g003411
Capana01g002133		Capana02g001293		Capana02g003351		Capana02g003617		Capana01g001611				Capana07g002269		Capana04g001400		Capana03g003319		Capana02g002632		Capana03g001868		Capana02g001725						Capana05g001734				Capana05g001388		Capana11g000652		Capana09g002021								Capana00g003434
Capana01g002149		Capana02g001393		Capana02g003487		Capana03g000098		Capana01g001690				Capana07g002272		Capana04g001408		Capana03g003556		Capana02g002659		Capana03g001892		Capana02g001802						Capana05g001799				Capana05g001963		Capana11g001266		Capana09g002275								Capana00g003436
Capana01g002339		Capana02g001423		Capana02g003491		Capana03g000109		Capana01g001843				Capana07g002431		Capana04g001434		Capana03g003690		Capana02g002672		Capana03g001981		Capana02g001999						Capana05g001989				Capana05g002260		Capana11g001453		Capana10g000228								Capana00g003446
Capana01g002345		Capana02g001424		Capana02g003566		Capana03g000114		Capana01g001934				Capana07g002441		Capana04g001466		Capana03g003774		Capana02g002704		Capana03g002249		Capana02g002150						Capana05g002083				Capana05g002408		Capana11g001504		Capana10g000290								Capana00g003537
Capana01g002355		Capana02g001485		Capana02g003613		Capana03g000213		Capana01g001937				Capana07g002485		Capana04g001513		Capana03g003832		Capana02g002706		Capana03g002300		Capana02g002284						Capana05g002195				Capana05g002425		Capana11g001554		Capana10g001947								Capana00g003552
Capana01g002397		Capana02g001651		Capana03g000027		Capana03g000241		Capana01g001955				Capana08g000857		Capana04g001609		Capana03g003911		Capana02g002751		Capana03g002309		Capana02g002293						Capana05g002308				Capana05g002501		Capana11g001602		Capana10g002192								Capana00g003602
Capana01g002403		Capana02g001775		Capana03g000164		Capana03g000289		Capana01g001956				Capana08g000873		Capana04g001615		Capana03g004137		Capana02g002791		Capana03g002417		Capana02g002312						Capana05g002480				Capana06g000421		Capana11g002036		Capana10g002494								Capana00g003657
Capana01g002475		Capana02g002052		Capana03g000227		Capana03g000465		Capana01g002020				Capana08g002054		Capana04g001731		Capana03g004249		Capana02g002812		Capana03g002446		Capana02g002314						Capana06g000011				Capana06g000654		Capana11g002070		Capana11g000622								Capana00g003661
Capana01g002660		Capana02g002139		Capana03g000271		Capana03g000593		Capana01g002087				Capana08g002396		Capana04g001758		Capana03g004488		Capana02g002814		Capana03g002479		Capana02g002351						Capana06g000226				Capana06g001087		Capana12g000076		Capana11g001041								Capana00g003666
Capana01g002771		Capana02g002318		Capana03g000292		Capana03g000658		Capana01g002118				Capana08g002490		Capana04g001841		Capana03g004640		Capana02g002836		Capana03g003152		Capana02g002452						Capana06g000298				Capana06g001097		Capana12g000095		Capana11g001681								Capana00g003667
Capana01g002809		Capana02g002325		Capana03g000364		Capana03g000817		Capana01g002190				Capana08g002587		Capana05g000152		Capana04g000037		Capana02g002986		Capana03g003343		Capana02g002465						Capana06g000722				Capana06g001099		Capana12g000204		Capana12g000607								Capana00g003669
Capana01g002824		Capana02g002363		Capana03g000600		Capana03g000844		Capana01g002357				Capana09g000175		Capana05g000247		Capana04g000046		Capana02g003027		Capana03g003361		Capana02g002477						Capana06g000738				Capana06g001435		Capana12g001111		Capana12g000996								Capana00g003671
Capana01g002862		Capana02g002364		Capana03g000636		Capana03g000902		Capana01g002464				Capana09g000324		Capana05g000567		Capana04g000053		Capana02g003087		Capana03g003465		Capana02g002561						Capana06g000810				Capana06g001473		Capana12g001147		Capana12g001380								Capana00g003692
Capana01g002888		Capana02g002447		Capana03g000738		Capana03g000944		Capana01g002505				Capana09g000346		Capana05g000740		Capana04g000136		Capana02g003150		Capana03g003555		Capana02g002577						Capana06g001085				Capana06g001661		Capana12g001744		Capana12g001689								Capana00g003723
Capana01g002889		Capana02g002474		Capana03g000880		Capana03g000960		Capana01g002691				Capana09g000538		Capana05g000775		Capana04g000211		Capana02g003263		Capana03g003749		Capana02g002621						Capana06g001254				Capana06g001897		Capana12g002132		Capana12g002597								Capana00g003762
Capana01g003043		Capana02g002478		Capana03g001053		Capana03g000978		Capana01g002719				Capana09g000599		Capana05g000949		Capana04g000225		Capana02g003341		Capana03g003755		Capana02g002796						Capana06g001308				Capana06g002474		Capana12g002205		Capana12g002704								Capana00g003781
Capana01g003113		Capana02g002479		Capana03g001143		Capana03g001052		Capana01g002823				Capana09g000668		Capana05g001105		Capana04g000655		Capana02g003364		Capana03g004056		Capana02g002823						Capana06g001826				Capana06g002539		Capana12g002880		Capana12g002907								Capana00g003785
Capana01g003196		Capana02g002610		Capana03g001231		Capana03g001056		Capana01g003096				Capana09g000934		Capana05g001340		Capana04g000685		Capana02g003430		Capana03g004197		Capana02g002871						Capana06g001987				Capana06g002581				Capana12g002914								Capana00g003790
Capana01g003379		Capana02g002634		Capana03g001314		Capana03g001537		Capana01g003102				Capana09g001330		Capana05g001477		Capana04g000850		Capana02g003474		Capana03g004220		Capana02g002881						Capana06g002279				Capana06g002704												Capana00g003808
Capana01g003453		Capana02g002641		Capana03g001344		Capana03g001703		Capana01g003272				Capana09g001785		Capana05g001557		Capana04g001121		Capana02g003503		Capana03g004242		Capana02g002887						Capana06g002376				Capana06g002980												Capana00g003885
Capana01g003518		Capana02g002710		Capana03g001467		Capana03g001774		Capana01g003273				Capana09g001797		Capana05g002105		Capana04g001624		Capana02g003558		Capana03g004275		Capana02g002926						Capana06g002476				Capana07g000253												Capana00g003889
Capana01g003555		Capana02g002740		Capana03g001499		Capana03g001794		Capana01g003280				Capana09g001872		Capana05g002262		Capana04g001715		Capana02g003626		Capana03g004276		Capana02g003105						Capana06g002579				Capana07g000259												Capana00g003921
Capana01g003618		Capana02g002766		Capana03g001582		Capana03g001986		Capana01g003306				Capana09g002179		Capana05g002309		Capana04g001897		Capana02g003627		Capana03g004289		Capana02g003143						Capana07g000114				Capana07g000581												Capana00g003955
Capana01g003627		Capana02g002767		Capana03g001623		Capana03g002354		Capana01g003545				Capana09g002218		Capana05g002369		Capana04g002080		Capana02g003634		Capana03g004354		Capana02g003199						Capana07g000537				Capana07g000830												Capana00g003980
Capana01g003763		Capana02g002813		Capana03g001650		Capana03g002484		Capana01g003565				Capana09g002413		Capana05g002395		Capana04g002233		Capana02g003670		Capana03g004358		Capana02g003227						Capana07g000625				Capana07g001585												Capana00g004015
Capana01g003776		Capana02g002822		Capana03g001894		Capana03g002761		Capana01g003585				Capana10g000141		Capana05g002426		Capana04g002423		Capana03g000038		Capana03g004430		Capana02g003259						Capana07g000890				Capana07g002354												Capana00g004053
Capana01g003957		Capana02g003046		Capana03g002209		Capana03g002790		Capana01g003665				Capana10g000688		Capana05g002461		Capana04g002627		Capana03g000102		Capana03g004481		Capana02g003316						Capana07g000989				Capana07g002430												Capana00g004133
Capana01g004001		Capana02g003181		Capana03g002239		Capana03g002839		Capana01g003703				Capana10g000698		Capana05g002536		Capana04g002700		Capana03g000117		Capana03g004551		Capana02g003338						Capana07g001200				Capana07g002432												Capana00g004138
Capana01g004070		Capana02g003253		Capana03g002253		Capana03g002870		Capana01g003737				Capana10g001795		Capana05g002560	PAL-D5	Capana05g000239		Capana03g000126		Capana04g000054		Capana02g003434						Capana07g001323				Capana07g002511												Capana00g004155
Capana01g004099		Capana02g003254		Capana03g002394		Capana03g002952		Capana01g003739				Capana10g002175		Capana06g000015		Capana05g000457		Capana03g000253		Capana04g000077		Capana02g003451						Capana07g001521				Capana08g000136												Capana00g004189
Capana01g004101		Capana02g003255		Capana03g002426		Capana03g002958		Capana01g003790				Capana10g002301		Capana06g000166		Capana05g000500		Capana03g000316		Capana04g000332		Capana02g003486						Capana07g001538				Capana08g000139												Capana00g004191
Capana01g004209		Capana02g003480		Capana03g002493		Capana03g002991		Capana01g003831				Capana10g002512		Capana06g000236		Capana05g000694		Capana03g000385		Capana04g000467		Capana02g003497						Capana07g001584				Capana08g000140												Capana00g004203
Capana01g004230		Capana02g003481		Capana03g002495		Capana03g003199		Capana01g003867				Capana11g000234		Capana06g000237		Capana05g000753		Capana03g000534		Capana04g000471		Capana02g003498						Capana07g001759				Capana08g000667												Capana00g004241
Capana01g004366		Capana02g003590		Capana03g002664		Capana03g003402		Capana01g004000				Capana11g000349		Capana06g000285		Capana05g000894		Capana03g000547		Capana04g000486		Capana02g003507						Capana07g002201				Capana08g000973												Capana00g004294
Capana01g004380		Capana02g003618		Capana03g003513		Capana03g003475		Capana01g004008				Capana11g000962		Capana06g000387		Capana05g001501		Capana03g000595		Capana04g000487		Capana02g003534						Capana07g002241				Capana08g000979												Capana00g004305
Capana01g004390		Capana02g003665		Capana03g003536		Capana03g003619		Capana01g004015				Capana11g001221		Capana06g000650		Capana05g001607		Capana03g000715		Capana04g000584		Capana02g003562						Capana07g002374				Capana08g001012												Capana00g004317
Capana01g004441		Capana02g003676		Capana03g003575		Capana03g003623		Capana01g004019				Capana11g001605		Capana06g000717		Capana05g001622		Capana03g000729		Capana04g000642		Capana02g003576						Capana08g000114				Capana08g001351												Capana00g004463
Capana01g004460		Capana03g000111		Capana03g003610		Capana03g003802		Capana01g004048				Capana12g000116		Capana06g000871		Capana05g001729		Capana03g000778		Capana04g000672		Capana02g003625						Capana08g001163				Capana08g001567												Capana00g004468
Capana01g004472		Capana03g000136		Capana03g003794		Capana03g003843		Capana01g004074				Capana12g000556		Capana06g000896		Capana05g001731		Capana03g000851		Capana04g000678		Capana03g000080						Capana08g001261				Capana08g001614												Capana00g004488
Capana02g000074		Capana03g000139		Capana03g003923		Capana03g003917		Capana01g004081				Capana12g000826		Capana06g000897		Capana05g002162		Capana03g000871		Capana04g000686		Capana03g000267						Capana08g001329				Capana08g001916												Capana00g004601
Capana02g000088		Capana03g000140		Capana03g003942		Capana03g003940		Capana01g004083				Capana12g001239		Capana06g000935		Capana05g002222		Capana03g000910		Capana04g000725		Capana03g000290						Capana08g001333				Capana08g001932												Capana00g004619
Capana02g000162		Capana03g000145		Capana03g004007		Capana03g003974		Capana01g004259				Capana12g001790		Capana06g000939		Capana05g002279		Capana03g001005		Capana04g000895		Capana03g000443						Capana08g001533				Capana08g002047												Capana00g004627
Capana02g000175		Capana03g000198		Capana03g004263		Capana03g004013		Capana01g004303				Capana12g001883		Capana06g000982		Capana05g002494		Capana03g001013		Capana04g000994		Capana03g000444						Capana08g001636				Capana08g002158												Capana00g004656
Capana02g000234		Capana03g000280		Capana03g004271		Capana03g004083		Capana01g004476				Capana12g001905		Capana06g001173		Capana06g000103		Capana03g001041		Capana04g001100		Capana03g000489						Capana08g001651				Capana08g002315												Capana00g004684
Capana02g000283		Capana03g000388		Capana03g004371		Capana03g004120		Capana02g000078				Capana12g002131		Capana06g001342		Capana06g000150		Capana03g001050		Capana04g001395		Capana03g000526						Capana08g002107				Capana08g002342												Capana00g004701
Capana02g000306		Capana03g000445		Capana03g004504		Capana03g004181		Capana02g000098				Capana12g002162		Capana06g001381		Capana06g000159		Capana03g001063		Capana04g001459		Capana03g000797						Capana08g002155				Capana08g002729												Capana00g004702
Capana02g000410		Capana03g000447		Capana03g004511		Capana03g004195		Capana02g000191				Capana12g002622		Capana06g001392		Capana06g000163		Capana03g001123		Capana04g001487		Capana03g000806						Capana08g002409				Capana09g000019												Capana00g004740
Capana02g000416		Capana03g000474		Capana04g000121		Capana03g004222		Capana02g000193				Capana12g002747		Capana06g001479		Capana06g000164		Capana03g001161		Capana04g001638		Capana03g000834						Capana08g002449				Capana09g000222												Capana00g004763
Capana02g000451		Capana03g000557		Capana04g000187		Capana03g004223		Capana02g000224				Capana12g002781		Capana06g001499		Capana06g000275		Capana03g001227		Capana04g001947		Capana03g001025						Capana08g002556				Capana09g000318												Capana00g004812
Capana02g000476		Capana03g000586		Capana04g000278		Capana03g004391		Capana02g000292				Capana12g002796		Capana06g001872		Capana06g000277		Capana03g001317		Capana04g001986		Capana03g001085						Capana08g002681				Capana09g000856												Capana00g004834
Capana02g000619		Capana03g000720		Capana04g000353		Capana03g004557		Capana02g000332						Capana06g002116		Capana06g000554		Capana03g001417		Capana04g002075		Capana03g001241						Capana08g002769				Capana09g000928												Capana00g004847
Capana02g000666		Capana03g000824		Capana04g000709		Capana03g004565		Capana02g000520						Capana06g002546		Capana06g000577		Capana03g001684		Capana04g002130		Capana03g001270						Capana09g000225				Capana09g000929												Capana00g004882
Capana02g000695		Capana03g000830		Capana04g000890		Capana04g000005		Capana02g000536						Capana06g002917		Capana06g000625		Capana03g001811		Capana04g002144		Capana03g001600						Capana09g000408				Capana09g001583												Capana00g004903
Capana02g000850		Capana03g000881		Capana04g001047		Capana04g000021		Capana02g000685						Capana06g002992		Capana06g000683		Capana03g001814		Capana04g002353		Capana03g001755						Capana09g000551				Capana09g001763												Capana00g004904
Capana02g000995		Capana03g001073		Capana04g001270		Capana04g000392		Capana02g000773						Capana07g000296		Capana06g000703		Capana03g001954		Capana04g002410		Capana03g001760						Capana09g000808				Capana09g002024												Capana00g004929
Capana02g001016		Capana03g001087		Capana04g001523		Capana04g000470		Capana02g000816						Capana07g000417		Capana06g000786		Capana03g002038		Capana05g000029		Capana03g001767						Capana09g000809				Capana09g002192												Capana00g004967
Capana02g001077		Capana03g001120		Capana04g001653		Capana04g000493		Capana02g000819						Capana07g000759		Capana06g000804		Capana03g002039		Capana05g000089		Capana03g001791						Capana09g001164				Capana09g002193												Capana00g004972
Capana02g001090		Capana03g001138		Capana04g001866		Capana04g000522		Capana02g000983						Capana07g000951		Capana06g000852		Capana03g002056		Capana05g000173		Capana03g001819						Capana09g001961				Capana09g002415												Capana00g004979
Capana02g001094		Capana03g001173		Capana04g001975		Capana04g000536		Capana02g001003						Capana07g000979		Capana06g001037		Capana03g002387		Capana05g000446		Capana03g001927						Capana09g001978				Capana10g000062												Capana00g005028
Capana02g001117		Capana03g001210		Capana04g002549		Capana04g000699		Capana02g001014						Capana07g001123		Capana06g001114		Capana03g002564		Capana05g000584		Capana03g001979						Capana10g000196				Capana10g000085												Capana00g005044
Capana02g001318		Capana03g001237		Capana04g002739		Capana04g000751	BCAT-D1	Capana02g001046						Capana07g001338		Capana06g001188		Capana03g002611		Capana05g000675		Capana03g002161						Capana10g000362				Capana10g000403												Capana00g005055
Capana02g001382		Capana03g001242		Capana04g002759		Capana04g000765		Capana02g001068						Capana07g001363		Capana06g001454		Capana03g002680		Capana05g000746		Capana03g002199						Capana10g000364				Capana10g000787												Capana00g005070
Capana02g001452		Capana03g001278		Capana05g000037		Capana04g000859		Capana02g001165						Capana07g001944		Capana06g001577		Capana03g002685		Capana05g000813		Capana03g002218						Capana10g000863				Capana10g001336												Capana01g000009
Capana02g001490		Capana03g001283		Capana05g000060		Capana04g000861		Capana02g001205						Capana07g001999		Capana06g001717		Capana03g002740		Capana05g001183		Capana03g002401						Capana10g001153				Capana10g001630												Capana01g000015
Capana02g001583		Capana03g001286		Capana05g000174		Capana04g001177		Capana02g001207						Capana07g002125		Capana06g001871		Capana03g002775		Capana05g001682		Capana03g002616						Capana10g001469				Capana10g001837												Capana01g000035
Capana02g001587		Capana03g001354		Capana05g000498		Capana04g001713		Capana02g001235						Capana07g002226		Capana06g002046		Capana03g003006		Capana05g001787		Capana03g002812						Capana10g001556				Capana10g002065												Capana01g000040
Capana02g001595		Capana03g001357		Capana05g000518		Capana04g001919		Capana02g001335						Capana08g000026		Capana06g002070		Capana03g003098		Capana05g002030		Capana03g003115						Capana10g001663				Capana10g002082												Capana01g000048
Capana02g001625		Capana03g001419		Capana05g000672		Capana04g002204		Capana02g001359						Capana08g000039		Capana06g002578		Capana03g003248		Capana05g002497		Capana03g003147						Capana10g001726				Capana10g002246												Capana01g000049
Capana02g001626		Capana03g001422		Capana05g000687		Capana04g002367		Capana02g001367						Capana08g000134		Capana06g002611		Capana03g003349		Capana06g000060		Capana03g003165						Capana10g001824				Capana10g002316												Capana01g000066
Capana02g001658		Capana03g001431		Capana05g000792		Capana04g002852		Capana02g001437						Capana08g000249		Capana06g002789		Capana03g003398		Capana06g000361		Capana03g003471						Capana10g002091				Capana10g002359												Capana01g000076
Capana02g001689		Capana03g001463		Capana05g000811		Capana04g002857		Capana02g001439						Capana08g000721		Capana06g003052		Capana03g003472		Capana06g000363		Capana03g003557						Capana10g002414				Capana11g000028												Capana01g000088
Capana02g001706		Capana03g001492		Capana05g001160		Capana04g002884		Capana02g001514						Capana08g000756		Capana07g000664		Capana03g003618		Capana06g000519		Capana03g003574						Capana10g002447				Capana11g000141												Capana01g000097
Capana02g001758		Capana03g001493		Capana05g001482		Capana05g000047		Capana02g001517						Capana08g000861		Capana07g001011		Capana03g003648		Capana06g000568		Capana03g003579						Capana10g002476				Capana11g000191												Capana01g000101
Capana02g001934		Capana03g001574		Capana05g001580		Capana05g000075		Capana02g001649						Capana08g001075		Capana07g001279		Capana03g003907		Capana06g000597		Capana03g003586						Capana11g000167				Capana11g000241												Capana01g000105
Capana02g001966		Capana03g001575		Capana05g001600		Capana05g000202		Capana02g001816						Capana08g001222		Capana07g001455		Capana03g004092		Capana06g000611		Capana03g003642						Capana11g000213				Capana11g000347												Capana01g000113	KasI-D87
Capana02g002017		Capana03g001613		Capana05g001781		Capana05g000204		Capana02g001824						Capana08g001327		Capana07g001470		Capana03g004306		Capana06g000733		Capana03g003997						Capana11g000747				Capana11g000601												Capana01g000129
Capana02g002049		Capana03g001669		Capana05g001961		Capana05g000517		Capana02g002029						Capana08g001522		Capana07g001523		Capana03g004318		Capana06g000840		Capana03g004100						Capana11g001010				Capana11g000842												Capana01g000138
Capana02g002100		Capana03g001818		Capana05g002198		Capana05g000531		Capana02g002095						Capana08g001987		Capana07g001617		Capana03g004515		Capana06g000930		Capana03g004124						Capana11g001463				Capana11g001240												Capana01g000141
Capana02g002108		Capana03g002142		Capana05g002212		Capana05g001103		Capana02g002144						Capana08g002013		Capana07g002030		Capana03g004591		Capana06g000965		Capana03g004130						Capana11g001921				Capana11g001402												Capana01g000150
Capana02g002117		Capana03g002552		Capana05g002360		Capana05g001228		Capana02g002186						Capana08g002063		Capana07g002092		Capana04g000026		Capana06g001245		Capana03g004132						Capana11g002114				Capana11g001694												Capana01g000157
Capana02g002122		Capana03g002850		Capana05g002401		Capana05g001302		Capana02g002322						Capana08g002156		Capana07g002093		Capana04g000063		Capana06g001503		Capana03g004141						Capana11g002115				Capana11g001949												Capana01g000190
Capana02g002123		Capana03g002972		Capana05g002417		Capana05g001453		Capana02g002391						Capana08g002262		Capana07g002183		Capana04g000076		Capana06g001527		Capana03g004144						Capana11g002141				Capana11g002255												Capana01g000192
Capana02g002177		Capana03g003057		Capana06g000056		Capana05g002114		Capana02g002468						Capana08g002291		Capana07g002227		Capana04g000114		Capana06g001566		Capana03g004300						Capana11g002166				Capana11g002340												Capana01g000196
Capana02g002252		Capana03g003225		Capana06g000094		Capana05g002275		Capana02g002492						Capana08g002370		Capana07g002273		Capana04g000139		Capana06g001581		Capana03g004327						Capana12g000006				Capana12g000026												Capana01g000199
Capana02g002389		Capana03g003323		Capana06g000110		Capana05g002277		Capana02g002533						Capana08g002523		Capana07g002303		Capana04g000213		Capana06g001686		Capana03g004328						Capana12g000091				Capana12g000028												Capana01g000203
Capana02g002406		Capana03g003377		Capana06g000111		Capana05g002305		Capana02g002549						Capana09g000048		Capana08g000052		Capana04g000361		Capana06g001704		Capana03g004406						Capana12g000302				Capana12g000121												Capana01g000206
Capana02g002475		Capana03g003413		Capana06g000224		Capana05g002336		Capana02g002695						Capana09g000600		Capana08g000372		Capana04g000372		Capana06g001730		Capana03g004410						Capana12g000356				Capana12g000151												Capana01g000219
Capana02g002516		Capana03g003466		Capana06g000481		Capana05g002456		Capana02g002790						Capana09g000653		Capana08g000583		Capana04g000431		Capana06g001805		Capana03g004576						Capana12g000382				Capana12g000159												Capana01g000220
Capana02g002575		Capana03g003630		Capana06g000492		Capana05g002490		Capana02g002808						Capana09g000745		Capana08g001106		Capana04g000468		Capana06g001991		Capana03g004582						Capana12g000594				Capana12g000288												Capana01g000222
Capana02g002603		Capana03g003736		Capana06g000588		Capana06g000197	FatA-D1	Capana02g002932						Capana09g001232		Capana08g001125		Capana04g000651		Capana06g002443		Capana03g004602						Capana12g000630				Capana12g000452												Capana01g000231
Capana02g002643		Capana03g003849		Capana06g000638		Capana06g000210		Capana02g002952						Capana09g001370		Capana08g001384		Capana04g000785		Capana06g002616		Capana04g000024						Capana12g001004				Capana12g000699												Capana01g000237
Capana02g002668		Capana03g004138		Capana06g000924		Capana06g000279		Capana02g002959						Capana09g001791		Capana08g001385		Capana04g000788		Capana06g002915		Capana04g000081						Capana12g001281				Capana12g000742												Capana01g000252
Capana02g002709		Capana03g004213		Capana06g001118		Capana06g000295		Capana02g002960						Capana09g001956		Capana08g001552		Capana04g001014		Capana07g000333		Capana04g000085						Capana12g001504				Capana12g001361												Capana01g000256
Capana02g002733		Capana03g004412		Capana06g001170		Capana06g000312		Capana02g003024						Capana09g001957		Capana08g001748		Capana04g001042		Capana07g000543		Capana04g000182						Capana12g001948				Capana12g001633												Capana01g000258
Capana02g002735		Capana03g004432		Capana06g001235		Capana06g000525		Capana02g003028						Capana09g002226		Capana08g001781		Capana04g001109		Capana07g000652		Capana04g000188						Capana12g002127				Capana12g001718												Capana01g000264
Capana02g002755		Capana03g004441		Capana06g001324		Capana06g000556		Capana02g003048						Capana09g002271		Capana08g001949		Capana04g001403		Capana07g000931		Capana04g000192						Capana12g002417				Capana12g002286												Capana01g000268
Capana02g002802		Capana03g004443		Capana06g001399		Capana06g000566		Capana02g003077						Capana09g002320		Capana08g001996		Capana04g001726		Capana07g001138		Capana04g000400						Capana12g002500				Capana12g002476												Capana01g000294
Capana02g002811		Capana03g004445		Capana06g001755		Capana06g000655		Capana02g003083						Capana09g002344		Capana08g002076		Capana04g002283		Capana07g001359		Capana04g000448						Capana12g002715				Capana12g002523												Capana01g000295
Capana02g002878		Capana03g004448		Capana06g001875		Capana06g000763		Capana02g003339						Capana09g002424		Capana08g002089		Capana04g002426		Capana07g001807		Capana04g000499						Capana12g002744																Capana01g000321
Capana02g002920		Capana03g004450		Capana06g002018		Capana06g000771		Capana02g003356						Capana10g000018		Capana08g002123		Capana04g002598		Capana07g002135		Capana04g000694						Capana12g002877																Capana01g000326
Capana02g002928	BCAT-D4	Capana03g004508		Capana06g002028		Capana06g000857		Capana02g003365						Capana10g000052		Capana08g002208		Capana04g002804		Capana07g002224		Capana04g000698						Capana12g002881																Capana01g000348
Capana02g002957		Capana03g004549		Capana06g002101		Capana06g001354		Capana02g003370						Capana10g000375		Capana08g002210		Capana04g002807		Capana07g002240		Capana04g000723																						Capana01g000349
Capana02g003002		Capana04g000017		Capana06g002102		Capana06g001572		Capana02g003445						Capana10g000415		Capana08g002303		Capana04g002812		Capana07g002337		Capana04g000852																						Capana01g000351
Capana02g003053		Capana04g000074		Capana06g002252		Capana06g001660		Capana02g003523						Capana10g001195		Capana08g002373		Capana04g002813		Capana07g002458		Capana04g001044																						Capana01g000361
Capana02g003055		Capana04g000120		Capana06g002585		Capana06g001854		Capana02g003530						Capana10g001242		Capana08g002446		Capana05g000124		Capana07g002463		Capana04g001234																						Capana01g000387
Capana02g003073		Capana04g000130		Capana06g002744		Capana06g002161		Capana02g003543						Capana10g001244		Capana08g002476		Capana05g000220		Capana08g000005		Capana04g001590																						Capana01g000399
Capana02g003074	CCoAOMT-D4	Capana04g000194		Capana06g002956		Capana06g002188		Capana02g003565						Capana10g001278		Capana08g002531		Capana05g000260		Capana08g000079		Capana04g002111																						Capana01g000408
Capana02g003075		Capana04g000317		Capana07g000168		Capana06g002500		Capana02g003607						Capana10g001284		Capana08g002584		Capana05g000341		Capana08g000133		Capana04g002561																						Capana01g000455
Capana02g003100		Capana04g000385		Capana07g000353		Capana06g002566		Capana02g003624						Capana10g001339		Capana09g000271		Capana05g000375		Capana08g000195		Capana04g002562																						Capana01g000461
Capana02g003136		Capana04g000445		Capana07g000456		Capana06g002940		Capana02g003633						Capana10g001509		Capana09g000331		Capana05g000378		Capana08g000496		Capana04g002600																						Capana01g000499
Capana02g003188		Capana04g000513		Capana07g000522		Capana07g000152		Capana02g003652						Capana10g001532		Capana09g000355		Capana05g000605		Capana08g000541		Capana04g002757																						Capana01g000518
Capana02g003220		Capana04g000551		Capana07g000645		Capana07g000154		Capana02g003681						Capana10g001750		Capana09g000448		Capana05g000800		Capana08g000579		Capana04g002762																						Capana01g000521
Capana02g003291		Capana04g000617		Capana07g000697		Capana07g000166		Capana02g003684						Capana10g001857		Capana09g000542		Capana05g000810		Capana08g000902		Capana04g002876																						Capana01g000522
Capana02g003313		Capana04g000705		Capana07g000716		Capana07g000169		Capana02g003685						Capana10g002197		Capana09g000896		Capana05g000920		Capana08g001049		Capana04g002888																						Capana01g000525
Capana02g003347		Capana04g000738		Capana07g001114		Capana07g000239		Capana02g003692						Capana10g002336		Capana09g002259		Capana05g000937		Capana08g001058		Capana05g000005																						Capana01g000528
Capana02g003377		Capana04g000743		Capana07g001271		Capana07g000243		Capana02g003707						Capana10g002384		Capana09g002307		Capana05g001042		Capana08g001213		Capana05g000073																						Capana01g000530
Capana02g003457		Capana04g000802		Capana07g001432		Capana07g000264		Capana02g003708						Capana10g002425		Capana09g002308		Capana05g001336		Capana08g001229		Capana05g000103																						Capana01g000531
Capana02g003508		Capana04g001093		Capana07g001559		Capana07g000285		Capana03g000040						Capana10g002427		Capana09g002436		Capana05g001347		Capana08g001322		Capana05g000107																						Capana01g000538
Capana02g003614		Capana04g001261		Capana07g001625		Capana07g000366		Capana03g000191						Capana11g000041		Capana10g000066		Capana05g001398		Capana08g001477		Capana05g000114																						Capana01g000540
Capana02g003630		Capana04g001385		Capana07g001770		Capana07g000523		Capana03g000286						Capana11g000051		Capana10g000166		Capana05g001949		Capana08g001597		Capana05g000126																						Capana01g000552
Capana02g003635		Capana04g001528		Capana07g001875		Capana07g000721		Capana03g000296						Capana11g000096		Capana10g000210		Capana05g001951		Capana08g001652		Capana05g000298																						Capana01g000576
Capana02g003649		Capana04g001537		Capana07g001910		Capana07g000786		Capana03g000319						Capana11g000568		Capana10g000224		Capana05g002056		Capana08g001912		Capana05g000331																						Capana01g000582
Capana03g000005		Capana04g001643		Capana07g001973		Capana07g000840		Capana03g000358						Capana11g001053		Capana10g000255		Capana05g002058		Capana08g001934		Capana05g000397																						Capana01g000596
Capana03g000051		Capana04g001645		Capana07g002037		Capana07g000878		Capana03g000398						Capana11g001225		Capana10g000553		Capana05g002266		Capana08g001973		Capana05g000570																						Capana01g000607
Capana03g000054		Capana04g001778		Capana07g002215		Capana07g000999		Capana03g000505						Capana11g001371		Capana10g000689		Capana05g002486		Capana08g002264		Capana05g000600																						Capana01g000611
Capana03g000073		Capana04g002016		Capana07g002216		Capana07g001111		Capana03g000506						Capana11g001409		Capana10g000755		Capana05g002508		Capana08g002299		Capana05g000748																						Capana01g000615
Capana03g000087		Capana04g002312		Capana07g002305		Capana07g001125		Capana03g000561						Capana11g001559		Capana10g000907		Capana06g000005		Capana08g002589		Capana05g000860																						Capana01g000696
Capana03g000144		Capana04g002396	CCoAOMT-D7	Capana07g002407		Capana07g001241		Capana03g000648						Capana11g001600		Capana10g001420		Capana06g000114		Capana08g002691		Capana05g001169																						Capana01g000704
Capana03g000168		Capana04g002509		Capana07g002448		Capana07g001366		Capana03g000678						Capana11g001830		Capana10g001442		Capana06g000179		Capana08g002794		Capana05g001239																						Capana01g000774
Capana03g000169		Capana04g002522		Capana08g000020		Capana07g001417		Capana03g000688						Capana11g001883		Capana10g001483		Capana06g000346		Capana08g002857		Capana05g001562																						Capana01g000777
Capana03g000252		Capana04g002585		Capana08g000047		Capana07g001828		Capana03g000812						Capana11g001965		Capana10g001516		Capana06g000391		Capana09g000064		Capana05g001865																						Capana01g000794
Capana03g000399		Capana04g002592		Capana08g000076		Capana07g001872		Capana03g000827						Capana11g002108		Capana10g001571		Capana06g000431		Capana09g000138		Capana05g002020																						Capana01g000797
Capana03g000421		Capana04g002595		Capana08g000118		Capana07g001878		Capana03g000875						Capana11g002248		Capana10g001754		Capana06g000460		Capana09g000161		Capana05g002163																						Capana01g000803
Capana03g000556		Capana04g002612		Capana08g000141		Capana07g001881		Capana03g000884						Capana11g002272		Capana10g002078		Capana06g000583		Capana09g000255		Capana05g002164																						Capana01g000831
Capana03g000576		Capana04g002836		Capana08g000663		Capana07g002054		Capana03g000887						Capana11g002347		Capana10g002449		Capana06g000663		Capana09g000329		Capana05g002535																						Capana01g000869
Capana03g000650		Capana05g000031		Capana08g000703		Capana07g002196		Capana03g000945						Capana12g000187		Capana11g000079		Capana06g000674		Capana09g000602		Capana05g002549																						Capana01g000883
Capana03g000717		Capana05g000057		Capana08g000845		Capana07g002229		Capana03g001018						Capana12g000236		Capana11g000208		Capana06g000675		Capana09g000603		Capana05g002550																						Capana01g000884
Capana03g000749		Capana05g000134		Capana08g000874		Capana07g002359		Capana03g001059						Capana12g000999		Capana11g000329		Capana06g000687		Capana09g000677		Capana06g000095																						Capana01g000913
Capana03g000767		Capana05g000206		Capana08g001037		Capana07g002395		Capana03g001225						Capana12g001450		Capana11g000624		Capana06g000755		Capana09g000685		Capana06g000155																						Capana01g000920
Capana03g000790		Capana05g000328		Capana08g001080		Capana07g002436		Capana03g001337						Capana12g002037		Capana11g001091		Capana06g000792		Capana09g000985		Capana06g000227																						Capana01g000921
Capana03g000815		Capana05g000361		Capana08g001246		Capana07g002447		Capana03g001338						Capana12g002278		Capana11g001523		Capana06g000793		Capana09g001063		Capana06g000231																						Capana01g000923
Capana03g000825		Capana05g000452		Capana08g001311		Capana07g002464		Capana03g001452						Capana12g002403		Capana11g001840		Capana06g000794		Capana09g001440		Capana06g000232																						Capana01g000945
Capana03g000870		Capana05g000499		Capana08g001375		Capana07g002465		Capana03g001533						Capana12g002413		Capana11g001855		Capana06g000927		Capana09g001518		Capana06g000280																						Capana01g000966
Capana03g000987		Capana05g000809		Capana08g001526		Capana08g000099		Capana03g001538						Capana12g002436		Capana12g000112		Capana06g000974		Capana09g001543		Capana06g000386																						Capana01g000994
Capana03g001098		Capana05g000819		Capana08g001564		Capana08g000245		Capana03g001688						Capana12g002578		Capana12g000511		Capana06g001068		Capana09g001637		Capana06g000465																						Capana01g001005
Capana03g001107		Capana05g000955		Capana08g001693		Capana08g000611		Capana03g001713						Capana12g002883		Capana12g000640		Capana06g001083		Capana09g002153		Capana06g000586																						Capana01g001038
Capana03g001144		Capana05g001245		Capana08g001725		Capana08g000855		Capana03g001771								Capana12g000817		Capana06g001169		Capana09g002269		Capana06g000621																						Capana01g001076
Capana03g001206		Capana05g001275		Capana08g001732		Capana08g000941		Capana03g001773								Capana12g001023		Capana06g001256		Capana10g000120		Capana06g000702																						Capana01g001104
Capana03g001215		Capana05g001390		Capana08g001825		Capana08g000944		Capana03g001796								Capana12g001058		Capana06g001338		Capana10g000213		Capana06g000748																						Capana01g001151
Capana03g001233		Capana05g001661		Capana08g001853		Capana08g000987		Capana03g001851								Capana12g001297		Capana06g001403		Capana10g000294		Capana06g000918																						Capana01g001215
Capana03g001267		Capana05g001701		Capana08g001971		Capana08g001085		Capana03g001978								Capana12g001972		Capana06g001405		Capana10g000533		Capana06g000919																						Capana01g001279
Capana03g001308		Capana05g001704		Capana08g002056		Capana08g001107		Capana03g001992								Capana12g002023		Capana06g001685		Capana10g000614		Capana06g000973																						Capana01g001319
Capana03g001342		Capana05g001807		Capana08g002085		Capana08g001277		Capana03g001994								Capana12g002119		Capana06g001783		Capana10g000968		Capana06g001067																						Capana01g001320
Capana03g001348		Capana05g001990		Capana08g002086		Capana08g001278		Capana03g002071								Capana12g002409		Capana06g001990		Capana10g001235		Capana06g001108																						Capana01g001334
Capana03g001569		Capana05g002063		Capana08g002087		Capana08g001332		Capana03g002097								Capana12g002699		Capana06g002146		Capana10g001331		Capana06g001334																						Capana01g001340
Capana03g001619		Capana05g002125		Capana08g002134		Capana08g001983		Capana03g002100								Capana12g002726		Capana06g002718		Capana10g001531		Capana06g001335																						Capana01g001379
Capana03g001620		Capana05g002428		Capana08g002269		Capana08g002080		Capana03g002198								Capana12g002728		Capana06g002873		Capana10g001591		Capana06g001359																						Capana01g001399
Capana03g001659		Capana05g002463		Capana08g002341		Capana08g002229		Capana03g002208								Capana12g002738		Capana06g003007		Capana10g001694		Capana06g001421																						Capana01g001402
Capana03g001695		Capana05g002533		Capana08g002468		Capana08g002258		Capana03g002215								Capana12g002845		Capana07g000077		Capana10g001887		Capana06g001463																						Capana01g001447
Capana03g001730		Capana06g000028		Capana08g002473		Capana08g002304		Capana03g002255								Capana12g002851		Capana07g000147		Capana10g002040		Capana06g001677																						Capana01g001469
Capana03g001732		Capana06g000071		Capana08g002529		Capana08g002322		Capana03g002260								Capana12g002857		Capana07g000348		Capana10g002257		Capana06g001725																						Capana01g001488
Capana03g001733		Capana06g000079		Capana08g002717		Capana08g002394		Capana03g002410								Capana12g002873		Capana07g000527		Capana10g002362		Capana06g001969																						Capana01g001489
Capana03g001736		Capana06g000185		Capana08g002763		Capana08g002453		Capana03g002445										Capana07g000648		Capana10g002417		Capana06g002269																						Capana01g001495
Capana03g001749		Capana06g000220		Capana09g000116		Capana08g002581		Capana03g002472										Capana07g000710		Capana11g000046		Capana06g002440																						Capana01g001516
Capana03g001764		Capana06g000359		Capana09g000146		Capana08g002755		Capana03g002476										Capana07g000730		Capana11g000190		Capana06g002444																						Capana01g001532
Capana03g001781		Capana06g000371		Capana09g000192		Capana08g002774		Capana03g002544										Capana07g000851		Capana11g000341		Capana06g002498																						Capana01g001535
Capana03g001812		Capana06g000410		Capana09g000407		Capana08g002820		Capana03g002606										Capana07g001045		Capana11g000359		Capana06g002508																						Capana01g001574
Capana03g001815		Capana06g000478		Capana09g000409		Capana08g002842		Capana03g002665										Capana07g001146		Capana11g000468		Capana06g002652																						Capana01g001602
Capana03g001940		Capana06g000513		Capana09g000564		Capana09g000004		Capana03g002834										Capana07g001586		Capana11g000554		Capana06g002663																						Capana01g001628
Capana03g001961		Capana06g000514		Capana09g000679		Capana09g000040		Capana03g002960										Capana07g001587		Capana11g000572		Capana06g002830																						Capana01g001661
Capana03g002047		Capana06g000523		Capana09g000691		Capana09g000731		Capana03g003015										Capana07g001697		Capana11g000690		Capana06g002948																						Capana01g001673
Capana03g002110		Capana06g000543		Capana09g001053		Capana09g000838		Capana03g003075										Capana07g001988		Capana11g000772		Capana06g003058																						Capana01g001681
Capana03g002163		Capana06g000546		Capana09g001315		Capana09g000884		Capana03g003093										Capana07g002042		Capana11g000847		Capana07g000030																						Capana01g001687
Capana03g002170		Capana06g000604		Capana09g001451		Capana09g000914		Capana03g003120										Capana07g002070		Capana11g001034		Capana07g000049																						Capana01g001689
Capana03g002191		Capana06g000688		Capana09g001481		Capana09g001161		Capana03g003197										Capana07g002144		Capana11g001056		Capana07g000060																						Capana01g001691
Capana03g002345		Capana06g000689		Capana09g001482		Capana09g001187		Capana03g003276										Capana07g002146		Capana11g001192		Capana07g000083																						Capana01g001718
Capana03g002554		Capana06g000708		Capana09g001674		Capana09g001382		Capana03g003337										Capana07g002213		Capana11g001525		Capana07g000110																						Capana01g001739
Capana03g002561		Capana06g000749		Capana09g001696		Capana09g001461		Capana03g003382										Capana07g002408		Capana11g001574		Capana07g000132																						Capana01g001756
Capana03g002619		Capana06g000770		Capana09g001700		Capana09g001538		Capana03g003395										Capana07g002440		Capana11g001784		Capana07g000553																						Capana01g001759
Capana03g002638		Capana06g001146		Capana09g001772		Capana09g001687		Capana03g003415										Capana08g000058		Capana11g002018		Capana07g000771																						Capana01g001864
Capana03g002645		Capana06g001229		Capana09g001807		Capana09g001726		Capana03g003430										Capana08g000088		Capana11g002047		Capana07g001127																						Capana01g001914
Capana03g002662		Capana06g001294		Capana09g002400		Capana09g001808		Capana03g003433										Capana08g000119		Capana11g002261		Capana07g001154																						Capana01g001963
Capana03g002786		Capana06g001396		Capana10g000068		Capana09g001816		Capana03g003531										Capana08g000144		Capana11g002292		Capana07g001239																						Capana01g001964
Capana03g002826		Capana06g001416		Capana10g000131		Capana09g001847		Capana03g003599										Capana08g000206		Capana12g000362		Capana07g001245																						Capana01g001975
Capana03g002917		Capana06g001471		Capana10g000207		Capana09g001859		Capana03g003601										Capana08g000300		Capana12g000443		Capana07g001247																						Capana01g002013
Capana03g003007		Capana06g001493		Capana10g000219		Capana09g001991		Capana03g003709										Capana08g000841		Capana12g000498		Capana07g001600																						Capana01g002090
Capana03g003081		Capana06g001650		Capana10g000302		Capana09g002065		Capana03g003710										Capana08g001381		Capana12g000581		Capana07g001772																						Capana01g002095
Capana03g003159		Capana06g001739		Capana10g000326		Capana09g002199	PAL-D3	Capana03g003781										Capana08g001408		Capana12g000605		Capana07g001874																						Capana01g002131
Capana03g003214		Capana06g001746		Capana10g000377		Capana09g002200	PAL-D2	Capana03g003787										Capana08g001518		Capana12g000666		Capana07g002008																						Capana01g002194
Capana03g003434		Capana06g001935		Capana10g001105		Capana09g002217		Capana03g003814										Capana08g001589		Capana12g000732		Capana07g002010																						Capana01g002205
Capana03g003663		Capana06g001996		Capana10g001144		Capana10g000019		Capana03g003817										Capana08g001686		Capana12g000818		Capana07g002011																						Capana01g002328
Capana03g003708		Capana06g002205		Capana10g001184		Capana10g000037		Capana03g003874										Capana08g001724		Capana12g000823		Capana07g002108																						Capana01g002439
Capana03g003766		Capana06g002296		Capana10g001513		Capana10g000042		Capana03g003887										Capana08g001792		Capana12g001364		Capana07g002260																						Capana01g002457
Capana03g003888		Capana06g002516		Capana10g001823		Capana10g000044		Capana03g003992										Capana08g001921		Capana12g001506		Capana07g002411																						Capana01g002473
Capana03g003937		Capana06g002522		Capana10g001833		Capana10g000111		Capana03g004026										Capana08g001999		Capana12g002100		Capana07g002488																						Capana01g002477
Capana03g003991		Capana06g002955		Capana10g001908		Capana10g000278		Capana03g004087										Capana08g002027		Capana12g002107		Capana08g000250																						Capana01g002554
Capana03g004152		Capana06g002981		Capana10g002048		Capana10g000376		Capana03g004238										Capana08g002028		Capana12g002229		Capana08g000327																						Capana01g002565
Capana03g004232		Capana06g003057		Capana10g002120		Capana10g000541		Capana03g004279										Capana08g002040		Capana12g002263		Capana08g000685																						Capana01g002597
Capana03g004265		Capana07g000005		Capana10g002148		Capana10g000719		Capana03g004281										Capana08g002151		Capana12g002320		Capana08g000937																						Capana01g002627
Capana03g004277		Capana07g000027		Capana11g000035		Capana10g000965		Capana03g004350										Capana08g002334		Capana12g002340		Capana08g000954																						Capana01g002631
Capana03g004389		Capana07g000054		Capana11g000036		Capana10g001125		Capana03g004374										Capana08g002386		Capana12g002367		Capana08g000970																						Capana01g002641
Capana03g004440		Capana07g000086		Capana11g000040		Capana10g001137		Capana03g004484										Capana08g002410		Capana12g002475		Capana08g000983																						Capana01g002642
Capana03g004456		Capana07g000165		Capana11g000067		Capana10g001167		Capana03g004529										Capana08g002436		Capana12g002636		Capana08g000991																						Capana01g002676
Capana03g004459		Capana07g000255		Capana11g000068		Capana10g001304		Capana04g000095										Capana08g002439		Capana12g002767		Capana08g001016																						Capana01g002682
Capana03g004532		Capana07g000282		Capana11g000105		Capana10g001446		Capana04g000263										Capana08g002454		Capana12g002856		Capana08g001036																						Capana01g002683
Capana03g004612		Capana07g000430		Capana11g000211		Capana10g001508		Capana04g000297										Capana08g002465				Capana08g001103																						Capana01g002721
Capana03g004623		Capana07g000467		Capana11g000248		Capana10g001656		Capana04g000413										Capana08g002477				Capana08g001111																						Capana01g002730
Capana04g000015		Capana07g000556		Capana11g000262		Capana10g001870		Capana04g000433										Capana08g002688				Capana08g001321																						Capana01g002737
Capana04g000023		Capana07g000557		Capana11g000340		Capana10g001918		Capana04g000586										Capana08g002694				Capana08g001541																						Capana01g002806
Capana04g000034		Capana07g000822		Capana11g000344		Capana10g002068		Capana04g000595										Capana08g002741				Capana08g001616																						Capana01g002814
Capana04g000110		Capana07g000852		Capana11g000613		Capana10g002173		Capana04g000630										Capana09g000006				Capana08g001718																						Capana01g002855
Capana04g000127		Capana07g000875		Capana11g000756		Capana10g002350		Capana04g000720										Capana09g000110				Capana08g001763																						Capana01g002877
Capana04g000239		Capana07g000898		Capana11g000993		Capana11g000144		Capana04g000818										Capana09g000144				Capana08g001895																						Capana01g002890
Capana04g000286		Capana07g000908		Capana11g001105		Capana11g000338		Capana04g000910										Capana09g000174				Capana08g001896																						Capana01g002904
Capana04g000407		Capana07g001015		Capana11g001368		Capana11g000364		Capana04g000953										Capana09g000176				Capana08g002007																						Capana01g002920
Capana04g000425		Capana07g001155		Capana11g001632		Capana11g000426		Capana04g001030										Capana09g000200				Capana08g002012																						Capana01g002960
Capana04g000446		Capana07g001311		Capana11g001647		Capana11g000539		Capana04g001072										Capana09g000386				Capana08g002055																						Capana01g002986
Capana04g000495		Capana07g001399		Capana11g001660		Capana11g000988		Capana04g001125										Capana09g000410				Capana08g002095																						Capana01g003083
Capana04g000590		Capana07g001537		Capana11g001904		Capana11g001015		Capana04g001162										Capana09g000645				Capana08g002097																						Capana01g003085
Capana04g000599		Capana07g001653		Capana11g002257		Capana11g001120		Capana04g001196										Capana09g000656				Capana08g002098																						Capana01g003090
Capana04g000649		Capana07g001674		Capana12g000193		Capana11g001298		Capana04g001225										Capana09g000728				Capana08g002099																						Capana01g003120
Capana04g000757		Capana07g001689		Capana12g000232		Capana11g001410		Capana04g001336										Capana09g001009				Capana08g002100																						Capana01g003137
Capana04g000763		Capana07g001711		Capana12g000287		Capana11g001485		Capana04g001399										Capana09g001112				Capana08g002141																						Capana01g003178
Capana04g000814		Capana07g001743		Capana12g000546		Capana11g001564		Capana04g001415										Capana09g001346				Capana08g002266																						Capana01g003202
Capana04g000823		Capana07g001799		Capana12g000981		Capana11g001913		Capana04g001500										Capana09g001569				Capana08g002398																						Capana01g003299
Capana04g000912		Capana07g001873		Capana12g001018		Capana11g001995		Capana04g001527										Capana09g001593				Capana08g002441																						Capana01g003346
Capana04g001003		Capana07g001883		Capana12g001035		Capana11g002198		Capana04g001573										Capana09g001828				Capana08g002507																						Capana01g003347
Capana04g001004		Capana07g001884		Capana12g001196		Capana11g002247		Capana04g001627										Capana09g001849				Capana08g002624																						Capana01g003356
Capana04g001006		Capana07g001887		Capana12g001207		Capana11g002353		Capana04g001661										Capana09g002159				Capana08g002641																						Capana01g003380
Capana04g001007		Capana07g001954		Capana12g001284		Capana11g002390		Capana04g001693										Capana09g002213				Capana08g002677																						Capana01g003383
Capana04g001008		Capana07g001987		Capana12g001285		Capana12g000001		Capana04g001746										Capana09g002358				Capana08g002744																						Capana01g003392
Capana04g001103		Capana07g002094		Capana12g001292		Capana12g000077		Capana04g001823										Capana09g002411				Capana08g002776																						Capana01g003397
Capana04g001209		Capana07g002106		Capana12g001829		Capana12g000079		Capana04g001865										Capana10g000025				Capana08g002809																						Capana01g003445
Capana04g001253		Capana07g002124		Capana12g002244		Capana12g000098		Capana04g001895										Capana10g000048				Capana09g000120																						Capana01g003486
Capana04g001312		Capana07g002259		Capana12g002284		Capana12g000117		Capana04g001955										Capana10g000055				Capana09g000141																						Capana01g003516
Capana04g001398		Capana07g002279		Capana12g002314		Capana12g000120		Capana04g001985										Capana10g000094				Capana09g000221																						Capana01g003533
Capana04g001455		Capana07g002300		Capana12g002472		Capana12g000205		Capana04g002342										Capana10g000212				Capana09g000427	pAMT-D2																					Capana01g003577
Capana04g001542		Capana07g002325		Capana12g002508		Capana12g000228		Capana04g002351										Capana10g000223				Capana09g000733																						Capana01g003593
Capana04g001608		Capana07g002394		Capana12g002639		Capana12g000245		Capana04g002445										Capana10g000275				Capana09g000751																						Capana01g003612
Capana04g001611		Capana07g002429		Capana12g002828		Capana12g000359		Capana04g002826										Capana10g000555				Capana09g001148																						Capana01g003633
Capana04g001613		Capana07g002444		Capana12g002836		Capana12g000685		Capana04g002843										Capana10g000584				Capana09g001165																						Capana01g003644
Capana04g001674		Capana07g002468				Capana12g000894		Capana04g002887										Capana10g000704				Capana09g001478																						Capana01g003655
Capana04g001808		Capana07g002474				Capana12g000930		Capana05g000049										Capana10g000718				Capana09g001679																						Capana01g003670
Capana04g001818		Capana07g002484				Capana12g000936		Capana05g000065										Capana10g000837				Capana09g001881																						Capana01g003718
Capana04g001862		Capana07g002506				Capana12g001134		Capana05g000080										Capana10g000878				Capana09g001886																						Capana01g003720
Capana04g001916		Capana08g000070				Capana12g002066		Capana05g000288										Capana10g001341				Capana09g001911																						Capana01g003723
Capana04g002044		Capana08g000109				Capana12g002137		Capana05g000313										Capana10g001799				Capana09g001925																						Capana01g003735
Capana04g002168		Capana08g000137				Capana12g002267		Capana05g000374										Capana10g001855				Capana09g002063																						Capana01g003760
Capana04g002290		Capana08g000138				Capana12g002269		Capana05g000464										Capana10g001951				Capana09g002161																						Capana01g003802
Capana04g002408		Capana08g000292				Capana12g002326		Capana05g000493										Capana10g002130				Capana09g002162																						Capana01g003827
Capana04g002625		Capana08g000875				Capana12g002727		Capana05g000535										Capana10g002239				Capana09g002184																						Capana01g003860
Capana04g002643		Capana08g000876				Capana12g002788		Capana05g000579										Capana10g002329				Capana09g002303																						Capana01g003897
Capana04g002845		Capana08g000878				Capana12g002816		Capana05g000770										Capana10g002474				Capana09g002412																						Capana01g003906
Capana05g000022		Capana08g000988				Capana12g002859		Capana05g000782										Capana11g000072				Capana09g002427																						Capana01g003908
Capana05g000099		Capana08g001090						Capana05g000848										Capana11g000135				Capana10g000033																						Capana01g003927
Capana05g000102		Capana08g001094						Capana05g000890										Capana11g000146				Capana10g000109																						Capana01g003941
Capana05g000111		Capana08g001155						Capana05g000932										Capana11g000244				Capana10g000124																						Capana01g003958
Capana05g000149		Capana08g001165						Capana05g001067										Capana11g000365				Capana10g000134																						Capana01g003977
Capana05g000154		Capana08g001237						Capana05g001203										Capana11g000431				Capana10g000310																						Capana01g003980
Capana05g000210		Capana08g001314						Capana05g001409										Capana11g000467				Capana10g000544																						Capana01g003983
Capana05g000250		Capana08g001323						Capana05g001465										Capana11g001541				Capana10g000571																						Capana01g004034
Capana05g000287		Capana08g001429						Capana05g001467										Capana11g001544				Capana10g000587																						Capana01g004056
Capana05g000353		Capana08g001476						Capana05g001496										Capana11g001709				Capana10g001080																						Capana01g004063
Capana05g000433		Capana08g001607						Capana05g001555										Capana11g001867				Capana10g001194																						Capana01g004067
Capana05g000468		Capana08g001782						Capana05g001735										Capana11g001924				Capana10g001389																						Capana01g004119
Capana05g000482		Capana08g001833						Capana05g001790										Capana11g001943				Capana10g001459																						Capana01g004122
Capana05g000680		Capana08g002002						Capana05g001796										Capana11g002071				Capana10g001551																						Capana01g004227
Capana05g000763		Capana08g002003						Capana05g001810										Capana11g002135				Capana10g001566																						Capana01g004249
Capana05g000947		Capana08g002006						Capana05g001863										Capana11g002139				Capana10g001749																						Capana01g004268
Capana05g001066		Capana08g002033						Capana05g001909										Capana11g002192				Capana10g001809																						Capana01g004270
Capana05g001104		Capana08g002046						Capana05g001923										Capana11g002264				Capana10g001865																						Capana01g004288
Capana05g001109		Capana08g002142						Capana05g002049										Capana12g000014				Capana10g001907																						Capana01g004362
Capana05g001124		Capana08g002143						Capana05g002203										Capana12g000049				Capana10g001997																						Capana01g004370
Capana05g001133		Capana08g002157						Capana05g002241										Capana12g000140				Capana10g002132																						Capana01g004379
Capana05g001188		Capana08g002251						Capana05g002328										Capana12g000145				Capana10g002142																						Capana01g004387
Capana05g001269		Capana08g002306						Capana05g002348										Capana12g000292				Capana10g002143																						Capana01g004395
Capana05g001307		Capana08g002323						Capana05g002495										Capana12g000399				Capana10g002156																						Capana01g004430
Capana05g001702		Capana08g002555						Capana05g002500										Capana12g000438				Capana10g002214																						Capana01g004459
Capana05g001759		Capana08g002737						Capana05g002547										Capana12g000473				Capana10g002256																						Capana01g004468
Capana05g001805		Capana09g000050						Capana06g000012										Capana12g000497				Capana10g002319																						Capana01g004474
Capana05g001892		Capana09g000097						Capana06g000025										Capana12g000520				Capana10g002382																						Capana02g000023
Capana05g001981		Capana09g000220						Capana06g000050										Capana12g000572				Capana10g002504																						Capana02g000055
Capana05g001985		Capana09g000281						Capana06g000144										Capana12g000664				Capana11g000013																						Capana02g000064
Capana05g001995		Capana09g000320						Capana06g000149										Capana12g000777				Capana11g000090																						Capana02g000072
Capana05g002040		Capana09g000342						Capana06g000174										Capana12g001288				Capana11g000201																						Capana02g000082
Capana05g002051		Capana09g000343						Capana06g000255										Capana12g001405				Capana11g000255																						Capana02g000136
Capana05g002074		Capana09g000404						Capana06g000259										Capana12g001848				Capana11g000393																						Capana02g000138
Capana05g002250		Capana09g000421						Capana06g000349										Capana12g002030				Capana11g000428																						Capana02g000189
Capana05g002402		Capana09g000629						Capana06g000358										Capana12g002146				Capana11g000438																						Capana02g000206
Capana05g002420		Capana09g000936						Capana06g000415										Capana12g002257				Capana11g000658																						Capana02g000212
Capana05g002450		Capana09g001079						Capana06g000606										Capana12g002356				Capana11g000730																						Capana02g000217
Capana05g002462		Capana09g001086						Capana06g000696										Capana12g002400				Capana11g000872																						Capana02g000218
Capana05g002538		Capana09g001368						Capana06g000756										Capana12g002664				Capana11g001076																						Capana02g000242
Capana05g002551		Capana09g001646						Capana06g000789										Capana12g002686				Capana11g001097																						Capana02g000334
Capana06g000007		Capana09g002033						Capana06g000846										Capana12g002689				Capana11g001227																						Capana02g000339
Capana06g000024		Capana09g002145						Capana06g000899										Capana12g002765				Capana11g001388																						Capana02g000350
Capana06g000146		Capana09g002233						Capana06g001176										Capana12g002795				Capana11g001464																						Capana02g000529
Capana06g000223		Capana09g002241						Capana06g001183										Capana12g002893				Capana11g001580																						Capana02g000540
Capana06g000258		Capana09g002279						Capana06g001237										Capana12g002896				Capana11g001661																						Capana02g000563
Capana06g000342		Capana09g002314						Capana06g001305														Capana11g001877																						Capana02g000614
Capana06g000353		Capana09g002325						Capana06g001344														Capana11g001963																						Capana02g000700
Capana06g000390		Capana09g002327						Capana06g001495														Capana11g002032																						Capana02g000737
Capana06g000551		Capana09g002334						Capana06g001601														Capana11g002179																						Capana02g000742
Capana06g000617		Capana09g002370						Capana06g001873														Capana11g002212																						Capana02g000748
Capana06g000767		Capana09g002398						Capana06g001955														Capana11g002330																						Capana02g000794
Capana06g000932		Capana10g000080						Capana06g002057														Capana11g002375																						Capana02g000829
Capana06g000942		Capana10g000158						Capana06g002091														Capana12g000051																						Capana02g000892
Capana06g000987		Capana10g000252						Capana06g002228														Capana12g000115																						Capana02g000899
Capana06g001110		Capana10g000262						Capana06g002253														Capana12g000210																						Capana02g000938
Capana06g001182		Capana10g000289						Capana06g002254														Capana12g000249																						Capana02g001005
Capana06g001236		Capana10g000311						Capana06g002305														Capana12g000259																						Capana02g001026
Capana06g001343		Capana10g000325						Capana06g002634														Capana12g000327																						Capana02g001031
Capana06g001415		Capana10g000378						Capana06g002649														Capana12g000414																						Capana02g001033
Capana06g001497		Capana10g000388						Capana06g002692														Capana12g000464																						Capana02g001049
Capana06g001506		Capana10g000476						Capana06g002698														Capana12g000479																						Capana02g001103
Capana06g001511		Capana10g000499						Capana06g002716														Capana12g000555																						Capana02g001150
Capana06g001517		Capana10g000531						Capana06g002808														Capana12g000601																						Capana02g001193
Capana06g001547		Capana10g000808						Capana06g002901														Capana12g000625																						Capana02g001283
Capana06g001548		Capana10g000873						Capana06g003013														Capana12g000902																						Capana02g001300
Capana06g001632		Capana10g001051						Capana06g003028														Capana12g001120																						Capana02g001322
Capana06g001636		Capana10g001192						Capana06g003029														Capana12g001164																						Capana02g001342
Capana06g001641		Capana10g001528						Capana06g003038														Capana12g001178																						Capana02g001347
Capana06g001814		Capana10g001550						Capana06g003082														Capana12g001260																						Capana02g001366
Capana06g001819		Capana10g001659						Capana06g003085														Capana12g001683																						Capana02g001389
Capana06g001951		Capana10g001722						Capana07g000123														Capana12g001746																						Capana02g001394
Capana06g001967		Capana10g001774						Capana07g000190														Capana12g001807																						Capana02g001399
Capana06g002255		Capana10g001790						Capana07g000191														Capana12g002221																						Capana02g001421
Capana06g002288		Capana10g001847						Capana07g000257														Capana12g002265																						Capana02g001426
Capana06g002292		Capana10g001881						Capana07g000485														Capana12g002655																						Capana02g001432
Capana06g002411		Capana10g001938						Capana07g000491														Capana12g002701																						Capana02g001435
Capana06g002562		Capana10g001975						Capana07g000642														Capana12g002711																						Capana02g001450
Capana06g002792		Capana10g002008						Capana07g000653														Capana12g002758																						Capana02g001465
Capana06g002913		Capana10g002043						Capana07g000703														Capana12g002831																						Capana02g001505
Capana06g002995		Capana10g002150						Capana07g000758														Capana12g002837																						Capana02g001542
Capana06g003010		Capana10g002154						Capana07g000776														Capana12g002912																						Capana02g001557
Capana07g000087		Capana10g002168						Capana07g000888																																				Capana02g001572
Capana07g000146		Capana10g002229						Capana07g000904																																				Capana02g001579
Capana07g000149		Capana10g002389						Capana07g000984																																				Capana02g001584
Capana07g000201		Capana10g002483						Capana07g000997																																				Capana02g001590
Capana07g000207		Capana10g002484						Capana07g001003																																				Capana02g001602
Capana07g000305		Capana11g000057						Capana07g001083																																				Capana02g001650
Capana07g000316		Capana11g000116						Capana07g001092																																				Capana02g001657
Capana07g000317		Capana11g000210						Capana07g001259																																				Capana02g001684
Capana07g000330		Capana11g000235						Capana07g001293																																				Capana02g001708
Capana07g000363		Capana11g000260						Capana07g001325																																				Capana02g001743
Capana07g000394		Capana11g000300						Capana07g001334																																				Capana02g001754
Capana07g000440		Capana11g000350						Capana07g001442																																				Capana02g001767
Capana07g000461		Capana11g000390						Capana07g001508																																				Capana02g001806
Capana07g000528		Capana11g000442						Capana07g001700																																				Capana02g001807
Capana07g000601		Capana11g000472						Capana07g001820																																				Capana02g001812
Capana07g000612		Capana11g000508						Capana07g001827																																				Capana02g001829
Capana07g000750		Capana11g000734						Capana07g001961																																				Capana02g001832
Capana07g000909		Capana11g000990						Capana07g002077																																				Capana02g001833
Capana07g001079		Capana11g001000						Capana07g002114																																				Capana02g001844
Capana07g001124		Capana11g001070						Capana07g002192																																				Capana02g001859
Capana07g001287		Capana11g001106						Capana07g002282																																				Capana02g001867
Capana07g001302		Capana11g001511						Capana08g000073																																				Capana02g001918
Capana07g001575		Capana11g001512						Capana08g000084																																				Capana02g001935
Capana07g001590		Capana11g001566						Capana08g000160																																				Capana02g001960
Capana07g001630		Capana11g001631						Capana08g000228																																				Capana02g001970
Capana07g001693		Capana11g001783						Capana08g000382																																				Capana02g001993
Capana07g001716		Capana11g001890						Capana08g000388																																				Capana02g002002
Capana07g001795		Capana11g001999						Capana08g000412																																				Capana02g002018
Capana07g001803		Capana11g002148						Capana08g000419																																				Capana02g002070
Capana07g001867		Capana11g002311						Capana08g000476																																				Capana02g002072
Capana07g001904		Capana11g002389						Capana08g000495																																				Capana02g002098
Capana07g002013		Capana11g002397						Capana08g000549																																				Capana02g002130
Capana07g002107		Capana12g000031						Capana08g000626																																				Capana02g002154
Capana07g002157		Capana12g000032						Capana08g000662																																				Capana02g002157
Capana07g002194		Capana12g000152						Capana08g000712																																				Capana02g002159
Capana07g002280		Capana12g000183						Capana08g000727																																				Capana02g002162
Capana07g002362		Capana12g000209						Capana08g000739																																				Capana02g002164
Capana07g002385		Capana12g000256						Capana08g000753																																				Capana02g002178
Capana07g002476		Capana12g000325						Capana08g000797																																				Capana02g002180
Capana07g002487		Capana12g000447						Capana08g000871																																				Capana02g002191
Capana08g000065		Capana12g000482						Capana08g000888																																				Capana02g002209
Capana08g000095		Capana12g000591						Capana08g000914																																				Capana02g002219
Capana08g000107		Capana12g000788						Capana08g000933																																				Capana02g002254
Capana08g000129		Capana12g001030						Capana08g000982																																				Capana02g002263
Capana08g000145		Capana12g001087						Capana08g000995																																				Capana02g002278
Capana08g000221		Capana12g001321						Capana08g001023																																				Capana02g002280
Capana08g000223		Capana12g001341						Capana08g001199																																				Capana02g002346
Capana08g000275		Capana12g001823						Capana08g001216																																				Capana02g002373
Capana08g000304		Capana12g002067						Capana08g001217																																				Capana02g002377
Capana08g000316		Capana12g002160						Capana08g001231																																				Capana02g002383
Capana08g000319		Capana12g002385						Capana08g001232																																				Capana02g002393
Capana08g000360		Capana12g002416						Capana08g001247																																				Capana02g002440
Capana08g000386		Capana12g002430						Capana08g001273																																				Capana02g002442
Capana08g000430		Capana12g002663						Capana08g001424																																				Capana02g002461
Capana08g000767		Capana12g002667						Capana08g001452																																				Capana02g002463
Capana08g000786		Capana12g002819						Capana08g001504																																				Capana02g002508
Capana08g000853		Capana12g002835						Capana08g001515																																				Capana02g002522
Capana08g000894		Capana12g002886						Capana08g001601																																				Capana02g002528
Capana08g001065		Capana12g002888						Capana08g001602																																				Capana02g002545
Capana08g001086								Capana08g001717																																				Capana02g002556
Capana08g001119								Capana08g001755																																				Capana02g002557
Capana08g001184								Capana08g001817																																				Capana02g002558
Capana08g001185								Capana08g002189																																				Capana02g002564
Capana08g001194								Capana08g002363																																				Capana02g002568
Capana08g001316								Capana08g002672																																				Capana02g002589
Capana08g001342								Capana08g002801																																				Capana02g002616
Capana08g001367								Capana08g002831																																				Capana02g002648
Capana08g001370								Capana08g002834																																				Capana02g002667
Capana08g001374								Capana08g002853																																				Capana02g002681
Capana08g001380								Capana08g002854																																				Capana02g002689
Capana08g001410								Capana09g000008																																				Capana02g002714
Capana08g001462								Capana09g000017																																				Capana02g002720
Capana08g001475								Capana09g000051																																				Capana02g002721
Capana08g001508								Capana09g000060																																				Capana02g002722
Capana08g001512								Capana09g000083																																				Capana02g002748
Capana08g001520								Capana09g000108																																				Capana02g002758
Capana08g001558								Capana09g000132																																				Capana02g002762
Capana08g001575								Capana09g000217																																				Capana02g002784
Capana08g001702								Capana09g000237																																				Capana02g002788
Capana08g001704								Capana09g000264																																				Capana02g002797
Capana08g001771								Capana09g000358																																				Capana02g002805
Capana08g001780								Capana09g000453																																				Capana02g002825
Capana08g001794								Capana09g000454																																				Capana02g002899
Capana08g001931								Capana09g000467																																				Capana02g002949
Capana08g002036								Capana09g000624																																				Capana02g002956
Capana08g002064								Capana09g000648																																				Capana02g002967
Capana08g002110								Capana09g000767																																				Capana02g002972
Capana08g002268								Capana09g000799																																				Capana02g002979
Capana08g002336								Capana09g000815																																				Capana02g002985
Capana08g002357								Capana09g000825																																				Capana02g002992
Capana08g002361								Capana09g000890																																				Capana02g002998
Capana08g002374								Capana09g000975																																				Capana02g003018
Capana08g002456								Capana09g000986																																				Capana02g003042
Capana08g002472								Capana09g001083																																				Capana02g003044
Capana08g002489								Capana09g001095																																				Capana02g003057
Capana08g002509								Capana09g001146																																				Capana02g003064
Capana08g002543								Capana09g001193																																				Capana02g003081
Capana08g002591								Capana09g001302																																				Capana02g003093
Capana08g002598								Capana09g001336																																				Capana02g003096
Capana08g002601								Capana09g001428																																				Capana02g003107
Capana08g002615								Capana09g001524																																				Capana02g003113
Capana08g002758								Capana09g001608																																				Capana02g003123
Capana08g002790								Capana09g001704																																				Capana02g003127
Capana08g002793								Capana09g001745																																				Capana02g003129
Capana08g002795								Capana09g001767																																				Capana02g003134
Capana09g000010								Capana09g001802																																				Capana02g003153
Capana09g000065								Capana09g001830																																				Capana02g003158
Capana09g000122								Capana09g001840																																				Capana02g003179
Capana09g000140	KasI-D8							Capana09g001963																																				Capana02g003197
Capana09g000181								Capana09g002215																																				Capana02g003203
Capana09g000290								Capana10g000039																																				Capana02g003208
Capana09g000443								Capana10g000197																																				Capana02g003211
Capana09g000462								Capana10g000260																																				Capana02g003225
Capana09g000555								Capana10g000266																																				Capana02g003274
Capana09g000594								Capana10g000297																																				Capana02g003275
Capana09g000661								Capana10g000315																																				Capana02g003277
Capana09g000688								Capana10g000354																																				Capana02g003279
Capana09g000710								Capana10g000590																																				Capana02g003281
Capana09g000725								Capana10g000615																																				Capana02g003283
Capana09g000756								Capana10g000675																																				Capana02g003310
Capana09g000789								Capana10g001011																																				Capana02g003320
Capana09g000822								Capana10g001079																																				Capana02g003329
Capana09g000840								Capana10g001191																																				Capana02g003335
Capana09g000876								Capana10g001211																																				Capana02g003340
Capana09g001054								Capana10g001305																																				Capana02g003358
Capana09g001224								Capana10g001370																																				Capana02g003367
Capana09g001251								Capana10g001390																																				Capana02g003369
Capana09g001260								Capana10g001423																																				Capana02g003379
Capana09g001458								Capana10g001478																																				Capana02g003380
Capana09g001505								Capana10g001490																																				Capana02g003400
Capana09g001597								Capana10g001517																																				Capana02g003425
Capana09g001610								Capana10g001661																																				Capana02g003433
Capana09g001631								Capana10g001724																																				Capana02g003466
Capana09g001647								Capana10g001814																																				Capana02g003475
Capana09g001737								Capana10g001818																																				Capana02g003477
Capana09g001749								Capana10g001854																																				Capana02g003484
Capana09g001774								Capana10g001876																																				Capana02g003515
Capana09g001788								Capana10g002128																																				Capana02g003517
Capana09g002037								Capana10g002222																																				Capana02g003544
Capana09g002178								Capana10g002253																																				Capana02g003551
Capana09g002196								Capana10g002383																																				Capana02g003563
Capana09g002216								Capana11g000010																																				Capana02g003580
Capana09g002231								Capana11g000024																																				Capana02g003615
Capana09g002369								Capana11g000166																																				Capana02g003628
Capana09g002372								Capana11g000173																																				Capana02g003637
Capana09g002414								Capana11g000333																																				Capana02g003650
Capana09g002439								Capana11g000423																																				Capana02g003669
Capana10g000064								Capana11g000551																																				Capana03g000092
Capana10g000108								Capana11g000887																																				Capana03g000108
Capana10g000143								Capana11g001021																																				Capana03g000128
Capana10g000191								Capana11g001061																																				Capana03g000135
Capana10g000193								Capana11g001062																																				Capana03g000153
Capana10g000195								Capana11g001121																																				Capana03g000156
Capana10g000277								Capana11g001136																																				Capana03g000163
Capana10g000291								Capana11g001317																																				Capana03g000166
Capana10g000345								Capana11g001338																																				Capana03g000175
Capana10g000549								Capana11g001354																																				Capana03g000176
Capana10g000593								Capana11g001366																																				Capana03g000178
Capana10g000627								Capana11g001398																																				Capana03g000195
Capana10g000740								Capana11g001404																																				Capana03g000204
Capana10g000741								Capana11g001428																																				Capana03g000223
Capana10g000788								Capana11g001546																																				Capana03g000243
Capana10g000809								Capana11g001649																																				Capana03g000244
Capana10g000810								Capana11g001652																																				Capana03g000254
Capana10g000850								Capana11g001899																																				Capana03g000256
Capana10g001059								Capana11g001967																																				Capana03g000265
Capana10g001171								Capana11g001968																																				Capana03g000270
Capana10g001216								Capana11g002077																																				Capana03g000302
Capana10g001266								Capana11g002143																																				Capana03g000314
Capana10g001324								Capana11g002159																																				Capana03g000323
Capana10g001334								Capana11g002213																																				Capana03g000333
Capana10g001354								Capana11g002239																																				Capana03g000335
Capana10g001451								Capana11g002244																																				Capana03g000339
Capana10g001456								Capana11g002256																																				Capana03g000350
Capana10g001598								Capana11g002323																																				Capana03g000356
Capana10g001609								Capana12g000004																																				Capana03g000357
Capana10g001654								Capana12g000105																																				Capana03g000366
Capana10g001703								Capana12g000197																																				Capana03g000379
Capana10g001842								Capana12g000201																																				Capana03g000414
Capana10g002038								Capana12g000255																																				Capana03g000428
Capana10g002064								Capana12g000339																																				Capana03g000436
Capana10g002083								Capana12g000395																																				Capana03g000438
Capana10g002251								Capana12g000406																																				Capana03g000501
Capana10g002424								Capana12g000440																																				Capana03g000520
Capana10g002495								Capana12g000458																																				Capana03g000522
Capana11g000095								Capana12g000528																																				Capana03g000541
Capana11g000130								Capana12g000573																																				Capana03g000544
Capana11g000131								Capana12g000622																																				Capana03g000568
Capana11g000156								Capana12g000626																																				Capana03g000645
Capana11g000180								Capana12g000631																																				Capana03g000681
Capana11g000242								Capana12g000952																																				Capana03g000700
Capana11g000243								Capana12g001094																																				Capana03g000701
Capana11g000422								Capana12g001158																																				Capana03g000724
Capana11g000459								Capana12g001214																																				Capana03g000731
Capana11g000507								Capana12g001289																																				Capana03g000732
Capana11g000553								Capana12g001350																																				Capana03g000734
Capana11g000573								Capana12g001400																																				Capana03g000737
Capana11g000597								Capana12g001434																																				Capana03g000755
Capana11g000616								Capana12g001471																																				Capana03g000760
Capana11g000628								Capana12g001479																																				Capana03g000762
Capana11g000655								Capana12g001628																																				Capana03g000765
Capana11g000817								Capana12g001730																																				Capana03g000783
Capana11g001014								Capana12g001863																																				Capana03g000784
Capana11g001016								Capana12g001892																																				Capana03g000800
Capana11g001019								Capana12g001951																																				Capana03g000811
Capana11g001057								Capana12g001959																																				Capana03g000841
Capana11g001122								Capana12g002026																																				Capana03g000846
Capana11g001159								Capana12g002035																																				Capana03g000853
Capana11g001222								Capana12g002216																																				Capana03g000854
Capana11g001268								Capana12g002236																																				Capana03g000859
Capana11g001277								Capana12g002280																																				Capana03g000865
Capana11g001311								Capana12g002310																																				Capana03g000868
Capana11g001348								Capana12g002411																																				Capana03g000891
Capana11g001529								Capana12g002465																																				Capana03g000896
Capana11g001542								Capana12g002530																																				Capana03g000899
Capana11g001622								Capana12g002585																																				Capana03g000905
Capana11g001624								Capana12g002793																																				Capana03g000909
Capana11g001881								Capana12g002794																																				Capana03g000911
Capana11g001894								Capana12g002805																																				Capana03g000915
Capana11g001900								Capana12g002903																																				Capana03g000959
Capana11g001901								Capana12g002919																																				Capana03g000967
Capana11g001954																																												Capana03g000971
Capana11g001970																																												Capana03g000994
Capana11g002037																																												Capana03g000998
Capana11g002190																																												Capana03g000999
Capana11g002204																																												Capana03g001008
Capana11g002235																																												Capana03g001012
Capana11g002270																																												Capana03g001017
Capana11g002298																																												Capana03g001026
Capana11g002306																																												Capana03g001031
Capana11g002307																																												Capana03g001061
Capana11g002356																																												Capana03g001080
Capana11g002395																																												Capana03g001083
Capana12g000037																																												Capana03g001088
Capana12g000133																																												Capana03g001105
Capana12g000136																																												Capana03g001124
Capana12g000251																																												Capana03g001132
Capana12g000289																																												Capana03g001137
Capana12g000797																																												Capana03g001142
Capana12g000882																																												Capana03g001147
Capana12g001177																																												Capana03g001176
Capana12g001225																																												Capana03g001177
Capana12g001276																																												Capana03g001202
Capana12g001317																																												Capana03g001235
Capana12g001343																																												Capana03g001281
Capana12g001393																																												Capana03g001294
Capana12g001403																																												Capana03g001331
Capana12g001441																																												Capana03g001353
Capana12g001472																																												Capana03g001355
Capana12g001476																																												Capana03g001365
Capana12g001492																																												Capana03g001384
Capana12g001497																																												Capana03g001433
Capana12g001535																																												Capana03g001437
Capana12g001621																																												Capana03g001447
Capana12g001639																																												Capana03g001458
Capana12g001649																																												Capana03g001459
Capana12g001651																																												Capana03g001482
Capana12g001657																																												Capana03g001504
Capana12g001690																																												Capana03g001512
Capana12g001725																																												Capana03g001526
Capana12g001930																																												Capana03g001536
Capana12g002027																																												Capana03g001539
Capana12g002042																																												Capana03g001542
Capana12g002043																																												Capana03g001557
Capana12g002053																																												Capana03g001570
Capana12g002192																																												Capana03g001598
Capana12g002251																																												Capana03g001653
Capana12g002319																																												Capana03g001657
Capana12g002327																																												Capana03g001665
Capana12g002555																																												Capana03g001763
Capana12g002700																																												Capana03g001765
Capana12g002764																																												Capana03g001776
Capana12g002785																																												Capana03g001804
Capana12g002789																																												Capana03g001821
Capana12g002832																																												Capana03g001911
Capana12g002833																																												Capana03g001916
Capana12g002864																																												Capana03g001945
																																												Capana03g001966
																																												Capana03g001995
																																												Capana03g002099
																																												Capana03g002101
																																												Capana03g002109
																																												Capana03g002132
																																												Capana03g002178
																																												Capana03g002186
																																												Capana03g002233
																																												Capana03g002234
																																												Capana03g002283
																																												Capana03g002284
																																												Capana03g002310
																																												Capana03g002436
																																												Capana03g002443
																																												Capana03g002466
																																												Capana03g002469
																																												Capana03g002486
																																												Capana03g002487
																																												Capana03g002514
																																												Capana03g002517
																																												Capana03g002556
																																												Capana03g002560
																																												Capana03g002585
																																												Capana03g002608
																																												Capana03g002612
																																												Capana03g002639
																																												Capana03g002693
																																												Capana03g002712
																																												Capana03g002733
																																												Capana03g002734
																																												Capana03g002756
																																												Capana03g002782
																																												Capana03g002795
																																												Capana03g002840
																																												Capana03g002848
																																												Capana03g002904
																																												Capana03g002980
																																												Capana03g002993
																																												Capana03g003033
																																												Capana03g003061
																																												Capana03g003076
																																												Capana03g003119
																																												Capana03g003133
																																												Capana03g003154
																																												Capana03g003227
																																												Capana03g003228
																																												Capana03g003259
																																												Capana03g003335
																																												Capana03g003342
																																												Capana03g003347
																																												Capana03g003353
																																												Capana03g003422
																																												Capana03g003511
																																												Capana03g003539
																																												Capana03g003549
																																												Capana03g003551
																																												Capana03g003613
																																												Capana03g003660
																																												Capana03g003664
																																												Capana03g003665
																																												Capana03g003667
																																												Capana03g003674
																																												Capana03g003675
																																												Capana03g003677
																																												Capana03g003683
																																												Capana03g003684
																																												Capana03g003687
																																												Capana03g003718
																																												Capana03g003730
																																												Capana03g003733
																																												Capana03g003785
																																												Capana03g003793
																																												Capana03g003821
																																												Capana03g003842
																																												Capana03g003878
																																												Capana03g003895
																																												Capana03g003918
																																												Capana03g003925
																																												Capana03g003935
																																												Capana03g003945
																																												Capana03g003980
																																												Capana03g004025
																																												Capana03g004112
																																												Capana03g004186
																																												Capana03g004202
																																												Capana03g004233
																																												Capana03g004239
																																												Capana03g004273
																																												Capana03g004274
																																												Capana03g004288
																																												Capana03g004301
																																												Capana03g004347
																																												Capana03g004390
																																												Capana03g004392
																																												Capana03g004397
																																												Capana03g004585
																																												Capana03g004603
																																												Capana03g004643
																																												Capana04g000012
																																												Capana04g000019
																																												Capana04g000033
																																												Capana04g000039
																																												Capana04g000044
																																												Capana04g000057
																																												Capana04g000066
																																												Capana04g000075
																																												Capana04g000084
																																												Capana04g000113
																																												Capana04g000123
																																												Capana04g000147
																																												Capana04g000158
																																												Capana04g000195
																																												Capana04g000203
																																												Capana04g000204
																																												Capana04g000209
																																												Capana04g000210
																																												Capana04g000229
																																												Capana04g000250
																																												Capana04g000274
																																												Capana04g000275
																																												Capana04g000309
																																												Capana04g000322
																																												Capana04g000328
																																												Capana04g000348
																																												Capana04g000349
																																												Capana04g000350
																																												Capana04g000373
																																												Capana04g000376
																																												Capana04g000382
																																												Capana04g000383
																																												Capana04g000396
																																												Capana04g000401
																																												Capana04g000418
																																												Capana04g000460
																																												Capana04g000476
																																												Capana04g000478
																																												Capana04g000515
																																												Capana04g000532
																																												Capana04g000533
																																												Capana04g000559
																																												Capana04g000573
																																												Capana04g000625
																																												Capana04g000634
																																												Capana04g000637
																																												Capana04g000647
																																												Capana04g000701
																																												Capana04g000712
																																												Capana04g000713
																																												Capana04g000714
																																												Capana04g000739
																																												Capana04g000741
																																												Capana04g000756
																																												Capana04g000778
																																												Capana04g000804
																																												Capana04g000808
																																												Capana04g000812
																																												Capana04g000840
																																												Capana04g000857
																																												Capana04g000871
																																												Capana04g000876
																																												Capana04g000889
																																												Capana04g000900
																																												Capana04g000913
																																												Capana04g000916
																																												Capana04g000917
																																												Capana04g000937
																																												Capana04g000938
																																												Capana04g000966
																																												Capana04g001031
																																												Capana04g001048
																																												Capana04g001050
																																												Capana04g001051
																																												Capana04g001117
																																												Capana04g001119
																																												Capana04g001133
																																												Capana04g001142
																																												Capana04g001218
																																												Capana04g001262
																																												Capana04g001269
																																												Capana04g001277
																																												Capana04g001323
																																												Capana04g001372
																																												Capana04g001402
																																												Capana04g001438
																																												Capana04g001460
																																												Capana04g001593
																																												Capana04g001617
																																												Capana04g001686
																																												Capana04g001716
																																												Capana04g001740
																																												Capana04g001741
																																												Capana04g001846
																																												Capana04g001854
																																												Capana04g001880
																																												Capana04g001931
																																												Capana04g001974
																																												Capana04g001992
																																												Capana04g001993
																																												Capana04g002003
																																												Capana04g002066
																																												Capana04g002087
																																												Capana04g002145
																																												Capana04g002217
																																												Capana04g002232
																																												Capana04g002323
																																												Capana04g002356
																																												Capana04g002357
																																												Capana04g002372
																																												Capana04g002388	CCoAOMT-D8
																																												Capana04g002401
																																												Capana04g002402
																																												Capana04g002459
																																												Capana04g002510
																																												Capana04g002527
																																												Capana04g002529
																																												Capana04g002531
																																												Capana04g002564
																																												Capana04g002593
																																												Capana04g002602
																																												Capana04g002616
																																												Capana04g002689
																																												Capana04g002699
																																												Capana04g002752
																																												Capana04g002766
																																												Capana04g002828
																																												Capana04g002885
																																												Capana04g002890
																																												Capana04g002893
																																												Capana04g002897
																																												Capana05g000006
																																												Capana05g000025
																																												Capana05g000026
																																												Capana05g000042
																																												Capana05g000046
																																												Capana05g000101
																																												Capana05g000105
																																												Capana05g000110
																																												Capana05g000112
																																												Capana05g000116
																																												Capana05g000118
																																												Capana05g000121
																																												Capana05g000125
																																												Capana05g000144
																																												Capana05g000164
																																												Capana05g000187
																																												Capana05g000205
																																												Capana05g000208
																																												Capana05g000216
																																												Capana05g000237
																																												Capana05g000238
																																												Capana05g000282
																																												Capana05g000317
																																												Capana05g000356
																																												Capana05g000365
																																												Capana05g000376
																																												Capana05g000382
																																												Capana05g000386
																																												Capana05g000400
																																												Capana05g000513
																																												Capana05g000519
																																												Capana05g000522
																																												Capana05g000539
																																												Capana05g000544
																																												Capana05g000546
																																												Capana05g000604
																																												Capana05g000642
																																												Capana05g000678
																																												Capana05g000707
																																												Capana05g000733
																																												Capana05g000795
																																												Capana05g000796
																																												Capana05g000827
																																												Capana05g000833
																																												Capana05g000835
																																												Capana05g000855
																																												Capana05g000874
																																												Capana05g000884
																																												Capana05g000895
																																												Capana05g000908
																																												Capana05g000938
																																												Capana05g000959
																																												Capana05g001033
																																												Capana05g001045
																																												Capana05g001083
																																												Capana05g001126
																																												Capana05g001217
																																												Capana05g001263
																																												Capana05g001274
																																												Capana05g001309
																																												Capana05g001319
																																												Capana05g001330
																																												Capana05g001408
																																												Capana05g001495
																																												Capana05g001667
																																												Capana05g001677
																																												Capana05g001768
																																												Capana05g001926
																																												Capana05g001927
																																												Capana05g001984
																																												Capana05g002048
																																												Capana05g002055
																																												Capana05g002095
																																												Capana05g002107
																																												Capana05g002132
																																												Capana05g002166
																																												Capana05g002167
																																												Capana05g002176
																																												Capana05g002192
																																												Capana05g002194
																																												Capana05g002197
																																												Capana05g002243
																																												Capana05g002245
																																												Capana05g002259
																																												Capana05g002281
																																												Capana05g002319
																																												Capana05g002421
																																												Capana05g002458
																																												Capana05g002459
																																												Capana05g002475
																																												Capana05g002496
																																												Capana05g002504
																																												Capana05g002517
																																												Capana05g002544
																																												Capana05g002548
																																												Capana06g000004
																																												Capana06g000029
																																												Capana06g000045
																																												Capana06g000053
																																												Capana06g000090
																																												Capana06g000100
																																												Capana06g000104
																																												Capana06g000124
																																												Capana06g000133
																																												Capana06g000153
																																												Capana06g000158
																																												Capana06g000165
																																												Capana06g000182
																																												Capana06g000201
																																												Capana06g000216
																																												Capana06g000217
																																												Capana06g000229
																																												Capana06g000235
																																												Capana06g000244
																																												Capana06g000267
																																												Capana06g000378
																																												Capana06g000381
																																												Capana06g000384
																																												Capana06g000388
																																												Capana06g000397
																																												Capana06g000406
																																												Capana06g000408
																																												Capana06g000420
																																												Capana06g000436
																																												Capana06g000471
																																												Capana06g000474
																																												Capana06g000487
																																												Capana06g000530
																																												Capana06g000531
																																												Capana06g000563
																																												Capana06g000572
																																												Capana06g000595
																																												Capana06g000598
																																												Capana06g000610
																																												Capana06g000649
																																												Capana06g000656
																																												Capana06g000659
																																												Capana06g000677
																																												Capana06g000681
																																												Capana06g000704
																																												Capana06g000734
																																												Capana06g000742
																																												Capana06g000765
																																												Capana06g000769
																																												Capana06g000772
																																												Capana06g000790
																																												Capana06g000812
																																												Capana06g000828
																																												Capana06g000836
																																												Capana06g000841
																																												Capana06g000842
																																												Capana06g000848
																																												Capana06g000891
																																												Capana06g000938
																																												Capana06g000949
																																												Capana06g000951
																																												Capana06g000961
																																												Capana06g000967
																																												Capana06g000971
																																												Capana06g000977
																																												Capana06g001010
																																												Capana06g001011
																																												Capana06g001013
																																												Capana06g001054
																																												Capana06g001063
																																												Capana06g001096
																																												Capana06g001128
																																												Capana06g001141
																																												Capana06g001149
																																												Capana06g001220
																																												Capana06g001231
																																												Capana06g001248
																																												Capana06g001249
																																												Capana06g001252
																																												Capana06g001269
																																												Capana06g001286
																																												Capana06g001315
																																												Capana06g001364
																																												Capana06g001436
																																												Capana06g001444
																																												Capana06g001464
																																												Capana06g001466
																																												Capana06g001522
																																												Capana06g001528
																																												Capana06g001558
																																												Capana06g001571
																																												Capana06g001675
																																												Capana06g001712
																																												Capana06g001736
																																												Capana06g001740
																																												Capana06g001742
																																												Capana06g001782
																																												Capana06g001830
																																												Capana06g001868
																																												Capana06g001912
																																												Capana06g001962
																																												Capana06g002000
																																												Capana06g002041
																																												Capana06g002067
																																												Capana06g002075
																																												Capana06g002125
																																												Capana06g002177
																																												Capana06g002202
																																												Capana06g002219
																																												Capana06g002225
																																												Capana06g002226
																																												Capana06g002234
																																												Capana06g002313
																																												Capana06g002318
																																												Capana06g002326
																																												Capana06g002333
																																												Capana06g002437
																																												Capana06g002455
																																												Capana06g002518
																																												Capana06g002523
																																												Capana06g002524
																																												Capana06g002547
																																												Capana06g002623
																																												Capana06g002682
																																												Capana06g002757
																																												Capana06g002818
																																												Capana06g002861
																																												Capana06g002876
																																												Capana06g002889
																																												Capana06g002923
																																												Capana06g002958
																																												Capana06g002988
																																												Capana06g002994
																																												Capana06g003020
																																												Capana06g003021
																																												Capana06g003055
																																												Capana06g003074
																																												Capana07g000024
																																												Capana07g000025
																																												Capana07g000038
																																												Capana07g000068
																																												Capana07g000075
																																												Capana07g000078
																																												Capana07g000079
																																												Capana07g000097
																																												Capana07g000107
																																												Capana07g000176
																																												Capana07g000205
																																												Capana07g000210
																																												Capana07g000227
																																												Capana07g000240
																																												Capana07g000270
																																												Capana07g000352
																																												Capana07g000377
																																												Capana07g000945
																																												Capana07g001009
																																												Capana07g001010
																																												Capana07g001101
																																												Capana07g001115
																																												Capana07g001120
																																												Capana07g001150
																																												Capana07g001180
																																												Capana07g001296
																																												Capana07g001336
																																												Capana07g001346
																																												Capana07g001384
																																												Capana07g001390
																																												Capana07g001430
																																												Capana07g001443
																																												Capana07g001476
																																												Capana07g001480
																																												Capana07g001481
																																												Capana07g001557
																																												Capana07g001670
																																												Capana07g001679
																																												Capana07g001696
																																												Capana07g001753
																																												Capana07g001787
																																												Capana07g001789
																																												Capana07g001801
																																												Capana07g001824
																																												Capana07g001835
																																												Capana07g001836
																																												Capana07g001842
																																												Capana07g001843
																																												Capana07g001893
																																												Capana07g001915
																																												Capana07g001917
																																												Capana07g001922
																																												Capana07g001962
																																												Capana07g001963
																																												Capana07g001969
																																												Capana07g001975
																																												Capana07g001982
																																												Capana07g002002
																																												Capana07g002022
																																												Capana07g002039
																																												Capana07g002041
																																												Capana07g002046
																																												Capana07g002048
																																												Capana07g002049
																																												Capana07g002053
																																												Capana07g002082
																																												Capana07g002089
																																												Capana07g002098
																																												Capana07g002101
																																												Capana07g002111
																																												Capana07g002116
																																												Capana07g002129
																																												Capana07g002139
																																												Capana07g002142
																																												Capana07g002167
																																												Capana07g002171
																																												Capana07g002180
																																												Capana07g002185
																																												Capana07g002189
																																												Capana07g002197
																																												Capana07g002225
																																												Capana07g002232
																																												Capana07g002239
																																												Capana07g002256
																																												Capana07g002271
																																												Capana07g002314
																																												Capana07g002322
																																												Capana07g002335
																																												Capana07g002346
																																												Capana07g002371
																																												Capana07g002372
																																												Capana07g002373
																																												Capana07g002384
																																												Capana07g002399
																																												Capana07g002401
																																												Capana07g002427
																																												Capana07g002434
																																												Capana07g002438
																																												Capana07g002507
																																												Capana08g000008
																																												Capana08g000062
																																												Capana08g000067
																																												Capana08g000075
																																												Capana08g000077
																																												Capana08g000081
																																												Capana08g000106
																																												Capana08g000111
																																												Capana08g000157
																																												Capana08g000169
																																												Capana08g000202
																																												Capana08g000339
																																												Capana08g000366
																																												Capana08g000418
																																												Capana08g000433
																																												Capana08g000462
																																												Capana08g000464
																																												Capana08g000468
																																												Capana08g000516
																																												Capana08g000593
																																												Capana08g000597
																																												Capana08g000602
																																												Capana08g000603
																																												Capana08g000605
																																												Capana08g000665
																																												Capana08g000706
																																												Capana08g000709
																																												Capana08g000749
																																												Capana08g000819
																																												Capana08g000864
																																												Capana08g000907
																																												Capana08g000926
																																												Capana08g000931
																																												Capana08g000965
																																												Capana08g001020
																																												Capana08g001042
																																												Capana08g001068
																																												Capana08g001098
																																												Capana08g001100
																																												Capana08g001124
																																												Capana08g001130
																																												Capana08g001160
																																												Capana08g001167
																																												Capana08g001169
																																												Capana08g001180
																																												Capana08g001195
																																												Capana08g001197
																																												Capana08g001202
																																												Capana08g001235
																																												Capana08g001251
																																												Capana08g001259
																																												Capana08g001263
																																												Capana08g001265
																																												Capana08g001266
																																												Capana08g001358
																																												Capana08g001393
																																												Capana08g001395
																																												Capana08g001420
																																												Capana08g001422
																																												Capana08g001434
																																												Capana08g001454
																																												Capana08g001459
																																												Capana08g001460
																																												Capana08g001465
																																												Capana08g001472
																																												Capana08g001482
																																												Capana08g001499
																																												Capana08g001514
																																												Capana08g001521
																																												Capana08g001547
																																												Capana08g001560
																																												Capana08g001565
																																												Capana08g001592
																																												Capana08g001593
																																												Capana08g001632
																																												Capana08g001653
																																												Capana08g001660
																																												Capana08g001661
																																												Capana08g001662
																																												Capana08g001671
																																												Capana08g001688
																																												Capana08g001690
																																												Capana08g001713
																																												Capana08g001716
																																												Capana08g001721
																																												Capana08g001722
																																												Capana08g001733
																																												Capana08g001762
																																												Capana08g001799
																																												Capana08g001823
																																												Capana08g001838
																																												Capana08g001842
																																												Capana08g001855
																																												Capana08g001871
																																												Capana08g001875
																																												Capana08g001887
																																												Capana08g001888
																																												Capana08g001925
																																												Capana08g002001
																																												Capana08g002005
																																												Capana08g002058
																																												Capana08g002111
																																												Capana08g002112
																																												Capana08g002113
																																												Capana08g002139
																																												Capana08g002166
																																												Capana08g002188
																																												Capana08g002241
																																												Capana08g002244
																																												Capana08g002248
																																												Capana08g002274
																																												Capana08g002318
																																												Capana08g002328
																																												Capana08g002358
																																												Capana08g002359
																																												Capana08g002375
																																												Capana08g002395
																																												Capana08g002455
																																												Capana08g002466
																																												Capana08g002478
																																												Capana08g002481
																																												Capana08g002493
																																												Capana08g002494
																																												Capana08g002500
																																												Capana08g002520
																																												Capana08g002521
																																												Capana08g002542
																																												Capana08g002562
																																												Capana08g002564
																																												Capana08g002579
																																												Capana08g002582
																																												Capana08g002594
																																												Capana08g002606
																																												Capana08g002670
																																												Capana08g002679
																																												Capana08g002704
																																												Capana08g002706
																																												Capana08g002709
																																												Capana08g002713
																																												Capana08g002736
																																												Capana08g002739
																																												Capana08g002748
																																												Capana08g002757
																																												Capana08g002812
																																												Capana08g002818
																																												Capana08g002823
																																												Capana09g000011
																																												Capana09g000030
																																												Capana09g000032
																																												Capana09g000038
																																												Capana09g000041
																																												Capana09g000053
																																												Capana09g000078
																																												Capana09g000084
																																												Capana09g000092
																																												Capana09g000126
																																												Capana09g000127
																																												Capana09g000137
																																												Capana09g000149
																																												Capana09g000163
																																												Capana09g000177
																																												Capana09g000189
																																												Capana09g000197
																																												Capana09g000201
																																												Capana09g000212
																																												Capana09g000231
																																												Capana09g000233
																																												Capana09g000243
																																												Capana09g000287
																																												Capana09g000298
																																												Capana09g000299
																																												Capana09g000300
																																												Capana09g000305
																																												Capana09g000401
																																												Capana09g000444
																																												Capana09g000449
																																												Capana09g000561
																																												Capana09g000620
																																												Capana09g000635
																																												Capana09g000644
																																												Capana09g000682
																																												Capana09g000699
																																												Capana09g000707
																																												Capana09g000871
																																												Capana09g000878
																																												Capana09g000903
																																												Capana09g001001
																																												Capana09g001041
																																												Capana09g001043
																																												Capana09g001087
																																												Capana09g001097
																																												Capana09g001107
																																												Capana09g001115
																																												Capana09g001138
																																												Capana09g001195
																																												Capana09g001256
																																												Capana09g001335
																																												Capana09g001388
																																												Capana09g001463
																																												Capana09g001464
																																												Capana09g001488
																																												Capana09g001535
																																												Capana09g001555
																																												Capana09g001568
																																												Capana09g001576
																																												Capana09g001578
																																												Capana09g001579
																																												Capana09g001581
																																												Capana09g001586
																																												Capana09g001587
																																												Capana09g001595
																																												Capana09g001689
																																												Capana09g001728
																																												Capana09g001738
																																												Capana09g001750
																																												Capana09g001754
																																												Capana09g001776
																																												Capana09g001823
																																												Capana09g001829
																																												Capana09g001831
																																												Capana09g001839
																																												Capana09g001964
																																												Capana09g001977
																																												Capana09g001989
																																												Capana09g002011
																																												Capana09g002040
																																												Capana09g002081
																																												Capana09g002086
																																												Capana09g002090
																																												Capana09g002100
																																												Capana09g002102
																																												Capana09g002106
																																												Capana09g002205
																																												Capana09g002235
																																												Capana09g002242
																																												Capana09g002276
																																												Capana09g002341
																																												Capana09g002349
																																												Capana09g002378
																																												Capana09g002386
																																												Capana09g002389
																																												Capana09g002423
																																												Capana09g002434
																																												Capana10g000011
																																												Capana10g000061
																																												Capana10g000065
																																												Capana10g000079
																																												Capana10g000125
																																												Capana10g000171
																																												Capana10g000176
																																												Capana10g000204
																																												Capana10g000218
																																												Capana10g000221
																																												Capana10g000253
																																												Capana10g000258
																																												Capana10g000264
																																												Capana10g000285
																																												Capana10g000287
																																												Capana10g000380
																																												Capana10g000402
																																												Capana10g000405
																																												Capana10g000468
																																												Capana10g000577
																																												Capana10g000585
																																												Capana10g000607
																																												Capana10g000656
																																												Capana10g000661
																																												Capana10g000684
																																												Capana10g000707
																																												Capana10g000726
																																												Capana10g000843
																																												Capana10g000901
																																												Capana10g001039
																																												Capana10g001081
																																												Capana10g001204
																																												Capana10g001225
																																												Capana10g001268
																																												Capana10g001276
																																												Capana10g001325
																																												Capana10g001411
																																												Capana10g001413
																																												Capana10g001438
																																												Capana10g001460
																																												Capana10g001475
																																												Capana10g001481
																																												Capana10g001537
																																												Capana10g001552
																																												Capana10g001554
																																												Capana10g001629
																																												Capana10g001695
																																												Capana10g001785
																																												Capana10g001791
																																												Capana10g001794
																																												Capana10g001805
																																												Capana10g001808
																																												Capana10g001825
																																												Capana10g001829
																																												Capana10g001916
																																												Capana10g001923
																																												Capana10g001960
																																												Capana10g001961
																																												Capana10g001966
																																												Capana10g001969
																																												Capana10g001980
																																												Capana10g002006
																																												Capana10g002046
																																												Capana10g002058
																																												Capana10g002060
																																												Capana10g002076
																																												Capana10g002131
																																												Capana10g002139
																																												Capana10g002152
																																												Capana10g002186
																																												Capana10g002196
																																												Capana10g002207
																																												Capana10g002275
																																												Capana10g002284
																																												Capana10g002285
																																												Capana10g002303
																																												Capana10g002315
																																												Capana10g002327
																																												Capana10g002334
																																												Capana10g002343
																																												Capana10g002355
																																												Capana10g002361
																																												Capana10g002370
																																												Capana10g002374
																																												Capana10g002377
																																												Capana10g002381
																																												Capana10g002455
																																												Capana10g002459
																																												Capana10g002463
																																												Capana10g002473
																																												Capana10g002486
																																												Capana10g002489
																																												Capana10g002500
																																												Capana10g002515
																																												Capana11g000011
																																												Capana11g000037
																																												Capana11g000059
																																												Capana11g000066
																																												Capana11g000080
																																												Capana11g000097
																																												Capana11g000127
																																												Capana11g000172
																																												Capana11g000185
																																												Capana11g000196
																																												Capana11g000197
																																												Capana11g000199
																																												Capana11g000236
																																												Capana11g000259
																																												Capana11g000283
																																												Capana11g000315
																																												Capana11g000369
																																												Capana11g000375
																																												Capana11g000396
																																												Capana11g000401
																																												Capana11g000404
																																												Capana11g000430
																																												Capana11g000465
																																												Capana11g000466
																																												Capana11g000470
																																												Capana11g000505
																																												Capana11g000565
																																												Capana11g000619
																																												Capana11g000645
																																												Capana11g000651
																																												Capana11g000662
																																												Capana11g000685
																																												Capana11g000699
																																												Capana11g000752
																																												Capana11g000801
																																												Capana11g000862
																																												Capana11g000863
																																												Capana11g000880
																																												Capana11g000905
																																												Capana11g000950
																																												Capana11g000968
																																												Capana11g001026
																																												Capana11g001028
																																												Capana11g001138
																																												Capana11g001161
																																												Capana11g001203
																																												Capana11g001217
																																												Capana11g001228
																																												Capana11g001244
																																												Capana11g001278
																																												Capana11g001305
																																												Capana11g001313
																																												Capana11g001329
																																												Capana11g001363
																																												Capana11g001372
																																												Capana11g001379
																																												Capana11g001417
																																												Capana11g001427
																																												Capana11g001434
																																												Capana11g001454
																																												Capana11g001484
																																												Capana11g001497
																																												Capana11g001506
																																												Capana11g001520
																																												Capana11g001524
																																												Capana11g001593
																																												Capana11g001615
																																												Capana11g001659
																																												Capana11g001705
																																												Capana11g001770
																																												Capana11g001836
																																												Capana11g001846
																																												Capana11g001884
																																												Capana11g001911
																																												Capana11g001914
																																												Capana11g001940
																																												Capana11g001941
																																												Capana11g002003
																																												Capana11g002020
																																												Capana11g002029
																																												Capana11g002055
																																												Capana11g002067
																																												Capana11g002132
																																												Capana11g002155
																																												Capana11g002199
																																												Capana11g002206
																																												Capana11g002227
																																												Capana11g002233
																																												Capana11g002289
																																												Capana11g002293
																																												Capana11g002294
																																												Capana11g002296
																																												Capana11g002316
																																												Capana11g002327
																																												Capana11g002336
																																												Capana11g002341
																																												Capana11g002349
																																												Capana11g002358
																																												Capana11g002361
																																												Capana11g002371
																																												Capana11g002394
																																												Capana12g000082
																																												Capana12g000083
																																												Capana12g000122
																																												Capana12g000137
																																												Capana12g000220
																																												Capana12g000221
																																												Capana12g000233
																																												Capana12g000234
																																												Capana12g000235
																																												Capana12g000237
																																												Capana12g000271
																																												Capana12g000290
																																												Capana12g000298
																																												Capana12g000350
																																												Capana12g000456
																																												Capana12g000461
																																												Capana12g000465
																																												Capana12g000513
																																												Capana12g000534
																																												Capana12g000535
																																												Capana12g000538
																																												Capana12g000539
																																												Capana12g000544
																																												Capana12g000577
																																												Capana12g000609
																																												Capana12g000645
																																												Capana12g000653
																																												Capana12g000663
																																												Capana12g000703
																																												Capana12g000728
																																												Capana12g000747
																																												Capana12g000787
																																												Capana12g000805
																																												Capana12g000820	BCAT-D3
																																												Capana12g000840
																																												Capana12g000864
																																												Capana12g000878
																																												Capana12g000949
																																												Capana12g000967
																																												Capana12g000982
																																												Capana12g001007
																																												Capana12g001020
																																												Capana12g001024
																																												Capana12g001026
																																												Capana12g001029
																																												Capana12g001066
																																												Capana12g001072
																																												Capana12g001109
																																												Capana12g001119
																																												Capana12g001186
																																												Capana12g001232
																																												Capana12g001359
																																												Capana12g001470
																																												Capana12g001533
																																												Capana12g001572
																																												Capana12g001588
																																												Capana12g001601
																																												Capana12g001676
																																												Capana12g001743
																																												Capana12g001751
																																												Capana12g001817
																																												Capana12g001851
																																												Capana12g001877
																																												Capana12g001954
																																												Capana12g002010
																																												Capana12g002025
																																												Capana12g002029
																																												Capana12g002033
																																												Capana12g002038
																																												Capana12g002158
																																												Capana12g002164
																																												Capana12g002202
																																												Capana12g002226
																																												Capana12g002238
																																												Capana12g002330
																																												Capana12g002335
																																												Capana12g002401
																																												Capana12g002406
																																												Capana12g002468
																																												Capana12g002509
																																												Capana12g002549
																																												Capana12g002554
																																												Capana12g002556
																																												Capana12g002599
																																												Capana12g002600
																																												Capana12g002615
																																												Capana12g002617
																																												Capana12g002626
																																												Capana12g002627
																																												Capana12g002643
																																												Capana12g002658
																																												Capana12g002662
																																												Capana12g002675
																																												Capana12g002676
																																												Capana12g002687
																																												Capana12g002702
																																												Capana12g002714
																																												Capana12g002746
																																												Capana12g002750
																																												Capana12g002751
																																												Capana12g002755
																																												Capana12g002787
																																												Capana12g002790
																																												Capana12g002791
																																												Capana12g002806
																																												Capana12g002811
																																												Capana12g002827
																																												Capana12g002866
																																												Capana12g002908
																																												Capana12g002910
																																												Capana12g002916
