# Supplementary material for: Integrative Analysis of the Metabolome and Transcriptome of a Cultivated Pepper and Its Wild Progenitor Chiltepin (Capsicum annuum L. var. glabriusculum) Revealed the Loss of Pungency During Capsicum Domestication
Source: Front Plant Sci. 2022 Jan 5;12:783496. doi: 10.3389/fpls.2021.783496 (PMC8767146; doi:10.3389/fpls.2021.783496)
Supplement: Supplementary file 9 [file Table_9.XLSX]

## Sheet: Sheet1
Supplementary Table S9. Genes in the greenyellow module
Gene ID	BB3-11DAP-1	BB3-11DAP-2	BB3-11DAP-3	BB3-22DAP-1	BB3-22DAP-2	BB3-22DAP-3	BB3-33DAP-1	BB3-33DAP-2	BB3-33DAP-3	BB3-55DAP-1	BB3-55DAP-2	BB3-55DAP-3	Chiltepin-11DAP-2	Chiltepin-11DAP-3	Chiltepin-22DAP-1	Chiltepin-22DAP-2	Chiltepin-22DAP-3	Chiltepin-33DAP-2	Chiltepin-33DAP-3	Chiltepin-55DAP-1	Chiltepin-55DAP-2	Chiltepin-55DAP-3
Capana00g000268	0.226945	0.1512	0.096679	0	0.030691	0.065755	0	0.085143	0.031505	0.026848	0	0	0.097416	0.38032	0.410858	0.476045	0.40175	0.301926	0.429213	0.049771	0.047617	0
Capana00g000396	37.7602	38.923	43.205	47.9072	51.476	49.2256	33.6652	42.2817	36.0855	23.9137	30.3272	41.5818	98.9774	86.8293	70.4763	109.023	87.9002	59.6815	50.7848	27.0055	27.6081	35.331
Capana00g000507	0.259216	0.103304	0.316955	0.063439	0.058138	0.085992	3.21072	1.92031	0.043971	0	0	0.259607	0.499081	0.981403	2.35267	2.14746	0.841025	0.771119	1.71749	0.138929	0.565117	0.771249
Capana00g000626	3.19544	2.9024	3.28159	3.59207	3.08752	3.72804	2.31047	2.80926	3.38255	1.83474	1.62811	2.15941	6.78975	5.09896	5.03087	5.97939	8.41248	5.01635	2.88428	1.63771	2.5286	2.41913
Capana00g000688	4.26109	5.79234	7.34246	2.57591	1.39391	7.98859	0.388245	0.701151	0.746734	1.63687	15.3567	3.00351	5.19103	11.2135	53.2951	77.3807	249.726	2.73453	5.82287	7.61768	72.6628	37.835
Capana00g000736	2.62034	3.0205	2.31451	4.16324	3.89984	3.92691	2.24417	2.50094	1.16523	1.97504	3.63638	8.5853	8.08022	9.80118	6.97626	8.90899	10.8208	2.85986	2.80836	1.99488	3.49326	2.6543
Capana00g000942	4.08401	3.37499	2.35508	1.83144	2.22564	2.07729	4.36167	4.22998	6.05624	1.87017	2.63389	3.09633	5.62963	5.77916	11.2836	9.8196	9.87956	6.36028	7.0197	4.03842	6.14682	5.4439
Capana00g001178	22.3082	19.4723	20.2707	25.4616	27.1653	26.1155	28.7032	38.0147	46.9691	21.6643	24.1303	18.9677	28.3549	37.53	42.8786	42.144	44.6749	35.7692	33.4417	19.0567	21.4401	20.362
Capana00g001257	1.08623	2.09103	2.00496	0.470643	0.621312	0.366102	0.460447	0.19031	0.373063	0	0	0	4.2902	5.2189	4.14347	5.66154	3.92924	1.16434	1.5276	0.250691	0.188448	0.351469
Capana00g001331	2.80728	0.688655	1.45203	0.739232	1.06889	0.542265	2.68896	2.48741	0.200135	1.69924	0.768405	2.40621	3.87437	3.7184	4.88108	3.35017	7.27965	1.98692	3.27552	0.970838	0.513501	0.461905
Capana00g001550	0	0	0	0	0	0	0	0	0	0	0	0	0.070696	0	0.475647	0.693724	1.27008	0	0.155033	0.103818	0.480511	0.29152
Capana00g001695	59.288	49.4812	51.3656	55.1823	67.3915	53.6268	52.9755	62.3942	67.4247	70.3446	67.8679	75.3973	90.2859	91.2457	89.7144	100.283	92.8813	56.1359	60.9008	68.1183	65.2085	66.2889
Capana00g002391	0.194969	0	0	0	0.045211	0	0.320726	0	0	0	0	0	0.450482	0.363729	6.81824	0.640483	0.185993	0	0.148394	0	0.068981	0.038336
Capana00g002483	13.8316	12.0368	14.414	20.0698	21.0948	22.0161	27.0078	34.2195	40.9478	19.5644	17.8152	20.0015	30.4308	33.2412	39.0783	38.2313	44.2923	36.048	32.0246	21.5884	22.8346	20.2819
Capana00g002619	0.758525	0.949378	1.48922	2.17671	3.24441	1.95963	3.0927	3.43561	2.47614	1.31226	3.05325	1.34594	1.45293	5.04084	3.5949	6.80427	4.8607	0.717425	1.49327	1.19178	1.90423	2.9773
Capana00g002623	0.041545	0	0	0	0	0	0.113821	0.139089	0.101475	0	0.055279	0.048334	0.030748	0.419686	3.0199	2.12675	3.86162	0.076211	0.474946	0.298461	1.53899	1.21051
Capana00g002626	0.508848	0.682125	0.285293	1.07643	1.53917	1.08935	1.44902	1.82813	1.50165	1.07088	6.52263	2.71736	2.28397	2.32118	5.79721	7.96476	10.7011	1.75165	2.16995	1.53776	2.88774	2.04494
Capana00g002629	0.226545	0.175273	0.169723	0	0.024315	0.083164	0.073938	0.023214	0.147273	0.026235	0.041854	0.048144	0.121377	1.68135	1.78412	1.76003	3.01926	0.399123	0.863149	0.235273	1.1162	0.664282
Capana00g002633	0.057825	0.134949	0.254359	0.081018	0.109166	0.166913	0.680414	0.389836	0.168122	0	0.061859	0.063411	0.361096	2.09781	1.78628	2.53621	2.65341	0.051079	0.073343	0.040934	0.193481	0.085677
Capana00g002634	0.059076	0	0	0	0.057914	0.147783	0.087454	0.020198	0.119307	0.652022	0.694444	0.190257	0.749067	1.2181	1.10401	1.23906	1.41884	0.426678	0.622816	0.267907	0.61597	0.509096
Capana00g002726	0.285303	0.481884	0.361301	0.262374	0.591444	0.331352	1.63527	1.54358	0.836424	4.08018	1.0942	0.708922	3.96034	4.33209	4.86768	3.9735	4.82663	2.95774	2.86871	0.539372	0.817468	0.587552
Capana00g002764	0.60337	0.355631	0.429155	0.850141	0.774074	0.895183	1.04518	0.92154	2.29038	0.520107	1.11433	0.823836	0.550926	1.74263	2.88956	2.54139	3.50681	1.31427	1.80461	0.300986	0.957457	1.26135
Capana00g002945	0.770628	0.053086	0.108923	0	0	0	0.240181	0	0	0	0	0	0.683488	0.287032	6.33277	0.593172	0	0.248417	2.39814	0	0	0.215734
Capana00g002967	1.39599	0.347056	0.431753	2.40157	1.53007	2.1832	0.91989	0.479819	0.523477	0.484373	0.331796	1.0832	3.11891	4.24704	11.9639	12.919	7.84851	3.15253	2.64904	3.10054	3.55868	3.19667
Capana00g003094	55.8366	60.2202	58.9236	90.878	82.9433	98.4187	30.7507	38.5459	39.5014	66.3133	58.1833	59.9041	40.8425	50.1306	113.866	111.574	107.43	99.6555	89.0156	34.5975	32.3387	25.3276
Capana00g003208	3.38522	2.51301	2.70713	2.58167	2.54047	2.77018	3.86456	3.45869	3.49204	1.15807	0.965597	0.737035	4.72985	6.36159	9.95716	9.00947	12.0241	6.1762	6.26746	3.20528	4.52354	4.65058
Capana00g003380	6.94434	6.13259	7.86065	6.519	7.74675	7.64506	6.77188	9.51875	10.8474	6.59974	5.33837	6.01427	13.6108	11.1902	16.8534	16.5034	15.5149	10.2535	7.60586	8.32753	9.07355	8.22315
Capana00g003384	0.084587	0	0.097524	0.123419	0.193875	0.015866	0.345625	0.741233	0.596045	0	0	0	2.42595	6.92274	9.53192	19.1336	25.5149	0.939333	2.16626	1.67035	8.76155	3.39988
Capana00g003385	0.055952	0.076468	0	0.065398	0.031577	0.032342	0.532578	0.096925	0.763342	0	0	0	0.604584	3.49128	5.54604	9.14188	9.38099	0.825732	2.35235	2.16409	3.9674	3.30826
Capana00g003596	5.68286	3.87429	3.4043	4.35607	4.17178	4.01165	6.31786	5.40899	7.63996	12.0197	9.49171	11.7506	24.3255	97.5837	82.5089	181.661	79.53	14.2463	18.3172	25.0756	27.0789	24.3978
Capana00g003775	7.02203	6.79393	7.35253	3.28955	3.56961	3.27541	2.7888	4.70793	4.37745	2.85493	3.04334	5.15635	9.70535	9.83998	10.5238	10.5425	10.501	6.01569	4.24644	3.59891	4.28886	3.18833
Capana00g003778	0.553263	0.060136	0.217508	0.311709	0.635463	0.86675	1.80087	0.98615	1.10024	0.149092	0.265859	0.292831	1.91016	2.11505	3.99893	2.30482	0.789188	0.777938	1.95199	0.38386	0.236086	0.352507
Capana00g003837	16.1564	19.2897	14.2924	19.2972	18.9281	18.8915	13.87	13.9942	14.3671	19.4636	25.4374	29.0636	26.1887	28.0884	31.6575	34.1561	33.2776	24.5551	25.7148	20.6392	19.3323	19.5373
Capana00g003844	0.302122	0	0.16811	0.346933	0.154617	0.699131	0.39219	0.09408	0.130486	0.341859	0	0	0.533398	0.738198	1.0757	0.903442	1.60801	1.0581	0.904047	0.313733	0.128323	0.5597
Capana00g003978	2.23847	2.36536	1.50483	1.05869	1.93344	1.72029	2.39398	1.02689	0.230152	0.160026	0.138681	0	5.02609	3.68623	7.94543	4.60501	3.10428	1.25891	3.972	0.845711	0.904812	0.58905
Capana00g004143	17.6975	17.6287	14.5527	10.6516	12.91	9.58339	10.1805	13.497	15.1878	5.67078	6.80245	5.91011	20.861	24.5439	33.1489	38.7364	45.3632	14.4928	11.8102	7.33119	8.74089	9.54368
Capana00g004214	1.33443	0.480998	0.807835	0.765238	0.491086	0.30653	6.1848	2.53659	0	0	0	0	6.35358	7.44565	26.3114	12.7244	3.30595	0.77137	7.67124	0	0	0
Capana00g004217	11.2354	7.51324	8.39994	3.64	3.48372	3.53867	8.44617	2.27724	1.83408	1.31865	1.31991	1.44373	8.13897	8.13612	22.4202	12.1289	6.29372	4.76748	8.70729	3.10321	3.28516	3.16508
Capana00g004461	0.327714	0.024831	0.104371	0.071016	0.157683	0.039643	5.24898	1.76016	0.040542	0	0	0	4.0039	4.95154	17.2865	8.04012	2.47441	2.29814	6.53889	0.032024	0	0.177777
Capana00g004664	2.74784	3.26595	3.74627	5.76874	4.63	6.45234	2.39291	3.67415	4.10975	7.03966	6.43953	6.37042	9.16354	9.02283	10.1321	12.0223	16.5612	5.99308	5.09663	3.62062	4.67241	4.15701
Capana00g004781	41.3607	49.2776	35.7993	78.3683	101.986	79.3037	61.551	91.8278	61.8272	77.6145	361.222	110.981	95.4272	97.6802	199.588	320.802	489.633	55.6786	69.6792	88.4074	102.527	112.796
Capana00g004909	5.77807	6.64976	6.9276	6.66688	5.90033	7.06737	5.39297	4.85299	4.67729	1.89001	1.49284	1.67502	9.35038	9.38012	13.5171	11.563	9.37636	7.46023	8.05695	6.48438	6.03805	5.37084
Capana01g000033	0	0	0	0	0	0	0	0	0	0	0	0	0.068607	0.127889	0.171762	0.196254	0.052946	0	0	0	0	0
Capana01g000053	6.78109	6.98813	5.54708	12.6427	11.7396	20.0616	11.8736	13.3339	12.6389	0.12884	0.911451	0.504183	24.9539	34.2175	34.8085	39.3658	36.6303	6.2541	5.80944	2.05548	5.05538	6.56935
Capana01g000074	0.525706	0.602098	0.608634	5.96112	6.79245	8.55305	4.93193	9.13812	13.2208	5.50495	5.45149	6.78437	9.43163	11.6875	10.9472	14.2099	13.5464	10.4515	7.40428	5.64961	6.34436	5.36968
Capana01g000111	0.14677	0.020568	0.09238	0.03683	0.016326	0.017478	0.849762	0.0186	0.086414	0.078952	0.061292	0.037329	2.70807	13.0852	32.6106	47.5482	27.9919	0.950839	1.50408	0.066608	0.073496	0.110913
Capana01g000299	1.91161	0.578298	0.92427	0	0.30817	0	0	0	0	0	0	0	0.230495	2.90268	3.81005	2.32159	0.052394	0	0.941312	0	0	0
Capana01g000402	15.6583	14.1344	15.7341	45.612	58.861	53.507	39.9726	61.662	62.7459	34.0475	27.4346	28.3306	88.0291	79.9502	101.564	99.7528	100.665	49.4376	44.4604	19.4141	26.95	26.1145
Capana01g000441	3.37633	3.23093	8.87133	7.27865	4.64567	5.52713	1.02846	1.26048	0.65683	1.10661	13.9521	5.37979	1.82669	3.06325	12.2176	14.2503	51.8702	2.60754	2.86016	0.79291	1.38338	0.554531
Capana01g000477	4.18523	0.467971	4.26756	4.22567	5.00136	3.94477	5.31763	0.159612	0.181996	3.03556	4.29341	0.516276	3.10075	0.32379	4.69198	5.36064	5.01339	2.6031	2.54653	3.38424	3.45998	3.64464
Capana01g000581	3.21535	2.64323	3.40421	3.29126	4.54139	3.68779	2.58626	2.57219	3.0396	5.47361	3.09961	3.29523	5.87007	4.51735	7.74129	9.7694	10.5797	4.31812	3.75642	4.28406	4.2336	2.55854
Capana01g000757	13.7889	7.89498	8.26745	9.37523	11.2035	10.3266	37.5534	21.0549	19.7635	0.605873	0.220155	0.622666	13.9226	20.1336	34.8331	27.3528	28.0092	21.6531	28.2238	1.6517	3.17245	3.71673
Capana01g000775	25.6461	27.8703	22.0089	12.1243	13.1196	12.8331	23.6456	20.8159	17.2156	12.936	8.38675	8.84234	25.0438	33.4783	62.0129	76.6823	55.2069	22.099	26.1302	11.8859	17.3084	19.0791
Capana01g000786	28.9146	23.7868	26.5799	39.1127	39.2432	42.9044	80.511	58.2989	28.0657	3.88508	4.21351	8.42059	42.787	55.7687	106.953	92.6095	80.4353	62.1932	98.8672	9.07918	18.2034	21.1795
Capana01g000793	2.25159	2.25341	6.50317	2.54949	3.52046	1.91092	3.1726	8.91598	11.2618	3.07674	1.47114	3.43473	1.85725	1.1978	28.064	22.8894	26.3103	3.83317	3.70175	0.810616	3.17757	1.29088
Capana01g000815	2.60494	4.76036	3.0202	8.98994	20.2881	19.6484	9.8976	24.7461	6.43141	1.30375	20.0307	59.9699	17.0997	14.1811	31.7506	39.3626	31.5587	6.95848	7.64238	1.8539	4.60577	2.10837
Capana01g000887	3.70407	2.81339	3.30457	1.19041	1.94347	1.97253	5.58634	2.37095	2.09559	1.47013	1.11572	0.54706	4.3456	19.0294	12.5225	19.6297	11.2345	6.12415	7.33278	1.97088	2.25849	2.11709
Capana01g001021	3.74	3.96438	4.5527	4.56405	4.13497	5.42779	2.81827	4.39119	5.23448	4.86937	3.27552	3.25018	6.88419	7.66481	7.48393	7.97478	7.84215	5.32871	3.64458	3.08221	3.51056	2.93344
Capana01g001028	20.2319	16.9136	20.2445	15.8436	13.6298	16.2482	16.1311	22.6951	26.2039	25.1902	22.0208	18.0889	24.581	28.0076	27.2919	30.389	31.7808	23.2739	22.0453	19.4076	19.7193	21.5929
Capana01g001311	0.118351	0	0.104415	0	0	0.068528	0	0	0	0	0	0	0.160656	0.897777	1.10986	2.92609	0.6495	0	0.038052	0	0	0.180864
Capana01g001377	0.76208	0.476623	0.467969	0.053796	0.183773	0	1.2823	0.615215	0	0.023425	0	0	1.37427	1.93138	7.00686	2.23689	0.155953	0.665626	3.57145	0	0.040577	0
Capana01g001554	0.038979	0	0.140361	0	0	0	0	0	0.114446	0	0	0	2.41525	3.98737	9.84403	20.2706	5.21294	4.73209	3.34595	0.249989	3.62814	3.02584
Capana01g001581	1.85923	1.65768	1.57308	1.90873	2.06486	2.41269	1.58997	2.88607	3.0281	1.3626	1.9104	0.884611	2.31701	4.61613	6.65166	5.99054	8.02344	3.87711	3.05136	0.719016	1.14256	1.27917
Capana01g001764	0.452126	0.278716	0.437857	0	0	0	1.00216	0.559844	4.44077	0	0	0	0.243249	4.70312	8.99433	12.3832	5.51783	0.499684	6.47274	2.35476	5.32693	4.56241
Capana01g002043	27.8811	28.9099	26.835	31.5445	30.3584	29.4625	29.0789	31.7478	40.966	35.5963	32.5284	36.6421	48.2458	47.9796	51.497	48.0204	50.6827	30.526	31.6599	38.3876	37.7584	39.9808
Capana01g002050	200.486	243.582	220.769	888.662	791.606	837.84	563.796	967.575	1022.88	476.373	346.311	417.118	967.006	667.218	1159.95	1043.55	1045.77	540.25	556.983	764.106	777.196	714.999
Capana01g002617	0.690712	0.911951	0.70709	0.599962	0.899483	0.930324	0	1.67721	1.94938	1.54211	1.05024	1.04575	1.18955	1.89961	1.64731	1.60725	1.99326	1.80014	0.81411	1.38504	1.01167	1.32895
Capana01g002656	0.775026	0.848569	1.00302	0.282464	0.339685	0.307286	0	0	0	0.228148	0	0	0.8162	0.900723	2.03247	1.59326	2.17497	0.105473	0.286946	0.164266	0.191002	0
Capana01g002735	0.85271	0.792357	0.906845	0.873722	0.976643	1.59102	1.38972	1.31631	1.03579	2.23314	1.22146	0.803141	3.19151	3.23221	4.83549	6.34044	6.97522	4.4115	3.45548	3.04965	1.24077	2.30502
Capana01g002782	0.104538	0.144531	0.091136	0.155101	0.23942	0.427582	0.153004	0.241844	0.154583	0.257872	0.484803	0.195946	0.269167	0.42569	1.23207	1.88636	2.40211	0.212038	0.289333	0.10397	0.468174	0.492428
Capana01g002794	7.53828	4.3089	4.80788	5.51648	6.13872	6.79797	4.08483	4.38139	7.7361	1.5817	0.542154	0.927193	8.21937	11.2224	10.3686	10.9429	12.0955	13.3388	12.8742	1.59107	0.992862	1.91185
Capana01g002816	1.863	1.5001	1.28842	1.98903	2.7628	2.91901	3.76089	3.61746	5.80906	1.57215	0.635092	1.49464	7.15475	6.3601	5.74462	6.77383	7.04862	3.75822	3.29572	0.37821	1.64336	1.20904
Capana01g003017	4.65857	3.57656	3.73384	3.09677	2.49191	2.52184	4.30309	3.83512	4.08166	2.26774	2.1605	2.2085	3.49722	5.21594	13.6825	7.66164	8.11321	4.25443	6.52963	4.16702	4.04774	3.9627
Capana01g003373	0.762685	0.101095	0.745325	0.438093	0	0	0	0	0.052268	0	0.417954	0	0.694748	1.51127	0.89693	2.2727	0.719633	0	0.43535	0	0	0
Capana01g003374	0.394825	0.231751	0.238425	0.44705	0.495563	0.351451	0.603304	0.54422	0.413277	0.061938	0	0.024824	0.796479	2.85199	5.78636	9.65777	4.4314	0.215373	0.458375	0.120288	0.112039	0.185626
Capana01g003456	0	0	0	0	0	0	0.273702	0	0	0	0	0	1.92353	12.2914	10.1748	17.2476	9.17671	1.43273	2.77301	0	0	0
Capana01g003488	0.735314	0.706084	0.530071	3.0377	1.66205	2.63054	1.16989	1.234	2.38828	0.606744	1.7795	0.376419	6.81511	7.12129	5.92146	10.1047	16.0257	3.78971	2.02137	1.2692	1.73536	2.8643
Capana01g003534	28.8906	24.0611	13.1976	16.3626	18.5502	17.7191	27.4029	19.2707	19.8717	38.2849	29.1911	37.0893	37.4429	85.7185	87.3796	103.04	63.7601	22.9418	48.0939	37.2112	64.6805	45.6573
Capana01g003550	1.08988	1.04386	0.569172	0.077278	0.427437	0.347092	1.16785	0.382492	0.080066	0.074187	0	1.63323	1.08805	0.281	3.36657	2.77718	3.82222	0.108614	0.357822	0.116257	0.482845	0.108195
Capana01g003600	9.31887	8.26269	8.17853	10.8593	10.8403	10.9578	15.1293	12.412	16.6366	8.4566	10.8813	11.3549	17.433	19.2673	22.125	21.9703	23.6062	19.7825	16.897	8.18536	12.3455	10.2913
Capana01g003751	15.401	22.8021	21.3128	17.1207	19.0088	14.7902	16.5445	27.1989	34.185	9.61388	12.7281	14.8027	20.5321	20.2215	59.4838	57.0922	70.5353	11.4649	11.021	23.0677	21.5192	20.3526
Capana01g003855	0.053726	0	0.043559	0	0.082968	0.182409	0.082835	0.021079	0.0846	0.089358	0.140911	0.103849	0.043647	0.081337	0.343723	0.50776	0.714834	0.224995	0.323959	0.099459	0.094901	0.197395
Capana01g003904	13.2386	5.16439	16.0138	25.0706	8.08915	11.7402	16.5229	26.2719	24.7288	21.708	8.00168	15.3279	5.67147	19.4517	35.9045	37.4616	35.7349	24.7891	22.3976	23.5626	26.0428	23.3113
Capana01g004020	1.28316	1.84794	1.40079	0.948951	0.495323	1.05227	0.411865	0.313152	1.12251	0.456668	0.630499	0.610685	0.970886	3.09098	5.13912	11.0589	4.0179	0.364089	1.2297	0	0	0
Capana01g004401	46.938	61.5504	50.1555	54.9752	54.7728	53.5919	61.2301	50.0593	63.7068	87.2495	67.777	78.7339	86.2239	85.0512	99.699	115.069	103.428	53.7073	53.9474	73.7395	87.1565	76.3342
Capana01g004480	9.92604	14.1732	13.2225	9.28731	16.1412	15.1434	7.1691	8.03592	2.66061	7.20465	41.3036	30.0121	11.7726	12.429	44.6766	70.2814	104.098	8.98735	19.3562	7.8045	14.3675	6.2919
Capana02g000265	0.168164	0.037242	0	0	0.073438	0.018476	1.9368	0.58821	0	0	0	0	0.203795	0.641747	2.55963	1.4852	0.036046	0.261639	1.44162	0.091565	0.046768	0.041814
Capana02g000273	12.1757	16.8601	10.4217	14.9285	15.8284	18.6809	17.8283	30.2125	30.9864	8.2263	9.71052	8.77638	15.3419	20.8843	45.4672	52.8857	55.5541	25.331	24.2861	12.1503	20.8909	15.6124
Capana02g000493	0.094861	0	0	0	0	0	0	0	0	0	0	0	0.076381	0.43145	0.393546	1.1862	0.497491	0.039558	0.042301	0	0	0
Capana02g000611	37.0543	29.5963	25.8632	37.2111	40.5003	43.8331	75.3264	120.094	205.922	77.4984	70.387	91.1622	101.995	100.033	215.023	263.196	194.427	143.775	121.724	59.2262	78.6289	84.753
Capana02g000675	12.1696	11.7243	13.0336	11.6009	12.6208	12.4223	11.3102	18.9341	18.6102	2.37514	1.92334	3.42234	12.5778	12.2824	31.8263	24.781	28.1037	8.40893	7.34919	13.3116	17.1538	13.9328
Capana02g000893	2.9674	3.31029	2.71782	2.99424	2.80019	4.66648	3.76068	6.47769	9.43623	2.16353	1.45187	1.06161	12.8087	11.1737	9.73119	10.6394	11.456	6.19793	3.62066	6.33763	4.18516	4.6193
Capana02g001064	1.57232	3.01485	1.80488	2.58052	4.3958	2.74243	2.50586	4.49163	4.45867	2.75631	4.64047	6.41348	1.27106	1.0681	7.17165	8.31945	9.85637	2.4205	2.70319	0.725408	0.846134	0.794158
Capana02g001100	3.89906	2.89538	2.94296	1.73037	1.83414	2.14153	3.73469	4.35727	3.22666	1.2412	3.53639	3.25183	1.57136	1.83228	4.82771	4.65683	5.01108	1.22424	2.07876	3.10656	3.71176	3.22606
Capana02g001614	0.005417	0	0	0.063199	0.063558	0.023765	0.107231	0.14665	0.181919	0	0.021559	0.071585	0	0.05128	1.63449	0.700962	2.907	0.062812	0.323917	0.364965	0.524522	0.48508
Capana02g001642	0.246498	0.059103	0	0	0.094636	0	0.375292	0.191866	0.095694	0.344737	1.52842	1.90045	3.14235	2.72582	9.05815	6.42476	5.97576	1.45684	1.43838	1.17587	3.13977	2.41848
Capana02g001666	12.0019	13.6651	11.2102	12.8893	14.5741	13.4429	15.5542	16.4397	19.8033	11.9074	16.7838	14.2324	15.8027	11.9803	34.6979	31.9708	38.426	14.9282	19.2543	18.6488	23.8621	21.6263
Capana02g001669	0	0	0	0.191023	0.091695	0	0	0	0	0	0.183545	0	2.03991	1.52566	1.67686	1.73531	3.41151	0.06637	0	0.595874	0.479367	0.127531
Capana02g001709	2.0903	2.18638	2.22472	0.834004	0.919741	0.24795	1.7254	0.928666	0.305256	0.054631	0.04745	0.315613	1.79206	2.5489	6.84536	4.95406	1.61249	0.553182	2.10411	0	0.084494	0
Capana02g001736	5.92622	2.77692	2.80497	6.1961	8.42454	5.03128	19.7598	16.2657	1.96727	0.804956	0.915856	1.4849	45.1781	49.2109	177.951	82.6954	26.0561	7.90863	92.83	1.60062	1.37229	1.80344
Capana02g001858	72.5377	66.5614	72.9527	86.5856	84.6925	84.1498	88.2115	99.4529	108.252	83.8876	79.0828	79.2642	143.064	146.48	182.822	191.405	184.505	109.656	124.047	128.753	114.644	121.478
Capana02g001951	48.0189	98.3893	118.922	86.752	80.5921	90.6207	113.298	131.838	60.2408	4.6112	1.46774	3.66033	389.06	57.2876	313.7	226.101	203.749	37.119	93.9508	6.27559	16.578	10.8608
Capana02g001962	25.377	22.2208	18.9003	23.4084	21.4441	20.2174	26.7529	29.3217	51.9336	35.5291	10.1482	19.6884	25.6065	23.2778	61.5772	52.5903	45.564	26.529	32.9115	28.1052	23.8329	30.6186
Capana02g001963	6.73974	3.47038	3.78383	2.67982	3.57999	2.60872	4.03269	3.36617	5.00365	4.04224	1.57881	1.25453	4.37535	3.96562	7.6822	7.39881	5.08544	3.18113	3.93061	4.11522	3.56609	4.57656
Capana02g002039	2.0492	1.03545	1.02704	2.33324	2.03305	1.98487	2.53289	2.32066	2.62093	2.3085	2.0764	2.01139	5.09254	4.00641	8.08386	7.561	7.68802	6.02053	6.70596	2.98746	2.92754	3.0157
Capana02g002054	40.4633	45.0756	45.8893	29.8471	41.2905	35.8959	44.9619	49.3349	48.0189	21.4922	11.9696	17.4363	56.0196	53.6397	77.3511	71.4461	72.5733	40.8338	36.3401	22.5456	27.2586	23.3672
Capana02g002146	13.2429	14.1499	14.8652	7.23055	8.08921	6.84959	2.54736	3.42736	3.18827	3.02173	8.70904	11.4116	4.85819	6.71183	21.4274	25.7202	45.9518	3.34338	4.47411	3.31008	6.19104	5.70671
Capana02g002250	0.703641	0.312114	0.225503	0.038208	0.08279	0.079246	0.027879	0.054364	0.05581	0	0	0	0.207265	0.32447	0.842772	0.657436	0.636375	0.1194	0.126292	0.08584	0.112028	0.07453
Capana02g002328	0	0.043	0	0	0	0	0.244377	0.06997	0.289484	0	0	0	0.579056	0.511673	0.352917	0.984027	0.89909	0.299267	0.159945	0	0	0
Capana02g002339	0	0	0	0	0	0	0.27961	0	0	0	0	0	1.93081	8.74461	11.2437	21.8537	10.4869	1.24252	1.91042	0	0	0.058718
Capana02g002376	0.289053	0.319929	0.21516	0.104322	0.306455	0.306296	0.73212	0.300444	0.034823	0.050734	0	0	1.29244	2.03439	1.60499	2.07136	1.56942	0.932375	0.661652	0	0.157461	0.58606
Capana02g002449	0.2087	0.07481	0	0	0.300267	0.059918	1.25843	0.12214	0.060254	0	0	0	0.063227	0.461864	0.434642	0.678254	0.590766	0.163181	0.712654	0	0.174836	0.165606
Capana02g002536	0.055539	0	0.044779	0	0	0	0.107921	0	0	0.126281	0.073406	0.188702	0.753385	3.5506	4.20732	10.8373	4.57864	1.20902	2.56156	0	0.197171	0
Capana02g002632	1.10052	0.96708	1.01836	1.46888	2.54913	2.07633	4.47951	5.49364	3.12672	1.88161	2.37266	3.44302	11.9467	11.7266	38.6501	27.2604	19.4494	8.79858	14.846	6.98277	6.6172	11.0161
Capana02g002659	8.06321	9.1382	8.12589	11.4734	12.855	13.3486	10.5701	13.1557	14.5829	11.9987	10.9047	11.1989	17.1005	13.7142	16.5838	17.7149	18.1462	13.3597	14.7567	12.4043	13.108	12.5411
Capana02g002672	0.834231	6.05128	1.05831	0	0	0	2.14677	0.782003	0.061212	0	0.103332	1.07107	2.31783	6.05924	17.8447	28.4202	28.7558	4.78967	3.89438	0.623636	0.71879	0.701384
Capana02g002704	5.74906	4.7715	5.27624	7.01085	6.32656	7.16106	6.86079	9.61651	10.2099	4.44595	5.04979	4.6668	8.04332	6.78111	10.963	11.5006	11.0315	8.23979	6.93066	3.87858	4.4675	4.91413
Capana02g002706	59.7939	60.8018	69.7455	106.102	110.701	117.75	86.6242	147.701	138.405	135.864	110.846	100.883	119.583	99.7629	166.514	179.44	156.465	79.0631	84.3552	80.2636	74.1552	81.0862
Capana02g002751	10.1191	10.2941	9.03554	7.93011	13.8961	17.1817	11.5476	18.5663	15.1201	1.29635	0.187466	0.130386	17.7019	16.5535	31.6469	33.1063	35.4364	6.11035	5.53376	1.04001	1.98121	2.54941
Capana02g002791	14.596	13.7057	12.2466	37.2565	51.7505	43.5683	86.4553	120.6	120.87	39.3118	26.2178	27.6622	67.1433	52.048	145.219	136.681	131.377	111.206	93.7315	30.926	26.0136	28.4319
Capana02g002812	0.094338	0	0	0	0	0.20292	0.205466	0	0	0.269159	0.444574	0.064214	0.005179	0.52155	1.38247	1.04345	1.38086	0	0.620717	0.034189	0	0.249885
Capana02g002814	1.63608	5.95831	6.7631	3.31461	2.48953	2.1161	0.749197	1.60099	0.040592	0.301047	0.206951	1.45907	8.19147	5.37967	5.81951	4.31213	16.2708	0.451463	3.39375	0.159242	10.1305	1.46907
Capana02g002836	0.096863	0.041242	0.14318	0.071968	0.087938	0	0.303463	0.035794	0	0	0	0	0.302461	0.555936	1.95377	1.35329	2.17021	1.22211	0.903362	0	0.054283	0.047562
Capana02g002986	3.90192	3.83668	4.53287	9.92221	10.6977	12.6567	5.28447	9.29703	9.30072	0.205867	0.346377	0.093851	17.2542	14.9753	37.629	33.992	36.3132	13.344	12.201	0.726788	1.52409	2.3731
Capana02g003027	2.29423	3.0656	2.70434	11.6203	11.582	9.97545	6.77478	25.3581	25.4855	1.78677	2.02366	2.31079	31.0713	32.2695	32.8276	35.2737	44.6342	20.3297	11.0593	5.12595	5.40846	5.25867
Capana02g003087	0.301057	0.235828	0.630466	4.01143	1.79578	1.91583	0.573647	0.282929	0.120425	0.655697	0.567588	1.52226	3.53034	1.00506	7.33001	10.3814	42.4333	0.943801	0.787034	0.85713	8.17099	10.6297
Capana02g003150	1.31248	0.638155	0.604786	0.738092	1.69874	4.39983	1.43825	2.03578	0.222507	0	0	0	2.29466	4.64225	5.09573	5.57804	4.35052	1.21524	2.82905	0.027957	0.225078	0.150591
Capana02g003263	0	0	0	0.023452	0	0.125884	0.069803	0.023328	0.023407	0.018206	0.180557	0.210003	0.237658	0.123134	0.441092	0.933735	1.02724	0.338519	0.255608	0.126938	0.340569	0.156674
Capana02g003341	2.64897	3.61365	4.15408	0.315413	0.554384	0.782888	2.62342	1.69291	0.50827	0	0	0	1.42435	4.05521	15.5896	8.21217	1.09466	1.45235	4.47906	0	0	0
Capana02g003364	11.3692	10.9508	12.1534	12.5529	13.1472	13.2639	13.0535	16.1387	15.7053	15.3294	14.5849	12.9208	19.5305	20.1374	24.7526	26.2003	25.9962	22.408	19.3864	15.6338	16.9931	18.4015
Capana02g003430	1.27725	0.263016	0.611182	10.0822	11.6513	11.7393	20.0976	33.0806	31.1575	0.147902	0.085688	0.393221	28.3415	34.5706	29.2911	33.9683	38.2238	48.0919	30.2759	0.909226	1.60598	1.47067
Capana02g003474	31.5148	31.097	25.3951	23.2561	23.3226	24.6896	43.1473	27.3087	22.7716	0.247862	0.213423	0.246848	26.2791	38.8463	56.9842	54.591	48.2467	34.2752	35.1437	2.0198	4.84317	4.38933
Capana02g003503	2.87857	3.60369	2.50213	3.19257	2.78774	4.53817	4.7428	5.41239	7.18743	0.099532	0.387192	0.375318	4.30086	6.38421	6.83223	7.2663	9.51799	6.26512	4.7681	1.65797	2.31242	1.23527
Capana02g003558	9.70811	9.10352	9.51957	12.5597	12.5659	12.2161	8.07034	9.25754	8.32077	1.51317	3.02149	1.8886	10.1063	9.70701	20.6586	20.5027	23.3176	13.8476	14.951	4.48027	5.15297	3.87788
Capana02g003626	1.67356	1.22667	1.28721	0.199499	0.538496	0.090919	0.273447	0.256127	0.036765	0	0	0	3.03977	1.80252	3.48488	2.18452	3.9516	1.00274	0.917019	0.116164	0.606548	0.152509
Capana02g003627	0.064228	0	0.058328	0	0	0	0	0	0	0	0	0	3.84752	2.41272	3.81899	4.62675	7.10191	1.43299	1.20704	0	0.279822	0.625598
Capana02g003634	5.09014	4.19853	6.02894	1.04739	1.91265	1.35548	2.46552	2.24863	1.41826	1.74401	1.52452	2.31311	7.90342	7.58876	11.2478	8.00408	3.4846	1.48412	3.16532	1.47281	1.05202	1.46025
Capana02g003670	0.861666	0.384276	0.651309	0.676717	0.70848	1.34899	0.284163	0.32681	0.340413	0.076162	0	0.270971	1.99178	2.11071	2.45703	2.11285	1.67937	0.970731	1.46704	0	0	0.065489
Capana03g000038	2.82853	2.52004	2.31734	1.27726	1.18213	1.49225	2.43953	1.52262	1.41561	1.24148	2.13636	1.68739	1.40549	1.13638	1.95217	2.51554	3.97546	2.18903	2.8251	2.0137	2.40048	2.46098
Capana03g000102	4.23707	5.77852	3.85341	1.41979	2.19943	2.49916	19.8863	3.63045	2.37914	8.86716	15.6836	12.5576	2.55129	11.4743	16.4472	14.0909	27.5033	2.35234	7.78872	1.64828	5.38563	4.4201
Capana03g000117	41.5209	44.1866	87.87	63.6735	50.6899	41.9816	16.1785	28.8281	22.551	48.9128	91.1092	103.417	29.6155	30.0764	81.6483	101.381	186.4	39.6078	24.53	32.7018	55.1205	34.7764
Capana03g000126	0.198979	0.167427	0.062941	0.139502	0.21985	0.058972	0.069759	0	0.077209	0	0.031256	0	0.4296	0.512095	1.26732	1.1721	1.26986	0.097249	0.090991	0	0	0.049957
Capana03g000253	5.06527	4.14199	5.32694	8.14889	9.03509	13.4937	14.9373	15.8018	20.5843	7.51997	14.7973	7.36306	29.5916	26.3446	28.4965	26.4801	31.7915	12.1831	12.3448	12.1411	13.6828	12.9991
Capana03g000316	11.9253	12.0178	11.0505	10.6715	10.444	11.8771	12.9165	14.9555	14.5831	5.65807	5.37676	5.76056	15.0326	12.1077	19.2917	16.829	16.2236	11.6002	14.2243	12.6445	15.2115	12.4119
Capana03g000385	106.54	98.9394	108.865	218.42	214.692	194.019	181.3	259.928	237.496	178.012	138.352	182.73	222.021	168.564	276.34	269.945	261.917	155.448	198.138	224.755	205.076	194.779
Capana03g000534	23.5025	20.4074	21.6333	23.704	26.5636	25.5006	35.792	36.9085	49.8089	36.0181	35.0734	43.8236	44.4443	50.6456	64.1253	65.5069	67.1785	66.8189	58.0021	24.8817	25.2319	26.2157
Capana03g000547	18.4619	25.4062	34.0385	51.3511	61.8295	38.7203	62.7473	48.8272	73.2435	25.942	15.3088	19.1897	228.117	72.9062	285.415	244.286	241.702	60.1796	104.013	125.365	122.243	108.184
Capana03g000595	12.2314	5.45183	4.82197	0.518667	0.792663	0.947882	1.70768	2.11666	0.493426	0.21244	1.80172	2.07933	3.20145	3.66328	11.1893	8.8035	15.065	1.66934	6.11769	1.23934	2.68842	1.6235
Capana03g000715	1.02993	0.292718	0.293637	0.12606	0.143027	0.071472	0.999547	0.48661	0.017042	0.335232	1.65308	0.897313	0.226957	0.215842	1.65936	2.90744	4.24707	0.039323	0.740054	0.182424	0.110566	0.087297
Capana03g000729	11.4634	11.9685	12.193	4.4153	5.06832	7.11785	2.73245	2.96338	1.48978	0.350995	0.009641	0.033605	17.2882	19.0479	29.2987	23.7636	25.447	9.16318	16.1726	0.87175	1.76278	3.53707
Capana03g000778	173.11	17.9833	63.8357	316.806	1239.43	1016.33	254.332	87.2046	198.032	2.84159	1.14878	0.768229	5586.01	2953.06	4453.1	5102.73	4085.11	1790	1762.39	8.5972	6.42042	15.7577
Capana03g000851	20.0489	23.2667	20.6136	18.4172	17.9039	19.7479	24.3201	31.0082	33.8051	18.9834	23.1192	19.568	39.9773	45.094	58.7109	68.1665	77.7632	46.8594	43.5924	21.6176	23.1362	19.9733
Capana03g000871	3.03016	1.94586	1.5748	2.612	3.81664	2.70041	1.17489	0.690479	0.403539	0.305937	1.65135	1.84567	1.86835	1.84113	5.97072	6.28932	11.9097	0.628853	0.743534	0.456154	1.30527	0.283652
Capana03g000910	1.13412	0.995422	1.38495	0.358449	0.425814	0.451811	1.91188	0.334548	0.479317	0.037151	0.577427	0.33838	0.893934	2.02036	3.47672	3.71974	5.69638	0.736096	0.857764	0.461138	0.384268	1.27225
Capana03g001005	6.12153	6.10441	6.09965	8.48705	9.0006	6.34354	4.84973	11.6825	6.97828	9.50109	30.4114	24.3417	5.94386	6.54693	23.7789	39.5628	57.2872	5.33186	5.57504	5.05466	7.76168	5.34099
Capana03g001013	0.324692	0.535359	0.35974	0.255578	0.037823	0.387625	0.361147	0	0.037796	0	0	0	0.079592	0.099381	0.881353	0.573995	1.15764	0.030167	0.219664	0	0.116084	0.104234
Capana03g001041	299.564	288.599	306.47	507.027	448.053	511.376	430.036	1077.99	1040.48	26.171	33.1745	35.2921	1741.41	1125.32	2237.24	1872.4	1719.07	449.722	457.648	184.692	156.918	145.633
Capana03g001050	0.080779	0	0	0.031684	0.093039	0.185533	0.853563	0.695048	0.189738	0	0.268338	0.052277	78.1318	82.1573	329.212	207.714	3.26167	12.6411	117.485	0.099916	0.191184	0
Capana03g001063	2.36288	2.1746	1.99783	2.74863	3.38144	3.79115	2.63701	6.73297	4.08328	3.92287	54.9207	11.5289	15.5736	15.2169	59.8424	99.4172	169.529	6.37177	5.6434	9.12382	23.0985	21.1229
Capana03g001123	5.53252	5.14967	5.53897	7.62046	6.88383	8.98437	7.38887	10.6912	12.5994	5.73958	5.54309	5.85335	10.4877	9.39461	12.9153	13.1472	12.3188	8.85354	9.01978	8.55358	6.86919	7.36357
Capana03g001161	2.59712	3.71799	3.39049	3.86411	4.88458	3.68978	3.24742	5.81804	4.75326	2.80226	2.43666	2.64226	5.81458	6.70692	8.56671	11.6046	11.3003	5.60454	3.92665	5.47261	6.03438	7.68373
Capana03g001227	15.6905	5.24066	7.60642	0.566381	0.893947	0.316169	4.31468	6.01341	4.59323	0	0.545822	0	0.666152	13.2643	27.7228	26.13	0.187702	0	11.6132	0	0	0
Capana03g001317	0.053141	0	0.02286	0.027967	0.054495	0.207626	0	0.027819	0.055826	0.080926	0.622779	0	0.39116	0.121073	0.37017	0.529898	0.417598	0.109543	0	0.154046	0.023344	0.03699
Capana03g001417	0.158631	0.106383	0.127491	0.19805	0.147485	0.21984	4.08688	0.891034	0.521301	0.030728	0.042479	0.297136	0.350065	0.901716	2.16847	2.95663	1.69958	1.93374	1.38213	0.729751	1.36191	0.627699
Capana03g001684	0	0	0	0	0	0	0.3067	0	0	0	0	0	1.60143	13.6974	4.35703	13.2841	5.67439	0.871181	1.03522	0	0	0
Capana03g001811	26.1216	24.9445	23.2938	19.2747	20.9767	21.8514	32.8952	20.4804	31.1773	12.43	7.17815	3.64299	65.1469	78.8968	103.663	58.5096	53.5953	36.6474	69.2598	6.72111	14.9065	20.8161
Capana03g001814	4.84884	0.924819	3.58293	10.8033	11.3587	12.4303	8.25584	9.58471	10.2878	7.68724	9.6163	7.85328	5.45895	5.66589	15.8828	15.4769	22.3368	4.86243	7.04634	6.07775	7.64312	10.4815
Capana03g001954	0.593519	0.625175	0.451064	0.365617	0.537813	0.814387	0.774869	0.882265	1.13686	0.610474	4.70258	1.26243	1.16197	2.01076	6.59519	5.95812	8.63711	2.53047	1.76677	0.82514	1.70167	1.36992
Capana03g002038	0.158126	0	0.212749	0	0.25383	0	0.230754	0.254181	0.486092	0.371785	1.29238	1.88107	0.095492	0.715627	4.38716	3.88024	10.3394	0	0.642866	0.806061	1.64758	1.52673
Capana03g002039	0.292204	0	0.083183	0.06043	0.176924	0	0.240894	0.079702	0.040389	0	0.374996	0	0.125026	0.389297	0.416631	0.874032	0.650828	0.126657	0.092015	0.063594	0.181915	0
Capana03g002056	0.048265	0	0	0	0	0	0	0	0	0	0	0	0	0.055095	0.693946	0.330821	0.370751	0	0	0	0	0
Capana03g002387	10.1532	7.71711	10.485	15.5988	11.0464	15.9924	7.58026	8.18561	6.19593	6.2486	9.20487	7.22232	21.8764	23.9587	20.6264	28.6828	26.3536	18.2586	16.9903	6.36266	7.06541	7.36428
Capana03g002564	6.07205	5.68122	5.80161	9.56408	11.9264	9.49069	9.78164	17.2485	17.3629	13.4434	10.1638	9.88843	11.0326	9.99875	17.4182	15.043	17.7307	13.1885	10.4214	7.79934	6.60221	7.42542
Capana03g002611	1.47687	1.07656	0.666531	0.26127	0.374739	0.12721	1.62838	0.806133	0	0	0	0	3.13067	3.51959	7.4586	4.20113	2.50825	0.746645	2.58845	0	0	0.046498
Capana03g002680	0	0	0	0	0	0	0.060409	0	0	0	0.203465	0	0.330253	1.18489	10.1934	4.22576	21.6677	0	0.345892	0.278736	0.514058	0.164242
Capana03g002685	0.039893	0.125527	0.172763	0	0.030938	0.015424	0	0.015616	0.014964	0	0	0	0.114994	0.102475	0.231709	0.209407	0.055124	0	0.105606	0	0	0.021457
Capana03g002740	7.20089	8.43029	4.98182	14.5085	11.7909	12.0312	6.04429	11.0297	8.14923	5.88467	6.60192	8.01209	5.51253	8.9179	11.9189	12.4877	14.6088	6.7259	0.426912	4.59924	12.3526	8.84559
Capana03g002775	2.03743	1.92779	1.90878	3.30506	4.36848	3.87974	4.30932	1.9571	0.692168	1.17141	0.893014	1.00771	14.2509	11.7269	12.511	11.1763	11.9995	8.57656	6.74002	1.5104	1.34925	1.24696
Capana03g003006	1.6407	1.12115	0.75789	0.621225	0.888994	0.782301	2.57723	1.72993	2.49345	3.45444	1.72823	2.17901	5.14737	4.23846	12.3287	12.8011	13.1537	7.77745	6.36465	3.85816	4.61862	3.43813
Capana03g003098	4.77949	3.25049	4.81448	3.81753	5.25483	4.21951	5.44168	6.20865	6.55742	3.363	3.6539	3.66028	9.54514	6.86817	11.1874	11.7936	12.8623	8.22548	6.43913	4.97095	5.06066	4.02302
Capana03g003248	0.304862	0.366191	0.347382	0.732091	0.62979	1.01591	0.307184	0.66831	0.388049	0.233704	0.294886	8.49758	29.0836	16.866	22.0313	30.6911	27.1763	6.03737	22.4925	0.197811	0.595898	0.769219
Capana03g003349	8.18258	5.88992	6.27232	4.60319	5.02659	6.48339	6.35428	8.63941	7.02426	1.59693	0.973941	1.6952	15.3625	15.8412	30.6253	37.4289	47.0306	18.7441	10.2264	5.37666	7.37831	5.85899
Capana03g003398	1.22358	1.13932	0.691785	0.703248	0.879583	0.546213	1.01945	0.796301	1.19164	0.123303	0	0.124134	1.50612	6.83251	9.33676	9.10379	5.25796	0.555409	1.07597	0.624969	1.11487	1.04472
Capana03g003472	3.91604	9.57109	4.8334	1.27255	1.66883	2.4679	12.3179	10.2789	7.03802	7.03341	8.30221	10.6845	1.60828	1.37362	17.0976	18.4534	21.6087	10.8963	9.31153	6.29715	8.8706	8.39813
Capana03g003618	0.927688	1.18607	0.919107	0.917505	1.24934	1.51829	1.84652	2.08438	4.38786	0.664351	0.699752	0.653052	2.30288	4.19752	7.39924	9.13589	9.99462	7.92467	5.72801	0.710115	0.739192	1.06252
Capana03g003648	4.5677	6.26579	8.49831	8.15687	9.87604	9.85038	3.14443	5.29489	2.45025	0	0.076802	0.131397	18.3332	30.219	41.5007	55.8054	45.6321	44.818	31.6681	1.51773	2.11601	1.29406
Capana03g003907	0.113166	0.246139	0.148644	0.209309	0.158337	0.106245	0	0.1686	0.031041	0	0	0.034668	0.196799	2.36992	0.619716	4.68949	1.13119	0.2427	1.17875	0	0	0.083612
Capana03g004092	0.38708	0.378205	0.776385	0.475753	0.481782	0.373918	0.331157	0.656094	0.356888	0	0.040362	0	0.982561	1.24577	1.008	1.9772	1.43961	0.127345	0.080798	0	0	0
Capana03g004306	1.03151	0.611606	1.30319	0.702689	0.659822	0.462809	0.361722	0.052509	0	0	0	0	1.60175	1.83772	3.51237	3.70625	3.67965	2.52851	2.20576	0.159929	0.371927	0.103966
Capana03g004318	1.3583	0.295406	0.128344	1.18028	3.58077	2.83097	1.19378	2.46961	1.09333	0.766794	1.02748	0.652664	4.85172	3.94072	0.959041	6.28712	4.41302	3.18307	0.194602	2.01549	1.51809	2.8707
Capana03g004515	2.03815	0.798944	0.68099	0.779251	2.32485	0.428002	10.9056	3.35203	0.075218	0	0	0	17.0899	26.7529	54.9969	30.3517	11.9195	6.29428	30.2306	0	0	0
Capana03g004591	1.00956	0.311248	0.756424	0.685772	0.58713	0.819937	0.689701	0.296897	0.532191	0	0.168502	0.268882	0.656892	3.36364	4.04003	4.08882	4.73359	0.658233	1.37952	0.907597	1.97702	1.90082
Capana04g000026	113.399	127.529	132.199	119.86	131.035	119.07	64.3337	95.7743	92.4858	125.739	133.386	123.388	122.264	116.706	149.277	164.76	147.361	107.042	89.9178	44.2662	54.6495	54.9961
Capana04g000063	30.1917	21.2243	19.5633	14.8379	16.1274	18.612	16.0762	17.4735	17.5078	14.8251	15.6545	13.7637	20.5954	18.8844	33.4537	32.8369	32.8495	23.3045	27.1469	25.1956	25.0592	26.1858
Capana04g000076	0.241668	0.196198	0.426381	6.35026	6.04837	9.63573	2.47303	4.7878	2.3118	9.24994	16.8428	11.145	16.0953	15.8453	22.904	35.1119	48.7319	5.1521	4.58146	3.81504	6.84494	5.02872
Capana04g000114	6.4774	8.99188	6.95069	30.7165	23.6028	39.6714	17.5325	24.3714	25.8853	1.70348	4.41527	1.81031	63.379	42.6315	128.111	113.138	95.1208	45.3225	59.8037	7.38299	9.7834	9.70324
Capana04g000139	0.924462	2.56804	2.83195	1.52458	1.66561	7.9137	4.79785	8.44187	3.13907	0.906938	1.20069	0.114905	12.6593	27.8133	33.763	35.1936	48.4938	5.03937	7.81923	5.27066	12.1932	7.84033
Capana04g000213	91.3129	113.501	122.665	221.867	224.044	195.499	130.113	209.218	237.257	238.306	152.404	186.044	257.91	173.432	279.79	264.943	266.852	200.839	199.798	142.107	147.987	146.44
Capana04g000361	29.9291	23.1617	30.3023	11.9435	9.21724	12.0445	40.136	24.6007	28.5679	22.5117	14.5887	16.3023	19.8347	17.8622	40.4543	33.955	32.5094	17.0512	20.2513	22.0576	24.5705	17.177
Capana04g000372	0.520139	0.282213	0.119774	0.087822	0.06877	0.051427	0.139354	0.163321	0	0	0	0	0.811763	0.862471	1.4333	1.38207	1.81524	0.149331	0.137989	0	0	0
Capana04g000431	1.14196	1.06069	0.854059	0.861687	0.626463	0.885289	0.737305	0.86615	0.675296	0	0.122315	0.040324	0.664136	1.09987	2.63597	1.34168	1.28033	1.08657	0.860996	0.373742	0.326793	0.526557
Capana04g000468	2.64752	4.04986	2.77004	3.68032	4.05833	2.60926	3.59482	5.71753	5.11512	0.255602	0.341832	0.255307	6.3213	0.443245	7.21815	6.66093	6.93928	1.72775	0.232938	7.02118	0.642245	7.69594
Capana04g000651	5.39805	7.54128	7.10295	7.1167	7.40219	6.8969	8.31571	10.3782	11.0658	10.3155	8.86191	11.7844	12.9478	12.6108	14.4809	14.2775	14.713	6.70977	8.56687	8.46208	13.1533	8.92583
Capana04g000785	2.79688	7.41838	4.81409	1.63216	3.40653	2.86453	4.65868	5.37157	3.88125	0.875402	0.069799	0.192378	5.37756	6.21797	11.0952	9.81083	10.2721	3.09486	2.94537	0.288357	0.498429	0.718006
Capana04g000788	3.75051	6.71014	4.4467	31.9074	30.8455	39.0358	16.6999	23.8605	34.3974	16.3575	22.3876	22.4549	31.3987	26.0903	43.7491	50.5895	46.851	38.4627	32.3907	11.6078	13.2853	14.582
Capana04g001014	0.048282	0.122237	0.183123	0.744751	1.20506	0.813908	0.467921	0.705406	1.22653	0.378509	0.312591	0.288708	1.39948	1.0355	1.58575	1.46766	2.32384	1.00519	0.597315	0.144243	0.269814	0.506627
Capana04g001042	6.48318	4.38998	6.89805	1.63962	1.76724	2.33038	0.303989	0.646568	0.692981	0	0	0	23.7192	31.2253	12.8063	28.7276	27.9343	14.2875	9.89995	0.220632	0.351049	0.925412
Capana04g001109	0	0	0	0	0	0	0	0.032197	0	0.023611	0.054717	0	1.13102	0.97113	1.53344	1.91392	1.65422	0.262409	0.182888	0.204826	0.765557	0.50933
Capana04g001403	0.56222	0.673995	0.329566	0.241726	0.263285	0.092586	0.496084	0.235486	0.153798	0	0.089129	0	0.534137	0.286151	1.54658	2.0836	1.99585	0.235766	0.276083	0.228343	0.390947	0.400053
Capana04g001726	1.02458	0.051816	0.522708	0.042381	0	0	0.672355	0.45952	0	0.042005	0.785475	0.062436	0.79758	1.10501	1.45119	1.98847	4.02751	0.626921	0.94115	0.266188	1.46876	1.68319
Capana04g002283	3.72939	5.22928	3.78414	5.11797	5.02801	5.12243	5.95134	3.87885	3.76823	0.748719	0.392048	0.695233	7.49239	6.78421	10.2682	8.91228	8.38237	5.94283	6.17191	3.88823	3.78586	5.05061
Capana04g002426	0.269367	0.107005	0.1484	1.05312	0.72868	1.40097	0.63636	1.33841	1.30576	0.984681	2.46735	1.09833	1.37873	3.48452	4.41723	3.91129	4.07748	3.01508	1.23381	1.70508	2.75236	2.18074
Capana04g002598	10.7501	2.9443	4.49614	2.71998	3.11616	2.01045	0.751063	1.5551	0.997282	0.494657	0.504623	0.240015	5.24342	8.50942	6.75841	9.13755	8.07104	4.36037	3.43316	2.45121	3.55205	2.47951
Capana04g002804	0.039877	0	0	0	0	0	0	0	0	0	0	0	0	0.112356	0.098587	0.216524	0.132933	0.013176	0.171063	0.034377	0	0.079692
Capana04g002807	0	0	0	0	0	0	0.056085	0	0	0	0	0	0.634685	1.95586	2.88952	3.87506	1.63133	0.212742	0.229486	0	0	0
Capana04g002812	1.49007	2.70886	6.88664	2.56167	2.80957	3.06688	1.8053	7.88302	7.22832	1.12659	1.09457	1.21141	5.06888	5.08898	6.4454	6.47086	4.95197	5.00701	5.6986	4.12925	4.94587	3.59308
Capana04g002813	10.0562	7.41029	8.71823	4.05015	4.21023	5.51905	8.11388	6.3372	6.01235	4.58225	4.50218	3.94969	8.34985	9.10121	18.5467	12.5547	12.1308	6.75342	10.0098	7.49802	10.3342	9.4571
Capana05g000124	10.1462	8.75137	7.11053	4.14314	4.52485	4.35769	8.19838	6.29608	5.1713	3.37843	4.65224	4.49337	5.7489	8.66583	15.1488	16.3788	15.8576	6.11657	6.27571	3.38348	5.90451	4.28596
Capana05g000220	30.6914	34.729	41.2855	26.6035	30.5431	35.8297	23.1687	26.1352	34.7349	2.75338	1.43157	1.54655	37.837	38.1079	51.0606	61.5274	58.1315	37.4119	28.3488	5.37218	8.0127	8.60955
Capana05g000260	0.191381	0.456907	0.048322	1.12177	1.71311	1.42342	0.648502	1.03758	1.4686	0.146891	0.085103	0.149517	0.838059	1.37203	2.95995	3.20592	2.57765	1.4185	1.06759	0.138074	0.152391	0.656867
Capana05g000341	47.3796	53.8338	39.7629	60.6223	62.4258	64.246	50.2819	47.4156	47.1085	49.7172	46.1901	47.8266	69.0962	88.8168	108.628	126.477	113.78	104.743	93.8246	36.1021	44.0348	45.411
Capana05g000375	7.26863	7.37175	8.77393	8.16129	8.73701	4.95432	3.94953	5.90691	5.16652	3.51677	5.48949	3.52937	6.17133	8.87334	9.14273	12.9033	13.5084	8.90181	7.89842	7.01515	9.80543	10.4091
Capana05g000378	25.8635	27.5478	25.4129	10.8608	13.5307	13.7111	26.2146	14.8399	10.7641	12.6818	11.7867	10.2447	24.2834	27.2021	37.9376	38.0992	36.3862	24.628	22.0846	24.3551	28.0998	28.306
Capana05g000605	0.133204	0.114978	0.096657	0.125391	0.07671	0.336537	0.124199	0.061845	0.233197	0.091165	0	0.046181	1.37733	1.95763	1.35135	1.90966	1.41538	0.642571	0.42768	0	0.341082	0.654488
Capana05g000800	7.00809	5.21598	6.13263	5.13493	5.7893	5.97632	4.17541	5.3963	5.8586	8.66272	7.85743	7.82194	13.8113	23.6782	19.6632	40.0799	17.0955	7.15653	6.56807	3.11198	3.65298	4.60121
Capana05g000810	0.992307	0.807245	0.851543	2.26761	2.19656	2.47846	0.143754	0.288136	0.297313	0.305709	2.68884	0.459936	2.79313	3.89625	8.9086	8.8538	10.3072	2.28503	2.41475	1.4652	1.95765	2.53048
Capana05g000920	11.3774	6.13393	6.37448	1.50459	1.77347	1.19148	4.664	1.30617	0	0	0	0	9.7867	12.306	23.821	16.0396	9.27544	2.25381	8.5795	0	0.269991	0
Capana05g000937	6.36569	7.12105	7.96206	4.02225	5.34103	4.65403	2.06981	6.77045	6.07315	1.47724	1.71826	0.559981	6.7725	8.26102	11.2976	11.6661	11.2865	3.13536	3.07028	4.07826	7.17799	4.20802
Capana05g001042	0	0	0	0.086284	0.088783	0	0.101815	0.034332	0	0	0	0	0.400546	0.528649	1.13607	0.528469	0.060193	0.143095	0.46542	0	0.052065	0
Capana05g001336	0	0	0	0	0.020823	0	0	0.023958	0	0	0.074431	0	0	0	3.28206	3e-06	0	0	0	0	0.069206	0
Capana05g001347	4.39839	2.6438	4.17	3.2061	3.93196	2.57468	4.65144	4.93706	3.9576	3.26462	3.89749	3.39749	4.20275	4.8562	7.7442	8.87977	8.12769	4.23979	3.42601	4.16102	5.24217	4.98067
Capana05g001398	34.0332	35.7123	44.3252	55.0237	48.4728	58.1645	28.5477	49.8534	56.7659	79.2061	61.2336	53.7604	74.0229	69.3296	66.7947	73.2032	81.4495	56.5354	43.0837	18.5755	16.2874	23.8457
Capana05g001949	18.9497	24.1869	24.3074	92.4909	154.153	157.422	63.8606	134.495	61.6617	32.3418	44.0978	55.6221	151.767	49.1109	208.742	295.801	340.617	34.1805	38.4289	27.3703	34.5662	20.6537
Capana05g001951	17.479	12.464	13.0088	23.1746	26.4804	24.3819	12.8817	16.6174	7.96117	0.078582	2.50731	4.00221	33.429	24.2095	59.3406	69.4794	53.8623	13.6322	11.9601	2.48221	4.75528	5.05234
Capana05g002056	0.27873	0.087615	0.215716	0.214511	0.350611	0.059802	1.52806	0.511302	0	0	0	0	4.5615	6.71728	16.5842	6.76939	0.282321	0.909717	7.09923	0	0.054053	0.048327
Capana05g002058	0.249832	0.101281	0.167275	0.126871	0.427175	0.06989	2.18405	0.924537	0	0	0	0	3.59623	3.65781	8.42172	4.11356	0.389851	1.20198	3.75142	0	0	0.107937
Capana05g002266	3.48177	4.17119	3.73703	138.983	101.337	138.378	60.6104	88.9273	101.926	29.6563	61.2516	23.1694	82.8712	107.924	255.852	219.92	258.787	65.5562	52.3053	11.4146	31.8809	20.2984
Capana05g002486	3.25892	2.85397	3.29167	1.72999	3.0903	4.4014	2.72198	7.72743	12.3194	4.60261	4.79996	2.65172	19.7888	17.1711	13.9398	14.4802	18.0659	7.06156	4.34565	7.56967	8.21679	7.01823
Capana05g002508	0.998633	0.398078	0.372105	0.103722	0.176717	0.07008	1.77026	0.250534	0	0	0	0	0.242358	0.497327	4.17334	0.940857	0.042095	0.115219	1.11288	0.085249	0.381216	0.097334
Capana06g000005	0.683801	1.66189	1.33128	0.596546	1.2753	0.538025	2.95629	1.9926	0.640091	0.034805	0.06945	0.12146	6.10872	5.38067	35.7275	27.7853	21.3625	2.71049	5.14246	0.405377	0.763723	0.93181
Capana06g000114	3.31401	1.29585	1.90613	0.949051	0.934595	2.09884	2.38312	2.70358	2.84457	6.69463	7.65771	7.13091	9.34767	12.2969	9.65875	13.3945	13.1944	11.1676	7.94492	4.47468	3.99508	4.53582
Capana06g000179	0	0	0	0	0	0	0.044203	0	0	0	0	0	0.825306	4.73425	11.3305	21.574	8.56117	0.284918	0.709474	0	0	0
Capana06g000346	17.2092	24.0143	18.8437	80.4923	65.4262	90.6269	41.4142	63.03	63.1173	108.084	174.082	93.4611	183.861	153.04	171.787	162.137	230.755	148.802	129.459	69.1932	98.9782	79.1728
Capana06g000391	32.8499	27.9923	30.7343	45.2595	55.324	44.5571	44.8457	84.4857	65.8159	9.92738	9.09364	12.4999	67.389	69.1656	120.917	117.059	113.696	55.6602	41.3077	4.4086	5.62274	7.32462
Capana06g000431	24.9116	30.1975	32.0079	97.9291	84.6049	87.2737	49.988	93.5399	98.5443	49.0402	37.4589	49.4249	63.038	46.1653	97.4935	94.039	104.374	83.0499	73.1212	67.5261	71.8679	60.9327
Capana06g000460	0.528479	0.979572	0.933297	0.59396	0.774221	1.36201	3.53908	2.67708	1.89532	0	0	0	4.45029	4.3313	9.25173	7.04012	7.70401	2.98101	3.24426	0.328651	1.10182	1.28138
Capana06g000583	4.15233	1.76026	1.27238	2.57943	2.42487	1.23208	1.73197	3.42309	0.85001	3.14264	9.31209	5.94422	1.16741	2.66532	7.61826	8.78379	11.1415	4.72828	4.59023	0.705618	1.3665	1.18877
Capana06g000663	15.4611	18.2676	16.1805	16.5711	14.9672	18.4202	23.053	27.6192	25.4336	17.9562	35.4418	22.3113	25.5584	22.4995	34.3108	36.9375	41.7732	20.7228	23.3721	24.8346	31.8704	26.8994
Capana06g000674	10.0859	6.13656	7.55671	0.041847	0.509455	0.916992	31.3464	0.678799	0.083134	0	0	0	4.30353	14.1928	62.4583	8.84461	0.029029	1.1146	31.7882	0	0	0
Capana06g000675	11.3614	7.21922	7.82076	1.12276	1.12114	0.834332	25.0399	1.85067	0.13423	0	0	0	5.56448	6.42236	65.2587	3.73973	0.221263	4.90865	22.7005	0	0	0
Capana06g000687	0	0	0	0	0	0	0	0	0	0	0	0	0	0	0	0	0.073878	0	0	0	0	0
Capana06g000755	0.631269	0.67055	0.272793	2.00394	1.81382	1.91138	2.7547	0.226538	0.799144	1.03164	1.17855	0.79183	0.230364	0.391286	2.60352	3.10968	5.8252	1.87833	1.18114	0.400571	0.607933	0.283436
Capana06g000792	4.63736	4.33593	19.062	0	0.408311	0.929294	2.43664	0.125797	0.215663	0	0	0	12.1133	18.7087	26.3338	29.5263	35.0965	2.96382	5.60142	0.099702	0.68453	1.00491
Capana06g000793	0.611775	0.575496	1.27915	0.139859	0.335329	0.248667	0	0.28569	0.09487	0	0	0	0.516954	0.444965	1.17662	1.34503	1.68818	0.374363	0.349034	0	0	0.096948
Capana06g000794	0.292111	0	0.630269	0.100804	0	0	0	0.098268	0.050305	0	0	0	0.159554	0.83189	1.04749	0.717041	1.46044	0.077948	0.105992	0	0	0
Capana06g000927	0.698755	0.454264	0.295426	3.85397	4.77263	8.28008	28.2365	33.7831	73.1395	2.23657	1.60068	4.06776	49.0051	26.0565	48.033	46.6664	53.459	13.0457	25.2922	3.34271	2.89495	2.64728
Capana06g000974	4.17324	3.33544	4.01168	1.94789	3.31416	2.11482	2.73884	3.82143	2.7784	7.56605	12.2558	8.43486	8.54473	13.6197	21.2629	24.074	32.8316	5.0043	6.0222	7.97375	10.0745	9.20797
Capana06g001068	23.9168	6.5883	9.3718	10.3029	16.1805	16.2129	43.5413	81.7772	75.4666	1.88034	3.20286	4.55653	69.8193	50.7709	89.3324	86.3709	89.2487	20.4271	21.8548	2.61118	6.02688	5.82096
Capana06g001083	23.606	13.1709	16.9026	5.56904	6.78838	6.0107	9.69549	4.72958	2.02467	0.189652	9.00503	0.895647	39.4917	41.8838	46.5658	27.9522	28.3751	9.23864	18.3491	2.7553	7.65161	7.05054
Capana06g001169	0	0	0	0	0	0	0.22931	0	0.069128	0.033608	0	0.018026	0.272781	0.199028	1.13844	0.393525	0.616907	0.049146	0.505608	0.072157	0	0
Capana06g001256	5.96611	6.13775	6.17728	4.96581	4.59737	4.42169	4.77246	6.55794	8.16889	2.81719	3.17459	2.2941	7.0722	7.88454	11.3565	9.60572	12.1562	4.95064	3.99478	5.59392	6.32862	5.1231
Capana06g001338	2.27054	1.59974	2.75617	2.76701	2.38541	3.13715	1.01318	1.29761	0.632711	0.951547	1.37535	1.8768	2.97987	2.76868	3.44375	3.77169	4.5206	2.36093	2.04349	3.02069	2.63923	2.30486
Capana06g001403	0.120965	0.101202	0	0.028438	0.067903	0.083262	0	0	0	0	0	0	1.75538	1.75569	1.9764	1.80584	1.31251	0.501197	0.515377	0.430659	0.418977	0.249305
Capana06g001405	0.724064	1.27204	1.80408	0	0.020294	0	0.406462	0.078095	0	0	0	0	0.097719	2.1552	0.813852	5.21988	2.33622	0.894544	0.486048	0	0	0
Capana06g001685	0.112868	0.323484	0.112662	0.374645	0.411684	0.091709	1.02831	0.855995	1.74935	9.28053	5.09604	5.81121	22.2295	24.0859	29.7173	36.6221	36.0088	9.0468	6.56466	1.37107	1.26192	2.27397
Capana06g001783	11.9956	10.389	11.8845	4.62945	5.30886	5.92092	5.8417	5.20336	7.53835	1.16837	0.321606	0.81856	8.13913	32.7545	27.0079	58.9408	33.0959	5.93835	7.6104	1.75446	2.16427	1.54443
Capana06g001990	1.19975	0.81627	0.803857	0.204099	0.418806	0.150357	1.7238	0.738281	0	0	0	0	3.32554	2.9623	4.16598	4.14117	2.9915	0.107313	0.813084	0	0	0
Capana06g002146	46.8663	47.6656	46.5298	60.989	56.4673	58.753	59.9487	74.4009	71.4671	60.0211	60.3535	60.1855	86.4516	78.8456	88.5987	89.5034	87.738	57.5609	68.2292	64.2054	64.7985	59.1268
Capana06g002718	39.3844	29.0402	26.1679	11.801	13.4963	10.4788	29.6803	41.0584	27.4162	15.1012	40.9672	31.6021	17.9918	18.4327	63.3531	56.065	51.8002	15.4617	25.0046	30.0714	34.6697	40.5166
Capana06g002873	635.837	715.1	671.128	1275.98	1304.66	1250.07	452.738	779.753	710.036	568.765	653.815	594.168	1624.05	1340.07	1689.21	1661.8	1602.95	1231.23	1218.67	743.65	779.827	629.881
Capana06g003007	2.05847	2.12996	2.76274	18.2084	21.2766	19.2721	6.61757	18.551	6.60318	1.60985	9.43863	5.68325	10.1667	10.1677	19.8417	24.971	58.2138	4.58109	3.69609	2.39107	5.07724	3.11999
Capana07g000077	5.7769	5.92243	6.2439	0.050231	0.442507	0.098047	2.83011	0.892777	0.37601	0.180166	0	0.62604	3.83587	26.5137	8.20543	31.8286	13.6955	6.20145	9.35099	0.23708	0.449093	0.19963
Capana07g000147	2.35229	1.22184	1.42239	1.3214	1.32218	0.49952	7.22146	4.92056	0.152851	0.085006	0.102859	0.075905	18.093	22.4259	56.4687	22.6345	12.298	3.01019	31.9579	0.172497	0.366943	0.687623
Capana07g000348	0.124077	0.184207	0.123883	0.116942	0.217999	0.384054	0.494657	0.884227	2.20334	0.346419	0.196314	0.443925	0.089997	1.10772	1.218	2.51523	1.60022	0.219411	0.853517	0.183849	0	0.243851
Capana07g000527	0.665457	1.15422	0.759706	0.785684	0.994022	0.551471	0.718137	0.592003	0.539818	0.450979	6.74283	2.14832	1.95133	5.46865	12.7181	18.1252	32.838	1.51192	2.28262	0.664419	1.71543	1.87703
Capana07g000648	2.95415	1.60811	2.78622	3.43555	2.55429	1.90095	1.99896	3.01489	3.88724	1.03548	1.64759	1.60284	4.43066	3.18677	3.82064	4.89349	4.20617	2.09647	1.49589	1.7755	2.67943	3.19991
Capana07g000710	1.86417	1.74813	2.79421	1.4764	1.91227	2.12766	4.00652	3.57927	3.53699	2.30805	2.30879	1.94928	2.7553	3.926	5.59128	5.80936	6.3851	2.26372	1.66149	2.06445	4.75022	4.40406
Capana07g000730	10.2646	5.19714	7.85367	2.36594	1.85289	1.49357	4.49323	3.36131	0.111505	0	0	0	22.9635	23.6706	95.3673	43.0867	12.8775	3.13838	22.0036	0	0	0.030136
Capana07g000851	0.47084	0.312761	0.559738	1.11449	1.36182	1.41347	1.43761	2.39833	4.0579	0.195387	0.143672	0.136091	5.70002	5.46558	5.87258	4.18353	4.33061	1.47453	1.16787	0.994212	1.17301	1.27946
Capana07g001045	2.16758	1.72933	2.01919	4.72011	2.94055	6.03765	4.53124	5.57448	6.78448	11.8409	10.1925	13.7288	18.9653	17.8189	17.1982	19.4008	17.5252	9.85571	8.65976	5.75445	8.68473	6.98025
Capana07g001146	101.955	95.9185	91.4687	95.0408	89.765	94.6281	136.063	174.193	184.113	100.428	160.351	114.64	157.821	152.188	359.145	365.837	408.065	232.731	172.523	68.7785	91.6146	94.7272
Capana07g001586	1.2944	1.05975	0.621866	0.113828	0.11813	0.294977	0.508314	0.999939	0.231755	0	0.240354	1.36719	0.579659	0.990321	5.93993	7.17141	10.526	0.14211	0.821019	0.056421	0.107689	0.090545
Capana07g001587	0.637305	0.444622	0.459421	0.593787	0.883241	0.941311	0.551763	1.42114	0.970942	0.029954	0	0	1.78279	2.34832	2.41709	2.3485	3.22641	0.686104	0.999668	0.064638	0.262693	0.384434
Capana07g001697	6.43993	5.78006	6.27198	2.12084	4.01019	2.93	4.21207	3.77743	3.82558	4.3487	5.83158	5.79072	4.01129	5.513	6.60014	6.32401	6.24088	5.72405	4.0798	5.47364	5.42409	6.21427
Capana07g001988	7.90867	5.9897	5.54479	13.3557	11.2579	12.7336	13.418	13.86	17.0116	6.45211	5.96725	7.32946	12.5378	11.8739	18.9865	19.145	19.2321	16.5397	16.2587	12.8282	11.9656	10.6618
Capana07g002042	5.86432	6.60604	4.83813	11.2384	12.4069	14.0087	17.9747	27.0632	48.5278	7.48722	7.62231	5.46182	18.8299	20.4145	32.237	36.0077	42.9924	16.6095	10.6566	13.3725	12.1636	11.3635
Capana07g002070	1.49504	1.52122	1.18537	1.56944	1.55644	2.72131	1.72674	2.44491	2.49666	0.77008	1.95585	0	15.6099	11.3956	17.08	21.0625	17.0997	3.78283	4.1631	0.226178	1.31329	1.54462
Capana07g002144	28.7712	29.1388	23.2334	20.0032	25.2169	29.3954	19.3264	12.1778	6.50967	25.9663	114.186	14.276	28.5401	34.08	43.3707	67.5831	78.0666	36.0825	34.2234	4.35276	12.3748	5.41834
Capana07g002146	18.1738	22.236	21.9727	2.68434	5.80248	3.41497	14.109	33.2151	46.5326	3.38646	3.59069	5.59349	27.4368	15.2222	48.3595	48.496	43.6059	3.97813	2.97679	22.092	22.0335	18.8391
Capana07g002213	3.51418	2.27359	1.75609	4.46622	6.79474	5.76624	2.7541	6.85539	3.92265	0	0	0	5.39442	3.44947	14.0282	10.5266	7.68158	0.890106	2.64386	0	0	0
Capana07g002408	2.05618	2.47272	2.60001	10.0491	9.64749	11.7422	5.13756	7.59612	10.2416	10.9374	8.55892	10.2936	9.79656	8.1356	14.6883	12.5675	10.7819	6.642	6.80592	7.24583	7.80377	6.19345
Capana07g002440	1.24998	1.09849	1.67684	3.21208	2.79962	4.40457	4.21274	11.382	13.2031	1.19097	0.9502	0.943917	24.6067	23.4326	31.2434	33.9064	35.4113	25.1502	16.136	2.46096	3.21837	3.09102
Capana08g000058	0.840337	0.133816	0.110116	2.16604	0.32792	1.90455	0.563033	0.26751	0.417109	0.452014	0.926828	0.945269	0.674206	0.904448	1.55475	2.51948	2.26806	1.25634	1.71566	0.255069	1.52028	0.138852
Capana08g000088	0.150751	0.294286	0.107553	0.427235	0.18901	0.346791	0.486562	0.385124	0.501526	0.0605	0.667494	0.476987	0.28039	0.949348	1.88925	1.52389	2.34662	0.586862	0.593834	0.721753	1.46844	0.779775
Capana08g000119	0	0	0.049443	0.042279	0.087339	0.023696	0.049803	0	0	0	0	0.070869	0	0	0.268273	0.204329	0	0.035929	0	0	0.165617	0.065364
Capana08g000144	14.9615	9.725	15.3753	10.5433	12.4471	11.5335	18.5413	4.69146	4.71887	0.219505	0	0	26.7071	39.3885	36.5247	65.5435	31.9699	20.1996	23.1837	1.21358	4.64248	2.29146
Capana08g000206	0.24958	0.599932	0.537088	3.4844	4.44733	5.53046	2.73859	4.64459	4.06066	0.035887	0	0.031873	3.10852	3.1869	8.18445	9.31498	8.04758	2.4825	1.58431	0	0.340415	0.171976
Capana08g000300	3.58268	3.54475	3.79378	2.64061	2.99956	3.18832	2.25609	1.81652	2.04179	3.11915	2.75573	2.90717	3.14489	2.58011	3.86156	4.33204	4.16482	4.20229	3.77041	2.73515	3.65046	2.14048
Capana08g000841	0.031266	0.020721	0	0.07358	1.00367	0	0.772367	0.589322	0.945653	0.266411	5.36267	0.811541	0.106974	0.181767	5.47543	3.97397	12.7676	0	0.208441	0.80904	5.2652	1.5053
Capana08g001381	0.227594	0.215206	0.07791	0.072343	0.291554	0.18459	0.293455	0.095816	0.02297	0	0.342888	0.100198	0.516466	0.702685	1.17132	0.387893	0.806651	0.025667	0.239748	0	0.272649	0.464532
Capana08g001408	2.13852	1.57021	1.55521	0.686393	0.781572	0.337562	1.80095	1.18628	3.08249	2.93071	6.16883	3.4406	0.708909	3.42043	6.7504	10.0107	15.6102	0.203747	0.713087	0.562693	1.43639	1.25347
Capana08g001518	0.976768	1.418	1.16111	0.385845	0.503454	0.404454	1.43944	0.847337	0.83098	0.178659	0	0	1.74792	3.80159	18.884	4.98508	0.656655	4.48695	11.3053	0.282829	0.058908	0.447265
Capana08g001589	0.881313	1.082	1.02248	0.385787	1.11764	0.31996	5.47387	1.72586	0.391936	1.16574	7.60709	1.82874	0.65459	1.66958	7.04004	9.00295	16.7276	1.59462	3.29495	0.347333	1.21293	3.08242
Capana08g001686	5.35372	5.99489	4.58725	5.10809	5.12253	5.63987	6.43371	6.68446	6.10977	2.09582	2.84305	2.94341	11.6241	10.0722	11.5515	11.573	10.2208	5.49145	6.90884	2.48202	3.30778	4.51039
Capana08g001724	19.6546	12.9523	11.5523	6.88265	4.29273	8.31071	3.77541	2.37712	4.28176	1.42933	0.798997	0.855983	33.5126	32.5222	40.27	41.5958	38.0516	18.6931	14.7062	4.08676	8.17064	7.95496
Capana08g001792	11.1517	9.04885	10.6173	13.0034	13.9563	15.7264	14.3134	18.8083	20.254	21.877	29.3002	22.4154	20.8201	17.5888	28.5697	37.8256	33.9011	21.2304	21.1846	16.1569	14.6952	15.0029
Capana08g001921	0.249694	0.287069	0.163585	0.056144	0.12771	0.627437	2.04676	0.223353	0.234828	0.107987	0.191195	0.460616	6.57301	40.3829	34.0509	85.8881	35.0626	1.5774	2.57204	0.656069	0.623682	0.898801
Capana08g001999	1.94648	0.127047	0.840444	0.955696	1.0515	1.2199	6.24452	3.27827	1.64729	7.59991	4.54121	4.43742	3.50758	2.48692	21.162	13.8655	12.0339	1.49386	1.37242	0.191691	1.2654	0.914912
Capana08g002027	0	0	0	0	0.08894	0.118239	0.359498	0.273257	0.967937	0	0.100091	0.061873	1.6719	2.40495	2.7174	3.69292	4.14403	1.7772	0.963328	0.512477	0.592339	1.16648
Capana08g002028	0.636244	0.448329	1.68381	1.73881	2.66222	1.68333	1.0858	2.21377	2.70491	0.858218	3.87341	2.40594	1.18735	1.17578	2.97707	3.24757	5.13631	2.49043	2.21206	1.09671	1.22007	1.05697
Capana08g002040	3.03977	8.37769	5.76432	7.34882	7.7056	3.44402	11.2094	10.5837	5.2026	2.81204	0.48025	0.775892	8.45628	9.54049	13.7497	12.5649	14.8048	10.0493	10.5684	0.075695	0.517463	0.751476
Capana08g002151	3.81821	4.29433	4.64599	8.38213	8.52651	9.67133	4.78349	6.50254	5.46106	10.9962	26.1836	12.7293	4.04008	3.96998	14.1036	21.7931	52.7136	5.76358	5.85301	6.27189	10.8418	8.67346
Capana08g002334	0.451701	0.164723	0.264337	0	0	0.154258	0.15724	0	0.039736	0	0.067079	0.175956	0.304462	0.182684	0.415335	0.313459	0.779674	0.084656	0.637166	0.125551	0.269663	0.322179
Capana08g002386	0.195395	0.150028	0.114122	0.035454	0.066041	0.170696	0.563753	0.597774	0.070772	0	0	0.052231	0.570156	0.833856	3.43197	1.40569	0.16544	0.338996	1.76361	0.223986	0.238798	0.495148
Capana08g002410	3.0027	1.7997	1.30068	1.68258	2.65784	1.52821	0.28411	0.426739	0.124049	0	0	0	3.16069	4.95148	7.1854	4.73025	2.72227	2.82687	7.10821	0	0	0
Capana08g002436	24.3689	43.04	39.2083	40.2126	44.1234	43.3808	23.3386	19.3396	22.5319	10.5293	7.53142	8.60816	73.3092	62.978	71.7388	69.7998	72.1633	47.1396	36.8058	19.2485	25.3862	20.7573
Capana08g002439	6.75603	6.64748	5.27858	8.17766	8.75852	8.56785	7.78585	12.8069	13.3345	9.70306	8.40825	9.73128	12.1901	9.4375	14.953	14.692	15.3623	9.36735	9.99166	14.3001	8.9627	9.16016
Capana08g002454	1.30003	0.358259	0.080007	0.762681	1.0982	1.38133	0.563252	0.379892	0.137029	0	0.085535	0.232878	0.930907	0.9561	1.82222	1.74983	1.37642	0.432697	0.463721	0.355544	1.03868	0.379775
Capana08g002465	0.378208	0.086905	0.409814	0.434315	0.312419	0.381286	0.797773	0.442647	0.728762	0	0.109735	0.535241	0.635786	1.19395	1.76166	1.9088	1.38612	0.182932	0.390279	0.00521	0.073502	0
Capana08g002477	4.237	3.34303	3.78598	3.21682	3.20465	0.983934	0.731398	4.45231	0.321705	4.41334	3.90619	0.437425	1.56001	1.6829	5.41104	5.79574	5.2438	2.5778	4.23363	0.114409	3.19373	3.19844
Capana08g002688	0	0	0	0.232451	0.12241	0	1.26922	0.606467	0	0	0	0	2.00017	2.14234	7.07217	3.88425	0.280908	0.320621	1.69331	0	0	0
Capana08g002694	2.17104	1.97385	1.91757	0.29892	0.86851	0.325929	0.111622	0	0.07375	0	0	0	6.64591	6.32115	7.50872	6.03911	6.62266	0.777493	1.00292	1.44257	2.29714	1.12013
Capana08g002741	10.1266	8.19942	8.30416	4.07682	9.79757	8.27913	7.98716	5.84249	4.12149	4.96091	3.81728	4.41946	6.49568	4.36728	24.6462	39.7411	47.9326	9.05111	9.12951	3.51709	4.68125	3.36592
Capana09g000006	2.3948	1.30712	1.11272	0.379241	0.695014	0.507726	0.660547	0.598495	0.423784	0.384898	0.159458	0.35284	1.61882	2.03705	2.5122	2.74707	2.47507	1.46003	1.43364	0.889141	1.84625	1.67369
Capana09g000110	2.25992	1.83867	3.0436	0.601238	0.585109	1.28155	0.926856	2.21844	0.477802	1.90043	1.329	2.70073	0.643279	1.26412	2.8439	2.86423	3.05984	1.37477	1.79808	1.63185	1.62594	2.4675
Capana09g000144	8.66765	10.5885	11.2721	2.63789	3.28245	2.31267	3.01522	2.25249	1.48476	0.467359	2.28482	1.11822	3.72597	3.45284	16.4078	22.8081	76.5126	3.01605	5.61013	3.91163	16.0084	6.88947
Capana09g000174	22.0418	18.1629	16.3157	10.7858	10.943	12.3028	13.8996	12.4323	8.90955	17.5869	43.5917	24.9272	14.9347	18.8033	31.5788	39.2804	53.0999	13.9597	15.7453	13.7435	15.6575	14.1197
Capana09g000176	5.82021	6.9792	4.92645	17.689	16.5494	18.6124	17.9283	29.2025	33.2033	10.9441	9.25344	11.5006	29.6853	31.4573	40.7786	48.1136	47.5094	22.1624	18.2566	13.2594	15.0105	13.9867
Capana09g000200	56.2254	60.5754	59.6924	39.6227	41.0927	41.567	27.8203	31.4514	28.3922	37.0304	30.1044	35.232	62.1236	63.8952	130.848	139.148	119.443	55.7621	49.9967	72.3723	64.9384	76.6744
Capana09g000386	0	0	0	0	0	0	0	0.032672	0	0	0	0	4.96461	13.4391	59.3507	56.0492	28.8045	0.976573	1.50983	0	0	0
Capana09g000410	0.113237	0	0.066265	0	0.094662	0	0.551577	0.031425	0.171813	0	0.053409	0.092354	11.1925	8.95928	16.3008	13.672	14.6759	2.80296	2.60638	0.19976	0.743064	0.78232
Capana09g000645	76.9501	78.5358	95.5125	99.1736	89.7058	102.525	102.525	92.8588	73.9741	55.731	51.8955	59.9757	172.916	170.671	168.202	196.655	172.367	130.429	132.695	60.5833	79.5113	87.018
Capana09g000656	3.24056	3.97916	2.80659	5.325	5.27752	5.4718	5.47232	6.55658	7.03068	2.08246	3.04059	3.3839	9.27753	7.9597	11.3686	8.39302	8.22126	4.4639	6.63645	3.1495	2.69966	3.41226
Capana09g000728	0.174869	0.201394	0.141415	0	0	0	0.210355	0.041386	0	0	0	0	0.426486	0.396756	1.96252	0.744522	0.145124	0.153607	0.864944	0	0	0.106266
Capana09g001009	2.60674	3.01538	2.7227	3.06122	3.23192	2.93688	4.3214	5.04064	4.75001	1.17976	0.900303	1.12841	5.13623	5.69182	8.98526	6.94245	8.08582	6.65353	4.64196	0.962044	1.06248	0.788563
Capana09g001112	1.31995	0.733434	0.601753	0.756921	1.17004	0.423097	5.79279	2.64011	0	0	0.104948	0.340024	8.1898	8.05565	24.2651	15.264	6.28627	1.75295	6.83075	0	0	0
Capana09g001346	2.11143	1.96743	1.84253	5.40649	5.2717	3.32417	4.71739	6.35564	4.69949	1.81656	1.43958	1.95442	2.93169	4.62139	12.4961	9.34824	8.60904	3.21902	1.73336	0.409764	1.54809	1.12959
Capana09g001569	2.443	0.935616	1.21813	0.817114	0.907587	0.398426	17.2421	5.13198	0.132902	0	0	0	16.8955	27.8841	53.071	27.1807	13.4859	4.33147	16.9054	0.05249	0.093364	0
Capana09g001593	1.40524	1.65125	1.59482	3.8136	3.81843	5.2594	3.14326	4.81549	8.13818	0.909256	1.25151	1.18795	19.3069	19.9131	23.4317	32.9127	36.1664	15.521	12.7986	6.37313	5.45565	5.32217
Capana09g001828	6.0359	7.31802	5.53665	7.77498	7.93467	7.704	4.78308	6.2147	5.039	1.20361	6.585	5.09001	7.55162	11.3318	16.1807	18.9651	26.7189	4.10949	5.16592	2.24424	3.03645	3.22858
Capana09g001849	5.36017	2.98683	2.70035	7.65105	8.44307	7.01985	10.4109	10.4665	10.71	2.36126	1.07649	0.964514	7.62828	8.25719	18.4935	18.972	18.3596	10.6592	8.89785	4.75118	4.70712	6.23492
Capana09g002159	0.938145	0.774077	1.33283	1.48863	1.83106	1.35712	1.28983	1.99497	1.8298	0.057969	0.704385	0.288805	1.74178	2.13805	4.8701	4.59238	6.00045	1.50411	1.37849	1.36984	1.77452	1.22142
Capana09g002213	7.05138	7.35661	8.37269	7.95426	7.46944	9.14761	6.66208	7.77639	6.65142	5.12118	11.0338	8.80801	8.54931	8.48775	14.3328	19.1236	20.8722	6.74504	5.80918	9.4478	10.8532	12.4453
Capana09g002358	0.042919	0.041163	0.095046	0.032602	0.196855	0.188941	0.963144	1.48756	1.4639	0.820392	0.518219	1.50917	0.458046	0.491607	4.7193	2.51782	1.77684	0.848757	1.05207	0.953691	1.36396	1.34238
Capana09g002411	1.26203	1.07463	0.759711	0.769248	0.929469	0.716176	8.9627	2.23717	0.373827	0	0	0	2.89905	5.99202	8.05686	13.1697	8.606	2.65494	6.33268	0	0	0.625498
Capana10g000025	1.48858	0.759075	0.722756	0.607235	0.815315	0.812026	7.07812	3.83573	0.228647	2.83471	2.88812	1.44962	11.7417	13.4632	39.2791	23.029	6.33586	3.37163	11.7146	0.239741	0.478063	0.32822
Capana10g000048	0.771418	0.331192	0.53767	0	0	0	0.134382	0	0.202778	0	0	0	1.19131	1.81632	1.19207	1.06622	3.23872	0.583336	0.561483	0.182396	0.350082	0.311264
Capana10g000055	6.14554	3.49626	2.99783	1.27367	3.62057	2.06692	0.570934	0.161376	1.24178	0	0.027414	0	3.97	4.21557	6.00858	5.39189	5.88672	3.10796	2.56879	0.992632	5.24086	4.43948
Capana10g000094	19.5602	18.8432	22.4526	39.8534	38.8196	38.9247	23.7083	31.4391	34.8091	25.1041	17.9123	22.2795	46.8123	40.0979	51.867	55.3123	50.5597	33.0015	36.7403	36.1889	28.7107	22.8567
Capana10g000212	11.9805	9.91865	11.4162	4.3826	6.01913	8.55872	4.73384	5.57048	5.29899	3.83284	2.90749	3.61366	11.4746	10.049	17.425	20.4414	19.1416	9.11686	7.94839	1.70286	2.90424	3.32381
Capana10g000223	50.3147	58.171	53.3626	118.981	114.646	109.547	108.404	176.835	193.663	129.734	116.02	113.164	143.368	128.553	182.219	176.595	188.244	103.538	107.242	108.98	109.691	108.129
Capana10g000275	0.025764	0.061049	0.001882	0.09626	0.269261	0.34115	0.901851	1.13139	0.855944	0	0.11917	0	1.05675	1.87942	3.62444	4.52581	4.98027	0.134278	0.266593	0.263071	0.417221	0.764404
Capana10g000555	6.76886	6.35194	5.96004	6.91684	7.91728	6.74188	8.80025	12.3654	9.96398	5.1773	10.5204	8.58615	7.16788	8.06868	14.7484	17.7137	20.4874	9.8501	9.27226	8.15276	6.6856	8.03221
Capana10g000584	0	0	0.050145	0.216594	0.733678	0.565643	0	0.133659	0.100203	0	0	0	8.07986	7.17188	8.99502	7.07165	7.06229	3.16025	4.10202	0.259203	0.142564	0
Capana10g000704	0.459618	0	0	0.663756	0.372066	0	0.802202	0.252829	0	0	0	0	2.48045	2.37443	5.93758	3.39114	2.68405	0.29571	2.3087	0	0	0
Capana10g000718	2.34288	1.90734	2.69762	1.54458	2.1132	1.34121	2.68111	2.32141	1.94123	1.84102	4.02159	2.79007	6.06407	6.01932	8.87734	10.1452	10.0759	7.26099	7.27269	2.5648	2.75469	3.02832
Capana10g000837	1.01864	0.480348	0.442893	0.332143	0.474562	0.034843	1.27068	0.91885	0.071266	0	0	0.041526	5.02215	5.19605	13.0775	6.96707	2.60087	0.927804	4.44501	0	0.107714	0.047991
Capana10g000878	6.82643	3.1545	5.72365	3.57279	3.62181	5.37743	12.052	8.66369	9.56955	1.82225	2.24638	3.66697	7.48692	8.6193	14.4393	14.7539	13.3459	4.53203	5.9755	4.20678	6.13894	6.58021
Capana10g001341	4.21293	5.70421	3.19931	3.55142	4.31958	3.10999	1.45529	1.51841	2.06312	0.608509	2.76001	1.24791	6.10769	12.7049	16.156	17.0346	28.4272	1.69621	4.23862	5.43523	11.7108	10.6392
Capana10g001799	13.717	27.5263	24.8213	6.2311	7.32443	9.54782	19.5671	17.9358	15.7335	18.264	40.5726	16.8066	96.6157	64.4906	84.9606	93.1106	93.6071	26.6088	29.4713	42.8785	43.1001	37.2419
Capana10g001855	0.065526	0.059077	0	0.016457	0.027041	0.008162	0	0	0.040589	0.060574	0.064579	0.058751	0.037871	0	3.91027	1.41909	4.78064	0	0.373083	0.087677	0	0
Capana10g001951	20.8563	19.6346	23.0794	31.6088	29.0845	31.5679	33.2724	40.1405	39.3223	29.1925	26.4532	23.1572	51.0008	49.827	57.5831	63.2982	61.8003	37.009	37.0107	25.3073	30.9036	25.7882
Capana10g002130	36.87	34.642	30.8606	26.568	30.4629	32.8572	47.2151	49.0064	50.4721	16.109	14.2738	17.4113	49.6921	41.8713	73.7301	64.0415	63.177	31.0407	30.6756	18.9233	28.089	23.0772
Capana10g002239	18.2433	15.3499	17.7883	21.5013	21.9567	19.0086	9.5656	15.3666	20.2651	14.2649	15.2207	12.8744	36.165	28.4957	31.1923	34.6537	35.296	29.6872	19.8368	16.8073	11.482	15.4003
Capana10g002329	1.29256	2.67458	1.62659	2.21219	2.51036	1.96415	1.33132	2.44372	2.43219	0.539176	1.17617	1.2353	3.23549	3.40947	4.81228	4.66544	5.25775	5.03828	3.24262	1.86075	1.98867	2.69748
Capana10g002474	0.265869	0.138473	0.246526	0.867593	0.545129	0.760821	0.78965	0.298499	0.957685	0.218306	1.13713	1.48227	0.48407	0.17995	1.65751	1.38277	1.61895	0.622151	0.410168	0.059528	0.113904	0.254595
Capana11g000072	1.21172	0.797238	0.361763	0.299367	0.455962	0.161026	6.61155	2.99672	0	0	0	0.445347	10.4762	12.7136	30.7593	17.6757	4.92272	3.55256	14.066	0.084116	0	0.330587
Capana11g000135	0.245544	0.181185	0.360988	0.081261	0.544008	0.668888	0.28648	0.160647	0.036047	0	0	0	0.562137	0.690446	1.3187	1.21601	1.11978	0.238195	0.395829	0.056946	0.240629	0.387006
Capana11g000146	35.5192	33.9887	32.5268	42.8806	33.8033	36.6408	23.0927	25.5328	34.2736	20.645	18.2855	23.0334	85.8038	59.6495	66.2483	64.3524	65.9009	41.4766	41.1119	18.0188	24.1783	25.7778
Capana11g000244	0.084729	0.04036	0.034157	0	0	0	0.272917	0	0	0.09407	0	0	2.69051	18.2045	6.56145	16.8183	7.38758	0.421522	0.726435	0	0	0
Capana11g000365	24.1773	27.4836	23.3846	14.4551	15.8966	17.0666	16.2066	13.482	8.94715	3.19089	3.5618	3.11246	22.1661	28.2742	34.6823	35.5048	35.0515	24.1013	22.8388	14.1136	16.2583	16.4663
Capana11g000431	0.470252	0.03552	0.089579	0	0	0	0.427856	0	0.06437	0	0	0	0.072591	0.346133	0.399754	0.231031	0	0	0.082727	0.160332	0.043242	0.290092
Capana11g000467	2.99077	3.42753	4.04279	1.05787	1.14199	1.34786	0.710124	1.33115	1.85048	0.432896	0.532174	0.548621	7.82402	5.88598	13.0516	11.8646	12.576	7.34319	3.85953	1.22922	1.46042	2.06049
Capana11g001541	0	0	0	0	0	0	1.01009	0.035321	0	0	0	0	5.11423	33.9409	43.5086	79.4686	43.3385	1.69624	3.38077	0	0	0
Capana11g001544	0.241376	0.190527	0.162748	0.081315	0.101288	0.140567	0.305839	0.284001	0.644604	0.359712	0.016776	0.075835	0.694381	0.314196	1.72149	1.97233	1.69311	0.285075	0.155	0.063929	0.410736	0.098032
Capana11g001709	43.2489	45.168	30.8853	30.135	30.0285	32.4286	20.7982	23.5679	30.1124	0.866062	0.541353	1.41665	66.6918	69.2081	83.8607	74.6599	82.4308	41.414	35.3014	3.79295	5.69279	5.50012
Capana11g001867	0	0	0	0	0	0	0	0	0	0	0	0	0.35331	0.208811	0.462494	0.851148	1.11613	0.883312	0.593917	0	0	0
Capana11g001924	0.072266	0	0	0.043092	0	0.125748	0	0	0	0.061823	0	0	1.88344	0.749138	1.44812	1.11138	1.50422	1.03385	0.485837	0	0.065005	0.116238
Capana11g001943	1.47192	0.974734	0.253591	0.020586	0	0	0.143122	0	0	0	0	0	0.146427	0.753667	2.67519	3.92853	0.842023	0	0.056136	0	0	0
Capana11g002071	0.186397	0	0	0	0	0.140279	0.048357	0.048483	0.048647	0	0	0	2.3602	1.79212	3.67861	3.60679	3.5019	0	0.249362	0	0	0
Capana11g002135	0.214759	0.34853	0.213164	2.15389	2.88947	2.46518	1.88175	2.17793	2.04066	0.683891	0.382556	0.731587	5.26994	4.45733	5.63949	5.13967	5.50693	2.47754	2.38406	0.850367	1.77798	1.62197
Capana11g002139	12.1698	10.1758	8.72768	8.08032	7.53834	8.52364	9.30992	7.77665	7.06391	4.55954	4.11914	3.71075	10.492	11.2265	18.043	15.8821	17.0754	9.43548	10.1706	8.58583	11.4504	9.76635
Capana11g002192	7.27675	4.45969	4.87393	3.33875	3.27991	2.10743	9.31845	5.54756	1.1709	0.331378	0.914241	0.208071	29.4934	35.6604	52.0429	32.4407	12.342	7.25004	45.2117	0.442697	0.356101	0.351362
Capana11g002264	0.375556	0.973895	0.226921	1.4258	1.8406	1.90221	1.09357	0.32029	0.203716	0.469517	0	0.250714	2.66231	3.65918	3.77326	3.95642	3.33914	1.95086	1.50738	0.639008	0.691624	0.43611
Capana12g000014	0	0	0.049004	0	0	0	0.078683	0.069771	0.095175	0.069329	0.025171	0.152655	0.439964	0.993317	2.06073	2.4669	4.8566	0.581318	0.505212	0.362945	1.10781	1.07505
Capana12g000049	1.65566	2.9086	2.07832	2.97673	3.48982	4.15953	3.87123	3.69185	4.62933	0.641766	0.499451	0.180119	13.8716	15.1568	17.8268	19.2228	20.5236	11.4045	10.0019	4.54395	5.5208	6.31051
Capana12g000140	7.67621	8.24485	7.87527	12.1407	12.2934	14.1647	7.8744	11.7248	13.2657	6.22027	5.88725	9.19753	17.7238	20.3298	26.5584	22.2151	20.9206	17.139	15.1926	5.52256	7.03473	5.886
Capana12g000145	17.6864	16.036	19.1307	22.7835	24.0474	29.3125	23.2848	29.7878	29.691	32.5856	24.4098	28.2496	32.9841	34.4462	29.3068	37.8548	33.6268	27.2632	26.403	15.7972	22.1229	25.5689
Capana12g000292	10.4233	11.5764	9.88079	11.2001	10.2219	11.0215	15.641	18.2905	23.9137	10.4253	9.58884	10.0226	15.5541	14.3628	22.783	22.985	23.3556	12.9664	12.1694	13.3707	16.1877	14.645
Capana12g000399	3.64775	2.59085	3.43038	4.18326	4.11379	8.92767	2.75769	3.79149	1.0812	0.164772	0.096956	0	10.0323	13.253	16.4922	22.7216	19.0619	5.19495	5.66102	0.908001	3.13493	2.07428
Capana12g000438	56.3895	53.8461	65.3473	82.7605	81.2897	79.547	53.6255	78.081	80.6577	81.291	55.338	57.0865	95.9422	94.5394	100.016	101.291	98.8145	99.21	78.4233	53.1156	48.2597	46.4162
Capana12g000473	21.5835	16.7899	25.4366	30.4635	23.7208	36.2867	36.3618	59.3248	70.4461	45.6511	45.2375	29.5923	47.1062	52.3925	55.0074	77.7879	86.3277	48.9319	32.9694	29.5426	26.3725	28.8181
Capana12g000497	28.318	27.1924	23.9436	19.6454	22.9435	21.4641	28.5946	36.0238	36.8234	24.6679	21.235	22.8508	29.8656	31.437	39.9405	42.7231	43.526	24.9573	24.6339	30.9465	36.1223	30.7245
Capana12g000520	11.6702	9.50372	10.0188	10.5282	10.1968	8.95458	7.21024	10.5205	11.8639	2.0366	3.04387	2.13781	33.0408	32.304	35.9464	36.0033	36.1241	27.9818	20.3295	2.29222	3.11295	2.87935
Capana12g000572	2.05944	3.89438	3.39448	3.74415	4.53467	4.01468	3.27684	5.04021	5.35035	8.58303	9.80172	5.16624	10.3716	7.07049	12.6426	11.874	22.3635	4.85827	6.22773	6.6046	7.63341	9.23245
Capana12g000664	42.2718	49.4237	57.1204	108.645	97.178	125.643	41.3338	72.2121	74.9977	64.0906	45.255	56.8238	113.01	130.127	185.225	183.243	155.496	120.11	98.3858	26.1353	25.7728	36.074
Capana12g000777	0.46923	0.402715	0.632983	2.312	3.22805	2.86834	2.48366	2.89261	2.05299	1.81965	2.75941	4.18932	5.59592	7.70236	10.1523	11.3575	12.7212	3.68128	3.29188	3.65575	4.49596	8.14671
Capana12g001288	0.819741	1.71022	0.79041	3.72411	2.44962	5.02143	1.84926	1.60767	1.17499	0.240853	0.121384	0.615478	2.80646	4.26535	3.99428	5.33297	5.15654	2.04999	3.00427	1.71384	2.97027	3.20993
Capana12g001405	4.32795	5.21482	5.71351	4.507	4.99548	4.19865	3.60968	4.45355	3.75832	0.210176	0.518192	0.101108	4.38125	6.34722	10.7638	9.07789	9.49264	6.09539	7.85668	2.19358	4.05042	2.53227
Capana12g001848	43.3626	37.778	43.3422	56.3996	55.9742	61.4166	44.1885	64.3518	71.4163	79.5655	70.2912	72.2342	86.0088	87.2635	73.3728	89.4589	95.0758	62.5739	44.5896	44.7355	43.6183	47.9891
Capana12g002030	0.900171	0.547136	0.598919	1.16524	0.79514	0.878213	2.58416	2.27597	3.36472	0.551421	0.282879	0.508325	6.03453	4.50704	5.06133	5.27101	6.09816	5.46099	4.2862	1.06854	1.23531	1.16073
Capana12g002146	396.179	454.005	442.942	1106.62	1204.31	1042.55	629.781	982.114	952.298	797.27	625.123	749.126	1831.47	1406.17	1982.54	1951.57	1945.3	1112.21	1288.81	1152.7	1220.62	1051.86
Capana12g002257	259.835	353.38	295.406	213.337	220.57	230.806	178.991	159.637	194.591	201.937	153.491	168.13	269.587	336.506	310.601	363.475	364.384	348.913	348.376	49.1107	74.3723	95.471
Capana12g002356	1.45092	1.85674	1.32602	5.37604	5.71182	5.6116	2.13532	6.53482	3.30666	2.07517	6.09454	9.2238	3.03125	2.54032	15.5918	19.4514	24.7587	2.99908	2.73083	0.911259	0.905006	1.01527
Capana12g002400	64.9716	72.6947	67.1085	77.6786	81.1272	88.7835	73.7013	112.469	130.129	123.163	98.1723	103.48	75.8147	86.9013	211.128	223.758	259.108	135.445	104.152	51.111	51.123	48.8343
Capana12g002664	0.168983	0.211068	0.085105	0	0.081159	0.055121	0.151075	0.082367	0.132232	0	0	0	0.081748	0.617553	1.44406	0.971225	2.08321	0.079349	0.553034	0.383416	1.01968	0.525045
Capana12g002686	1.67381	1.25352	2.21281	0.277923	0.123654	0.220489	0.277579	0.050265	0.419602	0	0	0	5.70177	6.94149	5.8564	7.08374	7.19639	1.5084	2.33977	0.079676	0.650267	0.256179
Capana12g002689	0.858067	0.473816	1.28797	1.98867	2.92909	2.67774	1.11331	2.90887	1.70127	0	0	0	3.35945	1.32765	3.95065	4.82444	3.33156	0.633982	0.780638	0.900268	1.61326	1.98679
Capana12g002765	1.3867	1.40483	1.51492	1.03837	1.70901	0.964042	1.46947	0.910415	1.60075	0.626238	0.981596	0.616389	2.77985	2.90528	5.22806	5.76444	5.10585	1.45626	1.33871	2.4356	3.2939	2.94678
Capana12g002795	1.9445	1.49766	1.41521	1.46015	2.01063	1.812	3.07546	1.40581	0.73784	0.985388	1.87158	1.06188	6.85516	7.84628	16.9006	9.78101	4.31271	2.22687	8.15504	0.305516	0.986204	1.26917
Capana12g002893	7.28294	8.37355	7.8505	12.7589	14.8241	14.4525	9.80153	15.365	15.7695	3.78743	16.8788	6.52817	15.0663	11.5599	16.8851	18.7943	21.7017	7.25296	6.70504	4.84995	8.78969	6.505
Capana12g002896	57.8954	56.0713	51.642	41.6661	41.6425	40.7529	53.9853	61.2511	63.292	9.65095	7.89728	9.82363	63.7869	56.6422	75.6113	74.8971	81.3162	55.7109	54.8241	44.8813	59.7358	52.482
FPKM value in the RNA-seq
