# Supplementary material for: Integrative Analysis of the Metabolome and Transcriptome of a Cultivated Pepper and Its Wild Progenitor Chiltepin (Capsicum annuum L. var. glabriusculum) Revealed the Loss of Pungency During Capsicum Domestication
Source: Front Plant Sci. 2022 Jan 5;12:783496. doi: 10.3389/fpls.2021.783496 (PMC8767146; doi:10.3389/fpls.2021.783496)
Supplement: Supplementary file 10 [file Table_10.XLSX]

## Sheet: node
Supplementary Table S9 18 Hub genes connected to the capsaicinoids biosynthesis pathway in pepper fruit during Capsicum evolution
ID	Node	function
Capana02g002339	AT3-D2	gene
Capana01g000111	KasI-D1	gene
Capana01g004020	KasIIIb-D1	gene
Capana05g002486	GT86A1	enzyme
Capana01g000441	bHLH35	TF
Capana02g001064	TCP20	TF
Capana02g001642	WRKY65	TF
Capana02g002706	ERF1	TF
Capana03g001041	MYB1R1	TF
Capana03g003248	HFA6B	TF
Capana05g000375	GAT15	TF
Capana05g001949	ERF5	TF
Capana05g001951	ERF106	TF
Capana06g000460	MYB59	TF
Capana08g001686	PIF3	TF
Capana11g002139	bHLH49	TF
Capana12g000049	bHLH122	TF
Capana12g002686	bHLH96	TF

## Sheet: edge
Supplementary Table S9
fromnode	tonode	weight
AT3-D2	KasI-D1	0.981
AT3-D2	KasIIIb-D1	0.963
KasI-D1	KasIIIb-D1	0.949
TCP20	AT3-D2	0.63
WRKY65	AT3-D2	0.809
ERF1	AT3-D2	0.65
MYB1R1	AT3-D2	0.762
HFA6B	AT3-D2	0.779
GAT15	AT3-D2	0.647
ERF5	AT3-D2	0.736
ERF106	AT3-D2	0.867
MYB59	AT3-D2	0.818
PIF3	AT3-D2	0.754
bHLH49	AT3-D2	0.739
bHLH122	AT3-D2	0.833
bHLH96	AT3-D2	0.839
bHLH35	KasI-D1	0.577
TCP20	KasI-D1	0.707
WRKY65	KasI-D1	0.863
ERF1	KasI-D1	0.695
MYB1R1	KasI-D1	0.789
HFA6B	KasI-D1	0.754
GAT15	KasI-D1	0.646
ERF5	KasI-D1	0.789
ERF106	KasI-D1	0.898
MYB59	KasI-D1	0.85
PIF3	KasI-D1	0.739
bHLH49	KasI-D1	0.78
bHLH122	KasI-D1	0.82
bHLH96	KasI-D1	0.811
TCP20	KasIIIb-D1	0.637
WRKY65	KasIIIb-D1	0.706
ERF1	KasIIIb-D1	0.616
MYB1R1	KasIIIb-D1	0.703
HFA6B	KasIIIb-D1	0.693
GAT15	KasIIIb-D1	0.583
ERF5	KasIIIb-D1	0.697
ERF106	KasIIIb-D1	0.85
MYB59	KasIIIb-D1	0.72
PIF3	KasIIIb-D1	0.698
bHLH49	KasIIIb-D1	0.682
bHLH122	KasIIIb-D1	0.705
bHLH96	KasIIIb-D1	0.754
TCP20	bHLH35	0.73
GAT15	bHLH35	0.561
ERF5	bHLH35	0.722
ERF106	bHLH35	0.576
bHLH96	bHLH35	0.538
WRKY65	TCP20	0.581
ERF1	TCP20	0.753
MYB1R1	TCP20	0.559
ERF5	TCP20	0.788
ERF106	TCP20	0.657
MYB59	TCP20	0.581
ERF1	WRKY65	0.5787
MYB1R1	WRKY65	0.75
HFA6B	WRKY65	0.766
GAT15	WRKY65	0.599
ERF5	WRKY65	0.659
ERF106	WRKY65	0.76
MYB59	WRKY65	0.85
PIF3	WRKY65	0.676
bHLH49	WRKY65	0.777
bHLH122	WRKY65	0.829
bHLH96	WRKY65	0.767
MYB1R1	ERF1	0.743
ERF5	ERF1	0.803
ERF106	ERF1	0.679
MYB59	ERF1	0.633
PIF3	ERF1	0.547
HFA6B	MYB1R1	0.789
ERF5	MYB1R1	0.795
ERF106	MYB1R1	0.882
MYB59	MYB1R1	0.913
PIF3	MYB1R1	0.935
bHLH49	MYB1R1	0.741
bHLH122	MYB1R1	0.847
bHLH96	MYB1R1	0.828
ERF5	HFA6B	0.672
ERF106	HFA6B	0.762
MYB59	HFA6B	0.821
PIF3	HFA6B	0.839
bHLH49	HFA6B	0.655
bHLH122	HFA6B	0.883
bHLH96	HFA6B	0.89
ERF106	GAT15	0.621
MYB59	GAT15	0.551
bHLH49	GAT15	0.76
bHLH122	GAT15	0.695
bHLH96	GAT15	0.622
ERF106	ERF5	0.895
MYB59	ERF5	0.755
PIF3	ERF5	0.701
bHLH49	ERF5	0.625
bHLH122	ERF5	0.702
bHLH96	ERF5	0.643
MYB59	ERF106	0.863
PIF3	ERF106	0.859
bHLH49	ERF106	0.811
bHLH122	ERF106	0.815
bHLH96	ERF106	0.813
PIF3	MYB59	0.901
bHLH49	MYB59	0.845
bHLH122	MYB59	0.924
bHLH96	MYB59	0.851
bHLH49	PIF3	0.768
bHLH122	PIF3	0.889
bHLH96	PIF3	0.87
bHLH122	bHLH49	0.829
bHLH96	bHLH49	0.786
bHLH122	bHLH96	0.912
AT3-D2	GT86A1	0.642
KasI-D1	GT86A1	0.622
WRKY65	GT86A1	0.691
ERF1	GT86A1	0.562
MYB1R1	GT86A1	0.824
HFA6B	GT86A1	0.752
ERF5	GT86A1	0.578
ERF106	GT86A1	0.608
MYB59	GT86A1	0.744
PIF3	GT86A1	0.776
bHLH49	GT86A1	0.595
bHLH122	GT86A1	0.835
bHLH96	GT86A1	0.824
